# Supplementary material for: PPARγ agonist treatment reduces fibroadipose tissue in secondary lymphedema by exhausting fibroadipogenic PDGFRα+ mesenchymal cells
Source: JCI journal article supplement (doi:10.1172/jci.insight.165324), 2023-12-21
Supplement: sd6 [file 6]

"","gene","baseMean","log2FoldChange","lfcSE","stat","pvalue","padj"  
"1","PLP2",640.233452733665,-1.75153887829225,0.153895268775622,-11.38  
13692404409,5.17802922213276e-30,7.98193204591765e-26  
"2","TNFRSF12A",110.121936055088,-2.3000091803517,0.259580314548416,-8  
.86049153747642,7.96624093935279e-19,6.13998020400616e-15  
"3","ANOS1",168.098137814156,2.6275811959801,0.306334689236577,8.57748  
498065416,9.69700375196524e-18,4.98264376121814e-14  
"4","CCN3",118.32474994201,-2.13444082876737,0.26446757136203,-8.07070  
907701398,6.98910701450436e-16,2.69342711571462e-12  
"5","CAV1",1821.98329407341,-1.77230739618196,0.238014887563783,-7.446  
20395103232,9.60642599504762e-14,2.96166113427318e-10  
"6","CD36",159.749348023261,-2.73117764576374,0.376311245263662,-7.257  
76250414772,3.93545738822371e-13,1.01108459399114e-09  
"7","FABP4",265.595261125657,-2.94477251342905,0.409928152144363,-7.18  
36308339028,6.78840111386551e-13,1.49490290243195e-09  
"8","VEGFD",794.632208681302,1.53900539590106,0.222071515075282,6.9302  
2423600495,4.20174069223933e-12,8.09622909635867e-09  
"9","PDGFD",699.176119500167,1.75791374299692,0.259660392469976,6.7700  
49626264,1.2873822943889e-11,1.98449980680048e-08  
"10","DYNLT3",91.8332152417499,-1.56421801130949,0.230748799772191,-6.  
77887821238408,1.21112564274216e-11,1.98449980680048e-08  
"11","CTHRC1",1623.46600024854,-1.8735508500622,0.281287661960683,-6.6  
6062221500521,2.72670714320603e-11,3.8211082375019e-08  
"12","ARSI",26.3102140570139,-2.98402748563309,0.4514318040619,-6.6101  
4013364447,3.83956391771337e-11,4.93223981596263e-08  
"13","CD9",1239.00201406808,-2.77178775329661,0.421086337097454,-6.582  
46898344536,4.62699351720987e-11,5.48654654367617e-08  
"14","PERP",171.254599976734,-2.58210858495597,0.393725810488684,-6.55  
813897938546,5.44834211360065e-11,5.99901383436814e-08  
"15","LMNA",4855.3418298381,-1.2362994509148,0.193205965282115,-6.3988  
6790819104,1.56533183390319e-10,1.60863934797451e-07  
"16","ANGPTL1",489.52322093608,-1.15369911815002,0.182913801683966,-6.  
30733770513038,2.83875992577442e-10,2.73496776598829e-07  
"17","SEMA3E",84.3002378014287,-3.05079035424434,0.486701311178682,-6.  
26830107947729,3.65008516861467e-10,3.30976840436442e-07  
"18","TRIL",144.462350072582,1.6025046320406,0.25748751126547,6.223620  
80461611,4.85810427362251e-10,4.16042652099395e-07  
"19","C10C",19.4209726010317,-2.62252498252928,0.426001481089724,-6.15  
614052754181,7.45390884710945e-10,6.04747394095748e-07  
"20","TNFAIP6",835.785250372251,-2.25572096239022,0.369416647229332,-6  
.10617030745201,1.02050115291798e-09,7.86551263611535e-07  
"21","C10A",46.7398565912725,-2.25781257891793,0.373325486545545,-6.04  
783937954498,1.46801199412805e-09,1.04194779927264e-06  
"22","SPP1",28.7519188497775,-3.37647628645835,0.558486407758652,-6.04  
57626892103,1.48704843230608e-09,1.04194779927264e-06  
"23","C10B",40.5081461185447,-2.69019512651826,0.448092686432343,-6.00  
365774308268,1.92921154058562e-09,1.29299112600553e-06  
"24","CAPG",270.675108276406,-2.22129527034489,0.379558087598366,-5.85  
231969209249,4.84763670114389e-09,3.11359665617221e-06  
"25","MUC12",37.0338783765435,-2.16149506790173,0.372179983308126,-5.8

0766071482206,6.33517304025541e-09,3.90626769662149e-06  
"26","TJP2",31.3936401993536,-2.20976722540196,0.385388360421075,-5.73  
38712123728,9.81638801060412e-09,5.47995622972045e-06  
"27","ADIRF",1583.03059586396,-2.11536991977506,0.369077040301165,-5.7  
3151317689372,9.95386146170435e-09,5.47995622972045e-06  
"28","MIR497HG",75.43043467663,1.51072977618673,0.263436446192072,5.73  
470299202734,9.76833698851167e-09,5.47995622972045e-06  
"29","NBL1",1019.44862265288,-1.31148183472325,0.230651019791441,-5.68  
600059045527,1.30048944995418e-08,6.64798888119972e-06  
"30","CXXC5",265.028541030702,-0.880112303669745,0.155347026266974,-5.  
66545961528234,1.46630958132203e-08,6.64798888119972e-06  
"31","MARCKS",7271.19987213329,1.52448059849426,0.268834975455749,5.67  
069294428617,1.42221097622406e-08,6.64798888119972e-06  
"32","IL7",33.720567943225,-2.53455266671186,0.44630188257956,-5.67900  
957993392,1.35476892712025e-08,6.64798888119972e-06  
"33","FREM1",98.4946323519748,1.51777533830322,0.267781767752295,5.667  
95622809989,1.44510869312958e-08,6.64798888119972e-06  
"34","FXD5",342.689772917045,-1.88338922610435,0.331162818867551,-5.6  
8720012876088,1.29139088974176e-08,6.64798888119972e-06  
"35","RNASE1",44.2420929019324,-2.57246512716116,0.457051528692156,-5.  
62839191135018,1.81897429116522e-08,8.01128248523198e-06  
"36","RGCC",238.030822912004,-1.55903306710693,0.278774678914253,-5.59  
244861541558,2.23889425517363e-08,9.58682081763931e-06  
"37","KCP",59.9360089557963,3.59402270884391,0.647869957463928,5.54744  
461822651,2.89874934765117e-08,1.20768165389305e-05  
"38","GSTM1",10.7468032312369,6.4094429128127,1.16015882920957,5.52462  
538011242,3.30189372152856e-08,1.33943925572007e-05  
"39","DBNDD2",811.665352795712,-1.74364761952678,0.315931670306185,-5.  
51906561895782,3.40806925099804e-08,1.34706121805474e-05  
"40","ADAMTSL3",148.585877047574,1.61465587191865,0.293874647905596,5.  
49436939670053,3.92108979300007e-08,1.5110899789774e-05  
"41","A2M",63.8002530778878,-1.85843018983322,0.346674384614991,-5.360  
73696906438,8.28831245772267e-08,3.11620333014134e-05  
"42","FZD6",30.2978977915033,-2.06023077322312,0.388564823055715,-5.30  
215462383147,1.1444384233243e-07,4.20036149893907e-05  
"43","AC074387.1",13.4998010565898,-3.82977610849887,0.733637773277726  
, -5.22025480147826,1.78677128899073e-07,6.40536730692838e-05  
"44","TMCC3",65.7641531614466,1.44939861621058,0.278568348223554,5.203  
02692482287,1.96068449581977e-07,6.86907988705947e-05  
"45","KCND2",108.832344146764,1.48827766530298,0.287898998749932,5.169  
4436999265,2.34791852563534e-07,7.78625705493695e-05  
"46","PTGER2",26.4540471309807,-2.13610636381445,0.413383056707315,-5.  
16737763958929,2.37401285489482e-07,7.78625705493695e-05  
"47","C16orf89",121.499388562633,1.34180691595865,0.25947507300009,5.17  
123629811637,2.32550272801726e-07,7.78625705493695e-05  
"48","FGF12",22.2303375556067,3.55125853201795,0.68837034455107,5.1589  
3597120887,2.48357219794375e-07,7.97588863152143e-05  
"49","S100A6",33134.9246176505,-1.01474313528498,0.197371022761509,-5.  
14129744623727,2.72847698550176e-07,8.5835658635734e-05  
"50","CSF1",801.330912069767,0.714842497836395,0.13943512433828,5.1267

0319784083,2.94859793848643e-07,9.09052744435366e-05  
"51","MID1IP1",332.147299219982,-1.39399907213646,0.272385501099571,-5  
.1177432958404,3.09213058468306e-07,9.34611626723322e-05  
"52","KLHL13",83.0941007990936,1.76821088456386,0.346529620854717,5.10  
26255135205,3.34973439939903e-07,9.93002995514154e-05  
"53","F13A1",12.6631557654097,-3.30069241269399,0.64737795058507,-5.09  
855550333615,3.42255182570571e-07,9.9544596968403e-05  
"54","BEND6",80.2747667796532,-1.46449651458504,0.28835495226617,-5.07  
879786033019,3.79830571948592e-07,0.000108427560492362  
"55","ADAMTS16",148.698676194226,2.63245274532519,0.519212076226415,5.  
07009152109406,3.97624447384777e-07,0.000111443288298842  
"56","CRIM1",236.023107275401,1.04565434470299,0.206665740735267,5.059  
64046572403,4.20047747411529e-07,0.000111682866322473  
"57","IL17RD",167.262876105909,1.19332788462678,0.236105246709073,5.05  
422010421136,4.32153004710742e-07,0.000111682866322473  
"58","VEGFC",179.694098475054,1.82518221239556,0.360947563990861,5.056  
64089325112,4.26705650775022e-07,0.000111682866322473  
"59","TBC1D12",265.717237353484,1.17793563898149,0.233111655760085,5.0  
5309627328889,4.3470463699957e-07,0.000111682866322473  
"60","SERPINA5",117.423083488884,-1.23343367441688,0.243492013448673,-  
5.06560218114456,4.07111327145151e-07,0.000111682866322473  
"61","LINC00702",41.5366857574679,-2.09915213545243,0.415803125393288,  
-5.04842798732439,4.45460321290265e-07,0.000112570013978515  
"62","ADAMTSL1",242.555085117468,1.38851975994326,0.275560522156413,5.  
0388921790296,4.68234156209873e-07,0.000116416605128632  
"63","WASF1",113.873732292863,0.996042933447534,0.197936487031773,5.03  
213403644802,4.85049932533628e-07,0.000118683249365173  
"64","LINC00968",30.7838332297887,2.44970719669035,0.489669520539947,5  
.00277655425463,5.65104282678811e-07,0.000136110664335842  
"65","CRIP1",7286.074644155,-1.25912805698284,0.25203988390529,-4.9957  
4923410133,5.8607777273221e-07,0.000138990597948723  
"66","CRIP2",378.418553436766,-1.76201437259424,0.35298942927423,-4.99  
169161019089,5.98527657381999e-07,0.000139792482402174  
"67","GPX3",4646.26199242989,0.981927631830973,0.197460373303915,4.972  
78322430633,6.59984472789763e-07,0.000151845681314242  
"68","LUZP2",58.7591928748761,2.58360771260415,0.520205322680377,4.966  
51533531418,6.81666650685812e-07,0.000154527815004732  
"69","IL33",411.159839323734,0.775795686334336,0.157081038350437,4.938  
82453592897,7.85948909881757e-07,0.000175585542693149  
"70","CCDC34",126.368863729456,-1.08829012179664,0.220929410335299,-4.  
92596309447879,8.39458420870245e-07,0.000184860736538783  
"71","TUBA1C",218.018989299372,-1.38502791336113,0.282539307705854,-4.  
9020715899929,9.48312621051472e-07,0.000205890690894485  
"72","EMCN",61.8876818752754,-2.25376776309315,0.461050100531532,-4.88  
833591077162,1.01691907459867e-06,0.000217719549096369  
"73","STEAP4",378.171047245277,1.67831788925616,0.343826837425111,4.88  
128821422126,1.0539507229679e-06,0.000220611150670969  
"74","ABCA1",615.158056539877,1.8571157522245,0.380736805309694,4.8776  
8906584671,1.07335947455872e-06,0.000220611150670969  
"75","PCSK6",64.2043030394949,1.68092070333356,0.344533718381885,4.878

82785820809,1.06718152768737e-06,0.000220611150670969  
"76","PXDNL",75.812602133033,2.17861114884563,0.446920291626253,4.8747  
1969759552,1.08963060188165e-06,0.000221008628000075  
"77","DTNA",9.67030791843495,-2.93660009266364,0.604675651553946,-4.85  
648807772716,1.19485972052517e-06,0.000239204708985657  
"78","FOLR2",13.9148452189081,-2.59881574505038,0.540296861103733,-4.8  
0997749966833,1.50947286565644e-06,0.000298314413129411  
"79","S100A3",22.9979168891352,-2.31168746125782,0.482426202351585,-4.  
79179499369957,1.6529575711654e-06,0.000322535961512844  
"80","NTM",587.853768000704,0.952373267825782,0.199118167895255,4.7829  
5515619034,1.72736672815301e-06,0.000332841976430984  
"81","KCNB2",19.2622715783645,2.7047319458758,0.566873606246107,4.7713  
1395089427,1.83027995019633e-06,0.000348318091756499  
"82","CCL18",7.46596860467055,-4.04950892254182,0.849561342218969,-4.7  
6658802761071,1.87371886161747e-06,0.000352236295754064  
"83","GPC1",72.3649767948434,-1.37932254088274,0.289677988917111,-4.76  
157179231669,1.9209093789926e-06,0.000356756844303264  
"84","PLAUR",165.33815977764,-1.1575845765135,0.243338515544117,-4.757  
0955790746,1.96398193942652e-06,0.00036041406662214  
"85","MAF",968.478143623124,0.891967706226398,0.188987812615041,4.7197  
1019656855,2.36180881888467e-06,0.000428320975801261  
"86","MGAT4C",16.529263426913,5.03939858188581,1.06834624930941,4.7170  
0872740773,2.39337427694428e-06,0.000428998424175536  
"87","PTGDR",9.58802018513565,-3.13857994635224,0.665732559989594,-4.7  
1447565430974,2.42333975258372e-06,0.000429376807885954  
"88","TAGLN2",1700.74164793601,-0.965587724280656,0.206213465311326,-4.  
.68246689333737,2.83442976794268e-06,0.000496508350827687  
"89","HMGAI1",61.2744709897679,-1.66629829120597,0.356163893171681,-4.6  
7845933614267,2.89038475633938e-06,0.000500621135044624  
"90","CAV2",227.720454129105,-0.904546789604828,0.19363302001268,-4.67  
144906145447,2.99082273551154e-06,0.000512261471865671  
"91","HRH2",22.1103363439358,2.41564660791992,0.519390200753785,4.6509  
2834715426,3.3044413357628e-06,0.000541893225433868  
"92","ACP5",13.5490703249553,-3.02026463695432,0.649369307417546,-4.65  
107389963579,3.30210964200301e-06,0.000541893225433868  
"93","EYA2",25.9534888294525,2.76971471013713,0.595196710591218,4.6534  
4424935737,3.26435893152655e-06,0.000541893225433868  
"94","MT-  
CYB",40897.6774971142,-0.687053779634363,0.147527259944594,-4.65713102  
712269,3.2064638601748e-06,0.000541893225433868  
"95","PHACTR2",565.12145270645,1.03050431632642,0.22322964367078,4.616  
34171600532,3.90563653563112e-06,0.000614340685681161  
"96","PROSER2",35.0710978759136,1.39967866941833,0.303102879377416,4.6  
1783362894248,3.87766937607251e-06,0.000614340685681161  
"97","ID1",303.600542945661,-1.3515213347541,0.292763353875498,-4.6164  
2933401035,3.90398873279051e-06,0.000614340685681161  
"98","FOXRED2",72.382771024598,1.01830998347345,0.220391132694739,4.62  
04671259796,3.82877009902573e-06,0.000614340685681161  
"99","FBN1",10811.6495938132,1.24147471616913,0.269248143205592,4.6108  
9425311715,4.00940465709962e-06,0.000624292654436269

"100", "PARP16", 97.9471350997034, -1.48536369909565, 0.322390437461818, -4.60734415942956, 4.07844658019857e-06, 0.00062869254033761  
"101", "ADAMTS5", 3002.42371077223, 1.1730905698345, 0.255145849501118, 4.59772546615289, 4.27128296453127e-06, 0.000651899276220293  
"102", "NID1", 1270.57532449844, 1.30187648017437, 0.283522958701842, 4.59178503968508, 4.39470896454086e-06, 0.000664161163611739  
"103", "CDA", 84.351364699804, -2.09826405262104, 0.45874910443321, -4.57388152335135, 4.78770637595784e-06, 0.000716529065877574  
"104", "STAC", 64.5643909348906, 1.32212150944006, 0.289764143649354, 4.56275056254019, 5.04877845423899e-06, 0.000748335768000904  
"105", "DLGAP2", 16.193366524223, 2.58234489049955, 0.56658494569913, 4.55773650553511, 5.17078500840355e-06, 0.00075912048480515  
"106", "NFATC2", 56.338767089299, -2.1029961037932, 0.461716641213147, -4.55473317632139, 5.24521136094223e-06, 0.000762782388008722  
"107", "C11orf96", 2990.35610645884, -1.55274608756027, 0.341606736432884, -4.54541998724708, 5.48258217540902e-06, 0.000789850506859159  
"108", "MAN2B1", 197.739878828952, -0.728759291737188, 0.160483397916604, -4.5410260575109, 5.59811113982074e-06, 0.000799026696484599  
"109", "LAMA4", 1589.95109115988, 0.926324655470595, 0.20417756183187, 4.53685824808396, 5.70984569776602e-06, 0.000807497903037276  
"110", "RDH10", 168.754600382386, 1.62627994270576, 0.35874931458428, 4.5331931702512, 5.80986374450628e-06, 0.000814173178377857  
"111", "PLEKHA2", 241.269906048961, 1.10823384350973, 0.244694250543838, 4.52905550925963, 5.92479335942147e-06, 0.000822799005725062  
"112", "SYNE2", 479.46263434085, 1.0201228564095, 0.225364640463211, 4.52654353545772, 5.99562521906821e-06, 0.00082520145314229  
"113", "TET1", 159.125654000977, 0.869998931636503, 0.192729213942538, 4.51409993243627, 6.35862309004665e-06, 0.000867417477283797  
"114", "TRIO", 743.766898154242, 1.08703563562548, 0.240939853457034, 4.51164728470016, 6.43260925424873e-06, 0.000869812909247756  
"115", "VSIG4", 13.465579151281, -2.69860387389366, 0.598568504136738, -4.50842945334321, 6.53092774801699e-06, 0.000875428271614625  
"116", "SSC5D", 498.587796679632, -1.0481958377028, 0.232614998360504, -4.50614038256602, 6.60174203102017e-06, 0.000877291839725654  
"117", "MAP4K3-DT", 116.96117527313, 0.969856087799973, 0.21604533966235, 4.48913218547426, 7.15139125408472e-06, 0.000938367006743659  
"118", "TUSC1", 299.219397616594, -0.942109408920146, 0.209908544003659, -4.48818990857144, 7.18308834224793e-06, 0.000938367006743659  
"119", "VGLL3", 638.571664316977, 1.6928384956555, 0.380423259919685, 4.44988168182171, 8.59176097150263e-06, 0.00110526974400368  
"120", "NAV2", 48.7692453806764, -2.06009377940419, 0.462986829356527, -4.4495731817412, 8.60411088423238e-06, 0.00110526974400368  
"121", "RAB13", 621.588377539364, -1.14933415523537, 0.259094821189101, -4.43595958406487, 9.16630458476656e-06, 0.00116775690226592  
"122", "LAMC1", 2118.33251533844, 1.05300210494488, 0.237705597826125, 4.42985825565253, 9.42950450808952e-06, 0.00119144108190328  
"123", "SLC02B1", 9.5902707102528, -2.72837280713458, 0.616384562613267, -4.42641326961074, 9.58128799750473e-06, 0.00120077686570354  
"124", "VIM", 57895.5874248158, -0.99124003285925, 0.224227103152655, -4.42

069677983758,9.83831467927426e-06,0.00122304532887913  
"125","FCGR1A",7.16399320172498,-2.89982386054232,0.658977001160856,-4  
.40049327280616,1.08005076148804e-05,0.00133191859906705  
"126","RGS2",171.862523692025,-1.56019296547322,0.355090809969529,-4.3  
9378581948406,1.11393566978326e-05,0.00135207231100071  
"127","PIM3",140.108491122106,-0.903871837471399,0.205667840396399,-4.  
39481367494938,1.10867807138953e-05,0.00135207231100071  
"128","RPL39L",29.6501459199545,-1.44024756160006,0.328499058249168,-4  
.38432782509721,1.16344457915759e-05,0.00137957678367033  
"129","MS4A4A",17.1417713972449,-2.18768757008327,0.498641760808729,-4  
.38729312710419,1.14770068036854e-05,0.00137957678367033  
"130","TBC1D2B",397.055433615311,0.795678809236307,0.181437402713529,4  
.38541776577679,1.15763386448389e-05,0.00137957678367033  
"131","ADD3",2566.40075053702,0.687388280983194,0.156991020465359,4.37  
851973282044,1.19488123794293e-05,0.00140603773151834  
"132","CD163",23.5891282034252,-2.35021774161624,0.537084130001569,-4.  
37588379609984,1.20941436018341e-05,0.00141235775471419  
"133","SLITRK2",34.9730954522981,-2.17913629578685,0.498486699196111,-  
4.37150339076459,1.23393933661141e-05,0.00143016352435075  
"134","APCDD1",40.1334567848678,2.31186201808827,0.529339629990467,4.3  
6744556255858,1.25708114410319e-05,0.00144611237584707  
"135","AGTR1",899.212626934733,0.961435770185515,0.223322082996862,4.3  
0515315495702,1.66870248693215e-05,0.00190541102489326  
"136","PLEKHG1",39.0586050054489,1.64524331842887,0.38264060669058,4.2  
9970915177668,1.71022407516501e-05,0.0019384635381374  
"137","TWIST1",743.990429115625,-1.35209910298323,0.31471785461972,-4.  
29622623291264,1.73730285793927e-05,0.00195478274125065  
"138","SYCE1L",47.9742064270049,-1.73424325808852,0.404396780642243,-4  
.28846949605849,1.79908500474242e-05,0.00200963009768872  
"139","LARP6",514.117691668226,-0.656869121787194,0.153271207091,-4.28  
566548312755,1.82192966849648e-05,0.0020205068949549  
"140","PFKP",187.13008381354,-1.25041029648835,0.291959123972987,-4.28  
282658021689,1.84533995660964e-05,0.00202365872948233  
"141","SHTN1",50.8405500027008,-1.29326637550812,0.302215856191163,-4.  
2792803521536,1.87498569316615e-05,0.00202365872948233  
"142","LYVE1",12.2651494244078,-2.78129898315296,0.649539386716922,-4.  
28195585984548,1.85257736353329e-05,0.00202365872948233  
"143","ABCG1",46.5744840067126,2.37998198924158,0.5561995024634,4.2790  
0776376223,1.87728315482305e-05,0.00202365872948233  
"144","EDN1",24.7085155353117,1.99770399683788,0.467654378687152,4.271  
75300367345,1.93942322969399e-05,0.00206180752315399  
"145","AC022893.2",8.67060703287725,4.62991870682249,1.08382931039101,  
4.27181537021929,1.93888078124689e-05,0.00206180752315399  
"146","IGFBP6",13491.9701857389,-0.88529428550138,0.207559845576844,-4  
.26524833375645,1.99679978974808e-05,0.00210826498349087  
"147","EVA1C",33.0784112897264,-1.33835158260418,0.314804358923921,-4.  
25137563907627,2.12461473852806e-05,0.00222795484315714  
"148","PPP1R9A",22.6489550193732,2.00157447804667,0.471928531979983,4.  
24126608672934,2.22262448781091e-05,0.00231498354591927  
"149","APBB2",148.259450398294,1.06393463103137,0.251304739791585,4.23

364331255242,2.29935537796115e-05,0.00237882974169605  
"150","ABCA6",1003.22872661286,1.05386292560014,0.24989039918864,4.217  
30058066211,2.47244306886622e-05,0.00254084732710485  
"151","ADAMTS15",74.86135479393,2.19590310704635,0.523097724038935,4.1  
9788312228042,2.69421610356864e-05,0.00275041994943779  
"152","SH3BGRL3",4316.24412436569,-1.07725303737,0.256970381568556,-4.  
1921291893424,2.76348543744289e-05,0.00278425673321452  
"153","RBMS3",950.992661319101,0.79535602840236,0.189676976146455,4.19  
321334914282,2.75030552286568e-05,0.00278425673321452  
"154","MAZ",465.585531898126,-0.754732443447332,0.18025270546257,-4.18  
707969741989,2.82566625983803e-05,0.00282841853216904  
"155","RGS22",34.2326930852895,-1.27281135044161,0.30592794531673,-4.1  
6049390036552,3.17560098630451e-05,0.0031382171004176  
"156","PLP1",175.232756050316,0.906686010212512,0.217928544304748,4.16  
047385212933,3.1758797726335e-05,0.0031382171004176  
"157","BAALC-  
AS1",8.94300089871306,-2.61398282155695,0.631194892382026,-4.141324419  
93028,3.45306149794398e-05,0.00339037853444627  
"158","CDKN2C",255.147339079625,-0.994206139936763,0.241148259803381,-  
4.1228003915408,3.74294025990117e-05,0.00365173570293522  
"159","KANK4",10.8079066262043,3.43492840888657,0.835261758776203,4.11  
239754818814,3.9157125667318e-05,0.00379627101988495  
"160","FAM43A",234.956495221491,1.2428842161819,0.302538832868851,4.10  
818077268343,3.9878792244377e-05,0.0038420723902942  
"161","DACT2",28.0937982835795,2.33610895913122,0.56957929170868,4.101  
46399831906,4.10544389050871e-05,0.00393077127777589  
"162","SLC7A4",29.4700750639392,2.21906191132916,0.542022204746852,4.0  
9404244308691,4.23916659142481e-05,0.00403375018560576  
"163","NAV2-  
AS3",4.09194685420289,-4.22481740829353,1.03369786432645,-4.0870911647  
3447,4.3681550558245e-05,0.00413098835494078  
"164","MS4A6A",31.2843907900949,-2.16110857714664,0.528974232304194,-4  
.08547041645663,4.39876051578608e-05,0.00413456666773429  
"165","MYADM",2603.34076831647,-0.899986764056317,0.220899378963741,-4  
.07419327423299,4.61741240844279e-05,0.00431378256219065  
"166","ARHGAP20",334.191162646558,1.19684526009262,0.294668006754258,4  
.0616735874239,4.87221696446559e-05,0.0045244111148938  
"167","SPHK1",26.0150510107016,-2.4344039695432,0.600655051688853,-4.0  
5291516769637,5.05833483583341e-05,0.00466911565834563  
"168","PLEKH01",177.736857753178,-1.0805051357791,0.266830255268409,-4  
.04941011914938,5.1346893375083e-05,0.00468350509690476  
"169","TXN",2198.23693449783,-1.05664469543868,0.260863196641163,-4.05  
057021858158,5.10929743026109e-05,0.00468350509690476  
"170","MAST4",194.432521807482,0.960265391495656,0.237514092905531,4.0  
4298279629913,5.27754943073352e-05,0.00478549555733866  
"171","MEG8",299.55679167622,1.74137766283345,0.431269165433148,4.0377  
9774305099,5.39553409175297e-05,0.00486386889031416  
"172","CSPG4",7.67464120906791,-3.12653317584331,0.774956178518665,-4.  
03446448006867,5.47269675588613e-05,0.00490474537744097  
"173","IFRD2",92.3452416715141,-1.02467737040027,0.254110461405526,-4.

03240923153109,5.52079410907144e-05,0.00491925093591539  
"174","MDGA2",7.84964528452806,4.53821468066699,1.12589002255457,4.030  
7797295957,5.55921238104641e-05,0.00492501487665692  
"175","PRELP",1687.24812487608,0.64876612189268,0.161219660418834,4.02  
411294135743,5.71904682061384e-05,0.00503766324227213  
"176","AFF3",145.148768077914,-1.72505313002297,0.428975930686248,-4.0  
2132848634034,5.78708372131074e-05,0.00506863042977302  
"177","TUBB6",613.89089820258,-0.865190092530419,0.215291363484697,-4.  
01869391566149,5.85216348864288e-05,0.00509667232640847  
"178","KCNIP4",4.71715477603149,-3.98105721333722,0.993705429628546,-4.  
.00627499320938,6.16838302609072e-05,0.00531204605291556  
"179","SLC7A8",78.5083308222626,1.29908652745908,0.324243776310104,4.0  
0651183576349,6.16220387829741e-05,0.00531204605291556  
"180","AIF1L",130.433583074002,1.90122306600589,0.474986189496306,4.00  
269125302784,6.26260058978692e-05,0.00536322156064252  
"181","PCDHA10",3.71853325190884,4.87643215374306,1.21956676937419,3.9  
984954298528,6.37464116959605e-05,0.00539918096864413  
"182","MT-  
C02",29642.9830655043,-0.766114167293854,0.191585216993282,-3.99881671  
10029,6.36599539850821e-05,0.00539918096864413  
"183","SMOC2",1730.45614408706,1.17306965268553,0.293700647628566,3.99  
409964587164,6.49405500339147e-05,0.00547026545777483  
"184","KCNAB1",95.7666983591524,2.9611273638554,0.741801185876634,3.99  
180726619633,6.55716563041033e-05,0.00549340805395518  
"185","WDR81",81.2316848972317,0.79154890616101,0.198658105429943,3.98  
447827964489,6.76285422096067e-05,0.00563510258465452  
"186","SPI1",11.1806011329274,-2.29197617923462,0.575812324988708,-3.9  
8042223094056,6.87929683341958e-05,0.00570130971436359  
"187","PODN",1749.48343129128,0.613360316859051,0.154177783584729,3.97  
826653489267,6.94195285487512e-05,0.00572247076245455  
"188","AL355596.1",4.33604889652049,-5.39418931941958,1.35966925658582  
, -3.96728049361399,7.26974157237046e-05,0.00596080140096227  
"189","MS4A7",20.7992062141057,-2.29798260980505,0.579546641018909,-3.  
96513834635454,7.33533903826208e-05,0.00598276461771482  
"190","CYP26B1",261.560091251333,-1.91741479513459,0.485319217461121,-  
3.95083220723316,7.78799130213422e-05,0.00631852031170521  
"191","CALN1",8.92628026919057,-4.26941457540162,1.08119488613339,-3.9  
4879279411881,7.85463025769355e-05,0.00633922122630084  
"192","MAN1C1",432.158662654897,0.904816197668952,0.229325878828075,3.  
94554771704284,7.96177740503249e-05,0.00637543968843007  
"193","HLA-  
DPA1",235.372802576186,-0.969962757431976,0.245875587501508,-3.9449331  
561883,7.98222419634774e-05,0.00637543968843007  
"194","APBB1IP",431.311068870854,1.1173496630533,0.283526601967147,3.9  
4089886205024,8.1176849559235e-05,0.00645021204100828  
"195","SEC14L2",19.3358097439833,-1.67197070034131,0.425448990311378,-  
3.92989697570472,8.4982265670439e-05,0.00671795705287086  
"196","IGSF10",165.613723877819,1.91680002920882,0.488504800065754,3.9  
2381001978038,8.71594775417811e-05,0.0068549150321763  
"197","AQP7",12.7032913481418,-2.93292653741426,0.748496930250658,-3.9



1842159784419,8.91307106496653e-05,0.00695107959307314  
"198","ACTN1",127.945563996627,-2.00623431893723,0.512054787508806,-3.  
91800715055854,8.92840583476148e-05,0.00695107959307314  
"199","PRR16",18.8212464760599,-1.73136906305002,0.442450000891147,-3.  
91314060246996,9.11034524812157e-05,0.00705708402009015  
"200","AC025280.2",8.87104209771023,4.12220388747942,1.05537268579955,  
3.90592246980171,9.38666065513182e-05,0.00723476869994285  
"201","KLK1",7.89971575883294,-4.54754596228768,1.16531214855177,-3.90  
24273178129,9.52328394416882e-05,0.00726739712868131  
"202","LILRB5",11.4503303429827,-3.247007275682,0.831912425434852,-3.9  
0306380384299,9.49826508050154e-05,0.00726739712868131  
"203","FIGN",50.3729527060034,1.74111524185021,0.446486151088079,3.899  
59517805231,9.63536552550463e-05,0.00728686745207249  
"204","PLAGL1",1128.17333027858,1.03963965896698,0.266615641691672,3.8  
9939484559302,9.64334064367686e-05,0.00728686745207249  
"205","CTNNAL1",101.502145459222,-0.941499375740364,0.241759358330067,  
-3.89436579515968,9.84559824341402e-05,0.0074034096059623  
"206","WLS",167.625380153701,0.866302942574268,0.222804450777092,3.888  
17610937663,0.000101000334465575,0.00750091241244759  
"207","KANK1",166.322614202968,0.843532947409821,0.216976658458395,3.8  
8766678131679,0.000101212441244833,0.00750091241244759  
"208","ATP11A",187.030877718866,0.8106426222804,0.208436476511899,3.88  
915911382776,0.000100592153652147,0.00750091241244759  
"209","CPB1",933.432444576065,1.27507722616821,0.328297762839701,3.883  
90470632234,0.000102792208426656,0.0075790337709948  
"210","MAN2A1",155.586828455705,1.06686219246911,0.274764430986503,3.8  
8282496623994,0.000103249892436517,0.0075790337709948  
"211","SGIP1",7.20409977259691,-3.97293078205732,1.02370606233794,-3.8  
8092923176007,0.000104058119273473,0.00760216070426816  
"212","TRIM47",242.526804103313,-1.07263367399084,0.27678661396742,-3.  
87530906432167,0.000106489452591767,0.00774308920614196  
"213","PDCD4",594.676331010228,0.518677413894962,0.133929189880381,3.8  
7277347349162,0.000107603830680388,0.0077873852109774  
"214","LINC01615",13.4941740400965,-2.54594642467959,0.657631030043928  
, -3.87139035168327,0.000108216333947254,0.00779511583082672  
"215","LINC00882",136.761720006002,1.16333615952573,0.301091571960725,  
3.86372873856952,0.00011166922614646,0.00800642381882642  
"216","S100A10",25215.253541726,-0.927235740644888,0.240328182454187,-  
3.85820643744787,0.000114222154011418,0.00813193876568327  
"217","EMILIN2",557.325026486144,0.6802567284801,0.176338936549309,3.8  
5766604807602,0.000114474908345979,0.00813193876568327  
"218","AC022424.1",15.2007553778023,3.18465903570238,0.826044816265385  
, 3.85531023619333,0.000115582958835665,0.00817298766262281  
"219","EPB41L2",1167.14504385575,0.617148257217719,0.160273233062901,3  
.85060091085522,0.000117828368654725,0.00828239168876242  
"220","SCARA5",4120.15228710846,0.685187777896093,0.177979180771426,3.  
84981982120742,0.000118204746774423,0.00828239168876242  
"221","SCRN1",225.80820914472,0.60016592651108,0.156321400937761,3.839  
30749667497,0.000123381825004187,0.00856725600197992  
"222","EBF2",327.720063820624,0.995634025709284,0.259293874784061,3.83

978999325936,0.0001231395991388,0.00856725600197992  
"223","MBP",541.924523824948,0.563135831524082,0.146911284788831,3.833  
16933299936,0.000126502809494558,0.00874457761595792  
"224","TMEM37",384.590917800015,1.65973667846907,0.433180414508405,3.8  
3151366700783,0.00012735729831726,0.00876434264982397  
"225","MRC1",13.7767703298569,-2.20109332557021,0.5776446739606,-3.810  
46242576512,0.000138707093833034,0.00950297711749432  
"226","VEPH1",11.9380498220471,3.05280260252412,0.802125295065093,3.80  
589244760868,0.000141293776953069,0.00963736093686531  
"227","AIF1",48.7669495418486,-1.41063472203561,0.371110771084941,-3.8  
0111500916996,0.000144046418294404,0.00978183056391296  
"228","GALNT13",32.5355151496592,-2.23094509644368,0.587191699844236,-  
3.7993471246877,0.0001450777709719,0.00980865719092915  
"229","LRRFIP2",230.388657847166,-0.542457024985636,0.142901783451126,  
-3.79601298097978,0.000147041802256283,0.00989803223484982  
"230","MME",313.627721392838,1.03377285591715,0.272439849428116,3.7944  
9943937041,0.000147941616166529,0.00989894726634595  
"231","ABCA9",1008.79925888141,0.95052990273974,0.250546086717395,3.79  
38325646726,0.000148339722252735,0.00989894726634595  
"232","CCDC71L",1003.32428621327,-1.45963640339359,0.385115476304687,-  
3.79012658073184,0.000150570534682364,0.0100045034143476  
"233","LRRTM4",5.23723971197816,5.35329682381696,1.41438055937918,3.78  
490554633096,0.000153766968196522,0.0101730378315425  
"234","NRN1",239.903639297398,-1.02890600253429,0.272100445912018,-3.7  
8134625647391,0.000155982541520114,0.0102755165706519  
"235","PDLIM4",304.647594802191,-0.961493849958914,0.254346908460889,-  
3.78024586882983,0.000156673564420259,0.0102771191299502  
"236","YDJC",28.9697966651043,-1.26181277882191,0.334067900645732,-3.7  
7711470148105,0.000158655676319142,0.0103630391968626  
"237","S100A4",18918.8655103305,-0.804135591061432,0.213096598698853,-  
3.7735730930076,0.000160926042374895,0.0104386194665218  
"238","IL6ST",1806.87185982806,0.916698155784743,0.242949807172954,3.7  
7319976686441,0.000161167138049444,0.0104386194665218  
"239","NEGR1",1410.95077460356,0.80696528357518,0.214613288828483,3.76  
009001110877,0.000169852231577008,0.0109551135973204  
"240","FSTL3",240.301299762784,-0.810990045278144,0.215857713921798,-3  
.75705843698481,0.000171922360427013,0.0110424299415933  
"241","SERTAD4",34.8993970788356,-3.5087694531734,0.934839789942981,-3  
.75333772794097,0.000174495506794405,0.0111150753604783  
"242","MAP1LC3C",9.61219563766933,2.27918362036396,0.607148013811138,3  
.75391760908062,0.000174092107480905,0.0111150753604783  
"243","RIPOR3",117.806688970488,1.02833930203492,0.27426222680711,3.74  
947477823171,0.000177205317228358,0.0112412344241775  
"244","DPT",3182.44008060891,-1.09750079709851,0.29288851646426,-3.747  
16226620117,0.000178846398530128,0.0112527234013956  
"245","FRMD6",752.843942558038,1.02455517418602,0.273392850290635,3.74  
7556576907,0.000178565567861296,0.0112527234013956  
"246","AC137936.1",8.73096845335487,-2.44232698456197,0.65208278079887  
4,-3.74542474740683,0.000180088824830586,0.0112848342876564  
"247","APOC1",121.692918618742,-1.65417378474613,0.441785923049655,-3.

74428812336832,0.000180905962465705,0.0112901433660277  
"248","PTPRT",6.62843425808114,-3.00147570897668,0.801943530628229,-3.  
74275194492232,0.000182015886845501,0.0113136084504976  
"249","FZD10-  
AS1",22.240476094838,-2.44833377363835,0.656344794638942,-3.7302554901  
5772,0.000191285700065718,0.0118420444438275  
"250","MMP23B",397.597477285171,1.60955440935159,0.43213001609204,3.72  
469939465805,0.000195548098790998,0.0120094579396941  
"251","ASPH",1109.14073163982,0.725703133021213,0.194824291005612,3.72  
491094039351,0.000195384188642814,0.0120094579396941  
"252","GAB2",68.0274747748764,0.930555402156491,0.250273417652698,3.71  
815517158844,0.000200682991911463,0.0122759060329968  
"253","STAB1",14.8003670955919,-2.36741945586622,0.636977872138507,-3.  
71664316676834,0.0002018872616072,0.0123007594374506  
"254","DYSF",5.14207091617846,-3.23418849950656,0.870900328950001,-3.7  
1361497061995,0.00020431957770715,0.0123999460250225  
"255","PTPRD",263.321442969243,0.893519261878431,0.24152253165313,3.69  
952755862001,0.000216001185500626,0.013057483429381  
"256","CYB5R2",24.2286717673353,-1.14805081487914,0.310682494148893,-3.  
.69525427566878,0.000219666837223214,0.0132272042804525  
"257","AC009236.1",18.0444948051594,2.1277553577257,0.576481637273556,  
3.69093344896261,0.000223432595984957,0.0134016088214323  
"258","EN01",1141.73530819725,-0.692937810792866,0.188247155294576,-3.  
68100017080486,0.00023232084936145,0.0137824221305476  
"259","GNAI1",153.572853427497,-0.921434124617645,0.25033234041285,-3.  
68084332650752,0.000232463817965771,0.0137824221305476  
"260","ABCA8",2168.46217245561,0.991951524939616,0.269429298982156,3.6  
8167652399716,0.000231705276346907,0.0137824221305476  
"261","TXNIP",9584.43596369648,1.03479259881206,0.281249807146721,3.67  
926509642809,0.000233907027886832,0.0138148537734694  
"262","PLXNA4",59.5162972619541,1.38985749950211,0.378012238999483,3.6  
767526447841,0.000236221893469588,0.0138454771400521  
"263","SREBF1",203.048844268005,0.977259611524513,0.265771357575761,3.  
67706896799793,0.000235929268459904,0.0138454771400521  
"264","IFI30",61.7020050654132,-1.12963378724515,0.307614318932131,-3.  
67224058739079,0.000240433166880461,0.0140389290434178  
"265","IRX1",114.617163737136,-0.782353846120626,0.213765194924418,-3.  
6598747817541,0.000252338527423003,0.0146784845291532  
"266","ASIP",23.9664969528436,-1.68140273400941,0.459539662176831,-3.6  
5888490678832,0.000253315064430663,0.0146798936774386  
"267","RHOBTB3",1040.57030936987,0.692950688769067,0.189477352396401,3.  
.65716894396626,0.000255016307646694,0.0147231325182539  
"268","SOD3",3125.99419149269,-1.02485433088593,0.280750559701113,-3.6  
5040886107933,0.000261823201642759,0.0150597188556833  
"269","SNAI2",496.51390165035,0.911236581377125,0.249937505814313,3.64  
585770514216,0.000266501421085291,0.0152718193532705  
"270","PUS7",24.479585677494,-1.25442235167357,0.344326604943882,-3.64  
311770761372,0.000269355586470188,0.0153782087608813  
"271","SELENOM",2594.19777354981,-0.725973922691222,0.199344532586038,  
-3.64180503610195,0.000270733081655684,0.0153998171724073

"272","ID4",390.636142549636,-1.09519405103141,0.301063117183881,-3.63  
775563501689,0.000275024171909084,0.0155863882719799  
"273","IQSEC3",8.06240205375756,3.22289197016028,0.887975948926666,3.6  
2948115211446,0.000283991464976252,0.015978512540706  
"274","FLRT2",424.704841111208,1.02930450521903,0.283597264653482,3.62  
945850862386,0.000284016376007359,0.015978512540706  
"275","EGFR",1302.13281532535,0.667233349176174,0.183992503079136,3.62  
641595722621,0.000287382294138893,0.0160823077783828  
"276","LHFPL6",2684.67671722802,0.500524845226565,0.13804124376179,3.6  
2590796479849,0.000287947904432933,0.0160823077783828  
"277","CCL3",69.4304462159988,-2.0284365780268,0.561064057860541,-3.61  
53386580521,0.000299955241877603,0.0166924550669431  
"278","LDHA",2573.48247197223,-0.633940139704313,0.17542887615434,-3.6  
136590144178,0.000301906054615559,0.0167405821291325  
"279","ESR1",40.8148179115145,1.34955689360421,0.37400036186312,3.6084  
3740065186,0.000308046820861207,0.0169590776556268  
"280","VPS51",352.298316958681,-0.681057839027075,0.18872439938215,-3.  
60874291430645,0.000307684330826209,0.0169590776556268  
"281","AL513534.2",30.1235426239589,1.34708799726695,0.373511484759993  
,3.60655040669645,0.000310294604405719,0.0170220331918653  
"282","COL6A6",267.606577254555,1.61986078135806,0.449428900728522,3.6  
0426483195068,0.000313037741004872,0.0171116197786883  
"283","EHBP1",379.373980665159,0.73090158440143,0.203139750737448,3.59  
802343828854,0.000320644729107031,0.0171172685756312  
"284","FGFRL1",38.7005402898477,-1.26250841456696,0.350417879030616,-3  
.60286529345912,0.000314728651024791,0.0171172685756312  
"285","TFEC",4.75372303215035,-3.07088566966738,0.852822912990027,-3.6  
0084798718734,0.000317180992863397,0.0171172685756312  
"286","ADM",1872.34660514138,1.37559108450668,0.382118715336519,3.5999  
0502766985,0.000318333427690526,0.0171172685756312  
"287","KCNA1",20.4214362539962,-2.26195796401377,0.628141357378572,-3.  
60103333022621,0.000316954936242707,0.0171172685756312  
"288","LASP1",463.28476315113,0.646886079865759,0.179768058998171,3.59  
844837548332,0.000320121376950756,0.0171172685756312  
"289","TYMP",935.312072686625,-0.705310904366637,0.196039225830627,-3.  
59780498713052,0.000320914084875604,0.0171172685756312  
"290","RGL1",209.77338497285,0.687665251517769,0.19145122257325,3.5918  
5615153053,0.000328331076982563,0.017412949269612  
"291","MMP9",8.82307797279489,-2.23467879390063,0.622204510568489,-3.5  
9155029567187,0.000328716719912883,0.017412949269612  
"292","PTMA",5661.4773932743,-0.908308915719836,0.253145808437461,-3.5  
8808593879693,0.000333114499712254,0.0175854794967959  
"293","PTGS1",78.1235539229974,1.20496650992576,0.336053034838702,3.58  
564388654938,0.000336247545713652,0.0176902932326824  
"294","SAA1",6.7729079713768,-2.79686235146651,0.781042762925722,-3.58  
093370072299,0.000342368530172145,0.0179510574578354  
"295","RFX2",106.683622284842,-1.10646826797868,0.309176668616931,-3.5  
7875732644495,0.000345231843969796,0.0180398266942183  
"296","STK3",203.742228543566,0.636254979811771,0.178254038284977,3.56  
937203742101,0.000357837951593147,0.018635378458812

"297", "FCER1G", 42.9334821347993, -1.46955030175981, 0.412035293100208, -3.56656414236441, 0.000361692310714501, 0.0187096878176646  
"298", "CAB39L", 558.729395751602, -0.94736582388381, 0.265562841165704, -3.56738849353053, 0.000360556728408285, 0.0187096878176646  
"299", "NMB", 122.892326539291, -1.12017731397058, 0.31451910372307, -3.56155572335879, 0.0003686638416882, 0.018979234654991  
"300", "C20orf194", 115.871161269932, 0.924044472388994, 0.259486046155054, 3.5610565041206, 0.000369365578754284, 0.018979234654991  
"301", "CPNE2", 58.285811260312, -0.798363630474262, 0.22484525988731, -3.55072475565815, 0.000384171958618911, 0.019674454292726  
"302", "GALC", 128.162370744342, 0.724207725680004, 0.204365751247818, 3.54368440532785, 0.000394577261944528, 0.0201404254730957  
"303", "ZNF185", 18.7870046941855, 1.38769580891954, 0.392293885903554, 3.53738831723904, 0.000404105050297791, 0.0205586777238959  
"304", "RASA3", 170.239452807239, 0.709664708363904, 0.200753854948093, 3.53499915878275, 0.000407776456609214, 0.0206772173639179  
"305", "TGFB1", 171.854343166162, -0.895926389469101, 0.253550297484263, -3.53352529402853, 0.000410056850664284, 0.0207246765671801  
"306", "PLXNC1", 176.918839352062, 1.418646496276, 0.401909959843512, 3.52976198158504, 0.000415933676796029, 0.0209529987836954  
"307", "PPL", 808.242134287124, -1.23336429999151, 0.349805691758654, -3.52585543645887, 0.000422117318957899, 0.0211952393216157  
"308", "SCN2B", 17.6946133575978, 1.55442076104607, 0.441380250167728, 3.52172703798002, 0.000428745359701277, 0.0214581484408935  
"309", "LGALS2", 10.3752273373615, -2.44232923002107, 0.695824095947075, -3.50998081878273, 0.000448139020216951, 0.0223561909276514  
"310", "GLIS3", 65.0693489170801, -1.18840188679421, 0.338803654867323, -3.50764187375605, 0.000452097214599744, 0.0224808985905002  
"311", "PTGFR", 533.837333239241, -1.13848236037958, 0.324746679928968, -3.50575519549147, 0.000455313786117607, 0.0225680450578872  
"312", "ARHGAP12", 375.36004669592, 0.512669176251756, 0.146280305757821, 3.50470402420762, 0.000457115164586691, 0.0225847123785379  
"313", "LGI2", 6.25783076163339, -2.68123105961276, 0.765916628850198, -3.50068265737728, 0.000464068093880766, 0.0227821963922676  
"314", "PRXL2C", 209.277926388561, -0.608998466409081, 0.173952191331875, -3.50095311675149, 0.000463597392952405, 0.0227821963922676  
"315", "PLCB1", 147.55091498228, 0.810471364236774, 0.232384618615303, 3.48762912565421, 0.000487323544431343, 0.0238479124997116  
"316", "STXBP6", 242.982933305584, -0.843276173462172, 0.242096611539106, -3.48322171095714, 0.000495417892568596, 0.0241673000441295  
"317", "SPIN4", 16.6258974591433, 1.52151849194624, 0.437676281989585, 3.4763558240573, 0.000508277433687276, 0.0247163931870327  
"318", "MT-CO3", 43769.9478490436, -0.530293222277869, 0.152845792667779, -3.46946561643669, 0.000521494813145311, 0.0252793790711791  
"319", "CYP11A1", 19.0717625869607, 1.94846642348647, 0.561911269512835, 3.46756957762343, 0.000525187762023621, 0.0253785873090725  
"320", "ANTXR2", 932.079129817146, 0.66565557938974, 0.192217676325461, 3.46302999867015, 0.000534128841547323, 0.0257299877889125  
"321", "SUCNR1", 22.3284324394086, -1.92560585420808, 0.556293776509573, -3

.46149091634668,0.000537192248310301,0.025796942391599  
"322","HLA-  
DQB1",53.6180825414841,-1.61775041462402,0.46858498633208,-3.452416235  
71255,0.000555589948628585,0.0265975747146262  
"323","KCNQ10T1",1616.16717130581,1.27604122105219,0.370043226159524,3  
.44835719409194,0.000564007627006619,0.0269169584220032  
"324","CEBPG",142.340522720337,-0.657526913994097,0.190854279740771,-3  
.44517772872155,0.000570684024888044,0.0271515254433617  
"325","SLC4A4",51.5240404203985,1.70131946958357,0.494065882148899,3.4  
435072953911,0.000574221101574757,0.0272357485562304  
"326","LINC01137",7.02445062575159,-2.20954778323125,0.643178140059684  
, -3.43535895518187,0.000591769418185844,0.027896408505611  
"327","PRTG",20.2723306781224,1.30215314044531,0.379011176935977,3.435  
6589453964,0.000591114603057502,0.027896408505611  
"328","PLGLB1",8.07594986203602,2.44968187033021,0.713434498739738,3.4  
3364650105581,0.000595520289838998,0.0279876380117932  
"329","CFH",5023.01516816897,-0.801342511474098,0.233524883907852,-3.4  
315080177507,0.00060023538690193,0.0280761864814832  
"330","RUNX1T1",862.31605284602,0.826899586630974,0.240998397079578,3.  
43114143766662,0.000601047131942229,0.0280761864814832  
"331","ANKRD33B",63.8834419822549,0.862161184253835,0.252049387261614,  
3.4206041665912,0.000624822021610389,0.0290985844807376  
"332","GRK5",232.642686822644,0.728204212651682,0.213135937774095,3.41  
661861559693,0.000634040358565253,0.0292626710397706  
"333","NOVA2",14.597968375138,2.62992697072495,0.769611698968938,3.417  
21282855797,0.000632658001509053,0.0292626710397706  
"334","PNLIPRP3",2.84674977910268,-4.83266095179503,1.41412735305318,-  
3.41741565309591,0.000632186799500712,0.0292626710397706  
"335","CTXN1",40.9598702957073,-1.02148470540767,0.299150843346527,-3.  
41461415913313,0.000638724211242108,0.0293908469143197  
"336","HPSE2",10.1017622797908,-2.22471351310879,0.652701396017591,-3.  
40847059111979,0.00065328126472201,0.0299712223086005  
"337","ROR1",163.640550135705,1.101553149502,0.323867502572244,3.40124  
631447479,0.000670793565412173,0.0306833317828743  
"338","CTSO",417.403028869474,0.586755150238901,0.17281029624567,3.395  
37147372723,0.000685355434104462,0.0312566686885215  
"339","TEAD1",392.993026994155,0.843659250855074,0.248678726164898,3.3  
9256704369495,0.000692409851702044,0.0314852444365398  
"340","PCSK5",400.042974330135,1.22435754538689,0.361002370815175,3.39  
154987437391,0.000694985130188651,0.0314976582454492  
"341","SEPTIN1",158.802048340401,-0.854756503596231,0.252077567724479,  
-3.3908471559456,0.00069676947529667,0.0314976582454492  
"342","DIRC3",28.9177762706747,1.85636899362492,0.547980597687683,3.38  
765460211229,0.00070492975781488,0.0317733690547262  
"343","CXCL3",95.065775372592,-2.87036928486986,0.848801155954168,-3.3  
8167457093432,0.000720454392642817,0.0323784386664403  
"344","JAM2",88.2727437488381,-1.19648194058231,0.353971924783403,-3.3  
8016056305719,0.000724434956504319,0.0324626885305642  
"345","ANXA5",3989.45353088522,-0.667228723027277,0.197603429652507,-3  
.37660497189054,0.000733863632571772,0.0327898779596924

"346", "RASSF4", 214.884981939645, 0.851954689713895, 0.252540904292931, 3.37353147641257, 0.000742105613867118, 0.0330623064675191  
"347", "PXN", 555.125865726178, 0.776948212114778, 0.23062977409, 3.36881139991745, 0.000754930661706612, 0.0335367612397909  
"348", "IER3", 741.664690923761, -1.39782428540812, 0.415059498883749, -3.36776845046889, 0.00075779211200213, 0.033567141972738  
"349", "CEP152", 82.9586027968501, 0.950084626957712, 0.282429097846988, 3.36397571709286, 0.000768283026971438, 0.033934334844598  
"350", "PPP1R3C", 8.1508356502584, -1.89739926540655, 0.564167549705491, -3.36318398035661, 0.000770489958606068, 0.0339345791768929  
"351", "PCDHB2", 43.5490355907202, 0.984328654590876, 0.292958114039158, 3.35996378806326, 0.000779526892658776, 0.0342347779211824  
"352", "SNX32", 2.55970464858463, 4.27647995062097, 1.27328361214747, 3.35862325551212, 0.000783317799167669, 0.0343035337334364  
"353", "PRUNE2", 20.0963467875675, -1.94656990090254, 0.579927692436024, -3.35657345957363, 0.00078914754035203, 0.034363585690753  
"354", "PRG2", 26.8301584282908, -1.25043870112954, 0.372517969521648, -3.35672048984707, 0.0007887280405783, 0.034363585690753  
"355", "MPEG1", 8.93789918540703, -1.85722607731417, 0.555022598764877, -3.34621703953525, 0.000819222448662609, 0.035572715622913  
"356", "PLEKHG3", 29.2497999844915, 1.06743243614616, 0.319700026664527, 3.33885626248712, 0.000841240811151785, 0.0364261997300696  
"357", "GEM", 372.533140123014, -1.32569963840059, 0.397984368819623, -3.33103443819281, 0.00086523897442212, 0.0373603887695153  
"358", "PLD5", 6.31175671295297, 3.13253671579778, 0.940642155193525, 3.3302108548955, 0.000867802414202042, 0.0373635715809727  
"359", "LRRFIP1", 303.838668771177, -1.04727588164726, 0.314548715785875, -3.3294552770013, 0.000870160376099202, 0.0373635715809727  
"360", "PHLDA3", 353.368197183342, -0.663019887995742, 0.199194644685178, -3.32850257617933, 0.000873141974710115, 0.0373874542782123  
"361", "KCTD11", 41.9198834542084, -0.832735003649815, 0.250352809503634, -3.32624588995367, 0.000880242394342167, 0.0375870817417853  
"362", "IL10", 11.5807379424206, -2.21938602183787, 0.669697390149495, -3.31401324610574, 0.000919671503255474, 0.0391622547587932  
"363", "CKB", 694.397039194937, -0.944865455607021, 0.28541748063291, -3.3104680677294, 0.000931400786304688, 0.0395524603881178  
"364", "AC097518.2", 5.81399059692627, 3.40531511218228, 1.02906222653203, 3.30914401907287, 0.000935816859295313, 0.0396308156209815  
"365", "IGSF3", 61.844536787744, 1.0649769579704, 0.322077766721512, 3.30658327897326, 0.000944412730543645, 0.0398852664146035  
"366", "BATF3", 15.5091727681742, -1.56810144846998, 0.474565531904903, -3.30428853982638, 0.00095217773620587, 0.040103334372572  
"367", "P2RY14", 4.99861857647225, -2.82144209776647, 0.855955107268038, -3.29625008812869, 0.000979847482586317, 0.0410444264784459  
"368", "HPRT1", 45.7163918634766, -1.01067280950151, 0.306564931650102, -3.29676588924084, 0.000978049891386016, 0.0410444264784459  
"369", "NATD1", 66.7804532262459, 0.765907078892937, 0.23253273384322, 3.2937602643477, 0.000988567740842268, 0.0412974843498199  
"370", "PEX11A", 33.9748677612756, -0.998479486655183, 0.303494367501678, -3.2899440436886, 0.00100207308093689, 0.0417485311963302

"371", "CMTM8", 61.4998850619007, 1.13228512650795, 0.34482959065889, 3.283  
60777955401, 0.00102487447597349, 0.0425833963534539  
"372", "KCNMA1", 31.4383828254458, -1.59414742403677, 0.485792565451628, -3  
.28153935940691, 0.00103242114404879, 0.0427816449879357  
"373", "REEP5", 962.953114535427, -0.589323573661595, 0.179717953926113, -3  
.27915804062561, 0.00104117309708616, 0.0429135916887249  
"374", "TPP1", 363.327997195597, 0.670460432246017, 0.204451481589872, 3.27  
931315064253, 0.00104060094459887, 0.0429135916887249  
"375", "CLU", 4254.13640086184, -1.36841667741179, 0.417580996121322, -3.27  
700898777063, 0.00104913029765964, 0.0431262494357958  
"376", "AKAP12", 900.143681244493, 0.77596290258098, 0.236920770353035, 3.2  
7519998109377, 0.00105587200261936, 0.0432006994000507  
"377", "ADAMTSL5", 13.3078217916722, 1.67824398961767, 0.512437847302117, 3  
.27501959204085, 0.00105654645954065, 0.0432006994000507  
"378", "SMS", 312.153601067032, -0.646724102942062, 0.197839605220859, -3.2  
6893142664782, 0.00107954461088516, 0.0440242861819966  
"379", "STRBP", 22.5445455320298, 1.17551958955876, 0.36007773454489, 3.264  
62726456699, 0.00109608210586691, 0.0445807537254313  
"380", "TTC28", 240.877236278024, 0.577387244169331, 0.176960404172191, 3.2  
6280473233721, 0.00110315500934907, 0.0447503538660946  
"381", "COL13A1", 3.51195104949024, -4.39388468299017, 1.34729844955316, -3  
.2612556515948, 0.00110919985583916, 0.0447599889470174  
"382", "SNHG14", 174.043745081173, 0.990201235648337, 0.303584013545444, 3.  
26170414602583, 0.00110744659142904, 0.0447599889470174  
"383", "POLG2", 91.1884558777295, 1.44212807110208, 0.443126315729723, 3.25  
444014474121, 0.00113616099407988, 0.0457282551533719  
"384", "MIR4435-2HG", 217.828603810226, 0.813909696616381, 0.2502117070673  
63, 3.25288415220819, 0.00114240061750554, 0.0458596497886666  
"385", "SNX18", 275.344157602214, 0.502755025002595, 0.154661636757356, 3.2  
5067699749843, 0.0011513057842429, 0.0460970874392321  
"386", "KIFC3", 28.650153975579, -1.20514655766616, 0.370998881878857, -3.2  
4838326078751, 0.00116062823201804, 0.0463499590584406  
"387", "HRCT1", 225.519187782705, -1.40931282933925, 0.434140837691846, -3.  
24621115311796, 0.00116952060730345, 0.0465843931823841  
"388", "DOCK4", 138.811809807245, 1.09883968271278, 0.338874032049575, 3.24  
261990824964, 0.00118436098783955, 0.04705392945244  
"389", "ZNF221", 9.66810451434483, 1.79975595665572, 0.555651406672977, 3.2  
3900189046934, 0.0011994877842533, 0.0475324015276727  
"390", "PCYOX1", 776.658825380781, 0.622452663038398, 0.192239965404659, 3.  
23789416903065, 0.00120415469218055, 0.0475835183887808  
"391", "LRRN4CL", 870.969918780126, 0.613872784570822, 0.189642988020955, 3  
.23699173366215, 0.00120796910832617, 0.0475835183887808  
"392", "ITGB2", 35.2020492848235, -1.16206989389497, 0.359051044265806, -3.  
23650331186529, 0.0012100382230556, 0.0475835183887808  
"393", "PATZ1", 65.0991293833741, 0.681460295933478, 0.210616229912396, 3.2  
3555452595902, 0.00121406695065714, 0.0476204632172514  
"394", "GASAL1", 36.5331054078451, -1.84522615835199, 0.570562988236895, -3  
.23404461276738, 0.00122050388799641, 0.0477514401864587  
"395", "NFIA-  
AS2", 9.59579589833233, -1.98663648811264, 0.614445849466876, -3.233216547



61986,0.00122404739666224,0.047768837011515  
"396","CCDC168",4.01540212938937,-2.72824783266753,0.84422329477403,-3  
.23166613567301,0.00123070758009664,0.047907468048459  
"397","FAM171A1",127.012000090471,0.676927797211725,0.2097964892675,3.  
22659258777496,0.00125273694156065,0.0486421661313789  
"398","FPR3",5.01444667838747,-2.83247476371752,0.878093622479166,-3.2  
2570929933468,0.00125660919183613,0.0486699263621959  
"399","SULT1A2",4.57100544846156,3.68030548817326,1.14235415215548,3.2  
2168522014734,0.00127439061666629,0.0492349156789747  
"400","CMKLR1",61.4905026255467,-1.6872142559547,0.524352192100037,-3.  
2177118382921,0.00129217566926827,0.0496051295451102  
"401","RHOJ",79.9614597184282,1.0306304179135,0.320280597967125,3.2178  
9838177861,0.00129133559234717,0.0496051295451102  
"402","LYL1",6.0766386006339,-2.11769660050785,0.658203305344663,-3.21  
738979934009,0.00129362712144887,0.0496051295451102  
"403","EBF1",2204.63996758919,0.532276169263458,0.165504834293508,3.21  
607626469395,0.00129956291428361,0.0497090876518161  
"404","PTMS",1956.67845302005,-0.639127895189711,0.198920443769235,-3.  
21298245207595,0.00131364315346543,0.0501232901254199  
"405","RBP7",7.86866635396732,-2.03419197427092,0.63503526297052,-3.20  
327404301224,0.00135874618288086,0.0515545914006616  
"406","FCGR2A",25.5441470306221,-1.64001433013896,0.512076623840829,-3  
.20267368941398,0.00136158165031866,0.0515545914006616  
"407","APBA1",24.8887229240597,1.15266663194819,0.359977704628154,3.20  
205006345839,0.00136453281164255,0.0515545914006616  
"408","PTGDS",1478.74477196471,3.00677521355708,0.939007880483977,3.20  
207665563717,0.00136440685015714,0.0515545914006616  
"409","ISYNA1",35.834810386153,-0.933348297892623,0.291687972205164,-3  
.19981756819282,0.00137514599682067,0.0518285465549892  
"410","SMYD2",52.4975698938553,-0.825080288209015,0.258135621570089,-3  
.19630542731968,0.00139199675723418,0.052335682957963  
"411","TGFB3",2137.4463175047,0.629864003441913,0.197151168922454,3.1  
9482763852981,0.0013991437304529,0.052349030594494  
"412","EXOC4",155.373266723589,0.544045695834044,0.170262463827766,3.1  
9533550497888,0.00139668374819243,0.052349030594494  
"413","SCARB2",755.257169666357,0.510826417883981,0.160020341359054,3.  
19225926870003,0.00141164559691034,0.0526889028483605  
"414","NR2F2-  
AS1",30.2355753943287,1.40905761156355,0.44196053215072,3.188197834559  
18,0.00143162550705934,0.0533055729258932  
"415","RGP2",5.77052637348862,3.86931717496874,1.21733418578847,3.178  
51681168599,0.00148030633302276,0.0548531781816005  
"416","HAS2",395.672921388182,-1.1667864638829,0.367059084903134,-3.17  
874291053391,0.00147915221428679,0.0548531781816005  
"417","ATM",245.314720367562,0.645703362318178,0.203264093857485,3.176  
67203323623,0.0014897540322924,0.0550708834719121  
"418","HDGF",365.970866952468,-0.533298711104431,0.167958009765727,-3.  
17519070301137,0.00149738057949931,0.0552203866817747  
"419","TEDC1",38.0882676627026,-1.12391399793066,0.354191832025459,-3.  
1731787588198,0.00150779657463128,0.0554717999950864

"420", "OLFM2", 22.6729722873428, -1.62913830556749, 0.513858778962692, -3.1704008421461, 0.00152228779275205, 0.0558715864887449  
"421", "DDIT4L", 31.0379390019192, -1.66934509138914, 0.526700887732862, -3.16943663902807, 0.0015273475502795, 0.0559241389253169  
"422", "NLGN1", 36.5330441332983, 1.01123169437078, 0.31917548605074, 3.16826240913132, 0.00153353036310916, 0.0560174657519615  
"423", "CYP2U1", 130.818323738752, 0.577501706189871, 0.182327362447405, 3.16738913149396, 0.00153814347385192, 0.0560531481073934  
"424", "ZEB1", 867.504208047144, 0.646429055657099, 0.204245161708388, 3.16496630936131, 0.00155100909190763, 0.0563886913956511  
"425", "C3AR1", 5.12154669298651, -2.69538124026841, 0.852182888007664, -3.1629140624614, 0.00156198433380223, 0.0566540906013208  
"426", "FSTL1", 9606.13315390265, 0.922804338942871, 0.291892243653358, 3.16145549944371, 0.00156982802975794, 0.0568049274148327  
"427", "ATP6AP1L", 19.3483062857865, 1.45249198449542, 0.459940006354139, 3.15800314047272, 0.00158853846602368, 0.0573473546926349  
"428", "MT-ATP6", 54678.3065933, -0.574137606179387, 0.181933405802738, -3.15575693010386, 0.00160082205999202, 0.0576557758289182  
"429", "HABP4", 117.270493628444, -0.663378847541003, 0.210318223420559, -3.15416722693825, 0.00160956825999975, 0.0578356520463781  
"430", "PLA2G7", 48.9969965422903, 1.56785099987584, 0.49764206258735, 3.15055964466556, 0.00162957979734719, 0.0583106509970709  
"431", "CD209", 3.40218058361341, -3.90751809008698, 1.24031613033996, -3.15042108580493, 0.00163035294062521, 0.0583106509970709  
"432", "N0X4", 198.408351465434, 0.846944688337089, 0.269338342073159, 3.14453813674637, 0.00166349227727169, 0.0593581792919979  
"433", "ARHGEF4", 40.4739839696842, 0.962209212965312, 0.306558190455426, 3.13874899749324, 0.00169670715103844, 0.0602643795697177  
"434", "GTF3A", 527.035677051651, -0.761382466821528, 0.242567480626728, -3.13884806345156, 0.0016961336718218, 0.0602643795697177  
"435", "PHYHIP", 34.8645105004714, -1.17863531522376, 0.375740946397448, -3.13682958039137, 0.00170785365631299, 0.0605208370392294  
"436", "PLAT", 229.654183812105, 0.832698229654675, 0.265643716715788, 3.13464304727214, 0.00172063340532771, 0.0608338622548775  
"437", "DNASE1", 58.5926063581836, 1.0856876877477, 0.346681525583852, 3.13165717705688, 0.00173822715351973, 0.0613152667540199  
"438", "AVL9", 75.5006453716192, 0.786687150280982, 0.251447162277428, 3.12863801347263, 0.00175618514310053, 0.0618072921938235  
"439", "PRDM6", 54.7190601653708, 1.21282842892613, 0.38784350128685, 3.12710777646656, 0.00176535198643916, 0.0619883846718897  
"440", "AQP1", 97.349325763063, -2.31918098725385, 0.742329542025847, -3.12419330763089, 0.00178293281391321, 0.0623652627561853  
"441", "DHRS4", 106.568950997464, -1.17784045613593, 0.377031027337434, -3.12398813554882, 0.00178417650830215, 0.0623652627561853  
"442", "CLCA2", 4.14365972906187, 4.27695526144577, 1.36988356085493, 3.1221305106958, 0.00179547324761893, 0.0624767948353178  
"443", "DSTN", 3856.22696839197, -0.470764781585403, 0.15078217593316, -3.12215139934105, 0.00179534585324558, 0.0624767948353178  
"444", "MLIP", 8.7216751440463, -2.78975489780817, 0.89457378547823, -3.118

52967647246,0.00181755837133974,0.0628198706148029  
"445","AL512625.1",16.9981545893195,1.27178455184354,0.407715672312475  
,3.11929277731773,0.00181285727648005,0.0628198706148029  
"446","GALNT16",441.752094686753,0.668425746618413,0.214333005352256,3  
.11863189488644,0.00181692800401212,0.0628198706148029  
"447","DDX11",23.3822415697957,1.46049827574344,0.468558381233275,3.11  
700384464218,0.00182699189516711,0.0630046533870267  
"448","AC108463.3",25.1484075621574,1.70324607615728,0.546922260363947  
,3.11423798150739,0.00184420674916178,0.0634563549962699  
"449","FM03",22.8168462676283,1.70143374947464,0.546630290312538,3.112  
58592805356,0.00185456016964386,0.0635214654038629  
"450","PDE7B",45.2084820605302,1.28103178183971,0.411600656429338,3.11  
231714971676,0.00185624964559992,0.0635214654038629  
"451","ULBP2",8.98657291269727,2.26704012715992,0.728562004713868,3.11  
16639524048,0.00186036138213014,0.0635214654038629  
"452","TMOD3",610.701295908797,-0.564209362999126,0.181341316145864,-3  
.11131172415943,0.00186258205400882,0.0635214654038629  
"453","TMOD2",233.059998980303,0.684277190466184,0.220195631802244,3.1  
0758748875059,0.00188621146299979,0.0641853194307766  
"454","CACHD1",131.892560658621,0.760308903470608,0.244850948541998,3.  
10519076196348,0.0019015634247211,0.0645651986609599  
"455","GDF10",401.651909474479,-1.23758384513693,0.399287210766742,-3.  
09948280777745,0.00193858828343697,0.0656776667894085  
"456","KLHL24",278.809378114333,0.770782400179331,0.248733652983784,3.  
09882635877013,0.00194288853813708,0.0656790061740857  
"457","CCND1",360.153314898719,-0.902366958033733,0.291743236006662,-3  
.0930175807508,0.00198132397232031,0.066831748431767  
"458","SRSF8",186.922219734578,-0.471204952447493,0.152645597961601,-3  
.08692133110861,0.00202241111789607,0.0680687060750391  
"459","ZNF528",37.9417837378386,0.950719912283104,0.308266448015145,3.  
08408494795514,0.00204179286347262,0.0685713224192384  
"460","LGALS1",101.231954431017,-0.824056705943595,0.267492181083468,-  
3.08067586351789,0.00206531347967717,0.0688099727264562  
"461","ABRACL",108.878258268641,-1.00910676134218,0.327409537176974,-3  
.08209336246895,0.00205550356979149,0.0688099727264562  
"462","C6orf120",192.517612754546,0.600973073557018,0.195092798335809,  
3.0804472470715,0.00206689965333368,0.0688099727264562  
"463","SEMA3C",2238.49987646123,1.1982919035687,0.388947924130074,3.08  
085434894354,0.00206407589852899,0.0688099727264562  
"464","MEG3",3586.45396955614,1.18108673080341,0.383556049123318,3.079  
30674930818,0.00207482929641401,0.0688099727264562  
"465","KCNN4",3.2558575650972,-2.77973149733891,0.902749293111057,-3.0  
7918435223515,0.00207568195379839,0.0688099727264562  
"466","MUC20",29.6999598127674,1.85910074983342,0.604449901178461,3.07  
569038593412,0.00210015801195144,0.0691791844605786  
"467","NRBP2",119.594358743406,0.68407089125084,0.222413423959345,3.07  
567267781409,0.00210028273289334,0.0691791844605786  
"468","RNF24",211.742953249047,-0.862721378184489,0.280419691887381,-3  
.07653636011755,0.00209420759673768,0.0691791844605786  
"469","ERLIN2",142.623589479698,0.674186823149808,0.219458797105349,3.

0720428255431,0.00212599221240602,0.0697208532201387  
"470","TMEM245",198.216353291244,0.749435679459043,0.244051798686823,3  
.07080580225819,0.00213481950826503,0.0697208532201387  
"471","KCTD12",794.349487374744,1.12543389576258,0.36648457633439,3.07  
089020503745,0.00213421615037962,0.0697208532201387  
"472","MT-  
ND4",33371.6493626764,-0.559748241861778,0.182251118642094,-3.07130209  
148958,0.00213127400027917,0.0697208532201387  
"473","AC007563.2",42.5560103535869,1.1898314745881,0.387558989173066,  
3.07006548119769,0.00214011844022076,0.0697461432473638  
"474","SLC25A48",5.96553522608306,-2.52892446298377,0.824796050470583,  
-3.06612096595383,0.0021685556199522,0.0705238077670109  
"475","KLF15",14.5779923496834,1.51173977982252,0.493436056352345,3.06  
36994608741,0.00218618413826846,0.070947428402965  
"476","SCIN",120.26267065016,3.13101440736188,1.02259449074277,3.06183  
383120678,0.00219985537335782,0.0711200422084849  
"477","MSANTD3",111.348094625524,-0.694067799434368,0.226692507457066,  
-3.06171477487328,0.00220073046600372,0.0711200422084849  
"478","TNFSF14",32.0956963213764,1.44093913297595,0.470770135834733,3.  
06081253523227,0.00220737252171463,0.071185454858224  
"479","LIFR",181.486846058441,0.931330235672695,0.304385901685797,3.05  
970227436507,0.00221557118943042,0.0713006886953443  
"480","ALPL",467.164072465515,2.55845595774974,0.836744852931022,3.057  
62975271106,0.00223095033775104,0.0716432841947478  
"481","TRIP10",558.493429347244,-0.500288652043492,0.163652530579636,-  
3.0570175130903,0.00223551214386466,0.0716432841947478  
"482","LAMC2",44.6327208799169,0.962827222224913,0.315385165824208,3.0  
5286147402881,0.00226670548792457,0.0723421637605741  
"483","SIGLEC1",4.9762836308705,-2.93092204960662,0.959880332811293,-3  
.05342442116982,0.0022624570406728,0.0723421637605741  
"484","CYP1B1-  
AS1",32.9880798216549,1.24331852613535,0.407384575840838,3.05195287172  
853,0.0022735779446477,0.0724115785469924  
"485","C5AR1",29.6355526437448,-1.45200779122086,0.476331951668374,-3.  
04831071301251,0.00230131843523832,0.0731439663488634  
"486","IGFBP5",15721.54900366,1.09671557983296,0.360137837623838,3.045  
26618771581,0.0023247445680886,0.0735850873040776  
"487","GAS2L1",127.833453147142,-0.753676445701855,0.247458888587131,-  
3.04566326150165,0.00232167694467548,0.0735850873040776  
"488","DMTF1",116.418392261275,0.851091990981578,0.279593737546293,3.0  
4403095166128,0.00233431122758631,0.0737364909287767  
"489","KCNIP4-  
IT1",3.94046965979674,-2.68329473653807,0.88317125571484,-3.0382496250  
5851,0.00237956750823207,0.075012337708379  
"490","CDH13",66.2435487716698,-2.54757722514499,0.839280600663489,-3.  
03542965622107,0.00240193245783789,0.0755628343623899  
"491","AKR1C1",1325.71704681536,-0.951890896825596,0.313845813804681,-  
3.03298898680865,0.00242144437100825,0.0760215172690268  
"492","DUXAP8",321.99423345181,0.850472878276482,0.280902194909714,3.0  
2764767840222,0.0024646525453371,0.0772207702975029

"493", "ENHO", 3.65914849515809, -2.51321499529871, 0.830281097953835, -3.0  
2694473172078, 0.00247039122238021, 0.0772435713853771  
"494", "GNG4", 6.69631223697876, 2.21294257737478, 0.732159107576845, 3.022  
48862914338, 0.00250705501505501, 0.0781976288274468  
"495", "NID2", 286.969890812696, 1.05155266885673, 0.347965028389193, 3.022  
00676235943, 0.00251104938498775, 0.0781976288274468  
"496", "FAM117B", 60.4276487560109, 0.923968144138516, 0.3058967838921, 3.0  
2052258406362, 0.00252338888922621, 0.0783094283234409  
"497", "ENPEP", 28.5671151565039, 1.80044653534409, 0.596104607479924, 3.02  
035332851328, 0.00252479960277328, 0.0783094283234409  
"498", "PLPP3", 3662.29339863313, 0.741290642478675, 0.245625098620854, 3.0  
179759586496, 0.00254469091454993, 0.0786731426497248  
"499", "LINC02518", 5.81059973753536, 2.31134342034843, 0.765920505261052,  
3.01773278619907, 0.00254673358301737, 0.0786731426497248  
"500", "SPATS2L", 383.890986155859, -0.506370906215908, 0.167867939500492,  
-3.01648371763342, 0.0025572495154039, 0.0788400025599023  
"501", "EMP3", 2698.94305662566, -0.638421999501647, 0.211743982411394, -3.  
01506561004066, 0.00256923671637412, 0.0790514650357426  
"502", "OLA1", 176.033423078565, -0.620360205416201, 0.205878093701227, -3.  
01324047771919, 0.00258474009927648, 0.0792448409371741  
"503", "STARD10", 70.363215525403, -0.857011764965584, 0.28442710132172, -3.  
.01311570164407, 0.00258580311329216, 0.0792448409371741  
"504", "TRMT9B", 24.6399021896426, 1.30836830012989, 0.434376274083139, 3.0  
1206207197097, 0.00259479533036935, 0.0793626389238958  
"505", "SERPINB8", 50.2969863794525, -0.930647225465871, 0.309209891146724,  
-3.00975891170399, 0.00261455132405439, 0.0798085320005911  
"506", "GAB1", 122.292341643237, 0.60883717391767, 0.202469157495825, 3.007  
06132947792, 0.00263786538238561, 0.0802592051962639  
"507", "PSD", 3.65680117550562, -2.60857218325421, 0.86754412869208, -3.006  
84668016476, 0.00263972864317261, 0.0802592051962639  
"508", "TCEA3", 197.707365789589, 0.826689071938664, 0.275021764335704, 3.0  
0590418338518, 0.00264792422189701, 0.0803465831478004  
"509", "BCL7A", 57.9472871991186, 1.13072954381817, 0.376242805876921, 3.00  
531870950394, 0.00265302697516902, 0.0803465831478004  
"510", "DPY19L3", 90.0075190148026, 0.734144920072042, 0.244338364150172, 3.  
.00462402875396, 0.0026590931894384, 0.0803723951278293  
"511", "ART5", 3.96938003073297, -3.16065567597706, 1.05256809660056, -3.00  
280398597003, 0.00267504665565147, 0.0806963682913256  
"512", "FTX", 600.730805719719, 0.971883742643423, 0.323971601666387, 2.999  
90412012788, 0.00270064603561385, 0.0813094895292726  
"513", "SCARA3", 381.69413342339, -0.703604719111741, 0.234652316317204, -2.  
.99849892877514, 0.00271313110123394, 0.0813675407111306  
"514", "INO80C", 57.8427290811211, -0.860095848383695, 0.286811436724898, -  
2.99881991529046, 0.00271027451116214, 0.0813675407111306  
"515", "MATN2", 113.751011536749, -1.11509381200794, 0.371965693426433, -2.  
99784047753447, 0.00271899953911642, 0.0813851997970479  
"516", "SASH1", 1055.03901917148, 0.831457022779893, 0.277409968442879, 2.9  
972139337563, 0.00272459436797452, 0.0813946166324171  
"517", "UBXN11", 58.613985283274, -0.847734788779477, 0.282899752413077, -2.  
.99659077658595, 0.00273016938672192, 0.0814034063758575

"518", "CCL4L2", 51.9178656484687, -1.70572807556038, 0.569479558107668, -2.99524021762671, 0.00274228782660963, 0.0816068858053811  
"519", "DPY19L4", 143.326248593425, 0.562469758262638, 0.18808351191877, 2.99053198509798, 0.00278491961777904, 0.082713490615045  
"520", "ADGRD1", 389.000374224765, 0.971490669638281, 0.324918393488274, 2.98995282848874, 0.00279020532726717, 0.082713490615045  
"521", "NHSL1", 281.053343938247, 0.586287763770595, 0.19615855354674, 2.98884628363094, 0.00280032976317169, 0.0828456948299824  
"522", "GTF2A1", 153.457295253846, 0.536904467675492, 0.179669344791161, 2.9882920110805, 0.00280541373345772, 0.0828456948299824  
"523", "GNS", 407.517509841133, 0.693224407911785, 0.232614354492408, 2.98014458060631, 0.0028811236365028, 0.0849187779286628  
"524", "KCTD7", 47.7198973992199, 0.873212056102371, 0.293404345713354, 2.97613879569279, 0.00291902718649736, 0.085871763511177  
"525", "TTC27", 80.8244089291515, 1.02386291255735, 0.344476424512619, 2.97222927231074, 0.00295645817976494, 0.0859966816210965  
"526", "TFPI", 1180.0995042559, 0.542699569439506, 0.182431805839429, 2.97480785733806, 0.0029317211678376, 0.0859966816210965  
"527", "C3orf80", 2.66775239613848, -4.06135618852296, 1.36646229105096, -2.97216850777444, 0.0029570433993529, 0.0859966816210965  
"528", "CDK6", 134.812928636704, 0.915624187906787, 0.308122841309864, 2.97162061733031, 0.00296232487452496, 0.0859966816210965  
"529", "RASL12", 46.4343308301217, -1.29105751877896, 0.434188242337635, -2.97349719059182, 0.00294427101948174, 0.0859966816210965  
"530", "ABCA10", 402.367754863009, 1.00869004554014, 0.339179982114185, 2.9739079507368, 0.0029403326583972, 0.0859966816210965  
"531", "MARCH2", 343.033804820968, -0.933822787759586, 0.31420232539369, -2.9720428917562, 0.00295825353479251, 0.0859966816210965  
"532", "SERGEF", 79.2326523420979, -0.792353101826392, 0.266712602033282, -2.97081238676348, 0.00297013165370769, 0.0860612395524511  
"533", "CCDC18-AS1", 186.470396974694, 0.693253186128093, 0.233497694807223, 2.96899370548582, 0.00298776716609079, 0.086247997875074  
"534", "PMS2", 49.3664421309891, 0.773044945351608, 0.26032619688307, 2.96952421464842, 0.00298261304512314, 0.086247997875074  
"535", "CCNG2", 407.717363860479, 0.710817664999838, 0.239543408585468, 2.9673856158151, 0.00300344012353817, 0.086376920717054  
"536", "SNHG18", 84.4083273754541, -0.911545961717136, 0.307144605092751, -2.96780717161504, 0.00299932426816337, 0.086376920717054  
"537", "FM04", 45.1898411129825, 0.954859311317576, 0.322089196348182, 2.96458037755902, 0.00303096051918714, 0.0870060640656792  
"538", "LINC01151", 7.71551739982644, -2.75685065084593, 0.930537298245177, -2.96264390051301, 0.00305009203568619, 0.0873925069332763  
"539", "CAPS", 92.2983124656196, -1.19714657119159, 0.404217210949595, -2.96164175785397, 0.00306003593817611, 0.0875147569331814  
"540", "WDR76", 13.1875137794144, -1.57676743799948, 0.533230367599966, -2.95700982878451, 0.00310638215713011, 0.0886757054669643  
"541", "RAB30", 275.579872650513, 0.508025600909641, 0.17203897814766, 2.95296802143062, 0.00314734565491754, 0.0896789894095266  
"542", "SERP2", 40.3553059753146, -0.939888720004393, 0.318537019691462, -2

.95064203499731,0.00317114203386968,0.0901903218673453  
"543","IL6R",146.150877242151,0.781535836771988,0.265308317867668,2.94  
576454689901,0.00322157527893285,0.0912878362587315  
"544","NCEH1",38.7557661647392,-1.07611308870496,0.365277733052685,-2.  
94601337922163,0.00321898476303993,0.0912878362587315  
"545","TNFRSF19",32.7202716636111,1.19400278585738,0.405539552640382,2.  
.94423263546916,0.00323756542372241,0.0915726073517082  
"546","AC083837.1",2.92425361273909,-3.15629591703101,1.07273711465522  
,-2.94228275866586,0.00325802289986784,0.0919824597096386  
"547","JAG1",311.290226687417,0.760723486526395,0.258603107507869,2.94  
166413488766,0.00326453786713868,0.0919978998572992  
"548","PCDHB12",25.4970325096277,1.20766736874735,0.410675413760336,2.  
9406858270121,0.0032748650366593,0.0921205192337648  
"549","ITGA7",11.5756020294241,-1.7182815705276,0.585248820497031,-2.9  
359846792486,0.00332490743485633,0.0933578289768857  
"550","ASIC1",41.2655713136441,0.906581639280467,0.309173416711621,2.9  
3227551360301,0.00336488088689794,0.094308434311876  
"551","SVEP1",1491.56752495212,1.13144351403924,0.385987320566229,2.93  
129710162359,0.00337549786366498,0.0944343004871064  
"552","ARHGEF10",430.828279291299,0.7896361290517,0.269544258584881,2.  
92952308907384,0.00339482590993958,0.0948029735538381  
"553","PAK3",104.869406705833,0.982560750564043,0.335505519980681,2.92  
859786813827,0.00340494621524874,0.0949136454033622  
"554","CYGB",813.695853541965,-0.718518553687043,0.245702012169718,-2.  
92434948880569,0.00345176961610139,0.0960451780364674  
"555","DDX60L",129.6800334951,0.646025496500576,0.221008016229875,2.92  
308626411374,0.00346580482436453,0.0961200419507619  
"556","NT5DC1",68.0524509489007,-0.697835186788641,0.238740590279277,-  
2.92298509429133,0.00346693112712447,0.0961200419507619  
"557","DENND2A",176.16605543644,0.501735250963194,0.171692121481026,2.  
92229629778697,0.0034746082154846,0.0961599383154311  
"558","DZIP3",89.5401534602531,0.675946837744584,0.231392663134909,2.9  
2121119393697,0.00348673379847144,0.0963225833394932  
"559","LINC00517",5.12279868184645,-2.43008983127041,0.832637525383216  
,-2.91854469344506,0.0035166945873212,0.0969764705967018  
"560","FBLN5",2018.00294149311,0.650005745156791,0.222804669743822,2.9  
1737936150154,0.00352986165884146,0.0971657454840019  
"561","ADRA2B",8.45263891772444,1.99279251735484,0.684920534921582,2.9  
095236830401,0.00361979960412055,0.0986999469320067  
"562","UBE2E3",986.112977106993,-0.769040690318917,0.264218465714122,-  
2.91062431325674,0.00360707443432357,0.0986999469320067  
"563","SEMA3B",144.380502447423,1.09089956007292,0.374667680115762,2.9  
1164575427445,0.00359530124268673,0.0986999469320067  
"564","FABP5",130.801388580203,-1.37195382926259,0.471687413627655,-2.  
90860809431222,0.0036304164716476,0.0986999469320067  
"565","ENTPD1",66.6104471571353,2.38752123399745,0.820106011289086,2.9  
1123489052912,0.00360003267496614,0.0986999469320067  
"566","AC092069.1",4.52398787237473,-3.07806359788714,1.05824041382996  
,-2.90866192375615,0.00362979150035189,0.0986999469320067  
"567","MBNL3",88.1002309050186,0.851865357020222,0.292801739157168,2.9

0935893848282,0.00362170784234728,0.0986999469320067  
"568","ATP8B4",81.7215011412302,1.32202566306201,0.454845057833006,2.9  
0654067862244,0.00365449378917008,0.0991124067190055  
"569","SDF2L1",137.066772058699,-0.890471733183003,0.306403891857548,-  
2.90620242381581,0.00365844692981603,0.0991124067190055  
"570","PINK1",418.61160880336,-0.595852164132471,0.205153057198634,-2.  
90442741760144,0.00367925501106587,0.0993269982409462  
"571","FBXL7",161.780054161899,0.760884478179976,0.261952381167655,2.9  
0466715663483,0.00367643832183263,0.0993269982409462  
"572","TGFB2",1628.9472539152,0.524811935043013,0.180864621191056,2.9  
0168376538731,0.00371163013441778,0.099677314498345  
"573","POLR3G",40.015852905559,0.969297138905923,0.334015618144652,2.9  
0195154433213,0.00370845897386489,0.099677314498345  
"574","LGI1",15.8664379594146,1.56656800554839,0.539744104739997,2.902  
42726468134,0.00370283135043192,0.099677314498345  
"575","ALCAM",63.7176236823267,-0.930998652969432,0.32136427790806,-2.  
89701972798539,0.00376726064665716,0.100232468642916  
"576","SEPTIN11",756.660635430192,0.702189854386995,0.242290226901782,  
2.89813527918996,0.00375388634268701,0.100232468642916  
"577","LVRN",153.175940380323,1.00210162887698,0.345948073640314,2.896  
68220531522,0.00377131571929234,0.100232468642916  
"578","NOD1",38.2866219709605,0.858888806411979,0.296313254785419,2.89  
858382148298,0.00374852096032235,0.100232468642916  
"579","LRRC4C",33.3376784223357,-1.33460230810756,0.460565823283159,-2  
.89774499243952,0.0037585605608244,0.100232468642916  
"580","AC087645.2",16.1099243733995,-1.33625494958385,0.46123659843899  
2,-2.89711387627579,0.00376613023516512,0.100232468642916  
"581","IMPDH1",74.0230951273887,-0.734929057081442,0.253886221501683,-  
2.89471816443796,0.00379499094934068,0.100688098939908  
"582","SLC25A33",56.904042434547,-1.22846114402944,0.424825110776348,-  
2.89168675030647,0.00383179786450308,0.101142404248827  
"583","AC096642.1",14.0372659526569,1.63118855022036,0.564009318989157  
,2.89213049377242,0.00382638981990862,0.101142404248827  
"584","BMPR1B",2.71085511353797,-3.40547320638444,1.17728034596696,-2.  
89266122385433,0.00381993074952847,0.101142404248827  
"585","PRG4",944.315857717866,-2.27879482231284,0.79083069784674,-2.88  
152044238735,0.00395761561674108,0.103297777092221  
"586","SERTAD4-  
AS1",39.756323277645,-2.5988715715198,0.901454492993505,-2.88297589253  
74,0.00393937587991501,0.103297777092221  
"587","NCOA1",347.679471226642,0.498894022943185,0.173342080361375,2.8  
780895089243,0.00400091600169602,0.103297777092221  
"588","NR4A2",132.918996812299,-1.26506013131383,0.43930699921574,-2.8  
7967215084723,0.00398088897243197,0.103297777092221  
"589","SLC9A9",125.152841930963,0.650789491566936,0.225940199866608,2.  
8803616707038,0.00397219216858701,0.103297777092221  
"590","MGST2",107.48408170534,-0.820549616177801,0.28506546491732,-2.8  
7846027373324,0.00399621609132996,0.103297777092221  
"591","HLA-F-  
AS1",92.5801106433186,-1.01309449473393,0.351489851591732,-2.882286615



51991,0.00394800437895318,0.103297777092221  
"592","ENPP5",7.07601107364998,2.12965724556488,0.739785546965524,2.87  
87494623278,0.00399255374237971,0.103297777092221  
"593","VPS13B",136.549244918934,0.620013098352081,0.215398369452963,2.  
87844842988691,0.00399636614944228,0.103297777092221  
"594","AQP3",97.0189438779322,-1.34760017798521,0.467285280626873,-2.8  
8389177629857,0.00392793717214281,0.103297777092221  
"595","ZDHC12",82.2278696874255,-0.652382520622076,0.226567592607324,  
-2.87941674762266,0.00398411471803632,0.103297777092221  
"596","SLC38A7",52.2967996028737,0.783218772785289,0.272037241407066,2  
.87908658657992,0.00398828817267324,0.103297777092221  
"597","MTCL1",10.3330263822835,-1.57616924749169,0.547739555782988,-2.  
87758886655277,0.00400727023685686,0.103297777092221  
"598","SERTAD3",153.311344922754,-0.805574537465869,0.279489712622451,  
-2.88230479006603,0.00394777664644791,0.103297777092221  
"599","EFHD2",168.799481591419,-0.679730732805815,0.236314783541898,-2  
.87637837387055,0.00402267188378784,0.103521681283121  
"600","DMKN",4.03830625060674,-3.05043991282675,1.06363310202568,-2.86  
794375524532,0.00413148972757733,0.105968243179042  
"601","TOX2",8.93094200300538,-1.75481733160328,0.611811946737324,-2.8  
6822992091178,0.00412775446352392,0.105968243179042  
"602","H19",2092.56472627258,1.19158472865039,0.415749124614796,2.8661  
1482286205,0.00415543495089314,0.106405365063152  
"603","RERG",195.173792823805,-1.13146137620925,0.394955904072659,-2.8  
6477899062143,0.0041730037749975,0.106501412568852  
"604","SMARCE1",841.890758277207,0.486283375233102,0.169724558552996,2  
.86513265598661,0.00416834583206371,0.106501412568852  
"605","WNT5A",55.5728948825344,1.37380475760883,0.479898997395567,2.86  
269561942103,0.00420053874693803,0.106850337927475  
"606","PTPRG",352.20764191488,0.582940245780834,0.203600743706871,2.86  
31538135249,0.00419446890450682,0.106850337927475  
"607","CNTNAP2",2.98626447670536,4.52798943486319,1.58202495636391,2.8  
6214791786232,0.00420780477709469,0.106855778239251  
"608","MLH3",161.633106086954,0.630161564815409,0.220210303485496,2.86  
163524068216,0.00421461648845049,0.106855778239251  
"609","SLC25A3",2027.98886341398,-0.60827681747038,0.212739352833008,-  
2.85925856861966,0.00424632510900309,0.107482925378132  
"610","DHFR",49.7099312801716,0.828972142766525,0.29008942271947,2.857  
64346385073,0.00426799650916969,0.107854370801395  
"611","CIZ1",325.439346995963,-0.454648720366563,0.159267005978094,-2.  
85463217930458,0.00430866980479478,0.108704001703619  
"612","ELM01",62.4197813942126,0.757871570867205,0.265655388409303,2.8  
5283718657169,0.0043330815661396,0.1091412619968  
"613","SLC43A1",119.527848356933,0.557201328372167,0.195507649958721,2  
.85002314993716,0.00437160471208951,0.109931952099282  
"614","CD1C",7.27913920991632,-1.7960483122286,0.630691022663108,-2.84  
774675346534,0.0044029946196715,0.110540980557388  
"615","SENCR",5.26371079558499,-1.90012464770863,0.66755692943673,-2.8  
463859244363,0.00442185691926867,0.11083402343175  
"616","LGALS3",7782.48185391112,-0.726390135561783,0.255247480757972,-

2.8458268555863,0.00442962731100905,0.110848547076631  
"617","HS6ST1",104.109316227631,0.798564500603457,0.280683617291816,2.  
84506986303094,0.00444016832827267,0.110932244376537  
"618","ARVCF",19.6640031257663,1.05394399985228,0.370530468312237,2.84  
44192582947,0.0044492460682328,0.110979171750499  
"619","HEBP2",338.054132062984,-0.81554069281567,0.286970663636287,-2.  
84189569233915,0.00448461615846182,0.111500577552724  
"620","CRISPLD1",54.9627073837298,1.14594657905226,0.403176199128059,2.  
8422971929657,0.00447897177093068,0.111500577552724  
"621","PXDN",308.173417241265,0.762764011957266,0.268457925522586,2.84  
127954305112,0.00449329066073732,0.111536353518947  
"622","AC007262.2",10.8637000645702,2.32419214977354,0.818195928974317  
,2.8406303031685,0.00450244747748101,0.111583967629212  
"623","HIST1H2AC",78.5723618560453,1.06516407343968,0.375259927550034,  
2.83847007164828,0.00453303701586167,0.111811725400893  
"624","LM07",32.9536726253758,1.21505467958938,0.42796784326166,2.8391  
2611360964,0.00452372741497579,0.111811725400893  
"625","APP",2267.02757056124,0.505883630934799,0.178225644831862,2.838  
44466609757,0.00453339788359119,0.111811725400893  
"626","WFS1",64.2011068546723,0.794183611190873,0.279947826362832,2.83  
689865182791,0.004555406952396,0.112042277026496  
"627","LINC01554",6.32547190734172,2.7684352841885,0.9759120372809,2.8  
36767227405,0.00455728236753897,0.112042277026496  
"628","CPZ",4.98582668268528,2.75116201660889,0.971299974832912,2.8324  
5350344229,0.00461922836386708,0.113271660615952  
"629","LM02",35.1591082834395,-1.20783268100847,0.426455006795825,-2.8  
3226286890975,0.00462198342701483,0.113271660615952  
"630","AL161772.1",77.5032739807855,-0.719950888068569,0.2542640897829  
93,-2.83150832932415,0.0046329026906293,0.113359039644525  
"631","XG",579.706057134889,-0.726911279636726,0.256820755750003,-2.83  
042263275762,0.00464865525660698,0.113564216767982  
"632","SLC43A2",31.9921029103899,1.07475852360321,0.379992095848064,2.  
82837073546114,0.00467855910655408,0.11411390605622  
"633","PKM",836.555953995923,-0.670075374257703,0.236972448892292,-2.8  
2765096697913,0.00468909002683721,0.114190083354969  
"634","RARG",304.642527646215,-0.628499363454524,0.222392294776738,-2.  
8260842583844,0.00471208674170333,0.114388688383239  
"635","ZNF667",41.2979355915891,0.9061425746427,0.320629319887624,2.82  
613759390529,0.00471130218803079,0.114388688383239  
"636","ATP1B3",354.306980999414,-0.57750794033456,0.204655286671339,-2.  
82185693674258,0.00477464715875778,0.11518182465141  
"637","FAXDC2",268.391958135602,0.629438366079061,0.223025497976194,2.  
82227086943326,0.00476848831081223,0.11518182465141  
"638","GSN",60206.8620933367,-0.784188618674472,0.277805700856848,-2.8  
227952711401,0.00476069613392308,0.11518182465141  
"639","ENOSF1",129.09449923431,0.513348813279342,0.181913083300065,2.8  
2194553556423,0.00477332830378657,0.11518182465141  
"640","NEK6",111.243738260976,0.953324560479733,0.338644708058561,2.81  
511725355199,0.00487594400067346,0.117258466100439  
"641","CEP131",83.0601480087203,1.11829580873112,0.397218262627251,2.8

1531821154085,0.00487289571580647,0.117258466100439  
"642","RXYLT1",127.118573540376,-0.549519732435565,0.195409416570046,-  
2.81214560731563,0.00492122201798579,0.118162986615656  
"643","ZNF43",109.557346247071,0.598721936862704,0.213068625132472,2.8  
0999577713734,0.00495421500055163,0.118585751915378  
"644","DMD",88.0556825686693,0.856400011016943,0.304742440788176,2.810  
24201552622,0.00495042591509289,0.118585751915378  
"645","SYBU",8.11869221615075,-1.71762420166324,0.611944586975035,-2.8  
0682963494097,0.00500316942310669,0.119571870786341  
"646","SOX13",60.409203935067,0.740706922870435,0.264156282453153,2.80  
40481036138,0.00504653752232235,0.120421634530339  
"647","ARHGEF26",57.4765862539517,-1.0407795963182,0.371344158314368,-  
2.80273587995186,0.00506711473409169,0.120725770673916  
"648","ENC1",10.468322193464,-1.73842743800418,0.620583834563064,-2.80  
127734752897,0.00509007522017881,0.120957666953715  
"649","BZW2",202.520495528365,-0.584932374918781,0.208820813717566,-2.  
80112104011774,0.00509254141115544,0.120957666953715  
"650","DKK3",97.0392156241448,-2.86493300428994,1.0231097388217,-2.800  
22063673192,0.00510676886084446,0.121108987676796  
"651","TLR5",88.7563085109533,0.86814605830288,0.310089338384883,2.799  
66432520597,0.00511557719400084,0.121131524493891  
"652","LM03",405.283617486568,0.564644983706188,0.201764678062355,2.79  
853237508543,0.00513354228381648,0.121370482062931  
"653","IL1RN",7.97323900596385,-2.27492455375474,0.813632388492609,-2.  
79601031857818,0.00517377485452577,0.122134363526056  
"654","MLF1",202.135589100454,-0.626649111401163,0.224250217484541,-2.  
79441919134086,0.005199303332216,0.122549328541452  
"655","SPRED2",133.419102455682,0.640325802187342,0.229300054782944,2.  
79252354646612,0.00522986611086374,0.122893881248422  
"656","VSIG10L",6.34601402123513,-1.66469397243195,0.596123643703488,-  
2.79253136495282,0.0052297397236714,0.122893881248422  
"657","AL158151.1",18.1603427555147,1.64585803855243,0.589636126739551  
,2.79131139344083,0.0052494941851117,0.123167355956616  
"658","GPR34",4.80501239419214,-2.75510906406499,0.987231354956287,-2.  
79074307175645,0.00525871976304288,0.123196299615967  
"659","SLC12A6",95.1548146241992,0.71842347417019,0.257621229528215,2.  
78868117928732,0.0052923135954756,0.123715110025042  
"660","ZNF486",27.3953069011765,0.870377526688462,0.312142325805505,2.  
78839956882615,0.00529691680937578,0.123715110025042  
"661","TMEM140",222.182984623067,0.726663470355131,0.260832913697766,2.  
.78593471986873,0.00533736192256943,0.12428313298551  
"662","ABTB2",5.85049323637606,-2.33197237803008,0.836935136438186,-2.  
78632390552325,0.00533095738389281,0.12428313298551  
"663","RGS17",10.5265633774994,-1.68732829702927,0.605985686892254,-2.  
78443589267362,0.00536209196744287,0.124670660148012  
"664","DPYD",232.521019268707,0.486889301438277,0.175139922590792,2.78  
000180790234,0.00543585958231736,0.126195444972021  
"665","ZMAT3",176.125724121813,0.762081206154997,0.274329843827736,2.7  
7797411875298,0.00546989748955986,0.126713512111915  
"666","FBX010",17.0533136970158,1.10293886587403,0.397246059371021,2.7

7646269825902,0.00549539404734215,0.126713512111915  
"667","PDS5B",264.042073516649,0.52576758170037,0.189336814957066,2.77  
689038880048,0.00548816836056672,0.126713512111915  
"668","AL161421.1",17.6670354349048,-1.01217438681008,0.36458551500784  
7,-2.77623313364025,0.00549927600407858,0.126713512111915  
"669","TYROBP",55.2483518165754,-1.2098469462844,0.435652673505958,-2.  
77709060419172,0.00548478873713345,0.126713512111915  
"670","BOLA3-  
AS1",31.8813090581946,-0.784191838786336,0.282616230412991,-2.77475868  
119954,0.00552426817122742,0.127086646829362  
"671","ACADVL",618.38556824671,-0.553134134358822,0.199377464645421,-2  
.77430619023334,0.00553195848345778,0.127086646829362  
"672","PPP1R16A",28.3056518764715,-0.950317877169693,0.342669025196299  
, -2.77328210982974,0.00554939893428182,0.127297596089218  
"673","FBLN2",5625.82890597678,0.472434742775824,0.170497692791054,2.7  
7091575282954,0.00558988876645968,0.128035862310514  
"674","SHISA6",19.1553128380235,1.45771189175444,0.526707006637762,2.7  
6759540576412,0.00564715138751357,0.128964205390402  
"675","TUG1",299.61840706009,0.690553035082892,0.24949042708732,2.7678  
5383369119,0.00564267562951065,0.128964205390402  
"676","SORT1",52.7484518695797,-0.934694573741555,0.337916010343392,-2  
.76605589889545,0.00567388080235282,0.129191835403647  
"677","EDNRA",4.72328365196211,2.61965729738413,0.947025575275537,2.76  
619487981825,0.00567146309311589,0.129191835403647  
"678","PDZRN3",104.836956612717,1.08362966035037,0.391942480365012,2.7  
6476706311906,0.00569634568612408,0.129213022729324  
"679","AC005162.3",7.14976592735717,1.76210170445196,0.637493184949119  
, 2.76411065412818,0.00570781794353107,0.129213022729324  
"680","CCDC85B",565.455293158551,-0.81445283900233,0.294568984364786,-  
2.76489678897672,0.00569408089100672,0.129213022729324  
"681","GPR183",57.2973962848935,-1.59773303997244,0.578034133050446,-2  
.76408078453908,0.00570834047866816,0.129213022729324  
"682","IGF2R",275.543542751908,0.634314675461587,0.229746693862809,2.7  
6093059184722,0.00576369240452387,0.129228193958728  
"683","C8orf88",25.7247741590283,-1.01812265423554,0.368746105695823,-  
2.76103974661465,0.00576176638421452,0.129228193958728  
"684","IL17D",172.849978097502,-0.808558553969342,0.292940338518759,-2  
.76014753740569,0.00577752631800132,0.129228193958728  
"685","TSHR",4.14435260139691,4.21938487074971,1.52781317114506,2.7617  
1520866479,0.00574986085464717,0.129228193958728  
"686","PIF1",4.97415547213068,2.27985979255088,0.825599351999392,2.761  
46024948983,0.00575435209408075,0.129228193958728  
"687","GJC1",3.23056926351951,-3.03497124194744,1.09972460770047,-2.75  
975568855697,0.00578446019017334,0.129228193958728  
"688","KCNK15-  
AS1",44.0878618974577,-1.05245800220887,0.38083886397372,-2.7635257369  
1505,0.00571805827054685,0.129228193958728  
"689","SDC4",112.672211375458,-0.791575807287574,0.286523132735335,-2.  
76269423599651,0.00573264413458571,0.129228193958728  
"690","LINC01426",26.6119664190907,1.21760486570752,0.441100948249143,

2.76037689454204,0.00577347125896048,0.129228193958728  
"691","MAP4K3",97.613338934618,0.602099700267915,0.218499398768805,2.7  
5561261797795,0.0058582333445981,0.130498073709508  
"692","AL356218.2",4.09102189347664,-2.37412613855406,0.86147849745189  
5,-2.75587393716304,0.005853552506463,0.130498073709508  
"693","AL162231.1",27.90097789335,-0.999798818001064,0.362898489493645  
, -2.75503714384728,0.00586854727466024,0.130539186491901  
"694","HELLS",19.5625700737689,-1.17112762507324,0.425662696889265,-2.  
75130433940259,0.00593584678717904,0.131656227660957  
"695","ZNF528-  
AS1",40.9459407962382,0.968933387917014,0.352113061743504,2.7517678075  
3118,0.00592745317514388,0.131656227660957  
"696","RALGPS2",193.746497681659,0.843084534724144,0.306651837074629,2  
.7493216501389,0.0059718752173612,0.132265023671872  
"697","AC021016.2",3.82333792575696,2.75245172844109,1.00194200459479,  
2.74711681496402,0.00601217167373914,0.132775968983795  
"698","HYAL3",6.57786731728598,-1.76465173793393,0.642362265023445,-2.  
74712858151704,0.00601195597485423,0.132775968983795  
"699","FHDC1",47.5870120931308,0.760623472805098,0.277031532598993,2.7  
4562056408976,0.00603965711922258,0.13310950570907  
"700","GAL",167.486844279643,2.27656373353254,0.829241978741585,2.7453  
5514589763,0.00604454453430742,0.13310950570907  
"701","C1orf162",21.6734431685694,-1.30505825319905,0.475831780627421,  
-2.74268829097172,0.0060938501564247,0.133622617583623  
"702","GPR146",32.0885721681777,1.13696484805506,0.414502694443901,2.7  
4296129625989,0.00608878616035382,0.133622617583623  
"703","NET1",91.9010309226597,0.822675777744102,0.299890055724831,2.74  
325794416792,0.00608328791278442,0.133622617583623  
"704","SESN1",188.453949411078,0.638746823054537,0.232940878981651,2.7  
4209844938745,0.00610480412747027,0.133672664239992  
"705","OGA",372.983707058251,0.640170605102407,0.233854211787551,2.737  
47733773546,0.00619123856321123,0.135372968016881  
"706","WARS2-  
AS1",31.5719503074929,0.879194737893501,0.321329506618648,2.7361157932  
4063,0.00621691455594742,0.13553100720342  
"707","AL512308.1",23.3521654905283,1.28581749713108,0.470174265705525  
, 2.73476791674601,0.00624242718874009,0.13553100720342  
"708","AIG1",215.771511286691,-0.543096943302716,0.198529285436693,-2.  
73560115883204,0.00622664446628199,0.13553100720342  
"709","NR1H3",116.842476131775,0.839454105364143,0.306936673701798,2.7  
3494234247064,0.00623912035429829,0.13553100720342  
"710","PRRG1",93.9046070540113,0.608282573114265,0.222400222871667,2.7  
3508077132308,0.00623649708585639,0.13553100720342  
"711","LRR4B",4.95953526515164,2.64061250952741,0.965887390154649,2.7  
3387201908145,0.00625943686226801,0.135709169102477  
"712","SPAG17",56.6439014260524,-2.20069557454624,0.806130652063572,-2  
.72994900877767,0.00633441224553994,0.136517107119473  
"713","SWT1",38.8892434219914,0.752075647905428,0.27556333038623,2.729  
22978123148,0.00634824525100972,0.136517107119473  
"714","RASA4",10.6936149960464,-1.45326130727545,0.532117722477226,-2.

7310898432586,0.00631252604985762,0.136517107119473  
"715","FRMD4A",85.5162390169945,0.834362412923788,0.305699762130799,2.72935250949522,0.00634588287889674,0.136517107119473  
"716","OXT",28.9670858125593,-1.23882673966653,0.453924516629163,-2.72914701516024,0.00634983884558301,0.136517107119473  
"717","ATP7A",71.7557480231732,0.598103181877258,0.219021572922061,2.73079575631618,0.0063181614030785,0.136517107119473  
"718","CADM1",4.71403932447874,-1.95416936022106,0.716338872124029,-2.72799569626414,0.00637204393714218,0.136711797752165  
"719","AL354822.1",14.6258910015348,1.91991475615012,0.703843440268606,2.7277582574577,0.00637663201970851,0.136711797752165  
"720","VWCE",23.3446490346383,1.27798534736443,0.468860231845061,2.72572775544494,0.00641598943413385,0.137364551565518  
"721","ANXA1",7171.27324157658,-0.536375649107594,0.196974662567557,-2.7230692623912,0.00646784963436074,0.138091277165749  
"722","OLFM4",34.2170307238794,1.20383989812117,0.44208890656761,2.72307194375859,0.00646779713851403,0.138091277165749  
"723","TBCK",69.8537662986173,0.633609812405935,0.232876847408155,2.72079349861444,0.00651254303309457,0.138853182372272  
"724","PRSS12",26.0072473577377,1.47025872383177,0.541173019207527,2.71679975100155,0.00659164760499937,0.139959019051054  
"725","EMX2",428.445355833151,-0.826415820064956,0.304165782070054,-2.71699141974694,0.00658783155275724,0.139959019051054  
"726","RBM3",1516.22954422443,-0.717929472821633,0.264180913986443,-2.71756752593594,0.00657637345315827,0.139959019051054  
"727","FOS",34957.5406591853,-0.299618522759451,0.110335639377974,-2.71551897871416,0.00661719835729065,0.140308270533199  
"728","C3orf14",116.728700114941,-0.668259598215587,0.246219201839639,-2.71408400816285,0.00664593103944064,0.140586892085573  
"729","LAIR1",5.72278662767291,-1.98148089102854,0.730109027875881,-2.71395204739941,0.00664857893807221,0.140586892085573  
"730","CAMK2N1",740.704370821476,-0.714262139401261,0.263338499252556,-2.71233466214997,0.00668111021487163,0.140695784101429  
"731","SPRY2",571.581319886938,0.71487174072454,0.263550409257598,2.71246682081914,0.00667844668303389,0.140695784101429  
"732","HS3ST3A1",3.77971769034246,-2.35552631587394,0.868284173476774,-2.71285183794376,0.00667069247102452,0.140695784101429  
"733","AFAP1",171.08676649197,0.61926411525026,0.228367136636789,2.71170416361257,0.00669383046141877,0.140769177336118  
"734","FGFBP2",173.866667984075,-2.55545815881982,0.943330224729307,-2.70897517309288,0.00674913898910867,0.140769177336118  
"735","MSRA",49.2844863335931,-0.699378157255808,0.258049826961939,-2.71024462790654,0.00672336002090806,0.140769177336118  
"736","MEGF9",114.876528165233,0.668348839150329,0.246648152139646,2.70972570989272,0.00673388703592605,0.140769177336118  
"737","LRRC32",252.480879641342,-0.581610951255771,0.214639637587446,-2.70970896984868,0.00673422687887332,0.140769177336118  
"738","SUPT20H",129.610092980058,0.484614335267833,0.178949358001243,2.70810882296916,0.00676678302991007,0.140769177336118  
"739","NPAS3",15.2420830481159,1.26288998720885,0.465845194282295,2.71

096493579702,0.00670877203380105,0.140769177336118  
"740","STX16",285.692269359219,0.571579239336822,0.211055461293624,2.7  
0819449936731,0.0067650363036522,0.140769177336118  
"741","RAI2",143.919300824733,-0.816507068861043,0.301497423378387,-2.  
70817262619292,0.00676548220413486,0.140769177336118  
"742","AC108734.4",67.9777156079756,0.880387113258439,0.32524482013541  
2,2.70684437923377,0.00679260903325382,0.141115994942868  
"743","ACTR3",519.332888122174,-0.427351599966336,0.15802151375678,-2.  
70438872408282,0.00684301848245535,0.14167362018881  
"744","RECK",569.824697614441,0.656186415876074,0.24260287584698,2.704  
7759165475,0.00683504797774331,0.14167362018881  
"745","NHLRC3",216.598317184059,0.510112083123054,0.188637357614335,2.  
70419438426383,0.0068470221888202,0.14167362018881  
"746","GSTM2",59.0674031303003,0.802469857345268,0.29680295619919,2.70  
371248191584,0.00685695921819427,0.141689043362553  
"747","ZNF674-  
AS1",11.2754554147533,-1.32216589351159,0.489491527301332,-2.701100672  
36703,0.00691104159381017,0.142615403170795  
"748","CARD19",140.988481777857,-0.553605868618804,0.205045747566546,-  
2.69991392257055,0.00693574182913053,0.142914209158121  
"749","AL161431.1",53.5405433248616,-1.1642042228628,0.431264226327257  
, -2.69951494186621,0.00694406374696285,0.142914209158121  
"750","RNASEL",77.2573899377981,0.631751607656517,0.234087880161518,2.  
69877965155913,0.00695942389124627,0.143039359044748  
"751","SSBP4",443.668179140171,-0.568719764662553,0.21082783291472,-2.  
69755542615002,0.00698506555732337,0.143375213803115  
"752","MTMR11",61.1932163821938,-0.795994443488094,0.295229480037004,-  
2.69618888800781,0.00701378818798868,0.143732525065379  
"753","RNF112",16.5232055530353,-1.0704001089222,0.397121258412366,-2.  
69539866287064,0.00703044592275677,0.143732525065379  
"754","ZNF880",38.3977516685338,0.9933582890057,0.368537405039882,2.69  
540696662311,0.0070302706973338,0.143732525065379  
"755","EPHB3",19.6298052297268,1.27870690251339,0.474523409957807,2.69  
471827033168,0.00704481686968007,0.143835565623998  
"756","KRT222",570.123235916539,0.922574935395655,0.34243883753105,2.6  
9413055495495,0.00705725155856021,0.143898852877256  
"757","FAM107B",249.299715982696,0.639778947336365,0.237601985381708,2.  
.69264983753633,0.00708866751201594,0.144348493656177  
"758","MAP1A",694.673604976857,-0.57394743524969,0.21319426194729,-2.6  
9213359687697,0.00709964992515897,0.144381403161379  
"759","MINDY4",63.0293332215698,-0.774725660491893,0.287972696823178,-  
2.69027469978375,0.00713932242674218,0.144806125273988  
"760","THOC6",64.8745668822199,-0.7371690271962,0.274000879154071,-2.6  
9038927711501,0.0071368713791447,0.144806125273988  
"761","OSMR",184.065661416225,0.505854528724426,0.18822373637345,2.687  
5171987914,0.00719853950706143,0.145592475197747  
"762","DAB2",1504.58327846878,0.542756301740424,0.201982025944906,2.68  
715148885807,0.00720642611585343,0.145592475197747  
"763","BAALC",2.83773834465656,-3.52102444276889,1.31005303820985,-2.6  
8769610090005,0.00719468426930191,0.145592475197747

"764", "KPNA5", 99.2805676512476, 0.625201534822068, 0.232712949697759, 2.68657818842511, 0.00721880506396744, 0.145651675472589  
"765", "ITGB1BP1", 1068.26606143568, -0.683571291086883, 0.254654401923033, -2.6843097387081, 0.00726797376541247, 0.146452046527887  
"766", "AC008280.3", 10.6428797900154, 1.3920048318766, 0.518719392865271, 2.68354114194097, 0.00728470115360114, 0.146597478175929  
"767", "KL", 13.045442474373, 1.20367760803515, 0.44902628250076, 2.68063954147965, 0.00734816207253072, 0.147681770988345  
"768", "AC003681.1", 60.8815573538508, 1.22417407215523, 0.456927108272629, 2.67914520717124, 0.00738103777182407, 0.148149345381078  
"769", "ARHGAP29", 613.194684814537, 0.646417721456579, 0.241338453113564, 2.67846964757166, 0.00739594349928057, 0.148255486399753  
"770", "AC068491.3", 26.8645289930684, 1.32015147577814, 0.493447376417125, 2.67536426146113, 0.00746480947756018, 0.148547630309788  
"771", "ACSL3", 304.54208667174, 0.661161702508061, 0.247144230931263, 2.67520589097605, 0.00746833691145547, 0.148547630309788  
"772", "TPBG", 295.105851211368, -0.555873355353632, 0.207620213982769, -2.67735662482153, 0.00742056042822734, 0.148547630309788  
"773", "ZDHC7", 235.525731462178, 0.591641178996605, 0.221027866977874, 2.6767718798817, 0.00743352276500354, 0.148547630309788  
"774", "SEC11C", 36.3059734769784, -1.0073061176605, 0.376512054244067, -2.67536219971203, 0.00746485538992277, 0.148547630309788  
"775", "REM1", 30.3504781500043, -1.39853592096802, 0.522558196947953, -2.67632567843408, 0.00744342759524373, 0.148547630309788  
"776", "SLC38A4", 2.57139203969041, 3.53922166592206, 1.32325914840542, 2.67462474768224, 0.00748129370321271, 0.148613585612144  
"777", "TP53INP1", 93.7651793900849, 0.744828997897433, 0.278682945835766, 2.67267519963844, 0.00752490692613891, 0.149287567910465  
"778", "FAM107A", 23.7958985732304, -0.868239243119007, 0.324976894310729, -2.67169530609408, 0.0075469140413063, 0.149339768866157  
"779", "AC129507.1", 3.91304819040655, 4.16966657139289, 1.5606236840446, 2.67179500991972, 0.00754467219089126, 0.149339768866157  
"780", "CXCL12", 4760.5458046451, 0.583293325091668, 0.218397970127341, 2.6707818060377, 0.00756748200256751, 0.149554788550741  
"781", "LAMB1", 380.639209444372, 1.23691722964974, 0.463350480375357, 2.6695067385011, 0.00759627488651048, 0.149931597151804  
"782", "SNCG", 103.254447271621, -1.41257875232822, 0.529310959754957, -2.66871245776239, 0.00761426051027212, 0.150094406350185  
"783", "ARFGAP3", 263.609637332013, -0.461700429587828, 0.173061411221214, -2.6678415848445, 0.00763402434565997, 0.150291807520241  
"784", "ART3", 5.41807927691338, 2.19368051785668, 0.823040984211198, 2.66533570009165, 0.00769115037670733, 0.151223320225693  
"785", "LINC01220", 22.6624515060336, -3.04705315394654, 1.14366134391397, -2.66429670825331, 0.00771494815807632, 0.15149799472197  
"786", "POMT1", 62.8240179473627, 0.580562519251292, 0.217945237642702, 2.66379997806175, 0.00772634890562001, 0.151528840178286  
"787", "TBC1D16", 204.810029772827, 0.452656910819218, 0.170099497242085, 2.66113021001466, 0.00778788335318468, 0.152452638955605  
"788", "MAP7D3", 554.280942945417, 0.53666185162622, 0.201684410913215, 2.66089902137824, 0.00779323253305332, 0.152452638955605



"789", "C6orf47", 93.0963590816757, -0.502350605856432, 0.188970932884926, -2.65834855227359, 0.00785246344303165, 0.15341663368103  
"790", "NECAB2", 6.55600302852102, 3.02580510325968, 1.14063875377139, 2.65272865160437, 0.00798440291166491, 0.155796925168753  
"791", "A4GALT", 364.581605836441, -0.681797135131973, 0.257295990210712, -2.64985526814319, 0.00805262590911439, 0.156929492274334  
"792", "NRK", 16.973872082622, 2.1988178859715, 0.829986931945809, 2.64921988689222, 0.00806778210284081, 0.157026339792034  
"793", "FHAD1", 4.99234459171204, -2.15952633182665, 0.815461840476318, -2.64822487655002, 0.00809156809634188, 0.157190216034899  
"794", "SUCLG2-AS1", 56.0381575464772, 0.790568424233837, 0.298551353276228, 2.64801487435356, 0.00809659627192407, 0.157190216034899  
"795", "PBX1", 621.319366242286, 0.57056998499209, 0.215587696833954, 2.64657952829072, 0.00813103835579249, 0.157640424468339  
"796", "SYNP0", 8.47655076254635, -1.42914008455124, 0.540073193550545, -2.64619703702715, 0.0081402385907751, 0.157640424468339  
"797", "SLC39A8", 69.5562216861725, 1.04053855917591, 0.393508039526007, 2.64426251730276, 0.00818691335629437, 0.158345381916283  
"798", "FKBP1B", 33.6907685600728, -1.05611658268121, 0.399495487293325, -2.64362581373983, 0.00820232760860702, 0.158444711888067  
"799", "RINL", 41.6813806338768, -0.733031789624919, 0.277496686964293, -2.64158753621171, 0.0082518480254009, 0.159201798888054  
"800", "VAMP8", 31.4685195657971, -0.893079065106742, 0.338300292029711, -2.63990036706296, 0.00829304036843193, 0.159796521599223  
"801", "LRRC61", 7.12940509604442, -1.58617672151267, 0.601375763232414, -2.63758005973988, 0.00834999129449929, 0.160693028470295  
"802", "AC007920.2", 29.6473178417458, -1.03074495017117, 0.390999704403869, -2.63617833610049, 0.00838456526536528, 0.16079887140986  
"803", "AC025171.2", 44.1718770986732, 0.762709194397311, 0.289306927730471, 2.63633228689179, 0.00838076176940286, 0.16079887140986  
"804", "PDE1C", 27.7038248607254, 1.51211054878089, 0.573710833964802, 2.63566671441603, 0.00839721644404392, 0.16079887140986  
"805", "PKN1", 304.213359344779, -0.582785404704144, 0.22109183623399, -2.63594266812891, 0.0083903906503557, 0.16079887140986  
"806", "DNASE1L3", 162.768781782382, 2.08701519155872, 0.792630508598924, 2.63302404956351, 0.00846283546980884, 0.161293140703632  
"807", "SYNJ2", 80.0803070888938, -1.38315982906681, 0.525138717715337, -2.63389421196055, 0.00844117832974007, 0.161293140703632  
"808", "WDR86-AS1", 105.465342103896, 1.21326773762682, 0.46071614199319, 2.63343874251481, 0.0084525081450954, 0.161293140703632  
"809", "FOLH1", 21.6624632650989, 1.43163670194569, 0.543740323695113, 2.63294193856485, 0.00846488166261681, 0.161293140703632  
"810", "C17orf49", 421.53538386259, -0.712885043408536, 0.271002277146881, -2.63055001202871, 0.00852468258127993, 0.162232076531395  
"811", "SLC35E4", 24.6057618475208, -1.04817479825344, 0.398939450414534, -2.62740322413411, 0.0086039311658878, 0.16353834638984  
"812", "ZNF561", 58.5665342920323, 0.625637611213358, 0.238253817717053, 2.62592900801429, 0.00864128379955316, 0.163866057467987

"813", "NCF4", 8.72544505582426, -1.46924904408957, 0.559525549612382, -2.6  
258837422302, 0.00864243300171737, 0.163866057467987  
"814", "OSBPL6", 8.65118877630939, -1.38100748704437, 0.526249716579785, -2  
.62424366899397, 0.00868416322955518, 0.164455007596552  
"815", "SDS", 4.11767452684701, -2.58723520164325, 0.986282377392717, -2.62  
321953727159, 0.00871031261199891, 0.16474781461836  
"816", "INKA1", 17.3605547107441, -1.2726882535086, 0.485330385946695, -2.6  
2231315071293, 0.0087335142546768, 0.164782279358437  
"817", "FAM182A", 33.0102931709863, -0.759384330774458, 0.289583666054043,  
-2.62233136668951, 0.00873304741963971, 0.164782279358437  
"818", "CNTNAP4", 5.74271708544531, -1.80480188793614, 0.688376917184839, -  
2.62182220652748, 0.00874610446680435, 0.164818093344485  
"819", "ZNR3", 51.3054552684866, 0.730880860185349, 0.278891200764292, 2.6  
2066661903422, 0.00877580342548869, 0.165175836146408  
"820", "NCOA2", 202.951595019679, 0.491349654799825, 0.187608768980565, 2.6  
1901220006793, 0.00881847936135613, 0.165776657750372  
"821", "TUBB3", 93.115507072679, -1.41211547231342, 0.539294929106193, -2.6  
1844752490776, 0.0088330876094463, 0.165849020096973  
"822", "TPCN1", 196.717967627739, 0.630748482862381, 0.240953825817313, 2.6  
1771516066569, 0.00885206620526191, 0.166003163691134  
"823", "FZD10", 3.59256493579905, -3.69109991032388, 1.41032526372035, -2.6  
1719761056183, 0.00886550003438285, 0.166053077800743  
"824", "LINC01121", 11.4726928695594, 1.42430380878069, 0.544384784919529,  
2.6163549170303, 0.00888741244475222, 0.166059954952552  
"825", "DANCR", 156.713872179247, -0.766938253459994, 0.293115775064166, -2  
.61650282483808, 0.00888356292733747, 0.166059954952552  
"826", "CLIP4", 123.863305740643, 0.610871432029221, 0.233522920132266, 2.6  
1589496946693, 0.00889939277704797, 0.166082493532923  
"827", "CCDC47", 336.225979132274, -0.34923678569131, 0.133527267331474, -2  
.61547167609106, 0.00891043111594234, 0.166087419168381  
"828", "CHSY3", 14.9913134392721, 1.22169829428615, 0.467257427117738, 2.61  
461503527543, 0.00893280740026194, 0.166102805880625  
"829", "PDPR", 106.369454568629, 0.665757464468299, 0.254613525514486, 2.61  
477650538412, 0.00892858581079532, 0.166102805880625  
"830", "MXRA7", 1139.8847814384, -0.564501809173154, 0.215986099000536, -2.  
61360250398222, 0.00895932040274, 0.166395089166551  
"831", "NDFIP1", 1420.55336219335, -0.517874793233695, 0.198201285758028, -  
2.61287302578823, 0.00897846522774704, 0.166549989754176  
"832", "LRBA", 60.4497538801829, 0.808097629859277, 0.309392240191325, 2.61  
188719329081, 0.0090043960011094, 0.166629969216208  
"833", "ITPR3", 102.138985983944, 0.691473645288565, 0.264730251772175, 2.6  
1199330510833, 0.00900160168850773, 0.166629969216208  
"834", "CDS1", 49.8901061836094, 1.12977512425673, 0.43296210021459, 2.6094  
0882284334, 0.00906988126707544, 0.167439784110141  
"835", "LINC00294", 48.101381142329, 0.862363962090775, 0.330449946030136,  
2.60966591900163, 0.00906306837854792, 0.167439784110141  
"836", "APPBP2", 214.894368634297, 0.430415840156651, 0.165017401408232, 2.  
60830576947372, 0.00909916341808429, 0.167779430729389  
"837", "RBM24", 2.52010214823248, -2.57998708196597, 0.989907364610642, -2.  
60629143109846, 0.00915285481073224, 0.168567809925254

"838", "TMC3-  
AS1", 11.2866844364957, 1.364286650462, 0.524708516502404, 2.6000848233911  
9, 0.00932007199449286, 0.171238271507875  
"839", "MAPK11", 5.54345657208615, -1.98172984927084, 0.762114581778996, -2  
.60030433303731, 0.00931411182502977, 0.171238271507875  
"840", "CCDC110", 9.34991125704734, -1.76897131849532, 0.680673577170984, -  
2.5988541025017, 0.00935355184002944, 0.171448098523557  
"841", "ZNF790-  
AS1", 18.410199714705, 0.996247094152017, 0.383341909672301, 2.59884731884  
301, 0.00935373667585545, 0.171448098523557  
"842", "CCNB1IP1", 158.713375279626, -0.708830019473618, 0.273056193438364  
, -2.59591262350774, 0.00943400525692358, 0.17271400360508  
"843", "SNX7", 383.029798737728, -0.611457576551594, 0.235628415540802, -2.  
59500780136474, 0.00945887719997723, 0.172856957980849  
"844", "VIT", 994.246425995854, 0.492114522194613, 0.18965317763753, 2.5948  
1295449294, 0.00946424083917201, 0.172856957980849  
"845", "GLI1", 25.7567348312954, -0.911630452436827, 0.351529654559735, -2.  
59332446242289, 0.00950530483801673, 0.173401507784648  
"846", "LINC00963", 217.267245462097, -0.560048522932783, 0.21599608785814  
3, -2.59286419715434, 0.0095180345984116, 0.173428490939143  
"847", "PILRA", 12.971250559986, 1.49872472831864, 0.578324810320443, 2.591  
4930529925, 0.00955604709290501, 0.173505849160342  
"848", "FOXP2", 83.2713690206398, 0.74557940019819, 0.287618734001516, 2.59  
224908553509, 0.00953507074768613, 0.173505849160342  
"849", "NR1H2", 285.415418007659, -0.392146536049141, 0.151312656612117, -2  
.59163076525971, 0.0095522231633404, 0.173505849160342  
"850", "LINC01894", 35.3562202718702, 0.998397446857364, 0.385555189588627  
, 2.58950592241442, 0.00961137695395553, 0.174305147935558  
"851", "AC093599.2", 5.76791684904622, 2.02416986666337, 0.781816313925806  
, 2.5890606663082, 0.00962381381019442, 0.17432560503425  
"852", "LAYN", 16.6079172919123, -1.45081644765295, 0.5605347358211, -2.588  
27215324617, 0.00964587369686394, 0.174520120935631  
"853", "SLC38A5", 6.32354507498291, -1.53699432200429, 0.594471021111862, -  
2.58548233205647, 0.00972428564708254, 0.175732547772306  
"854", "AC097534.2", 32.8984408225684, -0.932221549374191, 0.3608587615122  
44, -2.58334187444292, 0.00978483093799273, 0.176013480894771  
"855", "HLA-  
DMB", 17.7077631873114, -1.24815983970568, 0.483154878475503, -2.583353486  
2444, 0.00978450158066701, 0.176013480894771  
"856", "KCNS2", 5.41309874805671, 3.3660983065806, 1.303013466766, 2.583318  
12558702, 0.00978550458169439, 0.176013480894771  
"857", "AKT1", 234.231598738935, -0.4273772396934, 0.165415557796235, -2.58  
365806328724, 0.00977586607996964, 0.176013480894771  
"858", "KIRREL1", 244.218851586224, 0.63961013967344, 0.247773377973644, 2.  
58143205256489, 0.00983913578863289, 0.176771885992746  
"859", "NIPAL2", 156.668705987208, 0.69412949749517, 0.268940888776745, 2.5  
80974208319, 0.00985219420617624, 0.176800435027016  
"860", "NMNAT3", 48.5576195059705, 0.684112238144231, 0.265312241146836, 2.  
57851742982945, 0.00992252938176382, 0.176850160886058  
"861", "CDH18", 2.38640641060489, 3.40345498221984, 1.32035838226505, 2.577

67514330563,0.00994674599339686,0.176850160886058  
"862","FGF1",5.48167903767628,-2.2080756559425,0.856314500476707,-2.57  
858024675896,0.00992072543626866,0.176850160886058  
"863","MSC",38.2164026972048,-0.697165930941856,0.270332310353415,-2.5  
7892195731404,0.00991091747823617,0.176850160886058  
"864","IKBIP",338.93183910382,-0.434388953024467,0.1684837167368,-2.57  
822513319228,0.00993092725596168,0.176850160886058  
"865","AC018926.2",53.9288806860977,-1.03577574898579,0.40169114313774  
,-2.57853768169996,0.00992194776665218,0.176850160886058  
"866","PAQR4",7.7863296393998,-1.68387565271947,0.652895333440952,-2.5  
7908973532548,0.00990610498727478,0.176850160886058  
"867","MY05B",13.9762639898695,1.57523706699851,0.611057916348712,2.57  
788504960562,0.00994070604912418,0.176850160886058  
"868","GFRA2",3.67015701318385,-2.31825911120403,0.900300014304224,-2.  
57498508760509,0.0100244408526842,0.178026216295076  
"869","ZNF706",882.585352469687,-0.554564963618947,0.21556847417906,-2  
.57256987938925,0.0100946575072336,0.178675511736037  
"870","LINC02762",237.355832324882,-0.822608704229543,0.31976622387803  
3,-2.57253156463238,0.0100957749414264,0.178675511736037  
"871","JUNB",17734.1696737166,-0.546486116748162,0.212365721219136,-2.  
57332545766299,0.0100726438661577,0.178675511736037  
"872","UBAC2",216.678166112629,-0.623077607347616,0.242334556298524,-2  
.5711463394435,0.0101362485165579,0.179186090461858  
"873","AOPEP",41.1358757968253,-1.02852978662976,0.40016135347298,-2.5  
7028765447539,0.0101614100906351,0.179219835866293  
"874","MTMR3",148.34210444654,0.476039892725831,0.185199830702606,2.57  
041213763449,0.0101577589858764,0.179219835866293  
"875","LMTK2",33.8221791493235,0.783470974752259,0.305180796249486,2.5  
672355023013,0.0102512963466288,0.180598552209467  
"876","AGAP2-  
AS1",34.3535696163706,-0.849253792873802,0.330928585200335,-2.56627511  
449241,0.0102797259116628,0.180892665443245  
"877","EGR2",84.1351676828953,-1.35028316288928,0.526360261400842,-2.5  
6532124840821,0.010308031860638,0.181183935155911  
"878","ZNF429",83.9122114921717,0.707202934251217,0.275789999167748,2.  
56428056269387,0.0103389932886506,0.181521163490375  
"879","PREPL",169.81025653158,0.520451776612375,0.203020383419192,2.56  
354444734624,0.0103609433939175,0.181699593193674  
"880","PTPN6",6.63505331860863,-1.83536510096028,0.716066268582619,-2.  
56312185266484,0.0103735634056846,0.181714181702987  
"881","HIST2H3PS2",9.42976887554456,1.54979519643513,0.605033285034571  
,-2.56150402757854,0.0104220032855998,0.182148251529287  
"882","HINT3",60.6134890357721,0.595262454756551,0.23242350025729,2.56  
111130801146,0.0104337921570133,0.182148251529287  
"883","BBOX1-  
AS1",11.7907916785105,-1.55083819286786,0.605369287560344,-2.561805206  
73221,0.0104129703558401,0.182148251529287  
"884","CYP27C1",55.8051660441606,0.936532855194277,0.36586776083045,2.  
55975780174926,0.0104745134144666,0.182652289914031  
"885","SLC37A3",192.262080695125,0.547989693107201,0.214465172763412,2

.55514536950816,0.0106143458546898,0.184464646392382  
"886","AC099518.5",59.9565264029723,-1.04075502286127,0.40730191450219  
8,-2.55524215773272,0.0106113946117874,0.184464646392382  
"887","SNHG16",425.199654795416,-0.459687404834569,0.179856975623524,-  
2.55584974250198,0.0105928849494508,0.184464646392382  
"888","WDR34",103.047817031953,-0.48583219658591,0.190213279440724,-2.  
55414447411022,0.010644907744938,0.184579587050866  
"889","REPS2",38.7653949516035,0.87139061394194,0.341142831103158,2.55  
432779028102,0.0106393044213647,0.184579587050866  
"890","PCNX4",197.201689434493,0.607286919695964,0.237831610700517,2.5  
5343231249723,0.010666700902677,0.184749656645805  
"891","FZD1",153.418501333,0.691329505399293,0.27093607400604,2.551633  
28816776,0.0107219304065249,0.185497819547229  
"892","IFT57",436.131634711047,-0.451624145177817,0.177153445777722,-2  
.54933875655164,0.0107927407010257,0.185680912841865  
"893","HLA-  
DQA1",56.4328968692647,-1.16608958992749,0.457140736120764,-2.55083281  
315678,0.0107465863767315,0.185680912841865  
"894","UHRF1BP1",30.9723096322007,1.01365114165238,0.397562703561325,2  
.54966356897213,0.0107826916477357,0.185680912841865  
"895","DHCR7",29.4695198232839,-0.904576110933833,0.354691738065703,-2  
.55031627143869,0.0107625234734187,0.185680912841865  
"896","EXOSC6",200.899774415137,-0.444474984688542,0.174322942038,-2.5  
4972168030329,0.0107808946756365,0.185680912841865  
"897","SBF2",271.528457234146,0.504667961404513,0.198008243214682,2.54  
872197849535,0.0108118455098092,0.185802228019743  
"898","ADAMTS19",5.0486717750185,-1.9999787607182,0.784880878248187,-2  
.54813031651638,0.0108302005884834,0.18591040319763  
"899","LAPTM5",42.1071187032826,-1.08264633916754,0.425056735575392,-2  
.54706312958899,0.0108633778849913,0.186065522330156  
"900","C8orf82",157.730802763097,-0.473520638884629,0.185905943006301,  
-2.54709790998225,0.0108622951904532,0.186065522330156  
"901","DYRK3",92.8078209747229,-1.0976753540548,0.431115759697669,-2.5  
4612671739156,0.0108925639613054,0.186358350125996  
"902","IRAK1",144.408322225406,-0.705939046486846,0.277425882608495,-2  
.54460412939578,0.0109401687520514,0.186965300790323  
"903","COL8A2",118.155408124982,-0.665278857029468,0.261548440756539,-  
2.54361622307945,0.0109711551535588,0.187080040588615  
"904","GRIA1",33.7174456925821,1.47024768210095,0.577931231399705,2.54  
398378599495,0.01095961717648,0.187080040588615  
"905","TRIM59",4.50417110005543,-2.03949964296809,0.802059209577786,-2  
.54282928069825,0.010995893952984,0.187284049314098  
"906","LRR6",31.7975869156635,0.800565586972847,0.314877940180116,2.5  
4246323675424,0.0110074180135305,0.187284049314098  
"907","AC005062.1",3.4168361837611,-2.79009933223534,1.09812029340591,  
-2.54079571153505,0.0110600521551629,0.187972110222531  
"908","CPPED1",53.9934977327407,-0.696633572603352,0.274302885111121,-  
2.53965091297214,0.0110963161611948,0.188380741877553  
"909","UPP1",92.647698668416,-1.01667251981918,0.400671730207021,-2.53  
742014514945,0.0111672841973256,0.188714340470211

"910", "MPDZ", 207.114096573882, 0.600768129758394, 0.236824722422808, 2.53  
676273157762, 0.0111882754448792, 0.188714340470211  
"911", "SUSD1", 24.290691355512, 1.09305945276401, 0.430599815453637, 2.53  
845778269198, 0.0111342235519485, 0.188714340470211  
"912", "METTL7A", 1082.40881117908, 0.569979588821795, 0.2246532568218, 2.5  
3715257408405, 0.0111758235296648, 0.188714340470211  
"913", "LINC02254", 23.306769358025, 0.992599865865128, 0.391170286487021,  
2.53751345681023, 0.011164307587984, 0.188714340470211  
"914", "MT-  
ND1", 33375.8420267803, -0.451093468253797, 0.177825001344185, -2.53672692  
165874, 0.0111894198631056, 0.188714340470211  
"915", "SCART1", 2.80733136093225, 2.94187260608842, 1.16012652024849, 2.53  
582049435288, 0.0112184222318429, 0.188990120808919  
"916", "AC110048.2", 8.00656756981339, 1.87653021352195, 0.740117187302311  
, 2.53545012292148, 0.0112302919663295, 0.188990120808919  
"917", "EPB41L3", 446.414858339511, 0.394132051782302, 0.15550033933645, 2.  
5346057343935, 0.0112573947987263, 0.189239630122536  
"918", "RTCA-  
AS1", 50.7245264209178, 0.780552269468099, 0.3083481161831, 2.531399507576  
69, 0.0113608366784626, 0.19011310784153  
"919", "HRH1", 94.4479062002078, -0.725015600702102, 0.286440213608358, -2.  
53112365602895, 0.0113697757248662, 0.19011310784153  
"920", "PRPH2", 8.92748642723235, 1.75862764000398, 0.694811697944215, 2.53  
108524972644, 0.0113710207868888, 0.19011310784153  
"921", "VWA2", 3.16261759755061, -2.81143100575986, 1.1106587053666, -2.531  
31856993989, 0.011363458838184, 0.19011310784153  
"922", "ITGAM", 7.17155623602559, -1.6648971880793, 0.657464555426078, -2.5  
3229953514428, 0.0113317144069924, 0.19011310784153  
"923", "ZNF91", 196.995498918557, 0.499121553976788, 0.197231412955912, 2.5  
3063924501904, 0.0113854883098453, 0.190148756550667  
"924", "AL512353.1", 4.3750086828772, 2.32486545649088, 0.918952548323919,  
2.52990805752834, 0.0114092419622622, 0.19033924767129  
"925", "KIDINS220", 581.621209567829, 0.462474185684404, 0.1828578833809, 2.  
.52914546058183, 0.0114340628515629, 0.19034133785836  
"926", "SESN3", 377.363681447969, 0.753931964460895, 0.298072436429833, 2.5  
29358210679, 0.0114271334776982, 0.19034133785836  
"927", "ETHE1", 142.722877551053, -0.720579915885961, 0.285261427448946, -2.  
.52603347858842, 0.0115358487586746, 0.191828596132653  
"928", "MLLT3", 86.9943943451246, 0.545335680262512, 0.215943403708289, 2.5  
2536391896086, 0.0115578533694773, 0.191987402683721  
"929", "AN01", 5.00120350278022, -2.46235019856939, 0.97536042543643, -2.52  
455413850485, 0.0115845159982843, 0.192223158356892  
"930", "YWHAQ", 1516.32306137658, -0.37893959446811, 0.15033621151629, -2.5  
2061423289924, 0.0117150206241524, 0.193133258635451  
"931", "PCBP4", 72.6681629809001, -0.648904238416782, 0.25725042869568, -2.  
52246125188937, 0.011653678831839, 0.193133258635451  
"932", "EFNA5", 189.629747353769, 0.464300565831413, 0.184130659153534, 2.5  
215820546445, 0.011682842435436, 0.193133258635451  
"933", "KRT7", 7.76974312173344, -1.58256781894694, 0.627940175109659, -2.5  
2025253627159, 0.0117270664990452, 0.193133258635451

"934", "ALDH2", 513.538875662896, -0.686837346402946, 0.272421603459967, -2.52122936536448, 0.0116945595755948, 0.193133258635451  
"935", "TBC1D4", 130.416888226084, 0.651561798154662, 0.258498469785247, 2.52056346289384, 0.0117167107961766, 0.193133258635451  
"936", "LTBP2", 643.709711003696, 0.874548285018784, 0.346941425728122, 2.52073756595477, 0.0117109156739156, 0.193133258635451  
"937", "RELL1", 129.384892495813, 0.493200515752553, 0.195896778994321, 2.51765505428168, 0.0118138957734851, 0.193456863397896  
"938", "PDGFC", 35.6660148952292, -1.43472603284448, 0.569656237568173, -2.51858215222787, 0.0117828392957942, 0.193456863397896  
"939", "AL158206.1", 35.3829961495252, 0.920895787999581, 0.365853281131292, 2.51711775045993, 0.0118319279053975, 0.193456863397896  
"940", "HSPA12A", 112.805006291526, 0.68861194065031, 0.273580138458991, 2.51703922853863, 0.0118345651757519, 0.193456863397896  
"941", "AC006517.2", 2.53211486944318, -2.41126992126059, 0.957185784443281, -2.51912424991042, 0.0117647133532862, 0.193456863397896  
"942", "XYLT1", 102.351943669064, -0.741894203681695, 0.294647060434641, -2.51790804424557, 0.0118054137714056, 0.193456863397896  
"943", "ZGPAT", 96.7536776761097, -0.542444325633008, 0.21549060432981, -2.51725279308602, 0.0118273935257475, 0.193456863397896  
"944", "SPATA18", 6.9376792017391, 1.76469024596789, 0.701484599238289, 2.51565073258071, 0.011881285974773, 0.194014855191871  
"945", "TEX26-AS1", 38.5950104177631, -1.20134982438527, 0.47763630630544, -2.51519787864918, 0.011896559158618, 0.194058687227616  
"946", "DOCK7", 174.903118720921, 0.582909390033714, 0.231878281735458, 2.51385936479699, 0.011941804384623, 0.19420696504117  
"947", "PM20D2", 47.0536063870872, 0.852873067059987, 0.339220522293843, 2.51421423825651, 0.0119297939066955, 0.19420696504117  
"948", "HTRA1", 3340.17730555807, -0.580650244888193, 0.231018231458082, -2.51343905294137, 0.0119560434527454, 0.19420696504117  
"949", "MEIS2", 227.288826571493, 0.468942125074666, 0.186560292759231, 2.51362236914941, 0.0119498313284648, 0.19420696504117  
"950", "AC079922.2", 19.9979835641135, -0.945128410238567, 0.376276440281703, -2.51179268500305, 0.0120119631612954, 0.194909907506703  
"951", "TDRD10", 19.5828620634371, 0.920827047545943, 0.366790662059626, 2.51049752023472, 0.0120561168889586, 0.195420653883593  
"952", "ZBTB37", 82.1137360398177, 0.808506900370427, 0.322150863037976, 2.50971514633228, 0.0120828586022735, 0.19564838797694  
"953", "HSD11B1", 119.845745650309, -0.706073753067389, 0.281428804714747, -2.50888942865339, 0.0121111388255104, 0.195825280122077  
"954", "LSAMP", 120.093761931953, 2.65090262263759, 1.05682011873931, 2.50837637894315, 0.0121287399347307, 0.195825280122077  
"955", "CISD2", 161.67199694774, -0.442178739886642, 0.176313307696012, -2.50791472104317, 0.0121445973270649, 0.195825280122077  
"956", "PEG10", 180.713849214817, 0.981036218214816, 0.391168551465894, 2.50796290892611, 0.0121429412730117, 0.195825280122077  
"957", "TBC1D1", 47.0736118972978, -0.726949580097124, 0.290127365462712, -2.50562224262349, 0.0122236136526658, 0.196893421583953  
"958", "SLC12A7", 64.4304423657381, 0.611192054335483, 0.244132790012523, 2

.50352299789033,0.012296368862667,0.197858586657632  
"959","ITGA4",33.4567140993349,-1.08955161955297,0.435697840523168,-2.  
50070465863379,0.0123946494631874,0.198817400078079  
"960","RBM5",342.640112491617,0.515944008897429,0.206298624655684,2.50  
095709439919,0.0123858182893188,0.198817400078079  
"961","UBAC1",204.411240170907,-0.530177306516981,0.212004803369179,-2  
.50077969032497,0.0123920239837812,0.198817400078079  
"962","LPP",1251.4291574983,0.506840885611665,0.202839013210376,2.4987  
3472361054,0.0124637571569484,0.198982267566317  
"963","STOX2",21.0375871343407,1.10819404636878,0.443661084798925,2.49  
783919378692,0.0124952860852543,0.198982267566317  
"964","TPPP",30.9636208692528,-1.50877863229056,0.603908409282269,-2.4  
983567194961,0.012477056948969,0.198982267566317  
"965","RIPOR2",55.2208689220815,0.844032228846213,0.337738744760861,2.  
49906841290548,0.0124520269834551,0.198982267566317  
"966","GTF2I",662.534483873541,0.429257390820607,0.171845360606459,2.4  
9792830778624,0.0124921454864803,0.198982267566317  
"967","ITGBL1",468.647435288478,-0.918569499176796,0.367448312438479,-  
2.49986043773324,0.0124242240838587,0.198982267566317  
"968","VPS18",45.2830152372013,0.665204800745187,0.266252709031307,2.4  
983963662393,0.0124756614182609,0.198982267566317  
"969","NT5DC2",94.9129636466578,-0.671966134019655,0.269117619492624,-  
2.49692359529091,0.012527594569337,0.19929088780839  
"970","TTC9C",90.6692503818021,0.542484395105431,0.217348405627998,2.4  
9592074778739,0.0125630666445554,0.199597390304644  
"971","Z83843.1",86.8176516386512,0.837056613856246,0.335406629746286,  
2.49564719245242,0.0125727580918462,0.199597390304644  
"972","CFAP36",352.211830058645,-0.528782369053537,0.212039889646559,-  
2.49378723001103,0.0126388280393841,0.200439850027886  
"973","GALNT17",49.1422576047293,1.18897767876382,0.477077657511754,2.  
49220993698394,0.0126950975930823,0.201125312844157  
"974","SLC39A4",51.0655786629245,-0.736292614622047,0.295571650583044,  
-2.49107995699059,0.0127355455793929,0.201558968281664  
"975","FAM53C",324.000644555056,0.72349738586179,0.290531846489472,2.4  
9025156658001,0.0127652704883964,0.201822199567826  
"976","SUSD3",3.17715975249833,-2.16623836843067,0.870049378943425,-2.  
48978784521554,0.012781936867958,0.201878644282349  
"977","RCAN3",20.0004438625502,-0.946209764214592,0.380143830630519,-2  
.48908357303912,0.0128072855965722,0.202071962611219  
"978","IL1B",93.4801706022745,-2.06323046652316,0.829256412014146,-2.4  
880488551326,0.0128446086836818,0.202453622555168  
"979","PTTG1",18.0104896119237,-1.23952274929156,0.498263919788353,-2.  
48768313350498,0.0128578235513887,0.202454903007822  
"980","MAP3K1",55.780344569056,0.744407615508116,0.299431818614743,2.4  
8606717533213,0.0129163581817007,0.20305357179704  
"981","PLEKHG2",94.2042613782913,1.22487825565334,0.492729004679914,2.  
48590654095762,0.0129221896810182,0.20305357179704  
"982","ECHDC2",276.310779231777,0.402965263234007,0.162366441328743,2.  
48182604691153,0.0130711067698938,0.203965039048045  
"983","NOTCH2",505.717215626042,0.405346284100582,0.163298293469585,2.



48224445882577,0.0130557673561946,0.203965039048045  
"984","RREB1",140.089924468161,0.663233767153628,0.26720695851778,2.48  
209766254832,0.0130611472456282,0.203965039048045  
"985","SMO",58.8308539561738,0.627590315697269,0.252879165127666,2.481  
77945138513,0.0130728159960732,0.203965039048045  
"986","OMG",18.9748200200393,-1.48836847086793,0.599339550852665,-2.48  
334765952033,0.0130153991810906,0.203965039048045  
"987","C2CD2",105.359947920337,0.658983545173202,0.26538787480094,2.48  
309590506909,0.0130246016118637,0.203965039048045  
"988","ARMCX2",122.145859304781,0.628874125990727,0.25337770692483,2.4  
819631277873,0.013066079488469,0.203965039048045  
"989","KIF1C",55.1492894967107,-0.694530626472972,0.279922133786372,-2  
.48115651691558,0.0130956855929354,0.204115261289281  
"990","ADH1B",3946.93946940839,0.788794676807993,0.318021587010417,2.4  
8031803193962,0.0131265244889023,0.20438926767316  
"991","SLC1A7",15.1057748785293,1.53116190576082,0.617608508300327,2.4  
7917877617103,0.0131685284256401,0.204836393220224  
"992","TMEM200A",9.40891460137423,-1.20780132051424,0.487255659119863,  
-2.4787835665078,0.013183127399957,0.204856762974131  
"993","ZNF728",6.32297160980763,2.24953443685458,0.907734961808531,2.4  
7818419637898,0.0132052953347831,0.204994589713676  
"994","PHLDA2",28.3217422363473,-1.27869088178511,0.516105128526532,-2  
.47757832873263,0.0132277370723009,0.205136385281205  
"995","DAPK3",148.811867008198,-0.442761582883983,0.178760807548954,-2  
.47683812215232,0.0132552005703237,0.20535569526788  
"996","AL162457.2",9.01468018924299,2.81710019849311,1.13766188810019,  
2.4762191895146,0.0132782031893488,0.205505524260855  
"997","AL020997.5",12.2875297489544,1.4057015808528,0.567880029723343,  
2.47534955849324,0.0133105826303379,0.205593818884428  
"998","GNG10",492.52657256052,-0.507119768649037,0.204863541784619,-2.  
47540272042252,0.0133086012224288,0.205593818884428  
"999","ST6GALNAC4",86.9030334616331,-0.663015461697224,0.2679458719749  
73,-2.47443805276893,0.0133445961140036,0.205856107401548  
"1000","KIAA1755",26.6766957010326,-0.991080590062998,0.40056945803591  
1,-2.47417912219895,0.0133542722933213,0.205856107401548  
"1001","IQCN",56.5398676839358,0.982379530681771,0.397314472080134,2.4  
7254907564413,0.013415329307458,0.206590710563901  
"1002","ACTR1B",116.771432321236,-0.480745934082884,0.194593548997391,  
-2.47051321361804,0.0134919334410294,0.207563027937593  
"1003","SPOCK1",572.554862971946,-0.570796270837415,0.231184420523606,  
-2.46900837670907,0.0135488046796565,0.208230133735697  
"1004","LCOR",153.067388835649,0.535580279958975,0.217069932448196,2.4  
6731674865561,0.0136129879587168,0.209008176676912  
"1005","GIPC2",5.68380280038074,-1.63651713099022,0.663609239683089,-2  
.46608551106333,0.0136598719768015,0.209188241725161  
"1006","RAP2B",191.49490801529,-0.463467644093053,0.187949009053147,-2  
.46592225427481,0.0136660992928504,0.209188241725161  
"1007","USP32",63.5546513331429,0.57306576969489,0.232425946803369,2.4  
6558431868925,0.0136789975776168,0.209188241725161  
"1008","SLC2A11",38.4588849932513,0.652725626774214,0.264636413820983,

2.46649966778858,0.0136440855014835,0.209188241725161  
"1009","KDM3B",118.324903757336,0.523337333438564,0.212322993792062,2.  
46481704167705,0.0137083228438884,0.209428936212626  
"1010","EEF1AKMT4",7.30741120667889,-1.53709517731604,0.62392175453629  
7,-2.46360247281075,0.0137548570913255,0.209931804022558  
"1011","FAM172A",212.442960043287,0.425062508741912,0.172680301203962,  
2.46155760546102,0.0138335180933686,0.209994735065999  
"1012","C8orf48",27.6257093528221,-0.856664040098872,0.347840921142108  
,-2.46280408091746,0.0137855221288145,0.209994735065999  
"1013","ANXA2",9717.63526376877,-0.510805751369782,0.207477213412199,-  
2.46198482700341,0.0138170511878826,0.209994735065999  
"1014","BCLAF3",119.326738193218,0.503893290750025,0.204715963748529,2  
.46142646388341,0.0138385763132401,0.209994735065999  
"1015","RTL5",46.3064936689764,0.754768075695123,0.306624850833475,2.4  
6153589196536,0.0138343554848791,0.209994735065999  
"1016","CCNQ",71.9329373760791,-0.73890164237142,0.300199217681518,-2.  
46137097917198,0.013840716887905,0.209994735065999  
"1017","LONP2",249.419345834104,0.482780053627644,0.196329792147682,2.  
45902594988991,0.0139314547515664,0.210956164042628  
"1018","DLGAP1-  
AS1",76.0958124711525,0.676457559935186,0.275078937042399,2.4591397916  
8431,0.0139270376925952,0.210956164042628  
"1019","HMCES",89.0916603484252,-0.530127971407561,0.215702305349109,-  
2.45768338242636,0.0139836397084544,0.211538573214744  
"1020","LRATD1",3.23636264277444,-2.35613490968277,0.959019533166991,-  
2.45681639236487,0.0140174308206191,0.211841858921416  
"1021","ELL2",104.138817155963,1.23063760721683,0.501166415214739,2.45  
554684004419,0.0140670419173617,0.211968182948319  
"1022","BOP1",41.2005059847578,-0.662280484837367,0.269699898682171,-2  
.45562007280483,0.0140641759485039,0.211968182948319  
"1023","CYBB",9.54147926840941,-1.58281910214184,0.644482233254067,-2.  
45595459497774,0.0140510909539437,0.211968182948319  
"1024","GALNT2",200.741244147781,0.531024608576734,0.216329380051098,2  
.45470406493701,0.0141000610921877,0.212258243882884  
"1025","SLC25A37",253.233117813702,0.389289847967676,0.158650831045856  
,2.45375234028971,0.0141374310292236,0.212613170063884  
"1026","ESRRG",3.98434242044984,2.97632665985793,1.21422422297044,2.45  
121667279601,0.0142374222165991,0.213908248995004  
"1027","ATP23",35.6185530258082,-0.97072367927232,0.396093671681704,-2  
.45074271232584,0.0142561813714039,0.213981534411092  
"1028","ALDOA",68.3625559054473,-0.85963734479742,0.350869694461061,-2  
.45001879149987,0.0142848759404197,0.214203660137714  
"1029","SOX9",105.055173232663,-0.869990135866798,0.355245860811531,-2  
.44898035934712,0.0143261259809871,0.214405079608656  
"1030","ZNF626",108.849423105622,0.469312788581637,0.191615286798777,2  
.44924502852677,0.0143156024601084,0.214405079608656  
"1031","EVA1B",570.890062169779,-0.555542835753453,0.226913878352618,-  
2.44825411202992,0.0143550373869657,0.214629390223159  
"1032","FCGR2B",14.3178568693691,-1.86587749257326,0.762590712543496,-  
2.44676136475611,0.0144146242752758,0.214629637334005

"1033", "PNMA2", 14.4118721482183, 1.67605955743218, 0.685090254254117, 2.4  
4647993023483, 0.0144258828741549, 0.214629637334005  
"1034", "NDE1", 93.2811018725886, 0.499274120489203, 0.204055299008957, 2.4  
4675890758067, 0.0144147225393846, 0.214629637334005  
"1035", "SMG6", 197.575212355867, 0.480719035463513, 0.196465917225634, 2.4  
4683170624157, 0.0144118115221876, 0.214629637334005  
"1036", "ZNF681", 20.7073926369071, 0.950310632028593, 0.388336585573164, 2  
.44713134773533, 0.0143998351453994, 0.214629637334005  
"1037", "KCNB1", 12.436242095777, 1.1554651523638, 0.47235831479145, 2.4461  
6240718435, 0.0144385944803998, 0.214629637334005  
"1038", "AL357568.2", 14.1017854896884, 1.31260641414784, 0.53717677100761  
4, 2.44352787572275, 0.0145444459451703, 0.214793951120817  
"1039", "TTC32", 88.4443365241222, -1.10614679599942, 0.45259382436631, -2.  
44401654739362, 0.0145247603291053, 0.214793951120817  
"1040", "DTNB", 11.5472899241605, 1.34906478510685, 0.5522238439987, 2.4429  
6728540036, 0.0145670576959715, 0.214793951120817  
"1041", "MMS22L", 35.7216337210995, 0.784218202012163, 0.321022988266404, 2  
.44287241311632, 0.0145708874920663, 0.214793951120817  
"1042", "GARS-  
DT", 263.85099660649, 0.73205667160519, 0.299659581134405, 2.4429610053978  
, 0.0145673111791354, 0.214793951120817  
"1043", "VOPP1", 106.331849849086, -0.537764673308373, 0.220102752990393, -  
2.44324373958123, 0.0145559028782559, 0.214793951120817  
"1044", "SERTM1", 2.98046242999391, -3.43101186441999, 1.40455834492434, -2  
.44276919988312, 0.0145750550030733, 0.214793951120817  
"1045", "NQ01", 150.09603144011, 0.788378429449458, 0.322534141027808, 2.44  
432551213698, 0.0145123261404657, 0.214793951120817  
"1046", "AC009271.1", 11.1440006616632, 1.44643533806853, 0.59147452234457  
8, 2.44547361454374, 0.0144662033240473, 0.214793951120817  
"1047", "NCS1", 66.6727777540105, -0.702237943593816, 0.287546690784476, -2  
.442170145231, 0.0145992641976891, 0.214945231716693  
"1048", "PARD6G", 7.31210947377914, 1.65974389319947, 0.679888232901548, 2.  
44120108700251, 0.0146385011600121, 0.215317266585484  
"1049", "ELM02", 49.8038314610486, 0.640554960838212, 0.262458693812229, 2.  
44059341885045, 0.0146631529115528, 0.215474263233162  
"1050", "ANGPT1", 264.399193724567, 0.878934376966502, 0.36021606374117, 2.  
4400199364736, 0.0146864513789559, 0.215611093339624  
"1051", "NE01", 74.6561959651437, 0.621906939232928, 0.25508014268813, 2.43  
808448858088, 0.0147653225377587, 0.216562746831161  
"1052", "RPS6KA1", 3.83678560864842, -1.8650439869832, 0.765954665113238, -  
2.43492738138421, 0.0148947786024969, 0.218046545258774  
"1053", "MIR99AHG", 669.944579034024, 0.395281170227424, 0.16232224952222,  
2.4351632101631, 0.0148850740811897, 0.218046545258774  
"1054", "CRAT", 190.187040771707, -0.483054495034662, 0.19841531684198, -2.  
43456252633647, 0.0149098036302079, 0.218059414572728  
"1055", "KLF4", 4145.75396812811, 0.754052378491467, 0.310017043495804, 2.4  
3229330229282, 0.0150035522757578, 0.21922251974484  
"1056", "UGGT1", 144.030269824686, 0.522718472083165, 0.214988270925299, 2.  
43138134854246, 0.0150413739263424, 0.219359299029866  
"1057", "ADAMTS1", 890.404483059305, 1.02566080588076, 0.421798466241906, 2

.43163711575123,0.0150307579743188,0.219359299029866  
"1058","DCHS1",111.281932940092,-0.574618576214334,0.236376597972372,-  
2.43094528453064,0.0150594885617772,0.219415894309825  
"1059","ZNF516",67.6479668876215,0.599469047131382,0.246702512717699,2  
.42992679939727,0.015101872557066,0.219825651999219  
"1060","SCAP",96.2547920678798,0.494215634338081,0.203474162977585,2.4  
2888643504347,0.0151452754841645,0.220041867661071  
"1061","GM2A",89.7539671065628,0.525150758637301,0.216195778757833,2.4  
290518605617,0.0151383667658004,0.220041867661071  
"1062","WDR19",67.2497944250184,0.692757564566624,0.285299275897234,2.  
42817848866941,0.0151748730504677,0.220057072505136  
"1063","RANBP3L",7.99870131519749,-1.35807332499049,0.559289868165868,  
-2.4282101326887,0.0151735490020726,0.220057072505136  
"1064","KAZN",142.489806629662,0.631348981305725,0.260144280065934,2.4  
2691855898468,0.0152276737397831,0.22061521682214  
"1065","SUOX",31.5861626715886,0.792429454150731,0.326913961412119,2.4  
2396944666357,0.0153518970217448,0.222063659895725  
"1066","MEOX1",3.68539508583492,-3.04289098296577,1.25538980524807,-2.  
42386147334092,0.0153564619817608,0.222063659895725  
"1067","USP22",336.907578725097,0.401759251815419,0.165795807311389,2.  
42321719909875,0.0153837258345696,0.22249422436636  
"1068","PCDHB3",12.7303651214481,1.11058268126926,0.458938878813659,2.  
41989234849765,0.0155251024196914,0.222864338054035  
"1069","KCTD16",25.3390609053762,1.46772190844881,0.606541892893775,2.  
41981951394386,0.015528212186577,0.222864338054035  
"1070","NOTCH4",20.8066084346531,-0.829796742200866,0.342742726334727,  
-2.42104843791922,0.0154758150006673,0.222864338054035  
"1071","LPCAT3",86.12210417196,0.791116085453304,0.326941996502906,2.4  
1974446206171,0.0155314171986273,0.222864338054035  
"1072","RAB20",15.0420625489893,-1.09049217970086,0.450710115340919,-2  
.41949790471422,0.0155419502697429,0.222864338054035  
"1073","NRXN3",3.98677620601188,-2.84101702672834,1.17374870145026,-2.  
42046446843181,0.0155006940622018,0.222864338054035  
"1074","SRPX2",568.727662948591,0.47427704536846,0.195989583126052,2.4  
199094554093,0.0155243720971234,0.222864338054035  
"1075","SLITRK4",137.904582673687,-0.689881745636228,0.285131625899687  
, -2.41952026001822,0.0155409949792887,0.222864338054035  
"1076","FBLL1",5.96950476311941,2.46750957960964,1.0202633731365,2.418  
50255980866,0.0155845359095039,0.223113223996696  
"1077","CAPN1",375.418178084064,-0.470641460544955,0.194607340945802,-  
2.41841576097599,0.015588254443363,0.223113223996696  
"1078","ZNF624",42.2386062981942,0.698296555147537,0.288978502653961,2  
.41643080275669,0.0156735050238537,0.223894514712876  
"1079","NBR2",17.0411637057681,1.0951764754855,0.453245746739509,2.416  
297303094,0.015679253299855,0.223894514712876  
"1080","PNMA6A",29.420849632553,1.08764207316984,0.450158558636162,2.4  
1613105494439,0.0156864142646712,0.223894514712876  
"1081","C9orf16",659.226721270524,-0.736607026554993,0.305119074756204  
, -2.41416249424444,0.0157714269429719,0.224070549609136  
"1082","CHST15",8.60395297637304,2.17891966428246,0.902344499590868,2.

41473147480857,0.0157468138664519,0.224070549609136  
"1083","SULT1A1",167.324450185053,1.63307554681237,0.676107282123762,2  
.41540890031922,0.0157175537219639,0.224070549609136  
"1084","MAP2K4",77.5253659116334,0.469182069483888,0.194329034178418,2  
.41436937855165,0.0157624735874133,0.224070549609136  
"1085","ADGRE5",173.407556925795,-0.557031759721578,0.230689086195671,  
-2.41464288106418,0.0157506440503432,0.224070549609136  
"1086","BMPER",96.2330766937764,1.06053730113312,0.43951995689395,2.41  
294458760837,0.0158242251583231,0.224588587905497  
"1087","HSPA5",989.196233978944,-0.515811531888985,0.213794614737427,-  
2.41264978784653,0.0158370285470824,0.224588587905497  
"1088","NT5E",840.132566655083,0.42926537808824,0.177969565473047,2.41  
201565530176,0.0158646003093309,0.224750510809436  
"1089","IFIT2",138.971752011268,0.703634260117609,0.291756579447998,2.  
41171685467687,0.0158776066345427,0.224750510809436  
"1090","AC096576.6",2.36622052383606,-3.09060764179498,1.2822576615337  
8,-2.41028596241581,0.0159400211987813,0.225426997045151  
"1091","DHRS9",3.08122104064407,-2.74226461732558,1.13852484548617,-2.  
40861201070634,0.0160133115819644,0.226048716150166  
"1092","DIP2A",121.079493288555,0.643376236560996,0.267084189941698,2.  
40888925960552,0.0160011524011471,0.226048716150166  
"1093","SAMD11",12.290059074901,-1.90409742469099,0.79081389387962,-2.  
40776931137332,0.0160503193519681,0.226156922130337  
"1094","GULP1",300.643713017316,0.752355440096045,0.312440538765598,2.  
40799559195641,0.0160403746946463,0.226156922130337  
"1095","SLC6A15",5.01488988923991,-2.91168462430253,1.21010488920367,-  
2.40614235202256,0.0161219812437469,0.226390146360953  
"1096","ZBTB4",277.951191529393,0.461233992545039,0.191649131818389,2.  
40665839792123,0.016099220824473,0.226390146360953  
"1097","MED29",246.503116274573,0.453247101157881,0.188377307223134,2.  
40605998588253,0.0161256166528917,0.226390146360953  
"1098","ARHGEF6",124.676129145402,0.522519685542751,0.217106536470706,  
2.40674322402658,0.0160954822379929,0.226390146360953  
"1099","GPAM",41.3669453505148,0.674592762672733,0.280537478741143,2.4  
0464399159726,0.0161882274155464,0.226855932373316  
"1100","AL139384.1",11.7710162080827,1.36234617090882,0.56652458089670  
8,2.40474326595409,0.0161838308651899,0.226855932373316  
"1101","HLA-  
DRA",505.728056423288,-0.990616703203831,0.412017411236238,-2.40430786  
706692,0.01620312111309,0.226858412314516  
"1102","AMPD2",52.8895316919871,-0.605082220436442,0.251928262648301,-  
2.40180364868849,0.0163144627570058,0.22705526629059  
"1103","KCNIP3",24.3977550805828,0.811907718912052,0.337945798055728,2  
.40247910636298,0.0162843647897446,0.22705526629059  
"1104","TTPA",5.90965085148592,1.86614077935115,0.776375892139943,2.40  
365626785173,0.0162320278163189,0.22705526629059  
"1105","NAALADL1",89.5249862507301,-0.564044104619609,0.23480994522513  
3,-2.40213038710439,0.0162998974016152,0.22705526629059  
"1106","GLYR1",133.274254316167,0.489739313869188,0.203943924236226,2.  
40134299515552,0.0163350172115643,0.22705526629059

"1107", "SMURF2", 465.344375727308, 0.603754625519111, 0.251405872170444, 2.4015136174297, 0.0163274013593831, 0.22705526629059  
"1108", "DOCK11", 230.487934096724, -0.452585125709171, 0.188410060777682, -2.40212822946439, 0.0162999935474694, 0.22705526629059  
"1109", "AL592183.1", 23.5745643238778, -1.30147703050409, 0.541686602521537, -2.40263839726835, 0.0162772740015908, 0.22705526629059  
"1110", "NAA10", 225.580401603739, -0.554420843613869, 0.230987657283614, -2.40021847978281, 0.0163852889101134, 0.227548854549007  
"1111", "SHPRH", 226.110890184047, 0.432015821283998, 0.180098666682429, 2.39877301282735, 0.0164501084334596, 0.228243403691971  
"1112", "WDR1", 267.856298084983, -0.430682959631313, 0.179620977302723, -2.39773196927586, 0.016496931701534, 0.228687232175492  
"1113", "AZIN2", 32.3523471389634, -0.790785669352771, 0.329858771120905, -2.39734619354087, 0.0165143125346938, 0.22871978178994  
"1114", "PPM1G", 341.470327241539, -0.398400438035002, 0.166212483736726, -2.39693450863807, 0.0165328784243418, 0.22871978178994  
"1115", "NDST1", 129.297033522034, 0.568196433593771, 0.237100839464994, 2.39643366457866, 0.0165554898691471, 0.22871978178994  
"1116", "AC016885.2", 6.63230297485355, 1.6640854750657, 0.694420947863865, 2.39636416525834, 0.0165586296774293, 0.22871978178994  
"1117", "SGMS1", 144.098394004801, 0.471743693883251, 0.196914334851846, 2.39567979770585, 0.0165895756604921, 0.228942084875995  
"1118", "ARHGAP15", 16.7194487278915, 1.21630795750224, 0.507806076487293, 2.395221352836, 0.0166103341854526, 0.229023525464  
"1119", "HAUS4", 157.806190219759, -0.528751673970615, 0.22085732056633, -2.39408715370978, 0.0166617891252841, 0.229527684867073  
"1120", "NPL0C4", 145.458586814365, 0.576778047841087, 0.240982263665731, 2.39344605311345, 0.016690935654336, 0.22972390456392  
"1121", "HMGCLL1", 35.0339350658075, -0.944158742861536, 0.394644535830568, -2.39242826680588, 0.0167372995009017, 0.230156531495451  
"1122", "SMG7", 81.572311266277, 0.564226594581934, 0.235935988053712, 2.39143930197493, 0.0167824586996261, 0.230346566526313  
"1123", "KLF10", 389.571932631365, -0.692470881642571, 0.289556386196456, -2.39148889354058, 0.016780191650244, 0.230346566526313  
"1124", "GPS2", 331.818745399725, -0.407577899426926, 0.170453072268331, -2.39114434256315, 0.0167959481528106, 0.230346566526313  
"1125", "LSM10", 237.52297089107, -0.578070239795298, 0.24184490190788, -2.39025191449141, 0.0168368197734978, 0.230701846051972  
"1126", "TMEM131", 168.964504274723, 0.460595744421532, 0.192761644038286, 2.3894574396245, 0.0168732787404155, 0.230996085065279  
"1127", "FKTN", 56.8033850828494, 0.634994073526777, 0.266079268799334, 2.38648458556034, 0.0170103204508509, 0.232665563220822  
"1128", "DANT2", 12.3549202003557, 1.39259193957871, 0.583869190290555, 2.38510947783647, 0.0170740394406053, 0.233330069128485  
"1129", "CYP4B1", 270.187147748334, 0.794389943552286, 0.333226188127713, 2.38393611263178, 0.0171285756884317, 0.233474942420047  
"1130", "TMEM64", 165.572951053754, 0.963834453911907, 0.404264834954936, 2.38416594908471, 0.017117881216345, 0.233474942420047  
"1131", "MAOA", 112.37733605918, -1.01211412791263, 0.424561644196381, -2.38390382585874, 0.017130078486998, 0.233474942420047

"1132", "AC008764.7", 8.32221830579518, 1.89153960634838, 0.79358723332071  
5, 2.38353079148382, 0.017147449886447, 0.233505247349453  
"1133", "ZNF721", 158.414265158254, 0.50187547198456, 0.210714202770846, 2.  
38178283848457, 0.0172290542847533, 0.233790380105169  
"1134", "ANKRD50", 93.1779969237252, 0.609985243906507, 0.256030324585048,  
2.38247264223533, 0.0171968097168392, 0.233790380105169  
"1135", "TGFB1I1", 408.897625247934, -0.671751805812999, 0.282015147894624  
, -2.38197065238496, 0.0172202697582661, 0.233790380105169  
"1136", "TPPP3", 2107.66112335044, -0.659182601042221, 0.276738949469083, -  
2.381965394849, 0.0172205156129297, 0.233790380105169  
"1137", "TNKS", 121.344550796314, 0.505806062984461, 0.212450059779157, 2.3  
8082334978041, 0.0172739933360548, 0.234078231443806  
"1138", "AL035681.1", 13.7304328340948, 1.24595326377897, 0.52335987467599  
8, 2.38068167635189, 0.0172806375207948, 0.234078231443806  
"1139", "VENTX", 4.32134392468398, -2.62774531399178, 1.10393157760737, -2.  
38035161534836, 0.0172961253796062, 0.234082328996162  
"1140", "ZNF518B", 53.3008051935162, 0.701128876968549, 0.29481497839396, 2.  
.3781996450385, 0.0173974037035133, 0.235246472008471  
"1141", "NFKBIZ", 2257.62525521219, 0.674425118250108, 0.283665933454823, 2.  
.37753300171139, 0.0174288833051363, 0.235259401180977  
"1142", "RBAK", 41.0172584519096, 0.766783831608286, 0.322486239242762, 2.3  
777257392712, 0.0174197769055948, 0.235259401180977  
"1143", "CTNND2", 7.37265925948001, 1.69929233562914, 0.714919620990065, 2.  
37689984403541, 0.0174588279123516, 0.235457421057656  
"1144", "QPCT", 39.4911572641092, -1.45817064674601, 0.613625645136087, -2.  
37631959860907, 0.0174863096855386, 0.235621908918337  
"1145", "PTGER3", 24.7199743153315, -1.72915508054572, 0.728151891283509, -  
2.37471755720877, 0.0175623831002496, 0.236233975122467  
"1146", "AL157392.3", 28.1648515662008, 0.937570873538231, 0.3947786298304  
1, 2.37492813109208, 0.0175523674042086, 0.236233975122467  
"1147", "FAM149B1", 66.4293444489951, 0.57209794547261, 0.241051467781214,  
2.37334354666475, 0.0176278593598427, 0.236907979103727  
"1148", "PRDM16", 5.86865116216548, -1.82172591927244, 0.768528032916837, -  
2.37040919946451, 0.0177684077482432, 0.237629444041217  
"1149", "KDM4A", 92.7728930346693, 0.517407135378172, 0.218281025796476, 2.  
37037155882068, 0.0177702170080089, 0.237629444041217  
"1150", "PRKACB", 112.018326854293, 0.475293211102851, 0.200807163289939, 2.  
.36691362656516, 0.0179371183971492, 0.237629444041217  
"1151", "UHMK1", 140.465371242224, 0.53215079764594, 0.22484170145474, 2.36  
67798019802, 0.0179436051160543, 0.237629444041217  
"1152", "ARL13B", 135.056892838459, -0.387650600615623, 0.163648078158637,  
-2.36880631277468, 0.0178455962223127, 0.237629444041217  
"1153", "HSP90AB1", 2562.7171952626, -0.341314212750915, 0.14395038537649,  
-2.37105452589263, 0.0177374141639729, 0.237629444041217  
"1154", "PLEKHA8", 46.6428735325223, 0.748003434376706, 0.315738157282445,  
2.36906251944574, 0.0178332386631514, 0.237629444041217  
"1155", "LINGO2", 9.06918587615419, 5.40576818935951, 2.28232081664885, 2.3  
6854001853115, 0.0178584482841693, 0.237629444041217  
"1156", "SPON1", 71.9065227637855, 1.84732222141368, 0.780372156351958, 2.3  
6723236006964, 0.0179216770817766, 0.237629444041217

"1157", "PTHLH", 43.5899400352665, -1.3312142702161, 0.56235212078014, -2.36722548208644, 0.0179220101685424, 0.237629444041217  
"1158", "TC2N", 87.2184036781282, 1.23336760708851, 0.520810856000825, 2.36816800740143, 0.0178764160987946, 0.237629444041217  
"1159", "IRX5", 76.09976985429, -0.840921366692402, 0.354723061128312, -2.37064194252716, 0.0177572241526429, 0.237629444041217  
"1160", "C16orf74", 31.8146136481221, 1.0083600415582, 0.425160587040912, 2.37171570529694, 0.0177057083438271, 0.237629444041217  
"1161", "SPATA33", 54.2419982521965, -0.612536746556185, 0.258510591234826, -2.36948414233352, 0.0178129189418537, 0.237629444041217  
"1162", "H0XB2", 178.049513148498, -0.620418227391592, 0.26184830426002, -2.36938035228025, 0.0178179191233068, 0.237629444041217  
"1163", "AC002398.2", 6.15598332297967, 1.6879114284163, 0.713051213163507, 2.36716717853652, 0.0179248339089646, 0.237629444041217  
"1164", "DDX17", 1312.01313984623, 0.454071828555529, 0.191806612099792, 2.36734189496703, 0.0179163732598776, 0.237629444041217  
"1165", "LINC01871", 11.4727690949648, 1.84162249819971, 0.778868325159756, 2.36448503387523, 0.0180551568384425, 0.237858785468832  
"1166", "EIF2A", 409.131634684756, -0.44513006153656, 0.188201475392387, -2.36517838453974, 0.018021388281096, 0.237858785468832  
"1167", "PHF1", 131.340676198317, -0.404301883888955, 0.171055583520904, -2.36357022417538, 0.0180997960009692, 0.237858785468832  
"1168", "F10", 1757.53232231098, 0.606040916846793, 0.256200647324039, 2.3654933083767, 0.0180060686872096, 0.237858785468832  
"1169", "GABRB3", 2.91245587769126, 2.87550820425896, 1.21625518089421, 2.36423100137986, 0.0180675429577549, 0.237858785468832  
"1170", "AP3S2", 105.077519286554, 0.477619978398188, 0.202056928761604, 2.36378916241821, 0.01808910387581, 0.237858785468832  
"1171", "PGP", 114.991404731132, -0.668920459916408, 0.282856035299046, -2.36487957278055, 0.0180359346504958, 0.237858785468832  
"1172", "FBX031", 53.5217035466156, 0.595884447159063, 0.25187664557151, 2.36577887484168, 0.0179921870568667, 0.237858785468832  
"1173", "NFATC1", 73.0025173000494, -0.853406101624612, 0.360974327889015, -2.36417394725921, 0.0180703258263948, 0.237858785468832  
"1174", "GBA", 125.996729587131, 0.477243348654461, 0.202042777624815, 2.36209061400197, 0.0181721998315412, 0.238281603453002  
"1175", "EXOC3-AS1", 21.1331748481408, 0.871567652607176, 0.369050277377873, 2.36165017622998, 0.0181938013145756, 0.238281603453002  
"1176", "AL590807.1", 9.41204951148044, 2.04695500267662, 0.866428050340104, 2.36252162181628, 0.0181510825907478, 0.238281603453002  
"1177", "AC104564.5", 7.6052664809537, 1.57767798641025, 0.668016806119385, 2.36173397429209, 0.018189689667068, 0.238281603453002  
"1178", "MID1", 99.8899643107288, 0.785445965412021, 0.332707968333446, 2.36076691924863, 0.0182371888450463, 0.238647084929023  
"1179", "WDR48", 143.70417016339, 0.496861959883912, 0.21053334633085, 2.36001549656224, 0.0182741716751087, 0.2389282072704  
"1180", "CAPN2", 910.968045579896, -0.426279454754079, 0.180759473270654, -2.35826895841749, 0.018360384944887, 0.239648885626954  
"1181", "DUSP14", 144.704628106423, -0.604466192126765, 0.256287550305883,



-2.3585468408642,0.0183466442353983,0.239648885626954  
"1182","PIK3AP1",5.57670454173683,-1.79081330197796,0.760037162526803,  
-2.3562180775796,0.0184620756192372,0.240772331362557  
"1183","ALYREF",122.500792826279,-0.684189255993843,0.290642347211567,  
-2.354059078307,0.0185696594928873,0.241970668709094  
"1184","JUND",11454.3013230706,-0.454744812046585,0.193218756122314,-2  
.35352313187813,0.0185964507773609,0.242115108727211  
"1185","TFRC",59.3934780916685,-0.771477010037379,0.327935526120147,-2  
.35252648337567,0.0186463619119071,0.242310072579924  
"1186","ZNF718",23.7837375556747,0.954553671856149,0.405781966106235,2  
.35238071572221,0.0186536716220568,0.242310072579924  
"1187","C5orf38",146.055610393951,-0.739648760515044,0.314480581178443  
, -2.35196958026274,0.0186743020580571,0.242310072579924  
"1188","PSMG1",90.8488275222816,-0.642886275618864,0.27330894589937,-2  
.35223283125013,0.0186610900446647,0.242310072579924  
"1189","PDXK",168.033279691084,-0.371401969111449,0.157939823370387,-2  
.35154099318238,0.0186958294497499,0.242385375078129  
"1190","ALDH6A1",138.227742737366,0.436646096076156,0.185741891651211,  
2.35082184312032,0.018732000235146,0.242650238340148  
"1191","AP000662.1",6.21419840634981,1.71803188760505,0.73101675514444  
, 2.35019495177726,0.0187635806481662,0.242855244073452  
"1192","RPRD2",192.772563558744,0.476510179943403,0.202789828832687,2.  
34977356944539,0.0187848344596135,0.242900689550127  
"1193","A1BG",21.5539417259548,-1.08930051839778,0.46363063423036,-2.3  
4950074040308,0.0187986067228869,0.242900689550127  
"1194","NCKAP5",21.6506760167571,1.08397046405237,0.461803433344054,2.  
34725509986581,0.0189123013613913,0.243798397652861  
"1195","EIF1B-  
AS1",17.2758793816543,1.12956966965516,0.481254960138102,2.34713356373  
722,0.0189184717363523,0.243798397652861  
"1196","P4HA1",282.037015676574,0.519771934249333,0.221514078904902,2.  
34645101033274,0.0189531576094227,0.243798397652861  
"1197","CCDC186",527.331719917122,-0.45110356085384,0.19224291753173,-  
2.34652889503398,0.0189491968703462,0.243798397652861  
"1198","KCTD21",24.8152654012093,0.838526970577662,0.357389073115541,2  
.34625799627224,0.0189629762429958,0.243798397652861  
"1199","IGF1R",178.214192882691,0.69281895939115,0.295239639673931,2.3  
466325868583,0.0189439248622395,0.243798397652861  
"1200","NAT14",53.8627646106733,-0.639650139431104,0.272776854655596,-  
2.34495753035468,0.0190292470147937,0.244446535610871  
"1201","AC106897.1",15.848302907386,-1.15300125206829,0.49207765548338  
5,-2.34312864894395,0.019122788036851,0.245443611647009  
"1202","HFE",40.5712297266924,0.830358956320967,0.354552819621578,2.34  
198943110149,0.0191812580872902,0.245548754429445  
"1203","ITGA8",4.7482194109614,-2.85314108548771,1.21832787198166,-2.3  
4184996592663,0.0191884268253862,0.245548754429445  
"1204","LINC01465",4.31878050467234,-1.76222572829882,0.75253219368913  
9,-2.34172802582685,0.0191946966647733,0.245548754429445  
"1205","RHBDL1",8.1385567996697,1.5355215108149,0.655626343547046,2.34  
206804825363,0.0191772180689318,0.245548754429445

"1206", "LZTS3", 34.6230302914073, 0.764443432075871, 0.326494191478628, 2.34136916376324, 0.0192131587992819, 0.245581130091983  
"1207", "PTPN20", 12.3868599603781, -1.29989828389687, 0.555307978357165, -2.34086008946335, 0.0192393754262466, 0.245712487320291  
"1208", "GBE1", 135.61315297253, -0.403173484664085, 0.172278729401982, -2.34023948321183, 0.0192713780820549, 0.245917461204367  
"1209", "MGP", 25088.155761124, -0.74600894586146, 0.318875339944093, -2.33950027616515, 0.0193095572977367, 0.246200848423996  
"1210", "B9D2", 36.3815148066253, -0.643055345593863, 0.274905539488718, -2.33918656855678, 0.0193257799119898, 0.246204047391175  
"1211", "AC015813.1", 16.7713979960931, 1.03706027789379, 0.443504516024938, 2.33833081833935, 0.0193700934931324, 0.246564815191277  
"1212", "PPM1K", 70.2007395204106, 0.589753542020207, 0.252284353657452, 2.33765405373084, 0.0194052014547566, 0.24680790464115  
"1213", "FMNL2", 171.576476637802, 0.678194280300482, 0.290182332130556, 2.33713153837138, 0.0194323455771391, 0.246949387528112  
"1214", "MRNIP", 126.969482121448, 0.50401511321939, 0.215713918130821, 2.33649788380241, 0.0194653077684597, 0.246996302240798  
"1215", "VASH1", 34.6430173950726, 0.851746504361215, 0.364548132869257, 2.33644456674995, 0.0194680835045456, 0.246996302240798  
"1216", "HDAC4", 156.152944885216, 0.475795772307794, 0.203817043287314, 2.33442583914379, 0.0195734351020693, 0.2477595403822  
"1217", "NUTM2A-AS1", 219.44937331728, -0.432045946580002, 0.185104828152871, -2.33406092586193, 0.0195925319316186, 0.2477595403822  
"1218", "TMEM25", 33.8767913360158, -0.711488347685354, 0.304715877230448, -2.3349237793319, 0.0195474028710076, 0.2477595403822  
"1219", "CMC4", 130.09037781706, -0.611914477669971, 0.262146827055331, -2.33424331144322, 0.0195829852022474, 0.2477595403822  
"1220", "RFTN2", 129.265997236354, 0.523928541570099, 0.224542398168054, 2.33331676264531, 0.0196315263035785, 0.247850991782939  
"1221", "MNT", 90.6332068337563, 0.599000838505293, 0.25671729603265, 2.3330923845938, 0.0196319209190379, 0.247850991782939  
"1222", "RIPK2", 122.950323469948, -0.695790804823333, 0.298315398170086, -2.33239989987586, 0.0196796633759447, 0.248047433311682  
"1223", "MMP14", 956.446147179535, 0.595544682196876, 0.255306310102457, 2.33266730445432, 0.0196656134806328, 0.248047433311682  
"1224", "SLC35E2B", 148.843287646991, 0.625167473272719, 0.268160829773376, 2.33131540427083, 0.0197367345460759, 0.248360622879804  
"1225", "HLA-DPB1", 285.992456716307, -0.501405142192678, 0.215060778405169, -2.33145786001037, 0.0197292296307056, 0.248360622879804  
"1226", "DHX57", 54.0401612697638, 0.629729550458854, 0.270295566289261, 2.32978128018918, 0.019817714056139, 0.249022087592891  
"1227", "MBTPS2", 46.9776229518494, 0.611494467108635, 0.262476912896936, 2.32970763165271, 0.0198216089183573, 0.249022087592891  
"1228", "KIAA0753", 31.8781043472878, 0.698761963805035, 0.299992247988684, 2.32926673435706, 0.019844939508332, 0.249112168176659  
"1229", "CLSTN1", 337.181937125033, 0.421766244919555, 0.181190411915173, 2.32775145473487, 0.0199253051738136, 0.249563159152152

"1230", "VPS45", 74.8149986335173, 0.473023594805635, 0.203217311091809, 2.32767372161485, 0.0199294355443594, 0.249563159152152  
"1231", "OPHN1", 147.500605337711, 0.501954235459319, 0.215610068939425, 2.32806490869562, 0.0199086572933671, 0.249563159152152  
"1232", "PTX3", 302.25677248087, 1.81170844950599, 0.778703903492999, 2.32656911231507, 0.019988210086465, 0.249690647068767  
"1233", "MXD4", 577.509500147297, 0.437714650252841, 0.188115162119126, 2.32684407424667, 0.0199735656641564, 0.249690647068767  
"1234", "HOXB5", 11.399756630357, -1.26156614040001, 0.542134161157155, -2.32703679418997, 0.019963307018527, 0.249690647068767  
"1235", "AP003068.2", 7.66396173499642, -1.45727685010309, 0.62648084771422, -2.3261315256805, 0.0200115351970386, 0.249779607337935  
"1236", "RABGAP1", 157.674799661655, 0.498535060910018, 0.214389415350929, 2.32537161451733, 0.020052097944955, 0.250083406004435  
"1237", "SRM", 429.808819528276, -0.677894900356974, 0.291849790622772, -2.32275273835362, 0.0201924393364193, 0.250415488633068  
"1238", "CDC42BPA", 262.134522343795, 0.494408899582873, 0.212779396331718, 2.32357506462751, 0.0201482801597368, 0.250415488633068  
"1239", "NECAB1", 18.6124688657651, 1.80295096842881, 0.776212645823321, 2.32275392333558, 0.0201923756418083, 0.250415488633068  
"1240", "CSAD", 246.993472648904, 0.64289751118658, 0.276782463646828, 2.32275377101532, 0.0201923838292476, 0.250415488633068  
"1241", "LYZ", 110.042280809702, -1.16812219450998, 0.502880984042565, -2.32286014300972, 0.0201866668823637, 0.250415488633068  
"1242", "TCFL5", 53.5853065580385, -0.579455397967658, 0.249434345204655, -2.32307783233391, 0.0201749716048952, 0.250415488633068  
"1243", "MIR155HG", 10.2300746438047, -1.24576108405455, 0.536273391567451, -2.3229962620621, 0.0201793532443837, 0.250415488633068  
"1244", "DCBLD2", 182.737501336008, 0.456896366204203, 0.196915988078771, 2.32026038445103, 0.0203267957822, 0.251676752596477  
"1245", "PSMG3-AS1", 27.726146410647, 0.948420023689447, 0.408725377719867, 2.32043341419205, 0.0203174430615519, 0.251676752596477  
"1246", "PIGW", 10.5255298918215, -1.09367248124181, 0.471602036229564, -2.31905801337431, 0.0203918909484442, 0.252280095481755  
"1247", "CHST3", 73.4160974523006, 0.585216295405624, 0.252603361411763, 2.31673993621833, 0.0205179026921494, 0.253432267627791  
"1248", "MAP2K3", 123.064391649033, -0.47174813438824, 0.203625639059165, -2.31674231480825, 0.0205177730436358, 0.253432267627791  
"1249", "ECHDC3", 4.3131498200613, -2.26586012860703, 0.978253117533149, -2.31623093041689, 0.0205456632360194, 0.253571976607877  
"1250", "DUSP10", 21.2018929404726, -0.930035805879144, 0.401823611140228, -2.31453747389319, 0.0206382581454266, 0.253618721148291  
"1251", "LINC01341", 15.6866351985935, 1.11736676815885, 0.482719991893994, 2.31473066564897, 0.0206276764415061, 0.253618721148291  
"1252", "TMEM161B-AS1", 124.946009005892, 0.50166035230422, 0.216686239430962, 2.31514633149583, 0.0206049251881285, 0.253618721148291  
"1253", "CRTAC1", 15.9394111695219, -3.38497892003381, 1.46215618822074, -2.31505973664338, 0.0206096631070481, 0.253618721148291

"1254","STX3",35.5601804321333,-0.940969424175608,0.406631989902604,-2.31405656107132,0.0206646197704997,0.253618721148291  
"1255","MLKL",24.513496526592,-0.862021508508711,0.372503240426342,-2.31413156976057,0.0206605061771532,0.253618721148291  
"1256","SCML1",121.925543136098,0.60337847956166,0.260713709072415,2.31433353354682,0.0206494337175488,0.253618721148291  
"1257","EMX20S",482.263217811611,-0.504984927422647,0.218469835715935,-2.31146293385441,0.0208072982475205,0.254833969333258  
"1258","LINC01578",835.034971229759,-0.431884542751451,0.186811667169299,-2.31187135844172,0.0207847735253594,0.254833969333258  
"1259","AHCY",109.919465016269,-0.411964657964952,0.178235097971175,-2.31135541009761,0.0208132317476855,0.254833969333258  
"1260","SHE",60.522277759958,0.577110824936042,0.249736394325396,2.31087994401044,0.0208394871504834,0.254939067610324  
"1261","AL592295.5",92.3609771823747,-0.717150213254182,0.310412077503499,-2.31031672163625,0.0208706258345793,0.254939067610324  
"1262","KDM5B",323.580257546546,0.372893101077618,0.161404471333781,2.31030217438328,0.0208714306405598,0.254939067610324  
"1263","AC026904.2",6.54659751908643,1.46347103900765,0.633678435710987,2.30948531074066,0.0209166658791427,0.254966968205868  
"1264","CFAP70",10.8142864815688,1.26033015555498,0.545641612577377,2.30981312001062,0.0208985026193158,0.254966968205868  
"1265","EPS8L1",3.97114360802717,-2.30489559946492,0.998064661512513,-2.30936500243579,0.0209233353733651,0.254966968205868  
"1266","KIAA1109",282.017323410509,0.532231103596997,0.230542342135786,2.30860456550546,0.0209655343749577,0.25507791033147  
"1267","AC005332.6",107.306272976973,0.536800162410697,0.232507617150818,2.30874226396848,0.0209578875660341,0.25507791033147  
"1268","SEC63",675.244278920825,0.274385041357232,0.118899177136864,2.30771186112911,0.0210151679292459,0.255480136931645  
"1269","HES4",24.1367124398345,-1.31427806894596,0.569840211652153,-2.30639755157931,0.0210884286795492,0.256116098208258  
"1270","COL24A1",10.1147902833291,1.4038032586483,0.609053478270219,2.30489326263313,0.0211725520390608,0.256116098208258  
"1271","EMP1",2792.33581419979,-0.691657856549201,0.300108479748551,-2.30469281350768,0.0211837836662685,0.256116098208258  
"1272","WNT3",6.96022275818169,1.66209442421857,0.720740110803982,2.30609397104944,0.0211053821205266,0.256116098208258  
"1273","SMAD7",162.683459066608,-0.775072249816285,0.336148829401935,-2.30574133247844,0.0211250901120702,0.256116098208258  
"1274","SLC2A10",160.775455674072,0.461594960243936,0.200243869576522,2.30516400437188,0.0211573899900086,0.256116098208258  
"1275","CLCN5",36.0057449962981,0.819412244009796,0.355532493908485,2.3047464241643,0.0211807792290975,0.256116098208258  
"1276","NPAS2",50.6796465967282,1.10487413994537,0.479670723288031,2.30340124235999,0.0212562779195457,0.256791163111126  
"1277","CDK14",187.544199364645,0.397191526486545,0.172521351415669,2.30227460675033,0.0213196909111656,0.257355548469552  
"1278","URGCP",91.8446844955818,0.49584763355189,0.215592325023422,2.29993175080802,0.0214520869417143,0.258548803914407

"1279", "CRNDE", 461.009648606902, -0.465074894280968, 0.202203364034804, -2.30003539506355, 0.0214462148503713, 0.258548803914407  
"1280", "LINC01816", 4.53511276632342, 1.82021485196104, 0.791739063023071, 2.29900852057366, 0.0215044554797536, 0.258610350107499  
"1281", "USP40", 82.3003038960634, 0.57699606064824, 0.250981940067501, 2.29895450044357, 0.0215075231163032, 0.258610350107499  
"1282", "NF1", 304.828515927058, 0.453646903939318, 0.197285338325323, 2.29944560396706, 0.0214796488698009, 0.258610350107499  
"1283", "NQ02", 350.267761543244, -0.518563087672803, 0.225637996422453, -2.2982081736886, 0.0215499437199321, 0.25891845864595  
"1284", "CD52", 49.4142822889447, -0.792594626242904, 0.34495991316627, -2.29764269989503, 0.0215821332742642, 0.259103258896248  
"1285", "ARHGAP4", 12.3603815997545, -1.60164747416939, 0.697373192419636, -2.29668632459507, 0.0216366701352486, 0.259555852245025  
"1286", "BMP1A", 159.909840884552, 0.450498563821114, 0.196273318382928, 2.29526136070209, 0.0217181505612635, 0.260330708321833  
"1287", "SNHG9", 345.192290687251, -0.923598420631756, 0.403224468123864, -2.2905316855624, 0.0219905139549816, 0.263390654713319  
"1288", "NRARP", 2.44942460750161, -2.86091323508254, 1.24954393974147, -2.28956593209075, 0.0220464917802629, 0.263856110863938  
"1289", "BCL7B", 170.168741770493, -0.580274317377327, 0.253527660360449, -2.28880082178146, 0.0220909277158764, 0.263979402187751  
"1290", "LILRB4", 3.53141824731377, -2.41667686384519, 1.05587123879781, -2.2887988374385, 0.0220910430633927, 0.263979402187751  
"1291", "HECW1", 5.25709691477845, 1.83035083756844, 0.800030080014304, 2.28785252366476, 0.0221461108986775, 0.264432455075998  
"1292", "AP000525.1", 30.7684203693284, 1.06254504461593, 0.46478883356419, 2.28608126505084, 0.0222495048090623, 0.265461390581808  
"1293", "CROT", 65.7337098606042, -0.496961804078975, 0.217445421713007, -2.28545535778115, 0.0222861412191928, 0.265692859159982  
"1294", "DENND11", 42.7398160032634, 0.804891942119515, 0.352313860450824, 2.28458778513445, 0.0223370098396581, 0.26609351366177  
"1295", "CES2", 122.38538516483, 0.485931024989178, 0.212759156824897, 2.28394881912935, 0.022374539033549, 0.266334763862671  
"1296", "HLA-DMA", 36.3949430178902, -1.0819311065295, 0.473864674886773, -2.28320692355475, 0.0224181824870949, 0.266366749665539  
"1297", "CDKN1C", 2096.92290046423, 0.647452814545975, 0.283594630167249, 2.28302212268315, 0.0224290652653824, 0.266366749665539  
"1298", "MBD2", 422.532568602586, -0.39322845420429, 0.172199341737199, -2.28356537392816, 0.0223970867130152, 0.266366749665539  
"1299", "TAFA2", 11.9917130862151, 1.26262567284646, 0.553214608860946, 2.28234333045935, 0.022469078232943, 0.266431416123704  
"1300", "CAMTA2", 72.9705008014443, -0.537947289364951, 0.235677049923056, -2.2825611977941, 0.0224562287855237, 0.266431416123704  
"1301", "AADAC", 930.341013826773, -1.72479373435774, 0.756465327127312, -2.28006978311573, 0.02260355002769, 0.267614227094349  
"1302", "C19orf54", 16.5399636871524, 0.965423626244478, 0.423402104078949, 2.28015783800749, 0.02259832892019, 0.267614227094349  
"1303", "ARL3", 345.648649768372, -0.509309123168293, 0.223511831940364, -2

.27866739199822,0.022686844518646,0.268394250387512  
"1304","PALM2-  
AKAP2",131.459554781162,-0.69585200792029,0.30551425194649,-2.27764172  
534304,0.0227479323575161,0.268910565407294  
"1305","PCDHB13",18.6512636133069,1.00989868189084,0.443647655475302,2  
.27635302345707,0.0228248889182367,0.269613534616566  
"1306","GCK",3.9350386860438,-1.85732586427099,0.81609008612438,-2.275  
88338083047,0.022852990438794,0.269734911388064  
"1307","AL353748.3",2.4779255021153,2.74606532455053,1.20674518500256,  
2.27559667001672,0.0228701608293351,0.269734911388064  
"1308","CLIC1",2433.32796025825,-0.549618043030684,0.241628384765183,-  
2.27464187853926,0.0229274217236657,0.270203521307575  
"1309","LINC00852",4.60478600123951,-1.77392180400541,0.78001709180114  
2,-2.27420888933247,0.0229534300327606,0.270303379644771  
"1310","KIAA0319L",107.34433171567,0.53625567768053,0.23589885718452,2  
.2732440677365,0.0230114760425962,0.270441806213095  
"1311","CCNI",3651.04178046169,-0.350171701479881,0.154015427219374,-2  
.27361445409692,0.0229891776399168,0.270441806213095  
"1312","SYCE1",3.29723420217904,3.1068996875329,1.36678837673348,2.273  
1387977985,0.0230178170451885,0.270441806213095  
"1313","LINC00377",13.8871091927867,1.81381783313153,0.798142975447578  
,2.2725475120725,0.0230534617308906,0.270578990420873  
"1314","MMP2",8478.12150344655,-0.536817082694876,0.236237388165843,-2  
.27236292638835,0.0230645989888438,0.270578990420873  
"1315","AMPH",82.8937263783355,1.22788557445571,0.540425897413104,2.27  
207019562408,0.0230822709259202,0.270580385036548  
"1316","BIVM",82.0139017781912,0.526589936618031,0.231812775027307,2.2  
7161741433793,0.0231096281531214,0.27069522642885  
"1317","ARMCX4",40.5056389129205,0.784711336911594,0.345630414360768,2  
.27037698161746,0.0231847198763827,0.271368608120303  
"1318","ARRDC4",61.1853357639972,0.623292198487374,0.274688923031879,2  
.26908384804086,0.0232632274060537,0.272080918409953  
"1319","RHOB",3965.59267760426,0.550134330656806,0.242584766308424,2.2  
678024635618,0.0233412491964778,0.272786471845114  
"1320","AMIG02",31.1758483743353,0.807304258266027,0.356257854212216,2  
.26606725640112,0.0234472656626331,0.273817878931431  
"1321","DEPTOR",116.449900962931,0.84059590906722,0.371139503496869,2.  
26490551705529,0.0235184781503729,0.274441590225586  
"1322","PRRX2",661.567283849302,-0.529189872193553,0.233947979514159,-  
2.26199804457608,0.0236975241110632,0.276321735379757  
"1323","SPPL3",251.905698078655,0.393367768418144,0.17396668314729,2.2  
6116726088924,0.0237489016028944,0.276711502803187  
"1324","AC009088.1",4.43372735585759,2.26876984690849,1.00353605457871  
,2.2607756209227,0.0237731549761345,0.276784882142835  
"1325","NCSTN",234.322570082819,0.460084632396368,0.203565516951558,2.  
26013049403575,0.0238131530671152,0.27683239406454  
"1326","C17orf80",46.4998457351797,0.751120121999334,0.332319388874936  
,2.26023562616146,0.0238066308601136,0.27683239406454  
"1327","HCFC1R1",781.944481242852,-0.611798939689526,0.271162374618548  
, -2.25620881418435,0.0240575568133332,0.279252438461997

"1328", "MSL1", 248.011285865388, 0.463017936863665, 0.205212610893202, 2.2562840307345, 0.0240528488472872, 0.279252438461997  
"1329", "RHOU", 226.560385114972, 0.645765613517184, 0.2865589569007, 2.25351746286876, 0.0242265409234593, 0.281002353901524  
"1330", "ITIH4", 20.4368418058801, 1.46306101983133, 0.649615658366645, 2.25219481856389, 0.0243099633204217, 0.281381883064617  
"1331", "AKR1C2", 951.582631873112, -0.763463483500017, 0.33899610462139, -2.25213054985601, 0.0243140232398359, 0.281381883064617  
"1332", "SLC6A2", 3.5268920677611, -2.54162106229101, 1.12849768033461, -2.2522164702522, 0.0243085956936582, 0.281381883064617  
"1333", "AC007098.1", 16.1114264690205, 1.00064699780088, 0.444744356972235, 2.2499374800687, 0.0244529143109445, 0.281930945477344  
"1334", "AUP1", 393.445219106205, -0.412694109471321, 0.183375454180003, -2.25054171681132, 0.0244145784542971, 0.281930945477344  
"1335", "CAP2", 7.90863107205962, -1.62595581228361, 0.72259365429033, -2.25016619317047, 0.0244383974556287, 0.281930945477344  
"1336", "NUMA1", 539.787738845024, 0.393577138744959, 0.174889567209677, 2.25043234438962, 0.0244215137346817, 0.281930945477344  
"1337", "SLC7A7", 23.8337139002427, -0.837910783326315, 0.372275262559663, -2.25078286847498, 0.0243992931123764, 0.281930945477344  
"1338", "TXLNB", 7.15372987951084, -1.60366213265269, 0.712871890803441, -2.24957969775647, 0.0244756384226371, 0.281982037582176  
"1339", "PTRH2", 68.4058975229983, -0.617242362542249, 0.274438089846173, -2.24911331691684, 0.0245052875111048, 0.282112775940016  
"1340", "PER2", 231.031222016864, -0.792804526395525, 0.352676577641402, -2.24796478319476, 0.0245784356236068, 0.282443840659437  
"1341", "HAND2", 83.9611495361869, -0.885692214053058, 0.394076775650485, -2.24751182708264, 0.0246073355825899, 0.282443840659437  
"1342", "ALG10B", 40.3494669957577, 0.622512013752216, 0.276976921686646, 2.24752304257496, 0.0246066196452271, 0.282443840659437  
"1343", "CCL3L1", 23.5542550339229, -2.4411366697284, 1.08604811999798, -2.24772422582247, 0.0245937802419223, 0.282443840659437  
"1344", "METAP1D", 34.059649115174, 0.673351909697474, 0.299717310327957, 2.24662335639099, 0.0246641081965209, 0.282884842149829  
"1345", "NGF-AS1", 10.6674883211567, 1.23402143780936, 0.549922901645414, 2.24398990134266, 0.0248330511079997, 0.284471218146417  
"1346", "BHMT2", 244.490678796651, 0.416818704119311, 0.185756997743559, 2.2438923388218, 0.0248393292004591, 0.284471218146417  
"1347", "RNF19B", 79.6198307887952, -0.720229449010493, 0.321198988699025, -2.24231543171319, 0.0249409930955709, 0.284834517014325  
"1348", "SAMD9L", 135.050790081773, 0.702879746564447, 0.313468727795499, 2.24226432890936, 0.0249442937344822, 0.284834517014325  
"1349", "DCT", 2.86382490255857, 2.84840223807071, 1.27032988712724, 2.24225397429023, 0.0249449625669373, 0.284834517014325  
"1350", "GATD3B", 209.263293334696, -0.540332396575638, 0.240970767038933, -2.24231512898964, 0.024941012646831, 0.284834517014325  
"1351", "UBE3D", 42.3200398906333, 0.636757831520284, 0.284077123095883, 2.2414963393774, 0.0249939423811558, 0.285182547598457  
"1352", "PIK3IP1", 278.396128238907, 0.544028052804869, 0.242783112117754,

2.2407985796846,0.0250391250023073,0.285486769164621  
"1353","DDX59",99.3005694207649,-0.483655508571336,0.215922612805202,-  
2.23994838839633,0.0250942737183147,0.285763456525424  
"1354","LINC00173",13.1340774290489,1.79188098540614,0.799999371866512  
,2.23985299041602,0.0251004683837447,0.285763456525424  
"1355","ECSIT",152.254770763999,-0.518588845964753,0.231595266474824,-  
2.23920313164573,0.0251427021822419,0.286033028885061  
"1356","SND1",202.917408551013,-0.383800736736062,0.171523860039964,-2  
.23759386388949,0.0252475520721585,0.287014023003188  
"1357","TMEM161B",51.2513454348159,0.645402799951608,0.28864070077063,  
2.23600759777978,0.0253512734751356,0.287980752114381  
"1358","SLC19A3",22.1933713832007,0.946891983477634,0.42357931938639,2  
.23545376306221,0.0253875738896114,0.288180744851516  
"1359","IGF2BP2",63.3805149348927,-0.724689977047103,0.324302998675065  
, -2.23460769714684,0.0254431150766862,0.288386484490528  
"1360","AC100814.1",5.57549222076976,1.67966614444718,0.75160844539698  
1,2.23476220196013,0.0254329645510675,0.288386484490528  
"1361","FLVCR2",23.4286093337167,0.984297099814608,0.440612641138421,2  
.23392841674142,0.0254877834562728,0.28868051578137  
"1362","DENND5B",82.1555515224644,0.600977645218935,0.269173759931221,  
2.23267544864885,0.02557035463028,0.289403095907317  
"1363","AKIRIN1",250.364786863796,-0.432833624238512,0.193960473318144  
, -2.23155582595716,0.0256443339633469,0.289602496736258  
"1364","CD3E",11.0588555149677,1.20557522151063,0.540183791567031,2.23  
178710714986,0.0256290368499529,0.289602496736258  
"1365","MBNL2",513.11923710281,0.450457030812313,0.201806765592441,2.2  
3212056092329,0.0256069958588309,0.289602496736258  
"1366","CDC14B",169.389302797257,0.440302396210393,0.197422882633746,2  
.23025006187976,0.0257308464368282,0.29036676268207  
"1367","GLUL",1458.73166090881,0.489381160542855,0.21952177039074,2.22  
930582088408,0.0257935636151522,0.290670516276395  
"1368","NR4A1",556.162337299043,-1.60510855983029,0.720262280783618,-2  
.22850564669858,0.0258468152126442,0.290670516276395  
"1369","ZFYVE1",77.2675453258515,0.569958406399668,0.255703728898407,2  
.22897964317962,0.0258152592773887,0.290670516276395  
"1370","ZNF99",4.90835884330413,2.10067972200329,0.942439368072285,2.2  
2898129383128,0.0258151494448185,0.290670516276395  
"1371","PFKL",223.830738081578,-0.385656728745404,0.173062301497874,-2  
.22842713524263,0.0258520452685656,0.290670516276395  
"1372","CD01",312.522380458317,-0.749594069410182,0.336492522827975,-2  
.22766931969361,0.0259025743634776,0.29102637304155  
"1373","TNFSF12",523.874316330016,-0.518140762786571,0.232672701962163  
, -2.22690826391328,0.0259534054301231,0.291385101751892  
"1374","FLYWCH1",96.5238829147142,0.427227374297351,0.191921039770214,  
2.22605804349991,0.0260102937915226,0.291811265499505  
"1375","AGPAT2",193.445311119446,-0.615869597330571,0.276752280130996,  
-2.22534606413743,0.0260580153301911,0.292134040956288  
"1376","FAS",139.323544842086,-0.39619533209452,0.178120353107777,-2.2  
2431252342505,0.0261274247021473,0.292699310889245  
"1377","CD58",126.143800494625,-0.433973546904316,0.195337361035171,-2



.22166176815596,0.0263061721246253,0.293490692200762  
"1378","TIA1",196.940234230432,0.45248112892292,0.203668141779948,2.22  
165884643756,0.0263063697253791,0.293490692200762  
"1379","CAMK2A",3.16896950418093,-2.21572206563749,0.997364951443623,-  
2.22157602633858,0.0263119715221877,0.293490692200762  
"1380","SETX",317.347157468946,0.414338685058376,0.186515227951709,2.2  
2147376173303,0.0263188899313123,0.293490692200762  
"1381","RBMS2",127.135945593082,0.452300443164825,0.203504960189773,2.  
22255242694352,0.0262459951257591,0.293490692200762  
"1382","CPEB1",53.3138430038991,0.685125016985634,0.308440734894152,2.  
22125335429754,0.0263338062889664,0.293490692200762  
"1383","MN1",97.5810693517654,0.757611648170204,0.340917929243598,2.22  
226988721636,0.0262650719107963,0.293490692200762  
"1384","HEPH",60.5514669706174,-0.691986188145685,0.31156394271881,-2.  
22100857405766,0.0263503806685602,0.293490692200762  
"1385","SIGIRR",258.37121811233,-0.512355957557119,0.230844997934455,-  
2.21948043986899,0.0264540564952567,0.294432693772117  
"1386","DNAJC18",81.0793375597194,0.535327511893898,0.241526942871209,  
2.21642979259401,0.0266620811877833,0.296300736210836  
"1387","UST",191.830957741215,0.509595700594857,0.229943861898079,2.21  
617440182305,0.0266795602893701,0.296300736210836  
"1388","FUT11",135.693265869306,0.492917782419986,0.222377925841401,2.  
21657694015697,0.0266520148096079,0.296300736210836  
"1389","LPIN1",122.088547710577,0.607345701539007,0.274175768395529,2.  
21516914165385,0.026748457092189,0.296852027412594  
"1390","CITED4",188.678336389295,1.00831123821524,0.455469216705614,2.  
21378569886303,0.0268435243182014,0.297263201314014  
"1391","NUDT17",8.9821840077664,1.1536338955688,0.521449786619414,2.21  
23585533477,0.0269419002762703,0.297263201314014  
"1392","AC092053.4",7.97773728381756,-1.21298734057564,0.5478124772575  
13,-2.21423824927859,0.0268123939646229,0.297263201314014  
"1393","MYO10",8.71411888571817,2.30362245792782,1.04051440365811,2.21  
392654424488,0.0268338324045547,0.297263201314014  
"1394","AHS1",298.800581585088,-0.464195356104814,0.209718423285405,-  
2.21342192465891,0.0268685704928681,0.297263201314014  
"1395","EHD4",164.636884186356,0.595423843129607,0.269066735257652,2.2  
1292253967939,0.0269029864498843,0.297263201314014  
"1396","AC015908.2",16.8434847879699,-1.04653865690703,0.4730952080111  
42,-2.21211003448248,0.0269590629540702,0.297263201314014  
"1397","RAD23A",575.227119745872,-0.425660293651396,0.192378052644988,  
-2.21262398594347,0.0269235799570915,0.297263201314014  
"1398","LSM14B",62.9043069198009,0.517758560748916,0.233988728905086,2.  
21275000369328,0.0269148859012982,0.297263201314014  
"1399","TNIK",15.7200330587582,0.956868364583989,0.432704086960432,2.2  
1136890872835,0.0270103010497116,0.297615289979488  
"1400","ANP32B",553.186971296989,-0.48509618292712,0.21946278369023,-2.  
21038015999938,0.0270787895557391,0.298156815001227  
"1401","LINC00622",5.2867558758931,1.66693532345263,0.754435126676906,  
2.20951446255565,0.0271388775876052,0.298328786009644  
"1402","TSPAN17",46.5419557840855,-0.549071426295314,0.248519327194148

, -2.20937112817133, 0.0271488375188668, 0.298328786009644  
"1403", "RGS14", 14.0892264482715, -1.02213466563585, 0.462821781627668, -2  
.20848435879826, 0.0272105269626701, 0.298328786009644  
"1404", "ZNF727", 54.4253142229987, 0.695293759680053, 0.314823042154587, 2  
.2085224604959, 0.0272078738757673, 0.298328786009644  
"1405", "SPATA20", 120.33304166238, -0.420340518968349, 0.19032625509734, -  
2.20852618969133, 0.0272076142174537, 0.298328786009644  
"1406", "ZNF358", 369.473137513296, -0.38430498656957, 0.173956375274905, -  
2.20920323249004, 0.0271605081621921, 0.298328786009644  
"1407", "DDX39A", 88.815140139178, -0.577123783884335, 0.261390686357452, -  
2.20789727410225, 0.0272514349141855, 0.298564939020732  
"1408", "MTUS1", 364.3816409132, 0.659193311229045, 0.29860826914107, 2.207  
55209869163, 0.0272755114378883, 0.298616483533414  
"1409", "HSPD1", 562.258549482453, -0.364799062375264, 0.165312467967629, -  
2.20672443440078, 0.0273333170993683, 0.298824881621818  
"1410", "WDFY1", 166.156968123133, 0.397596237464351, 0.180173339432803, 2.  
20674289945454, 0.0273320263126796, 0.298824881621818  
"1411", "C9orf72", 30.9067196175912, -0.726107097998371, 0.329121855904765  
, -2.20619531936669, 0.0273703268704958, 0.299017426441313  
"1412", "RCC1", 29.5469117753671, -0.675401768769267, 0.306532320945433, -2  
.20336232957796, 0.0275692210658172, 0.300744737793846  
"1413", "RRS1", 39.5114640895893, -0.72502717072307, 0.32909251989648, -2.2  
0311045341029, 0.0275869645955562, 0.300744737793846  
"1414", "GAREM1", 69.3615297940744, 0.712597344347392, 0.323373931397292, 2.  
.20363262204926, 0.0275501911416589, 0.300744737793846  
"1415", "TNKS2", 186.197749236142, 0.413626826576558, 0.187770708855779, 2.  
20282933955504, 0.0276067794175605, 0.30074805987399  
"1416", "POPDC2", 8.03710205064935, -1.24146318719244, 0.56403818156569, -2  
.20102685911496, 0.027734122452615, 0.300859604227347  
"1417", "BTN3A3", 95.4891408533536, 0.572791757845382, 0.260237229104515, 2.  
.20103695315378, 0.0277334079131477, 0.300859604227347  
"1418", "AC091182.1", 4.29964854510436, 2.09357809294624, 0.95092270083418  
3, 2.20162805148061, 0.0276915927642502, 0.300859604227347  
"1419", "C8orf31", 18.8403441742216, 0.860256349649626, 0.390720827201392,  
2.20171613530655, 0.0276853662443466, 0.300859604227347  
"1420", "ZNF512B", 47.6143963191396, 0.673803371599992, 0.305954905887825,  
2.20229634705395, 0.0276443820668751, 0.300859604227347  
"1421", "LINC01278", 79.1731682747373, 0.5395972282161, 0.245097395658777,  
2.20156247179111, 0.0276962292830995, 0.300859604227347  
"1422", "DNAJC2", 166.473615267235, -0.40684424686638, 0.18487576203956, -2  
.20063594263549, 0.0277618069660195, 0.300948139508573  
"1423", "SUSD5", 4.87688106830916, 2.37745511704472, 1.08063576463191, 2.20  
005222375231, 0.027803190007142, 0.301184943049961  
"1424", "ATP1A1-  
AS1", 46.7583306413697, 1.15652640006721, 0.525978543861866, 2.19880908368  
564, 0.0278915003349713, 0.301351746161826  
"1425", "THNSL1", 17.1296518798561, 0.906497896687708, 0.412436083107213, 2.  
.19791122507597, 0.0279554328259105, 0.301351746161826  
"1426", "LUM", 13068.0506249294, -0.596093857294782, 0.271058267301201, -2.  
19913549669526, 0.0278682891893489, 0.301351746161826

"1427", "ZFYVE26", 33.6071905910174, 0.673942380220919, 0.306533212962998, 2.198594970204, 0.0279067349404367, 0.301351746161826  
"1428", "TLCD2", 90.0946897334861, 0.582697620956026, 0.265109853138428, 2.19794780940024, 0.0279528253532675, 0.301351746161826  
"1429", "HOXB7", 30.0769202101403, -1.09967970905516, 0.500012882825951, -2.19930275164119, 0.027856402187228, 0.301351746161826  
"1430", "AC011043.1", 15.5403754331641, 1.10599418695409, 0.503143219375672, 2.19816971463209, 0.0279370140053986, 0.301351746161826  
"1431", "NLRP3", 24.1661919204179, -1.20716190610093, 0.549531393047797, -2.1967114552015, 0.0280410602289016, 0.302063552360949  
"1432", "GALNT11", 364.928965621602, 0.328442629444897, 0.149636549179604, 2.19493587125348, 0.0281681982150807, 0.303221211931193  
"1433", "CYP7B1", 240.725719156747, 0.524971505687864, 0.239238015543712, 2.19434818707542, 0.0282103877235495, 0.303463452029669  
"1434", "GHR", 174.47250524493, 0.61458623343656, 0.280179651866318, 2.19354342595085, 0.0282682493924566, 0.303662065773323  
"1435", "ZFP36", 16856.8464241933, -0.46675477807412, 0.212761583665414, -2.19379255424293, 0.028250326352657, 0.303662065773323  
"1436", "AASS", 203.971573675722, 0.684603292294337, 0.312297366928925, 2.19215198330552, 0.0283685342577293, 0.304527127843243  
"1437", "SH2D3C", 7.66718275094375, -1.37258955049052, 0.626335772951463, -2.19145961282478, 0.0284185492889302, 0.304851730889951  
"1438", "CXCL14", 8342.58434038536, -0.965192942573515, 0.440493018122352, -2.1911651328499, 0.0284398447660252, 0.304868016041918  
"1439", "LPP-AS2", 25.6165193498674, 0.842668470102574, 0.384799660349479, 2.18988880951, 0.0285323017531592, 0.305052850516102  
"1440", "ADD1", 647.057669858059, 0.337269908144904, 0.15396234772537, 2.190599929968, 0.0284807562299123, 0.305052850516102  
"1441", "EPB41L4A", 61.40212113368, 0.537714496115054, 0.245495921472224, 2.19031946799936, 0.0285010759113433, 0.305052850516102  
"1442", "ADAL", 48.5219156568975, 0.620689173271209, 0.283441138899347, 2.18983445974517, 0.0285362445957975, 0.305052850516102  
"1443", "DISP1", 40.9990406264994, 0.832726938280142, 0.380427704459995, 2.18892296359481, 0.0286024397047831, 0.305222642664325  
"1444", "GUCY1A2", 66.9325770869138, 0.931064557833523, 0.425511421442563, 2.18810708929278, 0.0286618026398859, 0.305222642664325  
"1445", "FAM20A", 133.846647751792, 0.57228922665823, 0.261526909643802, 2.18826134349878, 0.0286505709919905, 0.305222642664325  
"1446", "GNA15", 2.66940425402317, -2.49826084157734, 1.14151633804338, -2.18854584758681, 0.0286298654553662, 0.305222642664325  
"1447", "MAVS", 203.305356842299, 0.625071773445594, 0.285719662366922, 2.18771003811027, 0.0286907304067861, 0.305222642664325  
"1448", "AP1S2", 159.916228213814, -0.63656037323593, 0.290942607740916, -2.18792420326, 0.0286751239578391, 0.305222642664325  
"1449", "RENBP", 41.3461257944669, 0.935542784961999, 0.427436839787863, 2.1887275449311, 0.0286166486954097, 0.305222642664325  
"1450", "AC068587.4", 24.4368939033476, 0.847787233426194, 0.38768771510064, 2.18677868914705, 0.0287586839215016, 0.305734560448239  
"1451", "KCNE3", 16.5030821545136, 1.00852983912452, 0.461278797901741, 2.1

8637805100105,0.0287879580701905,0.305834854343203  
"1452","ZNF215",13.6741406738046,-1.33000931737708,0.608392089081042,-  
2.18610554155302,0.0288078846667189,0.305835772821951  
"1453","NDRG1",1017.82658518383,0.409860938899242,0.187625314305815,2.  
1844650356252,0.0289280938164717,0.306900596132768  
"1454","ITM2C",318.761309008747,0.662014983554152,0.303352047070016,2.  
18233234272968,0.0290850136677738,0.307718246869412  
"1455","GALNT8",32.3743472843316,0.900771374839723,0.412690892732494,2.  
18267810291516,0.0290595235823034,0.307718246869412  
"1456","WASHC4",245.110331198308,0.337792557087712,0.154746172976048,2.  
18288149290772,0.0290445382764324,0.307718246869412  
"1457","CDIP1",77.3876122498844,0.553134014540373,0.253439529030949,2.  
18250884798964,0.029071998967588,0.307718246869412  
"1458","SYK",4.36728685520971,-1.87753794179819,0.860588120777052,-2.1  
8169167859638,0.0291322954870406,0.308007088431229  
"1459","DENND4C",175.52504834257,0.427962173465341,0.196215670045194,2.  
18108050884401,0.0291774622195133,0.308140289626061  
"1460","GLIS2",138.876020822456,-0.550372700171129,0.252351064021517,-  
2.18098030339274,0.0291848733606259,0.308140289626061  
"1461","TMEM123",474.242944162812,0.357221433775447,0.16383614744482,2.  
18035787185339,0.029230944352962,0.308415473785701  
"1462","SNAPC2",164.569980141409,-0.50933825610556,0.233655213386007,-  
2.17987113886526,0.0292670148310722,0.308584838318042  
"1463","SRPRB",162.796098520845,-0.463208275175136,0.212521187026141,-  
2.17958633516459,0.0292881386264891,0.30859648457097  
"1464","LINC02550",10.8821714180008,1.47663491446804,0.677902838873029  
2.1782397561911,0.0293881916681187,0.309338198272495  
"1465","APOL1",261.044018876941,0.59898316822197,0.275002729513288,2.1  
7809899298846,0.0293986675620632,0.309338198272495  
"1466","FZD7",163.327271247032,0.493569905871513,0.226659903205323,2.1  
7757926696194,0.0294373744997401,0.309443570749319  
"1467","CELF1",303.890011763779,0.53203284977574,0.244365589734859,2.1  
772003593182,0.0294656215196432,0.309443570749319  
"1468","RILPL2",143.436695344265,-0.49077070796505,0.225418220283669,-  
2.17715634231988,0.0294689044346416,0.309443570749319  
"1469","ZNF317",36.1845585218135,0.610981151358806,0.280697189248807,2.  
17665575132367,0.0295062620996222,0.309624935511012  
"1470","ZMYM2",184.738123099755,0.453466091019071,0.208406330057436,2.  
17587484456013,0.0295646202587997,0.310026272985984  
"1471","ZNRF1",184.650567597965,-0.520469406966835,0.239276242084278,-  
2.17518213439476,0.0296164704331702,0.310358865892127  
"1472","PNISR",1492.78724874459,0.363701380711023,0.167299591289639,2.  
17395259550491,0.0297086954809581,0.310902607494209  
"1473","ADAM9",439.282758381553,0.447225765959398,0.205696368576775,2.  
17420350710991,0.0296898551153235,0.310902607494209  
"1474","PTPRS",82.9332626744934,0.58897496177831,0.271089672414403,2.1  
7262043416383,0.0298088966399721,0.311739580532679  
"1475","PHC3",180.322658896222,0.453322610119792,0.208702474949855,2.1  
7209982885307,0.0298481338924013,0.311938294204316  
"1476","SLF2",105.136061625213,0.471730791439551,0.217261164167694,2.1

7126145506356,0.0299114142137358,0.312387838824348  
"1477","ZBTB20",1870.67447570166,0.474117586342669,0.218398076768915,2  
.17088718617394,0.0299397011847798,0.312471559758552  
"1478","PLPPR4",3.10057268369902,2.43488327110948,1.121939732246,2.170  
24426636101,0.0299883462774754,0.312767495174075  
"1479","TBRG1",197.962534890442,-0.344312163186747,0.158732217232317,-  
2.16913849746594,0.0300721707244107,0.313429690139818  
"1480","MERTK",5.4718149319369,-1.90204198305391,0.877055639222032,-2.  
16866741172894,0.0301079432006537,0.313590502998701  
"1481","IDH3A",77.7841852249064,-0.461084340681487,0.21269664553559,-2  
.16780259754654,0.0301737091298493,0.313972685620916  
"1482","KCTD2",60.2028503282659,0.550146685989028,0.253816351757265,2.  
16749898964412,0.0301968266494494,0.313972685620916  
"1483","NAPA-  
AS1",23.3119445857517,0.834947849370967,0.385233364432942,2.1673819727  
4267,0.0302057406925604,0.313972685620916  
"1484","DDIT4",947.423640503744,1.48793474223182,0.686639055354069,2.1  
6698239144663,0.0302361968017957,0.314077475538868  
"1485","WDFY3-  
AS2",180.544804626548,0.546684273588392,0.252356581459776,2.1663166873  
8756,0.0302869954029707,0.314181718799996  
"1486","MARCH8",70.1530147030452,0.46159668181685,0.213078582856494,2.  
16632134318131,0.0302866398738006,0.314181718799996  
"1487","EIF4G2",1095.62407887115,0.347654866509228,0.160505312449406,2  
.16600224132029,0.0303110156673752,0.31421943948392  
"1488","MRPS6",447.753565673006,-0.651341274025315,0.30091682837575,-2  
.16452259430302,0.0304242644654514,0.315181476300359  
"1489","TTN",8.9141742270433,1.80308607433564,0.833166177815279,2.1641  
3738620989,0.0304538069743778,0.31519854914434  
"1490","CALCOC01",337.19153934225,0.497601364192039,0.229948580853468,  
2.1639679720795,0.0304668075397383,0.31519854914434  
"1491","SSH2",140.77276690998,0.578047528048821,0.267209740569475,2.16  
32726666958,0.0305202140913786,0.31553930262817  
"1492","ZNF524",164.861135986749,-0.650189798589711,0.300643414063653,  
-2.1626610402051,0.0305672597075105,0.315813879618817  
"1493","CABLES1",78.5308225646062,0.606057322697258,0.280319754781144,  
2.16202145000601,0.0306165228673703,0.316110984595119  
"1494","TRMT6",73.6817860086653,-0.54618395708218,0.252680356897346,-2  
.16156081061763,0.030652044921028,0.316265911952909  
"1495","TRERF1",132.35663980666,0.564051458297883,0.2611528458353,2.15  
985185416517,0.0307841399219742,0.316470816178773  
"1496","PPIL6",25.2994518147067,-0.743314260187019,0.344273850046609,-  
2.1590784780383,0.0308440790400166,0.316470816178773  
"1497","MLXIPL",115.073793539463,0.919924079463699,0.42576946962521,2.  
16061541536427,0.0307250596337918,0.316470816178773  
"1498","CALHM3",3.33494667802319,-1.87438025753172,0.868021830288977,-  
2.15936995145354,0.0308214771652456,0.316470816178773  
"1499","DDB1",303.62417635152,0.300842573293823,0.13926954691593,2.160  
14613356519,0.0307613586113559,0.316470816178773  
"1500","FXVD6",12.1444510707125,-1.17295015644606,0.543020944944973,-2

.16004588288011,0.0307691177797786,0.316470816178773  
"1501","HELZ",226.057520360014,0.436043339668204,0.201998013432762,2.1  
5865162363762,0.0308772045107282,0.316470816178773  
"1502","ARHGAP28",107.261015126475,0.625601974478795,0.289789361361104  
,2.15881622272267,0.0308644274005137,0.316470816178773  
"1503","TMEM221",43.3416593860569,1.14505779036415,0.530010718095414,2  
.16044270666619,0.0307384143832914,0.316470816178773  
"1504","IFNAR2",75.8454746504685,-0.555613344215884,0.257293755676455,  
-2.15945133512904,0.030815168928551,0.316470816178773  
"1505","PLEKHG4",68.2236835598805,-0.508788290494943,0.235880308170782  
, -2.15697653797608,0.0310074925720403,0.317595015281064  
"1506","CMPK1",620.040541790537,-0.468230128240769,0.217269591096532,-  
2.15506516985497,0.0311567348183445,0.31868809174738  
"1507","RBSN",117.07808141662,0.417781643910461,0.193906187559875,2.15  
455550525667,0.031196634077267,0.31868809174738  
"1508","ANKRA2",69.6156422236344,0.51671874493808,0.239899659765201,2.  
15389528040104,0.0312483851757827,0.31868809174738  
"1509","IQGAP2",13.4673900553054,-1.30797493220681,0.607126353333718,-  
2.15437021474154,0.0312111504692195,0.31868809174738  
"1510","TMEM70",204.540433638568,-0.536864516243142,0.2492360592053,-2  
.15404030201311,0.0312370114856181,0.31868809174738  
"1511","AC067930.8",4.7706592502245,1.80011142721509,0.835901345175897  
,2.1534974642687,0.031279603166642,0.31868809174738  
"1512","PYCARD-  
AS1",6.80551494339031,2.08420888730252,0.967253792724823,2.15476941313  
526,0.0311798828932018,0.31868809174738  
"1513","HSDL1",69.0373771778067,0.561653271093972,0.260791989925539,2.  
15364463937077,0.0312680507163444,0.31868809174738  
"1514","SNTA1",142.411262200871,-0.542361990078889,0.251976389961067,-  
2.15243178205185,0.0313633627789001,0.319330407686093  
"1515","N4BP2L2",764.278506447322,0.299867518027046,0.139359713271615,  
2.15175182976014,0.0314169056029501,0.31957202016981  
"1516","HEXD-  
IT1",4.30696263717893,2.06144803753746,0.958098247202832,2.15160401718  
285,0.0314285554704789,0.31957202016981  
"1517","SNHG15",100.850580419626,-0.612593567690819,0.285131728476947,  
-2.14845808624328,0.0316773826285424,0.32167776891896  
"1518","IL16",74.2652769732684,-0.808347782926555,0.376227837704423,-2  
.14855920247353,0.0316693586481966,0.32167776891896  
"1519","CSF1R",7.12665513133518,-1.61319490876932,0.751089762250201,-2  
.14780574819224,0.0317291901973882,0.321927100359354  
"1520","SURF1",272.769716265152,-0.425642455327064,0.198192337647564,-  
2.14762316434233,0.0317437037006953,0.321927100359354  
"1521","NECTIN3",215.727622348445,-0.345297251224298,0.160889499356443  
, -2.14617642919821,0.031858905373079,0.322008819401973  
"1522","ANK2",1062.28184033758,-0.61461793695581,0.286241786070946,-2.  
14719851141326,0.0317774811776798,0.322008819401973  
"1523","RANBP17",7.06207229031561,-1.39260745401743,0.64874162685372,-  
2.14662879083515,0.0318228459385,0.322008819401973  
"1524","FGFR2",15.6163745272126,-1.48837359560299,0.693380214496025,-2

.14654754272848,0.0318293199490687,0.322008819401973  
"1525","QPRT",36.657581165033,1.31952119875114,0.61476557305635,2.1463  
8108668163,0.0318425870242547,0.322008819401973  
"1526","LINC01915",69.2359695259361,-0.740679013228922,0.3451522977468  
55,-2.14594837717742,0.0318770975288622,0.322008819401973  
"1527","COCH",47.9006688865373,-1.00612015349442,0.4689104424541,-2.14  
565525184035,0.0319004937901552,0.322034126899307  
"1528","TRMT61A",61.7331853185081,-0.491664851736678,0.229220556587415  
,-2.14494222968688,0.0319574662431845,0.322187274126023  
"1529","ICE2",140.616005346802,0.370899401011742,0.172900448911951,2.1  
4516158486448,0.0319399298725926,0.322187274126023  
"1530","EVI2B",16.4481988052591,-0.90218153225315,0.420690249679931,-2  
.14452684116056,0.031990697132677,0.322311500849815  
"1531","C11orf80",13.7861221109448,-1.07128626625294,0.49963076033646,  
-2.14415594734703,0.0320203934922556,0.322399977585317  
"1532","GDPD5",97.6979161087935,0.67512374699184,0.314953572089049,2.1  
4356593104763,0.0320676830260809,0.322454881831074  
"1533","OGT",270.473161312337,0.509973625406741,0.237899659059081,2.14  
365008938534,0.0320609341161848,0.322454881831074  
"1534","SNED1",401.715812942655,0.828978796548278,0.386928689132948,2.  
14245885567674,0.0321565761495183,0.32271720139637  
"1535","AC005332.7",7.48116235033808,1.33316388427133,0.62220162673078  
3,2.14265573569155,0.0321407521577957,0.32271720139637  
"1536","CST2",3.08788087655359,2.8895991432025,1.3485907950844,2.14268  
045854611,0.0321387655601257,0.32271720139637  
"1537","EYA4",5.33918710796237,1.72853442613979,0.80695269387015,2.142  
05174512737,0.0321893183426082,0.322835616298832  
"1538","CHIC1",42.5496436708931,0.583244181086422,0.272341852617578,2.  
14158850533125,0.0322266095209544,0.32299947058876  
"1539","KCNA2",6.90355581314687,1.44282782365846,0.673998669169635,2.1  
4069832724747,0.0322983735051974,0.323508399988705  
"1540","KLF6",4686.00274702641,-0.587804102357845,0.274636057175754,-2  
.14030199968127,0.0323303684927841,0.323618591114459  
"1541","GOLGA8N",19.2374483932006,1.00268788497364,0.468562690352724,2  
.13992258798677,0.0323610233227474,0.323715233303148  
"1542","OLFML2A",290.904962681724,0.539990022408175,0.252373815759486,  
2.13964361074126,0.0323835793660107,0.323730788538946  
"1543","AL359258.2",10.1600756240336,-1.14604066617202,0.5360145948051  
92,-2.13807735326411,0.0325104656409198,0.324788611701088  
"1544","FAM89B",453.477245769145,-0.534191366882476,0.249877080743665,  
-2.13781658282808,0.0325316325803421,0.32478958304791  
"1545","FPR1",5.36382949266542,1.64401286221409,0.770061826769577,2.13  
491021767792,0.0327683445544374,0.32694112058683  
"1546","BBS2",113.194821368341,0.541315368841326,0.253639969308538,2.1  
3418796066344,0.0328273978215431,0.327318458873924  
"1547","SNTB1",24.5857233400203,0.906397764812982,0.424866068052805,2.  
13337292141751,0.0328941465686396,0.327771990533664  
"1548","YARS",92.0707920510074,-0.480766976092672,0.225570730136803,-2  
.13133581560471,0.0330614864638204,0.327785407270627  
"1549","CTPS1",19.5414096373357,-0.778871129398741,0.365317793327975,-

2.13203721150118,0.0330037875983258,0.327785407270627  
"1550","DDR2",1626.02409281727,0.539923694997992,0.253151621750397,2.1  
3280756909528,0.0329405150901556,0.327785407270627  
"1551","CEP170",281.886822812931,0.35305324323198,0.165652699327276,2.  
13128578444992,0.0330656054690772,0.327785407270627  
"1552","PLEC",404.775426661831,-0.589975661012856,0.276761717436135,-2  
.13170978442493,0.0330307119655108,0.327785407270627  
"1553","AL158071.1",33.9934463084358,1.04341565549163,0.48934168624008  
6,2.132284423812,0.0329834717496257,0.327785407270627  
"1554","VWF",2.90214004316836,-2.20252725100128,1.03302156527586,-2.13  
212126933006,0.032996878544462,0.327785407270627  
"1555","SLC23A2",68.523158478716,0.51010936460698,0.23931769228713,2.1  
3151547523264,0.0330466989211337,0.327785407270627  
"1556","RRAS2",212.394715237945,0.623825991034574,0.292781026227353,2.  
13069131928705,0.0331145807015596,0.328059936706003  
"1557","CNIH3",35.2684217157518,-0.649524910439443,0.304980895012145,-  
2.12972327467783,0.0331944662840084,0.328429202675218  
"1558","HNRNPAB",444.711671942042,-0.376180442310277,0.176619221842699  
, -2.12989525367353,0.0331802620903064,0.328429202675218  
"1559","AC079848.1",5.87114480522746,-1.2878527127448,0.60498542071285  
5,-2.12873346803518,0.0332763181970855,0.328841038681818  
"1560","HMG2",3.25562745888331,-1.93776893554729,0.91030453950639,-2.  
12870402315915,0.0332787557796715,0.328841038681818  
"1561","ARNTL2",10.5938262735189,-1.17029344684771,0.550370847007116,-  
2.12637252356606,0.0334722537136857,0.330541185776083  
"1562","TRIM69",144.453893978288,0.581908611999241,0.273876768753106,2  
.12470964459136,0.033610848199889,0.331519742181875  
"1563","TPGS1",371.586971190263,-0.66516689325083,0.313068687616538,-2  
.12466758753453,0.0336143598462712,0.331519742181875  
"1564","CYB5R3",1280.90789140626,-0.410602289299635,0.193293506678586,  
-2.12424253848525,0.0336498678663533,0.331657744987108  
"1565","PPP1CC",711.956749519199,-0.328997384806628,0.154930797677826,  
-2.12351185005042,0.0337109835614305,0.332047802938946  
"1566","CNST",110.350645342553,-0.530488993561775,0.250042883364902,-2  
.12159205022285,0.0338720105526476,0.33342084461626  
"1567","CCND3",73.3493704690658,-0.58141181619632,0.274152795900359,-2  
.12075829570468,0.0339421479198597,0.333755724146522  
"1568","AC027031.2",13.0378143433987,-1.03689078564368,0.4889850475416  
25,-2.12049589421322,0.0339642474149223,0.333755724146522  
"1569","SPG11",143.449480290474,0.4193286269745,0.197757723811714,2.12  
041592556833,0.0339709848320397,0.333755724146522  
"1570","HLA-  
DOA",3.89056759995931,-1.71185354775574,0.807585649630215,-2.119717640  
52466,0.0340298644230051,0.334121248458996  
"1571","CNBD2",24.4756236801943,-0.802154084300279,0.378675787432316,-  
2.11831363642085,0.0341485145203717,0.335072788880668  
"1572","EDEM3",178.262933267665,0.509688711325385,0.240832098188532,2.  
11636536474628,0.0343137454147669,0.33647988903857  
"1573","SPTSSA",182.64084265093,-0.424240162324829,0.200502285767849,-  
2.11588691221223,0.0343544268060856,0.336664646672479



"1574", "SET", 902.13614253852, -0.405522544985236, 0.191696615133787, -2.1  
1543925646375, 0.0343925269497034, 0.336823890044268  
"1575", "RNF126", 106.584110843906, -0.457134882843009, 0.21617998557122, -  
2.11460317029398, 0.0344637832374022, 0.337307440383845  
"1576", "IMP4", 184.495613292753, -0.436938891338639, 0.206698023636164, -2  
.11389970572603, 0.034523834384892, 0.337466649995631  
"1577", "SRGAP1", 447.67391522949, 0.514738922212207, 0.243493894886972, 2.  
11397054719234, 0.0345177829688554, 0.337466649995631  
"1578", "TBCEL", 43.2883389571284, 0.613097075715505, 0.290229080159992, 2.  
11245914908847, 0.0346470862779789, 0.338028376566484  
"1579", "ZNF676", 21.6567723321122, 1.01597850168778, 0.480877427695006, 2.  
11275980774909, 0.0346213313790252, 0.338028376566484  
"1580", "SPECC1L", 197.135649251629, 0.441336638762523, 0.208898089832459,  
2.11268872356126, 0.0346274190870206, 0.338028376566484  
"1581", "PLXDC1", 295.024561162615, 0.56843223806878, 0.269118513443796, 2.  
1122004235041, 0.0346692622214557, 0.33803078883222  
"1582", "AL162595.1", 6.00411597300049, 1.44578640856748, 0.68477642327303  
5, 2.11132620725613, 0.034744282943987, 0.338139907410111  
"1583", "ITSN2", 153.871809675561, 0.517511082374456, 0.245114528114962, 2.  
11130317878072, 0.0347462610014671, 0.338139907410111  
"1584", "MTX3", 78.5459494232948, 0.585262832878356, 0.277193844545224, 2.1  
1138466598551, 0.0347392619958765, 0.338139907410111  
"1585", "NINJ1", 72.7008191635632, -0.58191672779388, 0.275699415299033, -2  
.1106926438807, 0.0347987386883979, 0.338229125136803  
"1586", "EMP2", 732.843463090254, -0.575439993271415, 0.272631740958777, -2  
.11068597973126, 0.034799311869411, 0.338229125136803  
"1587", "AC022034.1", 26.0067140215571, 0.771610135811347, 0.3657087369068  
43, 2.1099034776626, 0.0348666706576562, 0.338670276110757  
"1588", "USP20", 30.794076040825, 0.674349224030021, 0.319708068488836, 2.1  
0926557849311, 0.0349216641850526, 0.338990839680469  
"1589", "ODF3B", 126.251746835643, -0.838823170558603, 0.397747430918776, -  
2.10893422647876, 0.0349502593819064, 0.339054907723151  
"1590", "LPL", 12.4714876364037, -1.00263474534188, 0.475504162825706, -2.1  
0857196156533, 0.0349815451909543, 0.339144980577711  
"1591", "USP33", 387.285491998181, 0.426074399234194, 0.202326293446438, 2.  
10587755044793, 0.0352149902023264, 0.339408599325102  
"1592", "NPR1", 310.243086997067, -0.467714035272636, 0.222080568934393, -2  
.1060556424043, 0.0351995192994651, 0.339408599325102  
"1593", "KCNE4", 107.14938596141, -1.05851018269453, 0.502425273313994, -2.  
10680122779773, 0.0351348130347668, 0.339408599325102  
"1594", "RASSF1", 170.733856237152, -0.521640492201185, 0.247619596107857,  
-2.10662039838709, 0.0351504971358787, 0.339408599325102  
"1595", "GIMAP6", 2.72426343110865, -1.99488123782065, 0.94695027732517, -2  
.1066377882644, 0.0351489885784455, 0.339408599325102  
"1596", "PHF19", 107.821775990993, -0.421022155789413, 0.199942394074052, -  
2.10571728791784, 0.0352289172183045, 0.339408599325102  
"1597", "CREB3L1", 220.544348686135, 0.936114320026115, 0.444082768219741,  
2.10797262811807, 0.0350333571390434, 0.339408599325102  
"1598", "PC0TH", 4.86427438912002, -1.38095561552199, 0.65565383411036, -2.  
10622670634691, 0.0351846643850383, 0.339408599325102

"1599", "RBM26", 248.186058537944, 0.444104632774363, 0.210842591458205, 2.10633264229442, 0.0351754677628941, 0.339408599325102  
"1600", "DACT1", 35.8081903711863, -0.847712617181696, 0.402415543233509, -2.10656032411202, 0.0351557089546504, 0.339408599325102  
"1601", "SENP3", 26.8612917265007, -0.79234019427453, 0.376447504903232, -2.10478269600487, 0.0353102281106883, 0.339979491771556  
"1602", "TRIM7", 24.4451998957565, -0.89782488837965, 0.426671302426195, -2.10425421928852, 0.0353562772220933, 0.340049168934123  
"1603", "TPST2", 37.9035488038851, 0.651286396726531, 0.309518322277832, 2.104193354156, 0.0353615840286344, 0.340049168934123  
"1604", "FAM184B", 4.5018869841868, 2.61040998556421, 1.24116193520472, 2.10319855251897, 0.0354484167751115, 0.340671661214678  
"1605", "BASP1", 2404.11588923246, -0.502744531989928, 0.239123112784123, -2.10245060018016, 0.0355138226696813, 0.341087586575163  
"1606", "ZNF697", 17.5295697066475, 0.929814614865195, 0.442630065204162, 2.10065851364236, 0.0356709535687905, 0.341585600884115  
"1607", "TMEM173", 325.370664837684, -0.478458810001777, 0.227785828798015, -2.10047662985234, 0.0356869343137428, 0.341585600884115  
"1608", "MYLIP", 331.001792812102, 0.677573592929595, 0.322622444522182, 2.10020599754959, 0.0357107240187394, 0.341585600884115  
"1609", "VEGFB", 1259.55017267425, -0.486454009150218, 0.23154834178237, -2.10087451028879, 0.0356519835159984, 0.341585600884115  
"1610", "MRPL49", 75.5870103782816, -0.461813966892249, 0.21990182874747, -2.10009152503495, 0.035720790699007, 0.341585600884115  
"1611", "ZNF546", 32.4136892001082, 0.645638296124066, 0.307247355888419, 2.10136322982235, 0.0356090931512735, 0.341585600884115  
"1612", "HM13", 592.040934978511, -0.42068725237833, 0.200267215458004, -2.10062965831044, 0.0356734884598222, 0.341585600884115  
"1613", "POLR2J", 471.933922886257, -0.477714133367703, 0.227589752317286, -2.09901425043828, 0.0358156445462613, 0.342280322802615  
"1614", "IQSEC1", 208.546106491144, 0.677934799977153, 0.323127469629529, 2.09804137281927, 0.0359014907692426, 0.342888153784309  
"1615", "PTP4A2", 987.851849844729, -0.298779931250289, 0.142438142648095, -2.09761181728162, 0.0359394503338081, 0.343038159068515  
"1616", "DVL1", 108.096259439365, -0.423954205624096, 0.202288004872885, -2.09579508132726, 0.0361003728809401, 0.343298734089878  
"1617", "BCL9", 42.2486216100957, 0.640938704941831, 0.305752582355148, 2.09626587616959, 0.0360586120343969, 0.343298734089878  
"1618", "ILF2", 383.363219608886, -0.533181071547095, 0.254355773978545, -2.09620195841148, 0.0360642793046072, 0.343298734089878  
"1619", "LM07DN", 11.8799619270386, 1.85922603916642, 0.887069716659573, 2.09591873586631, 0.0360894003796402, 0.343298734089878  
"1620", "RNASE6", 7.54030536369906, -1.69368696378359, 0.807883369423816, -2.09644984398123, 0.036042304759533, 0.343298734089878  
"1621", "STAT5B", 131.995122344223, 0.448817275406351, 0.214098137101123, 2.09631564983849, 0.0360541993762008, 0.343298734089878  
"1622", "NDRG2", 162.523721358457, -0.459285016041688, 0.219253709143806, -2.09476509125074, 0.0361918797392743, 0.343956736239774  
"1623", "SH3RF3-  
AS1", 4.20072483196645, 1.80330551778371, 0.861161480948057, 2.09403875774

662,0.0362565278119125,0.344146783387088  
"1624","COBLL1",196.1973051732,-0.485790360290422,0.231966510411849,-2  
.09422627183518,0.0362398285062896,0.344146783387088  
"1625","EFEMP1",6112.96733136435,0.607675723234432,0.290242544193524,2  
.093682457625,0.0362882766445394,0.344236175061892  
"1626","CCL26",130.998009700818,-1.82263689809249,0.870844064566373,-2  
.09295437869242,0.0363532272580103,0.344640220284273  
"1627","ZNF562",45.5844352448079,0.702728925367119,0.335932618958545,2  
.09187463707964,0.036449731466542,0.345342723144895  
"1628","FAM131C",3.7088865230727,-2.40188662889282,1.14864999443243,-2  
.09105179169886,0.0365234215225119,0.345828343224521  
"1629","XP01",261.533075745331,0.338800295448241,0.162182880051877,2.0  
8900159708515,0.0367075794050134,0.347331511837553  
"1630","IL17RE",20.1152534306964,-0.834678397601078,0.399671686358752,  
-2.08841012783641,0.0367608546778837,0.347331511837553  
"1631","PLSCR4",710.770104401072,0.46076797622384,0.220660817568071,2.  
08812774874134,0.0367863125638496,0.347331511837553  
"1632","MDGA1",43.2268627093937,0.599294550418052,0.286944070590788,2.  
08854132857378,0.0367490313831817,0.347331511837553  
"1633","ACIN1",249.819683003165,0.413154334571137,0.197867696960088,2.  
088033271315,0.0367948335277797,0.347331511837553  
"1634","KCTD10",149.581822947537,0.431732902022408,0.206801452597984,2  
.08766861450284,0.0368277378675398,0.347429363052708  
"1635","ZNF135",21.7615241224118,0.89872851247862,0.430647566548582,2.  
08692346663297,0.0368950532668421,0.347851526671787  
"1636","TRIB2",10.6603152381428,-1.0778185455512,0.516527198106748,-2.  
08666368296147,0.0369185463066023,0.347860263640754  
"1637","GPRC5B",290.490083085636,0.539671825088117,0.258675077070747,2  
.08629231389199,0.0369521524810111,0.347964221438477  
"1638","EIF3G",1277.7836292564,-0.490514579394489,0.235168616373266,-2  
.08579948701969,0.0369967899167105,0.348171866035466  
"1639","USP46",101.189296021315,0.419132873756692,0.200998807041315,2.  
08525055410175,0.0370465631635803,0.348215104369872  
"1640","PCDHGA6",21.5978906988875,0.888961467580118,0.426286207896645,  
2.08536295829597,0.0370363665285455,0.348215104369872  
"1641","CD8B",5.36224212339518,-1.44382321309155,0.692543431972623,-2.  
08481251346071,0.0370863223977192,0.348376392297892  
"1642","MBTPS1",381.36799186639,0.31375637673346,0.15056207711035,2.08  
390042668913,0.0371692255383456,0.348942516244578  
"1643","IRF4",113.890378759749,0.9766109642864,0.46879047746227,2.0832  
5683058483,0.0372278194102603,0.349279875964189  
"1644","EPB41L4A-  
AS1",585.291641782332,-0.528847449893448,0.253910386942922,-2.08281140  
547563,0.0372684175495095,0.349448087911003  
"1645","PHF21A",141.353883325993,0.480227806487909,0.230730941626538,2  
.08133249534086,0.037403482779655,0.349879812037772  
"1646","STRAP",394.243204397386,-0.473184998272653,0.227279593524375,-  
2.08195109351911,0.0373469371263126,0.349879812037772  
"1647","TM6SF1",4.27742850260471,-1.7206018860901,0.826690527653562,-2  
.08131317407709,0.0374052500965455,0.349879812037772

"1648", "REEP6", 8.53753157036763, 1.49138896578071, 0.716518652721853, 2.08143774082551, 0.0373938572181717, 0.349879812037772  
"1649", "PARVA", 577.891183476419, 0.351215814760885, 0.168813328950049, 2.08049812740088, 0.037479867215607, 0.350152820077928  
"1650", "FXYD7", 6.04035876977208, -1.33889078223537, 0.64347009390506, -2.08073505655868, 0.0374581634204352, 0.350152820077928  
"1651", "GFRA1", 352.185304802318, 0.645998763725417, 0.310543242204435, 2.08022161145644, 0.0375052108743195, 0.350177362584879  
"1652", "DBT", 108.115261017481, 0.54609126724622, 0.262644889130496, 2.0792005241333, 0.0375989668527461, 0.350627993971616  
"1653", "TLR3", 116.471256327417, 0.407920083028163, 0.196190728568951, 2.07920163202208, 0.0375988217266422, 0.350627993971616  
"1654", "USP10", 105.952570540068, 0.437912543789797, 0.21067728899355, 2.07859397603699, 0.0376546851345401, 0.350821879948847  
"1655", "TMEM35A", 49.2375701775618, 0.653790934907093, 0.314552600666929, 2.07847887291631, 0.0376652748177322, 0.350821879948847  
"1656", "LBX2", 15.1224878652798, 1.03379095370943, 0.497652054433465, 2.0773368551373, 0.0377704797559419, 0.351165226440195  
"1657", "CCDC36", 32.803705053196, -0.73970299293136, 0.356079106113387, -2.07735579041758, 0.0377687333644776, 0.351165226440195  
"1658", "CDKL5", 70.4202617240673, 0.5372606222614, 0.258614665915572, 2.07745612708908, 0.0377594805096284, 0.351165226440195  
"1659", "CCL28", 17.6952920717975, -0.910772110791201, 0.438728741788273, -2.07593445343668, 0.0379000136587633, 0.351310108568753  
"1660", "SNX13", 154.317717324945, 0.370480088094901, 0.178444114126774, 2.07616872043029, 0.0378783491577637, 0.351310108568753  
"1661", "RMRP", 7.92019772798005, 1.33582406332224, 0.643413232080286, 2.07615261346622, 0.0378798383574004, 0.351310108568753  
"1662", "DDX21", 550.718171718474, -0.392428038195562, 0.189006283306917, -2.07626980082096, 0.0378690047170807, 0.351310108568753  
"1663", "KCNMB4", 47.2174950927157, 0.647583383647264, 0.311836389983271, 2.07667675886706, 0.0378314030597051, 0.351310108568753  
"1664", "GZMH", 13.7224210639829, 1.03911121339252, 0.500724482806824, 2.07521551086888, 0.037966565714999, 0.351715511115811  
"1665", "HCST", 31.1779004096032, -0.945886822765303, 0.456029574085611, -2.07417868602472, 0.0380627189443319, 0.352394481998124  
"1666", "AC087071.1", 4.72143443643784, 1.68535932335932, 0.81264885821579, 2.07390843698421, 0.0380878153394741, 0.352415170142853  
"1667", "LINC01985", 18.9248606956573, -0.821165542706931, 0.396116141687296, -2.07304236381051, 0.038168337145788, 0.352674639243947  
"1668", "TFEB", 56.4925309034388, -0.56319920841983, 0.27166196218858, -2.07316182170867, 0.0381572221352172, 0.352674639243947  
"1669", "LRRRC8A", 139.646678405023, 0.476905656477846, 0.230070355943651, 2.07286877321409, 0.0381844938630002, 0.352674639243947  
"1670", "MFSD13A", 4.52208249720904, -1.54559661740293, 0.745887659175216, -2.07215737972125, 0.0382507666395841, 0.353075190268975  
"1671", "AC010864.1", 2.87906218163939, -1.86048756464393, 0.898129467674796, -2.07151377569275, 0.0383108084432921, 0.353349703518755  
"1672", "ZSWIM8", 119.88386428133, 0.468946592741486, 0.226396891966829, 2.07134730811673, 0.0383263512347298, 0.353349703518755

"1673", "STK38", 236.082021467737, 0.420283161281531, 0.202970692601717, 2.07065934443175, 0.038390642088405, 0.353730871364473  
"1674", "SGCD", 231.956145236042, 0.595344310178442, 0.287560529832575, 2.07032693438514, 0.0384217389539979, 0.353805917548314  
"1675", "MAN2B2", 219.386444577648, 0.408175431593508, 0.197217660439482, 2.06966977847686, 0.0384832787098327, 0.354161039589296  
"1676", "GREM2", 7.74853483650988, 1.47700140330847, 0.713818168870545, 2.06915635902836, 0.0385314164557775, 0.354392472950961  
"1677", "NAP1L5", 46.6041532594249, 0.549220788428675, 0.265506120384193, 2.06858051947707, 0.0385854675316118, 0.354677985688608  
"1678", "DNAJC13", 157.829827870532, 0.357202936831658, 0.172758762783759, 2.06764004948778, 0.038673883132318, 0.355043969681313  
"1679", "DYNLT1", 620.752115300771, -0.515442860329949, 0.249270777441773, -2.06780299568147, 0.0386585518927316, 0.355043969681313  
"1680", "NUDT2", 175.478432274918, -0.535882869051603, 0.259203391935427, -2.06742228583607, 0.0386943800885245, 0.355043969681313  
"1681", "TKT", 391.674455856655, -0.390868566951374, 0.18924225108716, -2.06544027407151, 0.03888136122098, 0.356396693915375  
"1682", "PARD6A", 22.7062786716271, -0.960900833221734, 0.465244018649736, -2.06536955813108, 0.038888046653627, 0.356396693915375  
"1683", "GJA1", 643.638297371755, 0.568197362156189, 0.275175051622532, 2.06485783796856, 0.0389364534056253, 0.35641652568154  
"1684", "LAMA2", 1033.3338760006, 0.569601409866334, 0.275828376802175, 2.06505732466698, 0.0389175766499645, 0.35641652568154  
"1685", "LNP1", 9.25550985769551, 1.03335476779529, 0.500877726423621, 2.06308788209384, 0.0391042792808866, 0.357607970254918  
"1686", "SMAD5", 397.287377265996, 0.329099668203842, 0.159525112972791, 2.06299598897619, 0.0391130092669343, 0.357607970254918  
"1687", "LIMD1", 44.3865194591929, 0.629503750296259, 0.305239914266197, 2.06232448927788, 0.0391768530138778, 0.357641768397511  
"1688", "FAM184A", 61.251106094694, -0.809502425686257, 0.392538340958336, -2.06222511592104, 0.0391863085840673, 0.357641768397511  
"1689", "SMIM25", 4.01220633189933, -1.70027109882655, 0.824464054688299, -2.06227438195515, 0.0391816205819006, 0.357641768397511  
"1690", "ADAMTS3", 20.6278777575587, -1.10730575937655, 0.537037071669095, -2.06187955690857, 0.0392192042915034, 0.357730197723979  
"1691", "ZNF593", 163.484735690477, -0.500222707884123, 0.242885046078736, -2.05950393389787, 0.0394459885535986, 0.357863350298482  
"1692", "AL359541.1", 13.9524229781541, 0.879966457589974, 0.427288073200539, 2.05942199836919, 0.0394538301896789, 0.357863350298482  
"1693", "SLC30A6", 65.2728904013075, 0.462835531717445, 0.224777975364916, 2.05907865735535, 0.0394867040186619, 0.357863350298482  
"1694", "PCBP1", 1178.6555093175, -0.240843102866374, 0.116915531716698, -2.05997526017304, 0.0394009059854447, 0.357863350298482  
"1695", "PPP1R11", 121.770895957481, -0.423022453799964, 0.205455000404718, -2.05895428666457, 0.0394986178590409, 0.357863350298482  
"1696", "ADGRA2", 185.030303685253, 0.384512046513415, 0.186776788841806, 2.05867147035643, 0.0395257210379201, 0.357863350298482  
"1697", "EIF4EBP2", 516.018610114844, 0.362028057102266, 0.175713382518887, 2.06033286658375, 0.0393667299646296, 0.357863350298482

"1698", "NEK9", 98.5141560819944, 0.52133191551018, 0.253189029072933, 2.05  
906202736772, 0.0394882968782107, 0.357863350298482  
"1699", "SLC30A4", 70.8806240325296, 0.466217044420622, 0.226251864488127,  
2.06061083949691, 0.0393401818109639, 0.357863350298482  
"1700", "MFAP4", 4909.57103990524, -0.423495798786745, 0.205671111702094, -  
2.05909228224604, 0.0394853990350551, 0.357863350298482  
"1701", "LDLR", 103.146910623946, -0.997258753221014, 0.484442850808189, -2  
.058568418457, 0.0395356007498096, 0.357863350298482  
"1702", "TSPAN6", 125.471656256765, 0.514193133362402, 0.249598259298948, 2  
.06008301022061, 0.039390605790719, 0.357863350298482  
"1703", "STK26", 13.7496516754441, -1.10411500464989, 0.535973332549189, -2  
.06001854494982, 0.0393967679711826, 0.357863350298482  
"1704", "ZNF445", 67.2602592095001, 0.617995949231244, 0.300321871164182, 2  
.05777869868623, 0.039611381756875, 0.358226463978706  
"1705", "PPP1R1A", 5.55397864840002, -1.46278246230463, 0.7108939796723, -2  
.05766612762557, 0.0396221940372166, 0.358226463978706  
"1706", "AC099063.4", 5.47468647695681, 1.63846108411101, 0.79662518780665  
9, 2.05675279816619, 0.0397100105926853, 0.358800409375094  
"1707", "PRRC1", 216.780666169508, 0.391611375154643, 0.190424112070405, 2.  
05652199659387, 0.0397322282713776, 0.358800409375094  
"1708", "KAT14", 32.1371067362573, 0.631520149354418, 0.307184584739337, 2.  
05583281430055, 0.0397986338961001, 0.359189661304674  
"1709", "KCND3", 13.6420564713606, 1.19102310029984, 0.579796952790366, 2.0  
5420724370463, 0.0399556376180115, 0.359196497268971  
"1710", "PIK3R4", 56.8535062238302, 0.504565106722518, 0.245540686155121, 2  
.05491446091243, 0.0398872674622676, 0.359196497268971  
"1711", "WDR46", 182.758330248505, -0.48947283459131, 0.238162030845868, -2  
.05520935832162, 0.039858787622418, 0.359196497268971  
"1712", "SQLE", 61.9640525435641, -0.648181781027074, 0.315393491433159, -2  
.05515268587729, 0.0398642594476046, 0.359196497268971  
"1713", "BDKRB1", 22.0348698643799, -0.9332444444942214, 0.454321841522679,  
-2.05414831436324, 0.039961339091206, 0.359196497268971  
"1714", "FBXL20", 157.548208344364, 0.493275099492378, 0.240131142070609, 2  
.05419045292898, 0.0399572620721757, 0.359196497268971  
"1715", "UXT", 688.7532431144, -0.499958795323074, 0.243391249344614, -2.05  
413627921844, 0.0399625035884713, 0.359196497268971  
"1716", "WNT2", 97.4544746599652, -0.978779835908963, 0.476636687179892, -2  
.05351342486893, 0.0400228090782375, 0.359528905560042  
"1717", "AVEN", 106.931642574176, -0.471731353346454, 0.229780796708168, -2  
.05296247599652, 0.0400762169241182, 0.359799000515598  
"1718", "KIAA0040", 51.1145085619268, 1.00555696404041, 0.489879983732062,  
2.0526598298215, 0.0401055805363575, 0.359853040726397  
"1719", "POC1B-  
AS1", 22.7235900742769, 0.735750844674004, 0.358498108773942, 2.0523144381  
159, 0.0401391137398601, 0.35994440855145  
"1720", "C19orf18", 3.47517389182437, 2.10997696528595, 1.028708532954, 2.0  
5109309167196, 0.0402578819582457, 0.360799564178115  
"1721", "PSMC5", 762.712533992668, -0.503379038479122, 0.24549372963831, -2  
.05047615358958, 0.0403179884937908, 0.361128293220096  
"1722", "KANSL1L", 92.692992921124, 0.476013092266303, 0.232176845871871, 2

.05021775741151,0.040343185906485,0.361130165697708  
"1723","SLC25A6",2442.22127736023,-0.525108661470441,0.256151361879311  
,-2.04999363508305,0.0403650519297536,0.361130165697708  
"1724","TNFRSF11B",51.845291265471,0.871643168481958,0.425458629353456  
 ,2.0487142775939,0.0404900622524772,0.361308531534289  
"1725","PTPRD-  
AS1",41.4901100357824,0.882420968735415,0.430649745992143,2.0490456036  
4356,0.0404576558149796,0.361308531534289  
"1726","CLCF1",20.4891846956637,-1.08589905000882,0.529956185970767,-2  
.04903552171899,0.0404586415863841,0.361308531534289  
"1727","ZSWIM1",8.71490424889744,1.1868140097083,0.579332012682191,2.0  
4859041745957,0.0405021824515895,0.361308531534289  
"1728","MT-  
ND3",40921.3987507276,-0.785568306577897,0.383373720157541,-2.04909273  
972947,0.0404530473018404,0.361308531534289  
"1729","CAMKK1",29.0479373982943,-1.16523020276866,0.568996365001866,-  
2.04786932648478,0.0405728051231816,0.361729202414022  
"1730","FNDC10",24.9533219201428,1.0965161244485,0.535539199304833,2.0  
4749927899182,0.0406090875865049,0.361843401818482  
"1731","RPUSD1",41.6383582532214,-0.640243324783593,0.312789675826134,  
-2.04688125684646,0.0406697448259359,0.362174532924207  
"1732","ITGB3BP",91.1193797047118,-0.583943475517713,0.285468639682642  
 ,-2.04556085798737,0.0407995958347141,0.363121114198682  
"1733","TBC1D5",264.982520671054,0.39895975010153,0.195144402791371,2.  
04443347795149,0.040910742848636,0.363900231397418  
"1734","ZGRF1",7.91224697589131,1.2069707583128,0.590851670571418,2.04  
276439998135,0.0410757662588015,0.365048370202802  
"1735","CDC25B",62.4831384288123,0.551274129837632,0.269881948214672,2  
.04264914153922,0.0410871827636628,0.365048370202802  
"1736","CHIC2",254.412383429999,-0.430297297614836,0.210716588027537,-  
2.04206655794276,0.0411449296012431,0.365318105632605  
"1737","MRC2",1568.42900864125,0.509687805845785,0.249618777406065,2.0  
4186484343145,0.0411649399600282,0.365318105632605  
"1738","ZNF704",321.5230379751,0.460174512993631,0.22542762548453,2.04  
134037256765,0.0412170067832233,0.365569712061788  
"1739","LIMCH1",167.475718710474,0.45985321562814,0.225379994309985,2.  
04034620302485,0.0413158560244258,0.365605006094445  
"1740","ENPP6",4.33866085650693,2.53493080447455,1.24198445465822,2.04  
103263528538,0.0412475833501002,0.365605006094445  
"1741","TCF7",83.6650256286933,0.881948717792691,0.432230398281165,2.0  
4045972078758,0.0413045589267475,0.365605006094445  
"1742","ZNF462",124.196703111177,0.583625707838514,0.286028855596951,2  
.04044346022526,0.0413061769901237,0.365605006094445  
"1743","NBPFL1",50.2636234907771,0.61126076246111,0.29968457561576,2.0  
3968042467704,0.0413821658675416,0.365981690675935  
"1744","S0CS7",39.6562421367714,0.601330744593024,0.294876512773976,2.  
03926294073461,0.0414237921759199,0.366139768573283  
"1745","ZNF610",3.04252546264499,2.24948803065188,1.10341551224002,2.0  
3865905970927,0.0414840664219844,0.366462397647501  
"1746","IQCE",55.0674848220836,-0.51184402544711,0.251107304955343,-2.

03834781125996,0.0415151615763077,0.366476756746056  
"1747","CREBL2",285.664330247869,0.315404549628796,0.154753160567373,2  
.03811378373421,0.0415385550013658,0.366476756746056  
"1748","TBCD",124.780875899054,0.374090295914865,0.183585338374122,2.0  
3769156746341,0.0415807880343076,0.366476756746056  
"1749","RALGAPA2",44.0203597220007,0.671830445746722,0.329687383216275  
,2.03778027291387,0.0415719120774556,0.366476756746056  
"1750","UBE3B",76.3756884625833,0.485317007574431,0.238297463335857,2.  
03660165232403,0.041689977082454,0.367019415605956  
"1751","PLCXD1",8.38738334514442,1.29870066967385,0.637647725785363,2.  
03670556195319,0.0416795568300188,0.367019415605956  
"1752","LY86",3.48579082062961,-1.74862981842048,0.859258809123626,-2.  
03504438924977,0.0418464067341432,0.367837504025439  
"1753","AGTPBP1",15.886100349947,-0.895384412665687,0.440000115093122,  
-2.03496404194391,0.0418544912137931,0.367837504025439  
"1754","MYH10",213.630969968524,0.520617960276385,0.255791192373269,2.  
03532402912709,0.0418182799049089,0.367837504025439  
"1755","MYO9A",355.054207418078,0.397000995640376,0.195122461753718,2.  
034624779086,0.041888642140256,0.367927873841622  
"1756","CLIC3",40.0770026848416,-1.08348361780373,0.53270811425211,-2.  
03391611431501,0.0419600539446345,0.368345234371606  
"1757","ZMYM4",202.137524890927,0.339405521206295,0.166983176297931,2.  
03257315336204,0.0420956661164287,0.369115297602246  
"1758","AL591846.2",12.9665440116493,-1.24360514890041,0.6118252799341  
76,-2.03261484885719,0.0420914501343776,0.369115297602246  
"1759","PRRT2",52.5673191859433,-0.612979707739899,0.301686679049606,-  
2.03184214056434,0.0421696395278539,0.369291016189409  
"1760","HSF4",30.9983747964837,0.692406247891068,0.340767205968272,2.0  
3190399711038,0.0421633758188989,0.369291016189409  
"1761","TLE2",126.510112047622,-0.518296838977647,0.255109392774266,-2  
.03166505686547,0.0421875757061011,0.369291016189409  
"1762","CCT3",415.559515502034,-0.517855729963205,0.255349071133649,-2  
.02803060008846,0.0425571250218928,0.371537810521445  
"1763","GPR1",43.4162799791012,1.21214233210222,0.597855510156149,2.02  
748375069025,0.0426129645800787,0.371537810521445  
"1764","ANXA3",25.3119439826204,1.21308502859647,0.598173816682359,2.0  
2798082223756,0.0425622053466571,0.371537810521445  
"1765","NAV3",135.949300850038,0.523479985959327,0.258125401684112,2.0  
2800647493016,0.0425595871701943,0.371537810521445  
"1766","UNC119B",38.0830896304376,0.748799292610267,0.369259726202946,  
2.0278390506056,0.0425766773623463,0.371537810521445  
"1767","GANC",55.8429066411621,0.537228234111613,0.26490791651501,2.02  
798104782638,0.0425621823219178,0.371537810521445  
"1768","MED13",289.928002815681,0.444514725326156,0.219243043017736,2.  
02749751694605,0.0426115581285609,0.371537810521445  
"1769","TMT1",81.7286079245632,0.555224399135141,0.274088569321581,2.  
02571161763302,0.0427943454699773,0.372731848311712  
"1770","KDM6A",82.9587308837023,0.501244598567856,0.247445920217951,2.  
02567331935139,0.0427982725599566,0.372731848311712  
"1771","CCN4",2.48762494865831,-2.01845395459778,0.99701688101711,-2.0



2449325886904,0.0429194248846627,0.373547350198373  
"1772","MXRA5",339.587801994727,0.713881774741524,0.352657950209534,2.  
02428946892411,0.042940376552158,0.373547350198373  
"1773","ZNF529",34.9781896635557,0.703539151068758,0.347633334645009,2.  
.02379657229128,0.04299108705706,0.373777556110874  
"1774","IL7R",27.7132394734464,0.935320873500885,0.462676300003555,2.0  
2154481112108,0.0432233984931067,0.375585506071725  
"1775","DDI2",143.346899785035,0.582568153372314,0.28821965278386,2.02  
126450346254,0.0432523915981227,0.375625699428204  
"1776","AFAP1L2",35.6125730131141,-0.786064200397036,0.388959604754324  
, -2.0209404544555,0.0432859294868415,0.375705294504314  
"1777","CNN2",223.225957541501,0.49773636770288,0.24632199366036,2.020  
67367313201,0.0433135568685454,0.375733527928321  
"1778","CXCL8",298.494388253913,-1.97846324481415,0.979751221804333,-2.  
.01935266910978,0.0434505772404683,0.375880839778945  
"1779","CLTB",835.407319243914,-0.503889149932598,0.24962612532616,-2.  
01857537657254,0.0435313724468942,0.375880839778945  
"1780","CBWD1",100.201530937098,-0.532447217072068,0.263797151385159,-  
2.01839638630011,0.0435499954489261,0.375880839778945  
"1781","RNF38",109.723287081243,0.44822448334293,0.222065708533749,2.0  
1843177995584,0.0435463123903957,0.375880839778945  
"1782","KLHL33",11.2514785538679,1.23642147380622,0.612541840361878,2.  
01850941819054,0.0435382342888351,0.375880839778945  
"1783","AL121839.2",22.0853658581022,1.13915769922554,0.56399484679573  
, 2.01980160935429,0.0434039701560503,0.375880839778945  
"1784","HSD3B7",429.785994825978,-0.647408129911054,0.320625073558182,  
-2.01920617974868,0.0434657942942541,0.375880839778945  
"1785","TAF9B",43.66670707484,0.595263075764743,0.294682507889317,2.02  
001496467623,0.0433818353154878,0.375880839778945  
"1786","AMOT",94.378418901475,0.487870168962503,0.241693784467886,2.01  
854660862132,0.0435343651480305,0.375880839778945  
"1787","SFMBT2",33.6438397608982,1.04970064670542,0.520159255480766,2.  
0180370447032,0.0435874033809457,0.375993185851862  
"1788","KHDRBS3",350.12852440928,-0.54065897768009,0.268125604788173,-  
2.01643919127838,0.04375407083924,0.376377791287324  
"1789","MPP7",17.1337102665311,0.905521355010943,0.449041471682115,2.0  
1656508833995,0.0437409193788223,0.376377791287324  
"1790","SLC3A2",407.196510242183,-0.589280165655225,0.292115824095775,  
-2.01728258809431,0.043666031620726,0.376377791287324  
"1791","BRCA1",43.1598432406233,0.580104581758181,0.287624159993448,2.  
01688405372969,0.0437076145544199,0.376377791287324  
"1792","ADGRG2",17.8025415465514,1.06526511693952,0.528260451913296,2.  
01655284449414,0.0437421982490355,0.376377791287324  
"1793","C15orf61",547.064040000482,-0.433385520827988,0.21495190369487  
5, -2.01619763946441,0.0437793131776255,0.376384892712269  
"1794","RNF213",452.191406675621,0.493011629383064,0.244567473434924,2.  
.01585117783149,0.0438155401356877,0.376486371901687  
"1795","SLC30A1",110.309780362006,0.437927688645727,0.217331012694974,  
2.01502621837207,0.0439019020184136,0.377018283907435  
"1796","IFF02",22.630374528956,0.838859803661864,0.416434513257629,2.0

1438588050674,0.0439690356019411,0.377036986481915  
"1797","TCF4",2689.22579996989,0.460275418846839,0.228490892462715,2.0  
1441472737014,0.0439660094082528,0.377036986481915  
"1798","AF165147.1",10.6563258916465,1.07070823468505,0.53155202880077  
2,2.01430561200315,0.0439774571323051,0.377036986481915  
"1799","S100A8",25.6755942200715,1.00191952687094,0.497651888575333,2.  
01329393070166,0.0440837164923938,0.377711812062052  
"1800","TARBP1",65.3164900296008,0.576952403652358,0.286633580312613,2.  
01285698285285,0.04412967716664,0.377711812062052  
"1801","AC079781.5",18.4338723580802,1.13530866388731,0.56397563227038  
,2.01304559794,0.0441098325937128,0.377711812062052  
"1802","ZSCAN30",61.8345560234234,0.582376894488503,0.289431524044375,  
2.01214051030327,0.0442051273823977,0.378147635182942  
"1803","KIF22",110.742610315395,-0.457573459806261,0.227451651726433,-  
2.01173944586961,0.0442474101461596,0.378299405104298  
"1804","ACE",389.522227504168,0.525650728506944,0.261553918157146,2.00  
972224851598,0.0444605938539032,0.379911338280442  
"1805","FASN",44.6439216236636,0.579914700042563,0.288824851735398,2.0  
0784211108621,0.0446600723268653,0.380844522231312  
"1806","KLHL22",72.015634635379,0.432881052475246,0.215603807438422,2.  
00776163286857,0.0446686277128909,0.380844522231312  
"1807","LGALS1",11826.3766300394,-0.557892613037017,0.277839468635237,  
-2.00796746328885,0.0446467492820531,0.380844522231312  
"1808","ALG13",173.116861287107,-0.346206590229245,0.172389883527468,-  
2.00827672218992,0.0446138940736514,0.380844522231312  
"1809","TTN-  
AS1",62.4807818460807,0.610012180825713,0.303978148456468,2.0067632621  
7268,0.0447748763682897,0.381458372585414  
"1810","E2F4",111.49516928565,-0.474085452465936,0.236260677843822,-2.  
00662021624829,0.0447901170534934,0.381458372585414  
"1811","CKAP2",43.2192914680236,0.591510112304487,0.294859257813485,2.  
00607610793977,0.0448481285110128,0.381741524570548  
"1812","ATP9B",79.1776086690659,0.482443687723189,0.240549736638674,2.  
00558809360852,0.0449002132632148,0.381973944510186  
"1813","DYNC1I1",4.73509822756045,-1.33017382975387,0.663375738004804,  
-2.00515899745527,0.0449460519383123,0.382133322473801  
"1814","PRSS23",1117.9717474547,-0.650659288388371,0.324557784939391,-  
2.00475637492374,0.0449890984191994,0.382133322473801  
"1815","APAF1",64.5760315913277,0.524800664575563,0.261813185008113,2.  
00448523843175,0.0450181066242247,0.382133322473801  
"1816","CD93",7.03934322573158,-1.46335246454097,0.729973395511172,-2.  
00466547622087,0.0449988216838556,0.382133322473801  
"1817","NCF2",9.21457734261307,-1.3591336603794,0.678214249630257,-2.0  
0398865273084,0.0450712759629275,0.382374088590274  
"1818","RPL22L1",518.29199066487,-0.469473740864619,0.234495764527366,  
-2.00205637748238,0.0452786684333893,0.38249721770777  
"1819","FAM198B-  
AS1",12.584956805631,1.13462469550637,0.566785030220304,2.001860732040  
43,0.0452997119744708,0.38249721770777  
"1820","ASL",72.0135083872157,-0.495564728961451,0.247489492250081,-2.

0023667447695,0.0452453023644021,0.38249721770777  
"1821","MINDY3",91.4649423365329,0.433083333080934,0.21629662323606,2.  
00226580795152,0.0452561513129791,0.38249721770777  
"1822","NPM3",81.6601856582018,-0.543954276107478,0.271597909999534,-2.  
.00279256975288,0.0451995577323346,0.38249721770777  
"1823","PPP1R14B",1412.95294721979,-0.530833002289693,0.26518136636280  
8,-2.00177338841913,0.0453091092789094,0.38249721770777  
"1824","H0XC9",324.535110918127,-0.430633528913825,0.215006052288913,-  
2.00289026438737,0.0451890682988374,0.38249721770777  
"1825","PYGL",101.179690638711,-0.407382652222862,0.20346295124888,-2.  
00224487909124,0.0452584010751253,0.38249721770777  
"1826","AC006942.1",11.0745128681252,-1.18279042190007,0.5907489695671  
16,-2.00218787138434,0.0452645296357175,0.38249721770777  
"1827","SH3GL2",3.03314442113434,-1.90938113810295,0.954086141664119,-  
2.00126702896303,0.0453636209000681,0.382747792104296  
"1828","NUP133",73.9418710937474,0.443651004528117,0.221731910537886,2.  
.00084418815448,0.0454091837488407,0.382786345791886  
"1829","SYS1",241.285927096707,-0.332843767771258,0.166358354861987,-2.  
.00076376114316,0.045417854456916,0.382786345791886  
"1830","ARL2",868.928141709033,-0.503316926620314,0.251649686266243,-2.  
.00006975604892,0.045492732028767,0.383207903947237  
"1831","GREB1L",9.34094444137943,1.2032773947669,0.601698181557636,1.9  
9980227902956,0.0455216184107645,0.383241806554852  
"1832","AL513218.2",2.57123078277527,-2.00603941364137,1.0037606945822  
6,-1.99852357685339,0.0456599264772489,0.384196379174013  
"1833","WDR86",167.524606908087,0.751777930769795,0.376497814205029,1.  
99676572454256,0.0458506385888971,0.38540489235618  
"1834","AKR1C8P",5.10566085243141,1.65850557066528,0.830607141087155,1.  
.99673887765341,0.0458535564438037,0.38540489235618  
"1835","ZBTB40",50.905964038656,0.617073950270839,0.309151126363569,1.  
99602685433902,0.0459309998240904,0.385671464952452  
"1836","KLF12",126.175992161438,0.548166418627685,0.274648114852964,1.  
99588633230253,0.0459462967457344,0.385671464952452  
"1837","LDLRAD4",56.4801973453314,-0.682043415811565,0.341746645356381  
, -1.99575745681516,0.0459603296216448,0.385671464952452  
"1838","CPXM2",156.550030735711,0.930349926602182,0.466290135992773,1.  
99521682915592,0.0460192363319512,0.385745801009803  
"1839","HDAC7",537.967036763428,0.440451534419802,0.220746259980157,1.  
99528424381638,0.0460118873719645,0.385745801009803  
"1840","FAM160B1",167.26649536609,0.443646167239882,0.222528062435993,  
1.99366391089434,0.0461887958392883,0.386956678186212  
"1841","SAP25",10.6066693800868,-1.15433303750393,0.579166681831208,-1.  
.99309296220936,0.0462512685122811,0.387269583985233  
"1842","SGSM2",75.7329512976604,0.492768489412343,0.247389159564495,1.  
99187583756627,0.0463846826749584,0.388175832483433  
"1843","ODF2L",497.498781859628,0.354003405393758,0.177826098283976,1.  
99072806978219,0.0465107910116462,0.388387780847522  
"1844","TTC14",250.005256809198,0.413077324250968,0.207498304355624,1.  
99075036074998,0.0465083390977537,0.388387780847522  
"1845","PDLIM3",326.343276994664,-1.39695335153848,0.701672220006982,-

1.99089163245565,0.0464928023264545,0.388387780847522  
"1846","AL353746.1",7.21342877913298,5.81113898716073,2.91824860421009  
,1.99131046572836,0.0464467655806815,0.388387780847522  
"1847","ATG101",188.467166271466,-0.448745655340087,0.225614570491751,  
-1.98899235258608,0.046702047072955,0.389773717178993  
"1848","CCZ1",212.586339380706,-0.633162319039882,0.318393369386477,-1  
.98861653513685,0.046743544881717,0.389868160496088  
"1849","TSC22D1",570.492702693063,-0.589328504898423,0.296378523862336  
, -1.98843187832381,0.0467639460757228,0.389868160496088  
"1850","KCNS3",37.3087415905736,-0.724890375250809,0.365058169447433,-  
1.98568457281214,0.0470683590583835,0.391770386007009  
"1851","SCG5",3.76003967297483,-1.53588083712687,0.77336201254332,-1.9  
8597915622451,0.047035638395926,0.391770386007009  
"1852","ANPEP",469.532619315692,0.487809670212234,0.245653382971999,1.  
98576410514093,0.0470595231699126,0.391770386007009  
"1853","DIPK2A",129.726224927659,0.469648250687951,0.236648057007773,1  
.98458528088623,0.047190631294744,0.39257613675579  
"1854","ACVR2B",38.0023058978499,0.56210730993871,0.283454421498301,1.  
98306065210586,0.0473606550879298,0.392890605555364  
"1855","CPED1",320.150017401326,0.349996772250828,0.176502426126133,1.  
98295728808119,0.0473722006755368,0.392890605555364  
"1856","BAG4",111.884768470894,0.360248268904367,0.181576837321724,1.9  
8399902883024,0.0472559481967009,0.392890605555364  
"1857","PNP",22.4171293970929,-1.02805582543934,0.518467205408802,-1.9  
8287531923786,0.047381358139956,0.392890605555364  
"1858","AC022467.1",14.0782608863921,1.27702310840612,0.64397772508429  
3,1.98302372685168,0.0473647793049853,0.392890605555364  
"1859","KCTD15",7.85063717477148,1.30775598775232,0.659331151051732,1.  
98345851802429,0.0473162362154059,0.392890605555364  
"1860","RNF130",533.507731529005,-0.324427345386803,0.163642895515396,  
-1.98253241831864,0.047419682774395,0.392996994606074  
"1861","FOXJ3",117.625588537668,0.516653456962759,0.260891054436571,1.  
98034178702884,0.0476651363377308,0.393115384145299  
"1862","GSTM3",663.562194517887,0.669570484178495,0.338184277428908,1.  
97989832427751,0.0477149547561849,0.393115384145299  
"1863","SMPD4",75.2631633728487,0.464689333715614,0.234751924740051,1.  
97949104881751,0.0477607464585651,0.393115384145299  
"1864","GTDC1",75.775461489411,0.458127166559895,0.231266003509238,1.9  
8095335937084,0.0475965042937586,0.393115384145299  
"1865","ACVR2A",135.806961384022,0.611070887438926,0.308703836249526,1  
.97947293063438,0.0477627844203845,0.393115384145299  
"1866","EGFLAM",16.188858107876,-0.833510969090428,0.42050912677431,-1  
.98214715453198,0.0474627732250858,0.393115384145299  
"1867","PANK3",136.50442405821,0.461555037745474,0.232908242137088,1.9  
8170332449552,0.0475124549189367,0.393115384145299  
"1868","ENTPD7",14.6296638668846,-1.03839646557456,0.524524064476624,-  
1.97969270792309,0.0477380684577949,0.393115384145299  
"1869","DIXDC1",282.428857328581,-0.482830355106165,0.243837912656539,  
-1.98012831493625,0.0476891122419372,0.393115384145299  
"1870","NCOA6",106.408377382661,0.430234286213025,0.217092838456523,1.

98179861331164,0.0475017847420152,0.393115384145299  
"1871","CHAF1B",4.87785897610471,-1.31480452896081,0.663762225569256,-  
1.98083662840742,0.0476095976898733,0.393115384145299  
"1872","MAGT1",293.248138478506,0.329156366844555,0.166243266146621,1.  
97996811825299,0.0477071112295243,0.393115384145299  
"1873","LINC00892",2.66043187010479,2.28672600242002,1.15523370424659,  
1.97944882841811,0.0477654955889812,0.393115384145299  
"1874","ANGPT2",44.133048851984,-0.826582609118825,0.417661634552694,-  
1.97907238955303,0.047807856585377,0.39325406043948  
"1875","MYLK",26.1871443640361,-2.11809129539023,1.07040812673919,-1.9  
7876981917413,0.0478419279811203,0.393324437242117  
"1876","AC021546.1",14.1350152002092,-1.03675579362772,0.5242462423304  
52,-1.97761225530008,0.0479724656567586,0.394187397707321  
"1877","TSPAN33",4.6338524068055,-1.40963943914626,0.713223906447209,-  
1.97643324403989,0.0481057294791696,0.394861458957082  
"1878","LINC00654",12.9290127884339,0.955429257708529,0.48338544711734  
1,1.97653707492894,0.0480939809816159,0.394861458957082  
"1879","TSPAN9",72.3304422811906,0.478146160387602,0.242041284104338,1  
.97547357326647,0.0482144307085067,0.395541121313475  
"1880","CCL2",1031.4863466281,-1.30628936469013,0.661328821863424,-1.9  
7524940922641,0.0482398513181533,0.395541121313475  
"1881","SRGAP2",142.088034741409,0.489941948996791,0.248174120573369,1  
.9741863005895,0.0483605631381689,0.39575903052744  
"1882","LYPLA1",136.215451319367,-0.395404973984635,0.200289848669606,  
-1.97416382613023,0.0483631177609614,0.39575903052744  
"1883","DIO3OS",202.151994441403,0.787556803563,0.398969277095157,1.97  
397857122508,0.0483841796003898,0.39575903052744  
"1884","IRX3",160.301390661818,0.68441286052394,0.346590355719002,1.97  
470255369376,0.0483019129702033,0.39575903052744  
"1885","TMSB4X",29548.264439055,-0.537634016355767,0.27237349484897,-1  
.97388522203265,0.0483947954942734,0.39575903052744  
"1886","AL356215.1",3.50948213634276,-2.36626490299972,1.1990659822273  
4,-1.97342342962998,0.0484473404140925,0.395825243763767  
"1887","WDR7",55.1283544103386,0.548177156074253,0.277820082201987,1.9  
7313726109873,0.0484799260607195,0.395825243763767  
"1888","LAGE3",123.866892008705,-0.500337904669902,0.253565636230988,-  
1.97320864178186,0.048471796310594,0.395825243763767  
"1889","ETNK2",39.4741565621461,-0.564090424461323,0.286119775652091,-  
1.97151847744782,0.0486646016407805,0.396548190411251  
"1890","NR2F1-  
AS1",20.2267192657779,0.934307131202298,0.473797935500811,1.9719527275  
1605,0.0486150032400811,0.396548190411251  
"1891","ZFAND1",171.836517136938,-0.451161802079671,0.228808097379986,  
-1.97179124010816,0.0486334427614222,0.396548190411251  
"1892","STARD13",38.2464459687721,0.863638023786583,0.438120457659023,  
1.97123418614414,0.0486970953258838,0.396548190411251  
"1893","STON2",71.3671687860237,0.637817522757889,0.323551322435819,1.  
9713024751565,0.0486892884246769,0.396548190411251  
"1894","KLHL8",91.0482502897117,0.474638517470681,0.240883292114908,1.  
97040862943814,0.0487915573764444,0.397107633029509

"1895", "STAT4", 4.88788390568868, 1.56908809186484, 0.797230405343828, 1.96817391979439, 0.0490480299592847, 0.397374873962836  
"1896", "SLC9B2", 78.3506181877532, -0.613655437261367, 0.311928273913037, -1.9672966145815, 0.0491490251248178, 0.397374873962836  
"1897", "PCDHB5", 20.062583429534, 1.08811995813043, 0.553129757798956, 1.96720560191941, 0.0491595124649451, 0.397374873962836  
"1898", "TREM2", 5.94698164324107, -1.68989089331909, 0.858819513345827, -1.96769037854711, 0.0491036735458138, 0.397374873962836  
"1899", "PRRC2B", 352.218327964907, 0.439832691366577, 0.223576595911196, 1.96725730425414, 0.0491535546023462, 0.397374873962836  
"1900", "KLC2", 32.0185310885821, -0.555276124702238, 0.282153176490215, -1.96799529819043, 0.0490685787020769, 0.397374873962836  
"1901", "KDM5A", 359.897392652346, 0.450274026271592, 0.228825708564098, 1.96775978143847, 0.0490956837421908, 0.397374873962836  
"1902", "AC005906.2", 8.80714977875973, -1.83744241143506, 0.933753170279176, -1.96780313033443, 0.0490906938816913, 0.397374873962836  
"1903", "LRRC23", 51.8909028058323, -0.561302526943864, 0.285169568957267, -1.96831144710246, 0.0490322136519008, 0.397374873962836  
"1904", "MON2", 185.017606641127, 0.449563502392816, 0.22848895384852, 1.96755026805742, 0.0491198066787674, 0.397374873962836  
"1905", "SERPINF2", 9.43340775460879, 1.23925187939659, 0.629182263544079, 1.96962303485175, 0.048881589667721, 0.397374873962836  
"1906", "RAB34", 692.007698357936, -0.414160375360113, 0.21035119316117, -1.96889957758778, 0.0489646240810183, 0.397374873962836  
"1907", "CXorf40A", 27.0276013823671, -0.724607215631552, 0.367988267025773, -1.96910412793352, 0.048941134930396, 0.397374873962836  
"1908", "FAM168B", 145.862244918676, 0.386462589233701, 0.196563387450712, 1.96609650579311, 0.0492874639632312, 0.398200344336063  
"1909", "FAM174C", 232.558540442173, -0.520181326993171, 0.264656943476687, -1.96549283823719, 0.049357223768412, 0.39855505730229  
"1910", "ASAP3", 175.519293907917, 0.377837168833221, 0.192334892423489, 1.96447542134626, 0.049474983890283, 0.398731206509643  
"1911", "SERINC2", 6.4023695448577, -1.37586030995119, 0.700753800423988, -1.96340042553994, 0.0495996644246525, 0.398731206509643  
"1912", "LINC01358", 30.0297779347171, -0.972063040275017, 0.494882115926739, -1.96423149875741, 0.0495032515196854, 0.398731206509643  
"1913", "EXOC1", 243.267917069309, 0.43204966177023, 0.220017034286555, 1.96371005168409, 0.0495637262657057, 0.398731206509643  
"1914", "NNT-AS1", 174.056661833506, 0.35608716652794, 0.18137216121669, 1.96329560247404, 0.0496118361391823, 0.398731206509643  
"1915", "HIST1H2BK", 3.47970577175994, 1.77854101151657, 0.905427835588265, 1.9643100660375, 0.0494941450590303, 0.398731206509643  
"1916", "SDK1", 239.859751364708, 0.556331199537664, 0.283338892407814, 1.96348335666156, 0.0495900365064736, 0.398731206509643  
"1917", "AL360020.1", 4.96087520895967, 1.59659698552686, 0.813166748871941, 1.96343122458183, 0.0495960886158869, 0.398731206509643  
"1918", "UBXN1", 866.28527986315, -0.474355924191807, 0.241535489943094, -1.96391811531948, 0.0495395886908851, 0.398731206509643  
"1919", "AN08", 29.4570687204382, 0.661947291405777, 0.337282778847046, 1.9

6258846558532,0.0496940120545383,0.399183530912302  
"1920","SERPINE1",156.899859731269,-1.64758488649067,0.83968664459576,  
-1.96214254102356,0.0497458913241214,0.39939214310486  
"1921","ARHGAP25",4.11372016803943,1.90380495282149,0.971381943283211,  
1.95989329015809,0.0500082640486843,0.400969282623344  
"1922","IL15",7.60027123147409,-1.24238308669552,0.634006946283695,-1.  
95957330432716,0.0500456841518484,0.400969282623344  
"1923","CNT2",339.268702082119,0.318330903880613,0.162425314167708,1.  
95986017026835,0.0500121360993292,0.400969282623344  
"1924","SPART",568.463677367134,0.302847434522836,0.154583176271215,1.  
9591228607665,0.0500984001513176,0.400969282623344  
"1925","KIF23",6.41058995245653,1.28654588030448,0.656657340076723,1.9  
592347511933,0.0500853011248472,0.400969282623344  
"1926","GATA6",32.2179286177121,0.767086200017207,0.391463427715473,1.  
95953477568471,0.050050191389872,0.400969282623344  
"1927","VASH2",108.60636882726,0.56189443844134,0.286914161931387,1.95  
840607747941,0.0501823822051129,0.40097984564448  
"1928","RCTOR",211.209623817753,0.457844322637097,0.233772575693812,1.  
.9585031361282,0.0501710034065638,0.40097984564448  
"1929","ARHGAP23",100.35387391017,0.487870732209291,0.249139427705032,  
1.95822370109521,0.0502037691919459,0.40097984564448  
"1930","PCMTD2",231.660792956389,0.415946164786501,0.212345187474113,1.  
.95882077542826,0.0501337796642016,0.40097984564448  
"1931","HIVEP3",13.137592801836,-0.944202546973159,0.482560689989392,-  
1.95665035830812,0.0503885900230763,0.40114689294859  
"1932","RBM43",263.84943794261,0.364159870202622,0.186077581200428,1.9  
5703247996532,0.0503436497866804,0.40114689294859  
"1933","GTF2H2",43.5830507172032,0.509557962619061,0.260444267753403,1.  
.95649521110415,0.0504068460357716,0.40114689294859  
"1934","BBS9",71.1359815182882,0.435592653397314,0.222585794954955,1.9  
5696519396248,0.0503515606637562,0.40114689294859  
"1935","C12orf76",214.027635954773,-0.44666185490568,0.228250285631687  
, -1.95689505346964,0.0503598082548127,0.40114689294859  
"1936","KANSL1",274.12727119949,0.421877336292631,0.215586958824992,1.  
9568778120531,0.0503618357899146,0.40114689294859  
"1937","AC245060.5",49.9446209717367,0.877386039539571,0.4484332920253  
87,1.95655865686685,0.0503993797680673,0.40114689294859  
"1938","ALMS1",51.9679183149013,0.58170101164194,0.297415126996962,1.9  
5585549906438,0.0504821788502311,0.401416531182622  
"1939","ARHGEF3",116.604543700064,0.509299872403516,0.260409505354899,  
1.95576529247431,0.0504928092094132,0.401416531182622  
"1940","POLR3GL",329.588979580601,-0.452772678919476,0.231599367200873  
, -1.9549823662807,0.0505851516404439,0.401736276423206  
"1941","CSGALNACT1",21.5653486771724,-1.28196619864563,0.6557122648619  
67,-1.95507430216438,0.0505743009124699,0.401736276423206  
"1942","ANKIB1",260.408253840541,0.433593585267471,0.221867810348144,1.  
.95428793652895,0.0506671747001916,0.401797272062245  
"1943","NOC4L",78.7258316723224,-0.628619192289853,0.321666867457711,-  
1.95425533645456,0.0506710280174508,0.401797272062245  
"1944","MT-

ND2",22898.6593506799,-0.416247437127037,0.212992623834343,-1.95428099  
63728,0.0506679950036253,0.401797272062245  
"1945","F2R",88.189280974225,-0.868731340724393,0.444695240192408,-1.9  
5354315091953,0.0507552693798091,0.402051632831325  
"1946","Z95114.1",18.5246070724943,-1.1831133465531,0.60560608327252,-  
1.95360215036133,0.0507482861357064,0.402051632831325  
"1947","BRD7",369.404656644329,-0.352168906905015,0.180312462983909,-1  
.9531035241665,0.0508073294744697,0.402257310656883  
"1948","TOGARAM1",115.919817773423,0.423518924157068,0.216875616910625  
,1.95281945564033,0.0508409923247819,0.402317195424288  
"1949","CCDC136",33.895226545415,0.699803360635453,0.358409848392737,1  
.95252268812833,0.0508761799880061,0.402389078766092  
"1950","PGPEP1",74.3206039506057,0.483066630043596,0.247457943087412,1  
.95211608088473,0.0509244244427331,0.40256410399217  
"1951","OMA1",68.9339537814537,0.448761600692394,0.229923583551086,1.9  
5178586624928,0.0509636330075053,0.402666631270551  
"1952","APOBR",6.22423105641241,1.74090032712645,0.892052566819653,1.9  
5156697248583,0.050989637641266,0.402666631270551  
"1953","H2AFY",322.202471480872,-0.35955104857029,0.184277266610208,-1  
.95114164207151,0.0510401987745683,0.402859531034291  
"1954","NES",66.2801483432612,-0.584314527733108,0.299520650119267,-1.  
95083219637924,0.0510770104950766,0.402922189569264  
"1955","SPINT2",4.97867081977691,-1.48147567273756,0.759483577021807,-  
1.95063556021439,0.0511004139220182,0.402922189569264  
"1956","TMEM255A",35.3592874985603,0.782345718577324,0.401162080269364  
,1.95019857822058,0.0511524552039993,0.403126327694095  
"1957","NOCT",16.8048256560502,-1.57236898232352,0.806733005097043,-1.  
94905746063331,0.0512885630413367,0.403875058367847  
"1958","EML2",16.2089801503318,0.742815135827154,0.381133553143864,1.9  
4896284963599,0.051299861452108,0.403875058367847  
"1959","WDYHV1",54.8198499773489,-0.52638275960414,0.2702443545354,-1.  
94780298189425,0.0514385418614788,0.404553634078926  
"1960","ABCC3",4.12023910656729,-1.63612147979061,0.839912534522364,-1  
.94796649953679,0.0514189717777686,0.404553634078926  
"1961","TASOR",239.747815927631,0.36509699865155,0.187534003370142,1.9  
4683093247333,0.0515550072039406,0.404754850442607  
"1962","FAM114A1",880.067381908708,-0.28367364872115,0.145740644808418  
, -1.94642784169132,0.0516033679031,0.404754850442607  
"1963","PXDC1",621.253237585486,-0.494346684369235,0.25395833572455,-1  
.94656608911399,0.0515867774331833,0.404754850442607  
"1964","RELA",188.617088975436,-0.298820264862122,0.153528642939772,-1  
.94634863658208,0.0516128749743767,0.404754850442607  
"1965","PDE1B",6.45943073385715,-1.31415612019783,0.675291787267953,-1  
.94605671944353,0.0516479267480122,0.404754850442607  
"1966","FGF14",70.8750402615883,0.58022765590814,0.29799542502977,1.94  
710256323624,0.0515224397790573,0.404754850442607  
"1967","NIN",179.609229419601,0.452525719387993,0.23251629453273,1.946  
21078190412,0.0516294253097904,0.404754850442607  
"1968","ASB7",29.5578377707382,0.601264581537347,0.309030449572115,1.9  
4564834102873,0.0516969959635722,0.404933532915887



"1969", "STMN1", 62.2813649158279, -0.765972578283255, 0.39453916147646, -1.94143611857643, 0.0522054008684229, 0.405291469603775  
"1970", "CDC14A", 48.2196464971728, 0.692500400758128, 0.356481373769549, 1.94259911376408, 0.0520646140799542, 0.405291469603775  
"1971", "SERPINE2", 63.608554284476, -0.903347053070177, 0.465019229611222, -1.94260150021197, 0.0520643255144898, 0.405291469603775  
"1972", "MFSD4B", 39.8032357890323, 0.729282239207134, 0.374979909979665, 1.94485683045442, 0.0517922119781428, 0.405291469603775  
"1973", "AC006001.2", 6.66024983277528, 1.47779131690457, 0.760945020900905, 1.94204742302534, 0.0521313595530647, 0.405291469603775  
"1974", "RH0BTB2", 36.7308404989846, 0.601773975781564, 0.309812055222327, 1.9423839893826, 0.0520906320724594, 0.405291469603775  
"1975", "ZEB1-AS1", 83.489423988611, 0.500142020715637, 0.257416485689306, 1.94292925480808, 0.0520247066591657, 0.405291469603775  
"1976", "ANXA11", 981.373855079866, -0.33220149460517, 0.170919507621299, -1.94361368827026, 0.0519420539064797, 0.405291469603775  
"1977", "STAMBPL1", 55.298439022075, 0.606968983762847, 0.312653189403478, 1.94134908689371, 0.0522159493112615, 0.405291469603775  
"1978", "DGKZ", 78.5307039067228, -0.387763319061124, 0.199636524967629, -1.9423465677135, 0.0520951591071619, 0.405291469603775  
"1979", "UCP2", 56.3835600357885, -0.872251775252092, 0.449047133366594, -1.94245038090467, 0.0520826012595563, 0.405291469603775  
"1980", "ZNF740", 57.2415143377211, 0.454137356019874, 0.233889071469324, 1.941678391243, 0.0521760462414987, 0.405291469603775  
"1981", "SLC39A9", 104.937953332612, 0.479145315156795, 0.246748388216305, 1.94183766962144, 0.0521567550227538, 0.405291469603775  
"1982", "SNX33", 166.7617064852, 0.397980923595864, 0.204961274675939, 1.94173716095933, 0.0521689275722996, 0.405291469603775  
"1983", "PYCARD", 282.120503516072, -0.518146590360073, 0.266706034463753, -1.94276290524087, 0.052044811781115, 0.405291469603775  
"1984", "RBL2", 254.737624637592, 0.393118027330737, 0.202275768233964, 1.9434756360734, 0.0519587163546413, 0.405291469603775  
"1985", "ZNF415", 19.5806331240138, 0.786706462598258, 0.404596244394005, 1.9444235419846, 0.0518443972162706, 0.405291469603775  
"1986", "LINC01260", 8.151713215257, -1.27299625870226, 0.654821437511224, -1.94403571077412, 0.0518911448886195, 0.405291469603775  
"1987", "SLC6A6", 48.5437870708334, -0.861739640666621, 0.444183236125279, -1.94005439778365, 0.0523730792487021, 0.406306500563031  
"1988", "RXRA", 258.810388809347, 0.365966575635958, 0.188689991552001, 1.9395123855051, 0.0524389778708623, 0.406408669622595  
"1989", "RNF185", 78.8677224557951, 0.430113057030141, 0.221752537462926, 1.93960827664509, 0.0524273142449933, 0.406408669622595  
"1990", "PYG01", 61.142745917375, 0.559729112008981, 0.288707343036946, 1.93874220905199, 0.0525327362488937, 0.406930718229496  
"1991", "MRPL30", 84.2018872788725, 0.388665124201056, 0.200553039578994, 1.93796675940166, 0.0526272781106789, 0.407450538434854  
"1992", "COL5A1", 1206.67247624926, 0.727672722367923, 0.375564899243331, 1.93754188379692, 0.0526791387026056, 0.407450538434854  
"1993", "PLEKHM1", 118.259249607147, 0.363169165954086, 0.18743298710924, 1

.93759471881235,0.0526726873015282,0.407450538434854  
"1994","FUCA1",121.668254904415,-0.367174258864838,0.189534970277564,-  
1.93723753630863,0.0527163138075704,0.407454806069119  
"1995","APOL6",487.248855268197,0.516983992679148,0.26688490933756,1.9  
3710462671855,0.0527325551805315,0.407454806069119  
"1996","EML2-  
AS1",3.50636990283211,-1.80210134785891,0.930550153825048,-1.936597764  
72158,0.0527945314258028,0.407729309583542  
"1997","UBXN7",208.626752206318,0.406267167491034,0.209840789900883,1.  
93607338059932,0.0528587142364159,0.408020570833426  
"1998","DCUN1D3",221.227154427758,0.607377302098142,0.313867909975571,  
1.93513666989854,0.0529735266746437,0.40870215900382  
"1999","ANKMY2",110.698444484733,0.361102477770055,0.186797229743589,1.  
.93312544444973,0.0532207463035635,0.409584525346695  
"2000","KRIT1",208.568057939166,0.332635354369188,0.172069142363315,1.  
93314937123848,0.0532177995701835,0.409584525346695  
"2001","AL731577.1",2.79669871834867,2.69541412430149,1.39386803714003  
,1.93376564529881,0.0531419485246234,0.409584525346695  
"2002","AC010542.2",7.39737346435269,1.31128185831036,0.67804134946014  
6,1.9339260936732,0.0531222153548884,0.409584525346695  
"2003","PCBP3",10.9529715934782,1.39192034404764,0.71998602213233,1.93  
326023181018,0.0532041481774616,0.409584525346695  
"2004","PRIMA1",22.5140900538286,0.872279616809527,0.451418477771564,1.  
.93230817913248,0.0533214794971677,0.410154993237944  
"2005","MRPS30-  
DT",30.2520644444285,0.59271801399198,0.306786191276468,1.932023118530  
25,0.0533566524853358,0.410220846913442  
"2006","SAMD5",3.56823191921618,-1.70702586785842,0.883697755234192,-1.  
.93168519185163,0.0533983736007992,0.410265609659157  
"2007","SDSL",19.2683433078983,1.00292034957363,0.519232225469988,1.93  
154488565465,0.0534157040925026,0.410265609659157  
"2008","TNP01",296.74958145381,0.303751271482897,0.157369524989655,1.9  
3017848597348,0.0535847262852643,0.41135884247378  
"2009","TCF7L2",1033.46925714399,0.373942569483706,0.193759423374125,1.  
.92993229940445,0.0536152267342384,0.411388113543198  
"2010","ECM1",1494.82288964292,-0.620720869058938,0.321870463937917,-1.  
.92848036276688,0.0537954044923919,0.411745859111332  
"2011","LYPLAL1-  
AS1",17.9526668595994,1.51549514619609,0.785765415119438,1.92868649731  
26,0.0537697935238335,0.411745859111332  
"2012","TRMT112",971.354878929007,-0.447494590721276,0.231979964071552  
, -1.92902258827513,0.0537280580866009,0.411745859111332  
"2013","DICER1",269.589056571425,0.46382234044507,0.240466436723107,1.  
92884440242758,0.0537501816560066,0.411745859111332  
"2014","ORAI3",335.981137996962,0.529717093472166,0.274562233918413,1.  
92931520811261,0.0536917428780541,0.411745859111332  
"2015","HSPB7",4.35102742734033,-1.65927386568742,0.860547344051073,-1.  
.92816104443051,0.0538350979673637,0.411845178742884  
"2016","WDR13",353.775813224729,-0.40713808853592,0.211195838589384,-1.  
.92777514583275,0.0538831004538392,0.412007933281712

"2017", "LUC7L3", 637.330300014183, 0.463773739172324, 0.240696751476413, 1.92679683596715, 0.0540049539614657, 0.412734935704508  
"2018", "PDGFB", 2.57701915993458, -2.02336702237351, 1.05027667323997, -1.92650858000272, 0.0540409015563043, 0.412805003711809  
"2019", "SMIM26", 608.987195929898, -0.454769467370721, 0.236180160954869, -1.92551933884752, 0.0541644189531367, 0.413543594929471  
"2020", "CISD1", 155.618954631647, -0.557690697925819, 0.289683873375092, -1.92516998419067, 0.0542080958917922, 0.413643786059308  
"2021", "CMIP", 103.58785044761, 0.375155749074363, 0.194887601365025, 1.92498520401867, 0.0542312093172794, 0.413643786059308  
"2022", "GLUD1", 477.598283316326, -0.324913157151405, 0.168817903001082, -1.92463685056746, 0.0542748058465973, 0.413771578696982  
"2023", "HSPA4L", 10.981443300776, 1.04931133220922, 0.545324471433623, 1.9241963036257, 0.0543299822889118, 0.413987482443685  
"2024", "AC003991.1", 3.44626513100432, 2.41064253722858, 1.25331989980816, 1.92340561862742, 0.054429129259918, 0.414538057085789  
"2025", "FASTKD3", 28.0977116736005, -0.73209669318662, 0.380717897201075, -1.92293742576532, 0.0544879088466171, 0.414780797466964  
"2026", "SATB1", 114.955209469787, 0.533538842312871, 0.277613036209396, 1.9218796408049, 0.054620904151949, 0.41558797507517  
"2027", "AC009404.1", 18.18617282863, 0.758751064925443, 0.394895029395585, 1.92139938070825, 0.0546813765659276, 0.41584283165455  
"2028", "CSRNP1", 473.878099931504, -0.632541253248258, 0.329355311326289, -1.92054365451422, 0.0547892645389438, 0.416186556534542  
"2029", "SLC37A4", 27.9097387407974, -0.579820367231004, 0.301921516791516, -1.92043406973006, 0.0548030935474019, 0.416186556534542  
"2030", "CENPB", 133.925405581148, -0.520751195247471, 0.271168286223904, -1.92039859269341, 0.0548075711816491, 0.416186556534542  
"2031", "CRABP2", 826.552933212987, -0.75990713504584, 0.395855632445666, -1.91965725067747, 0.0549012073925841, 0.416395991620877  
"2032", "CACNA2D1", 164.315075232058, 0.42826801834291, 0.223197206556697, 1.91878753748704, 0.0550112276958699, 0.416395991620877  
"2033", "MAB21L1", 23.764189984129, 0.955513181317192, 0.498033481083677, 1.91857217960142, 0.0550384992362428, 0.416395991620877  
"2034", "CYP46A1", 26.3933690364566, 0.838765562648716, 0.436918863467084, 1.91972842736259, 0.0548922115398984, 0.416395991620877  
"2035", "MSI2", 50.9844857840605, 0.568070588020098, 0.296105823815675, 1.91847151366304, 0.0550512507897079, 0.416395991620877  
"2036", "ANKRD29", 17.2424070405636, -0.752678451890778, 0.392264025652677, -1.91880570908438, 0.0550089270769184, 0.416395991620877  
"2037", "HSBP1L1", 45.6212129927865, -0.842395564074782, 0.438947668484759, -1.91912527291173, 0.0549684817379485, 0.416395991620877  
"2038", "POLR2I", 428.001011582647, -0.481187033740891, 0.250707293094328, -1.91931805334377, 0.0549440946297816, 0.416395991620877  
"2039", "RNPEPL1", 181.068390195463, -0.342845524918075, 0.178782446069298, -1.91766883413813, 0.0551530159348956, 0.416961128316045  
"2040", "KREMEN1", 254.754238858552, 0.499573637927203, 0.260540540807111, 1.91745068302847, 0.0551807006075158, 0.416965931306302  
"2041", "CHL1", 940.972992530658, 0.420659735669869, 0.219501020699007, 1.91643635337215, 0.0553095772609754, 0.417468224051147

"2042", "TNIP2", 194.613328058898, -0.359661078497036, 0.187663145065936, -1.91652483693944, 0.0552983249158011, 0.417468224051147  
"2043", "PSMD7", 487.169293444596, -0.336990350140671, 0.175855774841491, -1.9162882222345, 0.0553284191849817, 0.417468224051147  
"2044", "FAM177A1", 299.800428168567, -0.322535115355763, 0.168342823100207, -1.91594217927408, 0.0553724558621984, 0.417596089586981  
"2045", "MAP4", 595.169441593609, -0.409483629481357, 0.213882593970764, -1.91452526303908, 0.055553074329467, 0.418434382655329  
"2046", "ECPAS", 159.035640935493, 0.371141717761804, 0.193865239216728, 1.91443148478461, 0.0555650458187129, 0.418434382655329  
"2047", "EHD1", 153.341677943479, 0.456341982025528, 0.238342144954653, 1.91465081474513, 0.0555370500883757, 0.418434382655329  
"2048", "ZNF148", 392.778333071688, 0.293747093834521, 0.153484819020946, 1.91385112682991, 0.0556391806360758, 0.418583684482727  
"2049", "DTX4", 29.1463834392849, 0.751677234197205, 0.392729121851224, 1.91398394561114, 0.055622207122, 0.418583684482727  
"2050", "HEBP1", 644.841211950233, -0.488252386807234, 0.255229775571413, -1.91299148273012, 0.0557491428339061, 0.419206359407152  
"2051", "SOS1", 197.388428338075, 0.39010101275579, 0.203999401528664, 1.91226547643071, 0.0558421515813202, 0.419340332456852  
"2052", "FGD2", 3.71676423544241, -1.64610487920694, 0.86083652837556, -1.9122154148282, 0.0558485697394692, 0.419340332456852  
"2053", "ZNF483", 42.5589040053764, 0.594589526398926, 0.310930620694904, 1.91229003135834, 0.0558390037363081, 0.419340332456852  
"2054", "PLOD1", 126.675635000975, 0.443553733544771, 0.23201284662556, 1.91176368031298, 0.0559065122491462, 0.419460402007547  
"2055", "ARID5A", 70.3053450139055, -0.745798366623831, 0.390157923572049, -1.91152946426348, 0.0559365740810061, 0.419460402007547  
"2056", "N4BP2L1", 174.428950344851, 0.400445432252956, 0.209497754353396, 1.91145453319493, 0.0559461943903676, 0.419460402007547  
"2057", "CASP9", 27.4423881134615, -0.590201583581365, 0.308840727167535, -1.91102251634449, 0.0560016873917638, 0.419468421352788  
"2058", "TMEM120B", 38.7084375952848, 0.642630877931377, 0.336258848556921, 1.91111960529596, 0.0559892122259599, 0.419468421352788  
"2059", "AL139339.1", 17.3612094539683, -0.893443621510109, 0.467681651534741, -1.91036705968299, 0.05608596899354, 0.419496485637278  
"2060", "HERPUD1", 892.959928217291, -0.366747013411141, 0.191965536512337, -1.91048362156178, 0.0560709732193879, 0.419496485637278  
"2061", "KCNJ12", 70.266618509521, 0.562344935075184, 0.294385960348793, 1.9102301427993, 0.0561035877198245, 0.419496485637278  
"2062", "AL022323.4", 36.313013436245, 0.915563155142849, 0.479315546167043, 1.91014700537957, 0.0561142882506693, 0.419496485637278  
"2063", "FAM43B", 39.9405421774015, -0.896699251836585, 0.469609832204206, -1.90945587239465, 0.0562033090631209, 0.419818189169675  
"2064", "TMEM192", 94.4044154575906, 0.453925296255791, 0.237767692469758, 1.90911259448559, 0.0562475683785691, 0.419818189169675  
"2065", "ALDH5A1", 17.2027448779608, 0.901352083544866, 0.472211994007614, 1.9087869325283, 0.0562895832636331, 0.419818189169675  
"2066", "CCT6A", 303.338087533437, -0.376884772393622, 0.197450405737893, -1.908756636813, 0.0562934931569067, 0.419818189169675

"2067", "C1RL", 223.589718396232, 0.453704475375288, 0.237695248376767, 1.90876544009045, 0.056292357003461, 0.419818189169675  
"2068", "C1QTNF6", 92.312587921808, 0.859255932666859, 0.45037674818446, 1.9078603327784, 0.0564092703713082, 0.420478192830617  
"2069", "BMP8B", 4.39380129359362, 2.28616680321772, 1.198799694816, 1.90704653421572, 0.0565145618286573, 0.420652810520885  
"2070", "GPATCH4", 97.0338783712236, -0.516014933948887, 0.270577886894021, -1.90708464713156, 0.0565096270279578, 0.420652810520885  
"2071", "AL118506.1", 6.69814828894673, 1.43623570622111, 0.753016306318341, 1.90731023242136, 0.056480425941136, 0.420652810520885  
"2072", "MGST3", 2241.88401234623, -0.473019753302586, 0.24810529640107, -1.90652823685769, 0.0565817057729998, 0.42094932166544  
"2073", "MPH0SPH10", 242.066775345709, -0.390058793298275, 0.2046449167743, -1.90602727615495, 0.0566466668901225, 0.421229315056072  
"2074", "OSBPL10", 101.89575095196, 0.656489747653987, 0.344679417047815, 1.90463867345731, 0.0568270558221341, 0.421276997532558  
"2075", "PHLDB2", 268.394837167028, 0.489706754908537, 0.257130660740192, 1.9045054895392, 0.0568443824111399, 0.421276997532558  
"2076", "ANKRD37", 35.0731903019001, -0.648593033751037, 0.340529269539697, -1.90466163048996, 0.0568240696663472, 0.421276997532558  
"2077", "WAC-AS1", 184.325202583329, 0.487515089241894, 0.255834364017915, 1.90558876292223, 0.0567035811858943, 0.421276997532558  
"2078", "RTN1", 5.85937515405218, -1.1738339755457, 0.61616464563325, -1.9050654461671, 0.0567715643386429, 0.421276997532558  
"2079", "MEX3B", 101.789602995937, 0.550482159130352, 0.289038664772323, 1.90452775431955, 0.0568414855640381, 0.421276997532558  
"2080", "ZNF787", 103.728945190453, -0.521717533637044, 0.273908505119618, -1.90471461778526, 0.0568171777967618, 0.421276997532558  
"2081", "SC01", 112.4343044896, 0.370450435110088, 0.194541997438319, 1.90421831783413, 0.0568817570301757, 0.421351410197097  
"2082", "NINL", 37.4007268856711, 0.654555564595766, 0.343895559518135, 1.90335567435918, 0.0569941507146935, 0.421981187928434  
"2083", "WDFY3", 161.709918391215, 0.447652738439747, 0.2352786971665, 1.90264883234608, 0.0570863827102505, 0.422461156734763  
"2084", "SPSB1", 332.28368882586, -0.560241907844838, 0.294498122272886, -1.90236156183607, 0.0571239025539861, 0.422535968267609  
"2085", "TNFAIP8", 39.8892602017881, -0.607428335792239, 0.319424326471481, -1.90163455145133, 0.0572189476204617, 0.423036008426579  
"2086", "INSYN1", 23.5979318017735, -0.790043207175499, 0.415543886809826, -1.90122687940555, 0.0572723018004245, 0.423227484301795  
"2087", "TMEM97", 28.3881872602593, -0.57623748810389, 0.303211843723239, -1.90044518389545, 0.0573747221271129, 0.42378118907017  
"2088", "SLC2A5", 11.4912640303861, 1.14269538496108, 0.601527554608787, 1.89965592798861, 0.0574782875241975, 0.424091382186703  
"2089", "FAM131B", 7.56050938040595, 1.13808187991065, 0.599149302192613, 1.89949629540715, 0.0574992532449049, 0.424091382186703  
"2090", "ARC", 45.957048935609, -0.942372740339815, 0.496078251711742, -1.89964534241949, 0.0574796776080204, 0.424091382186703  
"2091", "SEMA3G", 2.93838769287022, -2.13909777892798, 1.12658888816326, -1

.89873857394019,0.05759885711843,0.424582784679396  
"2092","PLPBP",255.241931382714,-0.325668896575244,0.171533735873466,-  
1.89857053434362,0.0576209656535386,0.424582784679396  
"2093","SOCS5",189.883593383377,-0.458455312890226,0.241546364158169,-  
1.89800129879008,0.0576959109373831,0.424728971871901  
"2094","FZD2",21.9477644074092,0.919682099753875,0.484513684500167,1.8  
981550556258,0.0576756594015928,0.424728971871901  
"2095","CARF",55.4878860420485,0.487021698068803,0.256840094638448,1.8  
9620588154034,0.057932825766456,0.425457126817493  
"2096","LRAT",4.95569139819788,1.89373770707864,0.998434213718453,1.89  
670754573386,0.0578665472638826,0.425457126817493  
"2097","PAM",1433.30539704944,0.463259545677149,0.244241417615681,1.89  
672804145814,0.0578638407653482,0.425457126817493  
"2098","AC009403.1",10.9486613143056,0.930704745093433,0.4907512935189  
28,1.89648964227852,0.0578953283269465,0.425457126817493  
"2099","SWAP70",412.771467131606,0.424069347318736,0.223634904605947,1  
.8962574203967,0.0579260136870042,0.425457126817493  
"2100","AC114760.2",3.36548609387724,2.00637279556872,1.05869923821397  
,1.89513010225027,0.0580751675089548,0.425916658492218  
"2101","DHTKD1",51.9351439472758,0.53730502215256,0.283551685424308,1.  
89491034535215,0.0581042803617969,0.425916658492218  
"2102","SF3B2",571.941785568008,-0.291724351246406,0.1539256588925,-1.  
89522886142162,0.0580620880852187,0.425916658492218  
"2103","IQCD",12.3817103118631,-0.835022858599868,0.440669031288365,-1  
.894897983093,0.0581059184436675,0.425916658492218  
"2104","TMEM265",108.237910302085,-0.560533495552063,0.295867142837894  
, -1.89454459246656,0.0581527612906191,0.426057421718105  
"2105","AC082651.1",7.38540979306901,1.19778818225643,0.63234191002313  
8,1.89420970407071,0.0581971805701618,0.426180303320211  
"2106","NANOS1",10.6273485255502,1.1581716441282,0.61160330942252,1.89  
366477631024,0.0582695195251621,0.426305004024857  
"2107","GLCE",124.265630172254,0.385966741448412,0.203817099961635,1.8  
93691655514,0.0582659495703145,0.426305004024857  
"2108","MYOM1",27.5518281280133,0.658724857412208,0.347911021444054,1.  
89337162898168,0.0583084656148915,0.426387569949503  
"2109","ZNF514",51.9873624979031,0.504806219116401,0.266672289433844,1  
.89298340741786,0.0583600760727322,0.426562623357595  
"2110","PTPN23",125.775290429899,0.331825787071183,0.175390734463183,1  
.89192312858943,0.0585012236909857,0.4266843721812  
"2111","ABCB5",73.3598085739149,0.893763015001236,0.472275736573301,1.  
892460157886,0.0584296972832832,0.4266843721812  
"2112","VIM-  
AS1",26.1643956847051,-0.713732297899129,0.377273082949048,-1.89181876  
512383,0.0585151321953329,0.4266843721812  
"2113","RECQL5",24.9678200439403,0.632513859865229,0.334307064337477,1  
.89201463965092,0.0584890302842445,0.4266843721812  
"2114","CBX7",143.855652419886,0.481192273219821,0.254275415712215,1.8  
924058067982,0.0584369329461799,0.4266843721812  
"2115","RAB3GAP1",210.096678228492,0.327866035596486,0.173356601151035  
,1.89128094009433,0.0585868516137238,0.427005351123193

"2116", "GLIDR", 22.7153309876266, 0.638362332202531, 0.337615961673112, 1.89079428898746, 0.0586518098468649, 0.427096138987305  
"2117", "NUP50", 110.92778319678, 0.426006238200197, 0.22530803717202, 1.89077248884355, 0.0586547211311142, 0.427096138987305  
"2118", "CERS6", 18.045401054866, -0.75416136404571, 0.399001992058481, -1.89011929528205, 0.0587420070681347, 0.427529763434984  
"2119", "AC024560.1", 2.6976092415675, -1.71634577278925, 0.908209636497926, -1.88981233386547, 0.0587830634105301, 0.427612581968553  
"2120", "ZNF629", 41.5381346176991, 0.625634218016335, 0.331090050429652, 1.88961950745562, 0.0588088662843551, 0.427612581968553  
"2121", "LINC01359", 16.2523998376939, 0.983805011777796, 0.520819317799448, 1.88895645410109, 0.0588976638840002, 0.427678431800733  
"2122", "CCDC9B", 9.70624241581943, 1.11373212829977, 0.589594501607938, 1.88897984167493, 0.0588945298745348, 0.427678431800733  
"2123", "AC022467.2", 4.00763972362919, 2.19769178959625, 1.16354617100844, 1.88878778028338, 0.0589202708138569, 0.427678431800733  
"2124", "CHMP1B", 284.805498750048, -0.365649212932205, 0.193595955046971, -1.88872341285999, 0.0589288997174672, 0.427678431800733  
"2125", "PTPMT1", 237.094813287233, -0.45912831827808, 0.243212877742834, -1.88776319140284, 0.0590577487339833, 0.428309921813188  
"2126", "MRGPRF", 283.340864945001, -0.410874428821829, 0.217663256095831, -1.88766095018321, 0.0590714819185753, 0.428309921813188  
"2127", "NAF1", 50.1146218671135, -0.502389402134271, 0.266219802666361, -1.88712258480594, 0.0591438396497871, 0.428632951669707  
"2128", "LRFN4", 52.9568774144937, -0.534849403591613, 0.283487053936937, -1.88668017168288, 0.059203356196847, 0.42886265778872  
"2129", "FBXL19", 17.1662120744, 0.821334712487464, 0.435453255042395, 1.88616046148857, 0.059273334777763, 0.429167898355667  
"2130", "ATP11C", 120.425131776312, 0.419826763010876, 0.222608471284828, 1.88594243780466, 0.0593027119323015, 0.429179016167337  
"2131", "ITGAX", 12.2054483703396, -0.984731798211863, 0.522277290933228, -1.88545781198394, 0.059368055125884, 0.429450290833178  
"2132", "TTC17", 261.893343140839, 0.301734144069413, 0.160068558723764, 1.88503067982343, 0.0594256958427583, 0.429565788498246  
"2133", "RABEP1", 243.103120388752, 0.362293520149744, 0.192226685808382, 1.88472021262902, 0.0594676219692025, 0.429565788498246  
"2134", "PPM1N", 6.09241432453567, -1.32132202000417, 0.701020197172812, -1.88485585056324, 0.0594493021264731, 0.429565788498246  
"2135", "GPRASP1", 40.788485520539, 0.592168582726144, 0.31423604233551, 1.88447059835957, 0.05950134818787, 0.4296080947616  
"2136", "POMT2", 32.4338210240042, 0.584902651393898, 0.31044526135231, 1.88407659645389, 0.0595546153962771, 0.429791384051317  
"2137", "RFTN1", 455.433661620407, 0.502558829840869, 0.266821575511165, 1.88350147051673, 0.0596324407420377, 0.430151649058732  
"2138", "ZNF770", 121.762001005549, 0.402442486313962, 0.213709161678412, 1.88313165029188, 0.0596825289212955, 0.430311591824963  
"2139", "MT-ND5", 7548.95367510035, -0.380821714545509, 0.202269072599596, -1.8827481196356, 0.0597345119307677, 0.430485040398684  
"2140", "UCHL5", 119.789361786567, -0.337052497860267, 0.17904353313906, -1

.88251701667708,0.0597658516440395,0.43050962761349  
"2141","TMEM167A",469.755443329586,-0.326807351247872,0.17375311848769  
2,-1.88087186055899,0.0599893518905549,0.431468705041339  
"2142","PCY0X1L",24.6003875458119,0.62561649255996,0.332695882547382,1  
.88044555216538,0.0600473803224013,0.431468705041339  
"2143","LRTOMT",34.9452481573014,-0.637677401237241,0.339062699819632,  
-1.88070643446318,0.0600118639082327,0.431468705041339  
"2144","GCHFR",50.3763760812437,-0.696360497556667,0.370178280821267,-  
1.88114898586633,0.0599516549730882,0.431468705041339  
"2145","GABPB1-  
AS1",297.151060395826,0.754916719055804,0.401484918744432,1.8803115230  
7455,0.0600656337668485,0.431468705041339  
"2146","CRKL",94.6328172906305,0.458514290184042,0.24385141426893,1.88  
030195173842,0.0600669374647236,0.431468705041339  
"2147","FBX04",72.3237833368093,-0.453892137265174,0.24147796939872,-1  
.87964201618626,0.0601568829299835,0.431511563688086  
"2148","CX3CL1",3.13134961539694,-1.68588602614084,0.896852475709622,-  
1.879780757484,0.0601379640146629,0.431511563688086  
"2149","HPS4",120.213565187246,0.384690460136472,0.204650462826326,1.8  
7974390491819,0.0601429887896864,0.431511563688086  
"2150","REEP2",7.00593417772038,-1.13132980128916,0.602125380048843,-1  
.8788940622257,0.0602589597789453,0.432042727903462  
"2151","SMAD1",65.088764750986,0.45269668281101,0.24099777397438,1.878  
42682256117,0.0603227990457229,0.432299371124974  
"2152","GSTM5",319.941661736041,0.61874379272662,0.329446853849999,1.8  
7812931128595,0.0603634774169828,0.432389871925088  
"2153","BTNL9",3.01992454635575,-2.12083971182133,1.12948191002759,-1.  
87771020765577,0.0604208195449453,0.432533934964827  
"2154","BEGAIN",4.77774979381244,2.26417691725732,1.20590669298395,1.8  
775722287889,0.0604397078114977,0.432533934964827  
"2155","R3HDM4",82.8357396908001,-0.447993833857958,0.238698622858094,  
-1.87681784039571,0.0605430644434568,0.433072546819437  
"2156","CTSC",93.6284966523693,0.52528204107606,0.27996405971829,1.876  
2481212932,0.0606212171042935,0.433430455316644  
"2157","PGBD2",19.2840731617864,-0.653966108011155,0.348762646839945,-  
1.87510363835286,0.0607784671231073,0.433820377081887  
"2158","COX17",337.42682521576,-0.412031592470932,0.219746434579444,-1  
.87503198065301,0.0607883240023922,0.433820377081887  
"2159","LINC01277",6.1482329535586,-1.23902850117388,0.660764351414843  
, -1.87514429088198,0.0607728757507607,0.433820377081887  
"2160","DOCK9-  
DT",4.12646899277483,-1.31713418688512,0.702427063444896,-1.8751187922  
9927,0.0607763827907334,0.433820377081887  
"2161","EFHD1",313.363425992794,0.530426833639069,0.283164861971265,1.  
87320852575591,0.0610395954726234,0.433880996562517  
"2162","SUN1",477.4181659874,0.266358054508057,0.142121932849144,1.874  
1516468875,0.0609095264913003,0.433880996562517  
"2163","KDM7A-  
DT",78.1320579425458,-0.638972422919178,0.341011454786196,-1.873756479  
2942,0.0609639973965314,0.433880996562517



"2164", "FICD", 35.8949164929628, -0.579227519348796, 0.309142629302916, -1.87365786677461, 0.0609775966865974, 0.433880996562517  
"2165", "PCNX1", 128.565600065545, 0.442558916403399, 0.236252386518005, 1.87324633171344, 0.0610343771039176, 0.433880996562517  
"2166", "CPSF2", 96.5352464853292, 0.420617371639091, 0.224552961111948, 1.87313215357422, 0.0610501382772688, 0.433880996562517  
"2167", "ZNF90", 17.3686871152885, 0.745218920442353, 0.397517401082676, 1.87468251304893, 0.0608364140226871, 0.433880996562517  
"2168", "SLC5A3", 179.459189283135, -0.685663569154995, 0.365963562136339, -1.87358425836819, 0.0609877493892548, 0.433880996562517  
"2169", "MED14", 55.5307379850691, 0.458048079075407, 0.244392762596388, 1.8742293110859, 0.060898825803109, 0.433880996562517  
"2170", "MAP3K13", 127.261281334459, -0.341867440716372, 0.182624385248478, -1.8719703847393, 0.0612107008360359, 0.434821637505758  
"2171", "C21orf62-AS1", 29.0496354822232, 0.818103628376115, 0.43722896655234, 1.87111031281177, 0.0613297924555017, 0.435466951037107  
"2172", "DENND3", 15.1307272020456, -0.940212237756818, 0.502601185827459, -1.87069243819808, 0.0613877235400928, 0.435477109236323  
"2173", "RWDD2B", 84.7438426871295, 0.394273803686337, 0.210745040402681, 1.87085685590977, 0.0613649244649259, 0.435477109236323  
"2174", "TRNAU1AP", 143.668041398728, -0.327812337529711, 0.175295584591806, -1.87005473237136, 0.061476217748292, 0.435557925285147  
"2175", "SLC40A1", 239.698467028793, -0.553635066404347, 0.296067199542632, -1.86996420832706, 0.0614887882940216, 0.435557925285147  
"2176", "GPR150", 7.47499959195599, -1.24514994848384, 0.665951788522793, -1.86972986625026, 0.0615213398964164, 0.435557925285147  
"2177", "GNAL", 52.5623918818907, 0.642855230104653, 0.343781805995457, 1.86995128565108, 0.061490582964192, 0.435557925285147  
"2178", "ZNF177", 15.0934062584719, 0.862717332466405, 0.461446661962551, 1.86959274729008, 0.0615403932060364, 0.435557925285147  
"2179", "RBBP4", 304.146143718646, 0.257166995484863, 0.137622915432037, 1.86863499205451, 0.0616736139743016, 0.436300486192684  
"2180", "DAAM2", 21.2600408689651, 0.787850798689951, 0.421765902940865, 1.86798125025392, 0.061764684439263, 0.436744316803321  
"2181", "DHRS11", 17.1111320745854, -0.75860845865807, 0.406204340863222, -1.86755379582098, 0.0618242917720193, 0.436965363441393  
"2182", "MDM1", 63.8276667650329, 0.424810521426126, 0.227598632468883, 1.86648977991643, 0.0619728726145268, 0.43781477147247  
"2183", "TWF2", 347.008818023668, -0.446102360299676, 0.239069732510947, -1.86599263576475, 0.0620423958192436, 0.437968579720448  
"2184", "AC010624.5", 2.40090978135704, 2.22003360758254, 1.18977465840791, 1.8659277972463, 0.0620514679279571, 0.437968579720448  
"2185", "OBSL1", 116.583232439652, 0.425166759199144, 0.227909131282183, 1.86550998113686, 0.0621099544645945, 0.43798030561378  
"2186", "ROBO3", 216.330327362143, -0.456608563430208, 0.244755567191829, -1.86556967291509, 0.0621015959267117, 0.43798030561378  
"2187", "PN01", 62.372488479295, -0.438436745490415, 0.235143179274831, -1.86455225638494, 0.0622441903547323, 0.43872619767636  
"2188", "PLD1", 99.820318574796, 0.599036218739764, 0.321354221912616, 1.86

409942018019,0.0623077439604326,0.438954473985423  
"2189","AP000350.5",3.03686307908232,1.95117026638742,1.04681244688466  
,1.86391580668929,0.0623335286120072,0.438954473985423  
"2190","ST8SIA4",5.06110600623208,-1.54432157654996,0.828746234919321,  
-1.86344324894617,0.0623999299977776,0.439221425075681  
"2191","EGR3",125.561836486164,-0.818464511698842,0.439301536382758,-1  
.86310414126511,0.0624476157151997,0.439256221217273  
"2192","HMCN2",223.122350317309,-0.856907671233454,0.460010471505791,-  
1.8628003584972,0.0624903595932196,0.439256221217273  
"2193","AL359532.1",3.26156807494087,1.72432202180987,0.92557131252809  
2,1.86298127272342,0.0624649010700397,0.439256221217273  
"2194","LRRRC59",215.757621157596,-0.381369066957476,0.204763998499303,  
-1.86248105014795,0.0625353140861158,0.439371862642422  
"2195","SRPK2",371.208138154918,0.327799219035516,0.17602157815889,1.8  
6226724282417,0.0625654303445908,0.439383193057798  
"2196","UBFD1",101.426703599724,0.367885379776814,0.19757850481881,1.8  
6197066383402,0.0626072254296284,0.439476493623735  
"2197","MAT2B",160.21773056144,0.440825529812153,0.236795026517642,1.8  
6163339785902,0.06265478234064,0.439570636538856  
"2198","LRRK2",150.554553094859,0.52600878340179,0.282576916711411,1.8  
6147116871188,0.0626776684471233,0.439570636538856  
"2199","ZKSCAN3",17.9099041584047,0.713004917826044,0.38329457376783,1  
.8602009175792,0.0628571052953146,0.439828542045971  
"2200","NELFE",313.796818893437,-0.360249907474212,0.193651725161776,-  
1.86029795073223,0.0628433833366264,0.439828542045971  
"2201","VEZT",158.989035964351,0.338820836314018,0.18212963980693,1.86  
032782293531,0.0628391594529206,0.439828542045971  
"2202","BTBD6",300.455556243743,-0.460912296356358,0.247712696457975,-  
1.86067288010226,0.0627903859113363,0.439828542045971  
"2203","AL683813.1",20.3839974455874,0.947415160274791,0.5092886798423  
84,1.86027138982944,0.0628471392046936,0.439828542045971  
"2204","LINC01625",9.95580884057773,1.15170109533927,0.619332009147798  
,1.85958593828214,0.0629441303018147,0.440037990295906  
"2205","HELLPAR",217.22913495078,-0.646010924730674,0.347393805911908,  
-1.85959252507366,0.0629431976851722,0.440037990295906  
"2206","TRANK1",83.5851070065207,0.452839239545434,0.243609174466723,1  
.85887596613194,0.0630447214814594,0.440516477467714  
"2207","AK1",268.324545115382,-0.596647194984676,0.321002485426149,-1.  
85869961160143,0.0630697285612225,0.440516477467714  
"2208","FBLIM1",24.4333017310828,-0.652689154546717,0.351191878661879,  
-1.85849728938383,0.0630984279582947,0.440517331058475  
"2209","FAM3B",6.86169635839308,-1.3129497785375,0.706537706694999,-1.  
85828691957453,0.063128280351874,0.440526229798161  
"2210","HIF1AN",58.1962951128535,0.426337359181448,0.229578295529612,1  
.85704558088966,0.0633046694812686,0.441557230793554  
"2211","SDC2",1983.82051644936,-0.371527609581613,0.200091065369207,-1  
.85679260038959,0.0633406668847471,0.441608493907  
"2212","TES",85.1570712517735,-0.891416378540939,0.48026791409426,-1.8  
5608147532001,0.063441945752813,0.441715263676429  
"2213","RGS3",9.23038059460776,-1.08598918684126,0.585032545088503,-1.

85628850216696,0.0634124470651672,0.441715263676429  
"2214","RNASEH2A",20.3135835506574,-0.740211949770842,0.39880172412262  
9,-1.85609014454319,0.0634407102715662,0.441715263676429  
"2215","BTN3A1",81.470753470397,0.554792132935223,0.298979355798676,1.  
85562020311798,0.063507711939689,0.441964728374556  
"2216","ZNF277",144.248824167845,-0.405306536767474,0.218443676973776,  
-1.85542810111244,0.063535117617776,0.441964728374556  
"2217","SLC2A13",70.2231191624727,0.401437859233022,0.216432768179444,  
1.85479242634919,0.0636258739908299,0.442396412976384  
"2218","AGPS",233.166344601326,-0.398833534487486,0.215130628658349,-1.  
.85391330362761,0.0637515642921007,0.442937414832253  
"2219","BRMS1",130.396168098053,-0.390655719991177,0.210727133175507,-  
1.85384631824235,0.0637611497575588,0.442937414832253  
"2220","LRMDA",105.404020803416,0.479886232813787,0.25898462531716,1.8  
5295259217069,0.0638891539835322,0.443626715610878  
"2221","TOP1MT",30.1311783518363,-0.552374600028276,0.298218696909384,  
-1.85224670938764,0.0639904042318853,0.443929829538484  
"2222","CHMP4B",419.898880777856,-0.288980901183143,0.156000945097411,  
-1.8524304516405,0.0639640359058557,0.443929829538484  
"2223","NPEPPS",442.241690256274,0.434877772789909,0.234824016297446,1.  
.8519305633503,0.0640357944557873,0.444044881482664  
"2224","LNX1",58.289398937788,-0.531595816973303,0.287089657070265,-1.  
85167178225162,0.0640729683738428,0.444102881062404  
"2225","STX6",63.0189927612376,0.414014895542605,0.223676856670564,1.8  
5095097322642,0.0641766065770357,0.444196731153956  
"2226","CRPPA",13.7585737965856,0.947924009429968,0.512160045925212,1.  
8508355287995,0.0641932180732266,0.444196731153956  
"2227","AC007036.3",10.6473497514308,0.914921900741396,0.4944519371071  
8,1.85037580415642,0.0642594038581461,0.444196731153956  
"2228","VDAC2",849.759115143755,-0.432036549635914,0.233485773440598,-  
1.85037633458138,0.0642593274613041,0.444196731153956  
"2229","ZNF319",21.6272118053933,0.665952130934023,0.359845771201874,1.  
.85065987772974,0.0642184996158499,0.444196731153956  
"2230","PLXNB2",118.522537306508,0.497997783909381,0.269108072284487,1.  
.8505494082055,0.0642344037575639,0.444196731153956  
"2231","RPS15",12089.8522808584,-0.418937185924451,0.226436849101057,-  
1.85012813765785,0.064295083331699,0.44424415488935  
"2232","POLR2A",334.695590348505,0.455755655647543,0.246427012429701,1.  
.84945494064925,0.0643921484758902,0.444715487793838  
"2233","AC116407.2",19.3543443259699,-0.896253624419785,0.484763743383  
183,-1.84884624036608,0.0644800182371223,0.445122920342696  
"2234","COX15",86.3629968449528,0.419895456360075,0.227162693430498,1.  
84843492573108,0.0645394501370863,0.445333761800889  
"2235","MTR",235.035240796807,0.484896114702955,0.26245174832134,1.847  
56290557934,0.0646656000848714,0.445392069319477  
"2236","MY03B",2.66816896521653,2.62001145683187,1.41825902568792,1.84  
734340439754,0.0646973860450612,0.445392069319477  
"2237","SKIL",270.852815328156,-0.687689273234281,0.372331898189121,-1.  
.84697920478728,0.0647501542228315,0.445392069319477  
"2238","RSPH9",2.83507829579933,-2.07752227396234,1.12475793607206,-1.

84708389897437,0.0647349816486439,0.445392069319477  
"2239","PRKCSH",420.749631387236,0.255362369139886,0.138226543564984,1  
.84741918993173,0.0646864100869782,0.445392069319477  
"2240","IER2",3067.22669683744,-0.466110236615726,0.252330110381033,-1  
.84722400315948,0.0647146819484926,0.445392069319477  
"2241","TNMD",94.0334995951753,-1.51076698382364,0.817734097237426,-1.  
84750396116232,0.0646741345583909,0.445392069319477  
"2242","ACVR1B",73.3399800867582,0.508462523886602,0.275396586091614,1  
.84629203688624,0.0648498133661224,0.445857316207273  
"2243","PCBP2-  
OT1",14.1530679069012,0.909420598996227,0.492613426470167,1.8461141132  
7682,0.0648756380313275,0.445857316207273  
"2244","EBNA1BP2",212.989864323728,-0.437148702630816,0.23723136601247  
1,-1.8427103885067,0.065371306435287,0.446191448217459  
"2245","VCAM1",55.0812638253754,0.998470664590117,0.541816942268812,1.  
84281920090779,0.065355412415685,0.446191448217459  
"2246","PLGLB2",9.68582380905134,1.01668814062047,0.551333216645125,1.  
84405384969737,0.0651752927362006,0.446191448217459  
"2247","CLK1",522.896463974791,0.328636259157864,0.178354604806964,1.8  
4260036074511,0.065387381221099,0.446191448217459  
"2248","PCDH7",87.7622080368701,0.993021691843958,0.538115053701973,1.  
84537058573709,0.0649836489259615,0.446191448217459  
"2249","PCDHGA5",38.8332874892674,0.577092071279014,0.312858514115283,  
1.84457844438386,0.0650988850276396,0.446191448217459  
"2250","BTN3A2",186.516113181336,0.61797388163519,0.335271300723974,1.  
84320542885942,0.0652990225639085,0.446191448217459  
"2251","ZFAND5",1204.74811453045,0.552564592201611,0.299802392716319,1  
.84309600465551,0.0653149945844301,0.446191448217459  
"2252","ASB6",34.1272488169873,0.51315861468899,0.278297526003853,1.84  
392086432664,0.0651946739277942,0.446191448217459  
"2253","TPI1",985.145742708936,-0.338126999729299,0.183309790112969,-1  
.84456596410329,0.065100701933874,0.446191448217459  
"2254","NDUFA4L2",15.8506502239406,-1.24684987766016,0.676375025967757  
, -1.84342979824864,0.0652662827301983,0.446191448217459  
"2255","IL4R",210.841478355618,0.340908897226494,0.184886021286512,1.8  
4388681661443,0.0651996367809205,0.446191448217459  
"2256","MBTD1",79.1309134267636,0.460251017973396,0.249427700494122,1.  
84522816456082,0.0650043551111104,0.446191448217459  
"2257","PARD6G-  
AS1",10.493982668811,-0.902401449818798,0.489398354733587,-1.843899639  
40528,0.0651977676722839,0.446191448217459  
"2258","CDC37",486.127738559597,-0.32353890678373,0.175566595395962,-1  
.84282725340797,0.065354236329012,0.446191448217459  
"2259","ZNF284",18.2618056212015,0.783577369699097,0.425094098629441,1  
.8433033350156,0.0652847344968158,0.446191448217459  
"2260","ZDBF2",42.2931485644742,0.620534067771888,0.336858929062185,1.  
84211850788534,0.0654578171386234,0.446276979739885  
"2261","INTS6",722.600742941827,0.410976725868909,0.223084647971273,1.  
84224566596726,0.0654392234485433,0.446276979739885  
"2262","NDUFB2",997.477700980919,-0.449017183825434,0.243890727827167,

-1.84105885379796,0.0656129345194127,0.447136775250551  
"2263","ZCWPW1",49.5108956937185,0.460688343841848,0.250300217997231,1  
.84054311869175,0.0656885399271817,0.447383279213905  
"2264","PAPPA",15.5966626508742,-0.940813245809297,0.511195906617776,-  
1.8404162350086,0.065707151744423,0.447383279213905  
"2265","ESRG",24.8634852783615,0.626674366117932,0.340807049260343,1.8  
3879519944793,0.0659453146150415,0.448662911533949  
"2266","CDK9",133.904221511254,-0.369080285983167,0.200746054777866,-1  
.8385431603703,0.0659824080731406,0.448662911533949  
"2267","MED21",229.053702598617,-0.475171963758675,0.258446045214576,-  
1.83857316665133,0.065977991044069,0.448662911533949  
"2268","AC245297.3",413.765066644592,-0.380231784709001,0.206858991485  
89,-1.83812065396701,0.0660446283640528,0.448690148185048  
"2269","XP07",95.0129571709431,0.427999389895026,0.232834494770239,1.8  
3821297749449,0.066031028238313,0.448690148185048  
"2270","ZNF587",43.9983715111758,0.703614142626611,0.382921087445253,1  
.83749123695677,0.0661374089440291,0.44912253694811  
"2271","RAD51B",46.0338403620121,0.604711571254985,0.329236396804521,1  
.83670935875909,0.0662528129337715,0.449708107166045  
"2272","MTMR12",65.3880948974176,0.436546891060428,0.237740250035514,1  
.83623467627049,0.0663229562181417,0.449948139992076  
"2273","TAF6",96.5692573222474,-0.335860050651958,0.182922830630342,-1  
.83607507873458,0.0663465534999668,0.449948139992076  
"2274","HOXB6",9.3554706499059,-1.1194295019129,0.605675374104914,-1.  
83587280865522,0.0663764700643983,0.44995307213839  
"2275","FAM124A",9.0217139523172,0.955901622165,0.520820231469202,1.83  
537728453532,0.0664498070489838,0.450252209081356  
"2276","GDPGP1",11.2534231069748,0.855121441981781,0.466046130685528,1  
.83484291721068,0.0665289675627317,0.450590525034934  
"2277","TUFG",590.886748934313,-0.495416686678473,0.270101881393752,-1  
.83418450890485,0.0666266101431288,0.45105366506646  
"2278","NBP14",90.2578800903913,0.843800096270981,0.460279655494543,1  
.83323352704861,0.066767849969087,0.451194121841831  
"2279","MAMDC2",134.360881305506,-1.26312556497426,0.68887007265076,-1  
.83361945179847,0.0667105027290314,0.451194121841831  
"2280","EIF5A",658.949090090581,-0.421659244142813,0.229977147823147,-  
1.83348323141685,0.0667307400286068,0.451194121841831  
"2281","UNC119",39.1370637666918,-0.597847429304904,0.326147292474716,  
-1.83305961171286,0.066793706522417,0.451194121841831  
"2282","AGPAT3",75.4133731289127,0.510758603311488,0.278581407850002,1  
.83342674320354,0.0667391335660245,0.451194121841831  
"2283","RASA1",124.108553883398,0.371976572534176,0.203114731090762,1.  
83136186398986,0.0670465494912015,0.451755594876089  
"2284","MBLAC1",18.733128889479,-0.776558684599487,0.42404293727885,-1  
.83132087892511,0.0670526630604276,0.451755594876089  
"2285","MOSPD3",130.510601581187,-0.582168770517914,0.317768532722582,  
-1.83205292711018,0.0669435355975754,0.451755594876089  
"2286","RPL41",26729.6055681284,-0.447101333733838,0.244065505528878,-  
1.83189071624436,0.0669677039832483,0.451755594876089  
"2287","ANKRD10-

IT1",12.6907201409869,0.981120210796308,0.535740273330937,1.8313355549  
999,0.0670504738395196,0.451755594876089  
"2288","DNASE1L1",13.8231015788598,-0.789258196681043,0.43088068481449  
, -1.83173259906243,0.0669912693492346,0.451755594876089  
"2289","EN1",100.989230462913,0.563629030533431,0.30788339047695,1.830  
65747606683,0.0671516839111657,0.452223201313368  
"2290","ZKSCAN1",400.47860630202,0.458837105856457,0.25069413240029,1.  
83026663393868,0.0672100781192946,0.452223201313368  
"2291","AL441992.1",9.13648339161956,-0.956341015825649,0.522509537997  
225,-1.83028432263896,0.0672074344164744,0.452223201313368  
"2292","HNRNPA0",1048.69400397671,-0.290420339010882,0.158741583850943  
, -1.8295164503561,0.0673222772368089,0.45278049895524  
"2293","GLIPR1L2",14.7032682635413,0.933534062942981,0.510368521342233  
, 1.82913722909057,0.0673790530361472,0.452964719822159  
"2294","AREG",71.7134828562453,-0.866100191940034,0.473650510295257,-1.  
.82856383158996,0.0674649751078838,0.453147098600448  
"2295","SUGCT",9.71086430094319,-0.954761869368972,0.522095289106698,-  
1.8287119023858,0.0674427784676885,0.453147098600448  
"2296","MAD2L2",117.556034666499,-0.43378059950001,0.237333958276164,-  
1.82772243235103,0.0675912197120011,0.453205155224227  
"2297","TMEM135",117.891563039658,0.360458675744001,0.197210042709735,  
1.82779066821939,0.067580974279467,0.453205155224227  
"2298","NR2C2AP",80.9758335252781,-0.471118509374435,0.257680407261107  
, -1.82830551372519,0.0675037127905402,0.453205155224227  
"2299","ZFP82",38.1779916778947,0.543443166256377,0.297299735048222,1.  
82793020709632,0.0675600268694979,0.453205155224227  
"2300","FAM225A",12.7697367914755,1.00065984820676,0.547578581126016,1.  
.82742693505113,0.0676356025890519,0.453305571265319  
"2301","LATS2",298.357805250677,0.370946506476419,0.203056540747693,1.  
82681387711286,0.067727758667291,0.45352884442063  
"2302","AC003102.1",5.0528378732583,1.33552969099917,0.731010095494351  
, 1.82696477002278,0.0677050665699607,0.45352884442063  
"2303","UIMC1",80.1530978154445,-0.391863010832499,0.214535966220592,-  
1.82656091533656,0.0677658144719953,0.453586639203564  
"2304","AL139220.2",3.51008226166168,-1.59462827277058,0.8735760938178  
62,-1.82540282873521,0.0679402627540675,0.453704411262789  
"2305","IVNS1ABP",131.585542971048,-0.550301289615572,0.30134857261499  
9,-1.8261287413451,0.0678308718236941,0.453704411262789  
"2306","HLX",43.7484062740953,0.641768674860135,0.351647930042547,1.82  
503185723995,0.0679962220581437,0.453704411262789  
"2307","BOLA3",169.568556151552,-0.4443631835271,0.243502805871202,-1.  
82487910945117,0.0680192743573575,0.453704411262789  
"2308","RBM12B",87.0982718319015,0.426578196283643,0.233609751884474,1.  
.82602906275333,0.0678458842382754,0.453704411262789  
"2309","RPL6",10057.3695924944,-0.480610250254921,0.263283336652097,-1.  
.825448797354,0.067933331242481,0.453704411262789  
"2310","PFN1",1396.5557344754,-0.47414815889633,0.259782244432981,-1.8  
2517538845367,0.067974566556038,0.453704411262789  
"2311","MORC2",47.3258204365298,0.472869878533475,0.259151254727148,1.  
82468681863549,0.0680483035251098,0.453704411262789

"2312", "GPR82", 9.72499053663343, -0.914511767856025, 0.500948851723902, -1.82555916578896, 0.0679166913922817, 0.453704411262789  
"2313", "HS3ST1", 3.89128927494098, 1.68617126836983, 0.924393377146645, 1.82408410754153, 0.0681393577758679, 0.454115088679206  
"2314", "SIRT7", 70.2966719255157, -0.391275216756235, 0.214566240677577, -1.82356374199702, 0.0682180522826982, 0.454443075167586  
"2315", "AC006059.1", 11.4020522367251, -0.934948316539284, 0.512782365876184, -1.82328484510529, 0.0682602604072547, 0.454463217822172  
"2316", "SYNRG", 186.409931160865, 0.398764160199385, 0.218722124793046, 1.82315419885709, 0.0682800397324781, 0.454463217822172  
"2317", "PYROXD2", 58.0714999847469, 0.515551112038217, 0.282923289591331, 1.82222931446508, 0.0684201983632788, 0.454611446009742  
"2318", "AC074032.1", 44.2692258230531, -0.504653699297664, 0.276859688180015, -1.8227778215568, 0.0683370481095008, 0.454611446009742  
"2319", "RAB37", 5.41430394899223, 1.59467458826375, 0.875031399745533, 1.82241984542211, 0.0683913056363809, 0.454611446009742  
"2320", "KIAA1671", 94.0608840122363, 0.598204716738721, 0.328281890791489, 1.8222288024979, 0.0684202760131432, 0.454611446009742  
"2321", "ZNF714", 40.7237303035245, 0.745116100333897, 0.408950183178532, 1.82202168132691, 0.068451695944307, 0.454624253761953  
"2322", "NFIC", 1945.37099036594, -0.298555548839551, 0.163929854872583, -1.82123963369338, 0.0685704382006899, 0.4552167548939  
"2323", "JTB", 1022.25710865502, -0.402419877998109, 0.221037999798949, -1.82059138412463, 0.0686689934996858, 0.455312721061959  
"2324", "MKLN1", 311.08211065316, 0.400972586428466, 0.220235381845436, 1.82065471528037, 0.0686593599486694, 0.455312721061959  
"2325", "ADAM33", 349.75446749734, 0.455516510206491, 0.250206572446158, 1.82056172926677, 0.0686735047985115, 0.455312721061959  
"2326", "AC069243.1", 2.40530668515813, -1.93080043849656, 1.06102393804213, -1.81975200489765, 0.0687967797335163, 0.455933946514254  
"2327", "POLR1A", 49.4068795817673, 0.517244392185084, 0.284582661516871, 1.81755413147129, 0.0691323076521915, 0.456913840441873  
"2328", "ST3GAL6", 7.2443852382894, -1.33574878550166, 0.734642786424486, -1.81822895451375, 0.0690291462929244, 0.456913840441873  
"2329", "SPEF2", 46.8864454854009, 0.494611602488056, 0.272135944815438, 1.81751661958327, 0.0691380458725678, 0.456913840441873  
"2330", "BTRC", 50.7931969930327, 0.428615975738821, 0.23580250509967, 1.81769050993607, 0.069111449037264, 0.456913840441873  
"2331", "KLF5", 35.103129927666, -0.844614967029688, 0.464584657853901, -1.81800012710557, 0.0690641133521722, 0.456913840441873  
"2332", "FN3K", 26.9922461394998, 0.609433493741247, 0.335174578130853, 1.81825691297901, 0.0690248749640532, 0.456913840441873  
"2333", "AP5S1", 47.1671161440244, 0.534580661674337, 0.294141865244772, 1.81742459962129, 0.0691521238891268, 0.456913840441873  
"2334", "INPP4A", 42.3322217242149, 0.572731722809807, 0.315257765399648, 1.81670932699711, 0.0692616328394938, 0.457441332571036  
"2335", "KIAA0825", 27.1917490899227, 0.562288264360502, 0.309546289525606, 1.81649169570805, 0.0692949806540361, 0.457465578921613  
"2336", "EXOC6B", 76.4086350905956, 0.466175694417446, 0.256802281017263, 1.81530978841308, 0.069476315589387, 0.457878326126721

"2337", "JCHAIN", 53.6825195764216, -0.868905452373246, 0.478589866239566, -1.81555338645282, 0.0694389095483121, 0.457878326126721  
"2338", "AC021321.1", 6.32602412151021, -1.23893684300299, 0.6824476520802 35, -1.815431321694, 0.0694576513069936, 0.457878326126721  
"2339", "PGM2L1", 57.6917094308133, -0.727543398903312, 0.400760251217913, -1.81540808174539, 0.0694612200271128, 0.457878326126721  
"2340", "RCOR3", 141.296006915763, 0.33679987497679, 0.185661642285313, 1.8 1405200789519, 0.0696697192229007, 0.458398512537266  
"2341", "AC016575.1", 5.81364999053364, -1.26723741043812, 0.6985784944107 35, -1.8140229345409, 0.0696741949318725, 0.458398512537266  
"2342", "LIMK1", 55.2769233557046, -0.492320358563418, 0.271375341920465, -1.81416762141826, 0.0696519233891702, 0.458398512537266  
"2343", "PLD6", 13.7725090332949, 0.803181896773605, 0.442681468956916, 1.8 1435626538904, 0.0696228943425248, 0.458398512537266  
"2344", "AL590399.1", 8.32380245029761, 1.05182831578085, 0.57990591371207 , 1.81379132529953, 0.069709858539036, 0.458437486936536  
"2345", "LINC01232", 12.1152661289913, 0.926953362083796, 0.51121534219412 5, 1.81323463045012, 0.069795640716204, 0.458805885560889  
"2346", "GLB1", 167.606223821092, 0.396632385560116, 0.218792988211923, 1.8 1282036870367, 0.0698595313208506, 0.459030125878479  
"2347", "BDKRB2", 285.259131623651, 0.762151686484292, 0.420497553736856, 1 .81249969164206, 0.0699090215392918, 0.459159593961731  
"2348", "PRKG1", 73.1240127996717, 0.443269660879847, 0.244596472295024, 1. 81224878969305, 0.0699477633997348, 0.459218387055755  
"2349", "AGA", 70.7876250353433, -0.600173486013164, 0.331351074047237, -1. 81129180805856, 0.0700956930947281, 0.45922444374632  
"2350", "TSC1", 125.853349670743, 0.478498602768866, 0.264177160464799, 1.8 1127922613365, 0.070097639710353, 0.45922444374632  
"2351", "ARHGDIB", 96.2843249532053, -0.584210406172038, 0.322447120820574 , -1.81180221018975, 0.0700167634962569, 0.45922444374632  
"2352", "PRMT7", 58.5182470231984, 0.403131224370954, 0.222557890765338, 1. 81135444348729, 0.0700860030989813, 0.45922444374632  
"2353", "SETBP1", 254.085207238428, -0.568512892603654, 0.313755174202347, -1.81196340123784, 0.0699918517533612, 0.45922444374632  
"2354", "SHKBP1", 69.9713258950147, -0.519559237261637, 0.286891075033554, -1.81099825848842, 0.0701411212470431, 0.459314096866257  
"2355", "RNF165", 7.10865789558202, 1.11636161713796, 0.616608741403391, 1. 810486200045, 0.0702204224840547, 0.459638136981615  
"2356", "POM121", 112.544729139451, 0.445923475683629, 0.246363663758658, 1 .81002128674488, 0.070292486173019, 0.459677734201348  
"2357", "YTHDF3", 176.731480533625, 0.353507368095679, 0.195289630463224, 1 .81016968108939, 0.0702694777805532, 0.459677734201348  
"2358", "MOSPD2", 100.117756587212, 0.363143485356465, 0.200646158739468, 1 .80987010983845, 0.0703159323546402, 0.459677734201348  
"2359", "USP24", 79.1896909104695, 0.484884017110895, 0.268060959025118, 1. 80885727960654, 0.0704731787787927, 0.459968368301616  
"2360", "GMPBP", 60.6246066513849, -0.653215446638521, 0.361111258324097, -1.80890357633841, 0.0704659847178336, 0.459968368301616  
"2361", "SEL1L3", 18.7408640633267, 0.97958816117306, 0.541412308902291, 1. 80932007836905, 0.0704012914464506, 0.459968368301616



"2362", "EEF2K", 269.095816667561, 0.495636447417273, 0.274011682801739, 1.80881501967159, 0.0704797460868257, 0.459968368301616  
"2363", "PARP15", 11.755904963511, 1.07982715779362, 0.597112412688768, 1.8084151909206, 0.0705419054024342, 0.460179209385748  
"2364", "PPP4R1", 110.551607370605, -0.33063665334735, 0.18295326013224, -1.8072192488309, 0.0707281008183965, 0.461198677713868  
"2365", "AF117829.1", 113.383759344277, 0.608923696022848, 0.337105460562584, 1.80632996868884, 0.0708668133654222, 0.461907791978005  
"2366", "MALL", 34.8121997456212, 0.726215762026455, 0.402135994143609, 1.80589594714845, 0.0709345942910087, 0.46191050856319  
"2367", "AC105446.1", 11.0292700166744, -1.10607174455221, 0.612527119622723, -1.80575146653666, 0.0709571695448427, 0.46191050856319  
"2368", "ALOX5", 7.14336263051774, -1.48367930396551, 0.821803323073999, -1.80539462704499, 0.0710129513488543, 0.46191050856319  
"2369", "JRKL", 69.1290216494039, 0.438790509922381, 0.243073426356835, 1.80517679986224, 0.0710470201623954, 0.46191050856319  
"2370", "PDZRN4", 17.0224979965235, 1.42547463664743, 0.789577428935339, 1.80536396356914, 0.0710177463966785, 0.46191050856319  
"2371", "BCORL1", 64.3139437141692, 0.481147356817409, 0.266410262516309, 1.80603912279075, 0.0709122287500339, 0.46191050856319  
"2372", "KCNJ8", 94.232307876068, -0.561226509738297, 0.310996685619581, -1.80460608003007, 0.0711363459794226, 0.462296278782799  
"2373", "NOSTRIN", 48.2567050152409, 0.72218435457589, 0.400256118617524, 1.80430559580276, 0.0711834130437297, 0.462407211154274  
"2374", "NMI", 181.998573367106, -0.375587944471834, 0.208207144993603, -1.8039147719132, 0.0712446688678225, 0.462610181380575  
"2375", "MELTF", 86.4594836163673, 0.896972912175402, 0.497313119266672, 1.80363814551698, 0.0712880520450183, 0.462696977799561  
"2376", "CCDC8", 103.848515727883, 0.464352479481984, 0.257521690041435, 1.80315871415441, 0.0713632923050817, 0.462990383368196  
"2377", "ALG1L9P", 5.59289340573491, 1.33681304259888, 0.741650926839713, 1.80248280453885, 0.0714694777140475, 0.463289318318773  
"2378", "BCL2L1", 120.760023405385, 0.420948580740252, 0.233514325087164, 1.80266705515015, 0.0714405191115369, 0.463289318318773  
"2379", "NPR2", 81.9293162098581, 0.449798261752127, 0.249637010233464, 1.80180920021222, 0.0715754297466385, 0.46378110531502  
"2380", "HMG20B", 278.496162693372, -0.419548599742015, 0.23289034242233, -1.80148560639407, 0.0716263739537589, 0.463916199368569  
"2381", "SLC25A5", 553.887655305782, -0.42745808593299, 0.237349235306339, -1.80096677110117, 0.0717081175324922, 0.464250580329008  
"2382", "CLCN4", 40.0145570346426, 0.840226697667045, 0.466592663320887, 1.80077134451041, 0.0717389272080876, 0.464255064195076  
"2383", "SARDH", 5.6846690879842, 1.38454909586191, 0.769020658744459, 1.80040559394386, 0.0717966181878299, 0.464433432381619  
"2384", "GTPBP6", 237.195267458772, -0.471348463290608, 0.261831012162307, -1.80020105104442, 0.0718288979461203, 0.464447341375606  
"2385", "PGD", 270.647609053373, 0.4342866959861, 0.241302213058566, 1.79976259016197, 0.0718981333250531, 0.464638322058703  
"2386", "SRPRA", 266.996014220613, -0.323459130374072, 0.179736233315908, -1.7996322967643, 0.0719187179002313, 0.464638322058703

"2387", "FRMPD1", 14.0882706973778, 1.13332604778843, 0.629877722619001, 1.79927945867987, 0.0719744857312658, 0.464803811289259  
"2388", "KLHL36", 155.202629351324, 0.328139212136146, 0.182424340634124, 1.79876879913889, 0.0720552607603124, 0.46513058819942  
"2389", "PRF1", 9.48186298923476, 1.30419550403769, 0.725481064590275, 1.79769751092574, 0.0722249560907115, 0.466030848948647  
"2390", "TRAK1", 100.991312002401, 0.506926444234125, 0.282203317410966, 1.79631638949127, 0.0724442127309192, 0.467250016421389  
"2391", "TRIML2", 4.94049069736132, -4.178945798486, 2.32757836888407, -1.7954049815687, 0.0725891993556588, 0.467989338380376  
"2392", "MFSD6", 17.9386978803763, -0.945405719517371, 0.526955677665497, -1.79408963521501, 0.0727988631259511, 0.468557192102938  
"2393", "AC107294.2", 4.32035343514575, 1.69976149112189, 0.947384368442186, 1.79416248329794, 0.0727872383264205, 0.468557192102938  
"2394", "VPS35L", 116.29755898593, 0.325082120613492, 0.181143740015785, 1.79460863833972, 0.0727160758676974, 0.468557192102938  
"2395", "BRWD1", 221.351140699268, 0.375235738736946, 0.209112664789962, 1.79441899950843, 0.0727463166101418, 0.468557192102938  
"2396", "PPP1CB", 636.215535349079, -0.384134956697637, 0.214158528060404, -1.79369441962774, 0.0728619565005334, 0.468701784451419  
"2397", "EBP", 125.484020874835, -0.452450150151994, 0.252262605322164, -1.79356805410842, 0.0728821393013333, 0.468701784451419  
"2398", "SPATA6", 234.515570548812, 0.377446432487768, 0.210997218919085, 1.7888692297528, 0.073635878325839, 0.469173307626942  
"2399", "ACKR1", 3.68821706996496, -1.93087789044469, 1.07993933174119, -1.78795033544295, 0.0737840208867585, 0.469173307626942  
"2400", "LHX4", 2.67799588826126, 2.10587893301877, 1.17521135583326, 1.7919150649507, 0.0731465724011143, 0.469173307626942  
"2401", "B3GALNT2", 78.0422937749235, -0.35556100119081, 0.198444904587238, -1.79173661289198, 0.0731751667388894, 0.469173307626942  
"2402", "TMEM178A", 2.40515003977305, 2.18914897798196, 1.22448101096965, 1.78781782516039, 0.0738054040565295, 0.469173307626942  
"2403", "KCMF1", 221.839207059057, -0.311962986312615, 0.174350753089131, -1.78928384756178, 0.0735691140338729, 0.469173307626942  
"2404", "ST3GAL5", 567.184381128716, 0.433321384795319, 0.24218523364671, 1.78921471912458, 0.0735802420770187, 0.469173307626942  
"2405", "LRP1B", 82.5687440549901, 0.635630782623966, 0.355138519845081, 1.78981086844998, 0.0734843213737932, 0.469173307626942  
"2406", "FAP", 273.464452088097, -0.848962613058446, 0.474725905327447, -1.78832164735747, 0.0737241293055725, 0.469173307626942  
"2407", "KLF7", 294.227724738298, 0.388946382113124, 0.217577855474159, 1.78761933867538, 0.0738374432772269, 0.469173307626942  
"2408", "RPL14", 10843.3423930164, -0.423028432890073, 0.236644009700646, -1.7876152175802, 0.0738381086151775, 0.469173307626942  
"2409", "PDS5A", 202.293533763565, 0.355493893915115, 0.198455027723192, 1.79130706837503, 0.0732440324777886, 0.469173307626942  
"2410", "AP002026.1", 7.36264583362014, 1.07115925000316, 0.597646723667956, 1.79229502577894, 0.0730857196775145, 0.469173307626942  
"2411", "TMEM131L", 29.1742155192174, 0.564685126637538, 0.315297282940058, 1.79096096665347, 0.073299559003583, 0.469173307626942

"2412", "MTREX", 200.120631671916, 0.344747871565922, 0.192638685633842, 1.78960871972103, 0.073516835732106, 0.469173307626942  
"2413", "TUBB2B", 34.2508234117213, -0.932449286784754, 0.520846524005855, -1.79025729040725, 0.0734125588591051, 0.469173307626942  
"2414", "AC002429.2", 3.73253649498, 1.66206171004041, 0.928581055959473, 1.78989405326933, 0.0734709450320697, 0.469173307626942  
"2415", "TMEM176B", 2037.30788829426, 0.57598215859746, 0.321752088903293, 1.79014271689959, 0.073430971127947, 0.469173307626942  
"2416", "SLC52A2", 122.561234218138, -0.464764982882284, 0.259816286261283, -1.78882159224959, 0.0736435523798419, 0.469173307626942  
"2417", "ZNF37A", 215.428444820624, 0.440599523718339, 0.245874053761933, 1.79197242237259, 0.073137383652982, 0.469173307626942  
"2418", "BHLHE41", 111.545796022065, -0.94489840712926, 0.52763178170742, -1.79082921061268, 0.073320706215583, 0.469173307626942  
"2419", "AC022506.2", 2.9588328425487, -1.61368006299937, 0.90122431553391, -1.79054208279254, 0.0733668083198762, 0.469173307626942  
"2420", "MIA2", 82.9253176344918, -0.377454913479954, 0.210858129123861, -1.79008945516267, 0.0734395317173109, 0.469173307626942  
"2421", "EPG5", 68.9624361570873, 0.422696115265541, 0.236437062258878, 1.78777434987213, 0.0738124207627813, 0.469173307626942  
"2422", "AC007193.1", 3.27991964435348, 2.24329720900562, 1.25446117172879, 1.78825559496123, 0.0737347804661532, 0.469173307626942  
"2423", "AC008440.2", 7.51715234687589, -1.10112519391296, 0.615366558906775, -1.78938094372427, 0.0735534861727545, 0.469173307626942  
"2424", "ZNF8", 26.7026122360786, 0.67595503562335, 0.37758935097127, 1.79018564449605, 0.0734240721060743, 0.469173307626942  
"2425", "AL359555.4", 5.44094288273318, -1.29763779000609, 0.72385667301111, -1.79267227669279, 0.0730253419455712, 0.469173307626942  
"2426", "AC009509.1", 7.01891864882607, 5.77478563846671, 3.23033710374857, 1.78767275767148, 0.0738288193906188, 0.469173307626942  
"2427", "HGF", 53.5103561161235, -0.781348743732615, 0.437177863376019, -1.78725596419454, 0.0738961277932634, 0.469348500178474  
"2428", "FAM72D", 3.62882536831731, 1.85361190781605, 1.03820524260636, 1.78540025781671, 0.0741964168703155, 0.469708986176861  
"2429", "CCL20", 12.9452383817078, -1.19435453561916, 0.668484040729441, -1.78666125569115, 0.0739922547244589, 0.469708986176861  
"2430", "RING1", 160.860211835778, -0.327099310691963, 0.183154158033287, -1.78592347672781, 0.0741116491795755, 0.469708986176861  
"2431", "PHKG1", 62.5457471362651, -0.78624531231203, 0.440234645057223, -1.7859687353998, 0.0741043204572092, 0.469708986176861  
"2432", "CSRP2", 46.0160923188268, -0.874707687487794, 0.489974439846361, -1.78521085255401, 0.0742271223046923, 0.469708986176861  
"2433", "TM9SF1", 320.190162042866, -0.386384647107035, 0.216416107623782, -1.78537841452507, 0.0741999574659166, 0.469708986176861  
"2434", "ARL6IP1", 590.854100219659, 0.279000222637302, 0.15627507788956, 1.7853148845299, 0.0742102558755368, 0.469708986176861  
"2435", "KSR1", 41.5989356068484, 0.655627489118851, 0.367012879010476, 1.7863882348939, 0.074036419224244, 0.469708986176861  
"2436", "KIAA0355", 128.526822666605, 0.350189091625092, 0.196102778195874, 1.78574263376989, 0.0741409389352323, 0.469708986176861

"2437", "B3GNT9", 62.5527897034134, 0.654230001820671, 0.366602063988831, 1.78457806457032, 0.0743297820418575, 0.470165609427671  
"2438", "CHRA1", 187.029644595738, -0.313444669739179, 0.175755272716397, -1.78341545544958, 0.0745186991902727, 0.470395474208867  
"2439", "KIF5B", 658.826419351353, -0.319051864484452, 0.17888751044237, -1.78353348255265, 0.074499502606342, 0.470395474208867  
"2440", "DRC3", 23.7950271234269, -0.646223152327171, 0.362309555660615, -1.78362160818222, 0.0744851719990064, 0.470395474208867  
"2441", "PNPLA6", 47.3973185500111, -0.430819969073413, 0.241564224285241, -1.78345932783779, 0.0745115630693932, 0.470395474208867  
"2442", "RPA4", 11.6915233260544, -0.787742825637169, 0.441571990629221, -1.78395107106922, 0.0744316161231277, 0.470395474208867  
"2443", "SELENBP1", 579.44971448065, 0.413378848390343, 0.231916967693596, 1.78244331366255, 0.0746769675075401, 0.470623652546497  
"2444", "ANAPC15", 58.0614308829357, -0.587920102305696, 0.329803437596957, -1.78263788452131, 0.0746452686840536, 0.470623652546497  
"2445", "SENP8", 8.89865537926132, 1.02391698472595, 0.574401757030962, 1.78257982708565, 0.0746547260534865, 0.470623652546497  
"2446", "BTG3", 210.877656127984, -0.406642980974068, 0.228100771262833, -1.782733915027, 0.0746296277720115, 0.470623652546497  
"2447", "VWA1", 60.5478942994361, 0.65902076648819, 0.369915743985869, 1.78154289781558, 0.0748238034190675, 0.470738962553177  
"2448", "VDAC1", 539.237719689719, -0.383188646010733, 0.215151116734135, -1.7810209485654, 0.0749090285528993, 0.470738962553177  
"2449", "ZNF397", 143.916908276186, 0.456476522251172, 0.256280086823129, 1.78116266429318, 0.0748858810300189, 0.470738962553177  
"2450", "PBX4", 18.2151720086064, -0.703773180521126, 0.395116622209478, -1.78117836851725, 0.0748833162975608, 0.470738962553177  
"2451", "TCEANC", 10.9939320422682, 0.841870033770199, 0.472444962077004, 1.78194308617261, 0.0747585133498096, 0.470738962553177  
"2452", "GEMIN8", 76.8818300282422, -0.496182213830449, 0.278453829592407, -1.78191915893829, 0.0747624157301324, 0.470738962553177  
"2453", "CA5B", 119.428834330508, -0.628667965575794, 0.352976881172573, -1.78104572596196, 0.0749049810481421, 0.470738962553177  
"2454", "ADCY6", 64.0873364343291, 0.394756594605989, 0.221729542738679, 1.7803518183918, 0.0750184016897771, 0.470850432429932  
"2455", "ZNF664", 102.327197746638, 0.382025571605045, 0.21455063783211, 1.78058464642733, 0.0749803298374471, 0.470850432429932  
"2456", "FAM110A", 7.89655831065341, -0.976508883717144, 0.548457951933628, -1.78046262302222, 0.0750002810378732, 0.470850432429932  
"2457", "ZNF500", 43.1013669712787, 0.581052826116187, 0.326628782201769, 1.77893944985305, 0.0752496895134224, 0.472109875396584  
"2458", "LINC02289", 5.13637041605978, 1.300323573885, 0.731149738138531, 1.77846411761776, 0.0753276601773345, 0.472406786669492  
"2459", "AC093627.6", 13.3536291002258, -2.69246504230131, 1.51440186720096, -1.77790657857398, 0.0754191995922678, 0.472788516354131  
"2460", "NNMT", 5170.43906940938, -0.46362546858986, 0.260800112935386, -1.77770424779196, 0.0754524416708409, 0.472804629413014  
"2461", "TRIM61", 9.19600236752518, 1.29753796115354, 0.730439696832619, 1.77637930520482, 0.0756704197436989, 0.472825099452419

"2462", "ERGIC1", 537.768884238599, 0.281111739464971, 0.158211539202636, 1.77680933313547, 0.0755996157690589, 0.472825099452419  
"2463", "AC004854.2", 5.92722999537616, -1.03019853838553, 0.579903950664409, -1.77649856878058, 0.0756507776094321, 0.472825099452419  
"2464", "UBE2H", 415.000999354817, 0.339753357598991, 0.191178862576018, 1.77714917340245, 0.0755436994243875, 0.472825099452419  
"2465", "AC139019.1", 3.66914822780212, 1.5507422564667, 0.872543417539845, 1.77726658100184, 0.0755243893612674, 0.472825099452419  
"2466", "POLR3K", 79.8946041815234, -0.528598087890501, 0.297524425415048, -1.77665442813008, 0.0756251146004242, 0.472825099452419  
"2467", "MORC2-  
AS1", 14.892574268056, -0.686297991346774, 0.386317308082235, -1.77651370256671, 0.0756482854455597, 0.472825099452419  
"2468", "ADORA2B", 6.02780050734155, -1.27572592692179, 0.718482961519188, -1.77558271420153, 0.075801721191471, 0.473453619192272  
"2469", "SLC36A4", 79.5271265530613, -0.395510323663161, 0.222788864903963, -1.77526971033158, 0.0758533642138969, 0.473584288925565  
"2470", "IQCH-  
AS1", 59.803248263203, 0.656190444142393, 0.369768369071271, 1.77459863803525, 0.0759641822898852, 0.474084157894162  
"2471", "VAV3", 2.8968406439667, -1.61498417423245, 0.910718242217641, -1.77330825206695, 0.0761776424126356, 0.474135865796456  
"2472", "DEGS1", 355.964721298495, -0.368344329594998, 0.207699394084006, -1.7734492255958, 0.0761542983025499, 0.474135865796456  
"2473", "C2orf68", 114.593336476931, 0.432220602256166, 0.243745278187236, 1.77324707773067, 0.0761877742184768, 0.474135865796456  
"2474", "AC116351.2", 3.39398198897427, 1.71545069211165, 0.967155153013708, 1.77370785521455, 0.0761114864399119, 0.474135865796456  
"2475", "RNF170", 157.127551218031, 0.326610951118654, 0.184171193850692, 1.7734095343023, 0.0761608702790288, 0.474135865796456  
"2476", "AL138756.1", 5.02545442651037, 1.34055620990555, 0.755950608655183, 1.77333835644417, 0.0761726568739424, 0.474135865796456  
"2477", "YES1", 202.956619706414, 0.302430077421781, 0.170506085706341, 1.77372013537775, 0.0761094541500034, 0.474135865796456  
"2478", "WDR82", 303.723348639126, 0.294544633115472, 0.166177818666261, 1.77246659920968, 0.0763171349974392, 0.474557739405214  
"2479", "TLE1", 36.0149672208805, 0.731250550404135, 0.412528436123205, 1.77260641054509, 0.0762939487405407, 0.474557739405214  
"2480", "STAT6", 288.73140977215, 0.360055378050594, 0.203242738095677, 1.77155347061452, 0.0764687092558664, 0.475308529507734  
"2481", "AC010883.3", 7.76075690444303, 1.5075190422195, 0.851069972494008, 1.77132208977108, 0.0765071561445203, 0.475355829088182  
"2482", "OVGP1", 2.75973285465796, -1.65082893626438, 0.93210423871856, -1.77107759807413, 0.0765477986949594, 0.47541672718888  
"2483", "DNAJC4", 230.702714148215, -0.515109454383597, 0.290932848594921, -1.77054415433442, 0.0766365356740514, 0.475734671161622  
"2484", "RHN01", 28.2496403764538, 0.595982912197599, 0.336637645154045, 1.77039888668683, 0.0766607150934459, 0.475734671161622  
"2485", "TRMT10A", 53.0290315827196, 0.400917444121936, 0.226513130838852, 1.76995233184588, 0.0767350819256047, 0.475842604916135

"2486", "CACNB1", 17.5916765890286, -0.701113000025834, 0.3961675707374, -1.76973849404389, 0.0767707141372966, 0.475842604916135  
"2487", "CALR", 1580.69125696324, -0.385320830725939, 0.217715216318519, -1.76983877030539, 0.0767540032283097, 0.475842604916135  
"2488", "MBD5", 133.369883426431, 0.400873237831194, 0.226604093477326, 1.76904676204053, 0.0768860711936288, 0.475889406068652  
"2489", "CLOCK", 138.818199680975, 0.397375433933785, 0.224573801530581, 1.76946478719012, 0.076816342126553, 0.475889406068652  
"2490", "SGPL1", 58.3461124062262, 0.42193099579496, 0.238519134757103, 1.76896078473803, 0.0769004191111317, 0.475889406068652  
"2491", "SMIM10L2A", 2.93428135830948, 1.82354576595762, 1.03086174435006, 1.7689527969702, 0.0769017522229654, 0.475889406068652  
"2492", "BICC1", 588.311178850137, 0.506869159971286, 0.286602638109268, 1.76854324620013, 0.0769701291030153, 0.476121404543732  
"2493", "UBE2QL1", 4.40168348734898, 1.63888611095967, 0.927267980914425, 1.76743524492616, 0.0771553647509221, 0.476502382866773  
"2494", "GALNT10", 141.938028769559, 0.580989255681548, 0.328634843104987, 1.76788696594762, 0.0770798022187823, 0.476502382866773  
"2495", "QKI", 829.568507428826, 0.288145286230474, 0.163018898118142, 1.76755756269221, 0.0771348978461895, 0.476502382866773  
"2496", "AL138820.1", 3.39265721730191, 1.78657997338404, 1.01069160673172, 1.76768062728978, 0.0771143104425038, 0.476502382866773  
"2497", "CENPK", 5.27849743562959, -1.11538973856558, 0.631274912796453, -1.76688430976065, 0.0772476052208102, 0.476880990980693  
"2498", "AC073349.1", 14.6590307304833, -0.771027342871559, 0.436478749337386, -1.76647166452444, 0.0773167512987857, 0.476925858851853  
"2499", "EXD3", 35.6860762503177, 0.549398372759222, 0.311001277065774, 1.76654699923637, 0.0773041238610012, 0.476925858851853  
"2500", "HS2ST1", 93.2187503041676, 0.369641686768004, 0.209285677828652, 1.76620631952962, 0.0773612412248407, 0.47693627805283  
"2501", "KMT2C", 449.050092565083, 0.496907873357894, 0.281448178152921, 1.76553949156461, 0.0774731391660256, 0.47693627805283  
"2502", "PPP2R2D", 144.33085248574, -0.307852288109672, 0.174327207276268, -1.76594516093979, 0.0774050495880462, 0.47693627805283  
"2503", "RELB", 50.7275557908653, -0.476266364524675, 0.269727727349177, -1.76573009087836, 0.0774411419489293, 0.47693627805283  
"2504", "MRTFA", 108.829013120469, 0.394140035910894, 0.223227066549533, 1.76564626325651, 0.077455213341605, 0.47693627805283  
"2505", "LINC02384", 91.2827600856479, 0.673923295945254, 0.38186799907175, 1.76480694266981, 0.0775962174417166, 0.477503270205214  
"2506", "CFLAR", 646.491154862516, 0.433831913884411, 0.245883841187399, 1.76437748731023, 0.0776684458634492, 0.477639904369255  
"2507", "CRYGS", 3.80845911478988, 1.48541362252139, 0.841924932356047, 1.76430649032403, 0.0776803918426027, 0.477639904369255  
"2508", "VRK3", 89.1770818141316, 0.366608517955336, 0.207815851323564, 1.76410276511841, 0.0777146790293891, 0.477660198260779  
"2509", "MBOAT1", 123.584261693577, -0.451971093411406, 0.256253905956897, -1.76376274821516, 0.0777719317180193, 0.477821573309393  
"2510", "LINC01303", 6.8125058819726, -1.34141648607163, 0.760839494399276, -1.76307420414703, 0.0778879752794374, 0.4783438800528

"2511", "CSF2", 3.42847361724786, -2.51388526016811, 1.42651032751153, -1.76226222249189, 0.078025003492286, 0.478803912752225  
"2512", "CKAP5", 120.187757712792, 0.315880682064319, 0.179229085156516, 1.76244096647857, 0.0779948222197033, 0.478803912752225  
"2513", "CEP63", 186.381713384618, -0.344018776660981, 0.195292979830593, -1.7615521917859, 0.0781449874928495, 0.47896818377824  
"2514", "PIM1", 339.31858070288, -1.30751309256369, 0.742174537591957, -1.76173261993872, 0.0781144837521986, 0.47896818377824  
"2515", "TBXAS1", 4.44140325357043, -1.26297276780256, 0.716964202930816, -1.76155624317053, 0.0781443024468401, 0.47896818377824  
"2516", "SIPA1L2", 175.461907662294, 0.532144784640968, 0.302184606215143, 1.76099236591192, 0.0782396951118224, 0.479108701477686  
"2517", "AC007364.1", 11.7123353668426, 0.8896591695234, 0.505339614828654, 1.76051736973967, 0.0783201250570884, 0.479108701477686  
"2518", "TCTA", 82.0272847452272, 0.519029429692218, 0.294827501832203, 1.76045120101318, 0.0783313345850773, 0.479108701477686  
"2519", "PCNP", 558.186188215597, -0.253514176899163, 0.144011260041799, -1.76037746510641, 0.0783438275942065, 0.479108701477686  
"2520", "TM4SF1", 8.50349586711716, -1.4940821740503, 0.848880226847932, -1.76006240550347, 0.078397226133008, 0.479108701477686  
"2521", "THAP6", 67.2443577573366, 0.395959055000643, 0.224966617639422, 1.76007915821221, 0.0783943860194684, 0.479108701477686  
"2522", "R3HCC1", 212.463354176652, -0.43863455783101, 0.249063696443242, -1.76113405564495, 0.0782157161580054, 0.479108701477686  
"2523", "AC011462.5", 7.13383842982936, 1.41337302858665, 0.803076409702028, 1.7599483828831, 0.0784165587952125, 0.479108701477686  
"2524", "GMPPA", 115.528895069606, -0.411695403579365, 0.23396550240284, -1.75964148283071, 0.0784686133180336, 0.47915684141953  
"2525", "MAOB", 42.3927621788842, -0.47423560650472, 0.269523190441502, -1.75953544378828, 0.0784866055520152, 0.47915684141953  
"2526", "TBC1D9", 106.612902871093, 0.389966313625834, 0.221753549382819, 1.75855725742015, 0.0786527382594583, 0.4799809818961  
"2527", "TNFRSF25", 2.66193795559974, -1.61452740647283, 0.918709078690142, -1.75738701611042, 0.0788518648994074, 0.480815465753309  
"2528", "AL353150.1", 5.40998979821467, 1.39683579066626, 0.794769734544662, 1.7575352079386, 0.0788266261259835, 0.480815465753309  
"2529", "MCC", 122.80250223406, 0.528041456185476, 0.300555490968251, 1.75688507464751, 0.0789374001546893, 0.48095653098203  
"2530", "TRIR", 1297.27163391692, -0.394474227107866, 0.224520871534608, -1.75696016326509, 0.0789245995925501, 0.48095653098203  
"2531", "CD164", 1136.63583512112, 0.246135038622136, 0.140156484827041, 1.75614449039498, 0.0790637400692909, 0.481535975175077  
"2532", "SEPSECS", 29.3286520450156, 0.531674720531749, 0.302804714141158, 1.75583369644602, 0.0791168089102482, 0.481668882050346  
"2533", "SLC39A1", 527.915912316161, -0.384849140822466, 0.219271765744143, -1.75512401022723, 0.0792380982120382, 0.481924959538081  
"2534", "ATF2", 165.609700880097, 0.31246856546556, 0.178096443767789, 1.7544907627295, 0.0793464513336134, 0.481924959538081  
"2535", "JRK", 23.0078716725383, 0.784518432112006, 0.447080468840631, 1.75475890088963, 0.0793005563017044, 0.481924959538081

"2536", "MFAP5", 16526.9573531606, 0.548417616199929, 0.312577568779269, 1.75450086946962, 0.0793447210533399, 0.481924959538081  
"2537", "ABAT", 17.2214106545981, 0.811995015529446, 0.462717003519664, 1.75484153241181, 0.0792864172869534, 0.481924959538081  
"2538", "CD37", 16.9472076633113, -0.708351951402382, 0.403644285600836, -1.75489156336743, 0.0792778575259163, 0.481924959538081  
"2539", "RUNX3", 13.476863798532, 1.16765890674987, 0.665783323738456, 1.75381218651335, 0.0794626942132989, 0.482250957203938  
"2540", "ENTR1", 93.8275048402677, -0.345431491653786, 0.196958445240917, -1.7538292975011, 0.0794597613303959, 0.482250957203938  
"2541", "AL356055.1", 5.73738104374508, -1.2372794671613, 0.70595936367111, -1.75262137005625, 0.0796670206067798, 0.483300717297722  
"2542", "SVBP", 568.565198633127, 0.470370683170117, 0.268458760715497, 1.75211522960354, 0.0797539960263997, 0.483447836707413  
"2543", "BMP5", 30.5929434349083, 1.25447730776681, 0.715972014972818, 1.75213176148293, 0.0797511539614685, 0.483447836707413  
"2544", "PRIMPOL", 57.2164064982437, 0.395070835139048, 0.225592843401642, 1.75125606460693, 0.079901812046236, 0.484153471970412  
"2545", "HLTF", 163.941069079928, 0.302502848365933, 0.172856698023697, 1.75002098168312, 0.0801146933073743, 0.48483304497996  
"2546", "KCNJ5", 3.63507720184745, -1.43074853666664, 0.817531032339148, -1.75008468189022, 0.0801037025574348, 0.48483304497996  
"2547", "PHKG2", 47.6037593732654, -0.492754016598557, 0.281560396391552, -1.75008283449533, 0.0801040212872668, 0.48483304497996  
"2548", "LMNB2", 48.3270682681292, -0.500763953610054, 0.286200965194294, -1.74969344799413, 0.0801712248883502, 0.48483304497996  
"2549", "YIPF2", 213.632055220104, -0.381256064465512, 0.217889461088474, -1.74976826580292, 0.0801583086468035, 0.48483304497996  
"2550", "SETD7", 481.585701142907, 0.315721298586955, 0.180501010705066, 1.74913867436917, 0.0802670515109244, 0.485222195702313  
"2551", "MMADHC", 258.896403758328, -0.318678255532804, 0.182229588746309, -1.74877338924608, 0.0803301983798476, 0.485413566454469  
"2552", "OSR2", 1298.18337281448, 0.644317664984429, 0.368493077036529, 1.74852040685843, 0.0803739551145968, 0.485487663828962  
"2553", "TOE1", 35.1765924325803, -0.543709701624324, 0.311143743648151, -1.74745503557084, 0.0805584380285778, 0.485587455108655  
"2554", "RPL5", 10445.0483393804, -0.460204781828986, 0.263484980382056, -1.74660726832203, 0.080705485565253, 0.485587455108655  
"2555", "RBM47", 32.8310863961485, -0.657280238685431, 0.376217570471369, -1.7470748053099, 0.0806243630678315, 0.485587455108655  
"2556", "CDK19", 84.8898939359072, 0.409906427869366, 0.234583364567334, 1.74738063214925, 0.0805713347875149, 0.485587455108655  
"2557", "FAM66C", 24.0391043237165, 0.603367905172397, 0.345446109692569, 1.74663395604416, 0.0807008531866173, 0.485587455108655  
"2558", "AC093525.6", 9.824310250673, 0.93040074849642, 0.532619355863255, 1.74683991156959, 0.0806651112768786, 0.485587455108655  
"2559", "CBX1", 349.547793415064, 0.258636572609477, 0.147973723424008, 1.74785473139966, 0.0804891852204358, 0.485587455108655  
"2560", "HSPA12B", 143.52661244931, 0.456700706254268, 0.261345778402287, 1.74749601484388, 0.0805513355792863, 0.485587455108655



"2561", "TRIOBP", 1074.06861514881, 0.330803196063508, 0.189393054937143, 1.74664903194733, 0.080698236449817, 0.485587455108655  
"2562", "RAB33A", 10.2976341058278, -1.06066218741513, 0.607004168030643, -1.74737216526261, 0.0805728025063386, 0.485587455108655  
"2563", "STXBP3", 207.959451444006, -0.352175165194197, 0.201684904727797, -1.74616521583263, 0.0807822471902003, 0.48585967242955  
"2564", "CCDC167", 119.094278439359, -0.522991689219311, 0.299571374237713, -1.74579994684109, 0.0808457202218253, 0.486051785186988  
"2565", "FBXW5", 329.345952637053, -0.297129306993529, 0.170264999227072, -1.74509915920691, 0.080967609918766, 0.486594817504007  
"2566", "TNRC6A", 535.206486172786, 0.372043260247118, 0.213216399214088, 1.74490921720122, 0.0810006726807782, 0.48660380723858  
"2567", "MYLPF", 4.87405514692746, -1.43176203278388, 0.820782048674501, -1.74438760581578, 0.0810915247407428, 0.486959818417822  
"2568", "GALNS", 70.357146473201, 0.50991536917663, 0.292604248102572, 1.74267930996641, 0.0813896476978857, 0.488559742703625  
"2569", "MAP3K2-DT", 13.3491782477924, -0.791878608181536, 0.454496171976186, -1.74232184341264, 0.0814521433088805, 0.488690280778266  
"2570", "AC022966.1", 8.21363388807799, 1.10326346435022, 0.63332745730099, 1.7420111059955, 0.0815065009329174, 0.488690280778266  
"2571", "ZBTB33", 46.9716988098724, 0.424251217710025, 0.243522261853766, 1.74214552082629, 0.0814829839933538, 0.488690280778266  
"2572", "DNMT3A", 69.8518183010329, 0.444265758582622, 0.255251422868699, 1.74050257424481, 0.0817708084478706, 0.488754173022073  
"2573", "SMC2", 116.032768239666, -0.288523749616428, 0.165723273828832, -1.74099716322544, 0.0816840757725494, 0.488754173022073  
"2574", "VPS26B", 156.610388158515, 0.320959878233723, 0.184312873609089, 1.74138611128407, 0.081615921059642, 0.488754173022073  
"2575", "TMED2", 855.003710938762, -0.286061578189882, 0.164305309239846, -1.74103672920454, 0.0816771405837378, 0.488754173022073  
"2576", "FAM161B", 30.7325511463988, 0.624720295306318, 0.358859865905055, 1.74084748577486, 0.0817103158004835, 0.488754173022073  
"2577", "MEX3D", 133.283384391963, -0.39190116188695, 0.22503093559004, -1.74154349427277, 0.0815883562189383, 0.488754173022073  
"2578", "ARSA", 169.484098867709, 0.496497668392435, 0.285069401039376, 1.74167296308261, 0.0815656860698905, 0.488754173022073  
"2579", "BGN", 377.738971301561, -1.26467036052667, 0.726585897825896, -1.74056551924671, 0.0817597660675858, 0.488754173022073  
"2580", "ACOT7", 21.8331844921937, -0.850708017951082, 0.48930766478858, -1.73859532390251, 0.0821059696289844, 0.489040454712012  
"2581", "AKR1A1", 525.650084665755, -0.457373363647298, 0.263093092613326, -1.73844687104541, 0.0821321039202409, 0.489040454712012  
"2582", "FLAD1", 42.5399371492829, -0.441663786691739, 0.253867879855738, -1.73973874498309, 0.0819049027133588, 0.489040454712012  
"2583", "SPSB4", 68.5039987165889, 0.733007068851712, 0.421693795756648, 1.73824485023896, 0.0821676793839838, 0.489040454712012  
"2584", "DRAP1", 676.816654177887, -0.446681597588238, 0.256714127711618, -1.73999616448854, 0.0818596914455312, 0.489040454712012  
"2585", "IGDCC4", 103.16675771258, 0.621595891574579, 0.357570873284838, 1.

73838513708979,0.0821429738219628,0.489040454712012  
"2586","STAP2",13.2724401654802,-0.879202510798135,0.505571688993703,-  
1.73902639316713,0.0820301205285354,0.489040454712012  
"2587","SLC25A23",77.2580812028077,0.366945151005454,0.211000011875563  
,1.73907644717034,0.0820213169242702,0.489040454712012  
"2588","CDS2",119.081198955522,0.340408686418498,0.195698703870628,1.7  
3945294315048,0.0819551225691205,0.489040454712012  
"2589","PQBP1",207.8492230931,-0.406370508406383,0.233699565514854,-1.  
73885863891584,0.0820596310904785,0.489040454712012  
"2590","RTL8B",72.6683335728656,-0.375646845629276,0.216053310605269,-  
1.73867664687437,0.0820916560361094,0.489040454712012  
"2591","BTG2",1710.30862641533,0.302760053645696,0.174215760260977,1.7  
3784537743404,0.0822380625377909,0.489081687507734  
"2592","CDK12",231.236026826681,0.353580265746769,0.203450269168497,1.  
73791987197586,0.0822249336300372,0.489081687507734  
"2593","FAM126B",103.319280669322,0.414894513235099,0.238796812066103,  
1.73743740398112,0.0823099938715324,0.489132056873428  
"2594","ZNF776",13.5732512875229,0.788516541606909,0.453793481282094,1.  
.73761099295461,0.0822793815141585,0.489132056873428  
"2595","MAFIP",3.39071673853996,1.71943881343524,0.989806276728802,1.7  
3714680727,0.0823612611733696,0.489248108280344  
"2596","PARP8",42.4653985284198,0.585864766834829,0.337322377046703,1.  
73680967140142,0.0824207713881563,0.489312494923129  
"2597","OLR1",6.92836541853721,-1.47969233553228,0.852001135882973,-1.  
73672577795192,0.0824355854242858,0.489312494923129  
"2598","UBXN8",44.2656707779217,0.476307406548793,0.274319367375038,1.  
73632438389815,0.0825064940867775,0.489544883120737  
"2599","ZDHHC11",10.0816459896601,-1.52736478122593,0.879952656524925,  
-1.73573517836487,0.0826106703238017,0.489785955015924  
"2600","PPP1R15A",2039.83912725432,-0.259050226626949,0.14923233525439  
3,-1.73588536415618,0.0825841061585439,0.489785955015924  
"2601","NUDC",648.528769214456,-0.375723265171546,0.216562289550254,-1.  
.73494317016979,0.0827508716472305,0.489919314555978  
"2602","LRRC8C",57.0882287291282,0.4703726768151,0.271125361346092,1.7  
3488999509223,0.0827602916058233,0.489919314555978  
"2603","AC005828.5",5.86838575347614,1.44155087354095,0.83082202368822  
3,1.73508986574712,0.0827248890486814,0.489919314555978  
"2604","APCDD1L",25.4051617280676,1.06780816736239,0.615467937758724,1.  
.73495336126022,0.0827490663960208,0.489919314555978  
"2605","KIT",9.11416063676156,1.08546101734689,0.625991373857556,1.733  
98718045896,0.0829203577869497,0.49044297046152  
"2606","PTPN12",404.955272993229,0.289267937902355,0.166841630731718,1.  
.73378752433497,0.0829557900390608,0.49044297046152  
"2607","AC005670.3",92.6664382827161,0.443045331272166,0.2555529099335  
7,1.73367359184967,0.0829760147235578,0.49044297046152  
"2608","PPP1R9B",93.616711367415,-0.351279758178734,0.202597072715461,  
-1.73388368089648,0.0829387239497763,0.49044297046152  
"2609","ARL9",4.93186824762916,-1.30144311788125,0.751228475970846,-1.  
7324198423114,0.0831988376240567,0.491194975861675  
"2610","FILIP1",488.295384556676,0.327663702030566,0.189115958680369,1

.73260736067421,0.083165480087311,0.491194975861675  
"2611","TMUB1",90.7242153301469,-0.518898266977247,0.299520005178993,-  
1.73243275242051,0.0831965407045836,0.491194975861675  
"2612","PLA2G4A",40.2353284129313,0.586918648730894,0.338922186942943,  
1.73172094168536,0.0833232601614777,0.491378996042415  
"2613","SLC26A2",133.722208370279,0.423359052674754,0.244474906197949,  
1.73170759837398,0.0833256370843252,0.491378996042415  
"2614","RAB4B",57.0057168440701,-0.440267423683363,0.254187454604871,-  
1.73205803711969,0.0832632295794247,0.491378996042415  
"2615","ZC3H12C",45.0385884442407,0.566706943743748,0.32745317932055,1  
.73065030218866,0.0835141541658985,0.492302365761883  
"2616","FIBIN",281.697041454193,-0.656478853054538,0.379376712815543,-  
1.73041420540149,0.0835562976273766,0.492315952770894  
"2617","HECTD4",102.307257845706,0.503510546611214,0.290999529224036,1  
.73027959170192,0.0835803339864697,0.492315952770894  
"2618","KIF13B",106.853959828639,-0.640092473438481,0.370103407081022,  
-1.72949630074157,0.0837203079973597,0.492952080893545  
"2619","RNF5",202.365113961094,-0.348761177349338,0.201711914093939,-1  
.72900633517818,0.0838079612497087,0.493279771922207  
"2620","ERMP1",19.5634256128523,0.627589721909548,0.363110842679487,1.  
72836954489821,0.0839219919889476,0.493285261827195  
"2621","TNFAIP2",1146.37422213862,0.515009921470159,0.298033450655188,  
1.72802724102941,0.0839833406080367,0.493285261827195  
"2622","HSD11B1L",47.9795500387817,-0.576529498630394,0.33361645097176  
5,-1.72812071152686,0.0839665849722658,0.493285261827195  
"2623","ICAM1",193.335342452794,-0.684897552938324,0.3963689619513,-1.  
7279293251586,0.0840008960296066,0.493285261827195  
"2624","PSMC4",272.714486695289,-0.484560985829982,0.280387730658828,-  
1.72818184551587,0.0839556274824553,0.493285261827195  
"2625","XBP1",550.087762253212,-0.438123288110219,0.253476148807898,-1  
.72845962103622,0.0839058543324589,0.493285261827195  
"2626","AL109615.2",3.3651315070259,-1.57285213853786,0.91044606895186  
6,-1.72756211726916,0.0840667595128299,0.493393166479662  
"2627","EEF1D",3846.71085930625,-0.398720449050069,0.230883276087346,-  
1.72693516744465,0.0841793076770361,0.493393166479662  
"2628","AP003120.1",3.21848427122535,1.97551676601848,1.14385437347475  
,1.72707016892136,0.0841550623170598,0.493393166479662  
"2629","CORO6",15.9563703414977,0.801157996085068,0.463892447535797,1.  
72703392853414,0.0841615702925535,0.493393166479662  
"2630","AC008969.1",21.0905989336181,0.580335189195481,0.3360307073331  
87,1.72703022828225,0.0841622347992284,0.493393166479662  
"2631","UPF1",147.863447269101,0.360919330629021,0.209024226222873,1.7  
2668660064403,0.0842239633950708,0.493467273179406  
"2632","PRELID1",662.727317713243,-0.431047537061153,0.249682421743657  
, -1.72638319530439,0.0842784969906325,0.493599175953875  
"2633","TUBE1",91.8599603375278,0.336512726288411,0.194987227290744,1.  
72581933167673,0.0843799208451362,0.493630542629137  
"2634","MESP2",8.85715411255047,1.17920980854913,0.683145509174117,1.7  
261473474,0.084320907656443,0.493630542629137  
"2635","ZNF75A",52.7722487359034,0.488200404988466,0.282851348985058,1

.7259963819874,0.0843480636387026,0.493630542629137  
"2636","GNB4",252.208905315832,0.423685641677298,0.245684569972203,1.7  
2451058576953,0.0846157096137324,0.494159944999686  
"2637","WDR37",35.2610588816314,0.538467813408863,0.312200760351663,1.  
72474856500136,0.0845727947399304,0.494159944999686  
"2638","RTRAF",844.501422284657,-0.429147591071834,0.248889454345593,-  
1.72424979676296,0.0846627580112988,0.494159944999686  
"2639","PRPSAP2",58.1531788775492,-0.45323283886195,0.262804599962643,  
-1.72460009804385,0.084599565769038,0.494159944999686  
"2640","ZNF708",107.660988649828,0.406724006768525,0.235806738611044,1.  
.72481927006931,0.0845600478652369,0.494159944999686  
"2641","MSN",532.38872790084,-0.353306567769848,0.204902112212897,-1.7  
2427001339428,0.0846591100147162,0.494159944999686  
"2642","DCLK1",1550.56697097932,0.3664925150728,0.212626601446418,1.72  
364376131533,0.0847721733303254,0.494611298973113  
"2643","CMSS1",136.19264058396,-0.43159393497529,0.250455492868863,-1.  
72323605296718,0.0848458464635305,0.494853849124224  
"2644","TBX15",252.055493823292,-0.343983428667052,0.19969380791686,-1.  
.72255430579131,0.0849691542631166,0.495052358004322  
"2645","ARL6IP5",2413.44174107042,-0.306695865211106,0.178051178045584  
, -1.7225152261143,0.0849762270048288,0.495052358004322  
"2646","CIB2",34.9126628337173,-0.529449245932282,0.30734628817935,-1.  
72264727538641,0.084952330297219,0.495052358004322  
"2647","MAPK14",188.377348773678,0.36504764606646,0.211987758720441,1.  
72202229161669,0.0850654804595886,0.495385108154348  
"2648","AMMECR1L",54.5700628335691,0.488898889812059,0.284037198400209  
, 1.72124951437945,0.0852055563615453,0.495952455219616  
"2649","AC011379.2",22.5513433280849,0.943726166465136,0.5483430003539  
92,1.72105081282317,0.0852416037237131,0.495952455219616  
"2650","SLC8B1",102.852627338326,0.411964518202663,0.239381674400013,1.  
.72095261358336,0.085259423051053,0.495952455219616  
"2651","PRICKLE1",219.263920650159,0.424437165409528,0.246700147778962  
, 1.72045768610489,0.0853492789086979,0.496287866607913  
"2652","TRIB3",6.59248398393275,1.43182087978807,0.832440027806902,1.7  
2002886929916,0.0854271940261695,0.496553618368553  
"2653","EGOT",3.33913946161649,-1.84566870459247,1.07322112737638,-1.7  
1974689792441,0.0854784589640081,0.496664321496489  
"2654","CPLANE1",130.786841910254,0.498944569198085,0.290235688877869,  
1.71910136595242,0.0855959161330363,0.496972145834559  
"2655","UBTD2",227.991790934206,0.333448632270539,0.193948573877437,1.  
71926313044847,0.085566470182497,0.496972145834559  
"2656","DDX19A",92.7536994449209,0.370404375369212,0.21559237759312,1.  
71807732492409,0.0857825121485529,0.497868006313984  
"2657","GABPB2",140.244763486396,0.478464770522926,0.278523491960663,1.  
.71786145274418,0.0858218892991303,0.497881627529378  
"2658","CEP70",28.5398697417315,-0.482416322356416,0.280848465219775,-  
1.71771037445017,0.0858494561124285,0.497881627529378  
"2659","GSAP",17.8943585091662,-0.789467844342799,0.459657194044725,-1.  
.71751438805064,0.0858852278372211,0.497901762734397  
"2660","TRPV2",107.987630576161,-0.34391434413816,0.200261149992877,-1

.71732931799499,0.085919018150502,0.497910400296988  
"2661","CLEC7A",14.4369388484015,-1.15413502687284,0.672501994294739,-  
1.71618082424156,0.0861289517631501,0.498751987764447  
"2662","LRRC37A3",13.4708241047395,0.852589932537278,0.496767211346011  
,1.71627658401035,0.0861114319781735,0.498751987764447  
"2663","TRBC2",22.6520663820303,0.909227007928546,0.529922110600092,1.  
71577480867693,0.0862032665704677,0.498774724586898  
"2664","CTNND1",235.694344122921,0.281975189053072,0.164373653773263,1.  
71545246199873,0.0862623039733162,0.498774724586898  
"2665","COX5A",430.078966357234,-0.464249158386679,0.270601211762745,-  
1.71562113621915,0.086231407422308,0.498774724586898  
"2666","APOE",848.778972382636,-1.42480528241954,0.83053600528541,-1.7  
1552500235064,0.0862490154488894,0.498774724586898  
"2667","NSMCE4A",182.575326889583,-0.416112486495833,0.242637866134808  
, -1.71495279415556,0.0863538820773237,0.499117019955735  
"2668","MRPL3",286.571255814628,-0.396624887873527,0.231347400114329,-  
1.71441255738132,0.0864529839012354,0.499502528799679  
"2669","ZNF618",122.627383328442,0.424201890910556,0.247504957877793,1.  
.7139127011751,0.0865447600436451,0.499658230738872  
"2670","GANAB",367.917100850027,0.234989718123407,0.137098647198519,1.  
71401923305006,0.0865251936552591,0.499658230738872  
"2671","SMC5-  
AS1",5.13247399653083,-1.14164223924239,0.666477132004863,-1.712950354  
06265,0.0867216734054604,0.500370530218849  
"2672","NME1",209.521350038412,-0.580076129959521,0.338688636639569,-1.  
.71271211138045,0.0867655158790128,0.500370530218849  
"2673","ATRX",903.112805545022,0.339649324963547,0.198299943919971,1.7  
1280595571233,0.0867482440937533,0.500370530218849  
"2674","ZNF471",33.1377417247488,0.582653183567976,0.3402677580704,1.7  
1233732773303,0.086834521441726,0.500581207189307  
"2675","ZNF669",37.4739248503449,-0.504132455245797,0.294544887849997,  
-1.71156409783808,0.0869770293485236,0.500840832053602  
"2676","ACSM5",7.20076935289758,-1.1307163040952,0.660621707302315,-1.  
71159423251855,0.0869714719299676,0.500840832053602  
"2677","ACTG1",11991.0351741497,-0.440283092314344,0.257190872356669,-  
1.71189237114047,0.0869165048400286,0.500840832053602  
"2678","MAPKAPK3",39.1534139965011,-0.469108099588475,0.27415721764731  
5,-1.71109155401464,0.0870642130751326,0.501033113758782  
"2679","LATS1",131.203139630551,0.354220400222701,0.207021638826307,1.  
71103079963489,0.0870754272954769,0.501033113758782  
"2680","EML1",227.619545981073,-0.401842299575614,0.234899382508838,-1.  
.71069968462133,0.0871365659619886,0.501168766479934  
"2681","ZNF426",110.723229716914,0.357859866828275,0.209207361393951,1.  
.71055102671269,0.0871640261390012,0.501168766479934  
"2682","DENND2D",6.80525467693977,1.07406102859083,0.628037121080575,1.  
.71018717292196,0.0872312668943636,0.501368374040498  
"2683","SPRYD7",79.5878720331116,-0.40195158972123,0.235077811218244,-  
1.70986614022904,0.0872906289980427,0.501522566531803  
"2684","AC073316.1",14.3447054884112,0.977283093712532,0.5716686863860  
34,1.70952706871301,0.0873533620506628,0.501696004475025

"2685", "AC245407.2", 49.071373346154, -0.533599810827989, 0.3122808096284  
46, -1.70871790508956, 0.0875032158297701, 0.501879589834276  
"2686", "AMOTL2", 563.045077394581, 0.349622564200667, 0.204640060011314, 1  
.70847567275605, 0.0875481165789405, 0.501879589834276  
"2687", "GTF2IRD2B", 89.5950842638555, 0.353345914742363, 0.20680609488132  
1, 1.70858559533816, 0.087527738770165, 0.501879589834276  
"2688", "AC130895.1", 9.60035160242447, 0.895770792770147, 0.5242807789628  
9, 1.7085707291084, 0.0875304944968036, 0.501879589834276  
"2689", "AC026401.1", 3.31929816733376, -1.62934662594991, 0.9534645213494  
31, -1.70886969516591, 0.0874750891379267, 0.501879589834276  
"2690", "CDC26", 435.88615188685, -0.425430371110616, 0.249191954603555, -1  
.70723959281688, 0.0877775287442029, 0.502822771563074  
"2691", "RAB8B", 362.170797421529, 0.371421248904316, 0.217556848017644, 1.  
70723768196069, 0.0877778837675142, 0.502822771563074  
"2692", "BBS10", 55.8753499925946, 0.434748562790068, 0.254704296273293, 1.  
7068756560101, 0.0878451664791242, 0.502834475037393  
"2693", "RCVRN", 7.18084846446115, 1.13473770694915, 0.664787282616386, 1.7  
0691849351148, 0.0878372029380864, 0.502834475037393  
"2694", "PANTR1", 2.5681827721079, -1.76800371284729, 1.03629309461378, -1.  
70608462223346, 0.0879923252580544, 0.503489864087939  
"2695", "LARP1B", 122.646379591256, -0.374574015129267, 0.219636023073311,  
-1.70543069341699, 0.0881141279662722, 0.503918996309955  
"2696", "PLEKH02", 80.9925380971038, 0.436971810465662, 0.256238701958391,  
1.7053310336259, 0.0881327028252766, 0.503918996309955  
"2697", "FRY", 8.56956684874961, -0.968915561928948, 0.568519109763521, -1.  
70427967202716, 0.0883288508207853, 0.504563901392321  
"2698", "MGA", 117.295345912321, 0.416846211734148, 0.244579721827182, 1.70  
433676438919, 0.0883181903163372, 0.504563901392321  
"2699", "PBDC1", 279.792931754114, -0.428947906873303, 0.251700418383743, -  
1.70420021399936, 0.0883436892544842, 0.504563901392321  
"2700", "KAT6A", 238.003009871052, 0.349518298990122, 0.205164762554336, 1.  
70359809666417, 0.0884561973124685, 0.504863905818836  
"2701", "CCDC189", 10.36564586009, -0.802113462361936, 0.470843077411007, -  
1.70356855785682, 0.0884617197286199, 0.504863905818836  
"2702", "NADK", 116.806940708058, 0.342740937116241, 0.201221437863405, 1.7  
0330229599543, 0.0885115111541928, 0.504961119334523  
"2703", "DYNLL1", 2750.47386041827, -0.46517705882083, 0.273135124611733, -  
1.70310229957457, 0.0885489256825467, 0.504987676432282  
"2704", "SENP7", 153.429154220539, 0.327882221706216, 0.192568672100428, 1.  
70267685875312, 0.0886285578448742, 0.505254888749532  
"2705", "FNDC3B", 734.758025208565, 0.42029396070802, 0.246874817362261, 1.  
702457809179, 0.088669581094001, 0.505300955875925  
"2706", "MOK", 74.3070147194044, -0.398905030887314, 0.234335222812601, -1.  
70228370323278, 0.0887021982873989, 0.505300955875925  
"2707", "PCID2", 248.591064082749, -0.279595702414937, 0.164305150381778, -  
1.70168556350954, 0.0888143280961719, 0.5057528140386  
"2708", "LINC00886", 9.24594897196904, 0.93345201717588, 0.548848365085355  
, 1.70074664799396, 0.0889905715148405, 0.506569298338725  
"2709", "C7", 44.2516892120089, -0.78049878191828, 0.459313102059054, -1.69  
927393409721, 0.0892675814823292, 0.507711789687633

"2710", "NDUFAF4", 74.6686398459872, -0.445713088879315, 0.262314639655281, -1.69915445613347, 0.0892900851017303, 0.507711789687633  
"2711", "ZNF433-  
AS1", 22.4165510658334, -0.596265012125614, 0.350860894618105, -1.69943422385279, 0.0892373981562208, 0.507711789687633  
"2712", "GPD1L", 41.740278204434, 0.560177251954183, 0.329866683700464, 1.69819287498234, 0.0894713648794267, 0.508180209880753  
"2713", "MFHAS1", 69.6943256337654, -0.396375632830406, 0.233380740973005, -1.69840763714198, 0.0894308516751433, 0.508180209880753  
"2714", "AC120053.1", 15.2873330510825, 0.818168784629642, 0.481759485273447, 1.69829304796199, 0.0894524661903596, 0.508180209880753  
"2715", "HEATR5A", 131.094995850322, 0.418775388858537, 0.246635855400775, 1.69795015480633, 0.0895171699345049, 0.508253102961471  
"2716", "HPF1", 307.756595691816, -0.39552367549758, 0.233003550697544, -1.69750063599245, 0.0896020509630842, 0.508547722973469  
"2717", "CENPA", 26.3681177589301, 2.36667628559739, 1.39453290594386, 1.69711039123567, 0.089675792023988, 0.508591734381815  
"2718", "TNKS1BP1", 323.06099243762, 0.348833482351827, 0.20554031522735, 1.69715358257566, 0.0896676281389025, 0.508591734381815  
"2719", "INHBB", 110.501860092033, 0.819165341007604, 0.482883713573672, 1.69640291851058, 0.0898096013961471, 0.508976104971179  
"2720", "JAGN1", 269.005852293253, -0.40983053172956, 0.241569756608397, -1.69653079708122, 0.089785402914348, 0.508976104971179  
"2721", "HECW2", 101.928071644438, 0.462972028097744, 0.273080708432349, 1.69536702447964, 0.0900058173668263, 0.509491010947208  
"2722", "SLC25A25", 73.3323813766, -0.793695763250928, 0.468081061283742, -1.69563742030957, 0.0899545665435315, 0.509491010947208  
"2723", "WDR11", 192.019912569761, 0.451514701986473, 0.266340856272925, 1.6952513718879, 0.0900277453328228, 0.509491010947208  
"2724", "AR", 438.748936313901, 0.396225167645158, 0.233730074954438, 1.69522543353651, 0.0900326638871356, 0.509491010947208  
"2725", "EREG", 19.1891539235914, -1.15053119028959, 0.678999721253139, -1.69445016585015, 0.0901797737217577, 0.509575224311179  
"2726", "SLC27A4", 26.1388123573467, -0.690532337180413, 0.407509757735801, -1.69451730681773, 0.0901670258353731, 0.509575224311179  
"2727", "LENG8", 268.442925521453, 0.426491457485765, 0.251684446024557, 1.69454832915719, 0.0901611361917843, 0.509575224311179  
"2728", "RPRD1B", 72.7589411327277, 0.392643428731714, 0.231656003574856, 1.69494173547217, 0.0900864741922276, 0.509575224311179  
"2729", "PRDX6", 1411.82553013574, -0.410295772375848, 0.242171231227909, -1.69423828873264, 0.0902200118070642, 0.509615786737228  
"2730", "PSMD6-  
AS1", 5.29647985704913, 1.22995440561824, 0.726225193047703, 1.69362673918895, 0.0903362336690045, 0.509711948026246  
"2731", "AC135279.4", 3.06054322691445, -2.08274113262585, 1.22951387720668, -1.69395496158011, 0.09027384171444, 0.509711948026246  
"2732", "CSF2RA", 3.05630093100804, -1.81861153841169, 1.07377360077253, -1.69366385716997, 0.0903291761542959, 0.509711948026246  
"2733", "APPL2", 284.224558025792, 0.299639635790406, 0.176951967954359, 1.69333881535407, 0.0903909938156434, 0.509745428811736

"2734", "AC0T4", 13.3267105391365, 0.865405588269925, 0.5110920992743, 1.69324783047657, 0.0904083037542191, 0.509745428811736  
"2735", "SEC14L5", 11.3999737161126, 0.885776897977467, 0.523195234969417, 1.6930140772961, 0.090452787693654, 0.509809770492752  
"2736", "PTPRH", 10.6995082952638, 1.05269480938977, 0.621909093330597, 1.69268277418509, 0.0905158658452544, 0.50997882748706  
"2737", "C1QTNF12", 3.37787950343229, -1.62351101665029, 0.961080004407081, -1.68925688725767, 0.091170211506944, 0.510331911659202  
"2738", "EIF4G3", 225.989746238488, 0.340611038037086, 0.201570757118392, 1.68978398903879, 0.0910692880198414, 0.510331911659202  
"2739", "PALMD", 35.8383063637694, -0.927448132761657, 0.548325384514373, -1.69141929035997, 0.090756750582038, 0.510331911659202  
"2740", "TMEM17", 20.9681044158954, 0.659479309990959, 0.390188057400225, 1.69015759832576, 0.0909978079562085, 0.510331911659202  
"2741", "LOXL3", 27.2001528524146, -0.652889960423131, 0.38633399738791, -1.68996248023075, 0.0910351329125158, 0.510331911659202  
"2742", "NR2C2", 103.747210606847, 0.385243974050286, 0.227736795610797, 1.69161936707263, 0.0907185713888195, 0.510331911659202  
"2743", "GNL3", 240.150782686998, -0.345197088525136, 0.204291425570724, -1.68972871749643, 0.0910798665718117, 0.510331911659202  
"2744", "POLK", 242.59562751677, 0.300767056002495, 0.177869093727542, 1.6909461317839, 0.0908470914349987, 0.510331911659202  
"2745", "AC087854.1", 16.4686612103355, 0.889089761643978, 0.526326932897215, 1.68923478179219, 0.0911744459753124, 0.510331911659202  
"2746", "NOL8", 164.364752068119, 0.274252205182676, 0.162200407651803, 1.69082315607625, 0.0908705832026274, 0.510331911659202  
"2747", "IRF7", 104.572430882775, -0.563582321251121, 0.333548122108468, -1.68965820490468, 0.0910933635787365, 0.510331911659202  
"2748", "EGLN3", 18.5939331660882, -1.06842447112313, 0.632392556307433, -1.68949564707356, 0.091124485342604, 0.510331911659202  
"2749", "MYZAP", 2.99740611048572, -1.63822480712012, 0.969383178472956, -1.68996620067286, 0.0910344210984752, 0.510331911659202  
"2750", "ZNF48", 17.0785651296981, -0.639971896269698, 0.378585717307272, -1.69042799823924, 0.0909461023710804, 0.510331911659202  
"2751", "TSR1", 73.3493952369118, -0.362109009720026, 0.21407064484386, -1.69153977176153, 0.0907337584391583, 0.510331911659202  
"2752", "FAM117A", 74.244802255115, 0.458845621563848, 0.271435443636584, 1.6904410692149, 0.0909436035517188, 0.510331911659202  
"2753", "EPS15L1", 98.2717267251966, 0.356877516419366, 0.211225080835232, 1.68956032592432, 0.0911121015260247, 0.510331911659202  
"2754", "LILRA6", 3.02079346636312, -1.83812111687557, 1.08788615726054, -1.68962634978667, 0.0910994615808483, 0.510331911659202  
"2755", "PPP1R32", 7.38916754786649, 0.985419132358795, 0.583531386946491, 1.6887165873207, 0.0912737553362585, 0.510346046625653  
"2756", "DIP2B", 56.2530663696861, 0.495676088184769, 0.293554678268078, 1.68853070613343, 0.0913093997141454, 0.510346046625653  
"2757", "N4BP2L2-IT2", 6.28348152104962, 1.22905213335982, 0.727869703795792, 1.68856064066192, 0.0913036587451254, 0.510346046625653  
"2758", "JMJD6", 70.7931274525636, -0.380943571142126, 0.225583635071655, -



1.68870215705639,0.0912765220677734,0.510346046625653  
"2759","AC097448.1",51.5298177624433,-0.621009119395267,0.367862381154  
256,-1.68815609099985,0.0913812695128691,0.51056262034827  
"2760","MRT04",138.654455000199,-0.409398493001305,0.242566597175761,-  
1.68777769803424,0.0914539102431072,0.510604774120825  
"2761","UTP3",105.705218174455,-0.334894222573698,0.198423887865544,-1  
.6877717001525,0.0914550620400647,0.510604774120825  
"2762","NPFF",10.3746387634696,0.907180614851828,0.537563340332667,1.6  
875790196006,0.0914920694527748,0.510626448448415  
"2763","SLC27A3",383.85416970957,-0.435912405126037,0.258755578246913,  
-1.68464930526087,0.0920562526544284,0.510951647592535  
"2764","TPM3",801.758814212272,-0.300645098376831,0.178267856274235,-1  
.68647957439023,0.0917034660111668,0.510951647592535  
"2765","UAP1",1010.89336562383,-0.458295784108511,0.271827711149945,-1  
.68597889512342,0.0917998644359067,0.510951647592535  
"2766","RMDN2",43.4430432710668,0.526149556752912,0.312474551412075,1.  
68381570395169,0.092217291301042,0.510951647592535  
"2767","SLC3A1",3.29331816550029,1.97429856780593,1.17068461351575,1.6  
8644786564402,0.091709568649898,0.510951647592535  
"2768","BHLHE40",206.773821826316,-0.725298852606762,0.4303055254608,-  
1.68554389774583,0.0918836828667327,0.510951647592535  
"2769","CD47",828.418078307727,-0.313553640507115,0.186245389900613,-1  
.68355115084694,0.0922684460696567,0.510951647592535  
"2770","NOP14",68.3553341631393,-0.412227651159678,0.244409044754371,-  
1.68663009821901,0.0916745007725223,0.510951647592535  
"2771","RGS12",88.6255181289163,0.426794789045001,0.253232113676997,1.  
68538967213845,0.0919134149295881,0.510951647592535  
"2772","MARCH3",168.614428789652,0.447545164949289,0.265297705002617,1  
.68695452885608,0.0916120957188148,0.510951647592535  
"2773","AC114296.1",3.67918039503283,-1.41584212787357,0.8406043751428  
29,-1.68431448817168,0.0921209068762649,0.510951647592535  
"2774","PDAP1",693.816931599657,-0.335618572123814,0.199116249671477,-  
1.68554084700547,0.09188427092244,0.510951647592535  
"2775","FBXL13",3.35225027470802,1.53599109699865,0.91105120005467,1.6  
8595474865351,0.0918045155406976,0.510951647592535  
"2776","RC3H2",136.872055456691,0.343329426951232,0.203619850680382,1.  
68612945056202,0.0917708686446212,0.510951647592535  
"2777","ACAD10",30.0523212492305,0.573017477176772,0.34030209531727,1.  
68384939458729,0.092210778415902,0.510951647592535  
"2778","SECISBP2L",246.841384098846,0.363737615474025,0.21594336260805  
4,1.68441211195837,0.0921020516531352,0.510951647592535  
"2779","AC009560.3",4.76257997583133,1.55294287191272,0.92153157213975  
6,1.68517598187858,0.091954623536086,0.510951647592535  
"2780","BOLA2B",18.6726010566205,-0.851948557006177,0.506059842814943,  
-1.68349369961315,0.0922795580212532,0.510951647592535  
"2781","DHODH",22.3707239293092,-0.563219457050048,0.334220747423839,-  
1.68517203492399,0.0919553848170541,0.510951647592535  
"2782","SLC13A3",7.7842106192106,-0.889458767789234,0.528255845537404,  
-1.68376512120632,0.0922270703681169,0.510951647592535  
"2783","ICOSLG",14.3482620287908,-0.893856416113103,0.530468024699894,

-1.68503354489423,0.0919820997121411,0.510951647592535  
"2784","GPM6B",8.26493259611756,-1.0100486631437,0.599897222336825,-1.68370285031356,0.0922391102266001,0.510951647592535  
"2785","TIMM23B",31.8044839852857,-0.554879824482018,0.329711305854988,-1.68292628923699,0.0923893616457683,0.511375946057278  
"2786","LRR8D",22.9033019042835,0.59456508506984,0.353393404260195,1.6824453368464,0.0924825163108752,0.511524215619714  
"2787","NUDT14",42.4960979080448,0.658581400340915,0.391438349977698,1.68246519631619,0.0924786682792684,0.511524215619714  
"2788","AKT3-IT1",2.86301910090853,1.83255842013382,1.08934878711291,1.68225130629707,0.0925201190286914,0.511548649507632  
"2789","TMEM9B-AS1",15.3808258728534,0.791608191873567,0.470680010167356,1.68183941270865,0.0925999838442653,0.511623208229157  
"2790","PTPN9",107.690876603191,0.369219950120368,0.219532404149166,1.68184715851558,0.0925984814471884,0.511623208229157  
"2791","FRS2",143.11017617668,0.375475422245387,0.223358834572761,1.68104128481685,0.0927548957681881,0.512295492033901  
"2792","MT1F",101.603198984828,-1.33727113396944,0.795861978264272,-1.68028021251367,0.0929028091403898,0.51274500640856  
"2793","AC015912.3",39.2587656136359,-0.791895596837024,0.471275882314033,-1.68032277176736,0.092894532812283,0.51274500640856  
"2794","AL590617.2",4.97995368140095,-1.35378812516552,0.805924680760308,-1.67979484619872,0.092997238261283,0.513082472368532  
"2795","PELI1",53.2548170125762,-0.701040975785122,0.417387634502248,-1.67959210536063,0.0930367047556469,0.513116566657709  
"2796","IGF1",1084.96237187884,-0.58766386926196,0.349979954712115,-1.67913579434959,0.0931255816003351,0.513382828533595  
"2797","TMSB15B.1",18.8247312277803,0.746981401810872,0.44489599028256,1.67900232442296,0.0931515907498193,0.513382828533595  
"2798","DACT3",20.9742420635035,-0.708833758281461,0.422283433143481,-1.67857344770761,0.0932352049846681,0.513660001729328  
"2799","RPS6KC1",85.5799198776128,0.420332684764508,0.250576347854698,1.67746352903286,0.0934518754795028,0.514669760813339  
"2800","RHBDD1",46.9858841059363,0.434603144291972,0.259302070682506,1.67604964799571,0.0937284682219533,0.514721887296548  
"2801","PRDM5",83.1495787182644,0.36436680999015,0.217262718907355,1.67707930666892,0.0935269747174619,0.514721887296548  
"2802","ACSL1",102.868034162805,0.425172879923394,0.253631284666852,1.67634241368081,0.0936711416261352,0.514721887296548  
"2803","AC106739.1",32.3557265622736,-0.695269972102857,0.414781607142292,-1.67623144356144,0.093692867430275,0.514721887296548  
"2804","VM01",9.41090784277804,-0.889794837675418,0.530813849597076,-1.67628414057175,0.0936825498704762,0.514721887296548  
"2805","RPL28",14122.9353253087,-0.366616360887461,0.21870288971128,-1.67632152172954,0.0936752315575146,0.514721887296548  
"2806","ASPHD2",12.3967179197033,-0.685188699078963,0.408789679754946,-1.67613991500399,0.093710789993943,0.514721887296548  
"2807","TSIX",40.2461137896334,0.948425874949318,0.565668624233942,1.6

76645715031,0.0936117817004613,0.514721887296548  
"2808","ZNF180",32.9738693764304,0.455368635812355,0.271733891273962,1  
.67578888918664,0.0937795512255867,0.51481901073448  
"2809","CCRL2",3.90764558394616,-1.52905884809822,0.912882488125567,-1  
.67497883680281,0.0939383840244639,0.515285056254778  
"2810","NSD1",198.268615345938,0.321253134193574,0.191808499862237,1.6  
7486391074592,0.0939609358672404,0.515285056254778  
"2811","PHIP",509.222166578807,0.326876150002825,0.195187896352132,1.6  
7467428109947,0.0939981562237065,0.515285056254778  
"2812","PEG3",62.2572684626238,0.629851674801743,0.376082210134308,1.6  
747712543404,0.093979120916145,0.515285056254778  
"2813","AC104984.3",5.1031474983168,1.28793807761777,0.769375461579597  
,1.67400462054446,0.0941296912706064,0.51582267719033  
"2814","ZNF736",32.132345970054,0.514759454394259,0.30759994597804,1.6  
7347056176339,0.0942346970947397,0.516214589806472  
"2815","WTAP",491.860826228535,-0.364327680615375,0.217766180142719,-1  
.67302232319363,0.0943229015474731,0.516332274296497  
"2816","HK1",116.219028045335,-0.360957822679562,0.215756506251466,-1.  
67298696549555,0.0943298620558437,0.516332274296497  
"2817","KRT27",37.7004310606152,1.01568507808355,0.607158189757104,1.6  
7285082408239,0.09435666666839,0.516332274296497  
"2818","RABAC1",1823.39536177637,-0.410919056309329,0.245691830281602,  
-1.67249784349097,0.0944261927541513,0.516529368809525  
"2819","SLC4A11",5.07710313247278,1.87101398589093,1.1188513449587,1.6  
7226324955618,0.0944724230985555,0.516598936525092  
"2820","DCTN5",103.990137550743,0.314196494603467,0.187956201792877,1.  
6716473923521,0.0945938735658661,0.517076608266241  
"2821","ZC3H4",85.2485722090041,0.427472742155646,0.255745021274316,1.  
67148021113237,0.0946268642179089,0.517076608266241  
"2822","WDR26",185.286686307366,0.349509360800493,0.209159605249383,1.  
6710175006487,0.0947182211209986,0.517209131625998  
"2823","ZBTB7C",21.044923175348,0.703572436641006,0.421013343848829,1.  
67114046839721,0.0946939356498614,0.517209131625998  
"2824","ADSS",221.347452395527,-0.346826670660217,0.207577514419229,-1  
.67082967358284,0.0947553255933187,0.517228521253898  
"2825","NBEA",22.6025836504803,0.782785252899386,0.468596212255215,1.6  
7048992805996,0.094822470525243,0.517356589183421  
"2826","ADRM1",286.503943340465,-0.419014233607922,0.250850943708295,-  
1.67037136641262,0.0948459111924974,0.517356589183421  
"2827","EAF1",48.2388562932385,-0.407052035781448,0.243749635782101,-1  
.66995956517174,0.0949273639448446,0.517617727346933  
"2828","MYCBP",25.2855608254822,-0.593739280520295,0.35584595479637,-1  
.66852895899873,0.0952107681391479,0.517924717245849  
"2829","RGS16",366.284850063736,-1.03873708250379,0.62293316310809,-1.  
66749363177434,0.0954162896493028,0.517924717245849  
"2830","EIF5A2",69.1360266938774,-0.384277719465811,0.230402457031573,  
-1.66785425996196,0.0953446615146752,0.517924717245849  
"2831","DNAJB11",219.479554500037,-0.356772028773598,0.21393312562637,  
-1.66768015812892,0.0953792363215973,0.517924717245849  
"2832","FAM8A1",213.989532908822,0.353932744575098,0.212250656323864,1

.66752249771632,0.0954105546966407,0.517924717245849  
"2833","AC004839.2",3.1894600973693,-1.39036084371396,0.83371060774495  
5,-1.66767800577067,0.0953796638203058,0.517924717245849  
"2834","PDE7A",137.028626341896,0.454955474796536,0.272814217008414,1.  
66763843829482,0.095387522936357,0.517924717245849  
"2835","OSGIN2",106.211213720043,-0.480509903363197,0.288147405897089,  
-1.66758365173279,0.0953984058096325,0.517924717245849  
"2836","MRPL41",491.098601787771,-0.379777935262369,0.227714631559608,  
-1.66778011874461,0.0953593839593257,0.517924717245849  
"2837","LARP4B",93.954944657111,0.42393609695295,0.254238702459126,1.6  
6747270518778,0.0954204474199294,0.517924717245849  
"2838","SFXN4",60.999083458542,-0.49224032221567,0.295163070947184,-1.  
66768939161685,0.0953774023951629,0.517924717245849  
"2839","NSMCE1-  
DT",11.4266929876983,0.97916815756263,0.586757682055594,1.668777738251  
85,0.0951614361556778,0.517924717245849  
"2840","CLTC",569.734942139145,0.251935445047069,0.150970970825952,1.6  
6876747012189,0.095163471881785,0.517924717245849  
"2841","STK17A",214.910617024667,0.428837609472146,0.257349061213915,1.  
.66636554821424,0.0956406283844471,0.518327705993765  
"2842","FJX1",26.578330906414,-0.710910987602643,0.426538338849339,-1.  
66669891743014,0.095574288290725,0.518327705993765  
"2843","PCED1B",11.5427975877078,0.922790642273416,0.553730753797892,1.  
.6664970040841,0.0956144644149464,0.518327705993765  
"2844","IKZF3",6.20221886110327,1.3382401384343,0.802960534131974,1.66  
663251996685,0.0955874983709424,0.518327705993765  
"2845","LGI4",98.3876429359706,0.730871341354112,0.438631386658733,1.6  
6625408847623,0.0956628169673864,0.518327705993765  
"2846","TAOK1",374.202444218563,0.380810215392796,0.228708458951954,1.  
66504648379794,0.0959034823197654,0.519449114532391  
"2847","HARS",157.510261984117,-0.352427386712757,0.211721930066812,-1.  
.66457667659436,0.0959972417519986,0.519477104610884  
"2848","IL10RA",13.3786356752363,-0.919303599437545,0.552275403908151,  
-1.66457458168902,0.0959976599965366,0.519477104610884  
"2849","ADAM10",166.540665505002,0.473855314616763,0.284680876343756,1.  
.66451403656836,0.0960097483643469,0.519477104610884  
"2850","AL021707.2",7.20889764892519,0.962331400933081,0.5784521711884  
1,1.6636317553377,0.09618604187215,0.520248363319015  
"2851","AL158151.3",3.79320022566261,1.5208746498378,0.914422143984655  
,1.66320846432096,0.0962707139048765,0.520523695139835  
"2852","RABGGTB",140.082404384021,-0.359477570697898,0.216472744674095  
, -1.66061353931231,0.0967910879910932,0.520643950233382  
"2853","DUSP19",11.405198076931,0.805102278665579,0.484648263554359,1.  
6612094568565,0.096671386929661,0.520643950233382  
"2854","CLASP2",115.817219572789,0.410738066754801,0.247308392336113,1.  
.66083351589854,0.0967468878293779,0.520643950233382  
"2855","HIST1H2BC",9.61935239148272,0.883647696771676,0.53213607442404  
1,1.66056717302636,0.0968004064855911,0.520643950233382  
"2856","ANKS1A",95.188056260177,0.45341078883395,0.272955438445331,1.6  
6111652296227,0.0966900466243613,0.520643950233382

"2857", "BICRAL", 137.426358697253, 0.335416979246594, 0.202009349198511, 1.66040324656947, 0.096833357464749, 0.520643950233382  
"2858", "FOX03", 551.702501060317, 0.522802405423878, 0.314583289470884, 1.66188867280017, 0.0965350982688046, 0.520643950233382  
"2859", "AC144652.1", 11.3017536216579, -0.855022594334361, 0.514388857028859, -1.66221056823241, 0.0964705617702608, 0.520643950233382  
"2860", "FAM92A", 221.169686987927, -0.404050830117404, 0.243141841374091, -1.6617906150334, 0.0965547646356283, 0.520643950233382  
"2861", "FBP1", 21.0797386997702, 0.772337459158451, 0.464523554288993, 1.66264434177208, 0.096383649541939, 0.520643950233382  
"2862", "ZER1", 88.0234368935072, 0.328763204512699, 0.197871632899816, 1.66149740462875, 0.0966135897395856, 0.520643950233382  
"2863", "PLCE1", 73.1556038786762, 0.476639116737999, 0.28700642992703, 1.66072626616478, 0.0967684356310413, 0.520643950233382  
"2864", "SLC25A45", 43.3548689264534, 0.563506468900141, 0.338931560567577, 1.66259662557388, 0.0963932070414597, 0.520643950233382  
"2865", "VPS11", 94.1048731790635, 0.336554749533606, 0.20252511236286, 1.66179268144588, 0.0965543501649672, 0.520643950233382  
"2866", "TRAFD1", 80.180207020262, 0.348837621138439, 0.209934109916613, 1.66165289326732, 0.0965823913859172, 0.520643950233382  
"2867", "SLC46A3", 30.2079328777836, 0.555160059508205, 0.334055016176793, 1.66188212307639, 0.0965364117749215, 0.520643950233382  
"2868", "UBR2", 180.162132487842, 0.309742176966321, 0.18661244910108, 1.65981518627703, 0.0969516377194374, 0.520916519848424  
"2869", "LINC01422", 5.57901313964283, 1.19139139155715, 0.717772243547472, 1.65984600584287, 0.0969454359193504, 0.520916519848424  
"2870", "MRPL28", 193.360792884085, -0.441799013351447, 0.266263359445874, -1.65925576193016, 0.0970642654520226, 0.52133994841217  
"2871", "AC004951.1", 22.1713391074167, 0.848114795372749, 0.511250539417164, 1.65890249492865, 0.0971354418325008, 0.521540521019854  
"2872", "NOTCH2NLA", 33.3904825244242, 0.668043438588288, 0.403054060299416, 1.65745368770636, 0.0974277847244059, 0.522502024703074  
"2873", "ZNF169", 8.47437133410628, 0.884970322445601, 0.533944626008916, 1.65741966364659, 0.0974346586021653, 0.522502024703074  
"2874", "ZCCHC8", 100.340950038667, 0.431916639865553, 0.260564787844544, 1.65761706882374, 0.0973947822513665, 0.522502024703074  
"2875", "ADGRG4", 2.61552844838306, 2.08022895125043, 1.25515880699821, 1.657343229918, 0.0974501019151045, 0.522502024703074  
"2876", "ARHGDI A", 618.967848054073, -0.296345598556001, 0.178879469491244, -1.6566775348722, 0.0975846872761561, 0.523041708748938  
"2877", "RUFY3", 440.478796611403, 0.328349970404988, 0.198409265659503, 1.65491248260795, 0.0979422518236817, 0.52459340231482  
"2878", "PIP4K2B", 143.059434171467, 0.343170303596848, 0.207360505382689, 1.65494534729995, 0.097935584539013, 0.52459340231482  
"2879", "TRIM52", 63.5009492102906, 0.508109931573905, 0.307161830851273, 1.65420921657395, 0.0980850108570572, 0.524993209153312  
"2880", "FAM199X", 62.7230334354289, 0.368780504547873, 0.222934469549694, 1.65421033944537, 0.0980847827880821, 0.524993209153312  
"2881", "AC147067.1", 39.7942945107077, -0.612220701368877, 0.370237624907445, -1.65358856091929, 0.0982111384875769, 0.525292643913144

"2882", "JMY", 113.83604931478, 0.418218075299136, 0.252921669646135, 1.65354781930812, 0.0982194223946451, 0.525292643913144  
"2883", "CREB5", 749.531810189938, 0.444815260024181, 0.269025601162145, 1.65343096754604, 0.0982431847162889, 0.525292643913144  
"2884", "RARB", 3.07223030856176, 1.56125644371823, 0.94469467030378, 1.65265719474863, 0.0984006507239445, 0.525587675297853  
"2885", "MEST", 769.10863892814, 0.763689153417479, 0.462071935899873, 1.65274948354138, 0.0983818589879879, 0.525587675297853  
"2886", "PODXL", 8.52758535334849, -1.145578939509, 0.693079386315887, -1.65288271751726, 0.0983547350972292, 0.525587675297853  
"2887", "GPR157", 16.1328763179761, -0.677556961148445, 0.410256072243072, -1.65154645352087, 0.098627043482766, 0.525811177995159  
"2888", "AC118549.1", 116.355107785331, 0.311595653182194, 0.18881657125259, 1.65025586003972, 0.0988906160972581, 0.525811177995159  
"2889", "PDK1", 28.6418076022999, 0.60391249056347, 0.365532658450403, 1.65214373217328, 0.0985052537170253, 0.525811177995159  
"2890", "SLC12A8", 4.68470229975853, -1.59107471328597, 0.963966863780703, -1.65054917660316, 0.0988306639400449, 0.525811177995159  
"2891", "SERPINI1", 36.6976150736337, -0.746425167447079, 0.451987988894926, -1.65142699758909, 0.0986514158981966, 0.525811177995159  
"2892", "AL355312.2", 11.1722692667854, 0.883706997367918, 0.534949517548089, 1.65194465716754, 0.0985458333101006, 0.525811177995159  
"2893", "TRA2A", 482.285282121412, 0.302140529725569, 0.183020526853669, 1.65085597183938, 0.0987679878709342, 0.525811177995159  
"2894", "ZNF189", 44.6699947972006, 0.50827613043114, 0.307896863409756, 1.65079996204675, 0.0987794279020189, 0.525811177995159  
"2895", "MDM2", 159.317941296139, 0.310316981799824, 0.188058137992023, 1.6501119553411, 0.0989200399731405, 0.525811177995159  
"2896", "PGAM5", 30.6877872101275, -0.510667097585868, 0.309364036025072, -1.65069962283684, 0.0987999248860408, 0.525811177995159  
"2897", "ADAMTS17", 6.47013749088193, 1.20500141064006, 0.730011316628823, 1.65066127495768, 0.0988077593691323, 0.525811177995159  
"2898", "FLCN", 155.82658316697, 0.425393223115611, 0.257628278722692, 1.65118994399485, 0.0986997958287705, 0.525811177995159  
"2899", "SOGA1", 121.834699448585, 0.381059122307633, 0.230897833408958, 1.65033650026813, 0.0988741308225017, 0.525811177995159  
"2900", "SMARCA1", 429.755282700909, 0.352429741149951, 0.21343972782174, 1.65119092282713, 0.0986995960213437, 0.525811177995159  
"2901", "ELP5", 174.006017028143, -0.50022224937576, 0.303313779815765, -1.64919064896952, 0.09910858307368, 0.526631784929603  
"2902", "YBX1", 3897.25124717551, -0.337089837242319, 0.204510552431092, -1.64827600940494, 0.0992960454153943, 0.526938702554842  
"2903", "ZNF660", 31.4000063723823, 0.611064418541166, 0.370737136290535, 1.64824172904625, 0.0993030769329754, 0.526938702554842  
"2904", "VPS36", 303.971757439436, 0.370053090975281, 0.224486217713881, 1.64844458935529, 0.099261472418832, 0.526938702554842  
"2905", "SC02", 134.553013221947, -0.442831014564223, 0.268615547343417, -1.64856807040315, 0.0992361545664594, 0.526938702554842  
"2906", "ZNF304", 15.9435207395342, 0.719570379137302, 0.436657466947119, 1.64790581543965, 0.0993719998737219, 0.527122979371446

"2907", "ZC3H12A", 44.5607737537776, -0.64389657363429, 0.390817664123485, -1.6475626174124, 0.099442456849527, 0.527315263961286  
"2908", "CHMP3", 682.238456140211, -0.361773252324923, 0.21976245876031, -1.64620133195498, 0.0997223151434396, 0.527452451441018  
"2909", "HIST1H2BD", 8.59783859567037, 1.21394877392869, 0.737276065902527, 1.64653218797039, 0.0996542387720943, 0.527452451441018  
"2910", "CCDC6", 228.354553817746, 0.370916837995074, 0.225385091337798, 1.64570263185314, 0.0998249969159639, 0.527452451441018  
"2911", "EBF3", 347.846074712217, 0.407136476928804, 0.247312158191431, 1.64624529544424, 0.0997132671542133, 0.527452451441018  
"2912", "RASSF3", 20.6951186405092, -0.655302139886666, 0.398190454167093, -1.64570027490333, 0.0998254824093282, 0.527452451441018  
"2913", "STX4", 389.99091896047, -0.311907276092722, 0.189512408628202, -1.64584091538113, 0.0997965160522996, 0.527452451441018  
"2914", "CDRT4", 15.6848476570412, 0.658360092685223, 0.399995727442077, 1.64591781241103, 0.0997806811507854, 0.527452451441018  
"2915", "ACACA", 45.4039576897838, 0.47456605900907, 0.288383606520167, 1.64560692175088, 0.0998447131563342, 0.527452451441018  
"2916", "SGSH", 67.4864990421991, 0.417858152736341, 0.253903134342272, 1.64573845777363, 0.0998176175903147, 0.527452451441018  
"2917", "ZNF737", 66.730516458312, 0.49081900060323, 0.298070127538624, 1.64665612302806, 0.0996287476511844, 0.527452451441018  
"2918", "ZMYM3", 44.6056171401814, 0.464553107414909, 0.282104873801974, 1.64673903415439, 0.0996116972888086, 0.527452451441018  
"2919", "LRCH3", 198.906149764501, 0.359073457165454, 0.218307189891638, 1.64480820509708, 0.100009369574083, 0.527812470411869  
"2920", "RWDD1", 1091.06015675885, -0.353384505635267, 0.214870959359609, -1.64463595587081, 0.100044907331002, 0.527812470411869  
"2921", "INTS10", 208.485072864409, -0.263534416611018, 0.160206084753191, -1.64497133187551, 0.0999757232047825, 0.527812470411869  
"2922", "CC2D2B", 2.61668685534902, 2.19392501427722, 1.33400756101891, 1.64461212843615, 0.100049824102723, 0.527812470411869  
"2923", "RASSF5", 82.6693507648448, 0.470178788231412, 0.28607747625063, 1.64353654958663, 0.100271969647387, 0.528261248159425  
"2924", "FAM71A", 21.6652283618368, 1.016441007564, 0.618350642744894, 1.64379388861304, 0.100218784170924, 0.528261248159425  
"2925", "TNNI2", 2.44789024044533, -1.54343189186696, 0.938928899573033, -1.64382190447947, 0.100212995356807, 0.528261248159425  
"2926", "COTL1", 507.679233514771, -0.413652652041245, 0.251679282183555, -1.64357053330898, 0.100264944781102, 0.528261248159425  
"2927", "TPM2", 389.278325555195, -0.502398311893151, 0.305731515054013, -1.64326635350102, 0.100327836566912, 0.528374991690792  
"2928", "STXBP5", 87.450400197301, 0.482971672513744, 0.2939690137962, 1.64293394829896, 0.10039660015178, 0.528556554419291  
"2929", "NCK1", 283.590206576922, 0.267485234054023, 0.162873079932067, 1.64229247807918, 0.100529405213621, 0.529075036315453  
"2930", "ADCY3", 366.440224484364, 0.402039479070628, 0.244879639665288, 1.64178401936622, 0.100634772043432, 0.529123778073707  
"2931", "MFSD1", 151.755089348938, -0.334241417034719, 0.203572769752251, -1.64187684552061, 0.100615529310111, 0.529123778073707

"2932", "CTTN", 602.185584795715, -0.249994704223181, 0.152288582242978, -1.64158534107509, 0.100675967634783, 0.529123778073707  
"2933", "NAALAD2", 47.8551101937311, 0.510989279214081, 0.311271306424848, 1.64162024788961, 0.100668728795681, 0.529123778073707  
"2934", "C16orf70", 30.4368759154771, 0.480009429303283, 0.29246298530964, 1.64126557347106, 0.100742299100672, 0.529220957720922  
"2935", "TNRC6B", 936.996426936013, 0.341238285739418, 0.207924393822242, 1.64116523062296, 0.100763121045145, 0.529220957720922  
"2936", "PYGB", 117.757527846878, -0.393877908277785, 0.240038915861654, -1.64089188148473, 0.100819860576194, 0.529338607214585  
"2937", "AC023157.3", 18.7608990996534, -0.852419775714867, 0.519582453739798, -1.64058614677883, 0.100883352591159, 0.529491617362178  
"2938", "BAZ2B", 334.219679398604, 0.454341877952081, 0.277093063051905, 1.63967250911285, 0.101073277858706, 0.529521956345729  
"2939", "PTPRG-  
AS1", 8.5161409265168, 1.03874292681842, 0.63328969710652, 1.64023342170953, 0.100956642683873, 0.529521956345729  
"2940", "ACTRT3", 9.21542438320597, -0.876271044569071, 0.534504564320484, -1.63940797340632, 0.10112832218479, 0.529521956345729  
"2941", "NCOA4", 292.786466185825, 0.231780012301608, 0.141387091244933, 1.6393293776734, 0.101144680907104, 0.529521956345729  
"2942", "ATXN3", 288.706561154253, 0.32836444087158, 0.20024576115294, 1.63980719981776, 0.101045260722546, 0.529521956345729  
"2943", "RPLP1", 28712.1657246786, -0.389437133647831, 0.237477736303958, -1.63988902584693, 0.101028243037006, 0.529521956345729  
"2944", "C17orf53", 2.84510083175656, -1.55346014704535, 0.947768170484423, -1.63907186949668, 0.101198292792379, 0.529521956345729  
"2945", "PIAS2", 104.730216721989, 0.410522251236867, 0.25039376447377, 1.63950668699608, 0.101107779167257, 0.529521956345729  
"2946", "ARHGAP35", 168.734047769019, 0.300260751095672, 0.183183920806416, 1.63912176229146, 0.10118790360011, 0.529521956345729  
"2947", "CDHR4", 7.77565287592732, -1.01068976227077, 0.616748440342045, -1.63873906468292, 0.101267614580756, 0.529583764573203  
"2948", "CCND2-  
AS1", 12.586927580346, -0.823567934601206, 0.502578457457672, -1.63868530849349, 0.101278815307285, 0.529583764573203  
"2949", "RGS10", 338.886474158842, -0.471504965276507, 0.287815716248301, -1.63821827182549, 0.10137616935414, 0.529913072429323  
"2950", "TRMT1L", 73.3781914752071, 0.36539632678351, 0.223127420083339, 1.63761283416908, 0.101502484076508, 0.530393488826906  
"2951", "EPB41L5", 36.7005831696704, 0.470035168573681, 0.287072093065924, 1.63734190792883, 0.101559049006956, 0.530509230919088  
"2952", "FAM222B", 63.3454207339168, 0.446455048338287, 0.272835096591383, 1.6363549041747, 0.101765331428107, 0.531406701884915  
"2953", "LURAP1L", 207.735119663003, 0.460708475388587, 0.28167399883131, 1.63560881480046, 0.101921484344682, 0.532041883228335  
"2954", "TPMT", 46.6461309891919, -0.456205707883907, 0.279110899141278, -1.6344962138257, 0.10215470059711, 0.533078777828183  
"2955", "ASB16-  
AS1", 26.3517906792192, 0.587535642634528, 0.359710720175747, 1.6333559432



0756,0.102394157252368,0.53414752421159  
"2956","FOXF2",46.0336369544003,0.581393657994779,0.356030881568509,1.63298659777327,0.102471815425482,0.534191083795674  
"2957","CUL9",31.9698038080676,0.463029500680574,0.283519741915014,1.633147298855,0.102438020832309,0.534191083795674  
"2958","CAMK2D",469.520619065404,0.380529266083893,0.233102752796984,1.63245290550175,0.102584111754903,0.534545114605944  
"2959","TIGD7",13.2839411599395,0.728783030755738,0.446466775558144,1.63233429821213,0.102609081681413,0.534545114605944  
"2960","AC004846.1",18.5929059445621,-0.578947948092238,0.354776532699256,-1.63186652647911,0.102707606965996,0.534877622088118  
"2961","SULF2",124.574070539947,0.566717265254921,0.347365231686487,1.63147377330616,0.102790389431934,0.535127947684316  
"2962","KIAA1549",7.09095284184361,1.03661586830996,0.635663480986057,1.63076202946555,0.102940542308253,0.535407833733371  
"2963","ANK1",18.1502843930285,-0.856541385659412,0.525247550571331,-1.63073846746686,0.10294551604118,0.535407833733371  
"2964","LTBP4",2643.3309548071,0.486136684117675,0.298110761642695,1.63072504138693,0.102948350255317,0.535407833733371  
"2965","ARID1A",236.027183000432,0.347273864499179,0.21320814701498,1.62880203857679,0.103354933019962,0.53615136355628  
"2966","ZNRANB2-  
AS2",5.87572618874887,1.40105222261094,0.859727550768616,1.62964676583688,0.103176174396009,0.53615136355628  
"2967","ANKRD36B",83.4311274729237,-0.679251359403241,0.416813317319794,-1.62962969554568,0.103179784324132,0.53615136355628  
"2968","RSRC1",353.8293147858,-0.261170322591672,0.160407839654677,-1.62816432883776,0.103490046249047,0.53615136355628  
"2969","BASP1-  
AS1",3.81075050396438,-1.66361316140595,1.0218274624614,-1.62807638522319,0.103508690103373,0.53615136355628  
"2970","SH3BGR2",28.1798796571208,0.567794383229254,0.348585752343125,1.62885137849913,0.103344485089036,0.53615136355628  
"2971","CCDC170",12.2362641772013,1.01825072849533,0.62525097228323,1.62854721325259,0.103408906695657,0.53615136355628  
"2972","IQUB",6.09207161736831,-1.08670522134402,0.66733183408594,-1.62843306109097,0.103433092137957,0.53615136355628  
"2973","RIN1",22.4446279597645,-0.749500961470906,0.460284789790534,-1.62834179641693,0.103452431637827,0.53615136355628  
"2974","ITGAE",246.600620256158,-0.423730596168521,0.260242199514641,-1.62821631910117,0.103479025682195,0.53615136355628  
"2975","OCEL1",124.326555634469,-0.479801029410661,0.294456315277047,-1.62944723722168,0.103218375846642,0.53615136355628  
"2976","AURKC",7.07405645341378,1.01329466082162,0.622127039285655,1.62875843169446,0.103364167655151,0.53615136355628  
"2977","AC132192.2",8.0927906038346,-0.900966027114689,0.55376511843084,-1.62698226581639,0.103740864314729,0.537173471082148  
"2978","RFC2",82.5371738173645,-0.447523471050181,0.275094938486726,-1.62679645620516,0.103780334544348,0.537197399933219  
"2979","PAFAH1B3",26.5781604533692,-0.764850203662241,0.47030808528831

, -1.62627483470408, 0.103891202709509, 0.537590765279317  
"2980", "MIR1915HG", 3.27560032070981, 1.60662210134569, 0.98816891480436,  
1.6258577630564, 0.103979916990455, 0.537869268593241  
"2981", "ECM2", 1118.03707768032, 0.334971102866278, 0.20608334127127, 1.62  
541572161988, 0.104074008223621, 0.538175389723959  
"2982", "PLEK", 20.7817427429927, -1.02312197483233, 0.629699071627712, -1.  
6247792333706, 0.104209607464664, 0.53843907351948  
"2983", "JADE2", 97.093545723245, 0.352257030005792, 0.216774247245818, 1.6  
2499482517561, 0.104163661468732, 0.53843907351948  
"2984", "NUFIP1", 56.4221764843399, 0.38273867375055, 0.235577221027127, 1.  
62468456025499, 0.104229788866826, 0.53843907351948  
"2985", "UFC1", 560.575471279299, -0.400677479128938, 0.246725399693984, -1.  
.62398147748834, 0.104379761738373, 0.538481540911955  
"2986", "DISC1", 23.3311382659359, 0.741328037031424, 0.456446326162323, 1.  
62412970494101, 0.104348129452508, 0.538481540911955  
"2987", "CYTIP", 18.4565336304476, -0.642967146374552, 0.396037631790505, -  
1.62350012918638, 0.104482535768255, 0.538481540911955  
"2988", "SGMS2", 198.679634684769, 0.350867925981782, 0.215996123092027, 1.  
62441770231354, 0.104286691517537, 0.538481540911955  
"2989", "CSNK2B", 623.153614202761, -0.356640946462295, 0.219661960671232,  
-1.62358992595936, 0.104463356911555, 0.538481540911955  
"2990", "GOLGA8B", 23.9827145713802, -1.01879067349589, 0.62750263926162, -  
1.62356396571448, 0.104468901231238, 0.538481540911955  
"2991", "THRA", 293.237175218285, 0.320205080061352, 0.197154595694323, 1.6  
2413196067624, 0.104347648129102, 0.538481540911955  
"2992", "SOCS3", 6721.00469746152, -0.41012964248538, 0.25271891267549, -1.  
6228688155683, 0.104617451114305, 0.538996660737639  
"2993", "MANBA", 120.135187982789, 0.43050879226292, 0.26535267040032, 1.62  
240233577993, 0.104717229366898, 0.539315884245516  
"2994", "AL442128.2", 6.79272672405887, -0.940168345437032, 0.579545161919  
74, -1.62225208182695, 0.104749384199226, 0.539315884245516  
"2995", "ANKFY1", 178.05797340552, 0.290708679343542, 0.179220250009061, 1.  
62207495709243, 0.104787299532673, 0.539330959030437  
"2996", "NBEAL1", 316.456417902721, 0.355407228177644, 0.219245544976991, 1.  
.62104652213089, 0.105007661736571, 0.539744283317521  
"2997", "CHL1-  
AS2", 30.023010984496, 0.80867034802374, 0.49885544192204, 1.6210514711596  
9, 0.105006600430728, 0.539744283317521  
"2998", "C5orf49", 4.73700505018496, -1.16253331813611, 0.717140871033918,  
-1.62106688531092, 0.105003294962234, 0.539744283317521  
"2999", "TMEM106C", 302.943978436213, 0.574874444021859, 0.354587775569761  
, 1.62124721614595, 0.104964630275566, 0.539744283317521  
"3000", "ROR1-  
AS1", 3.77331484471177, -2.01401661415762, 1.24337956165625, -1.6197922792  
577, 0.105276905355968, 0.539803550493732  
"3001", "CPOX", 53.864729187266, 0.410460855214764, 0.25324487055171, 1.620  
80619568147, 0.105059209340342, 0.539803550493732  
"3002", "AFF1", 353.235794698019, 0.428734084165837, 0.264664585956447, 1.6  
1991481639477, 0.105250576644515, 0.539803550493732  
"3003", "STK32A", 11.1844980952819, -1.22210937365618, 0.754443571013718, -

1.61988175207601,0.105257680432349,0.539803550493732  
"3004","SERINC1",1013.47582047407,0.264303244919932,0.163152702017347,  
1.61997467189866,0.105237717804036,0.539803550493732  
"3005","SCAI",57.7963361556057,0.454378989607959,0.280563123995774,1.6  
1952498652247,0.105334354841722,0.539803550493732  
"3006","CCL13",10.7472423049333,-1.03703930995881,0.640191093875663,-1  
.61989024820801,0.105255855022893,0.539803550493732  
"3007","CXXC1",95.3782447978255,-0.324537550114468,0.200376031025621,-  
1.61964257128624,0.105309079170858,0.539803550493732  
"3008","ZNF431",112.932825964723,0.414921359884183,0.256032018397725,1  
.62058387259845,0.105106913285714,0.539803550493732  
"3009","SLC19A2",178.650476762499,0.672383229398929,0.415585783243171,  
1.61791682129198,0.105680524618596,0.539859603032118  
"3010","HPS3",80.7512820175392,0.35193874991212,0.217353965852095,1.61  
919635803474,0.105405021372093,0.539859603032118  
"3011","RNF139",288.021606283475,0.277597416736937,0.171568454083067,1  
.61799800680453,0.105663027217426,0.539859603032118  
"3012","RAD23B",459.720834846745,0.305476658265923,0.18877331498494,1.  
61821949405451,0.105615303155567,0.539859603032118  
"3013","PAXX",187.629131539732,-0.367174562588074,0.226826508079793,-1  
.61874626425457,0.105501868193476,0.539859603032118  
"3014","HERC4",191.231704306783,0.280581246990302,0.173364347855764,1.  
61844837453973,0.105566004034227,0.539859603032118  
"3015","ATF7IP",234.215268317593,0.349431005107367,0.215827895439202,1  
.61902614301218,0.105441638294887,0.539859603032118  
"3016","PIGL",50.4963451761558,0.392710194884465,0.242628576940513,1.6  
1856529777508,0.105540826702117,0.539859603032118  
"3017","RASD1",1641.0403299635,0.565464589643031,0.349516662827847,1.6  
178473010929,0.105695509695163,0.539859603032118  
"3018","SLC39A6",280.362817770181,0.334175750773886,0.206520760870254,  
1.61812182642417,0.105636345581714,0.539859603032118  
"3019","NPC1",48.8895059387043,0.462937772333982,0.28626651875015,1.61  
715653774387,0.105844495307363,0.540441502207024  
"3020","UQCRH",1199.74795659966,-0.396959053364887,0.245524481707546,-  
1.61677992599419,0.105925794032915,0.540443036409975  
"3021","BPNT1",40.0155958175974,0.429710265635817,0.26579995235353,1.6  
1666795584777,0.105949974442487,0.540443036409975  
"3022","POLR1D",586.413665487867,-0.307827289832546,0.190382035675833,  
-1.61689252213212,0.105901482851704,0.540443036409975  
"3023","MEG9",11.2944935780168,1.26205196889511,0.780764246354541,1.61  
64315602152,0.106001039420561,0.54052465189148  
"3024","SOX4",1569.13534812553,0.540319194916441,0.334354955340313,1.6  
1600474671145,0.106093286927569,0.540802749632799  
"3025","FBXL6",35.0935983347183,-0.509030611990001,0.315022524838707,-  
1.61585465118924,0.106125742305496,0.540802749632799  
"3026","C2orf69",116.522987268159,-0.398992154936351,0.246960288683911  
, -1.61561260339726,0.106178097243954,0.540890736621135  
"3027","AL031118.1",3.97434038623712,-1.23995746558132,0.7678020190561  
7, -1.61494426272225,0.106322765684213,0.54144877205885  
"3028","LRIG2",67.1226886768249,0.43414914971869,0.269088514146523,1.6

1340646997028,0.106656228425301,0.541561054728419  
"3029","ZNF692",30.1139836601616,-0.531121329552352,0.32918898584358,-  
1.61342375472041,0.106652475712086,0.541561054728419  
"3030","SAP130",38.3688772619389,0.481361830840576,0.29837564099584,1.  
61327455965914,0.106684871081173,0.541561054728419  
"3031","RNF175",2.62831995950816,-1.54618666555601,0.95820681803962,-1  
.6136251970314,0.106608748042391,0.541561054728419  
"3032","FER",183.839703861819,0.380485083356099,0.235668486662733,1.61  
449283586488,0.106420569542285,0.541561054728419  
"3033","TPST1",522.281459945749,0.420918368077225,0.26069217726437,1.6  
1461833068496,0.106393373314858,0.541561054728419  
"3034","AC083862.2",18.7181235892038,0.637278404368397,0.3949451211204  
26,1.61358723095627,0.106616988362092,0.541561054728419  
"3035","RPS13",11763.5028048877,-0.411223373833384,0.254809870788111,-  
1.61384397143445,0.106561274143062,0.541561054728419  
"3036","RFX7",47.8869838557038,0.449722153162633,0.278772518743448,1.6  
1322269207069,0.106696135141759,0.541561054728419  
"3037","ADAMTS7",55.9701756943117,-0.376635260639517,0.233388273974335  
, -1.6137711386517,0.106577076947206,0.541561054728419  
"3038","KMT2A",608.638890540993,0.338481356224185,0.209969543738071,1.  
61204977730688,0.106951108256517,0.542497970968811  
"3039","ATRN",104.037125168036,0.320451962471253,0.198768910653895,1.6  
1218352214667,0.106922009879314,0.542497970968811  
"3040","DYRK2",183.775515906934,-0.49902496798192,0.309594132246307,-1  
.61186830112434,0.1069906014009,0.542519776511472  
"3041","LINC00342",362.116201005388,-0.569113186864852,0.3531163192825  
34,-1.61168758221422,0.10702994122825,0.542540790540436  
"3042","RSRP1",1004.58901696467,0.287072111654787,0.178237662578729,1.  
61061420746575,0.107263835236289,0.542797735546003  
"3043","FAM76A",175.64783234847,-0.34964781185115,0.217215870713662,-1  
.60967893691369,0.107467965545663,0.542797735546003  
"3044","AC104506.1",12.1029414775775,-0.797256905353486,0.495257643724  
009,-1.60978213149552,0.107445427409799,0.542797735546003  
"3045","CREG1",553.250465804889,0.252696152511241,0.156916452700272,1.  
61038659849084,0.107313484423059,0.542797735546003  
"3046","CSRP1",314.089550296332,-0.415816762485776,0.258139400127873,-  
1.61082253340558,0.10721840827965,0.542797735546003  
"3047","PTH2R",2.4290009337589,1.73070451390307,1.07448369185178,1.610  
73130009106,0.10723830047838,0.542797735546003  
"3048","SLC35A5",96.0859400486565,0.309776177990688,0.192407390018775,  
1.61000145555979,0.107397538534035,0.542797735546003  
"3049","GTF3C6",364.320152454569,-0.416426930314529,0.258664401573131,  
-1.60991202415921,0.107417063621068,0.542797735546003  
"3050","FAN1",55.1360750505405,0.41547608358883,0.25805896577638,1.610  
00445126506,0.107396884546131,0.542797735546003  
"3051","DLX3",3.85848759156721,-1.39224054541611,0.864315854865935,-1.  
61080065531375,0.107223178237242,0.542797735546003  
"3052","SNRPB",553.096734432075,-0.397649031570521,0.247002227515195,-  
1.60990058903845,0.107419560393517,0.542797735546003  
"3053","S100A2",7.20387523709683,-0.931905552589701,0.579186046891645,

-1.60899171793074,0.107618152604265,0.543022527788785  
"3054","RAB4A",406.008463757689,-0.292583440254114,0.181815859788955,-  
1.60922947312591,0.107566174022251,0.543022527788785  
"3055","ZNF418",2.36232904756024,1.79719563942483,1.11687302343823,1.6  
0913156796666,0.107587575862718,0.543022527788785  
"3056","MRPS18C",338.857258510997,-0.406018177439816,0.252539477516991  
,-1.60774141703251,0.1078918236338,0.543180883256939  
"3057","MED10",428.633204636199,-0.285068789156862,0.177312299495685,-  
1.60772146076533,0.10789619620712,0.543180883256939  
"3058","AC008883.3",3.35191827041346,1.41412778183273,0.87946729367664  
7,1.60793674989426,0.107849032091322,0.543180883256939  
"3059","PTAR1",126.862851241927,0.369068832478347,0.229434211452065,1.  
60860418392946,0.107702918799652,0.543180883256939  
"3060","CDT1",8.39859764044978,0.946400725923204,0.588479836142458,1.6  
0821266558078,0.107788610177246,0.543180883256939  
"3061","ZADH2",143.908932762324,0.296550011157871,0.184406909867595,1.  
60812852062211,0.10780703397766,0.543180883256939  
"3062","C19orf44",26.4826428803617,0.654065451613087,0.40676757058721,  
1.60795869412323,0.107844225611856,0.543180883256939  
"3063","ABCD3",95.6164569642727,-0.304414319526298,0.189433517394088,-  
1.60697179524471,0.108060555399076,0.543676983980753  
"3064","PBLD",34.0297721350015,0.482212975344675,0.300109609958747,1.6  
067895173732,0.108100548550179,0.543676983980753  
"3065","POLI",71.8308820818252,0.399068012970716,0.24836092160216,1.60  
680678101996,0.108096760272611,0.543676983980753  
"3066","PTCD3",144.487477807314,0.317411191305504,0.19758269421064,1.6  
0647263452697,0.108170102943362,0.543849359710346  
"3067","GLMP",210.53190205451,0.388276703964627,0.241742563519824,1.60  
615779989768,0.108239242835879,0.544019539717991  
"3068","CPE",3920.20001186186,0.43800786741508,0.272741880234737,1.605  
94283150833,0.10828647149217,0.544079516966034  
"3069","ZNF589",41.0662327665487,0.457335947847741,0.284930548713562,1.  
60507867588286,0.108476491463896,0.54449753085592  
"3070","TLR2",5.15558910476305,-0.996809659762872,0.621067748382235,-1.  
60499343647996,0.108495249121589,0.54449753085592  
"3071","CACNB2",3.19968678543811,1.60484506821402,0.999952026919217,1.  
60492206126971,0.108510957819616,0.54449753085592  
"3072","NUDT11",20.4879157084183,-0.774587634098978,0.482537097560348,  
-1.60523955156029,0.108441096390682,0.54449753085592  
"3073","SEC61G",963.751776928103,-0.402973169649653,0.251204619935908,  
-1.60416305142982,0.108678116746721,0.544981512573424  
"3074","AC073578.1",4.6612425935089,1.20900353312586,0.753613855471852  
1,1.60427455565938,0.10865354709069,0.544981512573424  
"3075","ST5",239.43008031789,0.279832528042644,0.174515892076433,1.603  
47877040382,0.108828992490751,0.545206018604137  
"3076","VPS13C",446.021393692021,0.297835890142516,0.185710822123332,1.  
60376162647495,0.108766606049267,0.545206018604137  
"3077","AC009120.2",31.8623587298048,0.656885459357516,0.4096623458228  
82,1.60348019791285,0.108828677569793,0.545206018604137  
"3078","C1QBP",483.548024658986,-0.368751606668326,0.229996773840318,-

1.60329034408258,0.108870567310613,0.545237100420112  
"3079","ELL3",5.24212356027831,1.21470976023519,0.757907241189113,1.60  
271560188472,0.108997457364233,0.545518118594043  
"3080","AC007216.3",6.91136095530143,1.17075897912702,0.73043381370649  
1,1.60282691895951,0.108972871947524,0.545518118594043  
"3081","BCAP29",341.90432329193,-0.290979006947,0.181580970607235,-1.6  
0247522619755,0.109050561546286,0.545606753078868  
"3082","LNPEP",285.382404384997,0.335652910508342,0.209491841459267,1.  
60222425928508,0.109106027390406,0.545650737316779  
"3083","CD6",5.56698034620795,1.23590056744993,0.771418061961864,1.602  
11515440383,0.109130147463356,0.545650737316779  
"3084","PELI2",88.9783684133792,-0.501983135687314,0.313400937684359,-  
1.60172825070768,0.109215715165578,0.545838511490134  
"3085","NUMB",218.289774357141,0.336200097684087,0.209911847013454,1.6  
0162517012458,0.109238521436722,0.545838511490134  
"3086","LING01",2.4588195264981,-2.0359847532636,1.27163727766175,-1.6  
0107350502285,0.109360639704003,0.546113860649519  
"3087","SNHG30",98.9754595154056,-0.483124880363837,0.301753863231599,  
-1.6010561561329,0.109364481856962,0.546113860649519  
"3088","TINF2",183.617402612227,-0.299853666144548,0.187343555510077,-  
1.60055500883466,0.10947551397083,0.5464912719755  
"3089","C11orf53",8.70059786997808,-1.22731953855752,0.7670624318473,-  
1.60002561408436,0.109592901244317,0.546602717141023  
"3090","ZMYND15",5.45645795748334,-1.03813924096473,0.648816721726105,  
-1.60005006992248,0.109587476248847,0.546602717141023  
"3091","PRR5",88.828676239235,-0.446103751088319,0.278819269346532,-1.  
59997460768709,0.10960421658663,0.546602717141023  
"3092","SCAANT1",3.89601008834952,-1.51472377735958,0.947081143333764,  
-1.59936008442496,0.109740616027546,0.546990175699883  
"3093","GARS",220.455621149626,-0.315086053789968,0.197014377727297,-1.  
59930487015574,0.109752877939652,0.546990175699883  
"3094","COL9A2",2.59109888773182,-1.58412820183152,0.991449707126132,-  
1.59778977233587,0.110089771592519,0.547191524194872  
"3095","MAN1A2",311.245410480655,0.24874537956074,0.155773870507386,1.  
59683635484261,0.110302189816388,0.547191524194872  
"3096","AC092803.1",26.2361479261002,-0.715300095325888,0.447744012621  
69,-1.59756484768511,0.110139854897456,0.547191524194872  
"3097","TMEM63A",58.781422407394,0.531068538776318,0.332502642728225,1.  
59718591833988,0.110224270678473,0.547191524194872  
"3098","AC007389.1",2.80600131003394,1.48435660272921,0.92868641891599  
9,1.59833994822688,0.109967341395531,0.547191524194872  
"3099","RPS14",17047.694279757,-0.407449250117388,0.255130636493078,-1.  
59702204218992,0.110260793928565,0.547191524194872  
"3100","MICU3",121.198699168176,0.469703874230347,0.293951906397728,1.  
59789361459293,0.110066655417308,0.547191524194872  
"3101","TOX",3.33917826984551,1.77080841505372,1.10874599160951,1.5971  
2723063209,0.110237349371029,0.547191524194872  
"3102","CPT1A",167.652781957177,0.401456002692349,0.251355829350093,1.  
5971620937949,0.110229579886069,0.547191524194872  
"3103","KITLG",220.063338140324,-0.40395651170415,0.252823543842598,-1

.59778043438725,0.110091850487769,0.547191524194872  
"3104","NSRP1",357.693690999818,-0.288582209108445,0.180600717069244,-  
1.59790179015623,0.110064835629812,0.547191524194872  
"3105","PEX12",20.0392549086763,0.608599725688016,0.380827163621942,1.  
59809956805547,0.110020819760074,0.547191524194872  
"3106","AL118522.1",10.3034642704163,-1.12669670877664,0.7056705684120  
13,-1.59663270541675,0.110347604164146,0.547191524194872  
"3107","GABPA",180.187287058132,0.296533933509614,0.185493992064965,1.  
59861745498344,0.109905628873939,0.547191524194872  
"3108","DDX3X",1371.11072982594,0.348707763999183,0.218284397158914,1.  
59749285124268,0.110155889934484,0.547191524194872  
"3109","HAUS7",40.3040434120699,-0.575384480080653,0.36038752244993,-1  
.59657159096176,0.110361235726361,0.547191524194872  
"3110","SLX4IP",29.0221590470401,0.510285263679578,0.319709788258991,1  
.5960889607365,0.11046893299994,0.547549389773014  
"3111","INAFM1",157.190484737533,-0.348068007394218,0.218159001282678,  
-1.5954785516423,0.110605262554758,0.548048898194019  
"3112","EFCAB1",3.00523407370136,-1.37101295560064,0.860089304096816,-  
1.59403558336346,0.110928065256093,0.549118858677802  
"3113","AC068888.1",162.156545904165,-0.375059014044637,0.235258862550  
387,-1.59423968125455,0.110882361933866,0.549118858677802  
"3114","PGK1",571.653678159345,-0.353320220650067,0.221631449261881,-1  
.59417908345932,0.11089592995152,0.549118858677802  
"3115","RPS7",8060.10887308954,-0.443939476354071,0.278685612003963,-1  
.59297594576845,0.111165587349892,0.549412481243536  
"3116","AC044849.1",28.6415072057744,-0.524191069987183,0.329012063952  
252,-1.59322750567364,0.111109162861819,0.549412481243536  
"3117","PLAAT3",554.704996069626,-0.405755299351969,0.254678543351947,  
-1.59320567022109,0.111114059623044,0.549412481243536  
"3118","C1RL-  
AS1",49.2315089950538,0.69468518460172,0.436056535106117,1.59310806896  
327,0.111135949507283,0.549412481243536  
"3119","SLC38A10",277.552964491093,0.278905980032033,0.175078357402995  
,1.59303516533485,0.111152302459903,0.549412481243536  
"3120","AC159540.2",14.5267575591667,-0.736967896848206,0.462736452630  
966,-1.5926298709731,0.111243248336295,0.549620087533329  
"3121","SYT11",48.9122640120194,0.477918506976825,0.300220504909694,1.  
59189162352712,0.111409058012162,0.549899612923874  
"3122","SPAST",77.3413464093149,0.384605298696798,0.24158736564515,1.5  
9199260139173,0.111386366972141,0.549899612923874  
"3123","DCUN1D4",89.5830517855427,0.346344711202594,0.217628783448075,  
1.59144716850025,0.111508976207022,0.549899612923874  
"3124","COL28A1",3.8193235468479,-1.18866812433611,0.746735831494725,-  
1.59181878544221,0.111425427942148,0.549899612923874  
"3125","RECQL",328.871250111344,-0.330002709709398,0.207324199879215,-  
1.59172305935175,0.111446944702919,0.549899612923874  
"3126","CAND1",243.942256864548,0.276511427075037,0.173750789612069,1.  
59142544153267,0.111513862471621,0.549899612923874  
"3127","C1QTNF3",161.029313341807,0.489380371424907,0.307558647313382,  
1.59117740860091,0.111569655563779,0.549997028767272

"3128", "MPP5", 65.8475731724386, 0.412608131085697, 0.259335531457467, 1.59102043891493, 0.111604976061241, 0.549997028767272  
"3129", "ZFH2-  
AS1", 16.2892329624929, 0.857731144281707, 0.539271475145703, 1.59053683314134, 0.111713849967065, 0.550357621362196  
"3130", "YIF1A", 446.015125059776, -0.405471091742925, 0.254967987923289, -1.59028235287685, 0.111771174610089, 0.550464107544578  
"3131", "NICN1", 22.4292954994998, 0.652385927463861, 0.410281763355328, 1.59009243337695, 0.111813971309142, 0.550498999594512  
"3132", "CLEC4A", 3.67112991402798, -1.25604171109288, 0.79023602636024, -1.58945134009911, 0.111958531550108, 0.550683077168128  
"3133", "TIMP2", 6595.61151507241, 0.21049141516052, 0.132424522103605, 1.5895199153208, 0.111943061473185, 0.550683077168128  
"3134", "ARHGEF1", 113.916642096395, -0.305950256451923, 0.192479821137348, -1.58951860327013, 0.111943357446558, 0.550683077168128  
"3135", "THRB-  
AS1", 5.01733411515106, -1.07859182614388, 0.678727860788036, -1.58913739726491, 0.112029376329007, 0.550855769094625  
"3136", "SLC1A4", 10.92186088403, -0.774147590720941, 0.487263623138782, -1.58876541149153, 0.112113364921279, 0.551092959267067  
"3137", "EIF3H", 1087.31732860502, -0.363665156981228, 0.228921652726339, -1.58860095866932, 0.11215051163293, 0.551099820472303  
"3138", "FGL2", 1105.04731468964, -0.43190613906153, 0.271943964783769, -1.58821740870385, 0.112237185870027, 0.551349974565479  
"3139", "MYO1B", 199.958303704363, 0.400299684233955, 0.25220495807072, 1.58719990001826, 0.112467377418298, 0.551426406775782  
"3140", "MSL2", 67.1365714217834, 0.410929955016408, 0.258867111242013, 1.58741662100224, 0.11241831734016, 0.551426406775782  
"3141", "KIAA1958", 5.02423272494037, 1.35795994631419, 0.855326378810662, 1.58765119369105, 0.112365235110683, 0.551426406775782  
"3142", "ABI1", 247.646493441807, 0.315185449677226, 0.198559841714562, 1.58735747850927, 0.112431704010914, 0.551426406775782  
"3143", "PLBD1-  
AS1", 9.45403806928852, 0.874193888319997, 0.550663131131801, 1.58752936032458, 0.112392802718867, 0.551426406775782  
"3144", "CCDC117", 91.2818900124515, 0.332485046099968, 0.209393595267988, 1.58784725805221, 0.112320882222628, 0.551426406775782  
"3145", "DNAH5", 7.68228954286581, -0.900153116270183, 0.567369382985326, -1.58653805310017, 0.112617307098918, 0.551985942426018  
"3146", "PARD3B", 174.365493519296, 0.393348190099657, 0.248023860581314, 1.58592882627395, 0.112755455857239, 0.552136388830793  
"3147", "HMBX1", 111.158763554344, 0.454577127450324, 0.286628831371314, 1.58594348403647, 0.112752130483856, 0.552136388830793  
"3148", "ZNF623", 52.0828205224292, 0.429010533443096, 0.270475216252208, 1.58613620644289, 0.112708415177565, 0.552136388830793  
"3149", "ADCY9", 85.6181702402667, 0.360157970138134, 0.227160575063054, 1.58547745372701, 0.112857895572428, 0.55228713023777  
"3150", "CD320", 118.301611121128, -0.50754694754975, 0.320097110296159, -1.5856030286564, 0.112829388781204, 0.55228713023777  
"3151", "SCAF11", 832.445326205352, 0.269799933610452, 0.170212960456124, 1



.58507279873085,0.112949795007991,0.552561437654136  
"3152","METTL14",108.134643174214,0.361819682372633,0.228418467630226,  
1.58402114385236,0.113188907577235,0.55262911727399  
"3153","MRPL22",283.357810844643,-0.436710771252698,0.275667049119673,  
-1.58419648865292,0.113149012114448,0.55262911727399  
"3154","USP47",267.12016880348,0.291191398430359,0.183782351335844,1.5  
8443613499229,0.113094504314291,0.55262911727399  
"3155","TPT1-  
AS1",196.648810877385,0.356515593148824,0.225036942184622,1.5842536327  
0505,0.113136012763409,0.55262911727399  
"3156","AC027807.2",6.32269461374099,1.18893020056273,0.75063068579373  
6,1.58390833610209,0.11321458010712,0.55262911727399  
"3157","LINC00205",34.92324604353,0.620627128177714,0.39183201494538,1  
.58391122855091,0.113213921792928,0.55262911727399  
"3158","UFD1",305.576192865253,-0.375052896536593,0.236786363638224,-1  
.58392945765078,0.113209772964317,0.55262911727399  
"3159","ELOVL4",35.3178934584151,-0.508190632827939,0.320934117403084,  
-1.58347338369659,0.113313608529319,0.552762428949192  
"3160","ROM01",624.936088789268,-0.383264724696569,0.24203872961334,-1  
.58348511128297,0.113310937539129,0.552762428949192  
"3161","PGM1",179.32918981568,-0.331302996371877,0.209304899842871,-1.  
58287262563176,0.113450499200653,0.553069134992938  
"3162","ZNF382",3.58812168040059,1.32873723939795,0.839524928505554,1.  
58272517501445,0.113484117676462,0.553069134992938  
"3163","NBDY",316.022049635793,-0.374710428026606,0.236712741506685,-1  
.5829753212335,0.113427089422968,0.553069134992938  
"3164","ST7-  
AS1",31.0104254801329,-0.601106121040237,0.379835364338038,-1.58254385  
314496,0.113525469494324,0.553095800333441  
"3165","AC092164.1",18.634668009259,0.648144087959328,0.40969240888914  
1,1.58202611006812,0.11364361003178,0.553321619911527  
"3166","SOX15",22.8776030396342,-0.532739563728456,0.336745028788556,-  
1.58202651319009,0.113643518008262,0.553321619911527  
"3167","BDNF",10.4153103731146,-0.997505357072579,0.630610378424782,-1  
.58180929334572,0.113693112832209,0.55338785421803  
"3168","UBE4A",152.321870189101,0.282994558487105,0.1789314796431,1.58  
158060868647,0.113745343676766,0.553467320952446  
"3169","EXOC2",47.4032079464536,0.410674938699964,0.259738511809304,1.  
58110915412296,0.113853082023901,0.553816743262366  
"3170","HSPA8",1505.20421018181,-0.405124262394792,0.256261088718712,-  
1.58090432074719,0.113899916253888,0.553869782035861  
"3171","TIMM10",228.780564208943,-0.397118848230408,0.251266298190024,  
-1.58047000768118,0.113999270164271,0.55389253733908  
"3172","STAT2",253.283473764563,0.458933812102136,0.290362102997208,1.  
58055685423435,0.113979397600016,0.55389253733908  
"3173","GPCPD1",135.775235317487,0.415503825404581,0.262908437329123,1  
.58041266999899,0.114012391889517,0.55389253733908  
"3174","EFCC1",3.49529794129096,-1.46864987859247,0.929374877834701,-1  
.58025562517269,0.114048337677794,0.553892604065279  
"3175","MYOSLID",2.36088440415957,-1.6754061127791,1.0605831017382,-1.

57970281634061,0.114174940366427,0.553934912411227  
"3176","SPSB3",275.699388625419,-0.289484592803737,0.183283844789469,-  
1.57943321811181,0.114236723097975,0.553934912411227  
"3177","ZNF559",79.2664215479471,0.359423542508324,0.227537880885705,1  
.57962068166077,0.114193760050819,0.553934912411227  
"3178","BTBD3",37.306199416141,0.453438288675774,0.287008732883039,1.5  
7987627805234,0.114135202758753,0.553934912411227  
"3179","PLA2G6",20.8195914078374,0.611098848497624,0.386909815642541,1  
.57943485481952,0.114236347940934,0.553934912411227  
"3180","MICOS10",989.557800256018,-0.379147213449989,0.240261920368305  
, -1.57805786646832,0.114552316517938,0.553945142551517  
"3181","AGO3",246.941828725763,0.413468370602813,0.261909867753361,1.5  
786663883078,0.114412540764276,0.553945142551517  
"3182","FNDC4",145.769328443523,-0.527402412374004,0.334202192849812,-  
1.57809381164358,0.114544059678838,0.553945142551517  
"3183","AC011346.1",12.8034349565577,0.824369024765528,0.5222955907465  
07,1.57835723557856,0.114483563790312,0.553945142551517  
"3184","BEND7",70.4094933728368,-0.458228907598363,0.290383183322624,-  
1.57801461625709,0.114562251991842,0.553945142551517  
"3185","RASSF8",292.19492581537,-0.322985194936728,0.204676295788346,-  
1.57802931547444,0.114558875199539,0.553945142551517  
"3186","C16orf91",79.2835147111992,-0.455761045861018,0.28867527047167  
4,-1.57880183195581,0.11438151828538,0.553945142551517  
"3187","AC087393.2",2.96206280025146,1.65809503665843,1.05016964840215  
,1.57888303016684,0.114362889087062,0.553945142551517  
"3188","KCNK6",26.776804331882,-0.748308195161269,0.473995404064227,-1  
.57872457991148,0.114399244336935,0.553945142551517  
"3189","TENT5A",944.581475336706,-0.337216074537033,0.213740573393848,  
-1.57768863993671,0.114637157356757,0.554133515413739  
"3190","ABHD1",5.06005040383731,-1.00416989229264,0.637056390150629,-1  
.57626531625435,0.11496467129547,0.554393089237149  
"3191","MSX1",811.894139056118,-0.3653975794847,0.231807583105857,-1.5  
7629692087268,0.114957390931735,0.554393089237149  
"3192","AC058791.1",100.276331723526,-0.720399303119183,0.456919052789  
279,-1.57664535703092,0.11487715005643,0.554393089237149  
"3193","PPP3CB-  
AS1",2.56787357591307,1.67115006108995,1.05989116559134,1.576718549359  
34,0.114860300298856,0.554393089237149  
"3194","WBP1L",232.387209753869,0.378427638306976,0.239945469551653,1.  
57714016861448,0.114763276313027,0.554393089237149  
"3195","FXD2",3.04527817084231,-1.28937619023216,0.817495158693033,-1  
.57722792180634,0.114743090457701,0.554393089237149  
"3196","AP000866.1",9.79420925637482,0.848639236154739,0.5384066486403  
39,1.5762049712756,0.114978573226803,0.554393089237149  
"3197","AL627171.2",137.139471866005,0.557369264973123,0.3535972367873  
06,1.5762828636254,0.114960629080568,0.554393089237149  
"3198","TGFB1",116.297024312783,-0.571913252421969,0.362968198622416,-  
1.57565664042351,0.115104955163167,0.55469980403453  
"3199","SCAPER",121.633210322014,0.447202204395781,0.283826764390657,1  
.57561675113998,0.115114153299154,0.55469980403453

"3200", "IFI44L", 112.012161076294, -0.607371341028624, 0.385568603940037, -1.57526140567991, 0.115196118514447, 0.554747943423992  
"3201", "ZFH4", 1056.97112016891, 0.416530008001454, 0.264409109708538, 1.57532396845404, 0.115181684239813, 0.554747943423992  
"3202", "AC008875.3", 139.966065388947, -0.26271330044539, 0.166815171481841, -1.57487654217344, 0.115284944235804, 0.555002315863496  
"3203", "KLF3-  
AS1", 69.8051076778743, 0.38295638910278, 0.243267691481178, 1.57421804256489, 0.115437049531042, 0.555049720203976  
"3204", "NUP43", 41.1280805977215, 0.481967752091085, 0.306180842898878, 1.57412771983995, 0.115457925268702, 0.555049720203976  
"3205", "ME3", 57.2889061927379, -0.402713481242453, 0.255790302829722, -1.57438916482513, 0.115397507230289, 0.555049720203976  
"3206", "PHB2", 704.470136637254, -0.38896128057458, 0.247076822648558, -1.57425239812088, 0.115429109921206, 0.555049720203976  
"3207", "AC134312.5", 9.75758902240426, -0.79050436410563, 0.502208984955849, -1.57405460233876, 0.115474826642501, 0.555049720203976  
"3208", "CLIC4", 438.792439850621, 0.23555341360428, 0.149718641059336, 1.57330718431331, 0.115647706612559, 0.555469844354155  
"3209", "SEC61B", 1431.8042617373, -0.387948096071326, 0.246621001596281, -1.57305376898273, 0.115706368486616, 0.555469844354155  
"3210", "LNX2", 14.6115615743057, -0.707937767743275, 0.449942975674382, -1.57339442110904, 0.115627518004559, 0.555469844354155  
"3211", "TMT4", 34.110902099732, 0.542500299498711, 0.344858322671422, 1.57311064815333, 0.11569319977039, 0.555469844354155  
"3212", "SLC35B1", 143.667081993018, -0.4137339086325, 0.263076453337764, -1.5726755602156, 0.115793961686387, 0.555717284992422  
"3213", "AC103591.3", 232.418629368124, -0.587635026199992, 0.373778239689205, -1.5721488406832, 0.115916036832956, 0.555825250676849  
"3214", "CDC42SE1", 121.211578078876, -0.361295463556533, 0.22981537874904, -1.57211177738923, 0.11592463061473, 0.555825250676849  
"3215", "RPS5", 7924.83138138872, -0.365820336622974, 0.23267015290071, -1.57227015181051, 0.115887912199051, 0.555825250676849  
"3216", "DPM2", 180.710086849931, -0.411081457838264, 0.261587656397686, -1.57148645123111, 0.116069699080695, 0.55600199233341  
"3217", "TFCP2", 88.0725884149552, 0.316156198056736, 0.201180162120668, 1.57150782027457, 0.11606473935552, 0.55600199233341  
"3218", "AL121601.1", 5.52380908933059, 1.06913068221504, 0.680201010973465, 1.57178637633155, 0.116000102118305, 0.55600199233341  
"3219", "IP09", 131.424715162011, 0.347021556767868, 0.221299243616719, 1.56810999936762, 0.11685546332312, 0.55677394078925  
"3220", "PDCL3", 83.8888950675662, -0.426203082347093, 0.271474176766504, -1.56995809849595, 0.116424859775502, 0.55677394078925  
"3221", "PHF7", 29.6863092823437, 0.531344189450581, 0.338528862156802, 1.56956835545818, 0.116515565276584, 0.55677394078925  
"3222", "TMEM108", 44.047985762486, 0.800573435566745, 0.510200176488598, 1.56913594400655, 0.116616266016066, 0.55677394078925  
"3223", "STARD4-  
AS1", 15.7011288622831, 0.795201948020185, 0.506649145852955, 1.56953180426554, 0.11652407473872, 0.55677394078925

"3224", "AL662884.5", 33.3414579751666, -0.559827642086314, 0.356663503716031, -1.56962413101857, 0.11650258114127, 0.55677394078925  
"3225", "STMP1", 498.435416686303, -0.292519347817592, 0.186485985652645, -1.56858622267975, 0.116744384768552, 0.55677394078925  
"3226", "XRCC2", 2.4907748615734, -1.62987068739, 1.03780686163512, -1.57049519293218, 0.116299951865791, 0.55677394078925  
"3227", "HSPA14", 41.2232179452319, 0.395479495160586, 0.251874577289027, 1.57014455137634, 0.116381485929917, 0.55677394078925  
"3228", "IFIT5", 117.841427407175, 0.322639767167424, 0.205627914602719, 1.56904653626807, 0.116637095973806, 0.55677394078925  
"3229", "SSSCA1-AS1", 7.98230300133993, 0.924151953785785, 0.589035486258944, 1.56892407222393, 0.116665632037369, 0.55677394078925  
"3230", "VWA5A", 79.4158128645844, -0.38884650706043, 0.247970345342808, -1.56811697190189, 0.116853836388812, 0.55677394078925  
"3231", "LINC00648", 22.5575087099824, 0.598136967526631, 0.380939831930808, 1.57016126272475, 0.116377599050593, 0.55677394078925  
"3232", "BTBD1", 121.737474264092, -0.327562804241138, 0.208791583011766, -1.56885061895756, 0.116682750443532, 0.55677394078925  
"3233", "AC024337.2", 3.95237858416729, 1.49289527378468, 0.951914951963127, 1.56830741097815, 0.116809407218416, 0.55677394078925  
"3234", "SHPK", 52.10299970759, 0.496325403775438, 0.316420500832014, 1.56856272735291, 0.116749863081783, 0.55677394078925  
"3235", "QTRT1", 122.627863833733, -0.361360957076856, 0.23011480398278, -1.57035075893638, 0.116333531411189, 0.55677394078925  
"3236", "WFDC3", 28.532945235673, -0.972126005370005, 0.619978079848273, -1.56800060674389, 0.116880990748882, 0.55677394078925  
"3237", "IBA57", 40.3171978593635, 0.480380034483352, 0.306505491746788, 1.56728035033123, 0.117049176263054, 0.557402858231382  
"3238", "LINC01089", 24.2059356278192, 0.550284067105483, 0.351164741010841, 1.56702539532149, 0.117108755770794, 0.557514351515377  
"3239", "CDC37L1", 131.968275182178, -0.349586801204517, 0.223130152831242, -1.56673939747138, 0.117175617899848, 0.55752653901187  
"3240", "PTDSS2", 76.9369012121963, -0.404933754234434, 0.258462022541245, -1.56670504336789, 0.117183651404376, 0.55752653901187  
"3241", "SIKE1", 168.633445489238, 0.26033946735376, 0.16618888257043, 1.56652757589504, 0.117225158013023, 0.557551931740434  
"3242", "CHST2", 7.71807016284072, -1.05738803029438, 0.675121388162833, -1.56621912567722, 0.117297326708982, 0.557618551092457  
"3243", "LINC02381", 268.512397741522, 0.366819143810082, 0.234215847586228, 1.56615851399652, 0.117311512240859, 0.557618551092457  
"3244", "AL357497.1", 2.94948469513545, 1.66055891391396, 1.06053950236435, 1.56576809276027, 0.117402918537946, 0.557764119435259  
"3245", "OXA1L", 272.433490775816, -0.277979025326488, 0.177540855869542, -1.56571862834067, 0.117414503247967, 0.557764119435259  
"3246", "SESN2", 80.8156006409322, 0.518441973278901, 0.331236365600591, 1.56517226705731, 0.117542522337349, 0.557903464090623  
"3247", "USP49", 21.3801746097553, 0.774309563062553, 0.494725375291814, 1.56513007364101, 0.1175524133225, 0.557903464090623  
"3248", "TBX3", 146.3282013513, -0.396203510686674, 0.253137605396446, -1.5

6517049320336,0.117542938151228,0.557903464090623  
"3249","GAP43",16.0221796972177,-1.16364478583822,0.743586456035981,-1  
.56490852730367,0.117604358958513,0.557978206631418  
"3250","AAK1",283.916679512559,0.325325442666919,0.207995706010834,1.5  
6409691770259,0.117794809729362,0.558537985843777  
"3251","RBPJ",1891.08273527587,0.375430649009208,0.240011243919639,1.5  
6422108763751,0.117765656577699,0.558537985843777  
"3252","STARD5",35.637253496315,0.600639315412778,0.384128906587498,1.  
56363997895577,0.117902140539309,0.558874998897124  
"3253","A1BG-  
AS1",3.44720018492121,-1.44429544851768,0.923870129858913,-1.563310038  
75863,0.117979688222915,0.559070671366809  
"3254","C1QTNF2",179.53314564108,-0.408676942008893,0.261446563526625,  
-1.56313755475036,0.11802024402505,0.559090983910923  
"3255","ZNF678",45.8264295978606,0.476016892081203,0.304596790580644,1.  
.56277710994192,0.11810502996203,0.559320748652746  
"3256","PDGFA",25.0106245669802,-0.747607515097645,0.478492680102915,-  
1.56242205196712,0.11818859548373,0.559544594404696  
"3257","XIST",2377.974989463,0.473951919138913,0.30342303216447,1.5620  
1694959665,0.118283995960368,0.559824316158758  
"3258","AC009061.2",16.6692232937481,0.619514942169833,0.3967409854590  
63,1.56150981339375,0.118403510238342,0.560217958969932  
"3259","NCAPG",4.14941642767504,1.27856312780677,0.818953035447662,1.5  
6121666623762,0.118472637957194,0.560373032865955  
"3260","CCT5",386.367208814247,-0.35465786812661,0.227384988667148,-1.  
5597241937803,0.118825072245991,0.561564377473554  
"3261","LINC00621",2.70441924755138,-1.50947226815062,0.96780218479529  
3,-1.55969090777564,0.118832941803641,0.561564377473554  
"3262","NDUFV2",745.500566558676,-0.398452413894981,0.255469424920753,  
-1.55968728554731,0.118833798204264,0.561564377473554  
"3263","LINC01686",14.5214920794328,-0.720724914517551,0.4624131344509  
68,-1.5586168748716,0.119087086607681,0.561783283805972  
"3264","ZNF124",17.2711262078048,-0.7221405075254,0.463610484845209,-1.  
.55764490047396,0.119317448665634,0.561783283805972  
"3265","CHAC2",5.79647089797236,-1.15791277822518,0.743177851343022,-1.  
.55805609132817,0.119219952110464,0.561783283805972  
"3266","C2orf27A",87.9823326401437,0.296275312807848,0.190150225687939  
,1.55811181257326,0.119206744973785,0.561783283805972  
"3267","KIF2A",167.454349296266,-0.257510932609107,0.165192048629718,-  
1.5588579156514,0.119030012894441,0.561783283805972  
"3268","ELP3",60.1380457295867,0.401646448419266,0.257676090298757,1.5  
5872610436453,0.119061220556326,0.561783283805972  
"3269","SURF2",117.088203857218,-0.424919078308179,0.272681891004805,-  
1.55829592035758,0.119163115611302,0.561783283805972  
"3270","C12orf10",293.393091280166,-0.426746858664814,0.27392249690813  
5,-1.55791095467391,0.119254358010466,0.561783283805972  
"3271","MAP3K12",144.133765542576,0.318490394121507,0.204288744388291,  
1.55902076286765,0.118991466014754,0.561783283805972  
"3272","STARD9",163.724363411269,0.550467338989696,0.353177344243136,1.  
.55861452599502,0.119087642880935,0.561783283805972

"3273", "RBPM52", 9.11822787115705, 0.831623948288773, 0.533890647235799, 1.55766719757029, 0.119312160248809, 0.561783283805972  
"3274", "SCML2", 9.00112267372217, 0.92853404700264, 0.595990521000923, 1.5579678103659, 0.119240878949715, 0.561783283805972  
"3275", "MBD3", 138.314429418, -0.323252383816987, 0.207548888956154, -1.55747585758108, 0.119357548169773, 0.561800490087651  
"3276", "C6orf62", 352.879270438723, 0.31305867180719, 0.201027058483053, 1.55729618773475, 0.11940018012169, 0.561805883076427  
"3277", "RTL10", 33.7477860819809, 0.455749000432224, 0.292678895333145, 1.55716386695208, 0.119431584744823, 0.561805883076427  
"3278", "THAP7", 145.364133295293, -0.373034137699986, 0.239632314154717, -1.55669379989853, 0.119543201404152, 0.562159380611654  
"3279", "HYAL1", 15.9878265403477, -0.745464302620163, 0.478943293887751, -1.55647716991498, 0.119594667343524, 0.562174900223147  
"3280", "GFPT2", 614.91462472414, 0.476191526162685, 0.305962356144362, 1.55637292170022, 0.119619440332918, 0.562174900223147  
"3281", "ZNF703", 302.002433056152, 0.452742864937863, 0.290978918849757, 1.55593012279914, 0.119724709503362, 0.562326751064692  
"3282", "ZFAS1", 2207.12063393312, -0.342799090960095, 0.22030789621712, -1.55600002018201, 0.11970808756845, 0.562326751064692  
"3283", "TRMT61B", 60.1607489330178, -0.393893023824325, 0.253230054516746, -1.55547501885593, 0.119832979627581, 0.56266383824525  
"3284", "S100A13", 4870.40691428396, -0.38497767767006, 0.247562477475639, -1.55507281069258, 0.119928729563214, 0.562705843923196  
"3285", "ATP6V1C1", 152.875390295336, 0.274382525279177, 0.176425557564892, 1.55523116415974, 0.119891024685624, 0.562705843923196  
"3286", "COPE", 830.751504948193, -0.435904824742541, 0.280328709188239, -1.55497746201169, 0.119951437115253, 0.562705843923196  
"3287", "MZB1", 4.26333637292949, 1.40384433508788, 0.903374761082324, 1.55399995169884, 0.120184428150132, 0.563284572798504  
"3288", "PEX16", 113.235305789812, -0.413338593544401, 0.265935027733248, -1.55428413123152, 0.120116657032853, 0.563284572798504  
"3289", "CFL1", 2668.73072555241, -0.400075128704068, 0.257438894775136, -1.55405860118192, 0.120170438973778, 0.563284572798504  
"3290", "LINC00853", 4.59591481946548, 1.22751035371584, 0.790666461219608, 1.55250085076632, 0.120542429302118, 0.563369468432547  
"3291", "ACKR4", 588.408734024987, 0.551914074126718, 0.355271991559318, 1.55349728444486, 0.120304377516458, 0.563369468432547  
"3292", "LMNB1", 9.02156920123419, 0.926919094815169, 0.596801367773289, 1.5531450577494, 0.120388483718799, 0.563369468432547  
"3293", "SCX", 4.63402523364985, -1.16994111490706, 0.753167958283969, -1.55336017954438, 0.12033711054337, 0.563369468432547  
"3294", "RHOTB1", 18.8151488194041, 0.777612428133719, 0.500911814260321, 1.55239386653715, 0.1205680101433, 0.563369468432547  
"3295", "GRID1", 22.6854854758644, 0.552309384477012, 0.355765260230465, 1.5524545148653, 0.120553508089467, 0.563369468432547  
"3296", "LRP6", 304.413165324733, 0.430998627925873, 0.277559033950579, 1.552817870099, 0.120466652222526, 0.563369468432547  
"3297", "ZNF268", 69.8000524842768, 0.357359395951134, 0.230186038413681, 1.55248076040521, 0.120547232754713, 0.563369468432547

"3298", "CPD", 136.475319727682, 0.288972553957043, 0.185999306116897, 1.55362167735954, 0.120274685436545, 0.563369468432547  
"3299", "FAM171A2", 16.031692308781, 0.830948005265662, 0.535061108807374, 1.55299645514847, 0.120423981489467, 0.563369468432547  
"3300", "TMEM43", 555.195188360165, -0.290597112315826, 0.18721166289308, -1.5522382944795, 0.120605216330105, 0.563372548402596  
"3301", "PUSL1", 47.8395858697957, -0.490649097600618, 0.316190993510361, -1.55174912527842, 0.120722263248665, 0.563419959213159  
"3302", "SORBS2", 44.0183033436488, 0.776027943028234, 0.500208194571385, 1.55140989581986, 0.120803485229677, 0.563419959213159  
"3303", "ENPP2", 228.086210685557, -0.565858462300241, 0.364803650510216, -1.55113157861449, 0.120870154870654, 0.563419959213159  
"3304", "AC121761.2", 8.05914032996315, 0.888310027081184, 0.572731863330338, 1.55100507577108, 0.120900467576393, 0.563419959213159  
"3305", "MED1", 160.402685966888, 0.400252653078901, 0.258025665403219, 1.55121256039946, 0.120850753077245, 0.563419959213159  
"3306", "ERBB2", 106.094313475056, 0.33839698333887, 0.218150035577338, 1.55121213912845, 0.12085085399997, 0.563419959213159  
"3307", "AC008622.2", 3.55667488687218, 1.31246808056634, 0.846221508319029, 1.55097461795019, 0.120907766790602, 0.563419959213159  
"3308", "DYRK1A", 126.490412875176, 0.375578433472652, 0.242019713679928, 1.55185058176441, 0.120697979745145, 0.563419959213159  
"3309", "DMXL1", 142.393769744648, 0.288542708284811, 0.186108705457376, 1.55039877138308, 0.121045833269862, 0.563892873936213  
"3310", "MZT2A", 581.059247120233, -0.38239021265281, 0.246926651444257, -1.54859838100195, 0.121478295380264, 0.563906568469583  
"3311", "TLR1", 10.7523140207068, 0.763946317827021, 0.493251354972663, 1.54879720070786, 0.121430478695149, 0.563906568469583  
"3312", "CENPH", 26.0739181276278, -0.539102799801348, 0.348062474397524, -1.54886791727406, 0.121413474716379, 0.563906568469583  
"3313", "KLHL3", 8.5460276662595, 1.02563798778146, 0.662071399428141, 1.54913501575109, 0.121349267006303, 0.563906568469583  
"3314", "EPM2A", 13.7251934181076, -0.697812922585135, 0.450301755706709, -1.54965623327402, 0.121224048191216, 0.563906568469583  
"3315", "C1GALT1", 269.113831068975, 0.297751969994126, 0.192222017795494, 1.54900033517963, 0.121381639501681, 0.563906568469583  
"3316", "LINC00174", 25.7615150461956, 0.557741711005054, 0.360002254531814, 1.5492728281116, 0.121316148729276, 0.563906568469583  
"3317", "RBP4", 3.94579680756329, -1.18222983237484, 0.762881690789203, -1.5496896132765, 0.121216032327399, 0.563906568469583  
"3318", "KAT8", 151.046382398167, -0.300395685456693, 0.193900315025307, -1.54922742347008, 0.121327059331604, 0.563906568469583  
"3319", "WSB1", 1628.1152071293, 0.457130861033685, 0.294991832323552, 1.54963904401359, 0.12122817617682, 0.563906568469583  
"3320", "RBM42", 233.104946842528, -0.339189274463766, 0.219035413280499, -1.54855906350357, 0.121487753090333, 0.563906568469583  
"3321", "PRPF31", 259.145200659084, -0.349674253642723, 0.225562900884083, -1.55022945826726, 0.121086451682567, 0.563906568469583  
"3322", "MUL1", 87.4115685892504, 0.327580085925463, 0.211723165978242, 1.54720946294147, 0.121812744859009, 0.564056311805833

"3323", "CLHC1", 16.0713112826809, 0.906306365068213, 0.585713444039358, 1.547354554162, 0.121777773462199, 0.564056311805833  
"3324", "STK16", 131.315144960682, -0.421671408364884, 0.272496004244963, -1.54744070296832, 0.121757012694355, 0.564056311805833  
"3325", "SMC4", 110.022090090383, -0.425644736049689, 0.275070938531506, -1.54739987554497, 0.121766851239689, 0.564056311805833  
"3326", "GGCT", 162.551378285132, -0.406276323104097, 0.262420315415313, -1.54818929495269, 0.121576728018815, 0.564056311805833  
"3327", "PLPP7", 28.753549688856, 0.447914943745794, 0.289358791075915, 1.547956922547, 0.121632668302396, 0.564056311805833  
"3328", "AGAP4", 24.603641658936, 0.516495845758688, 0.333632901697352, 1.54809625528844, 0.121599123551859, 0.564056311805833  
"3329", "FIBP", 341.656824077209, -0.426429759119519, 0.275605693580879, -1.54724582637978, 0.121803979427193, 0.564056311805833  
"3330", "QARS", 252.49925009923, -0.28022192763217, 0.181144151746885, -1.54695542157898, 0.121873995462832, 0.564112537358927  
"3331", "AC011446.2", 6.26515535611559, -0.983186755529632, 0.635603462986596, -1.54685556763615, 0.121898077323554, 0.564112537358927  
"3332", "PCDHB16", 43.604446341255, 0.569874699448072, 0.36847725992217, 1.5465668073206, 0.121967738829938, 0.564251097741796  
"3333", "NXF1", 119.000707132542, 0.393285126978432, 0.254318414348058, 1.54642803977295, 0.122001226647642, 0.564251097741796  
"3334", "EPHA3", 3.91951286034472, 1.48643593453789, 0.961371106818802, 1.5461624798113, 0.122065332444579, 0.564378254239106  
"3335", "COQ10B", 404.845490401806, -0.333840408836462, 0.215938913291554, -1.5459946692689, 0.122105855244993, 0.564396329415763  
"3336", "FAM50A", 377.804058351359, -0.338927127763875, 0.219257442113236, -1.54579531940739, 0.122154007807787, 0.564449649387601  
"3337", "MKKS", 81.920374992855, -0.357207482103132, 0.231168264443778, -1.54522716585956, 0.122291325598294, 0.564914828917499  
"3338", "RANBP9", 143.972333066185, 0.348722240787516, 0.225716956036545, 1.54495367521728, 0.122357468915091, 0.565051043536888  
"3339", "ADI1", 703.713223934997, 0.387790479040075, 0.251230128252626, 1.5435667757576, 0.122693318993909, 0.56542635683049  
"3340", "DYNC2LI1", 183.917387990037, -0.255888983816236, 0.165772649584288, -1.54361400664063, 0.122681869781073, 0.56542635683049  
"3341", "GPAT2", 30.6830951006301, -0.871088530808933, 0.564552384375179, -1.54297201626916, 0.122837565770061, 0.56542635683049  
"3342", "PIK3CA", 198.010552699477, 0.297576002084929, 0.192900613061699, 1.54263896501847, 0.122918398394097, 0.56542635683049  
"3343", "TSPYL4", 83.1474433984372, -0.368826381266661, 0.239132982005178, -1.54234843798617, 0.122988944174676, 0.56542635683049  
"3344", "VLDLR", 15.758536560672, 1.8335692300497, 1.18874777509663, 1.54243757040946, 0.122967297675855, 0.56542635683049  
"3345", "BANF1", 525.987559583051, -0.443595324742025, 0.287349763605302, -1.54374696250434, 0.122649644503884, 0.56542635683049  
"3346", "SERPINA1", 9.25953354723292, -0.878104629090513, 0.568655707088415, -1.54417623554068, 0.122545644273623, 0.56542635683049  
"3347", "NFATC3", 94.5351347897844, 0.35203636468852, 0.228232407326182, 1.54244688040906, 0.122965036842047, 0.56542635683049



"3348", "VAT1", 1330.63967398843, 0.226843223699407, 0.147035243277672, 1.5  
4278129952164, 0.122883848263993, 0.56542635683049  
"3349", "DBF4B", 9.62573071919554, 0.826980751199504, 0.536051681668941, 1.  
54272578461984, 0.122897322991402, 0.56542635683049  
"3350", "ALPK2", 39.8397533459342, 1.33301082099763, 0.864004481947609, 1.5  
428285950471, 0.122872369476265, 0.56542635683049  
"3351", "AC036176.1", 75.9920411708001, 0.513062522652074, 0.3326083200842  
16, 1.54254265955273, 0.122941779786637, 0.56542635683049  
"3352", "NDUFS7", 465.929989300205, -0.375463218782426, 0.243269846533311,  
-1.54340221006804, 0.122733217795101, 0.56542635683049  
"3353", "MAP3K7CL", 14.2763481647042, -0.616265485283665, 0.39910555351797  
4, -1.54411653722055, 0.12256010329444, 0.56542635683049  
"3354", "ARF1", 1088.18386951651, -0.244554575242837, 0.158579953091474, -1  
.5421531566589, 0.123036380159371, 0.565475790148093  
"3355", "ARRDC1-  
AS1", 38.2383205085281, 0.479284736390085, 0.310909660805722, 1.5415562679  
7835, 0.123181459580168, 0.565973829933916  
"3356", "GATD1", 74.2725595660204, 0.34175041939779, 0.221715579882592, 1.5  
4139109023715, 0.123221631177455, 0.56598970339704  
"3357", "PSMD2", 415.886909587555, -0.260833640174497, 0.169240401907583, -  
1.54120196616485, 0.123267639137332, 0.566032367382181  
"3358", "MCOLN3", 98.8178445029711, 0.669255573750128, 0.434437796929683, 1  
.5405095470053, 0.123436197480084, 0.566228465574237  
"3359", "MPC2", 516.158603551418, -0.367320917340006, 0.238436222131469, -1  
.54054159244929, 0.123428392561272, 0.566228465574237  
"3360", "MANF", 342.023492652856, -0.331807575390018, 0.215343224196334, -1  
.54083127819941, 0.123357854811708, 0.566228465574237  
"3361", "PI16", 1516.41028208443, 0.649333919490339, 0.421529612875834, 1.5  
4042302048565, 0.123457273616284, 0.566228465574237  
"3362", "HOMER3", 361.225490353229, -0.37957077401433, 0.246464980980585, -  
1.54005965676816, 0.123545812451652, 0.566466002064907  
"3363", "TMEM160", 395.530696933469, -0.324337766319218, 0.210622694713694  
, -1.53989942422919, 0.123584871176733, 0.566476595060759  
"3364", "PARP11", 36.6373566249208, 0.407284523791292, 0.264658802665883, 1  
.53890412746054, 0.123827703394451, 0.567420941684144  
"3365", "MPZL1", 700.48752368654, 0.288236305231411, 0.18738809354508, 1.53  
817833234997, 0.124005017342192, 0.567703203855114  
"3366", "PTK2B", 24.1622187368122, 0.563274121497891, 0.36630267326319, 1.5  
3772866706101, 0.124114971296276, 0.567703203855114  
"3367", "POGLUT3", 418.822420038693, 0.281639193063471, 0.183182850040438,  
1.53747576807163, 0.124176844582235, 0.567703203855114  
"3368", "GLIPR1", 207.936682794332, 0.315784441183552, 0.205415461721697, 1  
.53729635800924, 0.124220752942154, 0.567703203855114  
"3369", "VASN", 673.760324237992, -0.444597039274063, 0.289182160645651, -1  
.53742899728469, 0.124188289977974, 0.567703203855114  
"3370", "ZNF423", 141.992301282073, 0.318302759372164, 0.207046408098235, 1  
.53734982555767, 0.124207666164231, 0.567703203855114  
"3371", "CTU2", 41.0342066045744, -0.436255470434103, 0.283716825483497, -1  
.53764398600843, 0.124135686354881, 0.567703203855114  
"3372", "EXOC7", 272.177675718614, 0.248490128174911, 0.161567118988346, 1.

53799937593017,0.124048767372212,0.567703203855114  
"3373","RPS6KA6",9.94211714369465,-0.868438003455018,0.564552724993747  
,-1.53827616980263,0.123981103808422,0.567703203855114  
"3374","EEF1AKMT2",146.573353816418,-0.330251368440934,0.2148748501869  
33,-1.53694752156256,0.124306160953288,0.567783836324395  
"3375","RSL1D1",588.489847168207,-0.320453970542729,0.20850353743721,-  
1.53692342336989,0.124312062769694,0.567783836324395  
"3376","SUM04",13.6480337027851,0.72737485199916,0.473338166003009,1.5  
36691744385,0.124368813731432,0.56787478189278  
"3377","RSF1",625.696328563498,0.240984026065637,0.156856691108655,1.5  
3633245966349,0.124456862346431,0.568108538072324  
"3378","AC016405.2",3.2770397945149,-1.24219483182139,0.80872062730627  
8,-1.53599993604584,0.124538396031455,0.568266612079332  
"3379","ARFIP2",111.22055221708,-0.358630808311509,0.2335002343517,-1.  
53589057119033,0.124565221032505,0.568266612079332  
"3380","POLR2H",219.436242343391,-0.323671097409367,0.21082636932151,-  
1.53524959164747,0.124722531047339,0.568815921921517  
"3381","EEF1E1",101.818229998348,-0.415933586275145,0.27099282977685,-  
1.53485089113851,0.12482045875852,0.568859555848434  
"3382","SELENOS",797.526897447245,-0.302942333297152,0.19738743912957,  
-1.53475993524742,0.124842807488501,0.568859555848434  
"3383","RAP2C",121.881681108404,0.289096831946954,0.188357305997742,1.  
53483205982156,0.124825085536611,0.568859555848434  
"3384","TIAM1",41.7727718757665,0.56988561563595,0.371397697665372,1.5  
3443497150974,0.124922679666439,0.569055291683851  
"3385","VPS53",128.479196023693,0.459877337508962,0.299742086989782,1.  
53424346286292,0.124969768843746,0.569101620894046  
"3386","DYNLRB2",9.86310528953448,-0.739092790243956,0.481889700481644  
,-1.53373850801385,0.125093996212744,0.569499099710411  
"3387","NPM1",2381.03133646691,-0.391358353518861,0.255192772826372,-1.  
.53357929844327,0.125133184394728,0.569509311321148  
"3388","CYP20A1",183.685671882984,-0.333710598573081,0.217757673469313  
,-1.53248605781099,0.125402535496622,0.569954748450076  
"3389","SLC4A7",192.190478268179,-0.445944837697702,0.291033167751108,  
-1.53228183970795,0.125452900518398,0.569954748450076  
"3390","MBNL1-  
AS1",17.0162871393438,-0.602327214631993,0.393036496133778,-1.53249690  
692077,0.12539986029004,0.569954748450076  
"3391","REEP3",252.199917483972,-0.259311864367549,0.169187613366679,-  
1.53268823412943,0.12535268955158,0.569954748450076  
"3392","DNMT1",176.279174956051,-0.363994040165564,0.237546441108374,-  
1.53230685531299,0.125446730230516,0.569954748450076  
"3393","ATP6AP2",1161.80891276339,-0.271364131112217,0.177080646155159  
,-1.53243246511788,0.125415751198908,0.569954748450076  
"3394","NRM",50.8574728085074,-0.430237256242995,0.280997066403775,-1.  
53110942313103,0.125742351313899,0.570455194946508  
"3395","GIMAP2",17.155593390986,0.593700349036236,0.387716685732114,1.  
53127366163045,0.12570177215873,0.570455194946508  
"3396","PDGFRL",2053.71997311269,-0.242485268735845,0.15836589232975,-  
1.53117104427349,0.125727125101032,0.570455194946508

"3397", "RPL30", 17267.1925932793, -0.411022806733941, 0.268447927278532, -1.53110814041592, 0.125742668280335, 0.570455194946508  
"3398", "NPC2", 1363.41487934204, -0.358122282125967, 0.233900794592969, -1.53108621434641, 0.125748086437122, 0.570455194946508  
"3399", "ZIC1", 41.3785809415118, -0.626213007947715, 0.409179344242535, -1.53041207177002, 0.125914762774031, 0.571043268067574  
"3400", "ZNF213-  
AS1", 21.3691710768296, -0.571540499994887, 0.373547726867143, -1.530033403732, 0.126008460861135, 0.571300124757177  
"3401", "GLDN", 7.80110020896274, -1.11310251449594, 0.727981716735903, -1.52902537097611, 0.126258154463258, 0.571591615580361  
"3402", "ALDH3A2", 467.913402828461, 0.210213482195978, 0.137459909513062, 1.52927121035244, 0.126197223602923, 0.571591615580361  
"3403", "POLDIP2", 147.802627576364, -0.367752583864345, 0.240502743684144, -1.52909932847718, 0.126239821816774, 0.571591615580361  
"3404", "CCDC9", 46.59848411206, -0.476257119750802, 0.311422780834939, -1.52929441601521, 0.126191473302965, 0.571591615580361  
"3405", "AC244090.1", 38.0644063693711, 0.596784577920332, 0.390236571682213, 1.52928920871701, 0.126192763639502, 0.571591615580361  
"3406", "EPA2", 28.5541371560016, 0.629055429579775, 0.411515565966466, 1.52863094765906, 0.126355959456067, 0.571866445982169  
"3407", "CREBBP", 349.757136697097, 0.339582991006094, 0.222285428374909, 1.52768894249491, 0.126589786811213, 0.572756549367434  
"3408", "HDAC9", 10.7940145986088, -0.934610022050644, 0.611931818895152, -1.52731071206281, 0.126683767038559, 0.573013576554986  
"3409", "TMEM39B", 76.5880319520098, -0.334102505371051, 0.218787770857581, -1.5270620659531, 0.126745578583402, 0.573124990866279  
"3410", "DPCD", 149.704701418479, -0.381896969566516, 0.250240153471025, -1.52612186441428, 0.126979517826688, 0.573846164555377  
"3411", "ADAP2", 5.32018451639321, -1.21776564203451, 0.797917981852826, -1.52617896792696, 0.1269652998556, 0.573846164555377  
"3412", "CRAMP1", 50.2808171193974, 0.521927190069848, 0.342034655565718, 1.52594826745433, 0.127022748636365, 0.573873291392017  
"3413", "LINC00623", 178.137871578967, -0.335232023195454, 0.219970051452779, -1.52398938392492, 0.127511363149406, 0.57404819583176  
"3414", "RABIF", 61.6384060057468, -0.382129395940465, 0.250911457668732, -1.5229651108439, 0.12776743439124, 0.57404819583176  
"3415", "SPTBN1", 2758.4416379306, 0.300766409701627, 0.197451723375135, 1.52324023594469, 0.127698613064343, 0.57404819583176  
"3416", "FAIM", 141.911670321072, -0.34129593177415, 0.223837936985356, -1.52474569936944, 0.127322538458795, 0.57404819583176  
"3417", "LRR1", 7.5298256863967, -1.06954185508898, 0.701856743483922, -1.52387487192888, 0.127539971643477, 0.57404819583176  
"3418", "LRR4", 4.31062392300954, 1.2320002106073, 0.808076421925544, 1.52460853599911, 0.127356767046453, 0.57404819583176  
"3419", "SEMA4D", 10.3117387891105, 0.871005980404386, 0.57170977565832, 1.52351073479796, 0.127630977085313, 0.57404819583176  
"3420", "IER5L", 416.46914277891, -0.404041070421869, 0.265054993383767, -1.52436694462446, 0.127417072647145, 0.57404819583176  
"3421", "ERCC6", 76.6771948913735, 0.406422765193423, 0.266798642934413, 1.

52333145597496,0.127675801142968,0.57404819583176  
"3422","BUD13",50.1591163921677,-0.428973863826824,0.281671352640597,-  
1.52295879508265,0.127769014589606,0.57404819583176  
"3423","DENND4A",84.086173003202,0.451524298269087,0.296354442141128,1  
.52359551288273,0.127609784769333,0.57404819583176  
"3424","AC068338.2",6.20966222566757,-0.894142340245386,0.586407858535  
599,-1.52477891834239,0.1273142498695,0.57404819583176  
"3425","AP000919.4",3.77337966145953,1.5764306906744,1.0335911447991,1  
.52519755863505,0.12720982935508,0.57404819583176  
"3426","MKNK2",331.269714209151,0.333308497984923,0.218787430606788,1.  
52343531372218,0.127649832693296,0.57404819583176  
"3427","FBL",395.218941303158,-0.326514069040721,0.214276898381553,-1.  
52379501246706,0.127559925861381,0.57404819583176  
"3428","SPHK2",36.3343227562781,0.507146791033587,0.332692786432754,1.  
52436966389139,0.127416393745071,0.57404819583176  
"3429","HAS1",276.617072701589,-1.28959258468024,0.84640646501082,-1.5  
2360909089199,0.127606390874507,0.57404819583176  
"3430","APMAP",196.917109835179,0.308186916542711,0.202136824535362,1.  
52464508755947,0.127347645046563,0.57404819583176  
"3431","TAF1",126.257021419159,0.394635895724176,0.258806142186216,1.5  
2483203215567,0.127300998116967,0.57404819583176  
"3432","AL031280.1",5.97217207788665,1.16363103087808,0.76435748652866  
2,1.52236492922013,0.127917667267894,0.574447070856748  
"3433","AC027702.1",3.05957144857442,-1.32396887638225,0.8697124814449  
01,-1.52230639967668,0.127932325283893,0.574447070856748  
"3434","C1orf167",27.7566029439661,0.517259503952378,0.339958140703742  
,1.52153880734142,0.128124680405027,0.574475999937103  
"3435","STT3B",232.030532648362,0.293648285846715,0.19302421463387,1.5  
2130283966553,0.12818385798884,0.574475999937103  
"3436","ZKSCAN8",58.0830009910477,0.443075380377107,0.291277370711188,  
1.52114590740533,0.12822322629577,0.574475999937103  
"3437","RRP36",152.034669155354,-0.367594255911888,0.241636780382641,-  
1.52126781084315,0.128192644566983,0.574475999937103  
"3438","AC007566.1",15.7835352427029,0.74806454478425,0.4917946109238,  
1.52109138280118,0.128236906635327,0.574475999937103  
"3439","AP003119.3",3.95322445210596,1.20350097212304,0.79073711130909  
3,1.52199884754442,0.128009369458723,0.574475999937103  
"3440","GABPB1",43.0870728156773,0.380015598681629,0.249705307537,1.52  
185631306744,0.128045087673724,0.574475999937103  
"3441","ZNF329",27.3404514801914,0.482917855312463,0.317403237695416,1  
.52146480552248,0.128143236799539,0.574475999937103  
"3442","IGSF6",10.4929499047498,-0.768255074841691,0.505203060048054,-  
1.52068571154065,0.128338726049854,0.574765096472545  
"3443","CTCF",226.22002691464,0.314922428257035,0.207195084053382,1.51  
993195058575,0.128528079332256,0.575445931718478  
"3444","HNRNPR",597.68362061547,-0.264872596899914,0.174309379290334,-  
1.51955447250337,0.128622987659344,0.575703645403247  
"3445","CD83",59.8156623288691,-0.812857356735852,0.5353523110918,-1.5  
1835966688573,0.128923753559978,0.576714933583011  
"3446","GMFG",26.7355740485434,-0.664286459194911,0.437494354440305,-1

.5183886430826,0.128916452983568,0.576714933583011  
"3447","BMPR2",378.690099729637,0.304569789480442,0.20061947307444,1.5  
1814669240722,0.128977422510428,0.576787632143387  
"3448","UBAP2L",173.455584082936,0.272011504310008,0.17927442964215,1.  
5172911432655,0.129193193338679,0.576864435706209  
"3449","ZC2HC1B",6.49061021958914,1.40077227736833,0.923355443352138,1.  
.51704556187267,0.129255181112979,0.576864435706209  
"3450","PAPSS2",271.843675927694,0.333727306088669,0.219952672768189,1.  
.51726870098273,0.129198857088976,0.576864435706209  
"3451","MAPK8IP1",56.4135307831597,-0.357229421372066,0.23555585877414  
6,-1.51653804422917,0.129383358026976,0.576864435706209  
"3452","AMBRA1",38.9968561647141,0.456695622913622,0.30110496796537,1.  
516732274461,0.129334292251062,0.576864435706209  
"3453","USP12",128.504149742589,-0.314330050602373,0.207214465146325,-  
1.51693102303648,0.129284100027262,0.576864435706209  
"3454","FNDC3A",351.443830971498,0.23130593712123,0.152546349118119,1.  
5162993965993,0.129443664165279,0.576864435706209  
"3455","ABHD2",226.521189280362,-0.443337935424243,0.292104446993602,-  
1.51773771329799,0.129080532725762,0.576864435706209  
"3456","ECI1",309.393634919508,-0.361417240706953,0.238130078488652,-1.  
.51773032201883,0.129082396775102,0.576864435706209  
"3457","DSEL",246.200501314943,0.309819913604309,0.204164610321215,1.5  
1750057523126,0.12914034837074,0.576864435706209  
"3458","USF2",292.812080701619,-0.275625684097251,0.181723970622827,-1.  
.51672717227448,0.129335580963098,0.576864435706209  
"3459","EIF3K",1668.34418216277,-0.407109815490992,0.268474516029789,-  
1.51638159744674,0.129422889587693,0.576864435706209  
"3460","LINC01914",29.3756632295561,-0.544983722509978,0.3596020738476  
74,-1.5155188530443,0.129641059597164,0.57691020025701  
"3461","ABHD18",38.033833324322,0.459137415539413,0.302951559934752,1.  
51554728960068,0.129633864038983,0.57691020025701  
"3462","PABPC1",2169.42626277833,-0.265028365386598,0.174831811656981,  
-1.51590470220936,0.129543451145168,0.57691020025701  
"3463","EVI2A",9.26182406706803,-0.812998994393174,0.536355223732188,-  
1.51578461142968,0.12957382444995,0.57691020025701  
"3464","RBL1",37.3527254010557,0.502424409854921,0.331475867546633,1.5  
15719420462,0.129590314835012,0.57691020025701  
"3465","TBCE.1",19.7657901205535,0.588333602522603,0.38830648100265,1.  
51512691985841,0.129740265578843,0.577137542585685  
"3466","TAX1BP3",887.600044209788,-0.358375396832404,0.236571185520135  
,-1.51487340288068,0.1298044670869,0.577137542585685  
"3467","AL121894.2",2.43552297294814,1.64382070896441,1.08506473629661  
1,1.51495173880121,0.129784626397447,0.577137542585685  
"3468","PPP1R8",106.919264035575,0.287419456897803,0.189958421141795,1.  
.51306509693117,0.130263124302951,0.578350545827047  
"3469","MLLT11",18.3100295141709,-0.569961611016889,0.376650368793058,  
-1.51323789445177,0.130219241810629,0.578350545827047  
"3470","MTX1",222.374296696161,-0.374489982195183,0.247458243698297,-1.  
.51334615730872,0.13019175395205,0.578350545827047  
"3471","UBR3",128.448506287704,0.337367324858851,0.222947249406022,1.5

1321590985162,0.13022482423431,0.578350545827047  
"3472","KLHDC8B",144.672485765116,-0.380868933376789,0.251824829587679  
, -1.51243598179099,0.130422987089645,0.578350545827047  
"3473","ENPP4",11.5837475382235,0.961141553054173,0.635313951538675,1.  
51286076864261,0.130315028942991,0.578350545827047  
"3474","SRSF5",1739.32432544085,0.260272043256871,0.172117960601797,1.  
51217247954165,0.130489990164545,0.578350545827047  
"3475","HMG20A",88.6507573163689,0.278733062229987,0.184301441493522,1.  
51237592050947,0.130438257059829,0.578350545827047  
"3476","CLEC10A",16.7420712355391,-0.926387153826038,0.612429616474159  
, -1.51264264318139,0.130370456128994,0.578350545827047  
"3477","TOMM40",145.216700278062,-0.321374052310258,0.212418797565142,  
-1.51292661475359,0.130298300585143,0.578350545827047  
"3478","ZNF134",35.0385459395522,0.51860558625043,0.342931387420147,1.  
51227214910793,0.130464643152341,0.578350545827047  
"3479","ATP13A2",24.212096688198,-0.58259114050821,0.385491252269927,-  
1.51129535904558,0.130713215859772,0.578674388994369  
"3480","GORAB",43.2111335158534,0.417144033480052,0.275978939738023,1.  
51150676162475,0.130659387183522,0.578674388994369  
"3481","LCORL",62.0300958216115,0.379441005300689,0.251053697484104,1.  
51139381376653,0.130688144549505,0.578674388994369  
"3482","ANGPTL5",422.680962146045,-0.603817527627304,0.39948195181757,  
-1.51150139544489,0.130660753341807,0.578674388994369  
"3483","RNF217",97.6879662969463,0.397777119359616,0.263273428555672,1.  
51088972989731,0.13081654791412,0.578915706130699  
"3484","NME2",3634.70844465362,-0.392320220321643,0.259679445658812,-1.  
51078657506495,0.130842836208846,0.578915706130699  
"3485","FAM66B",11.033983889353,0.779434091807329,0.515974111635529,1.  
51060697471175,0.130888615892242,0.578952084355496  
"3486","BSDC1",215.722802349547,0.27572053258318,0.182708291989318,1.5  
0907509222022,0.131279593951509,0.579741665982606  
"3487","FNDC5",114.815248562516,0.641917428170963,0.425433504361201,1.  
50885490115504,0.131335867051138,0.579741665982606  
"3488","PLK3",303.151577232709,-0.458042326483168,0.303442880914305,-1.  
50948450365037,0.131175012470081,0.579741665982606  
"3489","DPH3",150.005647364291,-0.410370652626221,0.271865765861389,-1.  
5094605653124,0.131181125583803,0.579741665982606  
"3490","NPHP3",212.301145815966,0.44012477987409,0.291747311007796,1.5  
0858213004174,0.131405603694014,0.579741665982606  
"3491","SLC39A7",375.813905242652,-0.290077909771931,0.192275409754075  
, -1.50865838820964,0.131386104646201,0.579741665982606  
"3492","PHTF2",123.75449254492,0.312571156386598,0.207189430311347,1.5  
0862501005429,0.131394639091935,0.579741665982606  
"3493","WRN",81.8477833887315,0.431039146023235,0.285651372431319,1.50  
896928082105,0.131306633293724,0.579741665982606  
"3494","AXIN2",14.1329122524793,0.705099776032576,0.467355887243582,1.  
50869989076458,0.131375493475724,0.579741665982606  
"3495","TRPM4",15.9892340268562,-0.570789229542991,0.378442519729026,-  
1.50825871773523,0.131488324451276,0.579940635598404  
"3496","STBD1",31.2969838431501,-0.679737192187621,0.450722938674295,-

1.50810427839977,0.131527840397865,0.579948987337842  
"3497","FEN1",20.0770754278426,-0.55926795178954,0.371022609519269,-1.  
50736892426631,0.131716119612254,0.579949724028248  
"3498","WNT10B",65.998749493623,0.502538856430839,0.333381937214691,1.  
50739677329073,0.131708985377041,0.579949724028248  
"3499","SALL2",22.7765370234782,0.643425973160098,0.426852143979143,1.  
50737435019546,0.131714729599146,0.579949724028248  
"3500","ARID3B",12.1827468632466,0.680625672532009,0.451421529931733,1.  
50773861546865,0.131621438215304,0.579949724028248  
"3501","COQ8B",61.3876354923446,-0.338278945595831,0.22434155858576,-1.  
5078746342333,0.131586615807187,0.579949724028248  
"3502","GNG12-  
AS1",5.87354060407943,-0.975899108207389,0.647666379010872,-1.50679291  
041446,0.131863747365996,0.580102644305602  
"3503","ZNF26",46.1344566679622,0.485655046555182,0.322289389953021,1.  
50689120304573,0.131838546679941,0.580102644305602  
"3504","SLC44A2",146.520275911071,0.490176424050218,0.325299815058123,  
1.50684507448194,0.131850372854014,0.580102644305602  
"3505","NT5DC3",18.7340661599237,0.809192683608627,0.537119006503868,1.  
50654263545001,0.131927930786707,0.580219415999168  
"3506","IGFBP7",2295.01109029659,-0.560672657798239,0.372219823598996,  
-1.50629445894926,0.131991599954322,0.580249403854181  
"3507","ZNF160",94.828120711102,0.359197201053202,0.238475504814976,1.  
50622262580758,0.132010033040325,0.580249403854181  
"3508","TMEM242",214.151546104833,-0.34114657166637,0.22651510744654,-  
1.50606542544578,0.132050379147646,0.580261286933001  
"3509","AL359851.1",6.17323837302459,-1.27772385542727,0.8486436071009  
59,-1.50560711791854,0.132168060154903,0.580612894638881  
"3510","ANXA7",648.534494457412,-0.247223664688084,0.164266314037481,-  
1.50501742330247,0.132319597326614,0.581112989398792  
"3511","HDC",3.43797520124326,-1.76684850899263,1.17409174185587,-1.50  
486409707626,0.132359020474427,0.581120564116575  
"3512","SYTL2",61.2808568656472,-0.374288908049599,0.248808425164714,-  
1.50432569878538,0.132497525188691,0.581232029249762  
"3513","DHRS1",111.046944101939,-0.361818849844893,0.240511361512435,-  
1.5043732136795,0.132485297313141,0.581232029249762  
"3514","AC060766.4",2.59892706446557,1.82401491244095,1.21250550250786  
,1.5043353689268,0.132495036523736,0.581232029249762  
"3515","CFAP69",32.6907977537992,-0.671377074500473,0.446379444899127,  
-1.50405015771323,0.132568452437661,0.581377722425758  
"3516","SNRNP40",154.562686473436,-0.468149814104706,0.311816540641045  
, -1.50136299101473,0.133261700678647,0.582137250831178  
"3517","NEXN-  
AS1",7.90378369100555,0.913122791561514,0.608306831271057,1.5010891619  
5063,0.133332501658687,0.582137250831178  
"3518","NBPF9",43.5490765896773,0.759944888493174,0.505800665794219,1.  
50245924904012,0.132978544654321,0.582137250831178  
"3519","BMP2K",92.0708112285346,0.351566871426795,0.234187378615001,1.  
50122040524124,0.133298563887546,0.582137250831178  
"3520","TENM3",17.4014467309078,-0.564967658617095,0.376270023457529,-

1.50149526509083,0.133227510444944,0.582137250831178  
"3521","TSLP",10.0124324222642,1.13609165764902,0.756047392570175,1.50  
267254250675,0.132923506563318,0.582137250831178  
"3522","RPS10",6885.08090362858,-0.503454610096778,0.335199181153867,-  
1.50195656315066,0.133108327140361,0.582137250831178  
"3523","GALT",94.7993105564075,0.387202884580559,0.257738852369292,1.5  
0230700967726,0.133017839177615,0.582137250831178  
"3524","PTGES2",88.0337074633683,-0.420951903856402,0.28032849013428,-  
1.50163796642561,0.133190632584765,0.582137250831178  
"3525","FADS3",75.9094089944601,-0.386475193621721,0.257322215521809,-  
1.50191149581862,0.133119967325785,0.582137250831178  
"3526","SPA17",37.3658889044279,-0.462821173368224,0.307930725385143,-  
1.50300419936774,0.132837961101504,0.582137250831178  
"3527","AC127502.2",49.5393006085879,-0.550825791532667,0.366735557552  
602,-1.50196996224905,0.133104866515229,0.582137250831178  
"3528","TRADD",235.574020205435,-0.344173892153858,0.229048804189947,-  
1.50262252348822,0.13293641185128,0.582137250831178  
"3529","BCL2",85.0580271572774,0.487068070487732,0.324487618453391,1.5  
0103745963945,0.133345873025293,0.582137250831178  
"3530","SERTAD1",1185.78210663493,-0.505911675578442,0.336898054286478  
, -1.50167586052083,0.133180841059862,0.582137250831178  
"3531","C20orf27",102.409779005033,-0.40629092020212,0.270477721879203  
, -1.50212341844395,0.133065237891856,0.582137250831178  
"3532","TAB2",164.583242187969,0.340018612500026,0.226608370922716,1.5  
0046801499662,0.133493212731907,0.582615479689225  
"3533","EEPDI",24.2807559468867,-0.633101476880605,0.422004026905051,-  
1.50022615074014,0.133555831472952,0.582723787759849  
"3534","HIGD2A",939.534974446978,-0.46144380589784,0.307802586685359,-  
1.49915506190835,0.133833409968373,0.583439483784637  
"3535","AC008033.3",2.74747708311416,1.53416573756804,1.02324460636997  
, 1.49931475623468,0.13379199602917,0.583439483784637  
"3536","USP36",95.6896469867524,0.427084589812704,0.284871693342189,1.  
49921736625369,0.133817251243118,0.583439483784637  
"3537","SRGAP2C",213.540666158102,0.287369703017171,0.191726216130838,  
1.4988545062667,0.133911380728098,0.583449387768125  
"3538","AC026124.2",17.6064553838565,-0.648877035992225,0.432880650616  
741,-1.49897445189048,0.133880259976668,0.583449387768125  
"3539","LINC00891",49.0226353958087,0.541178700872118,0.36119084555807  
5,1.49831787689952,0.134050681586114,0.583891284727309  
"3540","AC021092.1",3.5888929344032,1.42331586514258,0.950238523145949  
, 1.49785115049895,0.134171927796348,0.584254312706414  
"3541","BCL3",111.634652877576,-0.486987736660721,0.325197982737772,-1  
.49751155453326,0.134260201345953,0.584473596088073  
"3542","ANKRD28",484.613643742525,-0.472018810408914,0.315314337329879  
, -1.49697858462773,0.134398830473897,0.58452555419224  
"3543","PPP3CA",393.565899798603,-0.377414958741685,0.252133977560061,  
-1.49688257962686,0.134423813792507,0.58452555419224  
"3544","HMBS",28.3092306353579,-0.590174424733848,0.394256556238535,-1  
.49692989347976,0.134411500890788,0.58452555419224  
"3545","SPIRE2",7.19365259130753,-0.909243097074658,0.607365398379286,



-1.49702814730788,0.134385934215239,0.58452555419224  
"3546","CWC22",232.033394588256,0.263673877378885,0.176235994996877,1.  
49614088417953,0.134616945756106,0.584572515834804  
"3547","SETD2",230.6059285641,0.330897243881364,0.221171299304952,1.49  
611294467787,0.134624225184142,0.584572515834804  
"3548","COA4",294.717052842438,-0.333946794524525,0.223191565407688,-1  
.49623393659401,0.134592703840244,0.584572515834804  
"3549","PXN-  
AS1",34.1322347351118,0.566035335138671,0.378247990530602,1.4964662055  
2998,0.134532208109905,0.584572515834804  
"3550","HEXIM1",234.910470637937,0.356852553888789,0.238495586832487,1  
.49626480987857,0.134584661510692,0.584572515834804  
"3551","NOC2L",105.74006474498,-0.282491275835736,0.188878996082366,-1  
.49562037968768,0.134752609282118,0.584639795544602  
"3552","ARNT",230.002355861811,0.285691158099051,0.190985194156871,1.4  
9588118262398,0.134684620784376,0.584639795544602  
"3553","ZNF658",17.9817946686548,0.542485089882525,0.362787143550804,1  
.49532611484772,0.134829352783721,0.584639795544602  
"3554","NOC3L",141.333434499781,-0.292650714834689,0.195706937112122,-  
1.4953517701165,0.134822660612746,0.584639795544602  
"3555","ABHD12",173.569530534537,-0.364258492064384,0.243576399534936,  
-1.49545888994118,0.134794721204836,0.584639795544602  
"3556","KLHL9",135.795452785971,0.282572834622785,0.189031866489565,1.  
49484232405007,0.134955597576852,0.585022648101006  
"3557","HNRNPLL",118.636447872626,-0.322225280476314,0.215704154182346  
, -1.49382973961605,0.135220126289317,0.585483722820261  
"3558","NISCH",152.634859882441,0.339845941080454,0.227545629780835,1.  
49352875468443,0.135298833124893,0.585483722820261  
"3559","FAM20C",192.373463488846,-0.220120105563084,0.147359480267457,  
-1.4937627709026,0.135237635386212,0.585483722820261  
"3560","SFRP4",1944.21515610344,-1.00806520725216,0.674643809047099,-1  
.49421842123772,0.13511853932389,0.585483722820261  
"3561","LINC01257",3.05342163233508,1.45208906591756,0.972232695357996  
, 1.49356123575218,0.135290337700517,0.585483722820261  
"3562","NEK3",48.2451921406076,0.400537934671557,0.26816577709878,1.49  
362062156058,0.13527480640586,0.585483722820261  
"3563","GTF2F1",187.738322872463,-0.290816914117699,0.194732441704664,  
-1.49341789982154,0.135327830321673,0.585483722820261  
"3564","ADGRA3",61.0200711297559,0.44987954926046,0.301338911049981,1.  
49293547153571,0.135454078877776,0.585865495482859  
"3565","USP30",36.5777140370919,0.506930727753888,0.339625432643309,1.  
49261709822035,0.135537445063159,0.586061631317978  
"3566","ATPCKMT",39.9858661556842,0.43440312050548,0.291071575098988,  
1.49242714737002,0.135587202645553,0.586112374868537  
"3567","ARHGAP30",9.12549723214677,-0.848809089124419,0.56903386647439  
4, -1.49166708544686,0.135786441880009,0.586315966829227  
"3568","MMAA",30.8484086694979,0.457469330354169,0.306680473678195,1.4  
9168065663743,0.135782882407422,0.586315966829227  
"3569","MLF2",412.790899902593,-0.311615431233653,0.208867082046059,-1  
.49193174999657,0.135717038256818,0.586315966829227

"3570", "FAM217B", 108.447837212665, 0.349633409717319, 0.234382114466375, 1.49172393342956, 0.135771532185552, 0.586315966829227  
"3571", "KBTBD11", 11.2001726901879, 0.981078131853539, 0.657866020558441, 1.49130385396822, 0.13588173756335, 0.586342603584071  
"3572", "SLC25A32", 77.8974416305478, -0.314139763842936, 0.210675651454578, -1.49110617042837, 0.135933622573343, 0.586342603584071  
"3573", "ZNF518A", 133.598176675351, 0.325933155701145, 0.218530698649956, 1.49147537492308, 0.135836731707885, 0.586342603584071  
"3574", "SUN2", 205.452356371486, -0.291911536362408, 0.195774015047694, -1.49106374659218, 0.135944759338921, 0.586342603584071  
"3575", "TET2", 76.0027284400309, 0.406718817497751, 0.272839259234722, 1.49069022778666, 0.136042842912977, 0.586437478608375  
"3576", "RAMP2", 2060.52721753359, -0.462037911515071, 0.309936965451215, -1.4907480004601, 0.136027668619235, 0.586437478608375  
"3577", "TSPAN15", 53.1256140173653, -0.80200612500971, 0.538149984291977, -1.49030223621557, 0.136144784784275, 0.586712848042941  
"3578", "NUFIP2", 462.767951806891, 0.377169890326867, 0.253113141473322, 1.49012369777182, 0.13619171422698, 0.586751055005282  
"3579", "DPYSL3", 770.375330504592, -0.376750812783719, 0.2528850134053, -1.48981075513517, 0.13627400239975, 0.586941533107613  
"3580", "TPM4", 1159.1292916263, -0.437575436828034, 0.293761424836475, -1.48956057478144, 0.136339814849941, 0.587060962545207  
"3581", "IGBP1", 593.745590715469, -0.373086398196288, 0.250491929798772, -1.4894148426099, 0.136378162464606, 0.587062098406002  
"3582", "SERTAD2", 174.693484685676, -0.290088068227827, 0.194894440959273, -1.48843685227762, 0.136635723929709, 0.587490012440369  
"3583", "CBWD2", 46.9101222286842, -0.709758530243898, 0.476887653843095, -1.48831391319143, 0.136668127448016, 0.587490012440369  
"3584", "BOC", 447.841135350966, 0.489143603594524, 0.3285350554142, 1.48886274244871, 0.136523516293954, 0.587490012440369  
"3585", "LRRC10B", 15.4512885395935, 0.916663593960154, 0.615793883032519, 1.48858833973144, 0.136595803964388, 0.587490012440369  
"3586", "ADCY4", 2.99560334043274, -1.3552606546045, 0.910443478741328, -1.48857198304954, 0.136600113842795, 0.587490012440369  
"3587", "ABHD17A", 423.893126297767, -0.306541018901428, 0.206013907756874, -1.48796274115236, 0.136760719847232, 0.587687799100719  
"3588", "SLC27A1", 155.731206708442, 0.302391449756014, 0.20324051269433, 1.48785026049804, 0.136790387490975, 0.587687799100719  
"3589", "H6PD", 357.727550908954, 0.375033633063314, 0.252230352328842, 1.48686956030719, 0.137049265188902, 0.587817034748727  
"3590", "ZBTB9", 6.98833818370964, 0.92284889666284, 0.620627290046757, 1.48696151694089, 0.137024975138176, 0.587817034748727  
"3591", "ORC5", 32.813580423441, 0.415494271520182, 0.279427003307102, 1.48695103409006, 0.137027743981977, 0.587817034748727  
"3592", "TMEM68", 56.5963497910029, 0.334354285866712, 0.224829680958957, 1.48714477750716, 0.136976577349837, 0.587817034748727  
"3593", "FZD4", 222.837819235641, 0.420176818452092, 0.28246252462496, 1.48754890231893, 0.136869897518875, 0.587817034748727  
"3594", "PPTC7", 140.212095896611, -0.378738268304346, 0.254627533331415, -1.48742071742647, 0.136903728494195, 0.587817034748727

"3595", "AC107027.3", 3.01337084554186, 1.40971762623085, 0.94845822483315  
9, 1.48632547994281, 0.137193050247157, 0.588106470956599  
"3596", "GPR108", 214.770482335287, -0.296173620750995, 0.199265060670957,  
-1.48632991530844, 0.137191877635214, 0.588106470956599  
"3597", "IDS", 460.673654542415, -0.337533015172864, 0.227150774120666, -1.  
48594261445731, 0.137294300496264, 0.588376881331639  
"3598", "FLG-  
AS1", 5.53243540965871, 1.05366317631537, 0.710349239369354, 1.48330302605  
914, 0.137993918734206, 0.58842352187715  
"3599", "MNDA", 11.2863293622032, -0.765633026403194, 0.515605145023516, -1  
.48492123050532, 0.137564691346024, 0.58842352187715  
"3600", "MCFD2", 377.56985703559, 0.270039035681837, 0.182205931480419, 1.4  
8205403352007, 0.138325918230085, 0.58842352187715  
"3601", "PSMD14", 235.118561087888, -0.371245142422402, 0.250314624094024,  
-1.48311407599963, 0.138044104808865, 0.58842352187715  
"3602", "A0X1", 402.326603773104, 0.268836565480827, 0.180962640376222, 1.4  
8559152829509, 0.137387197224597, 0.58842352187715  
"3603", "RPSA", 5467.27667271199, -0.337113982605491, 0.227430565658092, -1  
.4822721019491, 0.138267908318916, 0.58842352187715  
"3604", "ALPK1", 83.5697515301415, 0.388503529891206, 0.262001040720181, 1.  
4828320102214, 0.138119049053176, 0.58842352187715  
"3605", "DDX60", 57.1476302449917, 0.408355067602982, 0.275422836173573, 1.  
4826478198984, 0.138168004929457, 0.58842352187715  
"3606", "PLK2", 144.763217968178, -0.559900470623188, 0.377737246836898, -1  
.48224850822017, 0.138274183747572, 0.58842352187715  
"3607", "CYSTM1", 723.137071637893, -0.364097190485486, 0.245244523696079,  
-1.48462923859901, 0.137642065746821, 0.58842352187715  
"3608", "PHYKPL", 323.403907513987, 0.239948864650939, 0.161964164169345, 1  
.48149355063541, 0.138475102251025, 0.58842352187715  
"3609", "RACK1", 9301.40718571991, -0.374171154691061, 0.252250470161092, -  
1.48333184256151, 0.137986266164015, 0.58842352187715  
"3610", "TREM1", 6.93531690062072, -0.938134000023519, 0.632064162401658, -  
1.48423855650807, 0.137745644354562, 0.58842352187715  
"3611", "DDHD2", 96.3281511683564, 0.315501214972298, 0.212777714018578, 1.  
48277377838899, 0.138134525024591, 0.58842352187715  
"3612", "THEM6", 20.0190682165515, -0.636441079933351, 0.428808229348763, -  
1.48420910881287, 0.137753454035425, 0.58842352187715  
"3613", "C9orf40", 45.8490340762199, 0.474187317101663, 0.320021842154691,  
1.48173422760454, 0.138411025958163, 0.58842352187715  
"3614", "GDI2", 840.042526289943, -0.235416614171829, 0.158464624308583, -1  
.48560989683978, 0.137382335741366, 0.58842352187715  
"3615", "RPLP2", 10259.5835369392, -0.24419406229425, 0.164907837026268, -1  
.48079112974693, 0.13866224096663, 0.58842352187715  
"3616", "IGF2-  
AS", 3.94385188164333, 1.32459391320081, 0.894018250430268, 1.481618426204  
74, 0.138441853328181, 0.58842352187715  
"3617", "C11orf91", 3.66853462801378, -1.62738203578075, 1.09610047586238,  
-1.48470151379177, 0.137622910551732, 0.58842352187715  
"3618", "HSPB2", 603.446056524107, -0.309957896032288, 0.209228427515917, -  
1.48143299508719, 0.138491227769718, 0.58842352187715

"3619", "GLT8D2", 400.059637060605, 0.386764073936654, 0.260884422403305, 1.48251118397077, 0.138204329979404, 0.58842352187715  
"3620", "PSME2", 368.894999463896, -0.436237024057775, 0.294067183019703, -1.48346041057069, 0.137952127361786, 0.58842352187715  
"3621", "TRMT5", 73.8479986848284, 0.34239258871219, 0.231219655446764, 1.48081091138475, 0.138656968085376, 0.58842352187715  
"3622", "SMAD6", 66.009850933014, 0.555748874792178, 0.374514956417499, 1.48391637041231, 0.137831108335324, 0.58842352187715  
"3623", "NR2F2", 398.611579041288, 0.336859927198002, 0.227490953808906, 1.48076185693505, 0.138670044044845, 0.58842352187715  
"3624", "UNKL", 90.8080252926461, 0.4041844318469, 0.272388911358428, 1.48385053499864, 0.137848577049021, 0.58842352187715  
"3625", "NPIP5", 47.8278483828935, 0.64858008133663, 0.437408309713582, 1.48277951500584, 0.138133000374411, 0.58842352187715  
"3626", "ZNF668", 53.6565249829788, -0.457280524961716, 0.308573239780364, -1.48191892883258, 0.138361867782142, 0.58842352187715  
"3627", "LPCAT2", 54.0602163701632, -0.378867707847714, 0.255778934206756, -1.48123108348501, 0.138545005870345, 0.58842352187715  
"3628", "ZNF532", 170.740151045112, 0.280446396054647, 0.189224101200739, 1.48208602537968, 0.138317406677702, 0.58842352187715  
"3629", "PHLPP1", 60.5505485411177, 0.412073572241439, 0.277671982365127, 1.48403007293541, 0.137800942621425, 0.58842352187715  
"3630", "PAF1", 186.380108971981, 0.266450837073181, 0.17994597738147, 1.48072683229994, 0.138679380796606, 0.58842352187715  
"3631", "ZBED1", 177.709522191106, 0.339339609701675, 0.228471754900029, 1.48525847254142, 0.137475367936334, 0.58842352187715  
"3632", "MSL3", 88.7208045853128, -0.300546042415122, 0.202651371211181, -1.48306937485228, 0.138055979713077, 0.58842352187715  
"3633", "BEX3", 876.283239419175, 0.427317749276257, 0.28800680874372, 1.48370710796807, 0.137886639766567, 0.58842352187715  
"3634", "AL034417.3", 31.5855533080407, 1.59295333776572, 1.07598103950574, 1.48046599268836, 0.138748929792829, 0.588491359918137  
"3635", "PAM16", 138.148273138807, -0.36576666692832, 0.247076112203147, -1.48038053402583, 0.138771721913878, 0.588491359918137  
"3636", "C2orf49", 156.686020672003, 0.28973605699447, 0.195806494570142, 1.47970606200031, 0.138951707143221, 0.588524869078248  
"3637", "PLPP5", 143.335875386676, -0.362894525136394, 0.245238431875869, -1.47976205181445, 0.138936759225731, 0.588524869078248  
"3638", "ZNRD2", 163.46864362452, -0.400318824576511, 0.270475005934096, -1.48005847414254, 0.138857642311931, 0.588524869078248  
"3639", "AC004803.1", 3.27861587121943, -1.15397067501752, 0.779708732843934, -1.48000224495176, 0.138872647556017, 0.588524869078248  
"3640", "SLC46A1", 21.587205058832, 0.597615016603405, 0.403893371872872, 1.47963561232074, 0.13897051725234, 0.588524869078248  
"3641", "PLSCR3", 142.34378124619, -0.278898821093595, 0.188535482959763, -1.47929088315496, 0.139062588433353, 0.588753035072821  
"3642", "REL", 99.917021516993, -0.408596020802152, 0.276303167948168, -1.47879600453514, 0.139194844034836, 0.589151158922845  
"3643", "TRRAP", 92.6837484183857, 0.3121143451302, 0.211098782181443, 1.47852271768168, 0.139267921049962, 0.589298655774133

"3644", "TBC1D24", 57.08487025278, 0.384465395401272, 0.260087053669559, 1.47821811957521, 0.139349405510074, 0.589481637194784  
"3645", "RSPH3", 20.0947323520506, -0.793109333893349, 0.536597643098172, -1.47803357710285, 0.13939879117887, 0.589528769827787  
"3646", "SH3D19", 837.619530643682, 0.268430287453424, 0.181636082251882, 1.4778467148459, 0.139448811375833, 0.589578559341322  
"3647", "TSEN15", 59.9662912358118, -0.468828016378553, 0.317374912830015, -1.47720565623174, 0.139620518068782, 0.590142661373805  
"3648", "FABP3", 59.1406185108668, -0.566109498644022, 0.383269158636267, -1.47705466481657, 0.139660984585112, 0.590151885246575  
"3649", "TRIP12", 274.721994820899, 0.354059423484289, 0.239775743198615, 1.47662736339016, 0.139775552598119, 0.5903123680274  
"3650", "LRRC20", 18.4603905165068, 0.576812650015412, 0.390615847887909, 1.47667498165854, 0.139762781613365, 0.5903123680274  
"3651", "FHIT", 46.3516985311564, 0.559379097037928, 0.378904098673936, 1.4763078546672, 0.139861266491376, 0.590512578188049  
"3652", "MYSM1", 139.454705560466, 0.388011000043441, 0.263015148171488, 1.4752420259477, 0.140147486501661, 0.591293730058535  
"3653", "ZNF507", 82.5744948088656, 0.365218632956721, 0.247577782901245, 1.47516723300814, 0.140167588471009, 0.591293730058535  
"3654", "ZFP30", 30.3413012515926, 0.65078273908605, 0.441194361912996, 1.47504772333057, 0.140199713484525, 0.591293730058535  
"3655", "RBBP9", 50.6580936817552, 0.353805437507889, 0.239801274476882, 1.47541099720885, 0.140102080552331, 0.591293730058535  
"3656", "MAGOH", 351.042213531977, -0.369173790383654, 0.250348472423925, -1.4746396764847, 0.140309441933948, 0.591419242868403  
"3657", "ZP3", 2.35794100725346, -1.39158322486965, 0.943638748832585, -1.47469911191251, 0.140293454960792, 0.591419242868403  
"3658", "C9orf92", 6.82709895320236, -1.20457176547163, 0.816930716786462, -1.47450908714759, 0.14034457284545, 0.591419242868403  
"3659", "AHI1", 410.14330677315, -0.339787177528346, 0.230491671030365, -1.47418419073192, 0.14043200525715, 0.591625952729973  
"3660", "SNAPC5", 126.525944718943, -0.358252438880887, 0.243085414969116, -1.4737718382915, 0.14054303315299, 0.591931927883427  
"3661", "C4orf46", 49.7474175350806, 0.530339271048197, 0.359972330667011, 1.47327787684543, 0.140676123523642, 0.592167001504178  
"3662", "AP4M1", 83.3069375453269, -0.326073815568557, 0.221331537783403, -1.4732370218638, 0.140687135612481, 0.592167001504178  
"3663", "PRKX", 29.1417167424989, 0.56756418335374, 0.385275893593513, 1.47313702412057, 0.140714091891651, 0.592167001504178  
"3664", "EFNA3", 4.73465744439309, -0.976133002825129, 0.66275852514896, -1.472833567257, 0.140795918729566, 0.592349641707495  
"3665", "TEX10", 39.7620839270669, 0.382067246237294, 0.259456752238431, 1.47256620974809, 0.140868041723989, 0.592491367851376  
"3666", "AL035071.1", 29.9670155387731, 0.623287502921777, 0.423319904108756, 1.47237939173691, 0.140918455048498, 0.592541730652646  
"3667", "LINC00242", 4.80454497029079, -1.09672649575999, 0.745021864098029, -1.47207289961585, 0.14100119278375, 0.592727948394195  
"3668", "ZNF385B", 67.3296645162835, 0.70340778670518, 0.477928138664814, 1.47178567194283, 0.14107876396071, 0.592730756733263

"3669", "AKR1B1", 310.318099248542, -0.254565874012682, 0.17296317904432, -1.47179229370809, 0.141076975260471, 0.592730756733263  
"3670", "FIS1", 1048.9376296685, -0.376811710379815, 0.256109617783966, -1.47129074511237, 0.141212505114549, 0.592969426951994  
"3671", "ZNF888", 6.31215627788267, -0.880858480763097, 0.598645755643061, -1.47141856842681, 0.141177954845426, 0.592969426951994  
"3672", "GTF2E1", 29.5641273687663, 0.459983413454089, 0.312796311121693, 1.47055255160964, 0.141412163815787, 0.593484482771672  
"3673", "EYA1", 3.70121956204609, 1.90465340553517, 1.29507317363713, 1.47069172947662, 0.14137450388664, 0.593484482771672  
"3674", "UNC93B1", 72.3122509496254, -0.368544295477848, 0.250744368638852, -1.46980088716833, 0.14161568882328, 0.594072140722509  
"3675", "COX6A1", 1171.36496699667, -0.351100023074207, 0.238884053310598, -1.4697507774523, 0.141629264817076, 0.594072140722509  
"3676", "YWHAB", 1802.21502370308, -0.267066205755636, 0.181742916107941, -1.46947243653238, 0.141704692639634, 0.594226832709455  
"3677", "CCNL2", 229.619332133215, 0.351810965516995, 0.239588751763337, 1.46839516850319, 0.141996913228361, 0.595290295734344  
"3678", "AL117339.4", 4.96884464717095, 1.30265091152668, 0.887450380794068, 1.46785774136589, 0.142142869082888, 0.595416393182806  
"3679", "AL731569.1", 2.82685160132481, 1.39490977368299, 0.950219649924309, 1.46798666370887, 0.142107845519225, 0.595416393182806  
"3680", "DEF8", 145.699726753011, -0.368616500955859, 0.251081599406921, -1.46811435735063, 0.142073162282846, 0.595416393182806  
"3681", "AFF4", 529.159197659803, 0.378296567861441, 0.257914407388801, 1.46675236832026, 0.14244343130633, 0.595469949107624  
"3682", "TUBB2A", 425.528606560776, -0.504094265884791, 0.343684376445955, -1.46673605328714, 0.142447871181751, 0.595469949107624  
"3683", "FKBP9", 970.910798305006, 0.312994634331646, 0.213396457827636, 1.46672834927962, 0.142449967741156, 0.595469949107624  
"3684", "EXT2", 264.000615423328, 0.273942818181661, 0.186686560613393, 1.46739442454546, 0.142268790318266, 0.595469949107624  
"3685", "CIB1", 578.824173447332, -0.311183097965413, 0.212169195737224, -1.46667425911733, 0.14246468844041, 0.595469949107624  
"3686", "AC005632.6", 2.42733790389181, 1.70849242885419, 1.16474135613648, 1.46684276286141, 0.142418833802225, 0.595469949107624  
"3687", "CCDC124", 307.086861254679, -0.370228843376633, 0.252274870707222, -1.4675613244345, 0.142223420043106, 0.595469949107624  
"3688", "CFAP410", 151.169145295926, -0.362775575198273, 0.247331786739844, -1.46675678035617, 0.142442230659547, 0.595469949107624  
"3689", "SOAT1", 125.643903531668, 0.37314908324314, 0.254446759135504, 1.466511440393, 0.142509006790582, 0.595483190095074  
"3690", "PIR", 71.6978321086367, 0.404043167405744, 0.275538056967714, 1.46637880753107, 0.142545116539139, 0.595483190095074  
"3691", "SRP19", 289.778459338581, -0.322855038143799, 0.22021480292396, -1.46609144279588, 0.142623376662525, 0.595648699878846  
"3692", "HLA-DOB", 3.01682564678551, 1.50992683656111, 1.03006862796349, 1.46585071671033, 0.142688960727823, 0.595761194371451  
"3693", "AL354743.1", 3.21055205882377, -1.4966241425063, 1.02125371607344

, -1.46547730397553, 0.142790740104195, 0.59587138710016  
"3694", "GAPLINC", 13.2308691803517, 0.912087366642689, 0.622385453746976,  
1.46547025023096, 0.142792663246707, 0.59587138710016  
"3695", "MREG", 15.8798235072205, -0.593529588664307, 0.40518449165944, -1.  
46483787233192, 0.142965156411583, 0.596107083063173  
"3696", "PDZD2", 12.1281863605523, 0.753968554020782, 0.514677701360153, 1.  
46493339817958, 0.142939089661669, 0.596107083063173  
"3697", "ZNF616", 32.3494015454121, 0.502038005254898, 0.342685638886003, 1.  
46501034267708, 0.142918095976057, 0.596107083063173  
"3698", "FAHD2B", 42.9280018778865, -0.640848948757293, 0.437874332475856,  
-1.46354536273859, 0.143318210478478, 0.596132251203034  
"3699", "STAM2", 161.9809481215, 0.233748856514887, 0.159631986884409, 1.46  
429835947696, 0.14311244522703, 0.596132251203034  
"3700", "WDR17", 7.33478016567112, -1.13679023864162, 0.776557637738673, -1.  
46388391974604, 0.143225667712971, 0.596132251203034  
"3701", "CDKN2AIP", 170.894833711736, 0.285826894968116, 0.195294324535451,  
1.46356989967843, 0.143311501894426, 0.596132251203034  
"3702", "CITED2", 1024.149250192, 0.470661613828565, 0.321554546452101, 1.4  
637069169808, 0.143274044761181, 0.596132251203034  
"3703", "WEE2-  
AS1", 4.99941082219798, 1.15880118663305, 0.791778789191715, 1.46354158819  
538, 0.143319242488384, 0.596132251203034  
"3704", "FOSL1", 33.1467959097955, -1.4146471871681, 0.966517700524057, -1.  
46365367794202, 0.143288598102046, 0.596132251203034  
"3705", "DEXI", 271.03195205777, -0.338159512402963, 0.231001133294314, -1.  
46388681120504, 0.14322487754546, 0.596132251203034  
"3706", "CLDN7", 5.70692271777411, -1.09081344675945, 0.744785918217164, -1.  
46459998783354, 0.143030085331575, 0.596132251203034  
"3707", "ATG2B", 78.4467598164982, 0.346319958564944, 0.236707291697516, 1.  
46307262476519, 0.143447507638326, 0.596183157251223  
"3708", "USB1", 56.5297667968944, -0.41640389651418, 0.284603803543846, -1.  
46310025139924, 0.143439949098748, 0.596183157251223  
"3709", "NDC80", 9.73087966856038, -0.746342408518437, 0.510085949050304, -  
1.46316990285265, 0.143420894088196, 0.596183157251223  
"3710", "RASSF8-  
AS1", 172.453760322201, -0.234433229366969, 0.160253249365163, -1.46289220  
527925, 0.143496877220671, 0.596227590931712  
"3711", "TEX41", 7.14176903635064, -0.850537436497784, 0.581468647515878, -  
1.46273997769511, 0.143538542570949, 0.596239998310746  
"3712", "RERE", 346.568757642276, 0.372735810963505, 0.255104297901477, 1.4  
6111145139334, 0.143984858093298, 0.596326326573936  
"3713", "NOTCH2NLC", 25.3641766963684, 0.554906936524095, 0.37947879505172  
4, 1.46228707311158, 0.143662559393485, 0.596326326573936  
"3714", "NDUFS6", 666.445483305534, -0.400547771955342, 0.273985449682815,  
-1.46193081573873, 0.14376016947651, 0.596326326573936  
"3715", "DUSP22", 226.059244765388, 0.258565563190729, 0.176885023171795, 1.  
46177193837154, 0.143803716290946, 0.596326326573936  
"3716", "AL159169.2", 3.68083985782864, 1.34809660828141, 0.92217869747818  
5, 1.46186049620096, 0.14377944216276, 0.596326326573936  
"3717", "ADAMTSL2", 5.23228282713433, -1.20320346943986, 0.823273069355928

, -1.46148770587281, 0.143881647020033, 0.596326326573936  
"3718", "ZDHC16", 59.8010606093195, -0.429790403664919, 0.294129092398612  
, -1.46123050990976, 0.143952192790515, 0.596326326573936  
"3719", "PITPNM2", 39.4874783401709, 0.37654376589322, 0.25755205595835, 1.  
462010328328, 0.143738379609719, 0.596326326573936  
"3720", "FLT3LG", 108.291280454927, -0.375712172847619, 0.257025843235254,  
-1.46176807794278, 0.14380477452457, 0.596326326573936  
"3721", "HCK", 5.46505211876951, -1.11648791285938, 0.76409739686827, -1.46  
118533767477, 0.143964585730781, 0.596326326573936  
"3722", "CHADL", 35.8578924946797, 0.546526017367248, 0.373948005761441, 1.  
46150269274575, 0.14387753711789, 0.596326326573936  
"3723", "HMOX2", 198.104026204929, -0.328597660432011, 0.224946797170213, -  
1.46077945792385, 0.144075974978976, 0.596543420440752  
"3724", "AL513166.1", 9.14165037395868, 0.739194433920735, 0.5071992357907  
37, 1.4574044709833, 0.145004763653484, 0.596753721267641  
"3725", "TIMM17A", 134.7135606675, -0.293703824426095, 0.201505195028374, -  
1.4575496397735, 0.144964719363123, 0.596753721267641  
"3726", "TAF1A-  
AS1", 2.99600950036464, 1.47264619232473, 1.01106139154355, 1.456534889613  
87, 0.145244811981394, 0.596753721267641  
"3727", "AC007389.5", 4.31508308010042, 1.29498945403357, 0.88863656504820  
4, 1.4572768046781, 0.14503998694836, 0.596753721267641  
"3728", "TMEM237", 195.941718974529, -0.316306836216204, 0.21705289089089,  
-1.45727999713769, 0.145039106064836, 0.596753721267641  
"3729", "ATP6V1A", 133.304262520214, 0.290170925096322, 0.198995663049532,  
1.45817713134831, 0.144791725506215, 0.596753721267641  
"3730", "OPA1", 120.316399457304, 0.252832160829308, 0.173230169182373, 1.4  
5951575307377, 0.144423208057509, 0.596753721267641  
"3731", "TMEM170B", 18.69754448828, 0.601452928197936, 0.412716542083032, 1.  
.45730269293866, 0.145032843814849, 0.596753721267641  
"3732", "MYO6", 115.840274854737, -0.365745427318461, 0.251109415863953, -1.  
.45651817181008, 0.145249429918663, 0.596753721267641  
"3733", "FAM162B", 9.78755330479166, 0.998940092117001, 0.68471899047705, 1.  
.45890519470043, 0.14459120318332, 0.596753721267641  
"3734", "DOK2", 10.4529501906961, -0.873766745286662, 0.599058949583351, -1.  
.4585655483394, 0.144684721673476, 0.596753721267641  
"3735", "UBAP1", 131.090065923641, 0.326984772264235, 0.224393899217467, 1.  
45719100833193, 0.145063661950719, 0.596753721267641  
"3736", "GARNL3", 34.4638669622627, -0.458175173478151, 0.314207916536154,  
-1.45819105555678, 0.144787888520209, 0.596753721267641  
"3737", "ADIRF-  
AS1", 10.8079105254446, -0.770212124562562, 0.527394886475755, -1.46040878  
346281, 0.144177760236447, 0.596753721267641  
"3738", "SBF2-  
AS1", 30.3809669188916, 0.554725789568643, 0.380654189302926, 1.4572959004  
7199, 0.145034717977893, 0.596753721267641  
"3739", "NDUFV1", 395.403579430902, -0.338892440342578, 0.232186298547295,  
-1.45957122561884, 0.144407952204033, 0.596753721267641  
"3740", "METTL1", 27.0655767697731, -0.518210365111341, 0.35493083962741, -  
1.46003194778829, 0.14428129382755, 0.596753721267641



"3741", "GPC6", 143.577648358986, 0.554052658826145, 0.380322135976765, 1.45679834649434, 0.145172052476744, 0.596753721267641  
"3742", "SNF8", 522.274644812271, -0.394576011205292, 0.27054500299975, -1.45844871215625, 0.144716902149473, 0.596753721267641  
"3743", "LSM7", 580.80380756716, -0.383874159893623, 0.263134909444558, -1.45884922948433, 0.144606609500689, 0.596753721267641  
"3744", "ANGPTL4", 821.502203375162, -0.580687898519557, 0.398633084286447, -1.45669770375178, 0.14519984392307, 0.596753721267641  
"3745", "AC020916.1", 1027.55073331363, -0.478273171871967, 0.327685251300648, -1.45955049845425, 0.144413652367379, 0.596753721267641  
"3746", "ZNF780A", 45.3674279611211, 0.41522723858715, 0.284466672349482, 1.45966919483989, 0.144381012089373, 0.596753721267641  
"3747", "UBOX5", 26.8815935616364, 0.500718662388866, 0.343714532364628, 1.4567864179152, 0.145175346216929, 0.596753721267641  
"3748", "ACSS1", 24.7827329902611, 0.672182869208574, 0.461092059274987, 1.45780621393806, 0.144893965018365, 0.596753721267641  
"3749", "MATN4", 47.2464736886864, 0.699548503810669, 0.479252531681682, 1.45966574523034, 0.144381960616524, 0.596753721267641  
"3750", "AP001627.1", 6.61814114508844, 1.01204373793422, 0.694711216532895, 1.45678335666586, 0.145176191503694, 0.596753721267641  
"3751", "CARD10", 3.47199650920272, -1.2174239734735, 0.835488650642336, -1.45714004916467, 0.145077725237517, 0.596753721267641  
"3752", "PHF5A", 194.433264898579, -0.378705019498503, 0.259787145980156, -1.45775118345321, 0.144909138307407, 0.596753721267641  
"3753", "SH3BP5", 1511.8255555436, 0.224165923329292, 0.153937790171211, 1.45621112970359, 0.14533426376094, 0.596906387087457  
"3754", "ESR2", 4.4324045145123, 1.35276586100816, 0.929031445635403, 1.45610341540479, 0.145364033546955, 0.596906387087457  
"3755", "ST8SIA1", 127.312427324, 0.559952674670097, 0.384640131003903, 1.45578328815725, 0.145452537011236, 0.597110747810442  
"3756", "HIPK1", 175.551197593378, 0.333991789886702, 0.229488398602711, 1.4553754870411, 0.14556533884249, 0.597371140914487  
"3757", "CMYA5", 87.7241848872732, 0.651678067013966, 0.447854725070087, 1.45511039748879, 0.145638701154416, 0.597371140914487  
"3758", "FBX038", 52.9362839581625, 0.382374923215148, 0.262827037032232, 1.45485383670118, 0.145709730122509, 0.597371140914487  
"3759", "AC092111.1", 4.28395687619418, 1.18283201825087, 0.813011220324702, 1.45487785245876, 0.145703080224518, 0.597371140914487  
"3760", "LAMP2", 900.769637107291, 0.287354298024941, 0.197484197962448, 1.45507489201532, 0.145648529279796, 0.597371140914487  
"3761", "ZNF333", 56.2781998713219, 0.42657137876587, 0.293307100005269, 1.45435067462808, 0.145849107768839, 0.597783567204641  
"3762", "DLD", 130.069981442605, 0.310143717749975, 0.21327560932696, 1.45419215412726, 0.145893039633484, 0.597804679944218  
"3763", "IFNGR2", 563.917772487894, -0.258348648713611, 0.17769988692943, -1.45384813225125, 0.145988415598991, 0.598036520451356  
"3764", "WDR6", 111.348642143438, 0.302173223934458, 0.207923284446199, 1.45329189436042, 0.146142726874798, 0.598350633406377  
"3765", "PSMC3", 541.137062629731, -0.320348483981948, 0.220423641473854, -1.4533308761254, 0.146131908504654, 0.598350633406377

"3766", "SPRYD3", 344.257699785027, -0.259316041585799, 0.178547610113545, -1.45236355401727, 0.146400544615472, 0.599111887823325  
"3767", "METRN", 148.051171342829, -0.494344761396774, 0.340377529910134, -1.45234252545193, 0.146406388675346, 0.599111887823325  
"3768", "NCKAP1", 391.122384565674, 0.2500599631273, 0.172227969084664, 1.45191262752669, 0.146525900964483, 0.599158688422716  
"3769", "NBR1", 262.719928215345, 0.255581578923177, 0.176006649380701, 1.45211320039595, 0.146470132111878, 0.599158688422716  
"3770", "PTTG1IP", 632.663077613393, 0.289788549585677, 0.199595117758612, 1.45188195402727, 0.146534431096571, 0.599158688422716  
"3771", "AC073140.1", 3.42868918161343, 1.27010107971889, 0.875047361805636, 1.4514655265037, 0.146650274900362, 0.599473345953083  
"3772", "TUBA4A", 23.0098343988446, 0.657387797727391, 0.452997906626101, 1.45119389761329, 0.14672587566863, 0.59962337577729  
"3773", "ANAPC7", 83.916322474084, -0.291849472124883, 0.201177712279954, -1.45070479635812, 0.14686207931812, 0.599963233303138  
"3774", "LINC00685", 27.5548977243513, 0.701873503692774, 0.483845215314824, 1.45061577851108, 0.146886879175222, 0.599963233303138  
"3775", "CCN2", 2350.35084256542, -0.483087297592255, 0.33323364799636, -1.44969543290998, 0.147143469898423, 0.600156416014425  
"3776", "DEFB1", 67.5882509045584, 2.34012271851765, 1.6136196653212, 1.45023190334746, 0.146993861261229, 0.600156416014425  
"3777", "MFSD14C", 92.7895374356713, 0.337554690265903, 0.232904067869205, 1.44932930263574, 0.147245641606653, 0.600156416014425  
"3778", "RPS25", 9426.93613909327, -0.311324525902427, 0.214800020785811, -1.44936916096887, 0.147234516175915, 0.600156416014425  
"3779", "CFL2", 316.484689305523, 0.299951383535414, 0.206905154727102, 1.44970473998598, 0.14714087338787, 0.600156416014425  
"3780", "CTSH", 774.739226621737, 0.562251931068695, 0.387904241235303, 1.4494606433747, 0.147208983640536, 0.600156416014425  
"3781", "CRLS1", 135.07680153126, -0.278472852530349, 0.192050529582946, -1.44999783721022, 0.147059122338252, 0.600156416014425  
"3782", "VAMP7", 112.40247397978, 0.2578950642665, 0.177843126162902, 1.45012669216279, 0.147023192944228, 0.600156416014425  
"3783", "FTSJ3", 133.593730581162, -0.356680522490574, 0.246139572788983, -1.44909864939254, 0.14731003516141, 0.600260161779841  
"3784", "PRXL2B", 12.2510028518926, 0.715641421559353, 0.493969217588462, 1.44875712104711, 0.147405422258886, 0.600331462119083  
"3785", "ATG14", 122.335853806496, 0.411919884160327, 0.284299297375023, 1.44889518885078, 0.147366854952606, 0.600331462119083  
"3786", "AL590822.3", 3.67938540082745, -1.12118770161951, 0.774124719993635, -1.44832954259455, 0.147524909255432, 0.600337402293834  
"3787", "CHTOP", 178.660187916984, 0.249967591195208, 0.172620215589055, 1.44807831656455, 0.147595149005514, 0.600337402293834  
"3788", "AC008906.1", 4.84874074192771, 1.16339797463867, 0.803418097375543, 1.44806045375259, 0.147600144204172, 0.600337402293834  
"3789", "SORBS3", 436.475957061141, -0.211035578927315, 0.145716168772061, -1.44826466894989, 0.147543044691968, 0.600337402293834  
"3790", "RAB31", 194.078430890294, -0.319312468903026, 0.220511250521138, -1.44805522688021, 0.147601605883466, 0.600337402293834

"3791", "TOLLIP", 138.535548742163, 0.275263015554216, 0.190150359063607, 1.44760713000883, 0.147726955972603, 0.600688743423284  
"3792", "BTBD2", 204.984315255177, -0.240368318816064, 0.166062895036327, -1.44745350105743, 0.147769950675937, 0.600705113309487  
"3793", "PTDSS1", 78.5556420638746, -0.292526233618719, 0.202140339762646, -1.44714426601936, 0.147856522400091, 0.60074019314639  
"3794", "ZNF264", 165.347056428064, 0.322239739166749, 0.222670775743734, 1.44715775157494, 0.147852746250811, 0.60074019314639  
"3795", "PAAF1", 85.1534990296848, 0.322409002955682, 0.222820307744638, 1.44694622415286, 0.147911985455667, 0.600807182028748  
"3796", "SH3BP4", 69.4548372388299, -0.448004732254988, 0.309722731901647, -1.44647029781867, 0.148045337068277, 0.601184289823502  
"3797", "AL137026.1", 52.5150103568548, 0.49275248251285, 0.340722823141779, 1.44619746329059, 0.148121825024305, 0.601184289823502  
"3798", "CNIH1", 376.641898958534, -0.271485936275583, 0.187721925206428, -1.44621325387029, 0.148117397382057, 0.601184289823502  
"3799", "DERL1", 263.317953296571, -0.273987956655335, 0.189483000133351, -1.44597645415426, 0.148183806089914, 0.601277539056598  
"3800", "TSTD2", 75.8551172719098, 0.345324184187759, 0.23886545170741, 1.44568493149336, 0.148265592671982, 0.601451081852265  
"3801", "SYNP02", 88.3921320019105, 0.560710359271006, 0.387987016108594, 1.44517815285362, 0.14840785130891, 0.601869778460102  
"3802", "AL391001.1", 4.14579575605964, 1.15172434149136, 0.797064518139337, 1.4449574849724, 0.148469827910506, 0.601899295490608  
"3803", "AC021739.2", 3.97369540555297, 1.23513898095233, 0.854841877840988, 1.44487420769772, 0.148493222234887, 0.601899295490608  
"3804", "CCDC80", 14946.9866343561, -0.386557054880517, 0.267634963041703, -1.44434438044735, 0.148642127703317, 0.602163318876837  
"3805", "ARFGF1", 154.707696246267, 0.290305241593179, 0.201039644392626, 1.44401987215128, 0.148733385528724, 0.602163318876837  
"3806", "UBTD1", 45.8805375479732, -0.560889162031065, 0.388432224100284, -1.44398205717932, 0.148744022591197, 0.602163318876837  
"3807", "TPP2", 154.39614935931, 0.279309406125537, 0.193432415909354, 1.44396379899647, 0.148749158686352, 0.602163318876837  
"3808", "SPATA5L1", 33.8621870046468, -0.433617963606916, 0.30030031663448, -1.44394774027064, 0.148753676177943, 0.602163318876837  
"3809", "CTNNBIP1", 98.3491680519176, -0.336215159426366, 0.23340258035605, -1.44049461198534, 0.149727513307985, 0.602472621745024  
"3810", "BCL10", 170.338302615477, -0.310164528122834, 0.215295907971341, -1.44064293207152, 0.149685584960978, 0.602472621745024  
"3811", "SNRPG", 470.571384426197, -0.317873627158356, 0.220322491383257, -1.44276521730778, 0.14908662050405, 0.602472621745024  
"3812", "AC007038.2", 5.89812468843002, 1.02242617488366, 0.708511645446578, 1.44306191924231, 0.149003029415678, 0.602472621745024  
"3813", "RBMS3-AS3", 12.8116218899425, 0.64126512761254, 0.445113472755009, 1.44067786500251, 0.149675711134944, 0.602472621745024  
"3814", "FBXL18", 30.9137573739786, 0.457232646017808, 0.317070853866363, 1.44205195918298, 0.149287716177837, 0.602472621745024  
"3815", "COQ4", 174.822391802696, -0.240799346437062, 0.167048604624753, -1

.44149271391987,0.149445534270334,0.602472621745024  
"3816","WASHC2C",148.027120324347,0.323664390493408,0.224663911379148,  
1.44066035575774,0.149680660077451,0.602472621745024  
"3817","SSRP1",208.61378344912,-0.267658281428741,0.185551168974851,-1  
.44250388131491,0.149160277441803,0.602472621745024  
"3818","FAM168A",109.683287116431,0.334915025847317,0.23208772675789,1  
.44305358377134,0.149005377314545,0.602472621745024  
"3819","COMMD6",1964.96557876918,-0.383983848197446,0.266422537124451,  
-1.44125888275766,0.149511558769968,0.602472621745024  
"3820","COPS3",174.642004948478,-0.328301371625041,0.227474830924988,-  
1.44324262288737,0.148952136548516,0.602472621745024  
"3821","AOC3",13.1555412376247,0.81470024649678,0.565122200488004,1.44  
16355361606,0.149405217969671,0.602472621745024  
"3822","SNHG25",122.912968653671,-0.699194090974122,0.484950261558292,  
-1.44178516107487,0.149362990292016,0.602472621745024  
"3823","PTPRM",92.6143272498108,0.36219504109661,0.251019754599526,1.4  
4289457088528,0.149050172774677,0.602472621745024  
"3824","SMAD2",213.40613597367,0.246879943873585,0.171191156156096,1.4  
4213024444133,0.149265634359095,0.602472621745024  
"3825","C19orf53",873.088718772836,-0.351652345489173,0.24410917767612  
9,-1.44055356229058,0.149710847676072,0.602472621745024  
"3826","RPL18A",13648.1153632338,-0.313327151416555,0.217512500086097,  
-1.44050181618312,0.149725476558848,0.602472621745024  
"3827","ZNF302",219.906045519719,0.330579579128946,0.229295070535058,1  
.44172126490788,0.149381022182052,0.602472621745024  
"3828","BCKDHA",98.7211158391649,-0.389476332545932,0.27025539999954,-  
1.44114172203995,0.149544648605115,0.602472621745024  
"3829","ISOC2",218.466991912184,-0.446200988780389,0.309682126183022,-  
1.44083546015402,0.149631172893407,0.602472621745024  
"3830","DGCR6",24.5474327264944,0.707940498259547,0.490478006216279,1.  
44336848806096,0.148916696075661,0.602472621745024  
"3831","FAM120C",36.5868636752562,0.397512750725116,0.275956746761555,  
1.44048933533991,0.149729005118728,0.602472621745024  
"3832","NKD2",3.30159513756279,1.2716139732638,0.882967727421266,1.440  
15906105378,0.149822402679932,0.602533873548434  
"3833","SETD9",35.0834123898225,-0.446180095673416,0.309784301826945,-  
1.4402927877303,0.149784581045404,0.602533873548434  
"3834","ZNF253",38.4315205351154,0.54110221114613,0.375811137259917,1.  
43982484151845,0.149916961144031,0.602756900374346  
"3835","MPG",561.666590684456,-0.340738527272636,0.236678627239647,-1.  
43966749869486,0.149961492837383,0.602778725446744  
"3836","TOMM70",158.358221060211,0.234748646438018,0.163089580125277,1  
.43938470046766,0.150041556701729,0.60285021135  
"3837","AL445250.1",16.6412903285128,0.636984810917668,0.4425569596491  
69,1.43932842322179,0.150057493412257,0.60285021135  
"3838","SERBP1",1297.18415959882,-0.202925590754649,0.141068748913338,  
-1.43848720795923,0.150295864443723,0.603264052810918  
"3839","PFDN2",393.024896426646,-0.361613426070765,0.251466033391537,-  
1.43802095731842,0.15042810790128,0.603264052810918  
"3840","LIMA1",2173.56851001161,-0.253011521323346,0.175934762532299,-

1.43809851834652,0.150406102986476,0.603264052810918  
"3841","AC073896.2",22.8695270690739,-0.630238234586718,0.438103413097  
588,-1.43856043058567,0.150275104242814,0.603264052810918  
"3842","RPL13",29376.3260727188,-0.347434603455505,0.241604507464057,-  
1.43803030457614,0.150425455851622,0.603264052810918  
"3843","TRIM37",71.6715198236913,0.346103782509494,0.240683737833972,1  
.43800235788361,0.150433385129901,0.603264052810918  
"3844","AC005306.1",5.00220240952856,1.10064845699142,0.76540300416898  
4,1.43799861118447,0.150434448200141,0.603264052810918  
"3845","TUT4",283.648192574928,0.295218507550802,0.205364116476627,1.4  
3753695930808,0.150565478900211,0.603376438479813  
"3846","NTMT1",157.697987097137,-0.29185229342719,0.203029635843001,-1  
.43748616902842,0.150579900021527,0.603376438479813  
"3847","EIF3J",297.502801539031,-0.269066099730033,0.187157062798133,-  
1.43764865566547,0.150533768135543,0.603376438479813  
"3848","CXCL9",49.0586239864872,-1.76490036507503,1.22813861107736,-1.  
43705307296446,0.150702913783377,0.603712426187828  
"3849","MDN1",81.3718598224564,0.406847881493959,0.283142403372914,1.4  
369019851757,0.150745845784262,0.603727516956197  
"3850","WNK2",2.89099202402557,-1.40111818152942,0.975303630466336,-1.  
43659690968185,0.150832562219559,0.603824556809351  
"3851","ZNF98",3.88910599218742,1.52856689483601,1.06406064615103,1.43  
654114111373,0.150848418311567,0.603824556809351  
"3852","AL358472.2",4.69788173387944,1.05276247870308,0.73303152677414  
,1.43617626289005,0.150952191657725,0.603926300130764  
"3853","C17orf75",55.4879611954107,-0.333885554644727,0.23248074368632  
8,-1.4361858507095,0.150949464134051,0.603926300130764  
"3854","DNAJC16",71.3461066461938,0.337187369296968,0.234825429506776,  
1.43590653706114,0.151028938112534,0.604076564868892  
"3855","PGGT1B",128.505105520253,0.28331671379118,0.197350613255663,1.  
43560087864612,0.151115944582587,0.604267778402226  
"3856","RUSC1",149.834087598489,-0.326204937922852,0.22732083725132,-1  
.43499796088736,0.151287678665663,0.604330150093384  
"3857","MGAT4B",180.986369097001,-0.339731393340666,0.236753117095591,  
-1.43496059316295,0.151298327316827,0.604330150093384  
"3858","CCDC180",25.8673296267968,0.658005111642565,0.458680154105548,  
1.43456198344947,0.151411954350859,0.604330150093384  
"3859","CNTN1",63.601691600579,1.46154889801287,1.01867552011057,1.434  
75411861692,0.151357176501211,0.604330150093384  
"3860","HOTAIR",10.5971817396664,0.844902240359687,0.589009654130397,1  
.43444548732751,0.151445174817434,0.604330150093384  
"3861","C12orf66",17.9493787569143,-0.500475958501038,0.34880694714478  
6,-1.4348222070909,0.151337764178876,0.604330150093384  
"3862","TCF20",61.1321873512598,0.387251441746018,0.26983910356455,1.4  
3511980521156,0.151252960750256,0.604330150093384  
"3863","SYTL4",67.5403240149837,0.445562621085003,0.310600731755142,1.  
43451890331107,0.151424238596148,0.604330150093384  
"3864","CABIN1",133.611921902731,-0.378745469394099,0.264094377580889,  
-1.43412924146064,0.151535384656413,0.604533632111443  
"3865","AC099791.2",8.75780341695659,-0.77876641935902,0.5434002854469

3,-1.43313583046521,0.151819023581226,0.605011277942075  
"3866","TRNT1",67.135278579394,-0.346477403595233,0.241705144019475,-1  
.4334713685999,0.151723175479632,0.605011277942075  
"3867","COQ2",46.5537818718366,-0.398891275136774,0.278463277838084,-1  
.43247353199912,0.152008347678862,0.605011277942075  
"3868","PCDHGB4",2.56105339280397,1.53458079398377,1.07094857101708,1.  
43291735524367,0.1518814568725,0.605011277942075  
"3869","TRIM4",108.259382485689,0.302768195219049,0.211336839700464,1.  
43263330542926,0.151962658533524,0.605011277942075  
"3870","DNAJC24",71.1028824797216,-0.298060462784394,0.20802034131192,  
-1.43284286961852,0.151902746970778,0.605011277942075  
"3871","ACER3",77.8130857422229,0.415960386039416,0.290374251948228,1.  
43249748642858,0.15200149695354,0.605011277942075  
"3872","NCAM1",3.89058920708764,-1.1718628345617,0.81801649684787,-1.4  
3256626128853,0.151981829343283,0.605011277942075  
"3873","EIF6",368.858494836249,-0.398728250483638,0.278200867491348,-1  
.43323870295278,0.151789632654452,0.605011277942075  
"3874","ETS2",52.2583741123195,-0.653022762324988,0.455924944745232,-1  
.43230321098112,0.152057064551108,0.605048954583205  
"3875","RC3H1",150.626631492345,0.372891258107721,0.260460170514589,1.  
43166326494758,0.152240214373336,0.605308977189831  
"3876","PELO",68.8634362262109,-0.375314409351974,0.262136056952302,-1  
.43175423371942,0.152214169265351,0.605308977189831  
"3877","GPD1",13.5174582567485,-1.25113397930158,0.873825190901418,-1.  
43178978167354,0.1522039925153,0.605308977189831  
"3878","ERI3",220.443082179407,-0.345793735576075,0.242262270068206,-1  
.42735282501366,0.153478221339997,0.605640416455023  
"3879","ENAH",467.311431831477,-0.337185116573639,0.235865421088932,-1  
.42956570325968,0.152841704900306,0.605640416455023  
"3880","PAPOLG",57.1316933463676,0.396650010184554,0.277271698301824,1.  
.43054632915611,0.152560278875955,0.605640416455023  
"3881","ZIC4",18.0462111589128,-0.67694404033135,0.473177027571478,-1.  
43063589499617,0.152534594389217,0.605640416455023  
"3882","LEKR1",2.85139091444201,1.34574232539917,0.942018954649049,1.4  
2857244937341,0.153127157441598,0.605640416455023  
"3883","CNOT6L",127.417861605096,0.325008202247336,0.227306025250392,1.  
.42982660441719,0.152766791353986,0.605640416455023  
"3884","NEK1",128.745275904304,0.268383394620001,0.188029723230228,1.4  
2734558137591,0.15348030821828,0.605640416455023  
"3885","AC008914.1",4.86693555137519,1.29736377602935,0.90724079986353  
5,1.43001039660529,0.152714035175321,0.605640416455023  
"3886","TRIM23",144.175090750782,0.333066034684287,0.233559553729227,1.  
.42604329117027,0.153855846308003,0.605640416455023  
"3887","HAVCR2",4.11203456988608,-1.11840079903059,0.78369882651622,-1  
.42707984392707,0.15355688158886,0.605640416455023  
"3888","ZNF12",137.558224183738,0.258124200149525,0.180860068916493,1.  
4272039245363,0.153521123621839,0.605640416455023  
"3889","AC093726.2",3.34707881431443,1.49565444594742,1.04741579411631  
,1.42794719570682,0.153307057782856,0.605640416455023  
"3890","E2F5",8.40136665838655,-0.689133586759042,0.482979412242085,-1

.4268384309798,0.153626470929313,0.605640416455023  
"3891","PPRC1",60.9944750503951,-0.383840417024424,0.268596778836788,-  
1.4290581543335,0.152987519430964,0.605640416455023  
"3892","MTMR2",75.0137955981218,-0.324441572928817,0.227184009664574,-  
1.42810039055054,0.153262965125396,0.605640416455023  
"3893","RPUSD4",74.004836532873,-0.325800824730066,0.228046404028373,-  
1.42866021553021,0.153101917889203,0.605640416455023  
"3894","AP001783.1",3.22952372029134,-1.31774606433348,0.9227149951856  
17,-1.42811818514817,0.153257844095936,0.605640416455023  
"3895","CACNB3",25.5274800800168,-0.504262267777739,0.352471008322649,  
-1.43064892110543,0.152530859210955,0.605640416455023  
"3896","ATP2B1",583.290492551393,0.367981924737862,0.257936445043597,1  
.42663796376531,0.15368427553304,0.605640416455023  
"3897","MMAB",87.4639262105945,-0.384366699580059,0.268858329412224,-1  
.42962541060327,0.152824558436843,0.605640416455023  
"3898","KBTBD6",49.5602122317879,0.401681820810081,0.281096991946923,1  
.42897943527594,0.153010144229165,0.605640416455023  
"3899","DLEU2",76.4963436670249,0.48455763470322,0.339756241711211,1.4  
2619200242711,0.15381292753071,0.605640416455023  
"3900","RABGGTA",44.1354551686324,-0.451774910712491,0.316745345829952  
, -1.42630323273962,0.153780831882416,0.605640416455023  
"3901","BAHD1",29.5705202179136,0.545082874891207,0.382095856801402,1.  
42656054806299,0.153706602730704,0.605640416455023  
"3902","CNOT1",176.795722370254,0.287129524837823,0.201066258005034,1.  
42803435885615,0.153281969235539,0.605640416455023  
"3903","NDEL1",144.307957837632,-0.267595838574578,0.187642319046929,-  
1.42609534956585,0.153840820971527,0.605640416455023  
"3904","AC015726.1",5.85809420025784,0.895507201815554,0.6260473877574  
95,1.43041440524697,0.152598116233828,0.605640416455023  
"3905","C17orf58",1539.0552793875,0.503789364581663,0.352296713430508,  
1.43001437531445,0.152712893269806,0.605640416455023  
"3906","ENGASE",33.9038778100258,0.547521526007953,0.383736176609459,1  
.42681758818164,0.153632480167838,0.605640416455023  
"3907","MRPL4",214.696569304011,-0.354901185087777,0.248282071418685,-  
1.42942735679572,0.152881440187169,0.605640416455023  
"3908","PLA2G4C",57.5551916549562,0.621231868835588,0.434186080134528,  
1.43079637339619,0.152488582782974,0.605640416455023  
"3909","RPL18",10452.5109271342,-0.374461660752281,0.262322967651818,-  
1.42748331991007,0.153440629703601,0.605640416455023  
"3910","OSCAR",8.78381276225186,-0.827921257608249,0.580087534264271,-  
1.42723504420468,0.15351215644438,0.605640416455023  
"3911","PPP1R12C",173.871087780373,-0.220004490906141,0.15406636807569  
6,-1.42798518361936,0.153296123173316,0.605640416455023  
"3912","FAM227A",7.1896622402582,-0.904626958663396,0.634245239143912,  
-1.42630468915216,0.153780411666494,0.605640416455023  
"3913","UBQLN2",162.487607800538,0.31314404256276,0.218953844136967,1.  
43018289446826,0.152664533560648,0.605640416455023  
"3914","EFNB1",61.509109108993,0.541440702690553,0.379324574918967,1.4  
273810306285,0.153470095561488,0.605640416455023  
"3915","MORF4L2",849.534474351122,-0.252609667962065,0.176677261544371

, -1.42978029970554, 0.152780084963223, 0.605640416455023  
"3916", "RPL39", 13839.9920945031, -0.317132351203894, 0.222001057931144, -  
1.42851729698629, 0.153143019634123, 0.605640416455023  
"3917", "GBP4", 73.4295438210391, 0.382925873935203, 0.268963599757715, 1.4  
2370891183843, 0.154530752868881, 0.606006592088343  
"3918", "PACC1", 20.3196864977395, -0.518927998325428, 0.364284583695434, -  
1.42451265178789, 0.154298125316612, 0.606006592088343  
"3919", "LTBP1", 245.518654693139, 0.460144136838067, 0.323307502651065, 1.  
42323989720302, 0.154666623465879, 0.606006592088343  
"3920", "LIMD1-  
AS1", 8.07891801377484, 1.02960056456143, 0.722959781900662, 1.42414639145  
571, 0.154404099523228, 0.606006592088343  
"3921", "RPL35A", 12361.3492499274, -0.360006346913625, 0.252970749612334,  
-1.42311452001988, 0.154702959816092, 0.606006592088343  
"3922", "LETM2", 6.09284990022965, 0.880309319193008, 0.618114211811177, 1.  
42418553460137, 0.154392771159664, 0.606006592088343  
"3923", "RPL8", 12370.1541751858, -0.336357102909334, 0.236040331685757, -1  
.42499843356062, 0.15415765390738, 0.606006592088343  
"3924", "TUBB4B", 1255.54190816331, -0.320298139775733, 0.224963010984193,  
-1.42378135131841, 0.154509775692616, 0.606006592088343  
"3925", "AL450306.1", 9.62917817127085, -0.915793803105795, 0.643015462898  
535, -1.42421738814437, 0.154383552935962, 0.606006592088343  
"3926", "RBP5", 7.90256295376556, -1.18626595791793, 0.833190331280881, -1.  
42376347081975, 0.154514953363747, 0.606006592088343  
"3927", "HOMER2", 5.72798073754185, 0.929521244926092, 0.653017582081635, 1  
.4234245301069, 0.154613125645956, 0.606006592088343  
"3928", "PAGR1", 170.157905037056, -0.290335571034883, 0.203951887247951, -  
1.42354932309066, 0.154576974546298, 0.606006592088343  
"3929", "CD2BP2-  
DT", 3.05898106932051, -1.11201079297115, 0.781602224425726, -1.4227323800  
0083, 0.154813750220168, 0.606006592088343  
"3930", "RIPOR1", 104.676758645638, 0.265900915061117, 0.18682662155243, 1.  
4232496035716, 0.154663810672534, 0.606006592088343  
"3931", "SHMT1", 46.7619340570414, -0.397442076322536, 0.278955966654797, -  
1.42474843283909, 0.154229933389711, 0.606006592088343  
"3932", "AC006141.1", 16.0394677757143, 0.611926566507539, 0.4300914326473  
66, 1.42278250636362, 0.154799214103613, 0.606006592088343  
"3933", "MIB1", 193.190711583571, 0.344186301669694, 0.241576498149142, 1.4  
2475076965974, 0.154229257655701, 0.606006592088343  
"3934", "CA11", 34.5931164078312, -0.52970125028722, 0.37221356866835, -1.4  
2311107083577, 0.154703959537475, 0.606006592088343  
"3935", "AC010642.2", 194.716567453878, -0.306203824831143, 0.214983214755  
916, -1.42431503398437, 0.154355297423129, 0.606006592088343  
"3936", "TP53TG5", 3.16829198700015, -1.24674284734629, 0.874719570188321,  
-1.42530576637022, 0.154068834015893, 0.606006592088343  
"3937", "T0B2", 294.923409873879, 0.314500984198939, 0.220628649119029, 1.4  
2547663440239, 0.154019469585693, 0.606006592088343  
"3938", "PARVG", 7.87035304222926, -0.90310114096575, 0.634725448686935, -1  
.42282169847453, 0.154787849526917, 0.606006592088343  
"3939", "ARID3A", 40.3956901150894, 0.523860481904799, 0.368273210153577, 1



.42247784378978,0.15488757903549,0.606141668147264  
"3940","SPAG16",173.785498996532,-0.309452642543753,0.217601232346903,  
-1.42210886954178,0.154994648337798,0.606406726935826  
"3941","IL6R-  
AS1",4.09721988279236,-1.30300101064735,0.91640071422615,-1.4218681745  
0013,0.155064523742014,0.606526169368977  
"3942","ADAMTSL4",668.480701197085,0.304970495873761,0.214557452134908  
,1.42139316457768,0.155202492527832,0.606841584047559  
"3943","CDR1",10.4454383372849,0.698032343281031,0.491115714969595,1.4  
2131950170694,0.155223896587708,0.606841584047559  
"3944","GLRX3",235.408614610064,-0.336954296275113,0.237116967442275,-  
1.4210467513555,0.155303168575611,0.606843686588856  
"3945","ASPA",165.799791298454,0.376414225920479,0.264873229543195,1.4  
2111087092361,0.155284530142487,0.606843686588856  
"3946","UBA6",111.77105577222,0.283517080808056,0.199576351525665,1.42  
059456764644,0.155434658669356,0.606934585905234  
"3947","MRPS36",352.081782181792,-0.369012470842732,0.259767798640043,  
-1.4205473995415,0.155448379506121,0.606934585905234  
"3948","TGFB1",166.426056517358,0.336870071236677,0.237184019995922,1  
.42028991347085,0.155523296420738,0.606934585905234  
"3949","DENND5A",170.771702427031,0.258186941058573,0.181775159238423,  
1.42036426836477,0.155501659662934,0.606934585905234  
"3950","PHLDB3",12.5901167049718,-0.815460076857745,0.57397248745565,-  
1.42073025219829,0.155395194209099,0.606934585905234  
"3951","AC007405.3",35.5295417477929,-0.560224649748884,0.394561768696  
677,-1.41986551712658,0.155646836556484,0.607262967734296  
"3952","NDUFAB1",550.538272759128,-0.361153416456945,0.254413899405198  
, -1.41955065073605,0.155738541062942,0.607331842905119  
"3953","SYNGR1",64.7243214373648,0.393128716778047,0.276942022943145,1  
.41953435813082,0.155743287382675,0.607331842905119  
"3954","ASCC1",68.7167437543468,0.357784241179465,0.252094237971414,1.  
41924799257028,0.155826728581226,0.607503546049469  
"3955","INKA2",5.48812752086002,-0.978634784092924,0.690212219728842,-  
1.4178751927594,0.156227206175969,0.607528350959274  
"3956","CALM2",2350.84082289877,-0.27272771903515,0.192226932229744,-1  
.41877995903922,0.155963177219272,0.607528350959274  
"3957","TET3",10.2725586175214,0.740523540369566,0.521997722574178,1.4  
1863366130747,0.156005846871439,0.607528350959274  
"3958","LINC01088",57.0599986660673,-1.12960271508415,0.79664776083482  
9,-1.41794500733976,0.156206820815944,0.607528350959274  
"3959","CLPTM1L",233.863048538877,-0.277880934016825,0.195979099805214  
, -1.41791106446052,0.156216731642781,0.607528350959274  
"3960","ANKHD1",340.182489395825,0.312807013061982,0.220533424477474,1  
.41841089985855,0.156070835179794,0.607528350959274  
"3961","ASS1",107.021493908447,-0.53050766611329,0.374153385481692,-1.  
41788818890494,0.156223411241208,0.607528350959274  
"3962","SYNGR2",6.61780110148427,-0.98031535850285,0.691298079137441,-  
1.41807910087936,0.156167672117818,0.607528350959274  
"3963","AC245060.6",7.38295898352419,1.00121391308112,0.70571987410817  
7,1.41871293386254,0.155982724891818,0.607528350959274

"3964", "TMLHE", 51.571162294172, 0.393935024038872, 0.27781342604455, 1.41798411130678, 0.156195403617869, 0.607528350959274  
"3965", "ARL2BP", 409.875669034244, -0.243806980272054, 0.171989066231255, -1.41757255629397, 0.156315597202983, 0.607565539809377  
"3966", "ALDH3A1", 5.11860753546916, 0.977216380087466, 0.689349294539573, 1.41759248588216, 0.156309775201987, 0.607565539809377  
"3967", "MINK1", 82.9244368446214, 0.306435659465486, 0.216198401339021, 1.41738170850284, 0.156371357614341, 0.607629059144205  
"3968", "MDH2", 446.007350256495, -0.352908929463036, 0.249017503731721, -1.41720531358006, 0.156422908714983, 0.607676194012467  
"3969", "ISY1", 164.95899374832, -0.272492723729772, 0.192300038492649, -1.41701856050428, 0.156477501013591, 0.607735116685439  
"3970", "ELOVL2", 13.1672201953894, 0.755205869521912, 0.533057871962163, 1.41674273891131, 0.156558156555456, 0.607895209899837  
"3971", "ZFAND3", 206.683653430109, 0.236032252912783, 0.166639509824153, 1.4164243111484, 0.156651310165844, 0.608103738656883  
"3972", "AC021097.2", 9.65182634819693, -0.790600604557319, 0.558356874108256, -1.41594138304463, 0.156792667294854, 0.608499236241231  
"3973", "LOX", 920.755849787971, 0.577517899612551, 0.408070045617831, 1.41524207869306, 0.156997530968433, 0.609140936289554  
"3974", "GLRX5", 462.545673378532, -0.373664141478641, 0.264157680985984, -1.41454959811851, 0.157200595483566, 0.609621931919287  
"3975", "KXD1", 273.322376161247, -0.264969791954654, 0.187310021610571, -1.41460552765053, 0.157184187199251, 0.609621931919287  
"3976", "PITHD1", 336.06526556894, -0.275414457714836, 0.19477558673031, -1.41400912885545, 0.157359222139992, 0.609768153718839  
"3977", "SUPT7L", 89.3340105357242, 0.319645526694132, 0.226276395649069, 1.41263310199562, 0.157763630830554, 0.609768153718839  
"3978", "AC093495.1", 9.00243773236006, 0.853239119156309, 0.603817609460736, 1.41307425584744, 0.157633891851139, 0.609768153718839  
"3979", "TMEM243", 361.605977102664, -0.349761831703398, 0.247659759888735, -1.41226750708526, 0.157871209957307, 0.609768153718839  
"3980", "LCNL1", 2.37134507703582, 1.71290821430579, 1.212647415381, 1.41253606990752, 0.157792177856778, 0.609768153718839  
"3981", "CD82", 17.0409111317263, -0.538101075434748, 0.380925270328213, -1.41261585237206, 0.157768705416886, 0.609768153718839  
"3982", "AP001160.3", 14.2382351768419, -0.539336530450881, 0.381838394846716, -1.41247328118323, 0.157810652505004, 0.609768153718839  
"3983", "TSKU", 210.736155907673, 0.487056963102522, 0.344803634005177, 1.41256331160132, 0.157784162903211, 0.609768153718839  
"3984", "MDP1", 179.437768277289, -0.377567344354658, 0.267248479779452, -1.41279510613586, 0.157715977621676, 0.609768153718839  
"3985", "KLF13", 418.321007962209, -0.302666470524528, 0.214257544052857, -1.41262923488874, 0.157764768465944, 0.609768153718839  
"3986", "DNAJA2", 346.0212229013, -0.224840470139175, 0.159140161041749, -1.41284556121688, 0.157701138583012, 0.609768153718839  
"3987", "NUDT21", 224.471664270954, 0.195340231661733, 0.138308559933647, 1.41235099082404, 0.157846639327779, 0.609768153718839  
"3988", "EMC8", 114.628287635416, -0.329871959840964, 0.233427578060786, -1.4131661844817, 0.15760686673041, 0.609768153718839

"3989", "SGTA", 112.493973518423, -0.28924084256681, 0.204630922467694, -1.41347573025027, 0.157515892476053, 0.609768153718839  
"3990", "COL6A2", 13972.6266453564, -0.295155322238623, 0.208948434303206, -1.41257494090777, 0.157780741464256, 0.609768153718839  
"3991", "CERK", 98.0829268897309, 0.339546362342807, 0.240120179427462, 1.41406841837456, 0.157341814862462, 0.609768153718839  
"3992", "RBM8A", 567.073971335645, -0.317236281618907, 0.224806696625838, -1.41115138641491, 0.158199980866155, 0.610030608829882  
"3993", "HIST2H2BE", 9.79733513320635, 0.788349758985434, 0.558625151979973, 1.41123212263399, 0.158176181359548, 0.610030608829882  
"3994", "SEPSECS-AS1", 25.3453516163022, 0.49187042989834, 0.348556306699423, 1.41116491207977, 0.158195993567521, 0.610030608829882  
"3995", "PTPN13", 189.260040799223, 0.300272225048924, 0.212759497393531, 1.41132230865128, 0.158149599437723, 0.610030608829882  
"3996", "EMB", 16.3498920705941, -0.700704684526949, 0.49656753495992, -1.41109644750236, 0.158216177366323, 0.610030608829882  
"3997", "PRKAG2", 193.570136829932, 0.408011958527071, 0.289139552170356, 1.41112468171313, 0.158207853502699, 0.610030608829882  
"3998", "LINC00667", 218.115975899777, -0.26053046195246, 0.184529590022376, -1.41186279079072, 0.157990365649537, 0.610030608829882  
"3999", "UTP11", 154.706905608191, -0.307543865040713, 0.218082949749911, -1.41021508280859, 0.158476183528167, 0.610075042372593  
"4000", "ETAA1", 72.04974573808, 0.338029912292064, 0.23982609092631, 1.40947930638593, 0.158693488205673, 0.610075042372593  
"4001", "PAIP2B", 31.467307402851, 0.451260305494181, 0.320035402118247, 1.41003246049463, 0.158530098288392, 0.610075042372593  
"4002", "AP2M1", 1041.65259721904, -0.253172966122402, 0.179594046948068, -1.4096957578756, 0.158629537881316, 0.610075042372593  
"4003", "ALDH7A1", 180.022695338857, 0.296911605473331, 0.21058409779362, 1.40994314662978, 0.158556471072723, 0.610075042372593  
"4004", "RNF144B", 7.54624253085549, -1.02924417518168, 0.730174561159502, -1.40958646045852, 0.158661827229004, 0.610075042372593  
"4005", "MAP3K5", 34.042738887362, 0.496349690944904, 0.351842729106001, 1.41071464573414, 0.158328770751211, 0.610075042372593  
"4006", "FAM3C", 709.456151156292, -0.279117441141984, 0.197983240295807, -1.4098033789373, 0.158597748634113, 0.610075042372593  
"4007", "FAU", 8759.29751267489, -0.352172694847775, 0.249830079773845, -1.40964889082441, 0.158643383038527, 0.610075042372593  
"4008", "RAB27A", 46.5270900526811, -0.411351967209281, 0.29179320967757, -1.40973797047513, 0.158617068494667, 0.610075042372593  
"4009", "TK2", 304.346238893938, 0.308968431084367, 0.219084856310345, 1.41026831469673, 0.158460470731715, 0.610075042372593  
"4010", "LRRRC75A", 150.874097541146, -0.579296494995907, 0.411009368258348, -1.40944839639708, 0.158702622115738, 0.610075042372593  
"4011", "LINC02427", 4.86754916734479, 1.28335989975582, 0.910717794610967, 1.40917406835564, 0.158783703565122, 0.6100824502633  
"4012", "AC093627.4", 2.38678473161985, -1.36796883643167, 0.970700957975174, -1.40925876830819, 0.15875866597671, 0.6100824502633  
"4013", "COLEC11", 6.46250703303766, 1.4198697781104, 1.00794561474936, 1.4

086769735721,0.158930706685697,0.610495101809124  
"4014","TRIM5",69.8541719801239,0.344021157253264,0.244254410800987,1.  
4084542265792,0.158996611842533,0.610596106515357  
"4015","PATL2",9.79585783228762,0.692420467940188,0.491681323358987,1.  
40827083528377,0.159050888173385,0.610652413746632  
"4016","DSTYK",168.255039352756,0.356532809866,0.253301090260624,1.407  
54550049177,0.159265695032484,0.610764860324422  
"4017","NFIB",2579.82866857258,0.270215172307067,0.191936308198457,1.4  
0783770847396,0.159179131671675,0.610764860324422  
"4018","HAPLN3",17.1399435459867,-0.85773577388075,0.609460334234783,-  
1.40736931626189,0.159317904856601,0.610764860324422  
"4019","WDR59",67.4477053177006,0.378036592509681,0.268524859573416,1.  
40782716769776,0.159182253640213,0.610764860324422  
"4020","RPS16",11228.5105701009,-0.303629372013003,0.215730008528882,-  
1.40745079501702,0.159293758115468,0.610764860324422  
"4021","ZNF865",44.570882459695,-0.356489776817375,0.253288243632499,-  
1.40744699282061,0.159294884858676,0.610764860324422  
"4022","DUSP2",63.0652476984206,-0.757865796799056,0.538555160487844,-  
1.40722037852641,0.159362050647689,0.610782200580341  
"4023","TTC37",335.959252363584,0.237176078226649,0.168579491346556,1.  
40690944273332,0.159454243191515,0.610983633804922  
"4024","KHNYN",92.6327941071328,0.354097522572485,0.251735933372245,1.  
40662287592005,0.159539246047121,0.611056331452879  
"4025","TAB1",53.2005887124701,0.363308163201797,0.258292186816234,1.4  
065782154699,0.159552496535701,0.611056331452879  
"4026","AC110772.2",8.49376109251659,-0.850236274742319,0.604795507684  
43,-1.40582438847405,0.15977627812152,0.611477055313719  
"4027","CAPZA2",481.790161618614,-0.284580223535107,0.202429812803491,  
-1.40582169984697,0.159777076693732,0.611477055313719  
"4028","TLCD3A",51.2729744392932,0.389236240606393,0.276877379453221,1.  
40580729771084,0.159781354447205,0.611477055313719  
"4029","DARS2",18.5007553902856,0.51194213464711,0.364297480739311,1.4  
0528595917866,0.159936261859848,0.611766123218251  
"4030","LINC00603",4.9439028282358,-1.59153375666961,1.13245380612104,  
-1.40538514513104,0.159906781595452,0.611766123218251  
"4031","HCG11",190.197054591991,0.25623821991935,0.182422651757841,1.4  
0464036373891,0.160128247576165,0.611893142386363  
"4032","PWP1",249.528288598253,-0.254911579248372,0.181443306738447,-1.  
40491034819946,0.160047939021125,0.611893142386363  
"4033","GAA",330.899865200717,0.353689574925986,0.251779183474859,1.40  
476098954902,0.16009236291538,0.611893142386363  
"4034","HIF3A",40.1100459934059,-0.78275901561447,0.557200868438794,-1.  
40480580693936,0.160079031854848,0.611893142386363  
"4035","MGME1",48.9802317111344,0.373313802642191,0.26584433755423,1.4  
0425711556124,0.160242299439327,0.612082739031488  
"4036","PCSK1N",2.49791089290577,2.01764427215457,1.43685693061512,1.4  
0420679969217,0.160257277634193,0.612082739031488  
"4037","NBPF12",79.0933925172087,0.617277352146292,0.439825299760981,1.  
40346031135941,0.160479619099391,0.612677971218191  
"4038","ZNF891",39.266680578465,0.453508698763277,0.323146145308094,1.

40341670587125,0.160492614192608,0.612677971218191  
"4039","KTN1",854.345827491869,-0.276792090456141,0.197246618912435,-1  
.40327926522796,0.160533578781281,0.612682623647797  
"4040","AURKAIP1",632.870970844603,-0.363489375519598,0.25961132096352  
2,-1.40012913986394,0.161474650394187,0.613420911344429  
"4041","CZIB",571.902006446054,-0.376524479938048,0.268992616848695,-1  
.39975767494703,0.161585896209401,0.613420911344429  
"4042","ACOT11",5.09704456729245,-1.13824382669531,0.812168376513235,-  
1.40148749891244,0.161068343238064,0.613420911344429  
"4043","AL078459.1",10.4854635146199,0.819789157961872,0.5849193517349  
23,1.40154220497288,0.161051995963261,0.613420911344429  
"4044","LRIF1",59.5936762873566,-0.320414339038688,0.228878940191732,-  
1.39992931971057,0.161534485075963,0.613420911344429  
"4045","RPL29",12446.1448381173,-0.384119133743124,0.274078498582625,-  
1.40149313327958,0.161066659517569,0.613420911344429  
"4046","SIAH2",76.3371820673945,-0.326866992174949,0.233480290111019,-  
1.39997681183077,0.161520262391875,0.613420911344429  
"4047","LMBRD2",54.1813928674088,0.373825646421688,0.266855589025715,1  
.40085372686597,0.161257818498062,0.613420911344429  
"4048","CEP41",38.346080155763,0.41625857844903,0.297390794895733,1.39  
97022960814,0.161602485953275,0.613420911344429  
"4049","TMEM86A",11.5876046856191,0.713455716524054,0.50970277741414,1  
.3997485360853,0.161588633832632,0.613420911344429  
"4050","ESAM",2.57090961741947,-1.4611170214438,1.04233141054381,-1.40  
177779031095,0.160981612629933,0.613420911344429  
"4051","AC010168.2",5.60564557445128,1.15709007447459,0.82568220804462  
3,1.40137460054372,0.161102083511338,0.613420911344429  
"4052","MAPKBP1",35.2040894253239,0.403195629238109,0.287688065496626,  
1.40150279971498,0.161063770923248,0.613420911344429  
"4053","AC027279.1",34.8393787669305,0.491599143980721,0.3507803878554  
83,1.40144421125178,0.161081279352871,0.613420911344429  
"4054","TNFSF13",56.8427435796258,-0.535209055949381,0.381784938652603  
, -1.40186005723076,0.16095704008941,0.613420911344429  
"4055","AC020910.5",37.1464924763367,-0.599332311357807,0.428136371297  
391,-1.39986310796636,0.16155431539032,0.613420911344429  
"4056","TMEM147",450.939762314278,-0.308032726098085,0.219988677282503  
, -1.40022082001302,0.16144720304651,0.613420911344429  
"4057","LIG1",19.2951032478829,-0.499991959626216,0.357116651411879,-1  
.40008021930501,0.161489297749971,0.613420911344429  
"4058","ZHX3",205.354632659599,0.372868765411929,0.266370728524969,1.3  
9981133616555,0.161569822244609,0.613420911344429  
"4059","ATP6V1E1",310.017448068932,0.216574629550319,0.154643539407079  
, 1.40047641421485,0.161370701453602,0.613420911344429  
"4060","RRP7A",146.486331154947,-0.456760018991503,0.326187370929639,-  
1.4002995201492,0.161423644485919,0.613420911344429  
"4061","PHF6",104.859558686451,0.31848741520433,0.227475707577974,1.40  
009418410165,0.161485116433265,0.613420911344429  
"4062","ADIPOR2",97.4152090226881,0.28211103234716,0.201590364265889,1  
.39942716694072,0.161684924944664,0.613582746928113  
"4063","ELOVL6",64.5606695406784,0.409827784574623,0.292951961977108,1

.39895900272772,0.161825277446539,0.613878014356383  
"4064","RBM7",325.417417426965,-0.302985267469255,0.216587917485285,-1  
.39890198394765,0.161842377576668,0.613878014356383  
"4065","TRAF2",31.1914450192372,0.431840609272283,0.308827432425885,1.  
3983233480268,0.162015989666023,0.614385358106209  
"4066","RPL36AL",2296.31091902122,-0.351297905053702,0.251312891327049  
, -1.3978507158892,0.162157900984663,0.614470020569955  
"4067","AC015712.2",25.5663837269486,0.501268606247137,0.3585708575436  
24,1.39796248273231,0.162124333691972,0.614470020569955  
"4068","ZNF850",9.18181899677985,0.745464447469488,0.533195703891277,1  
.39810662769611,0.162081049918175,0.614470020569955  
"4069","LINC00640",15.8652944074175,0.814837570737643,0.58314900194480  
2,1.39730595100079,0.162321587051093,0.614637009185115  
"4070","MARK3",257.250296498747,0.278889652333276,0.199567278011713,1.  
39747184564449,0.162271727319632,0.614637009185115  
"4071","SMCR8",49.1165910862501,0.449681444585869,0.321799723955381,1.  
39739537081834,0.162294710437016,0.614637009185115  
"4072","FOXP4",31.8326773433388,-0.484691945724904,0.346962565915933,-  
1.39695746267435,0.16242636306619,0.614882707923702  
"4073","AC107223.1",5.94518260399672,0.987810715278159,0.7071919814825  
99,1.39680700735217,0.162471614521742,0.614903004628689  
"4074","CCDC40",9.26827089124294,-0.877794234413179,0.628572398315303,  
-1.39648867300861,0.162567389195276,0.6151144586267  
"4075","LINC02591",37.3497377258917,0.448412237455109,0.32119614341012  
2,1.39606980549125,0.16269347535487,0.615188674965128  
"4076","PLA2R1",178.360674978218,0.426126470524173,0.305231310101495,1  
.39607719267882,0.162691251048485,0.615188674965128  
"4077","GPAA1",370.818023204178,-0.313662628184798,0.224682545563907,-  
1.39602579006558,0.16270672901932,0.615188674965128  
"4078","MDFI",3.83294564761746,1.34696036583478,0.965063645199527,1.39  
572179776422,0.162798287619219,0.615297837737502  
"4079","DCAF10",181.051747113647,0.305059870758857,0.218576732046232,1  
.3956648903248,0.162815431730864,0.615297837737502  
"4080","AC073195.1",3.52876529020608,-1.04007728634243,0.7453036530904  
62,-1.39550810200603,0.162862673310141,0.615323226666127  
"4081","PITPNM1",14.1686150241528,-0.657547742975086,0.471277541820074  
, -1.39524523157975,0.162941901475909,0.615323226666127  
"4082","FOPNL",114.138564650043,0.242082488473302,0.173490690326338,1.  
39536299047483,0.162906405790941,0.615323226666127  
"4083","CHAMP1",69.7670432439651,0.292055204553628,0.209344489454012,1  
.39509382508865,0.162987548017996,0.615344857383642  
"4084","TOR1AIP1",311.339340328094,0.239851251310991,0.171999719084923  
, 1.39448629676289,0.163170804700328,0.615568064589326  
"4085","FAM110B",126.929479255376,0.362761860188293,0.260260890150499,  
1.39383931246267,0.163366133781053,0.615568064589326  
"4086","EXPH5",14.3955178205578,-0.679089008455045,0.487150197567218,-  
1.39400335224403,0.16331659235172,0.615568064589326  
"4087","AP000821.2",12.5984059320281,-0.67028188823522,0.4806943162053  
96,-1.39440360669631,0.163195759589626,0.615568064589326  
"4088","AC004494.1",4.29122142359151,1.27710280306611,0.91565434148292

1,1.39474334932744,0.163093247634943,0.615568064589326  
"4089","SF3B3",169.613952802551,0.256833968443641,0.184214740606167,1.  
39420964684214,0.163254305682974,0.615568064589326  
"4090","KIF3B",148.958619932339,-0.33205471609981,0.238164008811732,-1.  
.39422710323246,0.163249035885154,0.615568064589326  
"4091","FAM3A",170.005368326957,-0.367739445490687,0.263807809505112,-  
1.39396724524776,0.163327496003839,0.615568064589326  
"4092","CCDC12",256.45293591996,-0.297065346759146,0.213163604897932,-  
1.39360256597925,0.163437653235276,0.61568705391539  
"4093","SFRP1",1255.98308597973,1.10296939075287,0.791613045422513,1.3  
9331886599238,0.163523388099721,0.615709093199122  
"4094","PICALM",287.273545846941,0.236705032272281,0.169873440797587,1.  
.39341989637054,0.163492852574199,0.615709093199122  
"4095","POGZ",232.182581211285,0.264643062306726,0.190065899849129,1.3  
9237528939592,0.163808783256839,0.616156359033465  
"4096","SRRT",86.3621247801303,-0.362347290605869,0.260257332464075,-1.  
.39226544426327,0.163842031506855,0.616156359033465  
"4097","KLRD1",18.5367396438902,0.75570246523584,0.542780138170315,1.3  
9228098467876,0.163837327379063,0.616156359033465  
"4098","ZFP1",34.5058626121742,0.387457562200701,0.278217161292034,1.3  
9264436601019,0.163727359833261,0.616156359033465  
"4099","CENPX",279.135902277797,-0.396040860802368,0.284403280307611,-  
1.39253267534049,0.163761154075044,0.616156359033465  
"4100","BANP",57.1576511388966,0.327973890349488,0.235640777408807,1.3  
9183843287232,0.16397132888965,0.616492203618036  
"4101","SEMA6D",9.37398104263903,1.00592270013364,0.722840534102108,1.  
39162464288637,0.164036092538502,0.61658531248013  
"4102","ENTPD3-  
AS1",62.4241053182117,0.35013005424475,0.25169357181633,1.391096529474  
55,0.164196157152884,0.617036509632302  
"4103","ERCC5",167.019156193718,0.310954812348463,0.223553692885806,1.  
39096253939899,0.164236786587701,0.61703876803544  
"4104","RTN4",3853.06921238222,-0.218952497770709,0.157442303298534,-1.  
.39068403588801,0.164321260656377,0.617109927956819  
"4105","SELENOW",1525.07289869226,-0.338818641481448,0.243642915097805  
, -1.39063613380851,0.164335793335241,0.617109927956819  
"4106","DNAJC11",48.1458808841177,0.351889523425266,0.253091658142227,  
1.39036397330614,0.164418380594741,0.61726968749828  
"4107","MCU",84.5546588380087,0.349461244304515,0.251390013586152,1.39  
011585750503,0.164493698712661,0.61740208562349  
"4108","YRDC",49.6327386824291,-0.414034118398695,0.29797243481389,-1.  
3895047662959,0.16467931258055,0.617919149969862  
"4109","CLDN11",102.560245475352,1.10690228088913,0.797601867713651,1.  
38778797504838,0.165201617557183,0.617919149969862  
"4110","FRAS1",17.0344074670817,1.05988633625691,0.764216445206442,1.3  
8689286641901,0.165474433411487,0.617919149969862  
"4111","TRIM52-  
AS1",117.834107090129,-0.360683935538964,0.26018869822779,-1.386239825  
1564,0.165673684516733,0.617919149969862  
"4112","AL590004.3",5.311379896964,-1.12860705309737,0.814125205112568

, -1.38628192077817, 0.165660835172434, 0.617919149969862  
"4113", "HSPA1L", 4.77288777997936, 1.26098159195845, 0.908864042585589, 1.38742598768803, 0.16531190514404, 0.617919149969862  
"4114", "DINOL", 16.7471181377786, -0.749247149501109, 0.539755712580445, -1.3881226859446, 0.16509968964554, 0.617919149969862  
"4115", "GSTA4", 200.900719704985, 0.369219935837156, 0.265923153861846, 1.38844598702742, 0.165001281263286, 0.617919149969862  
"4116", "YWHAZ", 1223.37735413432, -0.217450639541544, 0.156566895433442, -1.38886728857688, 0.164873109165843, 0.617919149969862  
"4117", "TSSC4", 197.421578087829, -0.329247310439548, 0.237228472802579, -1.38789120272905, 0.165170177074304, 0.617919149969862  
"4118", "P4HA3", 15.4329827438069, -0.885984921944028, 0.639055628713133, -1.38639718067758, 0.165625656867827, 0.617919149969862  
"4119", "MORN3", 3.89050330982145, -1.07622066040672, 0.776132282373183, -1.38664591700265, 0.165549759572659, 0.617919149969862  
"4120", "AL139385.1", 2.36690593063533, -1.76677745660437, 1.27196250726081, -1.38901692975932, 0.164827602042613, 0.617919149969862  
"4121", "PLEKHH1", 2.36515013401008, 1.62584392524454, 1.1713007265882, 1.38806703380126, 0.165116633845146, 0.617919149969862  
"4122", "RDH11", 244.422778268226, -0.2365761550204, 0.17064029310429, -1.38640265271821, 0.165623986894111, 0.617919149969862  
"4123", "OTUB2", 3.3474579319068, 1.45488186962362, 1.04871316886284, 1.38730199335744, 0.165349695542838, 0.617919149969862  
"4124", "NEDD4", 86.7594995415588, 0.311586636073742, 0.224649504786291, 1.3869900864912, 0.165444785771924, 0.617919149969862  
"4125", "TSR3", 335.954861987537, -0.323992268199206, 0.233601660424682, -1.38694334453872, 0.165459039413366, 0.617919149969862  
"4126", "CARHSP1", 901.711607702911, 0.33073132196742, 0.238074168785092, 1.38919448361477, 0.164773618712878, 0.617919149969862  
"4127", "C16orf86", 51.2435792952801, 0.481408389502121, 0.347254846185524, 1.38632590672305, 0.165647409623544, 0.617919149969862  
"4128", "KRT25", 9.9229472289944, 1.21109826250806, 0.872515877255146, 1.38805297883869, 0.16512091331398, 0.617919149969862  
"4129", "CEBPA", 120.017336993203, -0.410238107768274, 0.295305823455896, -1.38919748675238, 0.164772705755863, 0.617919149969862  
"4130", "Z95331.1", 29.2660836099373, 0.792781947854574, 0.571893120231015, 1.38624144933643, 0.165673188735155, 0.617919149969862  
"4131", "SH3KBP1", 323.687407094298, 0.238676047546297, 0.17198366061241, 1.38778327369243, 0.165203049575909, 0.617919149969862  
"4132", "FAM104B", 132.492815602152, -0.355469694987415, 0.256062329138461, -1.38821550277784, 0.165071432963939, 0.617919149969862  
"4133", "LINC00629", 4.25832010251725, 1.06964226151907, 0.771039047840443, 1.38727378920038, 0.165358292378432, 0.617919149969862  
"4134", "LM04", 656.271152456785, -0.302981561915635, 0.219156767011377, -1.38248782388684, 0.166821966565854, 0.618250705587772  
"4135", "COX20", 307.020459786012, -0.32950007189759, 0.238454325970574, -1.38181628937296, 0.167028116125582, 0.618250705587772  
"4136", "CRIM1-DT", 42.9227974133344, 0.601517823818044, 0.434446007398094, 1.38456289981935, 0.16618616238519, 0.618250705587772



"4137", "HAA0", 35.2463253924365, 0.483511759901225, 0.349190570162566, 1.3  
8466442457517, 0.166155101981354, 0.618250705587772  
"4138", "LBX2-  
AS1", 31.1600549500958, 0.418062436714796, 0.302094363230937, 1.3838802956  
916, 0.166395111140676, 0.618250705587772  
"4139", "PAX8-  
AS1", 124.560997241671, -0.712774285497131, 0.516108197567744, -1.38105592  
752879, 0.167261765183965, 0.618250705587772  
"4140", "PDCD6IP", 351.791869261115, 0.181817828233668, 0.13156215444686, 1  
.38199187295239, 0.166974196508265, 0.618250705587772  
"4141", "SELENOK", 707.109783158378, -0.267524531282195, 0.19330492256382,  
-1.38395095031204, 0.166373474224724, 0.618250705587772  
"4142", "ZBED3-  
AS1", 7.05741677438642, 0.896950447462487, 0.648430992616514, 1.3832627645  
4363, 0.166584310842703, 0.618250705587772  
"4143", "SRFBP1", 152.439060862816, -0.312132711798675, 0.225289219892165,  
-1.38547557645269, 0.165907095587409, 0.618250705587772  
"4144", "PCDHGA8", 13.6559520495174, 0.813575537065987, 0.589242549635153,  
1.38071416867254, 0.167366863082567, 0.618250705587772  
"4145", "DCTN4", 125.072284532773, 0.294076121000774, 0.212546507053123, 1.  
38358482140228, 0.166485618627949, 0.618250705587772  
"4146", "FBXL4", 98.5291156833784, 0.342442179608987, 0.247733630858236, 1.  
38229992602396, 0.166879628703717, 0.618250705587772  
"4147", "BX322234.1", 65.7540753593627, -0.622602095308684, 0.450079341741  
767, -1.38331631240676, 0.166567898402999, 0.618250705587772  
"4148", "ADCY1", 31.0242109237537, 0.510070120211507, 0.368360891317102, 1.  
38470215550764, 0.166143559722438, 0.618250705587772  
"4149", "PEBP4", 10.8362929046125, 0.689694987106093, 0.499469747991418, 1.  
38085437582487, 0.167323740490686, 0.618250705587772  
"4150", "AC090578.1", 6.98280911743483, 0.993355108749397, 0.7193119534299  
79, 1.38097956528133, 0.167285243847415, 0.618250705587772  
"4151", "SIT1", 4.25220255848096, 1.13842664807577, 0.821837319692992, 1.38  
52214067147, 0.165984776978509, 0.618250705587772  
"4152", "SEC16A", 104.979437341347, 0.294722296196375, 0.213321452990439, 1  
.38158770280636, 0.167098331930868, 0.618250705587772  
"4153", "CREM", 130.860750210514, -0.332025258563648, 0.240150369728566, -1  
.38257233973416, 0.166796035207253, 0.618250705587772  
"4154", "INPP5F", 34.7792956942609, -0.438836859630245, 0.31720450514072, -  
1.38345090475801, 0.166526651165799, 0.618250705587772  
"4155", "UEVLD", 72.1288842021221, 0.341542843790707, 0.247281647156964, 1.  
38118961806296, 0.167220666081893, 0.618250705587772  
"4156", "PTPRJ", 17.2588364424303, 0.610348481065155, 0.441924039796889, 1.  
38111626908931, 0.167243214060756, 0.618250705587772  
"4157", "EMSY", 72.8080400367369, 0.323131598900557, 0.233253959306965, 1.3  
8532096029852, 0.165954347356206, 0.618250705587772  
"4158", "KATNAL1", 149.596281341907, 0.219650121643054, 0.158749287985877,  
1.38362901925327, 0.166472077917181, 0.618250705587772  
"4159", "COL4A2", 637.720903440083, -0.385224820486066, 0.278713954553428,  
-1.38215117755154, 0.166925287290291, 0.618250705587772  
"4160", "F7", 3.35091106673128, 1.21740592763607, 0.880843155916732, 1.3820

9160105134,0.166943577027319,0.618250705587772  
"4161","ZNF219",57.736430792644,-0.367281555206075,0.265904578591292,-  
1.38125321930091,0.167201116473042,0.618250705587772  
"4162","HOMEZ",22.4751804149845,0.491544061378336,0.355922321120271,1.  
38104308780409,0.16726571276752,0.618250705587772  
"4163","ADSSL1",11.3883232788946,1.05364677392703,0.762816135624902,1.  
38125915895038,0.167199290844313,0.618250705587772  
"4164","TUBGCP4",96.8993102299089,0.290093442692333,0.209406139441207,  
1.38531488840985,0.165956203174033,0.618250705587772  
"4165","RPL4",4007.86229292524,-0.23540286612836,0.169977684693482,-1.  
38490453351484,0.166081660614462,0.618250705587772  
"4166","CDR2",102.505912416228,-0.33098464717612,0.23942193508204,-1.3  
8243242860227,0.166838964726166,0.618250705587772  
"4167","FBR5",93.1970722974177,-0.264590971479822,0.191389222143311,-1.  
38247581821352,0.166825650421634,0.618250705587772  
"4168","SLFN13",12.8696784864037,0.692010369944094,0.50026180049774,1.  
38329644449281,0.166573987784065,0.618250705587772  
"4169","ZNF260",60.6797799169346,0.323917651104324,0.234522465703757,1.  
38117962444369,0.167223738054765,0.618250705587772  
"4170","EIF3D",677.345633778582,-0.336775739113797,0.243908295369831,-  
1.38074737721878,0.167356648593864,0.618250705587772  
"4171","DMC1",4.86472675822018,-0.941446829405354,0.680441789046615,-1.  
38358173257471,0.166486564970091,0.618250705587772  
"4172","ZRSR2",70.4722241783245,-0.303495023732674,0.219715818996668,-  
1.38130711351865,0.167184551930939,0.618250705587772  
"4173","G6PD",142.403186601716,-0.292933598543879,0.211983708441808,-1.  
38186844968935,0.16701209695024,0.618250705587772  
"4174","LRIG3",243.035874279973,0.280868016404942,0.203458557913518,1.  
38046794042612,0.167442614090961,0.618382342168704  
"4175","AADAT",24.5941765143865,0.521944820695325,0.378145743577473,1.  
38027421849954,0.167502229867907,0.618454340937433  
"4176","HTRA2",184.739651697203,-0.330555229225327,0.239558311517878,-  
1.37985289314689,0.167631943123671,0.618488847116178  
"4177","PLIN1",4.35621981983016,-1.17065167912962,0.848381094811519,-1.  
37986535330528,0.167628105937719,0.618488847116178  
"4178","ZNF630",4.32491131193227,1.00783147900527,0.730273933777926,1.  
38007319224918,0.167564110325387,0.618488847116178  
"4179","MESD",566.722514337269,0.226461310716351,0.164144206905608,1.3  
7964851142495,0.167694893206736,0.618573050677634  
"4180","MRM3",56.4562098753793,-0.393495082727822,0.28524624042188,-1.  
37949261713614,0.167742920973557,0.618602183446741  
"4181","LGALS9",48.0713972575617,-0.412743418612901,0.299376577568684,  
-1.37867638799567,0.167994552737518,0.619381973319502  
"4182","NBN",267.415663087498,-0.239119778860722,0.173483089539804,-1.  
37834632467655,0.168096386976551,0.619609231287309  
"4183","HTR2A",11.8331447325361,-0.802377157212206,0.582261461974847,-  
1.37803583031375,0.168192225916523,0.619666147825812  
"4184","ZNF738",36.9148696820978,0.409594731890869,0.297215860609867,1.  
3781052298165,0.168170801115934,0.619666147825812  
"4185","H2AFY2",25.5081549562974,0.568001249088194,0.412225934869995,1

.37788819441292,0.168237810432984,0.619685985143238  
"4186","GKAP1",30.0525284871976,-0.467125186560275,0.339057136248827,-  
1.37771819737621,0.168290310730202,0.619731280436232  
"4187","EFHB",5.43099436527548,-1.52145498949539,1.10495081256728,-1.3  
7694363603425,0.168529674705209,0.619777667615749  
"4188","ZKSCAN7",13.7351439133167,0.608377834832477,0.441695055675766,  
1.37737071541744,0.168397662073086,0.619777667615749  
"4189","GOLT1B",154.277476843654,-0.299708546899108,0.217650500751742,  
-1.37701749301723,0.168506839544813,0.619777667615749  
"4190","SEL1L",322.012174927236,0.222220946053705,0.161374349864999,1.  
37705246366357,0.168496028102839,0.619777667615749  
"4191","ALKBH5",232.711349790705,-0.231212554002505,0.16787234709489,-  
1.37731173718452,0.168415887954927,0.619777667615749  
"4192","LRP5L",8.9253330840238,-0.694988748024593,0.504750049228016,-1.  
.37689684050063,0.16854414418717,0.619777667615749  
"4193","PCDH18",790.88147181688,0.213060229177341,0.154773498241683,1.  
3765937424548,0.168637886642837,0.619974486668096  
"4194","HIST1H1C",66.5854303524127,0.465587158094079,0.338322586741398  
,1.37616339062209,0.168771053481055,0.620002000305419  
"4195","MYH11",7.82666449327031,0.862531655346829,0.626817235371609,1.  
37604967871612,0.168806253342967,0.620002000305419  
"4196","ZNF625",16.4069464200963,0.576230103302975,0.418696196020892,1.  
.37624871871113,0.168744643532128,0.620002000305419  
"4197","USP25",121.911470350622,0.259736971541111,0.188714172328262,1.  
37635116820642,0.168712938423324,0.620002000305419  
"4198","SH3RF3",35.5985934523876,0.510016146242668,0.370728914435459,1.  
.37571181093148,0.168910873829547,0.620126240611335  
"4199","FBLN7",112.422239449305,0.366514975800469,0.266424468702264,1.  
37568061066515,0.168920537419851,0.620126240611335  
"4200","FLNB",223.086706747636,0.413348742038079,0.300516491240238,1.3  
7546109477114,0.168988539323777,0.620228174684766  
"4201","HACE1",31.0182512135514,0.438729191859192,0.319096608143986,1.  
37491023302016,0.169159276386041,0.620707032966156  
"4202","AC092802.1",15.0462639123536,0.623565934016314,0.4536608174536  
21,1.37452014815025,0.16928025962996,0.620855389530297  
"4203","STEAP1",164.336882354095,-0.417346517752048,0.303605330504167,  
-1.3746350140131,0.169244627707932,0.620855389530297  
"4204","AC123768.3",7.12644518697845,0.925523468245284,0.6734275979431  
13,1.37434739988703,0.169333857533688,0.620904237364845  
"4205","ADAM15",141.644359589704,-0.248915255760441,0.181221351114614,  
-1.37354265504297,0.169583710213978,0.621322576525242  
"4206","ACOX3",40.5348473810248,0.348039075526541,0.253366090542923,1.  
37366083512102,0.169547001017196,0.621322576525242  
"4207","PIGN",60.243162717547,0.424675115658116,0.309200778735576,1.37  
346069241725,0.169609173014481,0.621322576525242  
"4208","ELOF1",225.623973514417,-0.317576663457445,0.231211311381407,-  
1.37353428584456,0.169586310087487,0.621322576525242  
"4209","CLASP1",104.766571356188,0.314739557690372,0.229199716081996,1.  
.37321094053089,0.169686779499049,0.621459184123982  
"4210","LINC02478",8.91270976361216,-1.07488530973456,0.78290100368368

5,-1.37295175849442,0.169767344402368,0.621606559135985  
"4211","RPL19",16154.8681471438,-0.361780291037883,0.263538528205453,-  
1.37277950780632,0.169820903170982,0.62165500412745  
"4212","NDUFS5",1385.06614348644,-0.321483140964411,0.234240998799546,  
-1.37244608165082,0.169924613024209,0.621886968131096  
"4213","KLHL21",98.226139200466,0.452068371727105,0.329504841101878,1.  
37196276150411,0.170075030625174,0.622100541251823  
"4214","AC007878.1",12.2479961699622,0.857375666652068,0.6250259754611  
53,1.37174405594821,0.170143128369739,0.622100541251823  
"4215","GPC2",7.01596224115463,-0.890708780773639,0.649327709794869,-1  
.37173998173438,0.170144397140298,0.622100541251823  
"4216","AC005332.1",2.87191115714868,-1.2328529585826,0.89863887753457  
5,-1.37191144229698,0.170091007910265,0.622100541251823  
"4217","XAF1",227.98126264912,0.366692759759939,0.267356439190021,1.37  
155013311393,0.170203526677737,0.622169163798273  
"4218","RPS27A",15388.1246478371,-0.345893881179671,0.252247378573952,  
-1.37124866523941,0.17029745236917,0.622217404188374  
"4219","ARHGAP21",806.027686530916,0.267420792715522,0.195006695778476  
,1.37134159238976,0.170268495734946,0.622217404188374  
"4220","SP140L",59.6131321870906,0.338578721009178,0.246998419789397,1  
.37077282234383,0.17044578558099,0.622381374698249  
"4221","ZNF292",488.778339717326,0.298447962240741,0.217746439918257,1  
.37062154656939,0.170492962640841,0.622381374698249  
"4222","TRIM34",57.2602188227072,0.347929141249179,0.253811234397932,1  
.37081852217655,0.170431535495623,0.622381374698249  
"4223","HAGH",143.136749078275,-0.324285552123592,0.236603457052335,-1  
.37058670301619,0.17050383038279,0.622381374698249  
"4224","SCYL1",164.530000307749,-0.284554746058346,0.207639944760446,-  
1.37042391523768,0.170554610943965,0.622419348414115  
"4225","INTS11",203.075769784626,-0.24591693900684,0.179556582528314,-  
1.36957907944178,0.170818333837497,0.622644742517146  
"4226","CEP85",8.72504365851124,-0.771559379020775,0.563221260865898,-  
1.36990456971489,0.170716693050998,0.622644742517146  
"4227","TMSB10",20719.4558506164,-0.316586834830322,0.23110374203331,-  
1.36989056103077,0.170721066607001,0.622644742517146  
"4228","GPR137",81.1686759340857,-0.376960001828756,0.275198365950943,  
-1.36977558179234,0.170756966664701,0.622644742517146  
"4229","NKG7",42.6775488073661,0.578008035020613,0.421998557359284,1.3  
6969196918013,0.170783076647195,0.622644742517146  
"4230","LST1",23.0095277929909,-0.563469629271526,0.411525522304033,-1  
.36922158829128,0.170930019754883,0.622904551896339  
"4231","UBR4",94.1274644105333,0.410000258000756,0.299548740501742,1.3  
6872636257461,0.171084826484855,0.623321342534636  
"4232","ZMYND12",3.08015795028097,1.29624270094741,0.947219217622323,1  
.36847170837728,0.171164471824617,0.623349540134085  
"4233","ENSA",573.192654477371,-0.329909632732345,0.24112948320018,-1.  
36818454696584,0.171254317383578,0.623349540134085  
"4234","ZBTB24",47.4599509949404,-0.403808928322092,0.29512263359184,-  
1.36827502319109,0.171226005846643,0.623349540134085  
"4235","NLRC3",3.0255750273736,1.6071751531612,1.17452386961013,1.3683

6312547202,0.171198440524853,0.623349540134085  
"4236","GXYLT2",295.828875796515,0.318559585711008,0.232935347393329,1  
.36758799931337,0.171441074953319,0.623882004344997  
"4237","S100PBP",102.909355614984,0.28855469724165,0.211110819332934,1  
.36683992868496,0.171675484328281,0.624587583412898  
"4238","AGBL5",22.215070920077,0.46688971148419,0.342055372372421,1.36  
495359872861,0.172267634451577,0.624725467644042  
"4239","PPM1B",127.958026850426,0.27231458439132,0.199330590355597,1.3  
6614547674555,0.171893306819269,0.624725467644042  
"4240","ROB02",48.0486985118353,0.499206617244369,0.365513945277605,1.  
36576626882245,0.172012336823029,0.624725467644042  
"4241","SNHG8",632.239652943079,-0.347457162993083,0.254598657457676,-  
1.3647250400401,0.172339486454256,0.624725467644042  
"4242","LUC7L2",313.369409650941,-0.180800456986832,0.132317800423918,  
-1.36641069007787,0.171810095342601,0.624725467644042  
"4243","LSM1",219.894483016919,-0.323232417694464,0.236870242716236,-1  
.36459697929084,0.172379754714323,0.624725467644042  
"4244","LINC00824",12.9490087359864,-0.722684456415447,0.5293254354280  
73,-1.3652932733735,0.17216089232578,0.624725467644042  
"4245","SCRIB",51.3821085123105,0.330254519788693,0.241741433650879,1.  
36614776706274,0.171892588096327,0.624725467644042  
"4246","PPIF",72.9467223992335,0.387995568299315,0.284243909888695,1.3  
6500925719481,0.172250140491249,0.624725467644042  
"4247","SEC31B",18.2809382376141,0.608936035035369,0.446201451261988,1  
.36471101407922,0.172343896526016,0.624725467644042  
"4248","CPSF7",149.627089576034,0.242261353782305,0.177626020936916,1.  
36388437068206,0.172603960583773,0.624725467644042  
"4249","CEP295",56.7556990587392,0.369453731418757,0.270707676988921,1  
.36477005575973,0.172325333088386,0.624725467644042  
"4250","AC092794.1",2.90470185322729,1.40181614490557,1.02723659372816  
,1.36464778753446,0.172363777395544,0.624725467644042  
"4251","TUBA1A",3374.97863115074,-0.382502868179716,0.280366113053896,  
-1.36429778910615,0.172473861462685,0.624725467644042  
"4252","MRPL57",394.881819564151,-0.303484602654576,0.222500105276,-1.  
36397509690217,0.172575403560935,0.624725467644042  
"4253","MZT1",105.86456780498,-0.306673244177391,0.224790471413771,-1.  
36426264978509,0.172484916643282,0.624725467644042  
"4254","ITPRIPL2",424.271113198062,-0.375872391642798,0.27540776024828  
3,-1.36478504201895,0.172320621460377,0.624725467644042  
"4255","ZNF844",61.4614693585049,0.605467677820041,0.443423544802719,1  
.3654387208722,0.172115200853291,0.624725467644042  
"4256","PLEKHA4",178.904690160936,-0.512865289950739,0.375482793475446  
, -1.36588226907467,0.171975918827088,0.624725467644042  
"4257","SMIM17",3.96854904253846,1.10248674265528,0.807996668345657,1.  
36446941657888,0.172419873364824,0.624725467644042  
"4258","GSTT2B",6.79246762961403,-1.18026295179861,0.864094030823201,-  
1.36589642989919,0.171971473465978,0.624725467644042  
"4259","GABRE",121.777267130843,0.550800356284968,0.403847771838084,1.  
36388113218513,0.172604979999739,0.624725467644042  
"4260","SLC2A1",4.35293841993702,1.07011883656402,0.785039085651438,1.

36314083734571,0.17283812861936,0.625040073795598  
"4261","AC104794.5",7.91762185948587,-0.754609005236631,0.553601675326  
8,-1.36309017632791,0.17285409241587,0.625040073795598  
"4262","TMEM158",7.94980590893558,-0.885842946221844,0.649788222568796  
, -1.36327947391822,0.172794448476297,0.625040073795598  
"4263","CD99L2",125.793924901338,0.258503461513744,0.18963089568272,1.  
36319274653566,0.172821772654717,0.625040073795598  
"4264","ZDHC13",21.0499451897669,-0.486544895677972,0.357119162413331  
, -1.36241609772495,0.173066606302071,0.625661758008075  
"4265","SRRM3",33.8079155114474,-0.61332012069263,0.450292349226119,-1  
.36204872622574,0.173182508147816,0.625933965556526  
"4266","SF3A3",197.912194489934,-0.25294859927821,0.185838937247963,-1  
.3611173364638,0.173476611822738,0.626047719516421  
"4267","PAIP1",353.838459357161,-0.301419994184284,0.221465909758014,-  
1.36102208467945,0.173506710373292,0.626047719516421  
"4268","HOMER1",14.6978493409798,-0.672960892336936,0.494248631084336,  
-1.36158372530142,0.173329294234165,0.626047719516421  
"4269","PRR3",30.2055330906219,0.434652509877567,0.319281049130493,1.3  
6134766238481,0.173403847406756,0.626047719516421  
"4270","HAS2-  
AS1",56.421624448867,-0.340489066155575,0.250190309965438,-1.360920277  
85813,0.173538884560082,0.626047719516421  
"4271","RSL24D1",797.391979901404,-0.323163209820326,0.237450074337922  
, -1.36097329394988,0.173522129236126,0.626047719516421  
"4272","NORAD",1096.26309858396,0.193400615854573,0.142078963309956,1.  
36121922168489,0.173444421495792,0.626047719516421  
"4273","USP51",58.9407702369928,0.328007237605647,0.240891778615525,1.  
3616373273127,0.173312369034325,0.626047719516421  
"4274","LHCGR",13.33092255715,-0.615076021985668,0.452182568689314,-1.  
3602382413115,0.173754544744134,0.62665529002847  
"4275","TMEM126A",181.521847021798,-0.392004455163691,0.28821089791898  
5,-1.36013057796962,0.173788606219378,0.62665529002847  
"4276","ZNF879",9.9542030672644,0.698764706621535,0.513953145014845,1.  
35958834652399,0.173960227932257,0.627120629053206  
"4277","DCP1B",43.1359331707685,0.342864406768846,0.252205240172044,1.  
35946583241077,0.173999022410675,0.627120629053206  
"4278","CHST12",263.672844042668,-0.23509736040455,0.172968878137075,-  
1.35918879128209,0.174086772181779,0.627290227485304  
"4279","DGKD",34.2642786527482,0.419080239481782,0.308401408382718,1.3  
5887913638097,0.174184891124946,0.627497101353362  
"4280","APOL3",310.762458759656,0.260554432459049,0.19178446605389,1.3  
5857943982718,0.174279893936525,0.627692655381201  
"4281","CAPZA1",358.960053861217,0.250156090172343,0.18427858352559,1.  
35748867495286,0.174625989484581,0.627873643727822  
"4282","TRAPPC11",95.2404641107867,0.337658704240037,0.248837803835939  
, 1.3569429525373,0.174799337586961,0.627873643727822  
"4283","AGGF1",181.839830786363,0.219973352883413,0.161987044282672,1.  
3579688045888,0.174473583009102,0.627873643727822  
"4284","NRG2",4.65005410091052,-1.10562449022584,0.814462736930532,-1.  
35748934861356,0.17462577557637,0.627873643727822

"4285", "NOP16", 40.2158255853758, -0.45934973228677, 0.338584265516344, -1.35667772861878, 0.17488363203004, 0.627873643727822  
"4286", "SLC25A27", 26.8442476001155, 0.564449111044752, 0.416028638717912, 1.35675542141578, 0.174858936277536, 0.627873643727822  
"4287", "RHBDD2", 99.2173644367412, -0.422716356080054, 0.311431711414393, -1.35733241216912, 0.174675613061285, 0.627873643727822  
"4288", "SNAPC4", 56.6488823143932, 0.373020502772214, 0.274748870019074, 1.35767802337574, 0.174565873173796, 0.627873643727822  
"4289", "APLP2", 1496.59359822002, 0.246147697794665, 0.181244465098157, 1.35809773645423, 0.17443267337631, 0.627873643727822  
"4290", "LRP1", 3719.96732751655, 0.24251435809334, 0.178638770147152, 1.35756844885112, 0.174600660152099, 0.627873643727822  
"4291", "BAZ1A", 192.230801049617, -0.323164171400053, 0.237967611359036, -1.35801746109254, 0.174458143628044, 0.627873643727822  
"4292", "PPP2R3C", 158.408682865333, -0.29862967724742, 0.220036564736233, -1.35718205565243, 0.174723370951844, 0.627873643727822  
"4293", "CTNS", 45.5053453393929, 0.370764529658879, 0.273299195724366, 1.35662503022076, 0.1749003844416, 0.627873643727822  
"4294", "MICOS13", 633.074944937921, -0.345064420335417, 0.254312057341685, -1.35685434635842, 0.174827495355037, 0.627873643727822  
"4295", "PRPS2", 78.5745217177309, -0.39288231232017, 0.289641627455455, -1.35644284204484, 0.17495830987632, 0.627935354305814  
"4296", "CASTOR2", 51.2846466924749, 0.382921931898304, 0.282444669043518, 1.3557414030686, 0.175181461093924, 0.628589902877755  
"4297", "FGF7", 1629.75061047363, 0.240215151269405, 0.177206536351261, 1.35556597524849, 0.175237303741046, 0.628623319663178  
"4298", "ACLY", 218.566283156472, 0.236930694553472, 0.174797782623285, 1.35545595028566, 0.175272333954741, 0.628623319663178  
"4299", "FAM66D", 11.4976573773217, 0.767342544131935, 0.566242216289252, 1.35514894873178, 0.175370106038572, 0.628827677270199  
"4300", "SETD5", 321.8035914236, 0.270281866231438, 0.199600764219141, 1.35411238172764, 0.175700526556356, 0.629440080613154  
"4301", "POU5F1", 2.6197375236684, 1.31848371771148, 0.97356546928215, 1.35428356829834, 0.175645926408591, 0.629440080613154  
"4302", "ACBD5", 130.96837083696, 0.276002939369385, 0.20382747245219, 1.3541007796882, 0.175704227497788, 0.629440080613154  
"4303", "PPIL2", 78.2061025163106, 0.310323248831586, 0.229117177083927, 1.35443030846139, 0.175599133544516, 0.629440080613154  
"4304", "TADA1", 19.1995023264691, 0.50790390677392, 0.375220862413078, 1.35361318533182, 0.175859818084671, 0.629457436765961  
"4305", "TPRKB", 230.182462869415, -0.32391563582447, 0.239289285019304, -1.35365708413704, 0.175845805837961, 0.629457436765961  
"4306", "IGFBP3", 756.396965111686, -0.524455964698404, 0.387496825431909, -1.35344583562417, 0.175913242788697, 0.629457436765961  
"4307", "RPP38", 77.9906715022406, -0.306157651570664, 0.226203449931039, -1.35346145986721, 0.175908254394728, 0.629457436765961  
"4308", "SCGB1B2P", 2.42964772425544, 1.63211293953687, 1.20565526487936, 1.35371443818162, 0.175827500010621, 0.629457436765961  
"4309", "MIGA1", 217.298547060113, 0.300422479229791, 0.222001526980187, 1.35324510293392, 0.175977340636825, 0.629540660458728

"4310", "PUM2", 199.428588013435, 0.257471225523571, 0.19035488174643, 1.35258535615885, 0.176188133285059, 0.629877114390102  
"4311", "CENPP", 20.8387696993431, 0.532379267749763, 0.393643753002397, 1.35243926440901, 0.176234835832923, 0.629877114390102  
"4312", "TRUB2", 92.9293255510673, -0.279593086994632, 0.206698181386988, -1.35266350733473, 0.176163153739209, 0.629877114390102  
"4313", "AC103703.1", 6.60589088809072, 0.880392205239493, 0.650943409605073, 1.35248654836774, 0.17621971910727, 0.629877114390102  
"4314", "SPAG1", 20.9197579931715, -0.542004692210844, 0.400885802287983, -1.35201767964206, 0.176369659613711, 0.630212865773146  
"4315", "DAZAP1", 173.109761888018, -0.215752614972588, 0.15963348822734, -1.35154983686961, 0.176519366796805, 0.630601631326245  
"4316", "HMOX1", 83.6585998156862, 0.405817523709862, 0.300299539265864, 1.35137577867071, 0.176575088655589, 0.630654539301646  
"4317", "SAP30", 133.553829610269, -0.357757223910612, 0.264787681553195, -1.35110977146699, 0.176660271795107, 0.630682357386488  
"4318", "FAM204A", 463.250128982235, -0.233339773302313, 0.172715668695259, -1.35100523921787, 0.176693754401243, 0.630682357386488  
"4319", "ZNF480", 93.0272252804768, -0.304510501141183, 0.225401678641585, -1.35096820474612, 0.176705618005335, 0.630682357386488  
"4320", "RPL32", 17708.9105109309, -0.346525846821399, 0.256541889794656, -1.35075736402647, 0.176773169925037, 0.630777410739456  
"4321", "ATP5MG", 1674.04422823778, -0.323541598826649, 0.239579234264844, -1.35045760463943, 0.17686924390043, 0.630974171424469  
"4322", "MELTF-AS1", 16.830166702109, 0.593842817297923, 0.440250169294289, 1.3488758408653, 0.177376849322673, 0.632412398602537  
"4323", "ISOC1", 57.6792603902236, -0.385732422009629, 0.28594168243972, -1.34898983148757, 0.17734023223771, 0.632412398602537  
"4324", "KLHDC10", 148.795271123017, 0.315607191347208, 0.233987996341682, 1.34881787220547, 0.177395472692661, 0.632412398602537  
"4325", "PACSIN3", 18.1791127030704, 0.610913748074569, 0.45300015413659, 1.34859501149389, 0.177467083863597, 0.632521409886093  
"4326", "KLHL35", 15.1437008832905, 0.597517581703054, 0.443217291598941, 1.34813689138224, 0.17761435784738, 0.632899982944373  
"4327", "SEC24B", 100.936153841359, 0.306161036230719, 0.227144146611626, 1.34787112412013, 0.177699836974477, 0.633058235951367  
"4328", "FH", 144.60971032259, -0.388703545870333, 0.288473028283163, -1.34745195481078, 0.177834717279914, 0.633102089494832  
"4329", "ANKRD36C", 237.459630633759, -0.616793670280314, 0.457883459570111, -1.34705383518199, 0.177962894777877, 0.633102089494832  
"4330", "NSUN3", 63.3824409334133, 0.302357164589044, 0.224380032127464, 1.34752260137517, 0.177811979288762, 0.633102089494832  
"4331", "MAATS1", 8.72416108001498, -0.966710436191285, 0.717708747851453, -1.34693974273722, 0.177999640341914, 0.633102089494832  
"4332", "ERBIN", 222.627286619249, 0.290510859922695, 0.215622491994662, 1.34731241270455, 0.177879636046252, 0.633102089494832  
"4333", "PDK4", 2781.90246754961, 0.428751912759204, 0.318265341361993, 1.34715238211108, 0.177931160477485, 0.633102089494832  
"4334", "EXOC3L4", 13.3802742589159, 0.644531238827838, 0.478423853713735,



1.34719712201786,0.177916754624034,0.633102089494832  
"4335","CCL8",53.1173784140192,-1.64786709607533,1.2240046673637,-1.34  
629151343399,0.178208521680644,0.633698814695994  
"4336","AP003307.1",27.9595179763256,-0.58298542736539,0.4332493888159  
03,-1.34561165558415,0.178427790740824,0.634332194250415  
"4337","UQCRC1",282.760884283544,-0.231268881651941,0.171929622921952,  
-1.34513690963498,0.178581025710358,0.634584258027932  
"4338","NUP85",86.4003765599981,0.288324988062717,0.214341688311932,1.  
34516523749275,0.178571879509045,0.634584258027932  
"4339","PTPDC1",39.1739786687537,0.376016718165946,0.279602011665379,1  
.34482837203601,0.178680665662602,0.634654867509108  
"4340","TRIM29",11.2333692616348,-0.586072736604495,0.435800002673391,  
-1.34482040617087,0.178683238727832,0.634654867509108  
"4341","CASZ1",3.31594668161646,1.32450434599972,0.98548795242673,1.34  
400866366573,0.178945585353118,0.634709203455665  
"4342","BTBD8",69.0163165240117,0.426955304093342,0.317625279892951,1.  
34421071344585,0.17888025822916,0.634709203455665  
"4343","PRKCD",29.4513527183634,-0.431557616319233,0.321091600054929,-  
1.34403271915368,0.178937806756039,0.634709203455665  
"4344","NIM1K",3.22884243581637,-1.20157012673589,0.893953853921178,-1  
.34410755260509,0.178913610174153,0.634709203455665  
"4345","DVL2",95.6948320473033,0.26354760007867,0.196051064387182,1.34  
428038379934,0.178857736389662,0.634709203455665  
"4346","UTP6",121.995258938143,-0.29096821814844,0.216482156949274,-1.  
34407482930162,0.178924190598682,0.634709203455665  
"4347","EIF2B1",215.096616479557,-0.239259090361721,0.178076976731701,  
-1.34357116092666,0.179087100386737,0.635065022420417  
"4348","AC090229.1",2.89612551421639,1.31108506032557,0.97618705153550  
3,1.34306745645036,0.179250132144194,0.635496961132186  
"4349","C8orf89",4.17514921013062,1.09961865002338,0.818816689696846,1  
.3429362931409,0.179292603285365,0.635501374946863  
"4350","AC008011.2",3.27440569205147,-1.23871980782732,0.9224983634640  
13,-1.34278808167842,0.179340603682064,0.635525380634257  
"4351","AC068790.9",2.48559988117905,1.39767069901759,1.0410513540175,  
1.34255691962156,0.179415487883275,0.635600588818022  
"4352","TTC9",4.49394767345408,1.14187122983758,0.850576111246982,1.34  
246802224853,0.179444292087968,0.635600588818022  
"4353","USP9X",260.329513725453,0.249093835575855,0.1856018037963,1.34  
208736381268,0.179567670534008,0.635891486625712  
"4354","ZNF451",224.894462352165,0.336132346101326,0.250517131007757,1  
.34175393414879,0.179675793059267,0.636128238403446  
"4355","MED20",30.0970030267819,0.50822198559851,0.37890839754302,1.34  
12792878015,0.179829791925585,0.636381139240792  
"4356","NIP7",83.7040084004337,-0.260695266255609,0.194347006974636,-1  
.34139069242076,0.179793637923072,0.636381139240792  
"4357","PKIA",38.7608387737059,-0.411282994654984,0.306694196503733,-1  
.3410198149934,0.179914019259668,0.636533074796368  
"4358","GGPS1",175.610461076786,-0.274998664996099,0.205135640205516,-  
1.34056990155679,0.180060134909349,0.636781107139018  
"4359","TFAM",192.533231530701,-0.240777424540245,0.179610983220883,-1

.34054956006861,0.180066743173466,0.636781107139018  
"4360","SUMF1",164.971387976319,0.215771537100485,0.160983245663035,1.  
34033536354542,0.180136339346345,0.63688111720732  
"4361","AC012020.1",3.46592009342714,1.29306509026214,0.96520531564269  
4,1.33967879093282,0.180349795719667,0.636905406877127  
"4362","AC004540.1",37.0775884677813,0.606200124379967,0.4524306296316  
8,1.33987419214625,0.18028624978185,0.636905406877127  
"4363","DCUN1D5",165.437284284855,-0.269716993683575,0.201300728556437  
,-1.33987092653744,0.180287311645601,0.636905406877127  
"4364","UBE2N",298.767374634448,-0.279469772073035,0.208590577304568,-  
1.33980055899157,0.18031019388184,0.636905406877127  
"4365","ZXDB",34.0230749156992,0.466892586560788,0.348476010841736,1.3  
3981270456184,0.180306244210941,0.636905406877127  
"4366","WDR55",92.1823113564424,-0.261390208253596,0.195171854716878,-  
1.33928228859011,0.18047879238371,0.637069059902655  
"4367","RPS21",6960.20157797836,-0.37270498363119,0.278279826287996,-1  
.33931729296637,0.180467401426969,0.637069059902655  
"4368","SNX27",284.988859166691,0.19729845464838,0.147427836211405,1.3  
3827138563889,0.180807986038128,0.637812615025204  
"4369","ZBTB10",165.322952464506,0.313202708764773,0.23400447386515,1.  
33844752449161,0.180750595568635,0.637812615025204  
"4370","SLC2A6",5.6269120881912,-0.8460418558733,0.632198141067029,-1.  
33825426067426,0.180813566504064,0.637812615025204  
"4371","OTUD5",132.379558564932,0.253085417704974,0.189159855465872,1.  
33794465576041,0.180914478679021,0.638022578091308  
"4372","PRDX1",1982.09790390218,-0.352502766214126,0.263614934324586,-  
1.33718814951543,0.181161229131909,0.638042995171808  
"4373","ARL15",37.0355890303761,0.384798567574217,0.287808605303273,1.  
33699465715677,0.181224380843988,0.638042995171808  
"4374","KIAA1324L",24.1652953261151,-0.61517256740915,0.46014443288340  
5,-1.33691189862777,0.181251396422792,0.638042995171808  
"4375","FUS",1336.56035014272,0.341585143178404,0.255454382715059,1.33  
716689276542,0.181168166075539,0.638042995171808  
"4376","SPG7",243.786832149327,0.334521778731433,0.2502068225803,1.336  
98104344886,0.181228824678404,0.638042995171808  
"4377","NXP3",118.504835718216,0.407646950773816,0.304895516137582,1.  
33700539757976,0.181220874974417,0.638042995171808  
"4378","SKA2",138.075079448269,0.337883915675641,0.252623998498191,1.3  
3749729908602,0.181060363316181,0.638042995171808  
"4379","AC090360.1",3.45498729875605,1.20587029815395,0.90193200887722  
1,1.33698581077646,0.18122726850136,0.638042995171808  
"4380","MALINC1",24.2215992022722,-0.425319661939262,0.318270460484952  
,-1.33634664458397,0.18143599710508,0.63823924684402  
"4381","SPAAR",4.84041503757321,1.13453770488124,0.848899407427153,1.3  
3648073606247,0.181392192887064,0.63823924684402  
"4382","GALK2",120.227568044735,0.288752696037601,0.216094388984225,1.  
33623412155639,0.181472761525614,0.63823924684402  
"4383","RBFADN",3.56052853981436,1.11851442817444,0.83689303219569,1.3  
3650823360291,0.181383211121664,0.63823924684402  
"4384","SMYD3",64.5946051307335,-0.333146319747837,0.249415230054296,-

1.3357096103366,0.181644206962215,0.638410511423487  
"4385","SLC5A6",18.5287787280214,-0.519112120345185,0.388679634381122,-  
-1.33557839008402,0.181687117328241,0.638410511423487  
"4386","DLG1",161.212171546862,0.302871105322525,0.226761651491656,1.3  
3563635354662,0.181668161755232,0.638410511423487  
"4387","NUCB2",860.771223888264,-0.282470328138973,0.211441052766808,-  
1.33592944436623,0.181572335836471,0.638410511423487  
"4388","ZNF596",13.3954091030856,0.595307191113782,0.445997767562019,1  
.33477616797936,0.181949615729908,0.638689535310406  
"4389","NIBAN2",63.4917781779763,-0.458273100231388,0.343306707005325,-  
-1.33487954321929,0.181915774109433,0.638689535310406  
"4390","THOP1",42.8407995654635,-0.339797068654713,0.25458634716883,-1  
.33470263599554,0.181973690501674,0.638689535310406  
"4391","ZNF529-  
AS1",14.9155849161926,0.551465352596265,0.413154925903287,1.3347664956  
2047,0.181952782377898,0.638689535310406  
"4392","RNF215",51.5879600923838,-0.353995134100991,0.265204342844135,-  
-1.33480142257338,0.181941347783467,0.638689535310406  
"4393","MOB1A",430.182208029271,0.164532318569129,0.123308082927578,1.  
33431900539532,0.182099331572533,0.638839598586844  
"4394","TBL1XR1",537.884241177547,0.226161834244056,0.169481760150751,  
1.33443170547019,0.182062415023325,0.638839598586844  
"4395","FBX06",59.8904300549439,0.360114814106965,0.270134456987663,1.  
33309470447679,0.182500726977938,0.638939065719945  
"4396","PSMA5",351.161595103018,-0.337980117386723,0.253460035638558,-  
1.33346512216503,0.182379213857483,0.638939065719945  
"4397","DVL3",174.003506800005,0.300520292733134,0.225310852838841,1.3  
3380300569937,0.182268425686786,0.638939065719945  
"4398","MTHFD2L",29.6951093541673,-0.450756983415187,0.338122348825126  
, -1.33311798223759,0.182493089092277,0.638939065719945  
"4399","DNAJB9",181.646969855547,-0.296939609421712,0.222688923448158,-  
-1.33342783657059,0.182391442438702,0.638939065719945  
"4400","ZNF33B",32.1173356123196,-0.38037889878194,0.285255217299548,-  
1.33346868247637,0.182378046211602,0.638939065719945  
"4401","MRPL23",101.005671951645,-0.440768088434158,0.330589240665702,-  
-1.33328019855271,0.182439869347817,0.638939065719945  
"4402","BAD",577.828979559439,-0.33467866877867,0.250922841906885,-1.3  
3379116159886,0.182272308388438,0.638939065719945  
"4403","RPS4X",19677.3276976014,-0.350771963247302,0.263031785919561,-  
1.33357252630514,0.182343991848222,0.638939065719945  
"4404","USO1",333.322619610233,0.2211031430612,0.165936457418391,1.332  
45669156183,0.182710163701015,0.639236762017963  
"4405","RPS6KA2",41.5475408119194,0.545707590703029,0.409537351497374,  
1.33249772873654,0.182696687311282,0.639236762017963  
"4406","C15orf48",9.11065059387824,-0.885773350048843,0.66470005394298  
1,-1.33259106087695,0.182666040276946,0.639236762017963  
"4407","RAB9B",41.7640887794878,0.402897685869758,0.302413792080668,1.  
33227285401813,0.182770544016998,0.639302912643981  
"4408","ACAT2",80.878207573562,-0.409658313264853,0.307607607938401,-1  
.33175611621052,0.182940342606261,0.639461537704196

"4409", "CCDC122", 49.2286433281797, -0.427822531630518, 0.321224045458347, -1.33185089248244, 0.182909190637611, 0.639461537704196  
"4410", "ADPRHL1", 9.69057191417014, 0.684463349226752, 0.513873334878778, 1.33196899463214, 0.182870377199708, 0.639461537704196  
"4411", "GSDME", 64.2683523051355, 0.518869977505934, 0.389712453350133, 1.33141749268084, 0.183051676740775, 0.639705644289061  
"4412", "AC002451.1", 43.8827082850005, 0.409769675889893, 0.307859435003978, 1.33102848020428, 0.183179639944148, 0.639937056269662  
"4413", "SYMPK", 98.4391226466352, 0.289382169965108, 0.217423021076902, 1.33096379827578, 0.183200923082583, 0.639937056269662  
"4414", "ZMPSTE24", 200.643071165984, -0.203894174080667, 0.153231071241093, -1.33063204759471, 0.183310112136694, 0.639962208394874  
"4415", "NCL", 1320.21238181235, -0.279678180188304, 0.210195285294898, -1.33056352713108, 0.183332670273874, 0.639962208394874  
"4416", "XP05", 27.3338736302786, 0.430368927802812, 0.323432034924282, 1.33063172886868, 0.183310217062127, 0.639962208394874  
"4417", "NDUFS3", 374.686998355626, -0.370921834826056, 0.27880477812451, -1.33039984938998, 0.183386564178684, 0.640005407927193  
"4418", "BCL2L12", 54.4025491065813, -0.340238701922701, 0.255868770333502, -1.32973907475786, 0.183604255718582, 0.640620100023074  
"4419", "PPP3CB", 251.300800713301, 0.20468945668917, 0.153962672013615, 1.32947456686819, 0.183691451206025, 0.640634325868978  
"4420", "ZNF112", 8.65253006247327, 0.67169648440926, 0.50522984358851, 1.32948695120301, 0.183687368004144, 0.640634325868978  
"4421", "TWIST2", 582.64057508732, -0.290448959500266, 0.218598093013457, -1.32868935632657, 0.183950477900651, 0.641102558634078  
"4422", "GNA12", 189.707126624626, 0.255447779664138, 0.192253756057067, 1.32870111306597, 0.183946597572301, 0.641102558634078  
"4423", "LINC00641", 21.3381984043264, 0.699020518746921, 0.526079972341452, 1.32873432842492, 0.183935635123967, 0.641102558634078  
"4424", "PEX11B", 49.7724778708162, 0.337390083643918, 0.253990353241361, 1.32835786610881, 0.184059911663224, 0.641338955309359  
"4425", "SRGN", 191.410662696553, -0.42472517175946, 0.319834201671931, -1.32795420108048, 0.184193237338855, 0.641390163696861  
"4426", "RIMKLB", 116.044613753118, 0.307343979315555, 0.231403858021128, 1.32817137079665, 0.184121499925387, 0.641390163696861  
"4427", "BAZ2A", 178.4404054675, 0.349424867556956, 0.263139233847791, 1.32790866054994, 0.184208283312379, 0.641390163696861  
"4428", "TM9SF4", 142.468551466914, 0.263097880340384, 0.198144294194487, 1.32780952088452, 0.184241040859533, 0.641390163696861  
"4429", "TRA2B", 803.340902178767, 0.266304897647142, 0.200678947170696, 1.32701960719689, 0.184502196783317, 0.642009337113959  
"4430", "NDUFC1", 688.6003735982, -0.31190546618942, 0.235023890858783, -1.32712238338711, 0.184468202116704, 0.642009337113959  
"4431", "LINC00345", 6.38209265861244, -1.21223437276329, 0.913915249541674, -1.32641880455679, 0.184701013470035, 0.642467872489987  
"4432", "NUP62", 130.642260613953, 0.235382656476582, 0.177463860577127, 1.32636952510274, 0.184717327984147, 0.642467872489987  
"4433", "NABP2", 131.739364369054, -0.275901803821761, 0.208041597330768, -1.3261857597791, 0.184778174951772, 0.642534528960425

"4434", "CDK11B", 89.507443050149, -0.329802213610257, 0.248801467339733, -1.32556378037723, 0.184984230067036, 0.642746429454909  
"4435", "MEX3A", 7.48227378585747, -0.822612718076587, 0.620670531571514, -1.32536132494282, 0.18505133804575, 0.642746429454909  
"4436", "ABCB8", 60.9927021211415, -0.344060365631888, 0.259564116049225, -1.3255313210037, 0.184994988175596, 0.642746429454909  
"4437", "ABCF2", 72.2542270393286, -0.321676132772269, 0.242752398991073, -1.32512030410088, 0.185131252796572, 0.642746429454909  
"4438", "C11orf98", 10.5466854060936, 0.878185203516826, 0.662817502711487, 1.32492760062054, 0.185195165429968, 0.642746429454909  
"4439", "ATP5MC2", 1679.21818825883, -0.352616407728367, 0.26615176767345, -1.32486968172612, 0.185214378179611, 0.642746429454909  
"4440", "PSMC6", 424.693786929538, -0.233862793072651, 0.176421542810107, -1.32559090770661, 0.184975239529099, 0.642746429454909  
"4441", "BAIAP2", 59.0650245542658, -0.513112747313121, 0.387120623159487, -1.3254596025532, 0.18501875968029, 0.642746429454909  
"4442", "COL5A3", 186.935851980537, 0.520363968093275, 0.392662240982757, 1.32522028802898, 0.185098098247141, 0.642746429454909  
"4443", "TRAF5", 92.6819719096871, 0.268590943009235, 0.202801359211929, 1.32440405751204, 0.185368887765228, 0.642848460045216  
"4444", "ROR2", 13.6478786260191, 1.00128045216401, 0.755961295487632, 1.32451285289432, 0.1853327773101, 0.642848460045216  
"4445", "MPRIIP-AS1", 3.43731614268384, -1.07983191265727, 0.815218203581893, -1.32459249304385, 0.185306347114941, 0.642848460045216  
"4446", "AC145124.1", 50.5286299543029, -0.348533017409817, 0.263232905792176, -1.32404805683749, 0.185487084910351, 0.643053970179427  
"4447", "PTPRA", 907.848213904656, 0.253605489899235, 0.191548649993006, 1.323974300568, 0.185511579979754, 0.643053970179427  
"4448", "AL157700.1", 7.62585340504277, 0.730723144917079, 0.552094361861313, 1.32354755888748, 0.1856533513966, 0.643400722072525  
"4449", "NUDT8", 69.9137970479828, -0.338838997670667, 0.256043382070674, -1.32336557551462, 0.185713833973035, 0.643465666597962  
"4450", "LARP1", 323.837740025129, 0.231965114920357, 0.175319942653253, 1.32309600043126, 0.18580345462145, 0.643631517525765  
"4451", "KLRC3", 3.60440894055229, 1.35724824337094, 1.02613713990959, 1.32267724320994, 0.185942734506992, 0.643969277111948  
"4452", "TIFA", 89.081737778355, -0.492359085242452, 0.372366848791831, -1.32224199560177, 0.18608758092778, 0.644036834306629  
"4453", "MSM01", 77.4195086599956, -0.350515371679536, 0.265070474459454, -1.32234784879126, 0.186052346282256, 0.644036834306629  
"4454", "NCOA5", 47.50806124443, 0.316660484313857, 0.239447348580705, 1.3224639411997, 0.186013709046412, 0.644036834306629  
"4455", "GLG1", 932.418118506442, 0.279841712532083, 0.211662026360904, 1.32211581521442, 0.186129588195639, 0.644037621107919  
"4456", "CYCS", 417.987716953146, -0.305990076249394, 0.231463929343182, -1.32197736864527, 0.186175687115587, 0.644052562137965  
"4457", "LINC01715", 3.50773865223161, -1.09391470589486, 0.828263450919742, -1.32073279906306, 0.186590473685556, 0.644330679180745  
"4458", "HIST2H4B", 2.44444636872386, 1.45682445543117, 1.10236564609112, 1

.32154377324523,0.186320117119913,0.644330679180745  
"4459","PTH1R",89.0650128357434,0.475200036058045,0.359761468201581,1.  
32087529671683,0.186542947895308,0.644330679180745  
"4460","TNRC18",238.744202365639,0.264272092279466,0.200065722246247,1.  
.32092639014989,0.186525909401843,0.644330679180745  
"4461","TOLLIP-  
AS1",14.7811361479785,-0.724471959437254,0.548477352839231,-1.32087852  
978245,0.186541869707653,0.644330679180745  
"4462","INPPL1",73.800003887584,0.277744809840985,0.210243135065266,1.  
32106482218677,0.186479751256203,0.644330679180745  
"4463","AC009041.2",14.7204635639329,0.596369696589801,0.4515359818603  
71,1.32075785883708,0.186582115106301,0.644330679180745  
"4464","UBN1",176.517912672829,0.291034374904871,0.220270944926581,1.3  
2125630550991,0.186415917844343,0.644330679180745  
"4465","HERC6",16.8971927071059,-0.558645964532017,0.423127722005087,-  
1.32027739020442,0.186742421541227,0.644422303124696  
"4466","TMP0-  
AS1",4.13356905435515,1.03859086167215,0.786522044657478,1.32048538083  
181,0.18667301381674,0.644422303124696  
"4467","HORMAD2-  
AS1",4.41405469094681,1.38810626747771,1.05132814054672,1.320335881769  
38,0.186722900627376,0.644422303124696  
"4468","HES1",240.568444618746,-0.327690587909528,0.248233437114458,-1.  
.3200904427651,0.186804823294103,0.644493364162624  
"4469","DUSP7",38.2683927986622,-0.497130636125616,0.37664574398857,-1.  
.31988916391606,0.186872025989947,0.644580953375482  
"4470","RHBDL2",3.33830856858727,1.44405719267698,1.09632169418806,1.3  
1718381596603,0.187777017398282,0.644660305212947  
"4471","ADGRL4",6.20438512112132,-1.20880964155251,0.916353700526558,-  
1.31915180880254,0.1871183656018,0.644660305212947  
"4472","PRPF38B",294.982238952998,-0.203865799291658,0.154960416197976  
, -1.31559919812812,0.18830860285539,0.644660305212947  
"4473","MRPL24",204.434989256629,-0.269721721604514,0.204782845125985,  
-1.317110920295,0.187801447091019,0.644660305212947  
"4474","RXRG",10.4046682984934,-0.712929099999785,0.540669456075253,-1.  
.31860435611616,0.18730141663772,0.644660305212947  
"4475","YIPF4",389.375655759774,0.196173702401927,0.148866146670545,1.  
3177858552091,0.187575344283402,0.644660305212947  
"4476","NIFK",275.06948069175,-0.25873720220291,0.196676596840709,-1.3  
1554646744505,0.188326311275092,0.644660305212947  
"4477","DENND6A",134.869799585645,0.326727993240715,0.24826716255255,1.  
.31603386400953,0.188162676843025,0.644660305212947  
"4478","FAM200B",420.24569931413,-0.328154548606922,0.249188134337716,  
-1.3168947609768,0.187873902848047,0.644660305212947  
"4479","BTF3",4152.90443951176,-0.336965465344566,0.255395024003332,-1.  
.3193893133179,0.187038992632138,0.644660305212947  
"4480","UBE2D2",697.851932324178,-0.290329253953362,0.220837812201196,  
-1.31467184473308,0.188620212937991,0.644660305212947  
"4481","NOL7",659.469861429426,-0.327020996451432,0.247953747205678,-1.  
.31887902536987,0.187209559319317,0.644660305212947

"4482", "MRPL2", 180.889914002043, -0.36221242608181, 0.27528749409034, -1.31576055526498, 0.188254422303175, 0.644660305212947  
"4483", "SGCE", 1008.1117191406, 0.329515321480879, 0.250568538999015, 1.31507061021007, 0.188486172846305, 0.644660305212947  
"4484", "FGFR1", 1985.97592736019, 0.235333073919196, 0.178425486963079, 1.31894315058191, 0.187188118789903, 0.644660305212947  
"4485", "AC040970.1", 4.75413596115519, -0.943601874975759, 0.717284724329621, -1.31551926727236, 0.188335446324579, 0.644660305212947  
"4486", "GPR107", 120.218509232173, 0.297149634179567, 0.225987288726286, 1.3148953459036, 0.188545077122514, 0.644660305212947  
"4487", "PLXDC2", 747.696107727177, 0.45181586033111, 0.342726946030655, 1.31829687033332, 0.187404288225725, 0.644660305212947  
"4488", "ITGB1", 2154.34269662502, 0.227355280090774, 0.172625523345449, 1.3170432487889, 0.187824128096942, 0.644660305212947  
"4489", "SCD", 4.20412961018182, 1.17017494356188, 0.890088454899693, 1.31467264530888, 0.188619943763907, 0.644660305212947  
"4490", "EDRF1-DT", 32.8089982138613, 0.50784020837459, 0.385686625946753, 1.31671718491141, 0.187933441083431, 0.644660305212947  
"4491", "STK32C", 52.3655866284676, -0.337815302565952, 0.256951365529815, -1.31470522396097, 0.188608990227322, 0.644660305212947  
"4492", "CXCR5", 2.8236251218493, 1.53974833952353, 1.16818735276501, 1.31806626383949, 0.187481466661996, 0.644660305212947  
"4493", "ZBTB44", 305.402124117639, 0.2433792744318, 0.184964130204245, 1.31581877071544, 0.188234877523624, 0.644660305212947  
"4494", "SP1", 214.531566740694, 0.284241158365971, 0.216144959687802, 1.31504874680643, 0.18849352013853, 0.644660305212947  
"4495", "H0XC10", 214.777473445, -0.218406730764573, 0.165687523439637, -1.31818453333417, 0.187441881781556, 0.644660305212947  
"4496", "ORAI1", 65.0739568096621, 0.423728615699282, 0.32233031759551, 1.31457884216469, 0.188651484710711, 0.644660305212947  
"4497", "CEP128", 18.4196486566305, 0.571359981192642, 0.434350897789537, 1.31543409740917, 0.188364052334977, 0.644660305212947  
"4498", "CHP1", 261.920766105087, -0.292565839604611, 0.221917211925862, -1.31835578261658, 0.187384575466367, 0.644660305212947  
"4499", "HACD3", 276.214843559927, 0.269402218268245, 0.204371954697576, 1.31819563338277, 0.187438166904494, 0.644660305212947  
"4500", "NOL3", 38.8344940969078, 0.422214514169892, 0.321079258364441, 1.31498532892043, 0.188514833191014, 0.644660305212947  
"4501", "CISD3", 209.658815887441, -0.312455647652249, 0.237519223816849, -1.31549624755082, 0.188343177644678, 0.644660305212947  
"4502", "TOB1", 263.53230225194, 0.350635674889939, 0.266190231376707, 1.3172371994137, 0.187759128369356, 0.644660305212947  
"4503", "ME2", 100.033123936057, -0.343402836397087, 0.260551129123711, -1.31798636817282, 0.187508211288628, 0.644660305212947  
"4504", "SH3GL1", 331.233939533548, -0.252915533227808, 0.191912180059502, -1.31787119061121, 0.187546771288468, 0.644660305212947  
"4505", "ZNF490", 24.9919754332429, 0.513719912796722, 0.390155010776957, 1.31670720253905, 0.187936788416467, 0.644660305212947  
"4506", "DMAC2", 83.2902325069618, -0.360151841243505, 0.273283762656667, -

1.31786769086597,0.187547943050813,0.644660305212947  
"4507","CARD8",62.0353907261,0.299247321286052,0.227339928566626,1.316  
29900287556,0.188073705411799,0.644660305212947  
"4508","AC010332.3",7.24889606414297,-0.807420315449058,0.612701515441  
71,-1.31780368597093,0.187569373714138,0.644660305212947  
"4509","CABLES2",7.17057550790237,0.727715815417429,0.55246059975846,1  
.31722663251568,0.187762669283668,0.644660305212947  
"4510","AL031595.3",8.50614257979122,0.79794984970388,0.60664741588467  
5,1.31534368862386,0.18839442144952,0.644660305212947  
"4511","CCDC120",13.8677371961122,0.558352219827862,0.424493917985098,  
1.31533620664846,0.188396934873367,0.644660305212947  
"4512","FAM136A",168.670233345653,-0.25647398706342,0.195304699849821,  
-1.31319925870005,0.189115813724273,0.645120416922998  
"4513","AC092683.1",86.5129117925988,-0.516119525735805,0.393000279638  
323,-1.31328030150714,0.189088513722009,0.645120416922998  
"4514","MFAP3",14.7101972540933,-0.532502094046086,0.405389631327521,-  
1.31355627498985,0.188995571351078,0.645120416922998  
"4515","RPA1",123.498192808264,0.283172861843752,0.215502432067076,1.3  
1401237158945,0.188842040941116,0.645120416922998  
"4516","RPS6KB1",146.801881921676,0.25703357599351,0.195708494773796,1  
.31334910265696,0.189065339712949,0.645120416922998  
"4517","ATP8B1",34.2848218359699,-0.514146934866927,0.391393931580541,  
-1.31363031815716,0.188970640819047,0.645120416922998  
"4518","PAK4",41.0395465911465,0.363364298755019,0.276704772883947,1.3  
1318406606386,0.189120931824523,0.645120416922998  
"4519","MPP1",47.5244662651768,-0.386151781955854,0.294039982004194,-1  
.31326284039273,0.189094395410696,0.645120416922998  
"4520","SEC22C",199.04461420353,-0.22022815297181,0.167798517690032,-1  
.31245589057366,0.189366359571126,0.645296714069699  
"4521","AL391684.1",2.37108257346609,1.39851670073588,1.06558995902836  
,1.31243419561788,0.189373675342153,0.645296714069699  
"4522","SF1",667.627258871529,-0.169904888633022,0.129460246685192,-1.  
31240973954096,0.189381922442512,0.645296714069699  
"4523","AC125494.2",3.63981448369582,-0.994081936384776,0.757204198109  
112,-1.31283204565848,0.189239549168777,0.645296714069699  
"4524","LRP3",74.4089002799232,-0.417126865017539,0.317801695606599,-1  
.31253819845534,0.189338606367696,0.645296714069699  
"4525","ALDH9A1",468.711509879609,0.303467947295382,0.231385295088766,  
1.31152650465089,0.189679945146953,0.645380052601259  
"4526","LAMB3",18.0303411402706,-0.734996817015361,0.560187619560989,-  
1.31205473193315,0.189501668241074,0.645380052601259  
"4527","FAM13B",110.497175509949,0.306019312216911,0.233341285005633,1  
.31146664513107,0.189700155550422,0.645380052601259  
"4528","ADAMTS2",494.394130096645,0.279445025056028,0.213080998660516,  
1.31144976235654,0.189705855977972,0.645380052601259  
"4529","NHLRC1",7.37108010840792,0.804245559869791,0.613427059050363,1  
.31106958521659,0.189834255284134,0.645380052601259  
"4530","TMEM225B",25.4900210441042,-0.592127811284213,0.45158706618940  
9,-1.311215168939,0.189785078934256,0.645380052601259  
"4531","TRPS1",75.5243303118158,0.368942979948738,0.281319084010633,1.



31147512173327,0.189697293494003,0.645380052601259  
"4532","DLG5",87.0080472848653,0.303540888060703,0.231417174780314,1.3  
1166102234571,0.189634533650533,0.645380052601259  
"4533","RPS6KA5",196.04813029141,-0.449970851431063,0.343093160218961,  
-1.31151215939103,0.18968478840058,0.645380052601259  
"4534","PICK1",17.8227360717026,-0.512700356311462,0.391033756527856,-  
1.31114091239573,0.18981016068749,0.645380052601259  
"4535","F8A1",116.623202987894,-0.386082436342115,0.294500698587415,-1  
.31097290496755,0.189866917842797,0.645380052601259  
"4536","AC004889.1",104.385567440996,0.359671838250138,0.2743926452413  
2,1.31079256127225,0.189927856413975,0.645423979265472  
"4537","LSM12",183.892047278103,-0.240747814021309,0.183680650011049,-  
1.31068685790706,0.18996358053373,0.645423979265472  
"4538","ZNF449",29.0964752764092,0.454184289290712,0.346565250922057,1  
.3105303779947,0.190016474476008,0.645461426630159  
"4539","CAMTA1",291.173492043085,-0.298948921333501,0.228177937747665,  
-1.31015699538883,0.190142730528788,0.645464314905061  
"4540","NABP1",618.713484946139,0.79434341747975,0.60641123469668,1.30  
99088078028,0.190226687162743,0.645464314905061  
"4541","ABCF3",78.045142993088,-0.267150390292192,0.203934290557454,-1  
.3099826888452,0.190201691908405,0.645464314905061  
"4542","RSP03",120.346652706647,0.633080844427249,0.483254319706978,1.  
31003659690227,0.190183455392294,0.645464314905061  
"4543","NUTF2",221.769648723355,-0.308785052500784,0.235666197179605,-  
1.31026450206371,0.190106371757265,0.645464314905061  
"4544","ZNF217",200.916323044491,0.238161670709901,0.181835753783627,1  
.30976260583657,0.190276156986108,0.645490088015152  
"4545","SPATA9",3.77486422176342,1.06737116964257,0.815301304791908,1.  
30917387641738,0.190475459094939,0.645967146985603  
"4546","DISP2",3.45021867502719,1.74547202414713,1.3333377696052,1.309  
09966246884,0.190500593590435,0.645967146985603  
"4547","TNFRSF4",2.91981296499042,1.20046908774068,0.917424049835482,1  
.30852149336608,0.190696489311851,0.646489197876001  
"4548","TRAPPC3",259.02173605226,-0.281155768879529,0.215013133714687,  
-1.3076213718768,0.191001764301937,0.646807892428187  
"4549","CCDC17",7.82134673790084,0.778117742680719,0.59528660923304,1.  
30713127191495,0.191168132202583,0.646807892428187  
"4550","GNG5",963.912665007174,-0.310626704808453,0.237624548576089,-1  
.30721639102447,0.191139230269001,0.646807892428187  
"4551","PTRHD1",208.358528641192,-0.364162253536492,0.278488974606769,  
-1.30763616064404,0.190996745807003,0.646807892428187  
"4552","NKTR",559.98409652461,0.365468333765006,0.279562044679339,1.30  
728881377371,0.191114641877772,0.646807892428187  
"4553","HSD17B13",3.04425248051538,1.25765227001833,0.961535380180646,  
1.30796255233172,0.190886011109462,0.646807892428187  
"4554","CXCL16",62.9307998280106,-0.529636651506637,0.405090098357908,  
-1.30745395568442,0.191058582925928,0.646807892428187  
"4555","ZNF549",9.44292975339819,0.665798322229701,0.509255132180926,1  
.3073963916247,0.191078122205272,0.646807892428187  
"4556","UBE2M",432.888004145632,-0.374035760249074,0.286023456784734,-

1.30771008942312,0.190971659897067,0.646807892428187  
"4557","PITPNA",151.404411445094,-0.264141406075717,0.202153662118031,  
-1.30663675991926,0.191336105856976,0.647234161023761  
"4558","DYNC1H1",903.151901507257,0.226265344780211,0.173241839867815,  
1.30606639223442,0.191529980668775,0.647747839405257  
"4559","HRAS",153.055175073378,-0.330940869560244,0.253439198753467,-1  
.3057998572753,0.191620628625797,0.647912259325875  
"4560","PIP5K1A",83.3315680918591,0.267759383183072,0.205215755413831,  
1.30477010716413,0.191971140883293,0.648213029990461  
"4561","MRPL9",201.371625902768,-0.262721236953366,0.201385900461491,-  
1.30456619034064,0.192040607155454,0.648213029990461  
"4562","FDPS",360.330351507537,-0.321552278550148,0.24646372529674,-1.  
30466371131493,0.19200738337034,0.648213029990461  
"4563","TCOF1",69.9467576910303,-0.313438097858245,0.240107809485597,-  
1.30540567809831,0.191754745944323,0.648213029990461  
"4564","AC026979.4",12.7300308886101,0.663316363319206,0.5081839737023  
51,1.30526816594913,0.191801549944764,0.648213029990461  
"4565","CD44",2941.81749956303,-0.328002797420221,0.251315472758806,-1  
.30514366592547,0.191843932350293,0.648213029990461  
"4566","HDAC5",126.936992044736,-0.275567004210832,0.21123523085908,-1  
.30455039668392,0.192045988191141,0.648213029990461  
"4567","AC132938.6",3.70603239259527,-1.00479921122826,0.7700432119118  
3,-1.30486081259464,0.191940247124458,0.648213029990461  
"4568","ZNF280D",303.086931933525,0.23847964348326,0.18284867952287,1.  
30424591583354,0.192149749128249,0.648238354258258  
"4569","N6AMT1",54.3873244148762,0.378715680778322,0.290390905472531,1  
.30415820069181,0.19217964832697,0.648238354258258  
"4570","Z82195.3",3.08916862939232,1.69795172471037,1.30186309711882,1  
.30424752684683,0.192149200018943,0.648238354258258  
"4571","TAF6L",28.6908753491818,-0.485948901461374,0.372660829327132,-  
1.30399779965818,0.192234332595483,0.648280953174222  
"4572","ZNF862",20.2327097933044,0.477279481373768,0.366059992684492,1  
.30382858250543,0.19229203487395,0.648333709007422  
"4573","LNPK",285.379949720971,0.218976823403053,0.167975344975206,1.3  
0362478752686,0.192361544934307,0.648426244295286  
"4574","SLC7A5",4.23881345722997,1.09418056515041,0.839681046536318,1.  
30309070290904,0.192543797279061,0.648898695902213  
"4575","IFT22",217.970468541765,-0.297287195637934,0.228261411840723,-  
1.30239795347177,0.192780381826949,0.649554007838781  
"4576","GLB1L2",2.42124908262361,-1.75028855162728,1.34416686286146,-1  
.3021363641574,0.192869774126565,0.649713192342876  
"4577","HDAC1",42.0029007419218,-0.362734594638787,0.278740829274709,-  
1.30133283876149,0.193144551431952,0.649903453818532  
"4578","NRBP1",380.591086931234,-0.19907891579566,0.152965335751086,-1  
.30146424886494,0.193099594158638,0.649903453818532  
"4579","FARP1",226.261568145571,0.290653150256685,0.2233149419742,1.30  
153919700664,0.193073956771772,0.649903453818532  
"4580","VCPKMT",26.2926669365257,-0.417199685205429,0.32058079535512,-  
1.30138701771976,0.193126015105007,0.649903453818532  
"4581","FGF11",2.38091334141867,1.36044810700955,1.04550810383843,1.30

123152753658,0.193179216697795,0.649903453818532  
"4582","SNRPD1",389.324508836075,-0.363784787534163,0.279512375176096,  
-1.30149796517944,0.193088060565245,0.649903453818532  
"4583","SLC29A1",311.211267980521,-0.392295274684819,0.301538378330819  
, -1.30097958626822,0.193265442271497,0.650051667600945  
"4584","LINC02604",8.99904897270357,0.653911874728894,0.50278416152978  
3,1.30058169044006,0.193401677600418,0.650367988702103  
"4585","EIF3I",779.715295347656,-0.293088964970377,0.225423785268058,-  
1.30016876711504,0.193543132750527,0.650434870360247  
"4586","HLA-C",3157.32930799296,-0.387166052686208,0.297894261915523,-1.2996761004  
9501,0.193712004948789,0.650434870360247  
"4587","ORC3",89.2173075389091,0.267680374563092,0.205913554787231,1.2  
9996480726917,0.193613031304606,0.650434870360247  
"4588","RELA-DT",9.51928257803259,-0.622020350361202,0.478553386802016,-1.299793016  
86259,0.193671919533551,0.650434870360247  
"4589","CRTC1",56.333770045053,0.321502280281192,0.247318253809469,1.2  
9995370470663,0.193616836767185,0.650434870360247  
"4590","TBC1D20",146.446874206383,0.273876098294655,0.210676513718796,  
1.29998400609674,0.193606450933575,0.650434870360247  
"4591","Z83745.1",4.83100373563589,0.997829934983416,0.76776126330026,  
1.2996617342925,0.193716930900026,0.650434870360247  
"4592","TMC04",61.2241171550827,-0.272618777176684,0.209902895311202,-  
1.29878521576608,0.194017649724827,0.650503943536765  
"4593","AK2",178.730478998391,-0.246367236357883,0.189688284611334,-1.  
29880048661246,0.194012407621807,0.650503943536765  
"4594","ANXA4",1105.55813601942,-0.321125132373174,0.247131205160374,-  
1.29941150962616,0.193802743865934,0.650503943536765  
"4595","SCN7A",3.15972519121397,3.19375409745261,2.45911586674862,1.29  
874079568089,0.194032898630039,0.650503943536765  
"4596","NCBP2",217.814842856415,-0.2295205059049,0.176664427226592,-1.  
29918914355359,0.193879026322043,0.650503943536765  
"4597","DAP",220.726440848105,-0.273862693299213,0.210829031955181,-1.  
29897998752578,0.193950797201297,0.650503943536765  
"4598","KDELR3",345.420041735847,-0.378465626941289,0.291296865585106,  
-1.2992437326131,0.19386029755927,0.650503943536765  
"4599","TEAD3",57.0494838652107,0.393645113119838,0.303160155236866,1.  
29847246189814,0.194125033246026,0.650671317131439  
"4600","AC072022.2",28.4971540808402,0.591357871355721,0.4555554349645  
49,1.29810298806278,0.194251947674751,0.6509551681318  
"4601","ATP6V0B",438.916966084742,-0.312701013247415,0.240937846991268  
, -1.29784928832185,0.194339128905756,0.650978884928571  
"4602","AC074117.1",7.95314124145863,0.790479108719916,0.6091897685200  
89,1.29759091430612,0.194427945910551,0.650978884928571  
"4603","LRWD1",31.5600745317687,-0.493545453446342,0.380300676327284,-  
1.29777695431075,0.194363990982829,0.650978884928571  
"4604","HTATIP2",145.704695631375,0.508771558663078,0.392054425564713,  
1.29770645473584,0.194388224787894,0.650978884928571  
"4605","AC004263.2",3.71357826936207,1.3688690218165,1.05536733300491,

1.29705456953928,0.194612411452808,0.651455010324654  
"4606","SRP72",524.263778004783,-0.196548115800041,0.151575891954995,-  
1.29669773514114,0.194735208942972,0.65159673821667  
"4607","DOP1A",55.0674593341555,0.308467653213309,0.23818220466995,1.2  
9509109902125,0.195288805096401,0.65159673821667  
"4608","HOXA7",82.0683690148298,0.503134620870398,0.388267874888704,1.  
29584406388146,0.195029213634094,0.65159673821667  
"4609","SMIM30",196.451998033212,0.33418256239779,0.257855398863664,1.  
29600762237475,0.194972858833114,0.65159673821667  
"4610","FAM160B2",74.265454171396,0.294166085543372,0.227098078412996,  
1.29532617624535,0.195207732904581,0.65159673821667  
"4611","CYC1",376.704357960441,-0.339550690519507,0.262177388669803,-1.  
.29511813449004,0.195279479990461,0.65159673821667  
"4612","DNLZ",19.8711853792884,-0.616222479659967,0.475787108044542,-1.  
.29516430613811,0.19526355516584,0.65159673821667  
"4613","PLAU",382.835931400932,0.457648868698596,0.353033264028142,1.2  
9633356210342,0.19486059047823,0.65159673821667  
"4614","RCBTB1",29.3962158238015,0.375645793819626,0.28977744705857,1.  
29632515446828,0.194863485851336,0.65159673821667  
"4615","YLPM1",146.866396473274,0.304186902693988,0.234589352383659,1.  
29667821494518,0.194741928071181,0.65159673821667  
"4616","SMG1",257.619200515005,0.305959707612491,0.236035427823571,1.2  
9624484948584,0.19489114241023,0.65159673821667  
"4617","MTHFSD",31.0477221424878,0.381908117752727,0.294723370535013,1.  
.29581891337442,0.195037880411968,0.65159673821667  
"4618","PSMB6",755.980026679272,-0.365469856266738,0.281990003315428,-  
1.29603834167813,0.194962275693905,0.65159673821667  
"4619","PRCD",35.7007015297086,-0.494763862912811,0.382015891542688,-1.  
.2951394794463,0.195272117893504,0.65159673821667  
"4620","BEX5",6.18310628793004,-1.26126239035013,0.973803192172054,-1.  
29519229397564,0.195253902488948,0.65159673821667  
"4621","HERC3",86.673477446847,-0.30932559057685,0.238920461262161,-1.  
29468020002454,0.195430573060244,0.651646611231593  
"4622","LINC00683",5.78770097569766,1.04157090373228,0.804432141607397,  
1.29479026242168,0.195392592044854,0.651646611231593  
"4623","PITPNB",294.584904747562,-0.216384701040247,0.167105837680846,  
-1.29489612118469,0.195356066751717,0.651646611231593  
"4624","STARD7",129.096715690342,0.274139243118875,0.211838302358535,1.  
.29409667688375,0.195632029273066,0.651754426463002  
"4625","PAX8",6.39888856218437,-1.04322307519268,0.80592834879767,-1.2  
9443650511738,0.195514688071782,0.651754426463002  
"4626","ZNF655",232.981479552622,0.284979900716403,0.220199440394152,1.  
.29418994074778,0.195599820530654,0.651754426463002  
"4627","GON7",70.6921971514604,-0.368243280724552,0.284549835208316,-1.  
.29412579155059,0.195621974084601,0.651754426463002  
"4628","IL27RA",6.26114253471912,-1.07705414126783,0.832413164770372,-  
1.29389368987809,0.195702144419992,0.651847138339277  
"4629","TDRD6",10.0385165672298,0.641360404336991,0.495773516712652,1.  
29365603993874,0.195784256134839,0.651903775451086  
"4630","TMEM176A",1387.37336098917,0.407859677235328,0.315345149030221

,1.29337546015728,0.195881233273047,0.651903775451086  
"4631","IRF9",315.069738201824,-0.363659518740085,0.281155362184499,-1  
.29344685413272,0.195856553946163,0.651903775451086  
"4632","BX537318.1",9.78538834662518,0.686788387188202,0.5310130565616  
89,1.29335499137283,0.195888309301942,0.651903775451086  
"4633","TBX18",95.8607114268562,0.266881561664568,0.206392081810423,1.  
2930804288786,0.195983243265296,0.652078932642895  
"4634","ZBTB42",6.97047215845107,-0.752600896310543,0.582129112752404,  
-1.29284187961691,0.196065752499159,0.652212683378192  
"4635","SLC30A7",167.382694909762,0.283685442231653,0.21949679225375,1  
.2924354808051,0.196206376018778,0.652258202788325  
"4636","GLIPR2",539.454506735318,-0.267145689745645,0.206689163584518,  
-1.29249973783171,0.196184136663754,0.652258202788325  
"4637","DOK4",41.1754524515339,-0.350799694886562,0.271402766781262,-1  
.29254281025547,0.196169230333115,0.652258202788325  
"4638","LINC01266",5.09610875893552,0.908063168638364,0.70297593361347  
1,1.2917414739516,0.196446689484891,0.652775537488597  
"4639","DBN1",1121.94501875945,-0.265583315330756,0.205590467184772,-1  
.29180753839168,0.196423804097751,0.652775537488597  
"4640","SH2D1A",5.33767809539444,1.01587604378602,0.78659845000029,1.2  
9147984436741,0.196537339790132,0.652936011393294  
"4641","EXOSC8",194.669128594942,-0.307354236791234,0.238028452651248,  
-1.29124998867913,0.19661700624819,0.653032855342148  
"4642","CANT1",92.9761306562682,0.247094402225938,0.191375249083299,1.  
29115130305271,0.196651217288242,0.653032855342148  
"4643","AC005089.1",3.30643883826531,1.30865566323517,1.013826735678,1  
.29080800217802,0.196770262299475,0.653146768593111  
"4644","BCL2A1",29.5439764715918,-1.28574537740959,0.995986607858355,-  
1.29092637116306,0.196729210021034,0.653146768593111  
"4645","STARD4",6.13568443240288,-0.970896746718212,0.75236193191441,-  
1.29046500830755,0.196889253546137,0.653232085869735  
"4646","RAPGEF1",145.00974004281,0.316965885279982,0.245608147968467,1  
.29053489430927,0.196865004459479,0.653232085869735  
"4647","AC005291.1",2.66177148683847,-1.9876640391198,1.54038601902511  
, -1.29036748877905,0.196923094585576,0.653232085869735  
"4648","FAM72B",5.09662803639272,1.09925407724404,0.852431742885266,1.  
28955084840382,0.197206650734081,0.653437618457051  
"4649","AZI2",390.333173030839,0.220219237988602,0.170819275726542,1.2  
8919430814788,0.197330543324189,0.653437618457051  
"4650","PEX6",44.7290241627657,-0.411439248476508,0.319112166861125,-1  
.28932485565667,0.197285173340888,0.653437618457051  
"4651","CASTOR3",27.3834175659359,0.49149357164017,0.381172832956909,1  
.28942445301639,0.197250564789435,0.653437618457051  
"4652","CCDC7",37.1150747034742,0.409049290665843,0.317222792757364,1.  
28947005071831,0.197234721772068,0.653437618457051  
"4653","CALHM2",624.863643974531,-0.214405665952134,0.166303500380106,  
-1.28924325382259,0.197313532036279,0.653437618457051  
"4654","PTGES3",1141.66288323345,-0.27668021135705,0.214632077311502,-  
1.28909068403366,0.197366561890109,0.653437618457051  
"4655","MEGF8",62.3374059493208,0.364466623085993,0.28265066602419,1.2

8945962948766,0.197238342568442,0.653437618457051  
"4656","SHOX",4.81168033180741,1.56714026892889,1.21478140221934,1.290  
05948400741,0.197030005777193,0.653437618457051  
"4657","POU2F1",143.447407762415,0.323861040230435,0.251321959940854,1  
.28863009148366,0.197526716861289,0.653827429765251  
"4658","WASF3-  
AS1",4.79293257662982,1.19507212068031,0.92780145622397,1.288068813282  
64,0.197722010288969,0.653843685548472  
"4659","ISLR",2579.72246644364,0.254813825824255,0.197897724430652,1.2  
8760361725911,0.197883979533292,0.653843685548472  
"4660","DDX28",14.0421299488198,-0.578989987548012,0.449573438895771,-  
1.28786520166785,0.197792890655148,0.653843685548472  
"4661","CDYL2",9.19086494224698,0.660124409234981,0.512405244643612,1.  
2882858170082,0.197646488381986,0.653843685548472  
"4662","MEX3C",87.8879633626289,0.34043219543854,0.264409407120582,1.2  
8751922689078,0.197913372479349,0.653843685548472  
"4663","ADNP2",86.8598437590008,0.365010446360812,0.283398246467196,1.  
28797708140746,0.197753941279009,0.653843685548472  
"4664","AP3D1",178.201137033631,0.258344544672916,0.20060629782642,1.2  
8781871492617,0.19780907601854,0.653843685548472  
"4665","FBX046",22.7941992024147,0.413689621845844,0.321296839751857,1  
.28756206306089,0.197898452353453,0.653843685548472  
"4666","CBFA2T2",92.1749496860159,0.359606708948533,0.279162876868058,  
1.28816092233673,0.197689951802496,0.653843685548472  
"4667","AQP5",3.64246283474977,-1.29760055254615,1.00794588463473,-1.2  
8737124911858,0.197964920463354,0.653873848069981  
"4668","FADS2",18.636637280775,0.929988704413354,0.722562768966837,1.2  
8706978044704,0.198069967311673,0.654080665404765  
"4669","AC103691.1",4.92972587572578,0.900204918662399,0.6996015919195  
36,1.28673938004123,0.198185142255248,0.654320832697505  
"4670","HPSE",17.2306840448801,0.573626134325493,0.445844991354968,1.2  
8660441509545,0.198232204046499,0.654336065391172  
"4671","NAGLU",336.202588683754,0.355311158696545,0.276195072087293,1.  
28645002972481,0.198286047691536,0.654373672696431  
"4672","KAT2B",86.2858489520893,0.3705564883023,0.288175515771063,1.28  
587082532259,0.198488147115752,0.654393919325752  
"4673","FAM120A0S",288.070513471981,-0.204777162857584,0.1592838270269  
68,-1.2856117703834,0.198578586828052,0.654393919325752  
"4674","ZNF239",10.1455081602732,-0.771758399240562,0.600116284995519,  
-1.28601475836691,0.198437911088811,0.654393919325752  
"4675","ATXN2",255.775760110785,0.248579317585936,0.193267446386083,1.  
28619341867517,0.198375567361123,0.654393919325752  
"4676","RUVBL2",135.494944281358,-0.351180681759162,0.273085331187238,  
-1.28597416870546,0.198452076896583,0.654393919325752  
"4677","C22orf39",165.8721517803,-0.253967639782788,0.197527571470308,  
-1.2857326088321,0.198536396682462,0.654393919325752  
"4678","NUP50-  
DT",11.5764035081758,-0.61164503631191,0.475773253679423,-1.2855809602  
1942,0.198589345092823,0.654393919325752  
"4679","AL450384.2",6.45878403135044,0.910352056836859,0.7082681200950

07,1.28532123783115,0.198680051655316,0.654552895120047  
"4680","CCL19",5.27746717305317,-1.53110899611372,1.19157318422277,-1.  
28494751005362,0.198810627094325,0.654582438068418  
"4681","EDF1",1933.96485612184,-0.343485742989322,0.267416819514832,-1.  
.28445826112396,0.198981658862881,0.654582438068418  
"4682","BNIP2",306.250829661754,0.205101473058059,0.159680949681857,1.  
28444547371929,0.198986130528784,0.654582438068418  
"4683","KIF7",41.3962888638355,-0.442239895887358,0.344304245869571,-1.  
.28444508365106,0.198986266934065,0.654582438068418  
"4684","SRRM2-  
AS1",3.25827920179762,1.06363906753755,0.827742168459581,1.28498837931  
257,0.198796344872947,0.654582438068418  
"4685","GSDMB",3.77576300241495,1.19845036105827,0.932807922821179,1.2  
8477721054693,0.198870148243436,0.654582438068418  
"4686","PROCR",1499.29135122788,0.46963280320028,0.3656201643869,1.284  
48277459695,0.198973086878323,0.654582438068418  
"4687","STX12",326.126447431734,0.250099750491386,0.195021983842628,1.  
28241824620758,0.199695966892157,0.654658156664985  
"4688","TMEM127",126.033652350636,0.263019810616492,0.205114112866638,  
1.28230967114147,0.199734036709551,0.654658156664985  
"4689","SLC22A4",24.8174766575154,0.487336810565026,0.380070356869492,  
1.2822278869077,0.199762716322509,0.654658156664985  
"4690","HDAC3",162.347647005144,-0.318914653040706,0.248481708382062,-  
1.28345323733185,0.199333332643265,0.654658156664985  
"4691","FAM193B",54.0634024194203,0.366947059540518,0.286070023287442,  
1.28271762040517,0.199591024381165,0.654658156664985  
"4692","ECI2",420.700332939771,-0.272438008596282,0.212449741333752,-1.  
.28236451071169,0.199714807576839,0.654658156664985  
"4693","PDCD2",254.317238443222,-0.279988732293583,0.218366477390391,-  
1.28219649664003,0.199773724875257,0.654658156664985  
"4694","RGP1",43.0679619711154,0.385829604998722,0.300547217910856,1.2  
8375703385537,0.199226981560308,0.654658156664985  
"4695","SLC35D2",122.310910953751,-0.271888291792797,0.211937094268615  
, -1.28287260298189,0.19953671267966,0.654658156664985  
"4696","FBH1",199.976357399536,-0.214213305035801,0.166887178076942,-1.  
.28358156392961,0.199288403855232,0.654658156664985  
"4697","FAM53B",47.363061544201,0.405666629384217,0.3161144432343,1.28  
329039709059,0.199390355754314,0.654658156664985  
"4698","AP001107.2",3.0544607874672,1.25086971476121,0.975249779497726  
, 1.28261471169513,0.199627093414174,0.654658156664985  
"4699","WBP11",249.368995121808,-0.185673839857591,0.144749393820019,-  
1.28272619979644,0.199588017558702,0.654658156664985  
"4700","ZC3H10",25.8397812535417,-0.413888044403881,0.322339579022698,  
-1.28401248664141,0.199137586429769,0.654658156664985  
"4701","PPAN",56.4425124810303,-0.407013418474268,0.317295408773249,-1.  
.28275861301585,0.199576657984245,0.654658156664985  
"4702","ZNF420",53.5110196523355,0.290332859706557,0.226154717673775,1.  
.28377980655419,0.199219011114973,0.654658156664985  
"4703","ZNF224",100.997212061427,0.269811994631291,0.210215568960437,1.  
.28350148357503,0.199316440146528,0.654658156664985

"4704", "DUSP15", 2.87250986087811, 1.36964177780707, 1.06650937443839, 1.28422854091489, 0.199062001604137, 0.654658156664985  
"4705", "ALG3", 125.213422977027, -0.342303186356888, 0.267139014886899, -1.28136725555349, 0.20006469983247, 0.654915554877367  
"4706", "TMEM179B", 547.326878440533, -0.292757639797523, 0.2284340915729, -1.28158471348002, 0.19998836543238, 0.654915554877367  
"4707", "MPHOSPH9", 33.8439401937512, 0.363915221338169, 0.283968797966461, 1.28153242167525, 0.200006719516702, 0.654915554877367  
"4708", "SMAD9-  
IT1", 4.25644304692833, 1.19636275069219, 0.933358900688694, 1.28178212026417, 0.19991908801734, 0.654915554877367  
"4709", "CIC", 102.824801381209, -0.249711716901326, 0.194874682866303, -1.28139639910354, 0.200054468318373, 0.654915554877367  
"4710", "LRIG2-  
DT", 12.7941056170104, 0.555790521644241, 0.433956480091889, 1.28075175078974, 0.200280876205731, 0.654920313989142  
"4711", "SLC25A46", 132.850987714747, 0.21284536741832, 0.166202684014908, 1.28063736563501, 0.200321069118314, 0.654920313989142  
"4712", "CEP170B", 36.6754987428663, -0.354924140254779, 0.27710156470387, -1.28084495168432, 0.200248131419201, 0.654920313989142  
"4713", "CCNDBP1", 417.186148199646, -0.26930479232118, 0.210266566252467, -1.28077800061578, 0.200271653313532, 0.654920313989142  
"4714", "AC005899.6", 11.7851622605841, 0.693027611760903, 0.540910828249225, 1.2812234023934, 0.200115208393415, 0.654920313989142  
"4715", "CD99", 5140.91883636223, -0.305132714100909, 0.238183715332356, -1.28108134376497, 0.200165096009385, 0.654920313989142  
"4716", "ANAPC5", 443.339002222786, -0.174953829689353, 0.136650919755105, -1.28029749088327, 0.200440529813361, 0.655171918378489  
"4717", "FAF1", 118.176432627387, -0.284514379728383, 0.222384007411123, -1.27938327508596, 0.200762120511211, 0.65599901359016  
"4718", "LRPPRC", 177.708339499138, 0.240410660706602, 0.187923562543441, 1.27930025087209, 0.200791344306158, 0.65599901359016  
"4719", "GAS2", 3.84091626008136, -0.947763864918462, 0.740894699650302, -1.27921533973154, 0.200821235493478, 0.65599901359016  
"4720", "FRK", 16.0115908759036, -0.530746134696136, 0.414998933284578, -1.27890963597294, 0.20092887898365, 0.656072584099337  
"4721", "MAGEL2", 3.06963825877166, 1.58006728057955, 1.23547652173436, 1.27891323937217, 0.200927609920381, 0.656072584099337  
"4722", "C20orf96", 42.9384252130762, -0.386576038265132, 0.302334170001797, -1.2786382639542, 0.2010244689523, 0.656245698623402  
"4723", "CAPN7", 128.802080840215, 0.240890583902261, 0.18841643245338, 1.27850092885006, 0.201072857467498, 0.656264683011113  
"4724", "SLC33A1", 111.103469924936, 0.269923693082528, 0.211159537211591, 1.27829269114211, 0.201146243945882, 0.656365230826792  
"4725", "ACOXL-  
AS1", 2.42257427019444, 1.2836103013787, 1.0043134876016, 1.27809724475978, 0.201215140319421, 0.656451087412461  
"4726", "ADAM17", 194.270586496873, -0.347118075888099, 0.271660501979102, -1.27776424382372, 0.201332565392899, 0.656695195838243  
"4727", "ILKAP", 107.561447082242, -0.262597089159863, 0.205597238056171, -



1.27724035421195,0.20151740409979,0.657020047419261  
"4728","EIF4E",195.017017804148,-0.268628983512565,0.210310261767562,-  
1.27729850771361,0.201496880280204,0.657020047419261  
"4729","ZBTB18",11.4635467641227,0.609679207300663,0.477758474408574,1  
.27612431795249,0.201911576516478,0.657331985639179  
"4730","MVP",431.313748628205,-0.197723067596248,0.154876741938643,-1.  
2766479015589,0.201726582287826,0.657331985639179  
"4731","SP2",59.9695010737999,0.289998922590629,0.227242078106654,1.27  
616735864614,0.201896364577489,0.657331985639179  
"4732","FBX027",14.9483176635265,0.632909762937458,0.495912464790324,1  
.27625298389113,0.201866104399065,0.657331985639179  
"4733","NAA20",284.550579663283,-0.307359508031972,0.240851743622722,-  
1.27613569828844,0.201907554265469,0.657331985639179  
"4734","AP001442.1",3.68131078541976,1.11304792506902,0.87210675056970  
7,1.27627486467903,0.201858372203671,0.657331985639179  
"4735","LINC00630",18.6937461777525,0.602396748000984,0.47189745561634  
1,1.27654163172844,0.201764119883366,0.657331985639179  
"4736","CNNM3",80.1203319799864,0.344902991451188,0.270421150615554,1.  
27542905081977,0.202157421630813,0.657498690209128  
"4737","CCDC14",167.791323752621,0.26623076561033,0.208773894209134,1.  
27521099617771,0.202234570255369,0.657498690209128  
"4738","AL021368.2",51.5893868039827,0.453799102131753,0.3558830975340  
89,1.27513530503731,0.202261355106824,0.657498690209128  
"4739","UAP1L1",36.829863884806,0.437577911455579,0.343095712749912,1.  
27538146119167,0.20217425720577,0.657498690209128  
"4740","STXBP4",62.124540958401,0.352174240114527,0.276048722542129,1.  
27576841099411,0.202037397286227,0.657498690209128  
"4741","KIAA1328",96.3994733359858,0.253408400228618,0.198726275353393  
,1.27516303406776,0.202251542324641,0.657498690209128  
"4742","KCNK15",17.8002677407358,-0.581126299215512,0.455657211381395,  
-1.27535850349814,0.202182379214156,0.657498690209128  
"4743","AC084018.2",2.65688751802067,-1.28698009127554,1.0094603267539  
4,-1.27491894150412,0.202337934006914,0.65760895060438  
"4744","AC034236.2",12.7294497126277,0.687475509496241,0.5392983301008  
73,1.27475920306976,0.202394484787738,0.65765408579321  
"4745","ST6GALNAC6",350.364600478748,-0.230833578883401,0.181142826988  
417,-1.27431807663111,0.202550712685377,0.657773101866237  
"4746","CALM1",3622.34882606535,-0.230023607600484,0.180527501309257,-  
1.27417488156797,0.202601445066202,0.657773101866237  
"4747","AC145343.1",3.50581091066295,1.06011532771151,0.83208071940770  
2,1.27405346979573,0.202644467127003,0.657773101866237  
"4748","ZNF582-  
AS1",18.2776096718565,0.606001640977913,0.475623249279304,1.2741211492  
419,0.202620484206206,0.657773101866237  
"4749","TSPYL2",118.556313238052,0.442099035772555,0.346991485105421,1  
.27409188625548,0.202630853598244,0.657773101866237  
"4750","AC004148.1",49.044533871468,-0.492790218689748,0.3868655786492  
25,-1.27380218320371,0.202733531258075,0.657785178771463  
"4751","MAST3",14.5342113233533,0.585682144125993,0.459757652375904,1.  
27389319372792,0.202701270878736,0.657785178771463

"4752", "AC109630.1", 2.78227427858222, -1.13897489217715, 0.8946693144984  
16, -1.27306801934489, 0.202993906135114, 0.658491385326764  
"4753", "AUXG01000058.1", 117.46881541203, 1.03502546234231, 0.81321771038  
4662, 1.2727532235528, 0.203105624608275, 0.658527661793236  
"4754", "MYBBP1A", 32.2114766322228, -0.376788979531482, 0.29603462735092,  
-1.27278684559032, 0.203093690284522, 0.658527661793236  
"4755", "PTGIR", 26.8311429385833, -0.855771615593689, 0.672419387258712, -  
1.27267540438187, 0.203133248902163, 0.658527661793236  
"4756", "KRT24", 18.3749377222286, 0.777315046619711, 0.610874383799518, 1.  
27246299277597, 0.203208664822328, 0.658633635037047  
"4757", "ZYG11B", 235.003488072428, 0.275348874522967, 0.216779112386751, 1  
.27018176009376, 0.204019893281082, 0.658707565962923  
"4758", "HDAC4-  
AS1", 17.7733685868998, -0.461089695889341, 0.36248951054322, -1.272008382  
25183, 0.203370141043075, 0.658707565962923  
"4759", "MUSTN1", 122.4078656562, -0.595361684272901, 0.468613388720773, -1  
.27047519042964, 0.203915414741585, 0.658707565962923  
"4760", "FILIP1L", 1589.12403149818, -0.317688889940566, 0.249810811345905  
, -1.27171793818272, 0.203473354756367, 0.658707565962923  
"4761", "ATP2C1", 164.793442305219, 0.249068675482679, 0.196134325221039, 1  
.26988825235962, 0.204124438341786, 0.658707565962923  
"4762", "RAET1G", 8.31248740008247, 0.887000232197512, 0.697433995612879, 1  
.27180527157706, 0.203442315498957, 0.658707565962923  
"4763", "ZNF3", 63.2810471045106, 0.337706789028829, 0.265722717695677, 1.2  
7089919882422, 0.20376451148717, 0.658707565962923  
"4764", "LERFS", 21.1950315619023, 2.05203383055517, 1.61380142499105, 1.27  
155286813962, 0.203532031897722, 0.658707565962923  
"4765", "C9orf116", 20.8721009213571, -0.526493419318001, 0.41446679137120  
1, -1.27029096245848, 0.203981006236191, 0.658707565962923  
"4766", "LINC02664", 4.99581079848671, 0.901905534271, 0.710107534177158, 1  
.27009712031304, 0.204050037281919, 0.658707565962923  
"4767", "AC022387.2", 4.70692491200438, -0.857556649672344, 0.674440928808  
335, -1.27150742643623, 0.203548187137636, 0.658707565962923  
"4768", "KDM2A", 217.573043268423, 0.315484861741892, 0.248460483173282, 1.  
26975870654597, 0.204170593900626, 0.658707565962923  
"4769", "ZCRB1", 554.512254132692, -0.25257175711985, 0.198531252451279, -1  
.27220149977059, 0.203301534900893, 0.658707565962923  
"4770", "LIN52", 32.4441388890585, 0.379276887124905, 0.29848568905424, 1.2  
7067025667681, 0.203845981179416, 0.658707565962923  
"4771", "RPP25", 68.4318724691804, -0.41744477990079, 0.328383906923157, -1  
.27120961502682, 0.203654086881859, 0.658707565962923  
"4772", "MCRIP2", 50.0027336622647, -0.394056267543232, 0.309760551805102,  
-1.27213186200407, 0.203326272186845, 0.658707565962923  
"4773", "LINC02175", 13.6313897951239, 0.621385541998427, 0.4892678303279,  
1.27003147045654, 0.204073420355399, 0.658707565962923  
"4774", "AXL", 1061.97012461478, -0.220689030277987, 0.1737953202685, -1.26  
982147699397, 0.204148228624157, 0.658707565962923  
"4775", "EMC10", 232.018556998069, 0.213634909118854, 0.168183035639958, 1.  
27025242650631, 0.203994728302091, 0.658707565962923  
"4776", "Z82217.1", 16.4473325222565, -0.699539919105546, 0.55083280638476

6,-1.26996778513752,0.204096105565746,0.658707565962923  
"4777","PUDP",30.8051055677527,0.379062799364594,0.298527241958661,1.2  
6977624178461,0.204164345869332,0.658707565962923  
"4778","RPL36A",5292.77892839205,-0.313142295396223,0.246616124230902,  
-1.26975596738774,0.204171569910532,0.658707565962923  
"4779","PAXIP1-  
AS1",66.7375238458334,-0.295070071307616,0.232431087657912,-1.26949486  
095378,0.204264622277475,0.658869879139417  
"4780","AC254633.1",15.9774754280778,-0.660533096933096,0.520660273676  
988,-1.26864508457368,0.204567676760248,0.65926387754896  
"4781","UBE2E2",235.180022440115,-0.279993626864442,0.220781497916732,  
-1.26819334729779,0.204728912217118,0.65926387754896  
"4782","TMEM181",115.605732313111,0.290468852238445,0.229039859090491,  
1.26820219586183,0.204725753073311,0.65926387754896  
"4783","CTBP2",247.901679007529,0.278746944323071,0.219695244294414,1.  
26878915935714,0.204516272576015,0.65926387754896  
"4784","AAGAB",47.1724180993786,-0.343162478504313,0.270579238621602,-  
1.26825132723585,0.204708212671396,0.65926387754896  
"4785","AC027237.3",4.03411532581985,1.01465384390872,0.79984495369542  
,1.26856316242398,0.20459690980792,0.65926387754896  
"4786","AC093525.7",4.62134395786284,1.00784430574321,0.79465123316401  
2,1.26828508367166,0.204696161912743,0.65926387754896  
"4787","CCDC102A",101.495903866923,-0.273007231966367,0.21527058746164  
2,-1.26820498418073,0.204724757585757,0.65926387754896  
"4788","KATNB1",40.5317193192084,-0.335668694725622,0.264737887613467,  
-1.26792843197313,0.204823509588079,0.659430743588188  
"4789","HERC5",28.1910511056424,0.4641268156991,0.366124728475515,1.26  
767404548622,0.204914377176185,0.659447833856136  
"4790","ABCC9",305.835990586502,0.391158414441246,0.308545138856589,1.  
26775101980478,0.204886878634991,0.659447833856136  
"4791","AKAP9",868.162331055564,0.26813499386697,0.211616935463324,1.2  
6707719909044,0.205127687486008,0.659996514839662  
"4792","CDKN1B",215.465874007154,0.267655940709259,0.211279995279137,1.  
.26683049360939,0.205215906089545,0.660142569359421  
"4793","CDKN2B",40.5214733979117,0.576929372181774,0.455472401006054,1.  
.26666153845424,0.205276338118139,0.660199197181537  
"4794","DLGAP1",3.26241437769975,1.14261376428817,0.902248425547081,1.  
26640704703401,0.205367389247949,0.660348164322403  
"4795","AP001469.3",2.37472831985076,1.4915674528558,1.17790107216485,  
1.26629263535219,0.205408332658185,0.660348164322403  
"4796","FBXL15",165.26289826823,-0.301055637771368,0.237840009369483,-  
1.26579055630493,0.205588077008345,0.660788199975737  
"4797","CCT4",479.37591284521,-0.237637102856413,0.187772482459377,-1.  
26555872161845,0.205671112411611,0.660917281180944  
"4798","AC010896.1",7.93549784713681,0.875248769549235,0.6916577068970  
23,1.26543630009684,0.20571496952197,0.660920436678026  
"4799","CKAP4",428.46714501855,0.291177335055357,0.230140619353319,1.2  
6521487546852,0.205794311431316,0.660959583934626  
"4800","BMF",19.3642386217611,0.530137720511064,0.419027215025759,1.26  
516298106908,0.205812909690964,0.660959583934626

"4801", "PUF60", 310.244563839266, -0.3046168567976, 0.240883068392968, -1.26458392791916, 0.206020517444122, 0.661374344123181  
"4802", "DUSP6", 110.993233082635, -0.40354676417437, 0.319119432276776, -1.26456343098646, 0.206027868989913, 0.661374344123181  
"4803", "CA12", 247.877733641376, -0.461370951679803, 0.364904657500003, -1.264360271093, 0.206100745770915, 0.661470538425702  
"4804", "PCGF1", 62.1797655530225, -0.261121269611963, 0.206638140879085, -1.26366443533171, 0.206350495342515, 0.661858694487071  
"4805", "CD2AP", 111.444820566864, 0.26548859631216, 0.210081992849415, 1.26373799444325, 0.206324083101201, 0.661858694487071  
"4806", "SFXN3", 221.802952525965, -0.269009162790414, 0.212871569600128, -1.26371578551207, 0.206332057213517, 0.661858694487071  
"4807", "ZNF691", 20.2750368832498, 0.487426212739136, 0.385863028312619, 1.26321045804946, 0.206513555422101, 0.661946804578585  
"4808", "MICA", 117.780679458883, -0.353743575631093, 0.280084164101335, -1.26299027567695, 0.20659267446173, 0.661946804578585  
"4809", "PDE3A", 31.5128776870666, 0.547572125113228, 0.433449739848964, 1.26328862327621, 0.206485473281053, 0.661946804578585  
"4810", "SLC38A1", 24.5594563449039, -0.593356961183699, 0.469765829081543, -1.26309093691168, 0.20655650071495, 0.661946804578585  
"4811", "HIC2", 61.0355720242838, 0.4474296356817, 0.35414566381859, 1.26340565872605, 0.206443431558161, 0.661946804578585  
"4812", "DUSP23", 112.282813039055, -0.367811662704982, 0.291345594860867, -1.26245829418025, 0.206783924381382, 0.662284270587783  
"4813", "NDUFS1", 283.523664605483, 0.198373963929415, 0.157131737230947, 1.262469106657, 0.206780035964625, 0.662284270587783  
"4814", "ADGRL2", 90.9056608759257, 0.338508888488783, 0.268243554935802, 1.26194602725794, 0.206968208249155, 0.662578116797664  
"4815", "CAST", 2067.35300861996, -0.265044689046455, 0.210065266409952, -1.26172543217691, 0.207047602245498, 0.662578116797664  
"4816", "PRKAR1B", 7.30386927613406, -0.718347323123759, 0.569308912578626, -1.26178829674399, 0.207024974515651, 0.662578116797664  
"4817", "PNKP", 90.3920272653222, -0.312172239710353, 0.247391775778462, -1.26185374888897, 0.207001417309549, 0.662578116797664  
"4818", "ANTXR1", 684.938040107722, 0.301826230692266, 0.239247566310901, 1.2615644762716, 0.20710554555442, 0.662625982715107  
"4819", "SYAP1", 370.285316790232, -0.193959752583407, 0.153812580883457, -1.26101357554341, 0.207303956086334, 0.663123154818603  
"4820", "TTLL3", 210.731799322222, 0.300773327634873, 0.238665953124337, 1.26022720751535, 0.207587410606808, 0.66389210259418  
"4821", "CERS2", 441.171427147816, -0.264721657522805, 0.210149273678822, -1.25968390415371, 0.207783414102498, 0.664105604061788  
"4822", "VPS54", 71.6240531374401, 0.262174178155858, 0.208112981871588, 1.2597684959299, 0.207752887740083, 0.664105604061788  
"4823", "NDUFA5", 529.837332120655, -0.286557556854342, 0.227464792652225, -1.25978861833121, 0.207745626712725, 0.664105604061788  
"4824", "CTDSP1", 435.637500424527, -0.204456791831394, 0.162400367029429, -1.25896754774171, 0.20804205376877, 0.664106079694676  
"4825", "SEPTIN2", 1055.4283874773, 0.219541015803558, 0.174367171481867, 1.259073103829, 0.208003928205772, 0.664106079694676

"4826","AC097376.3",58.813861471819,0.324290899268019,0.25748212092366,1.25946958221681,0.207860770333145,0.664106079694676  
"4827","TMEM250",109.091756092862,-0.263103926711748,0.208933596474375,-1.25927055845237,0.20793262362292,0.664106079694676  
"4828","SOS2",149.64902607091,0.271486695851453,0.21560412986683,1.25919061021298,0.207961492301835,0.664106079694676  
"4829","KRT10",1385.91287165737,-0.325847093764522,0.258768563322045,-1.25922210017063,0.207950121179478,0.664106079694676  
"4830","TIAL1",341.764337743678,-0.168097015704999,0.133552747511407,-1.25865636489913,0.208154478679286,0.664327388994036  
"4831","CCDC152",76.0106051040898,0.439184653541049,0.349276797162975,1.2574114773966,0.208604675315643,0.664925723421579  
"4832","JAZF1",262.336494269607,0.230952365314136,0.183612141847794,1.25782730373891,0.208454218950054,0.664925723421579  
"4833","SBDS",795.672923574503,-0.228575147906703,0.181774849550518,-1.25746300146533,0.208586028348852,0.664925723421579  
"4834","SMNDC1",149.699217081096,-0.222944524910947,0.177255289956599,-1.25775950024134,0.208478746581754,0.664925723421579  
"4835","TLN2",280.653139765972,0.316681742220114,0.251873825141663,1.25730310421101,0.208643900369132,0.664925723421579  
"4836","ZNF682",17.7425330683771,0.483733870400399,0.384707687310722,1.25740630186497,0.208606548448126,0.664925723421579  
"4837","ZNF254",113.215621403352,0.266283294340652,0.211788240436874,1.25730915839032,0.208641708952669,0.664925723421579  
"4838","TRIM35",35.0885901715338,-0.375154836828697,0.298442843533561,-1.25704082023502,0.208738854673796,0.665082324270319  
"4839","C12orf57",1943.65282159133,-0.334566201439198,0.266177476385384,-1.25692904592272,0.20877932968823,0.665082324270319  
"4840","IER5",383.426280093438,0.282226478520014,0.224661871066447,1.25622775765337,0.20903340558986,0.665174710718392  
"4841","FN1",5208.945882213,-0.281980842231166,0.224455766985389,-1.25628691130721,0.209011965645027,0.665174710718392  
"4842","TMEM144",15.001185951236,0.643986782740811,0.512819220933173,1.25577738987426,0.209196691376112,0.665174710718392  
"4843","LMX1B",22.1654187429236,0.485379782416314,0.386332019510283,1.25637989579943,0.208978267103237,0.665174710718392  
"4844","AGAP9",23.9372039209769,0.559414234129222,0.445383365363718,1.25602857590422,0.209105609729706,0.665174710718392  
"4845","EIF3F",1530.47384468239,-0.303182115087751,0.241345764071906,-1.2562147765619,0.20903811073447,0.665174710718392  
"4846","IRAK4",55.3784752358457,-0.306475844618175,0.243966675847941,-1.25622011101711,0.209036177191071,0.665174710718392  
"4847","TTBK2",106.665618911189,0.304114449134743,0.242136252733031,1.25596413466449,0.209128973791521,0.665174710718392  
"4848","KANTR",44.1104355874812,0.459160885101178,0.365631869881983,1.25580104723744,0.209188111840626,0.665174710718392  
"4849","BNIP3L",831.395432049422,0.229633991293838,0.182919119007761,1.25538539951143,0.209338886977817,0.665253782060522  
"4850","AL133453.1",41.4001275805008,-0.504092848408966,0.401572191976184,-1.25529819664122,0.209370529579849,0.665253782060522

"4851", "AC051619.6", 2.96066912922812, -1.15300959886036, 0.918534605742044, -1.25527072322865, 0.209380499353005, 0.665253782060522  
"4852", "NFAT5", 319.256831514042, 0.304330443444431, 0.242495301706521, 1.25499521558874, 0.209480496796742, 0.665253782060522  
"4853", "FLOT2", 104.488024486738, 0.326378724555696, 0.260063149198884, 1.25499797092012, 0.209479496558571, 0.665253782060522  
"4854", "MYL9", 1495.53830412318, 0.414543698873319, 0.330282877560156, 1.25511713454724, 0.209436241184406, 0.665253782060522  
"4855", "AL136441.1", 5.27105571890793, 1.04789031236936, 0.835292252605709, 1.25451937223223, 0.209653288948379, 0.665665386022504  
"4856", "AL080250.1", 8.65446076679789, 0.752259196927501, 0.599753293169122, 1.25428106105517, 0.209739865237746, 0.665803134810515  
"4857", "PXYP1", 75.6363666263578, 0.339576607558907, 0.270841164169753, 1.25378506845464, 0.209920137846416, 0.665987757900654  
"4858", "ARHGAP32", 126.844295377818, -0.37419984677123, 0.298544552567317, -1.25341374864595, 0.210055170499161, 0.665987757900654  
"4859", "AC022364.1", 5.74937261802626, 0.846913842484032, 0.675567252647831, 1.25363365255587, 0.209975193547228, 0.665987757900654  
"4860", "NCLN", 71.9080733219325, 0.347419584177541, 0.277179955706526, 1.25340803699884, 0.210057248064417, 0.665987757900654  
"4861", "PRNP", 598.026903242511, 0.267369370581803, 0.213252171324985, 1.25377091787894, 0.209925282635263, 0.665987757900654  
"4862", "EIF1AX", 1362.11670058953, -0.163050045743323, 0.130059693492247, -1.2536554666957, 0.209967261154809, 0.665987757900654  
"4863", "BRPF3", 54.1457325696283, 0.327409266075946, 0.261251366641564, 1.25323465398422, 0.210120321806755, 0.666050742474013  
"4864", "WIPF2", 243.811936866332, 0.244923225556672, 0.195479502342951, 1.25293558977338, 0.210229148406822, 0.666258701211175  
"4865", "AL353622.1", 3.08156111287382, 1.19742033035758, 0.955919112351603, 1.25263771263226, 0.210337583586931, 0.666424703882124  
"4866", "FCGBP", 2.41086707301462, -1.17475300725271, 0.937885969480609, -1.2525541968639, 0.210367992805087, 0.666424703882124  
"4867", "ZC3H7B", 130.628362874751, 0.242148811116568, 0.193367269303065, 1.25227403784167, 0.21047002572108, 0.666610940310346  
"4868", "IRX2", 94.1568774406856, -0.447491638221256, 0.357513174107304, -1.25167873698256, 0.210686951039972, 0.666934089176569  
"4869", "C6orf132", 154.659043079893, -0.31928407983264, 0.255117205668336, -1.25151919485871, 0.210745115042431, 0.666934089176569  
"4870", "SIRT4", 6.20985600760238, 0.806213462415052, 0.644155918032087, 1.25158123964467, 0.210722494099561, 0.666934089176569  
"4871", "ALKBH7", 524.044312450865, -0.318825416355633, 0.254679607711239, -1.25186864869497, 0.21061773038836, 0.666934089176569  
"4872", "CISH", 20.2944746858529, -0.825491039350946, 0.659845989202291, -1.25103592786691, 0.210921369752311, 0.667354867555803  
"4873", "GPD2", 69.5407724020875, 0.36747197267898, 0.293775572759304, 1.25085952255144, 0.210985733967803, 0.667421524546212  
"4874", "ZNF345", 35.9194976130488, 0.369622744213546, 0.295524544283956, 1.25073450365731, 0.211031357650665, 0.667428883501231  
"4875", "SPATA17", 9.25582641969863, -0.613698441713549, 0.491169108916663, -1.24946465600644, 0.211495172953027, 0.667508478300003

"4876", "LINC01354", 36.173765795953, 0.575604750678289, 0.461003400001467, 1.24859111814893, 0.211814662578602, 0.667508478300003  
"4877", "N4BP2", 76.2676324760657, 0.302408339856684, 0.242218748458892, 1.24849270248792, 0.211850679185852, 0.667508478300003  
"4878", "AC098487.1", 60.3700683373426, 0.333656645825023, 0.267214912688568, 1.24864530376675, 0.211794834472158, 0.667508478300003  
"4879", "NUDT12", 58.5029849458684, 0.326471619229444, 0.261383322777125, 1.24901472580872, 0.211659687862956, 0.667508478300003  
"4880", "N4BP3", 3.47345803324436, 1.13062813096454, 0.905737000454544, 1.2482962829134, 0.211922574946494, 0.667508478300003  
"4881", "PPP1R35", 116.36062585669, -0.3246952621377, 0.259956495694536, -1.24903692546785, 0.211651568490846, 0.667508478300003  
"4882", "ENTPD1-  
AS1", 66.4099282858281, 0.260752579507936, 0.208757523054267, 1.24906913864921, 0.211639787142446, 0.667508478300003  
"4883", "INPP5A", 46.991255313287, -0.293907382989865, 0.235437019989232, -1.2483482122026, 0.211903565474127, 0.667508478300003  
"4884", "BATF2", 4.4111366243724, 0.978847254513549, 0.783845584223087, 1.24877561884046, 0.211747153858084, 0.667508478300003  
"4885", "PPP1CA", 317.70944641798, -0.271962063586046, 0.217769614592322, -1.24885220601219, 0.211719135214094, 0.667508478300003  
"4886", "LPAR6", 92.8781339485856, 0.244276609160503, 0.195638502308922, 1.24861214064489, 0.211806969671616, 0.667508478300003  
"4887", "MAP3K3", 158.189830394338, 0.271614376445592, 0.217244415882536, 1.25027092338453, 0.211200596274173, 0.667508478300003  
"4888", "SLC16A3", 6.76737597032225, -0.993828830313641, 0.795827964646024, -1.24879857766205, 0.211738754323609, 0.667508478300003  
"4889", "C3", 10035.2262827036, 0.301972872436593, 0.241864931578733, 1.24851862758902, 0.211841191097984, 0.667508478300003  
"4890", "ZNF324", 52.2555950996801, -0.407566290705479, 0.325936549711108, -1.25044672365441, 0.211136405559133, 0.667508478300003  
"4891", "PLCG1", 41.7856666995739, 0.40414348729458, 0.32326538688964, 1.25019103091464, 0.211229772421514, 0.667508478300003  
"4892", "MRPL39", 81.8890306329862, -0.376383706727236, 0.301119511739497, -1.24994791786476, 0.211318573461755, 0.667508478300003  
"4893", "SPIN3", 34.6454872714403, 0.37506563367619, 0.300104106198016, 1.24978507767806, 0.211378068611184, 0.667508478300003  
"4894", "HDX", 31.4622128766413, 0.375162794792569, 0.300138288666666, 1.24996646199054, 0.211311798964022, 0.667508478300003  
"4895", "PAXIP1-  
AS2", 74.2436776214996, 0.36552890956309, 0.29293001453706, 1.24783699663131, 0.212090757027414, 0.667565078426522  
"4896", "CD4", 6.55696070901885, -0.751405664068665, 0.602196839987896, -1.2477741731155, 0.212113769324236, 0.667565078426522  
"4897", "PPM1A", 212.024616345937, 0.214249235861796, 0.17169446682388, 1.24785172070553, 0.212085363849898, 0.667565078426522  
"4898", "TRIM28", 274.633528294117, -0.194451324171601, 0.155811492764826, -1.24799089413189, 0.212034391889767, 0.667565078426522  
"4899", "FAM162A", 361.568892371286, -0.370568623639187, 0.297087091558742, -1.24734003653577, 0.212272843160153, 0.66774201912078

"4900", "STEAP2", 106.274559713574, -0.436114612551844, 0.349631025810045, -1.24735672854384, 0.212266725377619, 0.66774201912078  
"4901", "PRDM11", 27.7000157023231, 0.360697603180616, 0.289190577535292, 1.24726609786101, 0.212299943931946, 0.66774201912078  
"4902", "CAPRIN1", 391.767313612868, 0.195334953049266, 0.156625433314003, 1.24714708790403, 0.212343569947819, 0.667742988728198  
"4903", "Clorf21", 978.899281185694, 0.213230971458812, 0.171000242423134, 1.24696297757976, 0.212411072856406, 0.667819026734957  
"4904", "FAM13A-  
AS1", 15.8699025059566, 0.627956252091015, 0.503785629904654, 1.24647511722369, 0.212590018782364, 0.668121960526814  
"4905", "GIPC1", 220.661253621575, -0.304527684856285, 0.24431326811701, -1.24646396490606, 0.212594110696336, 0.668121960526814  
"4906", "AL354953.1", 6.74008881322425, -0.74803006527028, 0.600313451991577, -1.24606580576971, 0.212740237145093, 0.668142987577971  
"4907", "ARIH20S", 29.0779668477122, 0.480669149938867, 0.385851141246427, 1.24573727678023, 0.212860863574143, 0.668142987577971  
"4908", "AC009570.1", 5.10571228804697, -0.80266470741666, 0.644093275762185, -1.24619327296474, 0.212693448138619, 0.668142987577971  
"4909", "PCDHGB7", 34.9793337046495, 0.442371139913917, 0.354975066491675, 1.24620341447078, 0.212689725845148, 0.668142987577971  
"4910", "LYRM4", 200.042465737511, -0.266525241630944, 0.213944119886274, -1.2457703524295, 0.212848716908441, 0.668142987577971  
"4911", "PLGRKT", 154.866711647434, -0.311780575877948, 0.250249195372748, -1.24588043295623, 0.2128082946594, 0.668142987577971  
"4912", "ERIC6-  
AS1", 14.611888549422, -0.646511114193626, 0.51927873477795, -1.24501750388466, 0.213125316160212, 0.668428636543166  
"4913", "ARHGEF17", 39.4004045134508, 0.404372392666259, 0.324703719879336, 1.24535805384838, 0.213000164760904, 0.668428636543166  
"4914", "SINHCAF", 22.2376190595913, -0.514526614283638, 0.413212713668599, -1.24518582624322, 0.21306345141262, 0.668428636543166  
"4915", "AP1G1", 128.315727119667, 0.247138122028273, 0.198490794015005, 1.24508606686107, 0.213100115142983, 0.668428636543166  
"4916", "MRPL47", 199.546432390034, -0.348010926152997, 0.279712659255879, -1.24417295620017, 0.213435914703205, 0.669198274740231  
"4917", "ESRRA", 143.944713143009, -0.306085642233548, 0.246029214634213, -1.24410283018066, 0.213461719567199, 0.669198274740231  
"4918", "DTX3", 59.4384054592631, 0.362101415370857, 0.291079188820295, 1.24399623634519, 0.213500948113685, 0.669198274740231  
"4919", "ENDOG", 147.394623098978, -0.357353352480008, 0.287398436316058, -1.24340743485124, 0.213717731932864, 0.669605454826241  
"4920", "FERMT2", 819.118281461954, 0.256586854386022, 0.206353468655671, 1.24343368714665, 0.213708063031107, 0.669605454826241  
"4921", "FM02", 39.1355791278605, 0.654989789590534, 0.526870927501451, 1.24316935211562, 0.213805433860226, 0.669608037983621  
"4922", "LACTB", 145.606836656864, -0.485588062844836, 0.390594200776659, -1.2432034625176, 0.213792867105579, 0.669608037983621  
"4923", "MTRNR2L12", 50.136228835692, -0.481420379916602, 0.387474881699808, -1.24245571172166, 0.2140684712924, 0.669628732402229



"4924", "ANAPC4", 72.2812862858076, -0.251697095019957, 0.202565648959131, -1.24254579349107, 0.214035255601085, 0.669628732402229  
"4925", "CAMLG", 876.27653889406, -0.24434552400825, 0.196683821979611, -1.24232649919513, 0.214116122089561, 0.669628732402229  
"4926", "KMT5B", 239.072480592212, 0.23003603554574, 0.185094736406471, 1.24280160533889, 0.213940950819728, 0.669628732402229  
"4927", "ZDHC17", 155.767052381347, 0.267680395720989, 0.215442040833815, 1.24247057206197, 0.214062991609372, 0.669628732402229  
"4928", "CDK2AP1", 1063.36177039359, -0.276891123330221, 0.222777811779074, -1.24290260829391, 0.213903724436296, 0.669628732402229  
"4929", "PKIG", 372.839807524286, -0.310960185335944, 0.250302337875824, -1.24233831763175, 0.214111763386815, 0.669628732402229  
"4930", "DNAH1", 5.61374916632032, 0.832516524331417, 0.670191887527713, 1.24220620963126, 0.214160489165811, 0.669631630931231  
"4931", "P2RY1", 12.4640735144311, 0.701153384453346, 0.564615595338294, 1.24182433188592, 0.214301383217752, 0.669800450588329  
"4932", "FIGNL1", 29.3169314163658, 0.474774531086959, 0.382307696353386, 1.24186495750821, 0.214286391190472, 0.669800450588329  
"4933", "RNF4", 113.012690571521, 0.247262443487655, 0.199250009009851, 1.24096578322077, 0.214618389370977, 0.670655275117295  
"4934", "C11orf1", 48.9593027672303, -0.474574700222228, 0.382476176567707, -1.24079545157819, 0.21468132193055, 0.670715966266603  
"4935", "LINC02062", 3.41924142392015, 1.04278230439568, 0.84065928775936, 1.24043393034418, 0.214814937530857, 0.670997418852718  
"4936", "PBXIP1", 205.169861390816, 0.226523979948072, 0.182636229138298, 1.24030145068611, 0.214863916046886, 0.671014437978675  
"4937", "ZNF786", 11.9737997461917, 0.654930146705322, 0.528278051569404, 1.23974513943871, 0.215069675483555, 0.671249047900183  
"4938", "DBX2", 20.9464431762845, 0.591753252912468, 0.47728210005987, 1.23983961023939, 0.215034724141038, 0.671249047900183  
"4939", "TBX21", 2.5274917016935, 1.37372066131166, 1.10787050236305, 1.23996501250062, 0.2149883354159, 0.671249047900183  
"4940", "UACA", 507.864823629613, 0.289676364232713, 0.233736580617848, 1.2393283219383, 0.215223934247088, 0.67159452356657  
"4941", "STAT1", 292.358025460355, 0.359490125513138, 0.290127751223069, 1.23907528320771, 0.215317619487515, 0.671648128833878  
"4942", "NHP2", 439.793733122661, -0.273758265287491, 0.220984641277739, -1.23881127532037, 0.215415397272442, 0.671648128833878  
"4943", "YME1L1", 467.259496493382, 0.185314463357246, 0.149587438215305, 1.23883706792624, 0.215405843330483, 0.671648128833878  
"4944", "EFCAB13", 34.7035062079273, 0.486353277667581, 0.392522916003073, 1.23904428974479, 0.215329096548872, 0.671648128833878  
"4945", "EIF4A1", 2439.12827178467, -0.213784857192754, 0.172653496278831, -1.23823068631925, 0.215630536341602, 0.672182956057795  
"4946", "UBXN10-AS1", 3.68801451857461, -1.26889965787609, 1.02522159957802, -1.23768330514922, 0.215833511843093, 0.672213150841646  
"4947", "CPS1", 8.48047300674587, -0.698404060639049, 0.564242086810774, -1.2377737800216, 0.215799953187066, 0.672213150841646  
"4948", "PSMG3", 174.409578230189, -0.316587163265966, 0.255803911038893, -

1.23761658678405,0.215858261217395,0.672213150841646  
"4949","DLEU1",13.6247859288022,-0.56439520039504,0.455920980541865,-1  
.23792329040057,0.215744505502003,0.672213150841646  
"4950","PDHA1",178.232798202979,-0.293461122329893,0.237042549260158,-  
1.23801032028142,0.215712234170721,0.672213150841646  
"4951","SMURF1",53.1917033515032,0.333646594772636,0.269681334480457,1  
.23718831121705,0.216017179969339,0.672490014336848  
"4952","LGMN",582.745735302432,-0.189643725867272,0.153307962756569,-1  
.23701158411712,0.216082782038808,0.672490014336848  
"4953","DUS1L",151.751705335741,-0.312850334028913,0.252929584596109,-  
1.23690684317728,0.216121669219899,0.672490014336848  
"4954","HSD17B14",36.264006128469,-0.714609869415144,0.577682249392239  
, -1.23702930143165,0.216076204627545,0.672490014336848  
"4955","TSC22D4",187.076825999157,0.215889884811633,0.174611795730949,  
1.23639920148515,0.216310212799651,0.672940853745029  
"4956","MATN1-  
AS1",5.28574577028626,-0.746016133654627,0.603652318720918,-1.23583743  
575336,0.216518996610994,0.673318606568182  
"4957","RPL36",7862.84215215789,-0.291948997874605,0.236229524433073,-  
1.23587006567131,0.216506865528053,0.673318606568182  
"4958","ERMAP",37.6643261011939,0.382597713044498,0.309866278308042,1.  
23471877977039,0.216935184119998,0.673436445597939  
"4959","AL356488.3",11.936698679626,-0.674131028762491,0.5465793179080  
26,-1.23336358818452,0.217440143495049,0.673436445597939  
"4960","PEAR1",47.410214297994,0.715643340941078,0.57942046698104,1.23  
510193671584,0.216792568713999,0.673436445597939  
"4961","LINC00467",86.2601446401013,0.346781610553643,0.28089846263110  
2,1.23454435209588,0.217000130452771,0.673436445597939  
"4962","AL390728.6",59.8981594358095,0.530542230230657,0.4295888996481  
22,1.2349998583884,0.21683055684324,0.673436445597939  
"4963","AC010207.1",4.24664504571587,1.18931919076866,0.96292331081397  
3,1.23511309510548,0.216788416444682,0.673436445597939  
"4964","C4orf48",86.359010655289,0.58192799728844,0.471975634028784,1.  
2329619483131,0.217589961205174,0.673436445597939  
"4965","RASGEF1B",25.6884521142912,-0.579840421509942,0.47024034705337  
3,-1.23307245995234,0.217548731302645,0.673436445597939  
"4966","ATXN1",187.218379767428,0.294677663984343,0.238974785900303,1.  
23309102621093,0.217541805117107,0.673436445597939  
"4967","ARMC10",236.307202439822,-0.283837085803284,0.230200624239191,  
-1.23299876679901,0.217576224267025,0.673436445597939  
"4968","AK8",5.79607893937178,0.82375570912683,0.668126133622526,1.232  
93442311632,0.217600231234347,0.673436445597939  
"4969","SFR1",71.5287110820262,-0.284384080665285,0.230613670117828,-1  
.23316228617316,0.217515222896276,0.673436445597939  
"4970","FTH1",37796.4072488613,-0.329896602930227,0.267043351713915,-1  
.23536721964023,0.216693866901203,0.673436445597939  
"4971","RELT",8.46845293106438,-0.820689554421306,0.664223422471617,-1  
.23556250300158,0.216621229963566,0.673436445597939  
"4972","CD27-  
AS1",152.548544194149,0.284667670087963,0.230570707490511,1.2346220089

5436,0.216971214000846,0.673436445597939  
"4973","PA2G4",643.395060292752,-0.23544647261378,0.190857347358329,-1  
.23362540595168,0.217342521480364,0.673436445597939  
"4974","AL136295.7",5.67940585327133,0.798061931155087,0.6459921144787  
23,1.23540506651397,0.216679788137149,0.673436445597939  
"4975","STUB1",772.605474283244,-0.280282971447519,0.227161381311688,-  
1.23384956469755,0.217258966150556,0.673436445597939  
"4976","ZNF205",75.0349501125057,-0.287689831203665,0.233234245700847,  
-1.23348023074049,0.217396647971509,0.673436445597939  
"4977","AC009152.1",3.57334455787734,-1.02609103565588,0.8322441981084  
59,-1.23292062352372,0.217605380183155,0.673436445597939  
"4978","TMEM220",129.333806901277,-0.279382032417359,0.226348513509906  
, -1.2343002747625,0.217091033592394,0.673436445597939  
"4979","MED16",85.3115967451199,0.310101169545501,0.251177290729979,1.  
23459078901709,0.216982838781384,0.673436445597939  
"4980","ZNF44",70.852967355356,0.316540098909937,0.256537598340957,1.2  
3389359281844,0.217242557352597,0.673436445597939  
"4981","MTMR1",26.113155052092,0.437834541370665,0.354746164326541,1.2  
3421924012021,0.217121219851333,0.673436445597939  
"4982","AC244453.2",2.95805834983032,1.38898464492185,1.12834546782361  
,1.23099235520568,0.218325723528092,0.67350230702132  
"4983","SLC25A12",91.9435427334224,-0.305108630813827,0.2477331812396,  
-1.23160179547662,0.218097869918678,0.67350230702132  
"4984","WDR12",51.5052545677597,0.324659869553456,0.263713431228922,1.  
23110858647024,0.218282254534926,0.67350230702132  
"4985","RCAN2",81.1222151439906,-0.487077521288622,0.395474374768127,-  
1.23162852605609,0.21808787997551,0.67350230702132  
"4986","VCP",573.068732589221,0.158287503518516,0.128563063887251,1.23  
120512791553,0.218246154008593,0.67350230702132  
"4987","AL596244.1",9.07839814108146,0.668771517746873,0.5425643238379  
77,1.23261240808488,0.217720405358838,0.67350230702132  
"4988","BMI1",260.606672322109,0.201120215625214,0.163169210954977,1.2  
3258680021876,0.217729964112323,0.67350230702132  
"4989","RAN",851.752437051661,-0.3224773154911,0.261823256136808,-1.23  
1660320207,0.218075998066476,0.67350230702132  
"4990","METTL3",67.3248357003791,0.269442566110072,0.218751547464219,1.  
.23172873167512,0.218050433342847,0.67350230702132  
"4991","PTGR2",34.3267255826767,-0.390975445169891,0.31731950975385,-1.  
.23211915168146,0.217904578273849,0.67350230702132  
"4992","CES1",171.647693079429,0.874307008555035,0.709797833300607,1.2  
317690580844,0.218035364751281,0.67350230702132  
"4993","POLR2C",230.550535348514,-0.281282474632862,0.228477349477626,  
-1.23111754962129,0.218278902690399,0.67350230702132  
"4994","UTP18",97.396033821769,-0.288867111465104,0.23462834629891,-1.  
23116885074532,0.218259718922099,0.67350230702132  
"4995","TEN1",109.372845731913,-0.388754349750966,0.315435814896593,-1.  
.23243566960971,0.21778638340108,0.67350230702132  
"4996","UBXN6",357.478706588948,-0.22811649107827,0.185139818502618,-1.  
.23213089935617,0.217900190605613,0.67350230702132  
"4997","ZNF561-

AS1",32.6272653369674,0.346341440679167,0.281304039317698,1.2311996710  
7197,0.218248194415991,0.67350230702132  
"4998","SLC25A30",16.1700289727111,0.513392475471056,0.41711243646314,  
1.23082514591105,0.218388268557065,0.673560456143887  
"4999","BRD2",869.782750210108,0.30526798037507,0.24806660833665,1.230  
5887617119,0.218476710585307,0.673589003880315  
"5000","ATP5F1D",1216.53456666583,-0.307433785654539,0.249831036262889  
,-1.23056682729778,0.218484918546972,0.673589003880315  
"5001","DESI2",326.305496617043,-0.199039252010955,0.161900958231166,-  
1.22938896832693,0.218926004384907,0.673946022625884  
"5002","AC025171.3",3.6393684975541,-1.20498301340615,0.98001094502743  
3,-1.22956077125487,0.218861627639456,0.673946022625884  
"5003","AC011379.1",18.807661204604,-0.562563446933792,0.4576338638069  
53,-1.22928719097392,0.218964148069568,0.673946022625884  
"5004","DEK",1340.26970067887,-0.232143409049863,0.188898192119524,-1.  
2289339905539,0.219096556045884,0.673946022625884  
"5005","POLH",30.875929146553,0.441898666976145,0.359601325698833,1.22  
885716874758,0.219125362659807,0.673946022625884  
"5006","AL139407.1",2.36082629334323,1.43120016662527,1.16432858205384  
1,1.22920641877629,0.218994422927943,0.673946022625884  
"5007","LINC01001",4.66895255684695,0.984700459459182,0.80094695214739  
1,1.22942032155705,0.218914254915852,0.673946022625884  
"5008","RPS6KA4",68.4304671428992,-0.323880763505352,0.263384173438248  
,-1.22968954162042,0.21881338465868,0.673946022625884  
"5009","AC008149.2",6.12434374005804,-0.779535101186725,0.634274791825  
548,-1.22901794495583,0.219065077963693,0.673946022625884  
"5010","APEX1",478.398819818602,-0.327445696073436,0.266212830502054,-  
1.23001470461023,0.21869159845349,0.673946022625884  
"5011","METTL9",588.939405821396,-0.265476183406464,0.215809870803328,  
-1.23013920734144,0.218644980224626,0.673946022625884  
"5012","NDUFB11",828.359841375501,-0.309628645608032,0.251937217390245  
,-1.22899128924022,0.219075071975256,0.673946022625884  
"5013","DCP1A",204.896716534134,0.248983550437153,0.202673872535213,1.  
2284935760227,0.219261739429174,0.674230942210395  
"5014","AC112715.1",6.93781795330423,-0.836643179954792,0.681557022919  
57,-1.22754685495116,0.219617122525529,0.674724863355328  
"5015","SYPL1",627.739299762092,-0.291083741347305,0.237145770451342,-  
1.22744648067435,0.219654825559964,0.674724863355328  
"5016","OLFM1",134.874696869782,0.42363243764185,0.345142365193921,1.2  
2741361352099,0.219667172276597,0.674724863355328  
"5017","AL450326.1",37.6388311444092,-0.377028278165478,0.307148123554  
394,-1.22751288141504,0.21962988329693,0.674724863355328  
"5018","EMID1",11.2722987994769,0.861044759086104,0.701485953961839,1.  
22745830365257,0.219650384318683,0.674724863355328  
"5019","COX7B",710.326443817402,-0.325479217988709,0.265185093552022,-  
1.22736619026763,0.219684987945533,0.674724863355328  
"5020","RADIL",66.2916302951958,0.281190438728985,0.229170592520583,1.  
22699180394941,0.21982567144822,0.675022455253846  
"5021","PNPT1",112.372991317057,-0.278426581145282,0.226955268687206,-  
1.2267905599011,0.219901319826608,0.67512026391698

"5022", "AL451064.1", 2.86637057844804, 1.16824627980604, 0.95268256825421  
8, 1.22627023809918, 0.220096997290862, 0.675586462213985  
"5023", "LINC02649", 2.64712049569519, 1.42244465608547, 1.16026421668999,  
1.22596615117843, 0.220211413106704, 0.675803092383008  
"5024", "CD86", 5.98674837852949, -1.28371169278741, 1.04791221025112, -1.2  
2501835576454, 0.220568304567906, 0.676188162929621  
"5025", "KLHL2", 39.7737769199404, 0.355646229232566, 0.290247840100269, 1.  
22531912419987, 0.220455005597649, 0.676188162929621  
"5026", "DNAJC3", 463.654851001466, -0.188182007198107, 0.153593340820794,  
-1.22519639323211, 0.220501233107209, 0.676188162929621  
"5027", "KLHDC1", 59.2815457753157, 0.328280131813265, 0.267883236663263, 1.  
.22545977830603, 0.220402035756173, 0.676188162929621  
"5028", "WHAMM", 77.0926317003754, 0.268846515082281, 0.219458813007185, 1.  
22504314772485, 0.220558963898735, 0.676188162929621  
"5029", "ANKRD54", 55.2527200340981, -0.279395108717172, 0.22808992559991,  
-1.22493401662665, 0.220600082476358, 0.676188162929621  
"5030", "PDPN", 284.354488268194, 0.459856482325328, 0.375502717672941, 1.2  
2464222143356, 0.220710052502994, 0.676357292891917  
"5031", "AP005205.2", 4.69337652407809, -1.00939263075145, 0.8242935662294  
31, -1.22455478497632, 0.220743012684997, 0.676357292891917  
"5032", "MAST2", 77.3566108773078, -0.283479242720246, 0.231587958101408, -  
1.2240672833089, 0.220926846764493, 0.676786037932167  
"5033", "BLOC1S2", 215.694205379332, -0.321428485109024, 0.262668372665332  
, -1.22370455889853, 0.221063699253339, 0.677070718058857  
"5034", "SDHB", 261.1543223729, -0.266859022398989, 0.218156903201681, -1.2  
2324353931759, 0.221237725267439, 0.677230951825496  
"5035", "UBLCP1", 160.882366512545, -0.250727988046682, 0.20499377835857, -  
1.22310047677698, 0.221291748578983, 0.677230951825496  
"5036", "ZNF487", 43.7443667308499, -0.389385064025588, 0.318299184771645,  
-1.22333038428905, 0.221204935459157, 0.677230951825496  
"5037", "MAGEH1", 320.524466050607, -0.327318368608106, 0.267598937078068,  
-1.2231676709262, 0.221266373530586, 0.677230951825496  
"5038", "POU5F2", 32.6202276997206, 0.51701320165479, 0.422767049170501, 1.  
22292691133145, 0.221357303097225, 0.677268014499559  
"5039", "DST", 1584.43057319044, 0.323823773508549, 0.26482025029881, 1.222  
80593399924, 0.221403003663764, 0.677268014499559  
"5040", "PRR5L", 22.7134551433686, 0.642994078568754, 0.525872113873367, 1.  
22271948180084, 0.221435666109489, 0.677268014499559  
"5041", "LMCD1-  
AS1", 10.8568323285112, 0.615850089080261, 0.503793946242967, 1.2224245520  
8712, 0.221547119284787, 0.677299274191813  
"5042", "AC004540.2", 7.31533663564076, 1.06538218110533, 0.87200419909266  
3, 1.22176267294799, 0.221797388006505, 0.677299274191813  
"5043", "FUOM", 122.143099491484, 0.419686563284778, 0.343499516573314, 1.2  
21796663563, 0.221784530596159, 0.677299274191813  
"5044", "AC132192.1", 5.41447711338746, -0.990097934757413, 0.810280274241  
214, -1.22192032341475, 0.221737759087703, 0.677299274191813  
"5045", "ERN1", 63.693407196096, -0.31716819952921, 0.259536548287139, -1.2  
2205601339165, 0.221686445591173, 0.677299274191813  
"5046", "AC087741.1", 11.1888962439836, 0.651988870545838, 0.5333940683510

69,1.22233993445295,0.221579103488911,0.677299274191813  
"5047","PPFIA3",3.27464876208687,-0.994269410534223,0.813527824101203,  
-1.22217013490928,0.221643295165198,0.677299274191813  
"5048","LRCH2",39.8239059284155,0.361385138837539,0.295692913980257,1.  
22216367640676,0.221645737025475,0.677299274191813  
"5049","MED19",155.474208732059,-0.228975995737141,0.187445920917886,-  
1.22155763441471,0.221874957933346,0.677401956138349  
"5050","SLC66A1L",199.673163361113,0.555482864516859,0.455107930229382  
1.22055193421237,0.222255714626903,0.677893122472045  
"5051","CUTA",738.550030704895,-0.383168169187544,0.313927824640435,-1  
.22056134917768,0.22225214796589,0.677893122472045  
"5052","ZHX1",235.567306081114,0.218651906897855,0.179101698892568,1.2  
2082542069582,0.22215212673751,0.677893122472045  
"5053","AC068790.7",4.92010603225827,0.909306274538394,0.7447557112029  
21,1.22094568844553,0.222106584126937,0.677893122472045  
"5054","ZNF213",39.046243386461,-0.327260590188911,0.268116252939623,-  
1.2205921371824,0.222240484865897,0.677893122472045  
"5055","STAG2",500.652046831106,0.253248942038676,0.20751585318762,1.2  
2038359069226,0.22231949493694,0.677953514234013  
"5056","NPIP13",4.49771018391116,1.00838793512335,0.826422800160947,1  
.2201840691314,0.222395104641367,0.67804994818961  
"5057","TRNP1",3.45281746386885,-1.03218683719348,0.846732090630003,-1  
.21902411472971,0.222835039900869,0.678166232791736  
"5058","RAB3GAP2",167.587988737921,0.238068325843832,0.195363490803842  
1.21859168703567,0.222999205789479,0.678166232791736  
"5059","AL591848.4",2.99732105169641,1.24383529721699,1.01995686955524  
1.21949793598565,0.222655258786199,0.678166232791736  
"5060","ORC4",140.778831205352,0.239170815168722,0.196553640123895,1.2  
1682211033062,0.223671905686589,0.678166232791736  
"5061","PDE6D",61.5716131113461,-0.368944553747062,0.302817825813893,-  
1.21837131864823,0.223082899237599,0.678166232791736  
"5062","PLXNB1",38.492425223326,0.428678050108748,0.351897725362239,1.  
21818931812495,0.223152037945291,0.678166232791736  
"5063","NSA2",1064.65187281397,-0.295621386293051,0.242734481620837,-1  
.21787965318758,0.223269709288438,0.678166232791736  
"5064","DMGDH",27.0918604260656,0.393308817291332,0.322616677238188,1.  
21912115845441,0.222798210323768,0.678166232791736  
"5065","RBM22",199.722102042437,-0.1940476241758,0.159444932092863,-1.  
21701970472654,0.22359671880079,0.678166232791736  
"5066","GNL1",253.426513650293,-0.199854677031561,0.163852615042502,-1  
.21972223012565,0.222570191496525,0.678166232791736  
"5067","BCCIP",117.066665692583,-0.222628781993054,0.182926080237039,-  
1.21704232499033,0.223588112689775,0.678166232791736  
"5068","TMX2",187.843946801079,-0.26895693304974,0.220708318179327,-1.  
2186080491593,0.222992992534207,0.678166232791736  
"5069","AC009318.2",3.19786011293176,0.997520686172911,0.8190311020427  
21,1.21792772421587,0.223251439594405,0.678166232791736  
"5070","SHMT2",137.28107686589,-0.285418097101296,0.234502199651951,-1  
.2171233256017,0.223557297120811,0.678166232791736  
"5071","MAPKAPK5-

AS1",123.281285423632,-0.311504877532569,0.255786023125914,-1.21783385  
083253,0.223287117754154,0.678166232791736  
"5072","HMGB1",3757.90247591074,-0.258458056363895,0.212284708828508,-  
1.21750670498217,0.22341148692088,0.678166232791736  
"5073","MEDAG",1516.12886383085,0.293244279411216,0.240802814502553,1.  
21777762447252,0.223308489482136,0.678166232791736  
"5074","CARS2",165.827149617096,-0.251728683021216,0.206667000566732,-  
1.2180400466979,0.223208754904198,0.678166232791736  
"5075","OSGEP",126.590580211,-0.25182022988336,0.20693515513969,-1.216  
90405728002,0.223640721758256,0.678166232791736  
"5076","ZC2HC1C",5.53099049469181,-0.786158279565316,0.645883163200322  
, -1.21718342319056,0.223534435782488,0.678166232791736  
"5077","SETD3",116.851777326676,-0.257560149818185,0.21151261064473,-1  
.2177058806711,0.223335761538976,0.678166232791736  
"5078","DNAJC17",97.4212246248501,-0.304383368260229,0.249981450541612  
, -1.2176238180903,0.223366959007094,0.678166232791736  
"5079","ARMC7",22.8743548585943,0.413376293752475,0.339513412572583,1.  
21755511990002,0.223393078174981,0.678166232791736  
"5080","SOCS6",65.3284758049006,0.253812659766808,0.208088240414167,1.  
21973572010429,0.222565075939226,0.678166232791736  
"5081","HPN",2.54728664669621,1.91050862765438,1.56716098958384,1.2190  
889387578,0.222810437708044,0.678166232791736  
"5082","CSNK2A1",291.471745189694,0.266991516373056,0.218989775888072,  
1.21919626288635,0.222769710034487,0.678166232791736  
"5083","TRMT2A",60.8940969141905,-0.311507693850658,0.25557472234087,-  
1.21885173540436,0.222900471234016,0.678166232791736  
"5084","TOMM22",313.682170252622,-0.27846202605781,0.228862026511131,-  
1.21672446190747,0.22370906868284,0.678166232791736  
"5085","AC245140.2",3.7420542547074,1.24123471509314,1.01857905175301,  
1.21859438691276,0.222998180545717,0.678166232791736  
"5086","AC099343.3",64.4514238281726,-0.412751822634547,0.339357303612  
455,-1.2162750535816,0.223880161244671,0.678293983002295  
"5087","PTCH1",47.6270212958025,0.475303979361426,0.390783521966911,1.  
21628459912819,0.22387652622305,0.678293983002295  
"5088","ZNF688",168.142400978463,-0.271649461069012,0.223346892054751,  
-1.2162670300441,0.223883216705525,0.678293983002295  
"5089","ZNF778",14.0720198424626,0.592425966625751,0.487218283677024,1.  
2159354163697,0.224009525317926,0.678543295888353  
"5090","MRPS15",397.415605971867,-0.317924514212253,0.261599485569708,  
-1.21531016591979,0.22424781606615,0.678598367620673  
"5091","LINC02580",8.47797431800689,0.841288349521206,0.69202908185872  
2,1.21568351905326,0.224105504743135,0.678598367620673  
"5092","AC093388.1",2.75434332043145,-1.23167924231629,1.0132356421446  
6,-1.21559012640857,0.224141097237977,0.678598367620673  
"5093","SCAMP1",243.19757217891,0.195447417356521,0.160817778395543,1.  
21533464338628,0.224238483991693,0.678598367620673  
"5094","LRRC8E",8.30034337313472,-0.741944962516676,0.610489419582791,  
-1.21532812644603,0.224240968558792,0.678598367620673  
"5095","FRS3",29.0398905023358,-0.390741963861617,0.321573064767342,-1  
.21509543762416,0.224329693482912,0.678712899909537

"5096", "PLA2G15", 64.5601896706633, 0.290227152072974, 0.239058283059217, 1.21404348913977, 0.22473111763391, 0.679793991037427  
"5097", "SNRPF", 512.91971921511, -0.277024187091547, 0.228424084992194, -1.21276259944749, 0.225220598510147, 0.681140970381384  
"5098", "CLCN6", 63.4068992114541, 0.303223506631771, 0.250112129538716, 1.21235026542299, 0.225378330268724, 0.681184928121818  
"5099", "LSM2", 416.108004877604, -0.313613500889893, 0.258725615295942, -1.21214708690969, 0.225456081951185, 0.681184928121818  
"5100", "HPS5", 49.4796138400789, 0.344450496572386, 0.284103405250658, 1.21241241817741, 0.225354549682943, 0.681184928121818  
"5101", "HIPK3", 352.331674569897, -0.24398837794625, 0.201227677209936, -1.21249910215732, 0.22532138607087, 0.681184928121818  
"5102", "PRMT2", 437.225074480713, 0.174319597320041, 0.143804028311349, 1.21220246308138, 0.225434888882231, 0.681184928121818  
"5103", "MRPL13", 234.875646926686, -0.337892550258224, 0.278832753615961, -1.21181082880818, 0.225584802166673, 0.681440275406481  
"5104", "MBLAC2", 41.1603251192812, 0.309881396429586, 0.255802037724421, 1.21141097696581, 0.225737934465333, 0.681602038501158  
"5105", "PTPA", 94.4698534131883, -0.240034866229484, 0.198177867947713, -1.21120924710329, 0.225815219631879, 0.681602038501158  
"5106", "VAMP1", 18.6064438608791, 0.495388470460949, 0.408910575219757, 1.21148363598744, 0.225710102535383, 0.681602038501158  
"5107", "SMIM10L1", 195.012863660899, -0.277791067035633, 0.229331379876251, -1.21130857532681, 0.225777163419949, 0.681602038501158  
"5108", "TMEM220-AS1", 20.4546681507161, -0.413719882370544, 0.34169461783942, -1.21078840804268, 0.225976508997273, 0.681955341854535  
"5109", "RPL15", 12561.7226804778, -0.292431033196946, 0.241573520328538, -1.21052602453796, 0.226077110821703, 0.682125398965854  
"5110", "CEP350", 303.657989313187, 0.290037693745885, 0.239934131269505, 1.20882215552777, 0.226731177848612, 0.682128694709167  
"5111", "ADIPOR1", 163.462199820746, -0.259582119351694, 0.214744038555887, -1.2087977906038, 0.226740540630227, 0.682128694709167  
"5112", "LINC02613", 5.32294543814255, 0.879345779434885, 0.726798453669518, 1.20988944733602, 0.226321317027748, 0.682128694709167  
"5113", "NAALADL2", 125.768473675375, 0.266631307325664, 0.220576285397492, 1.20879407704767, 0.22674196767368, 0.682128694709167  
"5114", "PGBD1", 23.2397546344625, 0.427703334015462, 0.353711716409768, 1.2091862219231, 0.226591309817731, 0.682128694709167  
"5115", "CCM2", 205.715787337707, -0.262423864914295, 0.217012812965339, -1.20925516483771, 0.226564830071637, 0.682128694709167  
"5116", "BAG1", 528.824089304421, -0.279874306843861, 0.231385777890503, -1.20955708425738, 0.226448894198373, 0.682128694709167  
"5117", "NANS", 254.665844956692, -0.285661410760854, 0.236169138366762, -1.20956282745645, 0.226446689242736, 0.682128694709167  
"5118", "MRE11", 133.030831536502, 0.271703545458677, 0.22459162900881, 1.20976701873434, 0.226368305132888, 0.682128694709167  
"5119", "GDE1", 181.160803350742, -0.234046585788175, 0.193555907377965, -1.20919371027588, 0.22658843356788, 0.682128694709167  
"5120", "PDP2", 13.4498391666537, 0.59837615420764, 0.494851762264996, 1.20



920283575186,0.226584928539993,0.682128694709167  
"5121","PHF12",76.3804127085269,0.27698587930046,0.229036038766516,1.2  
093550027855,0.226526488006338,0.682128694709167  
"5122","SLC66A2",176.928544105577,-0.217622728627992,0.179846912649918  
, -1.21004428389386,0.226261900713759,0.682128694709167  
"5123","ZNF442",5.50902244072715,0.792802887449631,0.655810436500389,1  
.20889031848941,0.226704986129945,0.682128694709167  
"5124","FTSJ1",66.5006393237163,-0.31346356688081,0.259265162727198,-1  
.20904622735851,0.226645086030248,0.682128694709167  
"5125","BRK1",1308.91255452416,-0.255214110376602,0.211244907004532,-1  
.20814325891003,0.226992162680091,0.682614941028796  
"5126","PFDN6",165.569927821997,-0.325127758200802,0.269111153483984,-  
1.20815415485985,0.226987972313834,0.682614941028796  
"5127","CUX1",209.483687747268,0.206535741341366,0.170994317476584,1.2  
0785149114473,0.227104391293436,0.682819229917751  
"5128","SENP6",343.779441410479,0.230606762936399,0.19099789511814,1.2  
0737855667864,0.227286389795754,0.683099960752887  
"5129","YIF1B",102.768644934667,-0.347563473814466,0.287850344064981,-  
1.20744505254441,0.227260794033747,0.683099960752887  
"5130","AL645728.1",8.43301002667912,-0.680376994079441,0.563636156562  
944,-1.20712091684888,0.227385580597542,0.683215311987691  
"5131","SIL1",283.459774923102,0.283801375631905,0.235120082704573,1.2  
0704863815695,0.227413413286334,0.683215311987691  
"5132","SNX15",134.90190834209,-0.305628799499774,0.253284426720995,-1  
.20666242080663,0.22756217693715,0.683529025231133  
"5133","ZNF638",417.350402141943,0.264268105108223,0.219032604935565,1  
.20652404780541,0.227615492484161,0.683555974409378  
"5134","NOL9",85.6345821214834,0.239352223221921,0.198443339262642,1.2  
0614893959799,0.227760067616508,0.683575219483606  
"5135","BORCS7",469.116176888705,-0.234778851828784,0.194641989109294,  
-1.20620865468526,0.227737047701562,0.683575219483606  
"5136","TSG101",260.603294689666,-0.291558550315188,0.241747207804233,  
-1.20604722992827,0.227799280083508,0.683575219483606  
"5137","LINC00324",22.7154924326409,-0.443223978762794,0.3674858710977  
25,-1.2060980125272,0.227779701098084,0.683575219483606  
"5138","P2RX4",74.0924370578514,0.292405281377909,0.242495864702316,1.  
20581553725405,0.227888623290416,0.683710223437477  
"5139","CAVIN1",3281.89105379417,-0.248895609078282,0.206454085719793,  
-1.2055736664669,0.227981917921184,0.683723981469854  
"5140","STXBP2",6.54793939746247,-0.823565263772203,0.683095052971238,  
-1.20563786868309,0.227957151128674,0.683723981469854  
"5141","NEDD4L",10.8764028215264,0.560126330433067,0.464738616942955,1  
.20525024177584,0.228106712117669,0.683965175509409  
"5142","SIX5",95.6008148029424,0.298713652001128,0.247886258782808,1.2  
0504320597639,0.228186622921269,0.684071721573581  
"5143","MIIP",54.5839178492503,-0.363500935634103,0.302601128131639,-1  
.20125439676474,0.229652534333597,0.68416563407269  
"5144","CEPT1",91.5017509654408,0.254765446113684,0.211874831436568,1.  
20243374064916,0.229195523259376,0.68416563407269  
"5145","AL358472.4",10.5525631665052,-0.639172981234599,0.530757477840

83,-1.20426561644466,0.228486931734989,0.68416563407269  
"5146","XCL2",5.36587245929376,1.07229413367981,0.891094417664337,1.20  
334513652371,0.22884278915969,0.68416563407269  
"5147","PAPPA2",3.60999722926239,1.25614845714923,1.04471734961286,1.2  
0238115851595,0.229215885723239,0.68416563407269  
"5148","ACKR2",45.5435593453181,0.486441203874174,0.404092787669821,1.  
20378590936802,0.228672337230378,0.68416563407269  
"5149","KCNMB2",8.0319263974253,0.848490255410075,0.706745873175958,1.  
20055919335921,0.229922238199366,0.68416563407269  
"5150","UCHL1",80.01992947679,-0.296450908775597,0.247009212467164,-1.  
20016134545996,0.230076684432724,0.68416563407269  
"5151","FAM241A",55.183679350377,-0.436469695318154,0.362829494237893,  
-1.20296090105613,0.228991451211061,0.68416563407269  
"5152","SH3RF1",106.319331733,0.262616539744986,0.218260469496828,1.20  
322539555796,0.228889109988338,0.68416563407269  
"5153","MXD3",8.79722763126057,0.641326269844086,0.532977059064993,1.2  
032905712099,0.228863896484369,0.68416563407269  
"5154","GOPC",425.556264625738,0.182883886647338,0.152019161608387,1.2  
0303180673013,0.228964012385756,0.68416563407269  
"5155","Z94721.3",3.30957625499403,1.09862139132121,0.912228125403885,  
1.20432747108602,0.228463032876326,0.68416563407269  
"5156","SEM1",1152.430092415,-0.294905757726183,0.245071510745142,-1.2  
0334573704434,0.228842556869937,0.68416563407269  
"5157","LINC01004",11.711271302181,-0.630985793855275,0.52515968331418  
5,-1.2015122521844,0.229552556675564,0.68416563407269  
"5158","FLNC",222.822667829659,0.375318867476683,0.312522159552387,1.2  
0093521692746,0.229776332058007,0.68416563407269  
"5159","ADAM28",2.36954108851682,-1.15321519601615,0.960047190971896,-  
1.20120678114657,0.229670999609754,0.68416563407269  
"5160","AC113139.1",4.4591162622882,-1.19009274919876,0.98825434845289  
9,-1.20423730091533,0.228497872637096,0.68416563407269  
"5161","ANKRD46",63.5807400751862,0.33653171096127,0.279568162591659,1.  
20375549147495,0.228684097274813,0.68416563407269  
"5162","RNF121",77.6461803286015,-0.247249619754585,0.205251831485725,  
-1.20461590020833,0.22835161564366,0.68416563407269  
"5163","SLC35E3",158.639354849255,0.259738070207609,0.215997298525445,  
1.20250610531136,0.229167502103869,0.68416563407269  
"5164","ELK3",225.50053884305,-0.287550317072248,0.239499169343933,-1.  
20063179283645,0.229894062733352,0.68416563407269  
"5165","SH2B3",32.7229166243839,-0.500921714310773,0.416299215828757,-  
1.20327325938761,0.228870593450455,0.68416563407269  
"5166","SPART-  
AS1",5.0388208568739,0.833212768852561,0.693380586214454,1.20166728838  
13,0.229492459774464,0.68416563407269  
"5167","GNPNAT1",115.200439301773,-0.284068114804331,0.236321158538933  
, -1.20204266330021,0.229346999027666,0.68416563407269  
"5168","TLNRD1",248.209480931898,0.327121219570577,0.272359056392954,1.  
20106606294968,0.229725576120407,0.68416563407269  
"5169","ELOB",1801.21169824949,-0.281399044653326,0.23445807864786,-1.  
20021048656621,0.230057603655315,0.68416563407269

"5170", "AC009152.6", 4.16622259695924, -1.30166929582901, 1.0820195541164, -1.2029997894927, 0.228976402012504, 0.68416563407269  
"5171", "NUPR1", 3760.24820700557, 0.268524084806603, 0.223654461753142, 1.20062029034317, 0.229898526625303, 0.68416563407269  
"5172", "CDH11", 374.298478433961, 0.372619149802474, 0.310477781549543, 1.20014755304806, 0.230082040028078, 0.68416563407269  
"5173", "MIEF2", 36.7121682395617, 0.339916738897316, 0.283208607197529, 1.2002344923798, 0.23004828295591, 0.68416563407269  
"5174", "ERAL1", 81.5790669963559, -0.28762362802411, 0.239413789541864, -1.20136617266073, 0.229609191932951, 0.68416563407269  
"5175", "RETREG3", 144.002110658088, 0.230895405531648, 0.191970282908522, 1.20276639713906, 0.229066731660911, 0.68416563407269  
"5176", "DCAF7", 220.542509191374, 0.251173890177403, 0.208817770774675, 1.20283771465232, 0.229039127012486, 0.68416563407269  
"5177", "SCAMP4", 118.874330647299, 0.266422741900766, 0.221338588164699, 1.20368862975904, 0.228709948598154, 0.68416563407269  
"5178", "MAP1S", 88.5488544058705, 0.261576657054735, 0.217584491374158, 1.20218428897549, 0.229292135009306, 0.68416563407269  
"5179", "SIPA1L3", 31.2652085128569, 0.392490869388782, 0.32664406460028, 1.20158579911464, 0.229524046178827, 0.68416563407269  
"5180", "LYPD3", 3.0658727483447, -1.18252160980027, 0.984598182463666, -1.2010194928873, 0.229743640005869, 0.68416563407269  
"5181", "KDELRL1", 1265.8716695088, -0.253930616769418, 0.211378809512093, -1.20130592728544, 0.229632552053201, 0.68416563407269  
"5182", "TMEM86B", 7.52058221068381, -0.67759733064065, 0.562826170563825, -1.20391937347521, 0.228620742959428, 0.68416563407269  
"5183", "TGIF2", 20.8039864968595, 0.469484417879511, 0.390234848797612, 1.20308173225964, 0.228944693786239, 0.68416563407269  
"5184", "CHM", 172.290119082699, 0.201197664371856, 0.167488477649616, 1.20126272084674, 0.229649306373646, 0.68416563407269  
"5185", "TSPAN5", 32.8710201258697, -0.717664267884446, 0.598368264734368, -1.19936886726945, 0.230384547620617, 0.684642246913471  
"5186", "AC011978.2", 3.74831497848461, 0.96922919807059, 0.808408460996344, 1.19893499985891, 0.230553221130576, 0.684642246913471  
"5187", "GRINA", 628.651605971019, 0.165615620504519, 0.138133866667868, 1.19895015248309, 0.23054732880516, 0.684642246913471  
"5188", "CD81", 7919.1025289026, -0.265134993260712, 0.221094522737529, -1.19919295140326, 0.230452927399183, 0.684642246913471  
"5189", "ARRB2", 44.0830279911345, -0.373476630902201, 0.311483346901581, -1.19902599807433, 0.230517836717145, 0.684642246913471  
"5190", "AP001033.3", 2.45612099103062, -1.11128704571392, 0.926544309529206, -1.19938899228531, 0.230376725799945, 0.684642246913471  
"5191", "UQCRFS1", 459.059013323211, -0.281171004485829, 0.234477015021117, -1.19914100945249, 0.230473120372486, 0.684642246913471  
"5192", "MYL3", 18.1203634532626, 0.494136903002563, 0.41238428345236, 1.19824378093606, 0.230822125815743, 0.685308757598167  
"5193", "SP110", 207.745082936213, 0.218660800791338, 0.182533491748286, 1.19792153591666, 0.230947564843639, 0.68531787548737  
"5194", "MTDH", 1442.52244847369, -0.149520151544781, 0.124819260104524, -1.19789326919236, 0.230958570428601, 0.68531787548737

"5195", "B4GALNT1", 3.22544900682472, -1.01079706708328, 0.843741042917803, -1.19799442680632, 0.230919186660638, 0.68531787548737  
"5196", "PSMA7", 1607.88824867342, -0.255785246549245, 0.213554417162889, -1.19775207625017, 0.231013549160045, 0.685349087817956  
"5197", "SRRD", 85.4520789643772, -0.26354099562211, 0.220088171904431, -1.19743370732594, 0.231137552082237, 0.685585023157147  
"5198", "ANKRD13C", 99.9042142202964, 0.233345745844435, 0.194921630400184, 1.19712596988525, 0.231257459040857, 0.685676809216158  
"5199", "ATF3", 3206.56965870544, -0.328452229647531, 0.274363076248195, -1.19714443407977, 0.231250263397692, 0.685676809216158  
"5200", "PRUNE1", 45.1755021511837, 0.349980543699247, 0.292472898594476, 1.19662555190971, 0.231452536471244, 0.685793446846619  
"5201", "FAM89A", 28.4341894426152, 0.437342389668721, 0.365549629143261, 1.19639675382443, 0.231541767520938, 0.685793446846619  
"5202", "RBM34", 15.6677067314718, -0.475682880474395, 0.397484433756707, -1.19673335626912, 0.231410501333262, 0.685793446846619  
"5203", "EFHC1", 205.730642205477, -0.219057094073293, 0.183123439404909, -1.19622640763605, 0.231608218247389, 0.685793446846619  
"5204", "PSMD8", 863.711775748657, -0.305007113672883, 0.254934030478736, -1.19641584569983, 0.231534320772372, 0.685793446846619  
"5205", "RGS19", 31.036309278419, -0.383674025925648, 0.320715407325384, -1.1963068102194, 0.231576852136013, 0.685793446846619  
"5206", "THAP7-AS1", 41.0122301214924, -0.402167199654703, 0.336130322963946, -1.19646212251383, 0.231516271297628, 0.685793446846619  
"5207", "S100A1", 4.53303382677645, -1.15175825548758, 0.963039379095992, -1.19596174412799, 0.231711488293858, 0.685936831454473  
"5208", "CD74", 400.204945008275, -0.466057980941813, 0.389870200465987, -1.19541832226409, 0.231923630589732, 0.685936831454473  
"5209", "NUDT3", 189.147049773204, 0.243765300049084, 0.203902402973089, 1.19549988864651, 0.231891779722571, 0.685936831454473  
"5210", "METTL23", 181.283074638909, -0.296106601159946, 0.247699880086506, -1.1954248869904, 0.231921067013989, 0.685936831454473  
"5211", "KLF16", 26.3768190720748, -0.375848501762402, 0.314387777910059, -1.19549336256299, 0.231894327979462, 0.685936831454473  
"5212", "AC005261.1", 269.03500558262, 0.477007998452968, 0.399005796011904, 1.19549140193126, 0.231895093556342, 0.685936831454473  
"5213", "MTURN", 624.936967512609, 0.265129558896999, 0.221878799511446, 1.19492966196314, 0.23211451265593, 0.686369693572062  
"5214", "CHMP2B", 397.255970995774, -0.216015115800323, 0.180913555482941, -1.19402393714324, 0.232468604660302, 0.686713936340303  
"5215", "SEPTIN7", 1632.99590946915, -0.172148150171516, 0.1441449613214, -1.19427102129278, 0.232371969416981, 0.686713936340303  
"5216", "REEP4", 28.2900868071433, 0.370904623733293, 0.310635643053487, 1.19401823978528, 0.232470833247897, 0.686713936340303  
"5217", "TNFRSF10D", 27.6810658818207, 0.591433391472499, 0.49520649028048, 1.19431672056139, 0.232354099440447, 0.686713936340303  
"5218", "RCL1", 40.7302997604452, -0.408286638466268, 0.341826781507222, -1.19442554110595, 0.232311550813144, 0.686713936340303  
"5219", "CPAMD8", 2.84455350907328, 1.33087454061722, 1.11468362124577, 1.1

9394823360716,0.232498218213431,0.686713936340303  
"5220","SMIM13",66.0436431678777,-0.323026125828306,0.270640699200639,-1.19356078661632,0.232649820836619,0.686885884531718  
"5221","ATP6V1H",124.847592392033,0.20433590552265,0.171202087478891,1.19353629696743,0.232659405652052,0.686885884531718  
"5222","HYKK",40.601450261516,-0.315291674740894,0.264183336212301,-1.1934578435618,0.232690112813794,0.686885884531718  
"5223","AC018638.6",4.40107246072225,1.24147381662854,1.04033320700195,1.19334248707319,0.232735269298924,0.686887646226866  
"5224","FSD1L",25.089277420043,-0.386469723446182,0.323946144702832,-1.19300608994963,0.232866987998576,0.68703894823152  
"5225","LINC01550",29.668399571782,0.501127750561915,0.420062454351235,1.19298391315615,0.232875673338287,0.68703894823152  
"5226","ERICH2",10.5615383079022,-0.618803039719613,0.518990866434908,-1.1923197106923,0.233135908711043,0.687193054137891  
"5227","TNFRSF21",38.795391811632,0.645257869304901,0.541195815548674,1.19228170426766,0.233150805912499,0.687193054137891  
"5228","CDH5",6.61549665138935,1.04978616645263,0.880159611973378,1.19272249279757,0.232978073567156,0.687193054137891  
"5229","RAB8A",270.892997950085,-0.225037378496504,0.188717759764142,-1.19245469413029,0.233083005337079,0.687193054137891  
"5230","HSD17B10",239.719931094974,-0.364253976769967,0.305475932179307,-1.19241465005551,0.233098698719804,0.687193054137891  
"5231","CBLB",484.237547302927,0.309700666632577,0.259801151718674,1.19206810510193,0.233234541942248,0.687252923392567  
"5232","AL121832.2",10.1996913657046,-0.630218469047798,0.528750953008928,-1.19190039367581,0.233300303814626,0.687252923392567  
"5233","MCAT",73.0007636669779,-0.298132777371113,0.250134734855818,-1.19188875364696,0.233304868512053,0.687252923392567  
"5234","ADAR",333.602257769059,0.223336504893205,0.18749674260207,1.19114871967242,0.233595206669468,0.687319748507469  
"5235","SP5",66.3137425062245,-0.600499734301162,0.504152342687197,-1.19110769395699,0.233611309813275,0.687319748507469  
"5236","CCR1",15.1575353252497,0.742896044288725,0.623423467660477,1.19163952405673,0.233402620378022,0.687319748507469  
"5237","CD200",47.1829202209439,0.356359974319558,0.299249419677236,1.19084599964779,0.233714046860827,0.687319748507469  
"5238","CCDC112",92.1299138632545,-0.267020479051633,0.224360023008645,-1.19014285821028,0.233990247685349,0.687319748507469  
"5239","CUL7",44.3135794319448,0.328423331966294,0.275839848991903,1.19063048057256,0.233798680286549,0.687319748507469  
"5240","CDK5",24.9425810089718,-0.427188831360762,0.358868833342938,-1.1903759582057,0.233898658111252,0.687319748507469  
"5241","AJM1",3.52449879572521,-0.888764316443004,0.746186089475861,-1.19107596480027,0.233623764472686,0.687319748507469  
"5242","JCAD",17.6385767846574,-0.705810438677038,0.593054584031478,-1.19012727948086,0.233996369780551,0.687319748507469  
"5243","METTL15",88.3959321205559,0.263870900898362,0.221521080938548,1.19117738041176,0.233583957411582,0.687319748507469  
"5244","TCIRG1",152.458391387335,-0.215667747626839,0.181061726287625,

-1.19112830772551,0.233603218534163,0.687319748507469  
"5245","TRHDE-  
AS1",2.92769614474174,-1.16340837586114,0.977171893577175,-1.190587227  
80309,0.23381566808233,0.687319748507469  
"5246","SERPINA3",198.243259036852,-0.771731530005101,0.64844340959100  
1,-1.19012934450496,0.233995558265346,0.687319748507469  
"5247","MAPK8IP3",35.1598955135528,0.494511663960586,0.415380699024086  
1,1.19050226725126,0.233849039417473,0.687319748507469  
"5248","STAT3",1025.49920984426,-0.18213320837816,0.15297462001023,-1.  
19061062786742,0.233806477452067,0.687319748507469  
"5249","DCTN3",697.785798973335,-0.322082278768178,0.270716740246547,-  
1.18973905520158,0.234148969974622,0.687375047068901  
"5250","HPS6",32.6440586662616,-0.367505944434056,0.308892730846122,-1.  
18975264787676,0.234143625880175,0.687375047068901  
"5251","TRIP4",80.6189689916307,-0.295856783304124,0.248670217023893,-  
1.18975560018793,0.234142465161314,0.687375047068901  
"5252","RP2",62.0630059748937,-0.280827957710345,0.236127501747613,-1.  
18930643670008,0.234319103360086,0.687743522143133  
"5253","GMIP",10.1831314875391,-0.549982732940042,0.46254513297391,-1.  
18903582317245,0.234425570497242,0.687925027453832  
"5254","HEMK1",58.4676607030333,0.330943646897536,0.278388277840114,1.  
1887844181701,0.234524511150153,0.688084381305599  
"5255","FBXL22",3.48665691677772,-0.99242274462003,0.835437383788727,-  
1.1879079915234,0.234869660879588,0.688965676309486  
"5256","YPEL1",35.6589217398019,0.394878845569016,0.332447033523215,1.  
18779476352717,0.234914277955411,0.688965676309486  
"5257","MTRF1L",108.109130324442,-0.239505540854882,0.201667271433874,  
-1.18762721958786,0.234980309038641,0.689028241169993  
"5258","MOV10",44.5622184504767,0.326808495158746,0.275425832310616,1.  
18655716646862,0.235402339839791,0.689099994463742  
"5259","NPR3",44.6322762172271,1.21623744464934,1.02498407983395,1.186  
5915467159,0.235388771874946,0.689099994463742  
"5260","SRA1",177.643550869949,-0.373266136717852,0.314395214908026,-1.  
18725132895883,0.235128499871672,0.689099994463742  
"5261","TRBC1",17.0660928573254,0.716468290779296,0.60376563552266,1.1  
866662304473,0.235359300281349,0.689099994463742  
"5262","SARAF",873.563457377728,-0.219662628337054,0.185124390983304,-  
1.18656772978589,0.235398171029096,0.689099994463742  
"5263","CARS",92.1827721215128,-0.227054294319784,0.191357494370743,-1.  
1865450844579,0.235407108066563,0.689099994463742  
"5264","RPS2",16590.7264112148,-0.272113467868365,0.22928586443143,-1.  
18678693317242,0.23531167425599,0.689099994463742  
"5265","LINC01431",4.7037124228019,0.84416920947129,0.711365133359689,  
1.18668904319837,0.235350298464965,0.689099994463742  
"5266","FANCB",6.81577604543039,-0.666389718691065,0.561566227510431,-  
1.18666274082283,0.235360677294095,0.689099994463742  
"5267","FSBP",12.9584575198908,0.554656780229906,0.467686932529359,1.1  
8595740366359,0.235639121803272,0.689255609601031  
"5268","EIF2S1",222.037323313843,-0.22370582320774,0.188615723702271,-  
1.18604016047389,0.23560644000149,0.689255609601031

"5269", "ODF3L1", 6.35979735893477, -0.8041958502378, 0.677998869796749, -1.18613154986362, 0.235570352802452, 0.689255609601031  
"5270", "VASP", 85.7346215555842, -0.30759107069968, 0.259349801634282, -1.18600850573784, 0.235618940512994, 0.689255609601031  
"5271", "AC127070.1", 3.79534472233989, -1.05503383072258, 0.889757222842763, -1.18575472458854, 0.235719176103929, 0.689292406593316  
"5272", "IMPA2", 253.620837727498, -0.452585874245129, 0.381703804843554, -1.1856991429012, 0.235741133153419, 0.689292406593316  
"5273", "RFD3", 30.1558350516794, 0.370244047562762, 0.312317804545843, 1.18547211261668, 0.235830834468376, 0.68929319554987  
"5274", "MRPL54", 390.738273959108, -0.339407542713108, 0.286302122567118, -1.18548734347417, 0.235824815890352, 0.68929319554987  
"5275", "COG8", 58.2742114266967, 0.317893075762465, 0.268284601880155, 1.18490988127776, 0.236053080096527, 0.689801711224922  
"5276", "ULK2", 95.706505105206, 0.300757582591893, 0.253845507774814, 1.18480561357302, 0.236094312580129, 0.689801711224922  
"5277", "TPRG1-AS1", 2.96338022330282, -1.02038143654266, 0.86153580206976, -1.18437496630005, 0.236264665270268, 0.690168621402535  
"5278", "GPN2", 67.3599361406995, 0.271230001338976, 0.229275776710088, 1.18298585760299, 0.236814752362992, 0.691104837105737  
"5279", "TATDN2", 51.8042997238148, 0.322020116068908, 0.272185969564615, 1.18308859411088, 0.23677403772664, 0.691104837105737  
"5280", "BCL6", 428.239529144238, 0.351735881884896, 0.29735388926993, 1.18288643457291, 0.23685415857474, 0.691104837105737  
"5281", "SLC2A8", 37.5602093954744, -0.402888505607378, 0.340586293029212, -1.18292636507489, 0.236838331606042, 0.691104837105737  
"5282", "ARHGAP19", 38.5379829405005, 0.336998796836455, 0.284860652452236, 1.18303034812069, 0.236797120094813, 0.691104837105737  
"5283", "ST20-AS1", 12.3468124520832, -0.562004273916036, 0.475033518860947, -1.18308340696385, 0.236776093282383, 0.691104837105737  
"5284", "LUZP1", 204.421764664103, -0.260272209367718, 0.220096542764381, -1.18253656372216, 0.236992866365114, 0.691378697013291  
"5285", "SSH1", 68.6679737320578, 0.393795231245618, 0.333137516671862, 1.1820801066771, 0.237173917001361, 0.691618304485191  
"5286", "SACS", 122.670129685797, 0.281598863787313, 0.238241289844436, 1.18199017463005, 0.237209599468907, 0.691618304485191  
"5287", "ERVK3-1", 183.870384124838, -0.246932516706656, 0.208885908720676, -1.1821406155111, 0.237149910958958, 0.691618304485191  
"5288", "PCDHGA10", 42.4013287002369, 0.422693281055251, 0.357765339325667, 1.181481922905, 0.237411330534869, 0.692075578705562  
"5289", "GAS6-DT", 7.71360722746169, 0.758530814780889, 0.642165884422947, 1.1812069640892, 0.237520515418696, 0.692262950497107  
"5290", "HPGDS", 3.31577697618562, -1.31014192160277, 1.10981247539179, -1.18050747369754, 0.237798439733493, 0.692680073411149  
"5291", "CLDN23", 19.2845449354043, -0.730119402238322, 0.618425412104198, -1.18061028532784, 0.237757575814589, 0.692680073411149  
"5292", "AC105339.6", 3.17886963350121, 1.15600706808971, 0.97920220420145

8,1.18056011631677,0.237777515569355,0.692680073411149  
"5293","RCS1",5.42208081747678,-0.885333909541024,0.751071706357327,-  
1.17876083208468,0.2384934248808,0.693405481397708  
"5294","LIN9",16.1713784493488,0.435213729266517,0.369288519044304,1.1  
7851952287286,0.238589553921422,0.693405481397708  
"5295","MTHFD2",46.6364508774079,-0.573850218805312,0.486753183535122,  
-1.17893470082236,0.238424178681972,0.693405481397708  
"5296","AC009948.3",4.7605577148584,-0.783779994276853,0.6652273734814  
33,-1.17821368380405,0.238711428657965,0.693405481397708  
"5297","PIKFYVE",83.1123420381034,0.28125179769597,0.238586717040034,1  
.17882420775662,0.238468182791556,0.693405481397708  
"5298","TUSC2",127.796348486826,-0.26008561552727,0.220587689213452,-1  
.1790577092251,0.238375197053933,0.693405481397708  
"5299","PPM1M",98.6719850860531,0.311974250754716,0.264632416564475,1.  
17889657965885,0.238439359872626,0.693405481397708  
"5300","RAB6B",23.0645764946646,0.537280791090479,0.455988691644279,1.  
17827656899355,0.238686365761264,0.693405481397708  
"5301","SPRY1",1522.5400911294,0.320248065468885,0.27169375611998,1.17  
870969889887,0.238513792247523,0.693405481397708  
"5302","AC095055.1",2.68989399842517,-1.02564210009044,0.8695007873946  
31,-1.17957581517973,0.238168966568244,0.693405481397708  
"5303","CARMIL1",194.232292024637,0.243516804534587,0.206467542734498,  
1.17944351596091,0.23822161588643,0.693405481397708  
"5304","RPS12",20653.9561358699,-0.280829819373222,0.238357669479924,-  
1.17818663014271,0.238722211467897,0.693405481397708  
"5305","FMNL3",27.6920715218283,-0.474582886351423,0.40235203440459,-1  
.17952152784246,0.238190569566508,0.693405481397708  
"5306","MX1",103.436682204088,-0.476109752919421,0.404051472241277,-1.  
17833935928617,0.238661342538514,0.693405481397708  
"5307","RPL10",37007.2604544737,-0.305862230094889,0.259468738338147,-  
1.17880185510549,0.238477085481738,0.693405481397708  
"5308","ARHGAP39",5.70700120317949,0.836301849842543,0.709950440318168  
,1.17797215460244,0.238807707402065,0.693523136699856  
"5309","CD84",6.91220739895257,-0.850083019252419,0.721724849899938,-1  
.1778491753059,0.238856740125512,0.693534874559195  
"5310","C12orf65",104.425833930922,0.242846197205929,0.206198118942438  
,1.17773235978802,0.238903321884275,0.693539492814707  
"5311","DAP3",188.413757981467,-0.205926033184817,0.175406417785788,-1  
.17399372146292,0.240397540471387,0.694067716543761  
"5312","CNIH4",427.179251380482,-0.28447160233001,0.242597429704758,-1  
.17260765159884,0.240953179587885,0.694067716543761  
"5313","CMPK2",12.5401347851081,-0.650414982392778,0.55255741588585,-1  
.17709936324001,0.239155849236146,0.694067716543761  
"5314","HADHA",758.172342699873,-0.207351613214809,0.176536182795552,-  
1.17455588951385,0.240172439554502,0.694067716543761  
"5315","EDEM1",81.18525245426,-0.315173912477209,0.268918712978776,-1.  
17200439116368,0.24119529316712,0.694067716543761  
"5316","AC018809.2",7.35592053866749,0.751128602770103,0.6397729342260  
63,1.17405498511554,0.240373002327977,0.694067716543761  
"5317","RBM5-



AS1",7.40847694370854,0.845542905761938,0.721529120836922,1.1718763405  
9893,0.241246707231443,0.694067716543761  
"5318","PRICKLE2",126.675120092024,0.347120731234387,0.295789201349123  
,1.17354091917871,0.240578957673145,0.694067716543761  
"5319","PARP14",257.867619430899,0.229158902480777,0.194810580088267,1.  
.17631651410794,0.23946841905632,0.694067716543761  
"5320","CLCN3",189.037436327891,0.231912292202536,0.197834869281867,1.  
17225185349968,0.241095955495254,0.694067716543761  
"5321","HMGB2",267.715983615339,0.297996140214334,0.253843507840503,1.  
17393642543568,0.240420491045208,0.694067716543761  
"5322","CFAP97",359.979076287548,-0.190435034515865,0.161890162398059,  
-1.17632246268071,0.239466042871469,0.694067716543761  
"5323","SLC1A3",66.7033766956739,0.438719887193022,0.373528712926394,1.  
.17452787967996,0.240183651614526,0.694067716543761  
"5324","HOTAIRM1",52.517845584893,-0.546996384414551,0.466500364423274  
, -1.17255296272017,0.240975121458959,0.694067716543761  
"5325","LAMTOR4",1177.48098428154,-0.279916883689248,0.237959867835504  
, -1.17631971405677,0.239467140819922,0.694067716543761  
"5326","IFRD1",563.127906773474,0.358115018324491,0.304972878205217,1.  
17425202015346,0.240294095166163,0.694067716543761  
"5327","AC124067.2",4.0056273402288,-1.07333053976263,0.91523848963290  
3, -1.17273317492705,0.240902823359062,0.694067716543761  
"5328","SLC45A4",6.99507337123662,0.803275769232037,0.684695094767038,  
1.17318756242199,0.240720598578245,0.694067716543761  
"5329","ZNF251",45.5297522969689,0.31780454570575,0.27041800647071,1.1  
7523440784692,0.239900948049876,0.694067716543761  
"5330","ACER2",4.35962935429188,0.869901705527276,0.741634934180655,1.  
17295136115497,0.240815311168017,0.694067716543761  
"5331","TRMT10B",82.9627350201288,0.291058601213732,0.24745436507499,1.  
.17621122232185,0.239510481098158,0.694067716543761  
"5332","IDNK",52.9736797719147,-0.350228374550222,0.29879602231785,-1.  
17213198433297,0.241144070427504,0.694067716543761  
"5333","PTGES",904.65920486297,-0.309829136691974,0.264162154335577,-1.  
.1728748104408,0.240846012300588,0.694067716543761  
"5334","NTNG2",12.7787161458058,0.579622430655611,0.494633188579379,1.  
17182276490651,0.241268220898836,0.694067716543761  
"5335","NACC2",49.0177736301187,0.366258180348221,0.311949737272878,1.  
17409356888747,0.240357549141675,0.694067716543761  
"5336","CELF2",1552.62154738651,0.272963219313367,0.232138754459115,1.  
17586234125092,0.239649889600158,0.694067716543761  
"5337","LHPP",34.809452499233,0.432031501003861,0.36835077137157,1.172  
88067402485,0.240843660576822,0.694067716543761  
"5338","PSMA1",606.849582454434,-0.271811081187797,0.231225833254187,-  
1.17552211776007,0.239785893732159,0.694067716543761  
"5339","RCE1",54.4261208049456,-0.357700875149408,0.304241098730829,-1.  
.1757151701121,0.239708714496235,0.694067716543761  
"5340","ST3GAL4",243.525396763178,-0.353387228677666,0.300295832487624  
, -1.17679697966581,0.239276548433044,0.694067716543761  
"5341","MTERF2",100.844781773116,0.325958130477649,0.277157643724658,1.  
.1760748363176,0.239564972426007,0.694067716543761

"5342", "ACACB", 104.589474958272, 0.27814848793062, 0.237134026662468, 1.17295898798417, 0.240812252532473, 0.694067716543761  
"5343", "POSTN", 1517.47832027358, -0.788677963895911, 0.671452608672425, -1.17458470442949, 0.240160905613114, 0.694067716543761  
"5344", "NAXD", 70.2635815080482, 0.27937218498087, 0.238161351250012, 1.17303745345145, 0.240780786618771, 0.694067716543761  
"5345", "EVL", 271.881178304746, -0.169717239184509, 0.144729577411622, -1.17265069255208, 0.240935912001523, 0.694067716543761  
"5346", "BCKDK", 140.166455707208, -0.272872128995823, 0.232237907584649, -1.17496808266051, 0.240007485359364, 0.694067716543761  
"5347", "TXNDC17", 302.728545522083, -0.254783938323623, 0.217004429090074, -1.17409556750506, 0.240356748694421, 0.694067716543761  
"5348", "PSMD11", 347.413445903938, -0.209594076754505, 0.178462118697719, -1.17444574951795, 0.240216529634182, 0.694067716543761  
"5349", "NAT9", 73.1573403084687, -0.281814929091046, 0.240001082131145, -1.17422357677976, 0.240305484834597, 0.694067716543761  
"5350", "CYBC1", 170.080492542452, -0.241377420021307, 0.205890180077747, -1.17236004131018, 0.241052535210032, 0.694067716543761  
"5351", "SIN3B", 99.5852407345181, 0.280084557010472, 0.238552649662608, 1.17409954325221, 0.240355156411472, 0.694067716543761  
"5352", "MRPS12", 198.923686661008, -0.314773851671637, 0.267569401427072, -1.17641946348425, 0.239427297798891, 0.694067716543761  
"5353", "CYTH2", 218.569513918149, -0.254668127627105, 0.217337253298087, -1.17176472860738, 0.241291527275901, 0.694067716543761  
"5354", "CN0T3", 88.9743013877175, 0.239031509011024, 0.203919196077108, 1.17218738406873, 0.241121832388109, 0.694067716543761  
"5355", "PRELID3B", 98.5896513342387, -0.237709168259259, 0.202609127166324, -1.1732401772015, 0.240699504542915, 0.694067716543761  
"5356", "TFIP11", 53.9373587114326, 0.322483733550937, 0.274629370061703, 1.17425071280061, 0.240294618665182, 0.694067716543761  
"5357", "POLDIP3", 154.916090488137, 0.201577016732486, 0.171964643146837, 1.1722003607472, 0.241116623620979, 0.694067716543761  
"5358", "PPARA", 104.586856424635, 0.309760004160642, 0.263508616780292, 1.17552134706439, 0.239786201879041, 0.694067716543761  
"5359", "LMF2", 328.356626485581, -0.243245974881313, 0.207045978633955, -1.17484037355469, 0.240058584298774, 0.694067716543761  
"5360", "STIM2-AS1", 2.45986620587675, 1.20939965678329, 1.03225822912984, 1.17160573067339, 0.241355386224143, 0.694121880344246  
"5361", "C11orf24", 112.037887585834, -0.239978037930334, 0.204872437246481, -1.17135345855049, 0.24145673165466, 0.69425151645309  
"5362", "FMN1", 7.37368144474219, -0.718079256812872, 0.613077830440981, -1.17126932529327, 0.241490537218389, 0.69425151645309  
"5363", "ZXDC", 50.8670094323421, 0.342887254978127, 0.292869113740272, 1.17078667189949, 0.241684536440446, 0.694420713742679  
"5364", "HINT1", 1559.94750742944, -0.276716745646588, 0.236334902401475, -1.1708670316351, 0.241652228787388, 0.694420713742679  
"5365", "IP08", 79.5593340226604, 0.315654400651902, 0.26956849515358, 1.17096176417821, 0.241614146625931, 0.694420713742679  
"5366", "INPP5B", 41.8975144291164, 0.419497301328864, 0.358519464497159, 1

.17008236056926,0.241967826315091,0.694514333809666  
"5367","FGGY",32.9115833366739,0.379884508447582,0.324774724818624,1.1  
6968618373777,0.24212728019088,0.694514333809666  
"5368","NBAS",129.962424558266,0.198247602195474,0.169459121692788,1.1  
698845138291,0.242047446745049,0.694514333809666  
"5369","MRPS9",116.074326923708,-0.283111362888868,0.242036863191385,-  
1.16970348712958,0.242120314351015,0.694514333809666  
"5370","BCHE",26.6704004474377,0.630760175990687,0.538907546471133,1.1  
7044227738324,0.241823030491895,0.694514333809666  
"5371","TADA2B",55.7959709145632,0.2687720830893,0.229817746792085,1.1  
6950099303017,0.242201841387021,0.694514333809666  
"5372","KRBA1",13.4473926246671,0.552161835843202,0.4719826978295,1.16  
987728232925,0.242050357301994,0.694514333809666  
"5373","SGCA",30.7176440623817,1.41690535742535,1.21046016198943,1.170  
5510035924,0.241779301542752,0.694514333809666  
"5374","NXT1",180.337495279355,-0.321682277941616,0.274947298126018,-1  
.16997795626338,0.242009839953116,0.694514333809666  
"5375","TGM2",3.08868134807669,-1.43717578177728,1.2289078734316,-1.16  
947397998526,0.242212718687043,0.694514333809666  
"5376","PPP2R3B",45.5214800519541,-0.303331877468875,0.259211571033743  
, -1.17020963323195,0.241916617097038,0.694514333809666  
"5377","SIPA1",78.3766010488213,0.299015754122965,0.255848467100353,1.  
1687220858184,0.242515620628997,0.694865853530852  
"5378","KMT2D",57.3063447535531,0.35120174442005,0.30049933162581,1.16  
872720654626,0.242513556833862,0.694865853530852  
"5379","FANCM",35.6209172187332,0.374469181015948,0.320375129529407,1.  
16884597617174,0.242465692851097,0.694865853530852  
"5380","BCL2L13",108.294148672924,0.213476509275522,0.182631526955736,  
1.16889188210786,0.242447194607323,0.694865853530852  
"5381","MAPKAPK2",123.38331741488,-0.265793698240159,0.227498186770474  
, -1.1683332602045,0.242672364195897,0.694927455708667  
"5382","CTNBL1",214.270747534883,-0.259227172482967,0.221837226139174  
, -1.16854676284284,0.242586288094238,0.694927455708667  
"5383","WAS",12.0864043859939,-0.630887283942664,0.53997634368837,-1.1  
6836096861821,0.242661192010209,0.694927455708667  
"5384","FAM180A",138.850527457548,0.317859187627298,0.272088194301477,  
1.16822116609406,0.242717564852547,0.694927797585812  
"5385","SRSF7",1181.57149430752,0.183194923873774,0.156899273851969,1.  
16759574073373,0.242969869069685,0.695202061945033  
"5386","ADCK2",37.6830826333005,-0.30762148343015,0.263440501909205,-1  
.16770762734188,0.24292471911162,0.695202061945033  
"5387","LSM4",258.421716562101,-0.321564110497294,0.275401500097719,-1  
.16761931355928,0.242960356162121,0.695202061945033  
"5388","RBX1",916.44291981731,-0.302253311967052,0.258881239975338,-1.  
16753655844605,0.242993753471284,0.695202061945033  
"5389","APC",258.102812004286,0.242636499973393,0.207842179238128,1.16  
740740913518,0.24304588043824,0.695222164957408  
"5390","DNER",23.4859442371635,0.566699385857505,0.485567069856104,1.1  
6708776405584,0.243174928697591,0.695333245385526  
"5391","APRT",1115.24825166956,-0.325076227433334,0.278524160304315,-1

.16713834476031,0.243154504867199,0.695333245385526  
"5392","ENTPD4",92.836157928405,0.348792399434858,0.298904733409282,1.  
16690155909062,0.24325012622937,0.695419268513675  
"5393","ACTN4",408.622337389349,-0.189931689731125,0.162783370705222,-  
1.16677575177544,0.243300941855872,0.695435568089797  
"5394","DENND6B",25.8575328924194,-0.419248974019859,0.359396592268532  
, -1.16653575197677,0.24339790237836,0.69558373473534  
"5395","FHL3",114.866264685897,-0.349664568731074,0.299890106734939,-1  
.16597567201551,0.243624281703176,0.696101631594895  
"5396","RADX",3.893675363067,0.94516829647576,0.810709154890904,1.1658  
537353053,0.243673587035743,0.696113481126014  
"5397","FAM86C1",6.46413370253565,-0.705976504299102,0.605720197614926  
, -1.16551587198007,0.243810239311864,0.696374808040092  
"5398","DUSP11",143.006011699818,-0.292546693205372,0.251054084864223,  
-1.1652735838319,0.243908268367916,0.696397652622819  
"5399","FGF18",187.895340099929,-0.402227938606498,0.345179208721492,-  
1.1652727871308,0.243908590756445,0.696397652622819  
"5400","EPA4",20.9755246619963,0.519194110136187,0.445648732334637,1.  
1650299270824,0.244006879071581,0.696549266831189  
"5401","AL606760.1",3.98077014562856,-0.98574323932943,0.8461962632058  
51,-1.16491088674263,0.244055066253404,0.696557831197226  
"5402","LINC01119",10.3923511135858,-0.580097805121625,0.4981239925838  
25,-1.16456507568044,0.244195087465986,0.696570553902327  
"5403","CRIP3",2.90097375308747,1.35946385815344,1.16734227077411,1.16  
458033962218,0.244188905804095,0.696570553902327  
"5404","CCDC43",124.661944086397,0.218627899357768,0.187717118231257,1  
.16466682110702,0.244153884206393,0.696570553902327  
"5405","AL356966.1",5.02289609053309,0.81546559010372,0.70037377848561  
, 1.16432912703695,0.244290657019483,0.696585364031692  
"5406","AMMECR1",87.0341691791425,0.326583142309884,0.28048920585173,1  
.1643340830824,0.244288649333638,0.696585364031692  
"5407","ZNF346",64.8571525137518,0.304882597686556,0.262033184103484,1  
.16352666830988,0.244615884541332,0.697086254182997  
"5408","UBN2",139.739649449413,0.304269009673712,0.26156788412532,1.16  
325064405817,0.244727824293126,0.697086254182997  
"5409","HSPA14.1",63.5467864481974,-0.309038293649326,0.26557638679161  
6,-1.16365124694543,0.244565374298513,0.697086254182997  
"5410","GLTP",262.901192230773,-0.196294378739249,0.168718324963241,-1  
.16344433114788,0.244649272053478,0.697086254182997  
"5411","SMG8",27.573180397905,0.352788586895492,0.303284534843364,1.16  
322643051251,0.244737645646343,0.697086254182997  
"5412","FKBP8",1080.81741829714,-0.267316543250926,0.229702354019861,-  
1.16375186659085,0.244524583541497,0.697086254182997  
"5413","MRPL20",710.354035516495,-0.269492040856792,0.232056678167026,  
-1.16131991109009,0.245511825182408,0.697687962178846  
"5414","ZNF644",312.369606277101,0.164123939191754,0.141332967433701,1  
.16125729312762,0.245537281532289,0.697687962178846  
"5415","MZT2B",1739.60576888437,-0.299611491942182,0.257888897845082,-  
1.1617851502943,0.24532274745234,0.697687962178846  
"5416","GK5",127.262970962263,0.371721838104697,0.319920793645977,1.16

191834193823,0.245268635887519,0.697687962178846  
"5417","UTRN",596.803471017761,0.339771156730919,0.292422029709899,1.1  
6192051969543,0.245267751203019,0.697687962178846  
"5418","SLC26A7",2.87042899739397,-1.07005930982091,0.920987110187444,  
-1.1618613311571,0.24529179654507,0.697687962178846  
"5419","FKBP15",114.493884245462,0.250820984269933,0.215831571666323,1  
.16211443179269,0.245188986001801,0.697687962178846  
"5420","DCTN2",602.839404442622,-0.23842258306463,0.205123874918982,-1  
.16233462905671,0.245099565541562,0.697687962178846  
"5421","LIG4",30.5915877552399,0.458525586183977,0.394804354546829,1.1  
6139951574316,0.245479465832513,0.697687962178846  
"5422","ZDHC1",124.723529041483,-0.274700204380838,0.236554037492205,  
-1.16125772907127,0.245537104299842,0.697687962178846  
"5423","VPS4A",194.702473361731,-0.187956947179927,0.161709122265589,-  
1.16231505400932,0.245107513894995,0.697687962178846  
"5424","KRBA2",28.1627627096739,0.450335603001377,0.387498965900922,1.  
16215949623081,0.245170683808421,0.697687962178846  
"5425","ZNF846",46.5086781363694,-0.342382987378824,0.294727345202706,  
-1.1616939959994,0.245359785394416,0.697687962178846  
"5426","ZNF24",225.857101591096,-0.194383037209871,0.167407330234588,-  
1.16113814692273,0.245585723664078,0.697697001526311  
"5427","AC105942.1",15.8937566640575,-0.446143182623467,0.384525157490  
692,-1.16024445717642,0.245949291240511,0.69826321928839  
"5428","SDHAF3",124.921142543587,-0.349137667030627,0.300928119507024,  
-1.16020286705868,0.245966219963409,0.69826321928839  
"5429","NAGPA",56.1022667908066,0.330264664915373,0.284641400272905,1.  
16028330593767,0.245933479089424,0.69826321928839  
"5430","FCGRT",2886.12888350603,0.313207748507969,0.269901243941522,1.  
16045314921124,0.245864358162993,0.69826321928839  
"5431","MAGIX",3.38187864980799,-0.925212539731458,0.797732307435037,-  
1.15980327123307,0.246128911938517,0.69859642377688  
"5432","ZNF672",49.2599820327181,-0.291801508167142,0.251719320612573,  
-1.15923365539454,0.246360956466625,0.698611873424028  
"5433","THUMP3-  
AS1",175.397260994156,-0.353026906956425,0.30446289670234,-1.159507154  
33666,0.246249522015636,0.698611873424028  
"5434","ATF6B",129.980178420062,0.221544117461192,0.191079185096822,1.  
15943616437831,0.246278442779743,0.698611873424028  
"5435","PARG",52.4520324192693,0.27657397963593,0.23853160576335,1.159  
4856738202,0.246258272761982,0.698611873424028  
"5436","ZNF792",7.32932540665974,-0.654621973390632,0.564686717882778,  
-1.15926575331018,0.246347876656837,0.698611873424028  
"5437","SLC23A3",3.21519118146883,1.04688400734846,0.903718008990333,1  
.15841888391499,0.246693136528168,0.699167990362515  
"5438","CUL1",135.099414740863,-0.196502874412216,0.16960809816011,-1.  
15857011866684,0.246631454835566,0.699167990362515  
"5439","SS18",211.76123140712,0.170769455481933,0.147410585406521,1.15  
846128017872,0.246675843953934,0.699167990362515  
"5440","EMC1-  
AS1",25.2050908396733,-0.44914584096174,0.387971159376905,-1.157678425

58989,0.246995291387285,0.69927991862676  
"5441","SKP2",32.3026375709061,0.319810752330337,0.276158888827689,1.1  
5806792853184,0.246836316711004,0.69927991862676  
"5442","ZFP62",44.9788965537539,0.347326177447241,0.30003496111041,1.1  
5761901933631,0.247019544206455,0.69927991862676  
"5443","ADRB1",4.46481589279489,-0.950124854268399,0.820811006635094,-  
1.15754399805556,0.247050174300443,0.69927991862676  
"5444","TBC1D15",209.940257777653,0.205100427202595,0.177144589256619,  
1.15781367109937,0.246940083136829,0.69927991862676  
"5445","MRPS23",173.806503006471,-0.287198554550997,0.248078654524034,  
-1.15769151965944,0.246989945910082,0.69927991862676  
"5446","TRABD",86.1028966064497,-0.245475483314314,0.211999009733498,-  
1.15790863185115,0.246901324597877,0.69927991862676  
"5447","PYURF",657.011300368215,-0.257847491839625,0.222809676949078,-  
1.15725445757257,0.247168414398575,0.699486158978158  
"5448","LLPH",231.188959313062,-0.249161447134993,0.21533085677669,-1.  
15710981168568,0.247227498507126,0.699524943004284  
"5449","MCM6",77.8307548880693,0.26977871972488,0.233219338239049,1.15  
675964850032,0.247370572074331,0.699544554857057  
"5450","MARF1",168.419945712284,0.300676612611682,0.259928374241509,1.  
15676718053225,0.247367493943009,0.699544554857057  
"5451","SAMD4B",547.177146990545,0.235216754981121,0.203340788912202,1.  
15676129830834,0.247369897841526,0.699544554857057  
"5452","SNAP47",85.1191948772474,-0.307116167241269,0.265555338204085,  
-1.15650534204379,0.247474515767974,0.699655563135511  
"5453","OXR1",323.16775108247,0.200277792428857,0.173200527097035,1.15  
633477441239,0.247544249687897,0.699655563135511  
"5454","RAB3IL1",276.24872075531,0.224244358933297,0.193927562748285,1.  
15633051720638,0.247545990356216,0.699655563135511  
"5455","PPIH",115.545365764312,-0.364561086411528,0.315424631206091,-1.  
15577875138525,0.247771666552499,0.700095704667408  
"5456","DDAH2",2202.91565530243,-0.269119870457157,0.232857504666954,-  
1.15572770927897,0.247792550416178,0.700095704667408  
"5457","AC124016.2",10.4885880262836,-0.605694712666024,0.524253539606  
684,-1.15534692072931,0.247948388826556,0.700331750329202  
"5458","TEX9",11.4315623638851,-0.607330308081815,0.525689857011397,-1.  
15530155277211,0.247966960317664,0.700331750329202  
"5459","PRRG3",270.90081546918,0.324364035428718,0.280827907787235,1.1  
5502778190573,0.248079049793807,0.700519976657179  
"5460","BTBD7",269.105859950673,0.266775035019727,0.231178319048422,1.  
15397947401741,0.248508584247956,0.701604363769642  
"5461","ALG6",59.0643280206191,0.34601632154084,0.300296986098624,1.15  
224706726561,0.249219561537568,0.701829745757099  
"5462","CD46",463.153438324885,0.203519543688228,0.176518541253659,1.1  
5296411494682,0.248925113904919,0.701829745757099  
"5463","COX5B",1395.62499726096,-0.276850444520899,0.24017153255455,-1.  
15271964822899,0.249025474095698,0.701829745757099  
"5464","STK39",51.604428218254,0.316649209260458,0.274661024056149,1.1  
5287274686533,0.248962619660107,0.701829745757099  
"5465","STK32B",31.0573221927279,0.460603632337458,0.399702283496264,1

.15236677736359,0.249170386998264,0.701829745757099  
"5466","THBS2",1202.19588406443,0.268106919261419,0.23269211324452,1.1  
5219598775006,0.249240546056455,0.701829745757099  
"5467","ERICH1",265.622249000321,0.241869338528437,0.209864620367251,1  
.15250173233192,0.249114958301789,0.701829745757099  
"5468","GTF3C4",78.399382265369,0.310113146465498,0.269041976687515,1.  
15265710683388,0.24905115357132,0.701829745757099  
"5469","BBS1",76.9908923381258,0.253220888563912,0.219699414234938,1.1  
5257880611883,0.249083306428136,0.701829745757099  
"5470","TCP11L2",123.839386478235,-0.33203347046822,0.288039344281851,  
-1.1527365169368,0.249018548126992,0.701829745757099  
"5471","KNSTRN",16.5178571803952,-0.426585445080308,0.370120892541608,  
-1.15255705278067,0.249092239581525,0.701829745757099  
"5472","AC139530.1",31.8756847455705,-0.450811970151561,0.390912431497  
283,-1.15323006849603,0.248815964911236,0.701829745757099  
"5473","ZNF550",15.9011678037448,0.514149986692647,0.446263874464943,1  
.15212101205615,0.249271349855343,0.701829745757099  
"5474","IFNAR1",396.343056423936,0.188465048016248,0.163563996541883,1  
.15224041965732,0.24922292442302,0.701829745757099  
"5475","DNAL4",88.5554488849974,-0.313345763481563,0.271749677143838,-  
1.15306765687787,0.248882615672177,0.701829745757099  
"5476","LRRC2",69.6447070000384,-0.514102712485841,0.446313219174392,-  
1.15188771113893,0.249367218669144,0.701954113930257  
"5477","KIAA0513",31.6325066758695,0.410426456981697,0.35633733509059,  
1.15179190212374,0.249406596302045,0.701954113930257  
"5478","AC009060.1",2.91427203337973,1.04736109597318,0.90963515645225  
4,1.15140788979406,0.249564469497405,0.702142050976912  
"5479","FKBP1A",1470.449707656,-0.294884574719405,0.256099688711152,-1  
.15144448711923,0.249549420781458,0.702142050976912  
"5480","BECN1",181.309839659671,-0.212700024428296,0.18475689732197,-1  
.15124267354214,0.24963241384342,0.702205047335095  
"5481","MAU2",115.945540404584,0.309595309519519,0.268959825144767,1.1  
5108384441014,0.249697743703437,0.702260667613297  
"5482","RPL7A",15122.2362684408,-0.293323941642975,0.254919923127,-1.1  
5065130274986,0.249875718012724,0.702504868350563  
"5483","ARMCX3",486.167221626978,0.133315041839327,0.115853226265303,1  
.15072360206903,0.24984596344809,0.702504868350563  
"5484","OIP5-  
AS1",342.169470887223,0.199978531827619,0.173849501456235,1.1502968380  
8418,0.250021632686255,0.702658790858455  
"5485","CPNE1",430.531695825011,0.244959262489772,0.212936024720484,1.  
15038900914641,0.249983684927319,0.702658790858455  
"5486","ARHGAP42",89.5497979935357,0.28215732501495,0.245335453832258,  
1.15008785158246,0.250107689447904,0.702673906166044  
"5487","MT-  
ATP8",447.710491369215,-0.426211036592295,0.370598189382556,-1.1500623  
8239424,0.250118178600914,0.702673906166044  
"5488","PRDM2",395.838493494236,0.318328686770687,0.277074264712624,1.  
1488930128565,0.2506000991203,0.702718474370203  
"5489","TSNAX",260.19801468511,-0.197045502439189,0.171365476084669,-1

.14985530890616,0.25020347052042,0.702718474370203  
"5490","PID1",380.726747081363,0.385909427116893,0.335878062641442,1.1  
4895692824351,0.25057374157761,0.702718474370203  
"5491","KIF9",49.233885844016,-0.304195942452523,0.264651947545843,-1.  
14941886985294,0.250383302806173,0.702718474370203  
"5492","ZBTB49",11.7183522927575,0.512904073011986,0.446179646659327,1.  
.14954610066202,0.250330868740577,0.702718474370203  
"5493","GRPEL2",29.7683820947559,0.337230248130603,0.293494326265385,1.  
.14901794668995,0.250548580486426,0.702718474370203  
"5494","HIF1A-  
AS3",4.1628329309631,1.21233699540902,1.05534273770114,1.1487613948525  
,0.250654382087244,0.702718474370203  
"5495","MT1M",2043.69635326364,-0.541636179587354,0.471118505238488,-1.  
.14968139345995,0.250275120599421,0.702718474370203  
"5496","PRAM1",2.66259046480432,-1.19720431103173,1.04159738594621,-1.  
14939258410692,0.250394136582597,0.702718474370203  
"5497","CHRD1",1776.03504539763,0.239377361960465,0.208294674891747,1.  
.14922458812195,0.250463384537657,0.702718474370203  
"5498","UBE2A",329.703632617093,-0.22287518253896,0.194023054401183,-1.  
.14870463835766,0.250677792595025,0.702718474370203  
"5499","DCAF12L2",32.3631332072111,-0.378482796252941,0.32948889709000  
8,-1.14869666199875,0.250681082748086,0.702718474370203  
"5500","UBA52",7757.77420267614,-0.259736348604869,0.226164028483387,-  
1.14844235109629,0.250785998769749,0.702884758370123  
"5501","STAU2",90.1638267106731,0.256404753646631,0.223308726597304,1.  
14820749530765,0.250882915798994,0.703000575748314  
"5502","OGN",2745.04465406049,0.342408509455143,0.298245447029887,1.14  
807623340124,0.250937094528674,0.703000575748314  
"5503","PSMF1",328.568324766649,-0.172693059478632,0.150428089099343,-  
1.14801072401169,0.250964136772168,0.703000575748314  
"5504","QRSL1",56.523352864805,-0.262614609718141,0.228848393957689,-1.  
.14754840607138,0.251155039214059,0.703279732876424  
"5505","FKRP",34.9795638968814,0.324922115602821,0.283139938794175,1.1  
4756723119524,0.251147263879189,0.703279732876424  
"5506","ARHGAP5",263.49350065549,0.274862170420579,0.239545036022346,1.  
.14743421523015,0.251202207020271,0.703284057613054  
"5507","DIAPH1",273.422692421747,-0.421335354900652,0.367264343138516,  
-1.14722641272513,0.251288058030684,0.703333240837445  
"5508","AL110292.1",24.5419447403093,-0.485122823854132,0.422897983856  
699,-1.14713912662804,0.251324125296494,0.703333240837445  
"5509","LINC00653",4.65517799070178,-0.747483892882957,0.6516517225411  
17,-1.1470604113009,0.251356654153324,0.703333240837445  
"5510","YBEY",177.2956160959,0.358508670883259,0.312672617514192,1.146  
59439554852,0.251549293840942,0.703744530772799  
"5511","TICAM2",71.4642506063228,0.243840418827347,0.212780482282287,1.  
.14597173674912,0.251806846683741,0.704337242175625  
"5512","ATP2A2",232.486513542354,0.261365905721607,0.228115377827364,1.  
.14576188686151,0.251893689148463,0.704452325512257  
"5513","FBX028",72.5137299601864,0.248562424771916,0.217047777979134,1.  
.14519681835127,0.252127636046642,0.704467556581293



"5514", "WNT9A", 27.296440007414, -0.449805898662659, 0.392759370139597, -1.14524549345006, 0.25210747786021, 0.704467556581293  
"5515", "HEATR1", 80.5246287516837, 0.246122031896427, 0.214845032284661, 1.14557934749138, 0.251969246647476, 0.704467556581293  
"5516", "LINC00944", 3.58893273730037, -0.970224664253762, 0.847063479414993, -1.14539782180649, 0.252044400227786, 0.704467556581293  
"5517", "ELM03", 2.87832755555283, -1.05586816554523, 0.921739455057461, -1.14551694597842, 0.251995079780416, 0.704467556581293  
"5518", "FGD4", 162.502367043679, 0.30878960909305, 0.269674390648997, 1.14504609929745, 0.252190061593914, 0.704480812050799  
"5519", "CSNK1G2", 157.165579071553, -0.206239807176514, 0.180127656268138, -1.14496469586828, 0.252223782141314, 0.704480812050799  
"5520", "AP000254.2", 8.50410339591233, 0.599106302955994, 0.523341848274644, 1.14477048783913, 0.252304243547738, 0.704577883023257  
"5521", "LRRC58", 364.61133725748, 0.242261162209483, 0.211723498601477, 1.14423370013116, 0.252526730579608, 0.704816141930953  
"5522", "DCAF13", 145.679079627181, -0.233287706946877, 0.203854174703133, -1.14438523168146, 0.252463910144095, 0.704816141930953  
"5523", "FEM1B", 160.618358959374, 0.21919396709219, 0.191555250369089, 1.14428587402249, 0.252505099619627, 0.704816141930953  
"5524", "RPS23", 18047.5509107255, -0.28551149013068, 0.249563888711222, -1.144041678486, 0.252606352642199, 0.704888608144312  
"5525", "ZNF836", 40.22975070582, 0.349220452025631, 0.305275831093247, 1.14395054064716, 0.252644149205146, 0.704888608144312  
"5526", "EPB41", 8.632454516463, -0.650696326698996, 0.569033973490347, -1.14351050554635, 0.252826695423716, 0.705085203324963  
"5527", "SNRPE", 673.601710356335, -0.237817323707669, 0.207991498290519, -1.14339925267277, 0.252872862636581, 0.705085203324963  
"5528", "ADAMTS12", 52.9899050314114, -0.325613905810529, 0.284791914841304, -1.14333971170485, 0.252897573090089, 0.705085203324963  
"5529", "SLC20A2", 64.4455313718576, 0.283647623440634, 0.24802507120783, 1.14362480397377, 0.252779270497058, 0.705085203324963  
"5530", "PIGC", 211.191983327153, -0.247625232885425, 0.216686476445844, -1.14278120604039, 0.253129443770853, 0.705153158884231  
"5531", "LYST", 199.321327631608, 0.251420003569019, 0.219982111790696, 1.14291112819317, 0.25307549173575, 0.705153158884231  
"5532", "AC064836.4", 30.1182045560554, -0.399772250079889, 0.349919116300151, -1.1424704494766, 0.253258522382327, 0.705153158884231  
"5533", "QRICH1", 134.902717083769, 0.205867880490988, 0.180189706106946, 1.14250633367925, 0.25324361485991, 0.705153158884231  
"5534", "CREB3", 174.397180528831, -0.241758365822118, 0.211623269657711, -1.1423997285986, 0.253287904037755, 0.705153158884231  
"5535", "TMEM72-AS1", 11.7209045203733, 0.582325433516852, 0.509652215966588, 1.14259374387774, 0.253207304237917, 0.705153158884231  
"5536", "SLC22A17", 98.9984833948178, 0.290424088169502, 0.254160601439384, 1.14267941815037, 0.253171718246991, 0.705153158884231  
"5537", "PIAS1", 227.634179039967, 0.229435307484954, 0.200762563782473, 1.14281917486144, 0.253113675845528, 0.705153158884231  
"5538", "WWC2-

AS2",8.08864404229663,0.701764145352357,0.61443289628583,1.14213309475  
198,0.253398700930143,0.70533423164286  
"5539","AG04",62.7926200213957,0.325871711329854,0.28541320929956,1.14  
175413299751,0.253556232570438,0.705417141253294  
"5540","TAF1A",27.2505571056852,0.38017766709115,0.333138067899664,1.1  
4120151289841,0.253786074917138,0.705417141253294  
"5541","AC023481.1",4.29531846612122,0.868324455423062,0.7606793182314  
1,1.14151184948991,0.25365698378583,0.705417141253294  
"5542","RFC1",458.710721000916,0.177953085251326,0.155854134244234,1.1  
4179252359428,0.253540270775751,0.705417141253294  
"5543","AC093827.4",44.4981444956421,-0.377999881518063,0.331235675098  
893,-1.14118106814795,0.253794580953018,0.705417141253294  
"5544","TAF2",99.1970433809532,0.244588424005384,0.214305691288796,1.1  
4130624592596,0.253742503866381,0.705417141253294  
"5545","AC083805.1",8.77471403618639,-0.549813228964502,0.481621355533  
02,-1.14158814315036,0.253625254810931,0.705417141253294  
"5546","AC100830.1",2.50893110637595,1.29976007526604,1.13864339440366  
,1.14149880608296,0.25366240854894,0.705417141253294  
"5547","NKAPL",8.08762506858158,0.788212619031266,0.690836904826125,1.  
14095326049446,0.253889373724782,0.705553397506311  
"5548","ORAI2",91.0779569338038,-0.330352615964251,0.289601407149239,-  
1.14071481632688,0.25398861883799,0.705701975376283  
"5549","ZNF85",32.1536766946646,0.385608608297477,0.338089794356847,1.  
14055086765049,0.254056873138119,0.705764407897659  
"5550","RHOC",747.372955196134,-0.283252316156976,0.248478837027181,-1  
.13994543577967,0.254309034136916,0.705956016787423  
"5551","COMTD1",95.6103284508287,-0.33508998007958,0.293893473893194,-  
1.14017496081372,0.254213416993873,0.705956016787423  
"5552","RPL23A",11624.5564792032,-0.272792277596618,0.239301107952024,  
-1.13995409353186,0.254305426975901,0.705956016787423  
"5553","THAP8",27.608972975376,0.45236806882417,0.396799500969093,1.14  
004192978913,0.254268832939671,0.705956016787423  
"5554","PKN2",325.530490298192,0.199857686991653,0.175494212619752,1.1  
3882779385261,0.254774986804086,0.706105073999459  
"5555","AC009126.1",4.56147603927862,-0.794388959557337,0.697503003881  
715,-1.13890399774114,0.254743198024794,0.706105073999459  
"5556","FAM50B",73.9632265579701,-0.34242680542725,0.300651188746399,-  
1.13895044571432,0.254723823406598,0.706105073999459  
"5557","POLD2",240.564151618777,-0.327540885134212,0.28741708566882,-1  
.13960130230958,0.254452442544826,0.706105073999459  
"5558","LRATD2",4.12593283650952,0.867012489664533,0.760989816552082,1  
.13932206556038,0.254568848322354,0.706105073999459  
"5559","RMI1",17.4161418464962,0.462712183263819,0.406052614621354,1.1  
3953750475243,0.254479034648971,0.706105073999459  
"5560","SUFU",40.5240485029862,0.326113193514032,0.286249346304514,1.1  
3926266635771,0.254593614920664,0.706105073999459  
"5561","KNTC1",13.1976235071739,0.516837808933066,0.453814321564186,1.  
1388750516988,0.254755272665701,0.706105073999459  
"5562","ZNF519",54.9648363803246,0.333021537256959,0.292389319851327,1  
.13896614769067,0.254717273949024,0.706105073999459

"5563", "XP06", 90.3550156880113, 0.272052800844887, 0.238931457365716, 1.13862278263542, 0.25486052180867, 0.706215161546044  
"5564", "0AZ3", 6.2391568881694, -0.689676433326594, 0.605986009459883, -1.13810619809739, 0.255076140330605, 0.70643167502628  
"5565", "POLR3H", 76.628636184616, -0.315258790194252, 0.276966610313282, -1.13825558191891, 0.255013775609064, 0.70643167502628  
"5566", "LINC00893", 13.3316638824779, 0.557549002028205, 0.489882028318429, 1.13812912047835, 0.255066570011854, 0.70643167502628  
"5567", "ADH5", 1225.70640624625, 0.239375106918292, 0.210355841257579, 1.1379532200638, 0.255140016552512, 0.7064816517257  
"5568", "RPAP2", 125.301889715481, 0.240753230724979, 0.211800857145199, 1.13669620590785, 0.255665305971792, 0.70651156247698  
"5569", "LIX1L", 165.214633159046, 0.189446085686738, 0.166599902317681, 1.13713203339995, 0.25548309443601, 0.70651156247698  
"5570", "OPN3", 31.4246679306801, -0.342995316733531, 0.301534498748136, -1.13749941767037, 0.255329567891904, 0.70651156247698  
"5571", "DGUOK", 358.220912466216, -0.266346363089019, 0.234457989566139, -1.13600890113358, 0.255952839051842, 0.70651156247698  
"5572", "FRZB", 25.8956797796197, 0.727204116756596, 0.640478996464499, 1.13540665778398, 0.256204971407481, 0.70651156247698  
"5573", "NDUFB4", 990.279761665153, -0.26883679942929, 0.236734366436171, -1.13560529244821, 0.256121792897797, 0.70651156247698  
"5574", "TXNDC15", 444.269644770514, -0.207544834653795, 0.182734447856751, -1.13577290482468, 0.256051619603614, 0.70651156247698  
"5575", "ZNF76", 51.8348974653126, 0.272731980039449, 0.239915880122967, 1.13678169156482, 0.255629558857895, 0.70651156247698  
"5576", "AMD1", 541.270432445731, 0.316076438268335, 0.278179666069954, 1.13623128078977, 0.255859782229301, 0.70651156247698  
"5577", "SULF1", 175.786909682863, 0.407623483095779, 0.358985810352857, 1.13548633773328, 0.256171603077375, 0.70651156247698  
"5578", "FZD8", 60.4258091888846, 0.415566668631443, 0.36578754350043, 1.13608753500638, 0.255919931294062, 0.70651156247698  
"5579", "NFKB2", 79.5702016386484, -0.340470597925037, 0.299308816517704, -1.13752278294448, 0.255319805926012, 0.70651156247698  
"5580", "ARAP1", 254.774970978257, 0.249037605889651, 0.219192541969774, 1.13615912134453, 0.255889975439398, 0.70651156247698  
"5581", "CCDC153", 3.91055874173466, -0.923328860941878, 0.812886106489083, -1.1358649798184, 0.256013076788406, 0.70651156247698  
"5582", "A2M-  
AS1", 15.6696345605279, 0.438705742562292, 0.386321652428267, 1.13559708549795, 0.256125229196747, 0.70651156247698  
"5583", "DECR2", 35.7357181764694, 0.429794702956498, 0.378368824680178, 1.13591468144816, 0.255992273241049, 0.70651156247698  
"5584", "NHLRC4", 16.7935373686227, 0.550891148587786, 0.484897893305197, 1.13609722004103, 0.255915878374193, 0.70651156247698  
"5585", "MIR193BHG", 64.5387792512442, -0.301963126274161, 0.265660129246853, -1.13665203404902, 0.255683778460497, 0.70651156247698  
"5586", "AC127024.5", 3.78089262050467, 0.893138203382128, 0.786146998822116, 1.1360956725909, 0.255916525936398, 0.70651156247698  
"5587", "IGFBP4", 7195.32984741065, -0.342179164539948, 0.301214208859264,

-1.13599941329403,0.255956809848948,0.70651156247698  
"5588","IGFLR1",14.5828652901822,-0.474913236220157,0.417428661525064,  
-1.13771113484415,0.25524112234586,0.70651156247698  
"5589","TBCB",518.991842174635,-0.309847654434419,0.272627205811995,-1  
.13652507097216,0.255736879058474,0.70651156247698  
"5590","ZFP14",75.1315920089112,0.318447827289602,0.280281762982553,1.  
13617034480201,0.255885279118084,0.70651156247698  
"5591","HOXD4",9.72662673678972,0.651378833017789,0.573784312693499,1.  
13523290652552,0.256277745343633,0.706585842330907  
"5592","ANAPC1",65.295476920864,0.273338191913715,0.240914324052162,1.  
13458671662268,0.256548521351531,0.706851505445565  
"5593","CCDC74A",56.6383056852832,-0.387405773576003,0.341425078790085  
, -1.13467286863889,0.256512409192266,0.706851505445565  
"5594","INIP",104.367854778079,0.209154108011804,0.184359533180078,1.1  
3449033203782,0.2565889268589,0.706851505445565  
"5595","ZFPL1",148.701190357996,-0.261140003736078,0.230108734930065,-  
1.1348548059918,0.256436158493652,0.706851505445565  
"5596","AC006305.1",3.74884033205472,1.13019234985786,0.99624179311529  
,1.13445586971783,0.256603374925292,0.706851505445565  
"5597","SMAGP",9.02510065113886,-0.599350634350612,0.528420405212172,-  
1.1342306777687,0.256697798848266,0.706858979858168  
"5598","UBR7",79.3059198638379,-0.240991275400591,0.212457131911113,-1  
.13430541602819,0.256666458110337,0.706858979858168  
"5599","TMEM54",265.140042956415,-0.288662004573821,0.254602354326916,  
-1.13377586525838,0.256888577184098,0.707257977726893  
"5600","FAM87B",10.6519958106733,-0.698077655424093,0.615809656408586,  
-1.13359322667218,0.256965215532564,0.707300949742555  
"5601","TP53",86.9751419977928,-0.259809725924126,0.229206127146567,-1  
.13351998551936,0.256995953260334,0.707300949742555  
"5602","CCT7",507.867367395769,-0.246969182759372,0.217970363870862,-1  
.13304019121467,0.257197375671484,0.707629451631363  
"5603","RBM6",273.581050867493,0.254721296480036,0.224898225157403,1.1  
3260696611438,0.257379341965897,0.707629451631363  
"5604","EBLN2",11.1680016990258,0.651662513608632,0.575286319036716,1.  
13276205611808,0.257314189694689,0.707629451631363  
"5605","NSUN7",9.80470507301603,0.662151620190182,0.584640133750335,1.  
13257982469084,0.25739074507279,0.707629451631363  
"5606","SRD5A1",26.6683981332067,-0.396209060098314,0.349804781315851,  
-1.13265764581006,0.257358050506442,0.707629451631363  
"5607","TAP2",72.4642926960544,-0.241541564542721,0.213254242107113,-1  
.13264600111167,0.257362942547318,0.707629451631363  
"5608","DCAF8",226.935257220838,0.231315658368578,0.204302615583867,1.  
13222073886578,0.257541643188202,0.707665673751538  
"5609","PTPN11",170.152360355673,-0.228621886719934,0.201908901195354,  
-1.13230216878222,0.257507418632931,0.707665673751538  
"5610","NCBP3",205.030870963735,0.220338870163417,0.194595382812229,1.  
13229238525165,0.257511530431346,0.707665673751538  
"5611","ADAM23",12.9899120948551,0.739249943631898,0.653140992813331,1  
.13183822752828,0.257702452870306,0.70798134218424  
"5612","PRKCE",80.4311646940989,0.325140131369943,0.28734488076395,1.1

3153270907596,0.257830944379523,0.70819936169532  
"5613","RAB11FIP4",3.57555451377278,-1.02934691558461,0.90977429587343  
9,-1.13143108159192,0.25787369556898,0.70819936169532  
"5614","AC068193.1",3.52943733188564,0.993790117916034,0.8786690325467  
75,1.13101757442798,0.258047694516184,0.708294083094113  
"5615","MCRIP1",667.622522795883,-0.27587695587305,0.243941940224528,-  
1.13091236225771,0.258091979548468,0.708294083094113  
"5616","L3MBTL1",14.2340499608877,0.567874683860219,0.502071989674715,  
1.13106226903464,0.258028883628525,0.708294083094113  
"5617","C21orf58",15.2914500537616,0.491960374014133,0.434968982313745  
,1.1310240362364,0.258044974837244,0.708294083094113  
"5618","GASK1B",191.286962063086,0.893746918740508,0.790601045711575,1  
.1304651360992,0.258280281074525,0.708566943270738  
"5619","MOC52",212.109375208973,-0.254497896450827,0.225128155110569,-  
1.13045787776226,0.25828333793307,0.708566943270738  
"5620","PEF1",175.660287810837,-0.324724209848119,0.287408473169251,-1  
.12983520028964,0.258545672781787,0.708727224711279  
"5621","AC083798.2",16.7452806031602,-0.616526352761851,0.545517092233  
896,-1.1301687179721,0.258405138378837,0.708727224711279  
"5622","SMAP1",304.031396579121,-0.21505067853297,0.190357017123103,-1  
.12972288483538,0.258593011085578,0.708727224711279  
"5623","SART1",127.215665278412,-0.269418288518553,0.238434176534145,-  
1.12994828356736,0.258498016927081,0.708727224711279  
"5624","APBA2",4.51788298221956,0.891814755933793,0.789168574037004,1.  
13006876512036,0.258447249971153,0.708727224711279  
"5625","MPH0SPH6",84.0489792748419,-0.310493644469811,0.27485474206031  
3,-1.12966449893623,0.25861762173214,0.708727224711279  
"5626","SLC50A1",86.0688761562741,-0.273282375286619,0.242072173363034  
, -1.12892932504382,0.258927648907285,0.709154243106184  
"5627","NAIP",56.1181021073616,0.346815694074632,0.3071726023667,1.129  
05803252793,0.258873353613707,0.709154243106184  
"5628","MCTP1",2.47531382829626,-1.11536250177587,0.988044415206392,-1  
.12885866729269,0.258957459256874,0.709154243106184  
"5629","LFNG",13.1168086571926,0.744903171218898,0.659728726351618,1.1  
2910525412211,0.258853435147324,0.709154243106184  
"5630","C11orf65",7.19121410816488,0.669413044162134,0.593093114295375  
,1.12868119360555,0.259032345501683,0.709233322541463  
"5631","NIPBL",423.84838390733,0.262445688160399,0.232672896225218,1.1  
2795986304465,0.259336870309273,0.709530366018265  
"5632","AC004130.2",37.5723391489731,-0.425451307718057,0.377187798028  
456,-1.12795617976476,0.259338425919085,0.709530366018265  
"5633","TKFC",34.5308453640517,0.427625992169347,0.379141690102443,1.1  
2787911045552,0.259370977133501,0.709530366018265  
"5634","AC084824.4",3.58476163753386,0.882596483041242,0.7823830790952  
46,1.12808738663147,0.259283015519803,0.709530366018265  
"5635","PFDN5",4064.42821850604,-0.290642573515945,0.257599326918059,-  
1.12827380798397,0.259204301414716,0.709530366018265  
"5636","TRIM33",152.118306174654,0.239214245227402,0.212197986018438,1  
.12731628473899,0.259608779606867,0.709622273528802  
"5637","ECRG4",5.08696072272922,-0.820776059471109,0.727954707160984,-

1.12750979064635,0.25952700337724,0.709622273528802  
"5638","PIK3R1",2002.47061326751,0.297141026577923,0.263622495776372,1  
.12714594292433,0.259680781380212,0.709622273528802  
"5639","BCL2L2",55.3113409392392,-0.309588429233867,0.274554212010746,  
-1.127604005659,0.259487194262208,0.709622273528802  
"5640","AC022613.2",3.78081434502149,-0.907615054647084,0.805012835746  
886,-1.1274541402871,0.259550519573575,0.709622273528802  
"5641","QPCTL",3.91973171499144,0.923013583393639,0.818850450127722,1.  
12720654088872,0.259655165645271,0.709622273528802  
"5642","TMEM14C",1092.09636429754,-0.277530295129041,0.246299603608979  
, -1.1267996012273,0.259827219168597,0.709896594024092  
"5643","PHF8",42.3657864100374,0.361595188789403,0.320945575642684,1.1  
2665578288568,0.259888044235479,0.709936948766598  
"5644","NRAS",93.5302940964615,0.225058336533389,0.199805752911942,1.1  
2638566834748,0.260002310372188,0.710123248474003  
"5645","STRIP1",59.0816609395537,0.263334138600045,0.233889936391498,1  
.12588913684282,0.260212448036508,0.710190652455185  
"5646","TMEM45A",134.467360540684,0.508440651240324,0.451642741903845,  
1.12575849021077,0.260267758672975,0.710190652455185  
"5647","ARHGAP26",79.1627852524198,0.320685694789357,0.284788651784975  
, 1.12604801061907,0.260145198100966,0.710190652455185  
"5648","AL365272.1",5.26513475597437,-0.783109719068713,0.695413682513  
136,-1.12610628574154,0.260120533746504,0.710190652455185  
"5649","COX7A2",1093.3585057353,-0.251161603526115,0.223090705170949,-  
1.1258272877557,0.260238631489064,0.710190652455185  
"5650","AC023794.2",23.4381064837142,-0.378639972460864,0.336367261865  
152,-1.12567427151296,0.260303417863886,0.710190652455185  
"5651","LINC-  
PINT",411.006123332081,-0.392863722988664,0.349143174508058,-1.1252224  
06373,0.260494800631234,0.710587037998667  
"5652","CLTCL1",5.12272919333416,-0.713394747064725,0.634251871163053,  
-1.12478146222343,0.260681651759799,0.710891475927022  
"5653","HS6ST3",3.94203694312402,-2.72605730982556,2.42371921463771,-1  
.12474138644523,0.260698638560847,0.710891475927022  
"5654","CHN1",3.16523680394567,0.998950231126807,0.888342893519293,1.1  
2450973426413,0.260796843287758,0.711033487669047  
"5655","PRAC2",9.09072078369933,-1.02632142363594,0.912855422547467,-1  
.12429788801805,0.260886674046338,0.711152622533032  
"5656","PLK1",3.2613788441422,0.962079143629122,0.856115203858197,1.12  
377299140745,0.261109342102817,0.711507956251532  
"5657","ZNF417",12.3281462630735,0.545110764922547,0.485044735845844,1  
.12383606013569,0.261082580573111,0.711507956251532  
"5658","FOXO3B",7.85690938674057,0.647738770142713,0.57649649751877,1.  
12357797997138,0.261192101995202,0.711607679790747  
"5659","GATAD1",390.708547526307,0.239290784561689,0.213029566739436,1  
.12327499052924,0.261320722092213,0.711832290343074  
"5660","EIF3L",783.24848490214,-0.261834572782864,0.233166860814447,-1  
.12294934137845,0.261459010132328,0.712083152153682  
"5661","PCDH10",2.61692046743016,1.08301767901613,0.964683084525238,1.  
12266680777255,0.261579029984577,0.712158379938583

"5662", "AC007686.3", 10.4267620379702, 0.537603903486343, 0.478835604564148, 1.12273168152499, 0.261551468344284, 0.712158379938583  
"5663", "EHHADH", 5.19459972337526, 0.86819372523404, 0.773483974499438, 1.12244565350678, 0.261673002551234, 0.712288422095581  
"5664", "CFI", 40.7918739974455, 0.727507565435037, 0.648301230007963, 1.12217520461299, 0.261787953033496, 0.712475511301437  
"5665", "ITPK1", 53.8522549329469, -0.410555926993085, 0.365992886536525, -1.12175930761461, 0.261964792263874, 0.712830939584751  
"5666", "CLEC12A", 11.2774010716184, 0.934742015030951, 0.833390846344448, 1.12161300922738, 0.262027017896368, 0.712842023776554  
"5667", "LINC01697", 86.1088189031768, 0.52440847294985, 0.467582141872065, 1.12153229558825, 0.262061352497031, 0.712842023776554  
"5668", "ZNF853", 45.2287717760771, 0.349545468758974, 0.311861885545735, 1.12083420565259, 0.262358441169265, 0.713524236172233  
"5669", "HP1BP3", 985.916356068362, 0.179244615704579, 0.160065868074413, 1.11981784662081, 0.2627913925337, 0.713793146041251  
"5670", "AL109936.2", 2.62394034152073, 1.12058733287373, 1.00105003005589, 1.11941191671625, 0.262964449426975, 0.713793146041251  
"5671", "RPL11", 18249.5396249062, -0.297455513626423, 0.265877565738725, -1.118768756589, 0.263238803850117, 0.713793146041251  
"5672", "AC239799.2", 15.9197458456174, -0.465082637328523, 0.415161466413028, -1.12024519362746, 0.262609290038062, 0.713793146041251  
"5673", "ARPC5", 827.876817275925, -0.203076761970421, 0.181585065065734, -1.11835608229623, 0.263414943359941, 0.713793146041251  
"5674", "NENF", 1409.13258174019, -0.268483799067444, 0.239903510534629, -1.11913243148932, 0.263083645878386, 0.713793146041251  
"5675", "LGALS8", 144.648243968249, 0.290997469856861, 0.259975442055715, 1.11932676238895, 0.263000762579849, 0.713793146041251  
"5676", "WBP1", 207.835205404635, 0.229689066288312, 0.205413620372482, 1.11817836554271, 0.263490822276467, 0.713793146041251  
"5677", "ATOH8", 146.366069723306, 0.418521640296245, 0.374112548028748, 1.11870516640378, 0.26326594040183, 0.713793146041251  
"5678", "DAPP1", 4.85247570292902, -1.27177943541669, 1.13744230185677, -1.11810456964773, 0.263522335006212, 0.713793146041251  
"5679", "SELENOP", 5066.88012030509, 0.288624783934194, 0.257658380302921, 1.12018395673708, 0.262635379150831, 0.713793146041251  
"5680", "EDIL3", 135.838367470309, -0.523698659073136, 0.468260185941337, -1.1183924552978, 0.263399415203369, 0.713793146041251  
"5681", "OSTF1", 185.439283880792, -0.258251499238269, 0.230838095689478, -1.1187559768543, 0.263244257334389, 0.713793146041251  
"5682", "GCNT1", 5.09044255770819, -0.985532190136658, 0.881346913778215, -1.1182114269985, 0.263476705034845, 0.713793146041251  
"5683", "NYNRIN", 99.8430484353304, 0.309466587199586, 0.276549075434832, 1.11902954914239, 0.263127533117127, 0.713793146041251  
"5684", "TCF12", 217.823109049881, 0.214103332589406, 0.191204189248352, 1.11976277000558, 0.262814868300758, 0.713793146041251  
"5685", "ISG20", 48.6521339276989, -0.308265628266523, 0.275422685316361, -1.11924559849686, 0.263035377276138, 0.713793146041251  
"5686", "ZNF598", 65.6837220334069, -0.252779490647078, 0.226007830107645, -1.11845457091766, 0.263372898613895, 0.713793146041251

"5687", "AC092140.2", 3.22223566723975, 1.15803647765, 1.03529021335268, 1.11856217968083, 0.26332696577796, 0.713793146041251  
"5688", "SMAD4", 212.838106141718, 0.183570596493643, 0.163868944198399, 1.12022810296129, 0.262616571095102, 0.713793146041251  
"5689", "HMG1", 514.938423370344, 0.218456481630903, 0.195179216338379, 1.11926098346541, 0.26302881566845, 0.713793146041251  
"5690", "MIF", 2061.86101962518, -0.311190594677714, 0.277927575675015, -1.11968232703039, 0.262849158785583, 0.713793146041251  
"5691", "PPP6R2", 108.56117562407, 0.286938204062694, 0.25620342254436, 1.11996241585342, 0.262729778466644, 0.713793146041251  
"5692", "ZFYVE9", 92.7203711202051, 0.276799214223805, 0.247677270304213, 1.11758020380241, 0.263746327483609, 0.714148891298057  
"5693", "FUT8-  
AS1", 2.76362627865042, 1.08909935728487, 0.974456629621109, 1.11764785027769, 0.263717423675883, 0.714148891298057  
"5694", "PXK", 343.547836872696, 0.273491668269715, 0.244938734404503, 1.11657173755972, 0.264177481416732, 0.71481409093188  
"5695", "AC108863.2", 41.0895850027542, 0.462147950719605, 0.413825264273202, 1.11677074992333, 0.264092358331898, 0.71481409093188  
"5696", "ANKRD16", 65.9522871463662, 0.255498577116986, 0.228789759932817, 1.11673956558201, 0.264105695486164, 0.71481409093188  
"5697", "CD151", 1225.66567311381, -0.277359916175604, 0.248389562466383, -1.1166327337653, 0.264151389644365, 0.71481409093188  
"5698", "CYP19A1", 16.9949808682145, -0.639661723989719, 0.573116840074364, -1.11611050184238, 0.264374837402334, 0.715222555029304  
"5699", "HNRNPUL1", 529.980365423696, -0.216710337405885, 0.194203470881089, -1.11589322488771, 0.264467842229507, 0.71534862045409  
"5700", "LEO1", 147.170783081159, -0.227598870662023, 0.203997837472349, -1.11569256557866, 0.264553753948474, 0.715455459143111  
"5701", "TMEM81", 3.71346629834077, -0.91750070940054, 0.823858988251978, -1.11366231659042, 0.265424081388765, 0.715605537099114  
"5702", "SPRTN", 68.7940543873164, -0.241095427663054, 0.216417039471524, -1.11403163194448, 0.265265616665124, 0.715605537099114  
"5703", "ZNF141", 90.843914245847, 0.285722832431013, 0.256447092221093, 1.1141589867772, 0.265210986750619, 0.715605537099114  
"5704", "MRFAP1L1", 172.449107903129, 0.195072894102483, 0.175173470580515, 1.11359838596576, 0.265451519168153, 0.715605537099114  
"5705", "ZSCAN16", 9.12885088899525, -0.625988628946392, 0.561984914830514, -1.1138886692985, 0.265326950915349, 0.715605537099114  
"5706", "CNKSR3", 9.99769714487306, -0.573826025664746, 0.515297887173624, -1.11358117304176, 0.265458906953783, 0.715605537099114  
"5707", "AGMO", 6.01228976340879, 0.80405491278285, 0.72137295397895, 1.11461749203078, 0.265014371293808, 0.715605537099114  
"5708", "TBRG4", 78.6095251524526, -0.278753295649644, 0.250148209534768, -1.11435255190544, 0.265127970222341, 0.715605537099114  
"5709", "LY6E-  
DT", 11.28615484968, 0.628801658072076, 0.564083099322711, 1.11473231307067, 0.264965149655999, 0.715605537099114  
"5710", "SSNA1", 340.916310496888, -0.270956874238182, 0.243292211761031, -1.11370960984285, 0.265403785302643, 0.715605537099114



"5711", "ZNF511", 222.571726789201, -0.289837794191696, 0.259856278283449, -1.11537730050741, 0.264688772655032, 0.715605537099114  
"5712", "STRN3", 214.951301389107, -0.188990354069431, 0.169689311853637, -1.11374341733699, 0.265389277338184, 0.715605537099114  
"5713", "DCAF5", 243.004101809413, 0.231706917063138, 0.207777560683399, 1.11516814568923, 0.264778373679967, 0.715605537099114  
"5714", "RNF40", 104.927651402013, 0.249741231796339, 0.224232954157792, 1.11375793417321, 0.265383047829553, 0.715605537099114  
"5715", "NTN1", 30.8767379764626, -0.633115064059264, 0.567722175799246, -1.11518466434389, 0.264771296399157, 0.715605537099114  
"5716", "FHOD3", 9.42370224206603, 0.626767683841929, 0.562659786439286, 1.11393722982824, 0.265306116240193, 0.715605537099114  
"5717", "WDR83", 52.9726367695874, -0.262945287270325, 0.236141831013298, -1.11350575263185, 0.265491279057401, 0.715605537099114  
"5718", "ATF5", 107.311278992192, -0.375109950397269, 0.336825968808778, -1.11366101528302, 0.265424639865092, 0.715605537099114  
"5719", "RHBDD3", 56.7258350356078, 0.333635399252267, 0.29927099724778, 1.11482703743602, 0.264924547829944, 0.715605537099114  
"5720", "RPL22", 7198.66658666863, -0.286934374654768, 0.25775970284448, -1.11318554253568, 0.265628750569893, 0.715711475588494  
"5721", "FAM131A", 37.1269503936066, -0.331810942804893, 0.29827575040042, -1.11243016691586, 0.265953240053451, 0.715711475588494  
"5722", "AC098818.2", 53.6023613958684, -0.420300313427622, 0.377554482937138, -1.11321764784237, 0.265614965017918, 0.715711475588494  
"5723", "GPSM3", 16.325385081188, -0.467329832601701, 0.420017494274074, -1.11264373263642, 0.265861470183894, 0.715711475588494  
"5724", "VPS52", 56.825803244002, 0.300179884254447, 0.269885493853125, 1.11224905039842, 0.266031083484265, 0.715711475588494  
"5725", "SMARCD3", 84.0623851452713, 0.231686519633448, 0.208223185874001, 1.11268357873289, 0.265844350603051, 0.715711475588494  
"5726", "GST01", 723.085416654387, -0.274747868901832, 0.246859993592081, -1.11297041251583, 0.265721136984949, 0.715711475588494  
"5727", "PSMD9", 449.235101854898, -0.256728764525296, 0.230795901739002, -1.11236275250511, 0.265982212768017, 0.715711475588494  
"5728", "RBBP6", 573.87355061346, 0.27580845256868, 0.24798630318653, 1.11219228249563, 0.266055485416429, 0.715711475588494  
"5729", "NUP93", 50.9795321069004, -0.284259289736382, 0.255379800995196, -1.113084467247, 0.265672154046739, 0.715711475588494  
"5730", "ATMIN", 188.053419521786, 0.164365978521192, 0.147795546936919, 1.11211725879228, 0.266087737048178, 0.715711475588494  
"5731", "LILRB2", 6.740200804499, -1.05491278013493, 0.948435263352297, -1.11226650979454, 0.266023578796009, 0.715711475588494  
"5732", "NSD2", 42.3877429026401, 0.368919601779995, 0.331847443293212, 1.11171446167818, 0.266260939855583, 0.715927505298067  
"5733", "STK38L", 61.3699871862773, -0.284494640185247, 0.255904996914447, -1.11171975387553, 0.266258663707175, 0.715927505298067  
"5734", "GRHL1", 38.9366180030725, -0.563530424877122, 0.507320041213658, -1.11079866572784, 0.266655020929151, 0.715987586609569  
"5735", "CFAP44", 31.6239457422325, 0.512675861237637, 0.461488098136925, 1.1109189236025, 0.266603249242543, 0.715987586609569

"5736", "HIST1H4H", 15.3124968604547, 0.507604686064658, 0.456850986294417, 1.11109464856782, 0.266527611100221, 0.715987586609569  
"5737", "FAM86B1", 9.56126505042823, 0.555003048440226, 0.49970209710658, 1.11066783920631, 0.266711350331944, 0.715987586609569  
"5738", "ASAP1-IT2", 11.5703659541996, 0.674654025381083, 0.607536198117349, 1.11047543746648, 0.266794206778162, 0.715987586609569  
"5739", "MAF1", 525.725995409664, -0.209540536718958, 0.18866656002992, -1.11063951495023, 0.266723546860845, 0.715987586609569  
"5740", "PI4K2A", 89.2109655506152, 0.269513676172829, 0.242621236671264, 1.11084124320907, 0.266636690294849, 0.715987586609569  
"5741", "LIN7A", 4.07849626493991, -1.05770095190831, 0.952430088267135, -1.11052870435111, 0.266771265999393, 0.715987586609569  
"5742", "SDR39U1", 95.1648375532267, -0.254580060961854, 0.229111383548984, -1.11116286331283, 0.266498253078094, 0.715987586609569  
"5743", "GOLGA6L4", 49.8540186646202, 0.367596359009903, 0.330801804227452, 1.11122839812914, 0.266470050530031, 0.715987586609569  
"5744", "CSTF2", 14.2780234631472, -0.450988754016467, 0.405811960729483, -1.11132444988998, 0.26642871889353, 0.715987586609569  
"5745", "SLC1A1", 5.4232909043758, -0.795117749008458, 0.71630997448155, -1.11001909415536, 0.26699079858946, 0.716039068739922  
"5746", "PYGM", 15.1508453327297, 0.580187688636305, 0.522678156275595, 1.11002857431522, 0.266986713541903, 0.716039068739922  
"5747", "PI4KA", 97.3066739386485, 0.225086134046049, 0.202800065066795, 1.10989182361413, 0.267045644254675, 0.716039068739922  
"5748", "CRELD2", 226.272323808697, -0.289669271962664, 0.260921713911006, -1.1101769477931, 0.26692278428112, 0.716039068739922  
"5749", "SPIN2A", 33.5689700229423, 0.359617043060114, 0.324005310035332, 1.10991095491892, 0.267037399360771, 0.716039068739922  
"5750", "DIRAS3", 5.92773599971706, -0.795299942695498, 0.717052017411863, -1.10912447546841, 0.267376487634352, 0.716207593691543  
"5751", "TIPRL", 289.768840044282, -0.187355613803074, 0.16890346968521, -1.10924668482094, 0.267323778018634, 0.716207593691543  
"5752", "AC092903.2", 18.8263742910979, 0.505187479565334, 0.455493384529377, 1.10909948799213, 0.267387265760287, 0.716207593691543  
"5753", "CEP164", 143.563102661608, -0.238758680802344, 0.215182671345025, -1.10956276966893, 0.267187481893722, 0.716207593691543  
"5754", "ZMYM5", 123.577753193831, 0.201870208131217, 0.182006898839202, 1.10913492520722, 0.267371980320919, 0.716207593691543  
"5755", "SMCHD1", 278.822995708671, 0.242299122417364, 0.218388151274665, 1.10948840861163, 0.267219542161909, 0.716207593691543  
"5756", "PCNX2", 162.347672464843, 0.330829816737931, 0.298390616950983, 1.10871387350721, 0.267553635018023, 0.716404252875251  
"5757", "AP001830.1", 3.40431994273818, -0.949825433330701, 0.856684810577761, -1.10872215965884, 0.267550059298323, 0.716404252875251  
"5758", "FRYL", 114.566928775183, 0.252158367212308, 0.22746215354477, 1.10857284731843, 0.267614497030204, 0.716405760594738  
"5759", "SWI5", 269.237279499849, -0.247987435911524, 0.223714986096966, -1.10849720100574, 0.267647147276361, 0.716405760594738  
"5760", "TIGD1", 7.34788889235965, 0.742601628045066, 0.670045174345621, 1.

10828591336443,0.267738357150457,0.716525481853176  
"5761","MED8",183.400101998182,-0.24758329535523,0.223551663217436,-1.  
1074992321324,0.268078144099698,0.717061355421974  
"5762","EIF3M",578.283216095507,-0.282870639946735,0.255403988093511,-  
1.1075419849872,0.26805967048151,0.717061355421974  
"5763","SNRNP25",128.31240758955,-0.36284933099812,0.327620346438847,-  
1.10752990448305,0.268064890409669,0.717061355421974  
"5764","AL034417.4",7.09397334830903,0.813767470186336,0.7355200686963  
81,1.10638377499154,0.268560445149898,0.717074905619092  
"5765","CYP1B1",300.313866207558,0.497662350184831,0.449748837861794,1  
.10653393247402,0.268495485410986,0.717074905619092  
"5766","CPEB2",56.4924458204783,-0.285707913456096,0.258175659878837,-  
1.10664155401086,0.268448933818426,0.717074905619092  
"5767","USP46-  
AS1",17.0187678060873,0.441139503336298,0.398750663771959,1.1063041228  
9064,0.268594907884829,0.717074905619092  
"5768","LYRM7",130.089840044802,0.254993219098381,0.230421845969724,1.  
10663647374774,0.268451131156693,0.717074905619092  
"5769","DNAJB5",7.1417753748417,-0.618801421704012,0.559220242981634,-  
1.10654331539342,0.268491426617592,0.717074905619092  
"5770","COX8A",949.081082131862,-0.263313324806531,0.23786782978375,-1  
.10697325084234,0.268305493545948,0.717074905619092  
"5771","C12orf81",31.6883263487041,0.540055094559979,0.488138006030256  
,1.10635739870357,0.268571856929647,0.717074905619092  
"5772","GAS2L3",5.39256986086753,-0.835604421548763,0.754821696615574,  
-1.10702226141008,0.268284303689998,0.717074905619092  
"5773","PIP4P1",101.331549432875,-0.248902866345222,0.224984227778965,  
-1.1063125126698,0.268591277771751,0.717074905619092  
"5774","SEC23B",48.1811587111301,-0.265270316918185,0.239635876365539,  
-1.10697246564844,0.268305833036083,0.717074905619092  
"5775","CCDC24",4.98333322404898,-0.786270700370635,0.710943435945597,  
-1.10595394881851,0.268746452232543,0.717136351541708  
"5776","HOXB-  
AS1",104.126781145579,0.310706022980642,0.280907773307049,1.1060784090  
194,0.26869258304005,0.717136351541708  
"5777","MANBAL",233.517584411647,-0.264739586133994,0.239382200675414,  
-1.10592844993084,0.268757489643623,0.717136351541708  
"5778","C3orf70",12.535331488449,-0.691188405036807,0.625052304600459,  
-1.10580890583009,0.268809239477829,0.717150298814595  
"5779","BIN1",868.978837858486,0.314673550872297,0.284614152905034,1.1  
0561455802689,0.26889338593215,0.717199569859021  
"5780","SPTY2D10S",12.9333073114194,0.507260548805943,0.45891957192758  
9,1.10533648995467,0.269013812061295,0.717199569859021  
"5781","NADSYN1",69.016875526812,-0.235012694752193,0.212579837470887,  
-1.10552674020356,0.268931414204661,0.717199569859021  
"5782","JMJD8",196.626862696564,-0.285134626613698,0.257941342514116,-  
1.10542429466534,0.268975781469121,0.717199569859021  
"5783","FOXK1",108.500471372465,0.265450548389475,0.240179752643882,1.  
10521617858047,0.269065928161553,0.717214470449651  
"5784","RRN3",91.0470847381948,0.216988262665561,0.196442699527099,1.1

0458807167648,0.269338122061342,0.71781589757531  
"5785","USP53",960.307044881699,0.319509988078583,0.289300793456919,1.  
10442140258479,0.269410380827477,0.717884359629311  
"5786","AC239868.1",4.5864330823226,0.824738023608646,0.74724117059564  
8,1.10371063060032,0.269718682712427,0.71796123191367  
"5787","HAX1",336.627477407258,-0.244428613412056,0.221353981196616,-1  
.10424313170561,0.269487684228798,0.71796123191367  
"5788","IKBKE",22.2979767314957,-0.388601593675646,0.351984428969307,-  
1.10403063798465,0.269579847524508,0.71796123191367  
"5789","PSMD6",184.074102519494,-0.249047057599614,0.225640399001909,-  
1.10373434323482,0.269708393304696,0.71796123191367  
"5790","AL133346.1",2.75024722320793,0.990439225095372,0.8972821649953  
81,1.10382136604763,0.269670634594918,0.71796123191367  
"5791","NUCB1",1081.97208488247,0.210752585362836,0.19090899046734,1.1  
0394269461548,0.269617996863953,0.71796123191367  
"5792","ARPC1B",1363.03649886793,-0.29593628659896,0.268265793700126,-  
1.1031458111643,0.269963849275479,0.718117814768163  
"5793","FCN1",10.6232674993633,-0.565557200127103,0.512601412230126,-1  
.10330792431216,0.269893466510201,0.718117814768163  
"5794","BACE1-  
AS",22.3331542327458,0.481844127819456,0.436782141569439,1.10316810593  
057,0.269954169071585,0.718117814768163  
"5795","ZNF133",28.5976440576869,0.338135988476896,0.306514302258598,1  
.10316545096033,0.269955321825311,0.718117814768163  
"5796","P4HA2",459.165269225464,-0.22543212217897,0.204395965703879,-1  
.10291864813794,0.270062495162158,0.718256273796527  
"5797","SCLY",18.6214582882975,0.391881420331145,0.355723026550578,1.1  
0164760524837,0.270614903564207,0.71836361759829  
"5798","PSMD6-  
AS2",10.58711095201,0.574345537337277,0.521101407210394,1.102176139596  
16,0.270385103060616,0.71836361759829  
"5799","B3GNT5",6.25771923503384,-0.704933099163213,0.640513215624367,  
-1.10057541666186,0.271081489689864,0.71836361759829  
"5800","CLCN2",10.3345850962567,0.565275617854841,0.513518391380174,1.  
10078943099888,0.27098831270414,0.71836361759829  
"5801","CEP44",98.6619196158435,0.222769353825221,0.202112073391012,1.  
10220705813178,0.270371664189336,0.71836361759829  
"5802","ZBTB22",51.8001185903736,-0.285056319377564,0.258655332590121,  
-1.10207014300873,0.270431178398537,0.71836361759829  
"5803","AC004160.1",22.4976391761186,0.52175390374895,0.47400763276501  
8,1.10072890747648,0.271014661046449,0.71836361759829  
"5804","POM121C",106.878726481964,0.245853676184202,0.223145973438047,  
1.10176165133654,0.270565306345764,0.71836361759829  
"5805","UPK3BL1",164.928572556677,-0.34519998359009,0.313363214884727,  
-1.10159701966638,0.270636904596672,0.71836361759829  
"5806","NMRK1",73.4399687993519,-0.483211764832182,0.438773304853909,-  
1.10127885969058,0.27077530904802,0.71836361759829  
"5807","ANAPC16",618.800889069974,-0.231825707830434,0.210626756610665  
, -1.10064700022398,0.2710503213884,0.71836361759829  
"5808","FRMD8",49.4655996479405,-0.257540322451329,0.233557268336897,-

1.10268596770809,0.270163562615531,0.71836361759829  
"5809","SPCS2",1217.40108220962,-0.25879976682462,0.234776585950737,-1  
.10232358042264,0.270321021401772,0.71836361759829  
"5810","HCFC2",137.073707772529,0.20656643233753,0.187682609129491,1.1  
0061573256907,0.271063935380825,0.71836361759829  
"5811","AKAP11",180.601324924725,0.226743754887976,0.205860695117531,1  
.10144267587614,0.27070404044667,0.71836361759829  
"5812","LTB4R",18.8984751460846,-0.456924845956855,0.414816287207675,-  
1.10151134381109,0.270674170131131,0.71836361759829  
"5813","AC092376.1",2.35927029377238,-1.00218894095261,0.9102015153005  
81,-1.10106270326484,0.270869368066517,0.71836361759829  
"5814","SPIRE1",54.4945327753044,-0.284146688674874,0.257709177084086,  
-1.10258661290188,0.270206726433504,0.71836361759829  
"5815","CHERP",91.2935745616611,0.225327585250417,0.204722745578942,1.  
10064753485601,0.27105008861274,0.71836361759829  
"5816","KIAA0930",316.712473722813,-0.271572083067711,0.24656742734028  
4,-1.10141102576748,0.270717808895739,0.71836361759829  
"5817","UXT-  
AS1",2.47026344627027,1.08393057159447,0.984056852198417,1.10149181845  
839,0.270682663362533,0.71836361759829  
"5818","SLC20A1",306.674379047364,0.394278570155513,0.358485961532205,  
1.0998438222527,0.271400175062445,0.718978040724373  
"5819","AC018553.1",2.76169639786743,1.03920365109469,0.94487747107926  
3,1.0998290073608,0.271406631136888,0.718978040724373  
"5820","EXOSC10",108.534244982032,0.237744574989818,0.216301644733937,  
1.09913438375495,0.271709454227812,0.71918852625834  
"5821","C1orf54",100.167496559287,0.448167200376921,0.407873093147316,  
1.09879079524143,0.27185932809,0.71918852625834  
"5822","PRKRA",211.373798054944,-0.252085254195357,0.229323810550643,-  
1.09925460243339,0.271657028011091,0.71918852625834  
"5823","ERCC6L2",128.142935113396,0.240413777770582,0.218736381950724,  
1.09910283614704,0.271723212985654,0.71918852625834  
"5824","NUBP2",202.472847385806,-0.267781511098723,0.243569741110741,-  
1.09940384990997,0.27159195225181,0.71918852625834  
"5825","AC002546.1",2.93002264960077,1.45092696839201,1.32040635305448  
,1.09884882410297,0.271834011835497,0.71918852625834  
"5826","C1orf21",89.8442449149561,-0.301090478438329,0.27388832205035  
4,-1.09931842359812,0.2716291990262,0.71918852625834  
"5827","CEP250",43.0035938624249,0.371535334956867,0.33807536155493,1.  
0989719370499,0.271780306688887,0.71918852625834  
"5828","AL590064.1",3.73355267710285,1.07084934323299,0.97484457690201  
1,1.09848212587496,0.271994018421734,0.719288467641191  
"5829","CCNF",5.6136305401291,0.675929902922779,0.615320183733023,1.09  
850110689048,0.27198573458671,0.719288467641191  
"5830","MRTFA-  
AS1",3.34865608497505,1.14673754206021,1.0440229732252,1.0983834374043  
6,0.272037091556805,0.719288467641191  
"5831","QSER1",170.654025461331,0.240289390762252,0.218827230386592,1.  
09807810635698,0.272170384571542,0.719517488967642  
"5832","AIMP2",71.6201754548597,-0.292170229744487,0.266142108985174,-

1.09779783010873,0.272292779198861,0.719594238187973  
"5833","ALDH1B1",27.3837707879217,0.36363609076172,0.331231865510926,1  
.09782943196244,0.272278977012057,0.719594238187973  
"5834","MAD2L1",11.5672870894757,-0.524330575854154,0.477730514300276,  
-1.09754466201962,0.272403368264223,0.719763099381727  
"5835","KLHL5",51.0534183357664,-0.326433016944996,0.297647913294927,-  
1.09670856862869,0.272768809528543,0.720234874765756  
"5836","ZNF354B",40.2365072803227,0.316000247268129,0.288091948356333,  
1.0968728875313,0.272696962247853,0.720234874765756  
"5837","CBWD3",15.2634374726889,-0.430241091043459,0.392263428813649,-  
1.09681672937156,0.272721515550475,0.720234874765756  
"5838","TARBP2",30.3453016102956,0.367709552988942,0.335263110968696,1  
.09677903997996,0.272737994841649,0.720234874765756  
"5839","RPU3D3",86.073630814992,-0.278825072600347,0.254336151143115,-  
1.09628564931555,0.272953787566752,0.720476478654364  
"5840","PPA2",86.0810906228871,-0.291906403058943,0.266258834332702,-1  
.09632570048058,0.272936266160575,0.720476478654364  
"5841","MAP7D1",213.164563042736,-0.20009860416983,0.182651344863948,-  
1.09552220553798,0.273287922675153,0.72049483975329  
"5842","NEB",2.65270487853163,1.43616752725954,1.31080941856245,1.0956  
3412264353,0.273238922623173,0.72049483975329  
"5843","FBX025",118.469407541833,0.22355487739739,0.204050149771353,1.  
09558791134382,0.273259154334635,0.72049483975329  
"5844","GTF2F2",162.395196336792,-0.186572122326106,0.17022508139198,-  
1.09603191727359,0.273064807011738,0.72049483975329  
"5845","MAP2K5",62.6712727761532,0.264903040307146,0.241754913052977,1  
.09575039018585,0.273188024206224,0.72049483975329  
"5846","GNAS",5543.14846436805,-0.213855134397188,0.195179046347957,-1  
.09568695205087,0.273215794701139,0.72049483975329  
"5847","DGCRL",337.333406982767,-0.278254995006942,0.253911488119858,  
-1.09587398769288,0.273133924062315,0.72049483975329  
"5848","UBR5",217.139299166385,0.237533996272147,0.216872477151169,1.0  
9527036068563,0.273398208496526,0.72053913215489  
"5849","ABITRAM",47.1000051672356,0.329780468855643,0.301071943410551,  
1.09535436985553,0.273361416511731,0.72053913215489  
"5850","KCNK1",52.2826542895886,0.44605286785893,0.40732051028707,1.09  
509061437776,0.27347694012439,0.720623424276491  
"5851","CCNC",176.611157172612,-0.221470588460062,0.20229565360437,-1.  
09478668727699,0.273610100095549,0.720727903788942  
"5852","CCNY",432.46025818755,-0.172005556805055,0.157107520893397,-1.  
09482700654265,0.273592432414483,0.720727903788942  
"5853","NCKAP5L",166.314101231419,0.349524906122933,0.3193260591898,1.  
09457056843326,0.273704815481501,0.72080902705647  
"5854","PCBP2",1668.33363252272,-0.190147259238037,0.173734031329269,-  
1.09447330372287,0.273747449638859,0.72080902705647  
"5855","URI1",406.703686000423,-0.164745743644682,0.150535719017998,-1  
.09439636465938,0.273781177646165,0.72080902705647  
"5856","SH3BP2",46.3649803422865,0.291705537134559,0.266581321670616,1  
.09424597082232,0.273847114443835,0.720859506344214  
"5857","AC103706.1",11.1973446556614,-0.678119531168129,0.619869444246

402,-1.09397154104368,0.273967459980318,0.7210531663986  
"5858","RBM17",357.234701343574,-0.197826465771997,0.180853016591435,-  
1.0938521762062,0.274019816252073,0.721067850379944  
"5859","ITK",7.14423354978233,0.755003362092978,0.690504027614964,1.09  
340906337766,0.274214235930283,0.721390335644127  
"5860","DYNCH2H1",198.975639927457,0.271019070889989,0.247877351025542,  
1.09335955773572,0.274235962820278,0.721390335644127  
"5861","AC119674.1",14.9354539923558,0.470732565326516,0.4307384927845  
49,1.09285000809522,0.274459660812694,0.721526354798623  
"5862","ANKS6",46.7593429497134,0.303920887047235,0.2781353144544,1.09  
270873295402,0.274521704242227,0.721526354798623  
"5863","TTC25",7.77676233486486,-0.668307675772499,0.611592139971958,-  
1.09273424573956,0.274510499151088,0.721526354798623  
"5864","RPL17",12545.6754801423,-0.270433299219829,0.247441479080541,-  
1.09291821332754,0.274429710729872,0.721526354798623  
"5865","OSER1",251.237214705941,-0.282019230608707,0.258010945376372,-  
1.09305142150971,0.274371223179008,0.721526354798623  
"5866","CATSPERE",4.04362015497102,1.06998167898544,0.979373604682734,  
1.09251635317664,0.274606206562138,0.721625413255259  
"5867","AC092645.2",3.87075180454289,0.89867889782833,0.82268074157245  
7,1.09237867427237,0.274666692569543,0.721661337303478  
"5868","SNX3",1513.2460994408,-0.245839471681776,0.225095861968967,-1.  
09215455820183,0.274765172183023,0.72179705678277  
"5869","ARHGEF9",69.4979588515736,0.250139870332469,0.229089701273354,  
1.09188614303529,0.274883149141183,0.721983940025786  
"5870","PPCS",393.502730547376,-0.266939303147457,0.244561224427211,-1.  
09150297138337,0.275051625125194,0.722094366890072  
"5871","WDR36",89.5130330571311,0.262574651449045,0.240569535892864,1.  
09147091494569,0.275065723151379,0.722094366890072  
"5872","SLC12A2",36.1136805328773,-0.302063660473581,0.276743686842377  
,-1.09149250673106,0.27505622729607,0.722094366890072  
"5873","FAM193A",100.959442188444,0.283385212161496,0.259714774434549,  
1.09114012777472,0.275211228079798,0.722353325532111  
"5874","ABCA7",3.39278946192043,0.900546349122158,0.825937198507807,1.  
0903327162757,0.275566608610088,0.723162967607168  
"5875","MARC2",68.4588409970575,0.312253809602593,0.286485126995078,1.  
08994771518438,0.275736176261814,0.723238583814168  
"5876","RAB3IP",10.1918728858732,0.7072892613607,0.648883706539365,1.0  
9000927937122,0.275709056507492,0.723238583814168  
"5877","POLR2E",576.055105653781,-0.242118410025946,0.222118454557867,  
-1.09004184505015,0.275694711675683,0.723238583814168  
"5878","ADAMTS14",9.163475747977,0.942736680083598,0.865399132486202,1.  
0893663336306,0.275992371472324,0.723664297711494  
"5879","RTEL1",10.8103594659041,0.505436810563768,0.46395657527981,1.0  
894054260551,0.275975139671683,0.723664297711494  
"5880","UBAP1L",9.89001753863685,0.611074766305893,0.561021260536553,1.  
08921855425135,0.276057518723744,0.723712015497706  
"5881","RNASEH2B",200.544743501822,-0.20497966709372,0.188217859349003  
,-1.0890553521472,0.27612947713507,0.723777570147441  
"5882","SCRN3",46.5716967232845,0.326139049279533,0.299720150996027,1.

08814521878396,0.276531004024981,0.724337370780812  
"5883","EAF2",11.998457761974,-0.520638809835724,0.478395848536108,-1.  
0883012706504,0.276462129789896,0.724337370780812  
"5884","FBX09",221.151249449244,-0.188278056093195,0.173014198584631,-  
1.08822314950699,0.276496607466891,0.724337370780812  
"5885","ZNF578",8.03751173078344,0.623642973274228,0.573060632507731,1.  
.08826699636502,0.27647725590679,0.724337370780812  
"5886","FCER1A",11.6605489982124,-0.868067468533548,0.798339676001279,  
-1.08734100863122,0.276886131471957,0.724354344721775  
"5887","C1orf112",15.3399301471285,-0.420574456485548,0.38666257023375  
8,-1.08770408325608,0.276725764559028,0.724354344721775  
"5888","PARP3",37.8349067925609,0.346355635100561,0.318493702527938,1.  
08748032489019,0.276824589201605,0.724354344721775  
"5889","INPP4B",2.42569258966564,1.20446381214511,1.10748361634846,1.0  
8756806363999,0.276785835826263,0.724354344721775  
"5890","RASGRP2",6.57534167891077,-0.734892362037108,0.675900277408444  
, -1.08727927269812,0.276913405997108,0.724354344721775  
"5891","DNAJC7",333.712035217335,-0.182698007376781,0.168026400641415,  
-1.08731727085363,0.276896618447771,0.724354344721775  
"5892","PLD3",974.033005894126,0.2110578731632,0.193989588296557,1.087  
98557188827,0.27660147704697,0.724354344721775  
"5893","MT-  
ND4L",2131.05602849901,-0.355256062977596,0.326600379792805,-1.0877392  
8310485,0.276710220458123,0.724354344721775  
"5894","RMND5A",116.548632750869,0.257715599228712,0.237053784504273,1.  
.0871608726587,0.276965719470724,0.724368266990364  
"5895","EMILIN1",515.237389599012,0.225626740337173,0.207623802536152,  
1.0867094118358,0.27716525319086,0.724767154866345  
"5896","RER1",735.842417242062,-0.213788114573189,0.196789204535862,-1.  
.08638131383995,0.277310325248322,0.72502351826711  
"5897","FAM41C",3.19248022540613,-0.941975903713254,0.867443850995278,  
-1.08592147218804,0.277513736219261,0.725432218181922  
"5898","AASDH",95.0200532700928,0.223035317706246,0.205428296134993,1.  
08570884295162,0.277607827120023,0.725432218181922  
"5899","DYNLRB1",1125.78051712341,-0.294860750536641,0.271560728839003  
, -1.08580040934951,0.277567305264848,0.725432218181922  
"5900","NUP153",118.907700106212,0.230783929452475,0.212606710121069,1.  
.08549692209176,0.277701626171226,0.725554333462618  
"5901","HPGD",149.510212209909,0.357979834688614,0.329868948789048,1.0  
8521834505115,0.277824960982427,0.725630595314151  
"5902","ERAP1",87.7272232788372,0.289559232333504,0.266810220876831,1.  
08526289353501,0.27780523546364,0.725630595314151  
"5903","NCAM2",52.8321327377763,0.492905200938286,0.454495278924745,1.  
08451115730929,0.278138222720412,0.726325716285812  
"5904","AGT",10.9108196663174,0.987503358118997,0.910762771350532,1.08  
425968779408,0.27824967366618,0.726370655302992  
"5905","GGA3",78.774618045287,0.269711935007438,0.248731776890193,1.08  
434852345588,0.2782102983504,0.726370655302992  
"5906","ISG15",282.02231989241,-0.435630642784596,0.401882898041501,-1.  
.08397407530293,0.278376293594316,0.726455149103839



"5907", "BAK1", 31.5152620071988, -0.334990464834759, 0.309016403622063, -1.08405398842342, 0.278340861944351, 0.726455149103839  
"5908", "THBS3", 314.559163813536, -0.267936025510585, 0.247237804907738, -1.08371786268921, 0.278489913103544, 0.72662864090913  
"5909", "SRSF11", 1000.28168043795, 0.19724994657794, 0.182104627216213, 1.08316822912877, 0.278733758897889, 0.727141799528001  
"5910", "NDUFA7", 195.095948906707, -0.328961625355534, 0.303780765875728, -1.08289155308176, 0.278856561608861, 0.727339068900268  
"5911", "RSAD2", 15.3005674873011, -0.745353627866361, 0.688565493837985, -1.0824731046452, 0.27904235993329, 0.727454418801229  
"5912", "DEF6", 5.39716229783537, 0.824932989624444, 0.762074279499207, 1.08248370508783, 0.279037652114697, 0.727454418801229  
"5913", "GCN1", 75.3240769394015, 0.248563806192644, 0.229604193537612, 1.0825752019722, 0.278997019195345, 0.727454418801229  
"5914", "LPIN2", 252.5795726674, 0.172330450799749, 0.159241024806946, 1.0821988304124, 0.279164188093638, 0.727648961694866  
"5915", "SAC3D1", 68.5537632754678, -0.309997715263937, 0.286561069743745, -1.08178586693981, 0.279347687984406, 0.727881103833607  
"5916", "ZPR1", 105.962370099516, -0.225049793749312, 0.2080167572608, -1.08188300170047, 0.279304518879498, 0.727881103833607  
"5917", "ATL2", 78.0844298784084, 0.237876410632077, 0.219924944386949, 1.08162542132348, 0.279419003944268, 0.727943881325146  
"5918", "LINC01138", 14.7284047418418, 0.446742021440169, 0.413175935098626, 1.08123920947509, 0.279590720772218, 0.728100025277669  
"5919", "ASH1L", 553.943901213487, 0.232183693807108, 0.214751868783424, 1.08117193634885, 0.279620638964891, 0.728100025277669  
"5920", "TRPC4AP", 148.535324740587, 0.189668981080177, 0.175416876273945, 1.0812470562067, 0.279587231258536, 0.728100025277669  
"5921", "KPNA3", 155.364873999294, -0.260561405806521, 0.241045765160374, -1.08096238750829, 0.279713844991677, 0.728219712978669  
"5922", "WNT2B", 29.8989799695775, 0.436098594120993, 0.40388327107923, 1.07976394505194, 0.280247310497085, 0.728255612156534  
"5923", "CHD1L", 10.9714778367075, -0.528543473113229, 0.489034229413464, -1.08079034415884, 0.27979038459254, 0.728255612156534  
"5924", "MARS2", 4.034898916008, -0.746526400791426, 0.69130921591299, -1.07987335277386, 0.280198580930535, 0.728255612156534  
"5925", "ZNF197", 62.1322308587169, 0.264251335659749, 0.244519219876787, 1.08069760648224, 0.279831648149117, 0.728255612156534  
"5926", "CASC1", 4.1353048460758, -0.770034609649398, 0.713085542155657, -1.07986288338084, 0.280203243688545, 0.728255612156534  
"5927", "ARPC3", 1247.36747044591, -0.276326525884907, 0.255873577174946, -1.0799338053416, 0.280171658175781, 0.728255612156534  
"5928", "CSNK1G1", 125.940958221986, 0.235246942362821, 0.217715903456579, 1.08052254625367, 0.279909552332779, 0.728255612156534  
"5929", "SNHG22", 2.72570150457806, 1.08900724849057, 1.00826033965789, 1.08008537642181, 0.280104163212264, 0.728255612156534  
"5930", "CDKN2D", 66.7469574108725, -0.289457331614884, 0.268017282261133, -1.07999502559265, 0.280144395321891, 0.728255612156534  
"5931", "SHANK3", 8.3702683616238, -0.580412695208343, 0.537347463670434, -1.08014410497771, 0.280078014216124, 0.728255612156534

"5932", "TMSB15B", 9.28334066078915, 0.553066239112493, 0.51201728562415, 1.08017103062898, 0.280066026075581, 0.728255612156534  
"5933", "FAM71F2", 12.2873742280398, 0.701482056538854, 0.649736141501512, 1.0796414293928, 0.280301885095971, 0.728274660164233  
"5934", "RNF7", 751.438718459356, -0.260782034569477, 0.241612237974758, -1.07934116564377, 0.280435668107314, 0.728499464758045  
"5935", "XIAP", 293.645459402852, 0.251713429201215, 0.233286527106695, 1.07898828244844, 0.280592951229631, 0.728785230531551  
"5936", "SLC35B2", 176.514856118694, 0.23091625634809, 0.214044557200339, 1.07882330374773, 0.28066650422496, 0.728853464054541  
"5937", "ICK", 216.908986549489, 0.235547196571968, 0.218370460782911, 1.07865869645315, 0.280739904683238, 0.728921278540022  
"5938", "RNF11", 284.507387384581, 0.170241631041858, 0.157935092443867, 1.07792149551794, 0.281068791733609, 0.729371893226201  
"5939", "DPP4", 448.520921541107, 0.376239038222992, 0.349135302096335, 1.07763103863722, 0.281198444900872, 0.729371893226201  
"5940", "NMUR1", 4.44795055314429, 0.837715618141948, 0.777146277167226, 1.07793814723723, 0.281061360025182, 0.729371893226201  
"5941", "NAT1", 12.1878951058513, -0.506158936526665, 0.469617540910276, -1.07781096835855, 0.281118123692165, 0.729371893226201  
"5942", "CCT2", 347.182335130853, -0.203857202091088, 0.189156298698545, -1.07771828637846, 0.281159495282254, 0.729371893226201  
"5943", "NUBP1", 128.802400840196, -0.260793220410634, 0.242053095268114, -1.07742154720956, 0.281291982175139, 0.729371893226201  
"5944", "COLGALT1", 189.932846475887, 0.179780646566636, 0.166851884259606, 1.07748646270553, 0.281262995349367, 0.729371893226201  
"5945", "ZNRF3-  
AS1", 3.06799242432334, 1.01792469122611, 0.944636394941974, 1.07758360431226, 0.281219622331034, 0.729371893226201  
"5946", "SLC25A24", 173.210112446736, -0.187943789578773, 0.174509494588215, -1.07698317516911, 0.281487782255869, 0.729479526099122  
"5947", "FAM178B", 4.59078264832935, -0.726301706233189, 0.674328338419197, -1.07707427502725, 0.281447084642257, 0.729479526099122  
"5948", "AC078785.1", 4.6848874216045, 0.725289253264732, 0.673489748558605, 1.07691209081799, 0.281519540989457, 0.729479526099122  
"5949", "CHCHD2", 2854.80036186037, -0.298674444556958, 0.277345253710509, -1.0769048345378, 0.281522783053109, 0.729479526099122  
"5950", "OXCT1-  
AS1", 2.54521753834106, -1.09233622251573, 1.01477358327172, -1.07643344340315, 0.281733452144528, 0.729902716774437  
"5951", "GTF3C3", 65.1152241950798, 0.293295330077713, 0.272522878921059, 1.07622277894206, 0.281827634625006, 0.729951027980088  
"5952", "TRMT1", 51.5870575348644, -0.301728182282289, 0.280369649764799, -1.0761799022662, 0.281846806262568, 0.729951027980088  
"5953", "ACADL", 35.530300131034, 0.418133206439256, 0.388591376431092, 1.07602286566285, 0.2819170302865, 0.729982832734417  
"5954", "REV3L", 690.238753407396, -0.256442399713167, 0.23834251273242, -1.07594065688595, 0.281953797346787, 0.729982832734417  
"5955", "NEK10", 3.88618865539504, -0.820339501969268, 0.762668023889129, -1.07561806221539, 0.282098106035685, 0.730111199553405

"5956", "ZNF410", 103.705634512754, -0.203335771237244, 0.189027572666555, -1.07569371160433, 0.282064260733155, 0.730111199553405  
"5957", "GGCX", 175.945564144696, 0.262840322745639, 0.244507428615558, 1.07497888401136, 0.282384182330957, 0.730728919024962  
"5958", "NFKBID", 9.28812858491353, -0.611000764020402, 0.568579212717178, -1.07460974716345, 0.282549486078319, 0.730911281741448  
"5959", "ZNF571", 31.0053979197689, 0.350600372438182, 0.326253429288078, 1.07462586126139, 0.282542268630002, 0.730911281741448  
"5960", "TAF15", 182.579447638206, -0.227628408995805, 0.211972283322921, -1.07385930569532, 0.282885744642278, 0.731658347929649  
"5961", "PRKD3", 174.650446354711, 0.226068454527164, 0.210578115393631, 1.07356101133576, 0.283019479969725, 0.731751104901775  
"5962", "AC009831.1", 3.73826244017315, -0.889118564281568, 0.828272281795055, -1.07346169106933, 0.283064018068718, 0.731751104901775  
"5963", "PMAIP1", 12.3591870622151, -0.669543886013449, 0.623652825622597, -1.07358430605207, 0.283009034628243, 0.731751104901775  
"5964", "AL110114.1", 2.90628038750818, 1.02379383678015, 0.953897463668884, 1.07327451405776, 0.283147966597698, 0.731845389856391  
"5965", "PAQR3", 84.7538729012869, -0.402379673002735, 0.375029921477847, -1.07292685185522, 0.283303937183397, 0.731999095009243  
"5966", "CEP72", 3.95585118332714, 0.802221442887819, 0.747839573881269, 1.07271862964447, 0.283397379112239, 0.731999095009243  
"5967", "AKAP10", 72.3615048656511, 0.24928038765501, 0.232333615290017, 1.07294154289227, 0.283297345212782, 0.731999095009243  
"5968", "SUGP2", 168.176099108376, 0.294916824042311, 0.274921669913383, 1.07273036765427, 0.283392111000472, 0.731999095009243  
"5969", "NPEPL1", 179.948680815353, -0.203917179528982, 0.19013413599121, -1.07249115718184, 0.283499483653902, 0.732066661175364  
"5970", "CU638689.5", 3.91171072549743, -0.788546785792222, 0.73527688974588, -1.07244875609344, 0.283518518794481, 0.732066661175364  
"5971", "AC073352.2", 2.94155867035183, -1.19607007275333, 1.11559869318639, -1.07213290949373, 0.283660339196798, 0.732187563415713  
"5972", "NAE1", 202.184348699031, -0.233943668780453, 0.218194598652352, -1.07217901004596, 0.283639636284625, 0.732187563415713  
"5973", "AC026471.2", 3.3105775574902, -0.885344826103792, 0.825892406255066, -1.07198567198155, 0.283726467715267, 0.732235643701798  
"5974", "EIF3A", 657.513814864123, -0.226824318349625, 0.211626559348486, -1.07181404379453, 0.283803563948857, 0.732312008415071  
"5975", "AC005072.1", 4.62534793382523, 0.983540882139354, 0.918061081485068, 1.07132401315647, 0.28402376620569, 0.732634932406412  
"5976", "ZNF202", 12.6333490787547, 0.452983300993989, 0.422816936853249, 1.07134615837589, 0.284013812440807, 0.732634932406412  
"5977", "AC046134.2", 18.438964458433, 0.488789212268754, 0.456528548702072, 1.07066516137578, 0.284320012902018, 0.732841238011691  
"5978", "SNX8", 55.4560665446551, 0.311072308808888, 0.290447551983689, 1.07101026221202, 0.284164815386579, 0.732841238011691  
"5979", "EI24", 409.829678985775, -0.209779287422124, 0.195942329131992, -1.07061750440258, 0.284341449532788, 0.732841238011691  
"5980", "IFT20", 323.868726762429, -0.244370129695279, 0.228226194801413, -1.07073655549449, 0.284287901088712, 0.732841238011691

"5981", "ADAT3", 6.332207593647, -0.956140146212155, 0.893003700032356, -1.07070121453865, 0.284303796519489, 0.732841238011691  
"5982", "CCND2", 211.807691788755, -0.289468651291315, 0.270407446783002, -1.07049067891836, 0.284398502359176, 0.732865749559795  
"5983", "AC005070.3", 8.33694122970248, 0.62176677785813, 0.581184023701222, 1.06982771807535, 0.284696863377177, 0.733144361670429  
"5984", "AC090517.5", 26.3025618326082, 0.385769764291196, 0.360557316082928, 1.06992632539585, 0.284652472422295, 0.733144361670429  
"5985", "RPS15A", 11828.8443692059, -0.256284508331867, 0.239533136937943, -1.06993341968491, 0.284649278902207, 0.733144361670429  
"5986", "SCAF4", 87.4883427063655, 0.268532493553351, 0.250958660927241, 1.07002680266614, 0.284607244472262, 0.733144361670429  
"5987", "CD68", 382.09356324146, -0.277755375533528, 0.259734432175732, -1.06938218859486, 0.284897489820724, 0.733538467610901  
"5988", "SEC14L1", 161.564054273846, -0.190005792633906, 0.177739358071799, -1.06901360900129, 0.285063537215197, 0.733843424544466  
"5989", "ZNF280C", 19.5498802322841, 0.382214595296868, 0.357888057425545, 1.0679724773336, 0.285532926992359, 0.734929048186211  
"5990", "ANKRD35", 330.340634175784, -0.309379934545112, 0.289781111612282, -1.06763319673869, 0.285686003014883, 0.735200289895563  
"5991", "SEPHS2", 244.515911408043, -0.352533153251106, 0.330263981378649, -1.06742840009224, 0.285778429646963, 0.735315388584199  
"5992", "TNS2", 412.743565970509, 0.260823413065765, 0.244390093073055, 1.06724216921427, 0.285862494917389, 0.735408938443183  
"5993", "AP003696.1", 2.68695942162112, 1.29288418991142, 1.21209484153475, 1.06665266248834, 0.286128710484894, 0.735970978161963  
"5994", "FNTB", 22.2743269459757, 0.388412680851075, 0.364305085869005, 1.06617419277736, 0.286344905912979, 0.73640419163306  
"5995", "BLOC1S3", 26.56772560516, -0.354696021035464, 0.332761589313791, -1.06591635701376, 0.286461454144374, 0.736581036803256  
"5996", "GVQW3", 38.2624004179396, 0.338396535096547, 0.317556702665312, 1.06562554736311, 0.286592945842596, 0.736796240854505  
"5997", "LAMTOR5-AS1", 2.65268070175074, 1.01099981139633, 0.949635965550958, 1.06461828329108, 0.287048702672943, 0.736870313152177  
"5998", "AL512343.2", 3.56739971662301, 0.927351447627524, 0.870791775539766, 1.06495200537775, 0.2868976492578, 0.736870313152177  
"5999", "CXCL1", 36.7918203407565, -0.603900200004808, 0.567197629963697, -1.06470860966655, 0.287007812734657, 0.736870313152177  
"6000", "SNHG6", 1294.47502802886, -0.266749048599481, 0.250520234061499, -1.06478045415684, 0.28697529218735, 0.736870313152177  
"6001", "PRXL2A", 153.033776607317, 0.343426147977839, 0.322464159551266, 1.06500563800871, 0.286873378399798, 0.736870313152177  
"6002", "MS4A4E", 2.54724738161592, -1.07099568581444, 1.0054221369304, -1.06521991756044, 0.286776422376085, 0.736870313152177  
"6003", "SLIRP", 494.393266032544, -0.269981855940712, 0.253596706479295, -1.06461104991817, 0.287051977325905, 0.736870313152177  
"6004", "TRAPPC8", 93.1045168778042, 0.236057956774499, 0.221677426724912, 1.06487142268858, 0.286934118674837, 0.736870313152177  
"6005", "BRWD3", 55.4837376290025, 0.348270111887383, 0.327119455590486, 1.

06465728630759,0.287031045875555,0.736870313152177  
"6006","AC019171.1",8.20117440480945,0.592504360026666,0.5566272418019  
84,1.06445447784506,0.287122865957737,0.736929566889529  
"6007","ELOC",465.532318060338,-0.276546336624064,0.259931303977003,-1  
.06392086059989,0.287364552054627,0.737427096707522  
"6008","AL357873.1",7.3091364382632,0.599077118091978,0.56324825138678  
2,1.06361114591476,0.287504891078755,0.737541670157932  
"6009","CELF2-  
AS2",4.77378530529433,1.04257626779865,0.980139765259206,1.06370163190  
24,0.287463884963972,0.737541670157932  
"6010","PI4KB",150.400035845682,0.224167296264513,0.210806160515257,1.  
06338114463353,0.287609139998826,0.737623656683146  
"6011","AC091607.2",26.6849962337592,-0.55527968297268,0.5225850107242  
92,-1.06256335634861,0.287980012051277,0.737623656683146  
"6012","CERCAM",585.783665887343,0.311809772727345,0.293386416260481,1.  
.06279553328232,0.287874685601486,0.737623656683146  
"6013","DIP2C",158.603133482703,0.275210762164212,0.258976917246141,1.  
06268452451553,0.287925041191755,0.737623656683146  
"6014","ABLIM1",1532.7154946395,0.301524860961688,0.283622257837267,1.  
06312129118827,0.287726950200785,0.737623656683146  
"6015","CDADC1",115.463959972461,-0.233566402790637,0.219791160326235,  
-1.06267423332201,0.287929709764707,0.737623656683146  
"6016","ARL17B",24.2367674676574,0.539384158325652,0.507533225202983,1.  
.06275635079837,0.287892458808593,0.737623656683146  
"6017","RTCB",260.446589128851,-0.261495370621277,0.246036511375119,-1  
.06283156576948,0.287858341888779,0.737623656683146  
"6018","TIMP3",7786.61233695968,-0.205592693764161,0.193501656172413,-  
1.06248544757143,0.288015360984486,0.737623656683146  
"6019","FAM118A",57.9802346550598,0.347599511973201,0.327015067125293,  
1.06294647224931,0.287806226478239,0.737623656683146  
"6020","ALG14",79.7407120223956,-0.286109015294144,0.269353562087484,-  
1.06220616901,0.288142099882801,0.737744352922809  
"6021","SNX1",229.267185263099,0.183800873160804,0.173058896821891,1.0  
6207121700289,0.288203355683987,0.737744352922809  
"6022","PCTP",46.0969335898961,0.339125618402893,0.319307706297238,1.0  
6206524839462,0.28820606508603,0.737744352922809  
"6023","CEP120",74.2735570005697,0.316824980379721,0.298448871802768,1.  
.06157204906138,0.288430008330453,0.737865404873726  
"6024","LY6G5C",4.44368804941659,-0.819878480579858,0.772441681192589,  
-1.06141149622329,0.288502934631281,0.737865404873726  
"6025","ALDH1A1",587.440938047813,0.638577136146564,0.601735209496604,  
1.06122614410545,0.288587140716044,0.737865404873726  
"6026","AP004609.3",13.0161931786004,-0.477444809518238,0.449874728422  
206,-1.06128390717284,0.288560896985302,0.737865404873726  
"6027","DHRS7",596.180167353142,-0.207839305947758,0.195868235515239,-  
1.06111797760892,0.288636288769936,0.737865404873726  
"6028","MLX",158.414875175613,-0.213663546905654,0.201237175045982,-1.  
06174988223141,0.288349247465114,0.737865404873726  
"6029","GPX4",7125.86508163967,-0.311790719395562,0.293823950667623,-1  
.06114807416861,0.288622613106424,0.737865404873726

"6030", "SBF1", 74.9249278741751, 0.24685001723227, 0.232581143128877, 1.06  
135009017256, 0.288530829769873, 0.737865404873726  
"6031", "C3orf18", 30.5380963731485, 0.31402277715711, 0.296048413039197, 1  
.06071427282244, 0.288819771586454, 0.737967309631225  
"6032", "THG1L", 78.3872428019798, -0.231446050912376, 0.218180088910326, -  
1.06080280775531, 0.288779525953386, 0.737967309631225  
"6033", "CD248", 3135.61965461353, 0.308053847685509, 0.29037519334701, 1.0  
6088210957253, 0.2887434806588, 0.737967309631225  
"6034", "AC113383.1", 5.92950635927054, -0.826410683602536, 0.779356663156  
874, -1.06037546436706, 0.288973819835388, 0.73811622746686  
"6035", "GRK6", 49.7825215559033, -0.297266276644657, 0.280323049133927, -1  
.06044179229313, 0.288943657727404, 0.73811622746686  
"6036", "IRF2BP1", 94.60992205234, -0.234310597684921, 0.221084723673188, -  
1.05982264985112, 0.289225290458131, 0.738636158451306  
"6037", "GRPEL1", 101.004535215666, -0.263014136989772, 0.248285623430486,  
-1.05932084732006, 0.289453683766919, 0.739050556412208  
"6038", "GRB10", 57.3164780184512, 0.253696374780962, 0.239524370365376, 1.  
05916727552177, 0.289523605593552, 0.739050556412208  
"6039", "ATP5F1B", 817.62776942798, -0.230113831746044, 0.217262701786456,  
-1.05915018939707, 0.289531385674559, 0.739050556412208  
"6040", "PSMG4", 177.26898020236, -0.285259487524444, 0.269433108439327, -1  
.05873954829378, 0.289718411392327, 0.739405515167668  
"6041", "FZD3", 15.0461622001065, 0.451067448781125, 0.426127950125018, 1.0  
5852584569679, 0.289815774013303, 0.739418116428529  
"6042", "TVP23A", 2.98147552565725, 1.32143047273856, 1.24837772646815, 1.0  
585181429639, 0.289819283779512, 0.739418116428529  
"6043", "MAFG-  
DT", 9.42409783436728, -0.494193593922429, 0.46695497617269, -1.0583324284  
7736, 0.289903913632839, 0.73951163803578  
"6044", "CCDC39", 17.2089393877401, 0.488153762786194, 0.461308774823618, 1  
.05819310064683, 0.289967416068199, 0.739551243992602  
"6045", "LINC02482", 38.4942663303051, 0.453565160327703, 0.42879112442869  
2, 1.0577764661804, 0.29015736438253, 0.7396836110566  
"6046", "LRRC17", 437.77329731806, 0.4575100772997, 0.432498519934646, 1.05  
783038834175, 0.290132775948963, 0.7396836110566  
"6047", "CTDNEP1", 555.482953798182, -0.182852739948769, 0.17286731577244,  
-1.05776351724853, 0.29016326928701, 0.7396836110566  
"6048", "EDRF1", 67.7405027403084, 0.337692979549276, 0.319313373449214, 1.  
05755977553187, 0.290256189171547, 0.739798140886144  
"6049", "ITPRID2", 110.842270532544, 0.234651344457705, 0.221905351439117,  
1.05743887173485, 0.290311338876795, 0.739816381019309  
"6050", "SLC45A1", 10.1508462899557, -0.526607331328545, 0.498436010168369  
, -1.05651943396036, 0.290730966856125, 0.739832440221344  
"6051", "FAM49A", 84.306217951841, 0.262400347478797, 0.248226415493156, 1.  
05710082046458, 0.290465576813768, 0.739832440221344  
"6052", "SEC13", 304.073233210599, -0.225305208876488, 0.213199565430899, -  
1.0567808073207, 0.290611635540015, 0.739832440221344  
"6053", "AL356599.1", 55.2904128648274, 0.314464557413252, 0.2976060888838  
92, 1.05664692074206, 0.290672758010587, 0.739832440221344  
"6054", "PLAG1", 4.88249860262999, -0.838422125980991, 0.793423990407291, -

1.05671385806043,0.290642198420234,0.739832440221344  
"6055","TOMM5",682.484072856203,-0.26930712790044,0.254847293580867,-1  
.05673921082856,0.290630624421619,0.739832440221344  
"6056","MTG1",138.707095480352,-0.252406388437576,0.23893265825861,-1.  
05639132916013,0.290789465778992,0.739832440221344  
"6057","CEP57",266.613605089808,0.174712767895562,0.165405645806484,1.  
05626846679687,0.290845578186269,0.739832440221344  
"6058","ARID4A",280.602095502343,0.208491758688135,0.197307365695575,1  
.05668512654422,0.290655315253467,0.739832440221344  
"6059","UBE20",51.0624553968543,0.277128656777148,0.26211583983758,1.0  
5727550440626,0.290385869325616,0.739832440221344  
"6060","TXNL4A",384.931193039198,-0.242289761397809,0.229372866276738,  
-1.05631396307132,0.290824798756908,0.739832440221344  
"6061","CRYBG1",42.4491289837941,-0.498106149698846,0.471656088570477,  
-1.05607912580655,0.290932066272638,0.739930341790582  
"6062","MIR210HG",4.63884808215763,-0.754632549499359,0.71463523796823  
4,-1.05596884873021,0.290982447135159,0.739936394356397  
"6063","TPD52L1",16.1939419678468,-0.614074081179939,0.581607585580632  
, -1.05582199476799,0.291049547515708,0.739984953810761  
"6064","MEIS1",71.6577797449973,0.277438505617127,0.262869845016715,1.  
05542157412344,0.29123256022098,0.740084016795182  
"6065","SPEGNB",4.06171126675723,-0.900694393982434,0.853737453652411,  
-1.05500161686609,0.291424585270629,0.740084016795182  
"6066","MEF2C",59.5801640357911,-0.35542613203142,0.336842797103326,-1  
.05516916225581,0.291347965100799,0.740084016795182  
"6067","SEMA6A",62.0012027551218,0.46837184296964,0.443787779433186,1.  
0553959903264,0.291244255953364,0.740084016795182  
"6068","PHF3",561.753289891675,0.228032932040611,0.216126038687911,1.0  
5509235918534,0.291383086225953,0.740084016795182  
"6069","DRD4",3.09100511777881,0.896736769374125,0.849566302307175,1.0  
5552299677947,0.291186197566576,0.740084016795182  
"6070","MYEF2",3.54390280191591,0.902708955647806,0.855598233503214,1.  
05506173376691,0.291397091657084,0.740084016795182  
"6071","TMEM222",167.681654762683,-0.267376404656767,0.253899768903162  
, -1.05307856644306,0.292304985291467,0.740158573068232  
"6072","NDC1",29.178785230501,0.377340297417938,0.358158505494573,1.05  
355671198392,0.292085916720818,0.740158573068232  
"6073","AC253572.2",36.4876459624895,-0.42112754471583,0.3992952001994  
54,-1.05467720249447,0.291572981686877,0.740158573068232  
"6074","NBPF15",30.9315138580664,0.344742553924962,0.327246644291218,1  
.0534639848535,0.292128392232711,0.740158573068232  
"6075","MRPL53",26.0363778176794,-0.465353225882154,0.442056467700982,  
-1.05270086489704,0.292478112146917,0.740158573068232  
"6076","AC007405.1",4.20019909166752,0.92908007519358,0.88170974995298  
1,1.05372553183531,0.292008596074074,0.740158573068232  
"6077","FOXP1-  
IT1",6.02291666992022,0.707288494259419,0.671404635887621,1.0534459496  
6098,0.292136654094436,0.740158573068232  
"6078","CCDC58",63.9030029597887,-0.301464101223444,0.286152660854217,  
-1.05350794335974,0.292108255644727,0.740158573068232

"6079", "KPNA4", 347.445517838274, -0.185581762080892, 0.176240925528242, -1.05300038299647, 0.292340816545292, 0.740158573068232  
"6080", "UTP15", 26.933020698221, -0.393829056713236, 0.373463074403669, -1.05453278705555, 0.291639057775664, 0.740158573068232  
"6081", "HULC", 10.6473285598944, 0.540639342723801, 0.513095345723065, 1.05368202465746, 0.292028521343638, 0.740158573068232  
"6082", "IPCEF1", 2.38227364472994, 1.08743923444817, 1.03296520115818, 1.05273559383115, 0.292462190589749, 0.740158573068232  
"6083", "HOXA-AS3", 3.79069474144731, 0.848555271375365, 0.806237603576955, 1.05248783684941, 0.292575788065936, 0.740158573068232  
"6084", "AC100810.1", 370.22619161185, 0.263784240114456, 0.250282018166335, 1.05394803049393, 0.291906711174572, 0.740158573068232  
"6085", "SH3GLB2", 222.920088994357, -0.186645681495578, 0.177137605882345, -1.05367621158631, 0.292031183663405, 0.740158573068232  
"6086", "ATP5F1C", 868.902686392376, -0.283320497183869, 0.268614297913357, -1.05474838601203, 0.291540415960248, 0.740158573068232  
"6087", "HPS1", 174.995611411666, -0.198749721353894, 0.188787037038382, -1.05277207837891, 0.292445464794564, 0.740158573068232  
"6088", "MCRS1", 120.225292802438, -0.250837798758519, 0.238119522858299, -1.05341131104059, 0.292152522371509, 0.740158573068232  
"6089", "EID3", 50.1616905301383, -0.321137193645595, 0.305123038049188, -1.05248425585558, 0.292577430181809, 0.740158573068232  
"6090", "POP5", 149.648929488631, -0.300153722975781, 0.285069522966006, -1.05291410969798, 0.292380358779175, 0.740158573068232  
"6091", "AL139383.1", 3.89670405550252, 0.90343518964798, 0.857361559319425, 1.05373885711079, 0.292002493592383, 0.740158573068232  
"6092", "AC000403.1", 6.00343289988953, 0.679116512356234, 0.644895183694373, 1.05306494687372, 0.292311226889632, 0.740158573068232  
"6093", "ZNF652", 232.386537314924, 0.200616813617284, 0.190315891069807, 1.05412539378385, 0.291825511432823, 0.740158573068232  
"6094", "TSP0", 1933.12368901257, -0.290183595978515, 0.275729505513098, -1.05242126858538, 0.292606314906118, 0.740158573068232  
"6095", "TMEM119", 296.97375479799, -0.232064982306819, 0.220560613499859, -1.05215966996287, 0.292726299384278, 0.740340591469834  
"6096", "GNG12", 671.696611155301, 0.204557682756409, 0.194548260297321, 1.05144956034966, 0.293052163841095, 0.740729954368613  
"6097", "CP", 397.727739560523, -0.480231557736059, 0.456797532701762, -1.05130068215495, 0.293120513892218, 0.740729954368613  
"6098", "OTUD4", 90.5182071696833, 0.239464349490572, 0.22768909049268, 1.05171639524938, 0.292929686580848, 0.740729954368613  
"6099", "PHACTR1", 72.5707741454085, 0.396734093256199, 0.377306373186367, 1.051490569602, 0.293033338352899, 0.740729954368613  
"6100", "AP001527.2", 6.24369960289816, -0.704984675176828, 0.670524032404788, -1.0513935983002, 0.29307785479011, 0.740729954368613  
"6101", "VAMP4", 118.297671243776, 0.192827306869263, 0.183612886698524, 1.05018395133599, 0.293633546665657, 0.74081196756974  
"6102", "FAM228B", 90.5161351770244, -0.275944467247993, 0.262630898050232, -1.05069308027578, 0.293399575141801, 0.74081196756974  
"6103", "MPV17", 215.702653009439, 0.223343594960327, 0.212640222662056, 1.



0503355957978,0.293563844975578,0.74081196756974  
"6104","MED22",54.7468984889752,0.285838277881831,0.272083775932008,1.  
05055245173185,0.293464188845713,0.74081196756974  
"6105","LINC02328",28.1311224801118,0.354812730779191,0.33760234147281  
1,1.0509782877432,0.29326856199157,0.74081196756974  
"6106","NAA60",116.301035920441,0.197677997796992,0.188216487869045,1.  
05026929380666,0.293594318582542,0.74081196756974  
"6107","EZH1",248.926909746482,0.209113536200632,0.199055236664917,1.0  
505301930471,0.293474416777321,0.74081196756974  
"6108","AC008735.2",4.41456157703938,1.2689836515743,1.20810940429201,  
1.05038802534441,0.293539748900198,0.74081196756974  
"6109","RTF2",495.711664227914,-0.212470269345929,0.202173368026278,-1  
.05093104705221,0.293290259803209,0.74081196756974  
"6110","HMGXB4",197.772191421166,0.159760356137179,0.152103284937472,1  
.05034126122164,0.293561241141641,0.74081196756974  
"6111","ERRFI1",1506.6273384961,0.369350317798442,0.351843710640097,1.  
04975677162595,0.293829954750338,0.740822497951662  
"6112","COL25A1",4.81939607280542,0.883934488129665,0.841819169795355,  
1.05002893714638,0.293704808687599,0.740822497951662  
"6113","ABCD2",3.20405452469126,1.05779780706112,1.00764641775504,1.04  
97708208181,0.293823493831585,0.740822497951662  
"6114","NACA2",3.90539196643401,-0.956013659655781,0.910662388570711,-  
1.04980031200833,0.293809931782792,0.740822497951662  
"6115","MROH8",9.55238439498262,-0.660094343530551,0.628889201941947,-  
1.04961945839147,0.293893107145557,0.74086054728516  
"6116","SASS6",56.9074694429513,-0.28858688215026,0.27511016801907,-1.  
04898660863111,0.294184281798637,0.74111573838214  
"6117","TASOR2",160.515609420393,0.256776849251939,0.24474417193739,1.  
04916430581083,0.294102503668181,0.74111573838214  
"6118","TUB",50.8124673812354,0.33650815942855,0.320795143603966,1.048  
9814641458,0.294186649572515,0.74111573838214  
"6119","UCKL1-  
AS1",2.92256014897525,1.08286001783708,1.0320089075732,1.0492739063497  
5,0.294052071936551,0.74111573838214  
"6120","POC5",33.1065998787109,0.325672793643741,0.310498747388896,1.0  
4886991133603,0.294237995427236,0.741123970508308  
"6121","COX7A2L",731.879408505833,-0.253013089973345,0.241252621546738  
, -1.04874752593861,0.294294334248712,0.741144774129047  
"6122","ARPC4",433.213143858099,-0.202845477076473,0.19359964451016,-1  
.04775748731206,0.29475035392195,0.741399325139288  
"6123","HMGCR",42.9907357982581,0.260578748110347,0.248699503258012,1.  
04776545468211,0.294746682198874,0.741399325139288  
"6124","SEMA3A",57.3977975541165,0.631341831022442,0.602451990251414,1  
.04795376434722,0.294659909544572,0.741399325139288  
"6125","HNRNPC",877.276800296329,0.155429662485812,0.148354237808538,1  
.04769277090962,0.294780179291514,0.741399325139288  
"6126","BTG3-  
AS1",4.77186646556756,-0.860848796272278,0.821548114869724,-1.04783734  
597064,0.294713552840256,0.741399325139288  
"6127","TBC1D22A",104.322321767603,0.227970192792876,0.217442953056334

,1.04841380044086,0.294447997992959,0.741399325139288  
"6128","NAP1L2",3.11765599719721,0.965722295286234,0.921455770105559,1  
.04803977208326,0.294620283076506,0.741399325139288  
"6129","KLHL4",25.4480487060502,-0.559634990423805,0.533957185280722,-  
1.04808963312214,0.294597312163794,0.741399325139288  
"6130","RMND5B",122.210677643745,-0.231285235794869,0.220781178402585,  
-1.04757677927206,0.294833640559828,0.741412817166353  
"6131","PUS3",58.7691116805614,-0.314866844630131,0.300636607379753,-1  
.04733368093262,0.294945707174526,0.741573654558036  
"6132","NR4A3",38.3043395625946,-0.635216598123475,0.606773526121339,-  
1.04687592780119,0.29515680558751,0.741741466927203  
"6133","FAM111A",127.669352089661,0.23923932072693,0.228515933567498,1  
.04692621206768,0.295133611440634,0.741741466927203  
"6134","BRMS1L",76.6179061021925,-0.231733928024111,0.221318227843197,  
-1.04706209823934,0.295070938622616,0.741741466927203  
"6135","TMEM165",569.039663419812,-0.153687017408964,0.146848524296631  
, -1.04656834752061,0.295298706804316,0.741977109272784  
"6136","HMGCL",175.915164700188,0.267990116033417,0.256195568943009,1.  
04603727979789,0.295543820804874,0.742074557152055  
"6137","ACY1",42.81909973377,0.398254999557879,0.380614264378689,1.046  
34806635003,0.295400360920867,0.742074557152055  
"6138","SNHG7",700.207350219501,-0.317847415874378,0.303826303895491,-  
1.04614844665889,0.295492500533226,0.742074557152055  
"6139","SNHG21",24.3795586756508,-0.418159869348089,0.39969233568197,-  
1.04620437275738,0.295466684460888,0.742074557152055  
"6140","H3F3B",9505.2069908554,-0.212983857134385,0.203624687961999,-1  
.04596284107815,0.295578188836433,0.742074557152055  
"6141","GPC3",5239.29229375523,0.261011153330291,0.249573645958279,1.0  
458281856167,0.295640365473158,0.742109792178591  
"6142","INPP5D",5.26998768730766,-0.72250794606415,0.690975828742834,-  
1.04563418286091,0.295729960889048,0.742150969674742  
"6143","CASS4",3.55278362773427,-0.832207734706878,0.795926100740607,-  
1.04558417412435,0.295753059144466,0.742150969674742  
"6144","TYW3",200.303561028818,-0.204910687916633,0.196072173523896,-1  
.0450778620642,0.295986984805854,0.742375426420801  
"6145","ALAD",63.8363418828469,0.251415855549747,0.24052762839445,1.04  
526809343266,0.29589907982827,0.742375426420801  
"6146","EXOC5",178.960189958588,0.178346768443494,0.170642013391026,1.  
04515157140588,0.295952922008372,0.742375426420801  
"6147","ESD",1108.72205841157,-0.252435533592835,0.241578486969028,-1.  
04494210871185,0.296049726447365,0.74241199498717  
"6148","AC008494.3",2.40905708447998,-0.958456731210115,0.917658039020  
536,-1.04445958129798,0.296272810017661,0.742850580094704  
"6149","SLC25A22",13.978781488487,0.451580200326644,0.432442988962536,  
1.04425372095873,0.296368018231147,0.742968450322513  
"6150","NDUFS8",391.831750798176,-0.298213485813241,0.285706688293384,  
-1.04377495533816,0.29658952138918,0.74328588064004  
"6151","NDUFA11",1281.16199461918,-0.249669424213828,0.239223169226537  
, -1.04366740488,0.296639295342039,0.74328588064004  
"6152","ZNF66",25.617635344094,0.463876868343421,0.444448726572605,1.0

4371289781982,0.296618240696498,0.74328588064004  
"6153","LINC02447",8.5791845662311,0.535991439560178,0.513795841433766  
,1.04319925607898,0.296856017961999,0.743356152476101  
"6154","SETDB2",54.7586349039756,0.298717350820567,0.286320072406245,1  
.04329867029627,0.296809986754871,0.743356152476101  
"6155","GRN",1107.67509969222,0.280550815552749,0.268935451525709,1.04  
319015570891,0.296860231893797,0.743356152476101  
"6156","STARD8",6.4266450868892,0.759057021433032,0.727470930740947,1.  
04341904172022,0.296754258239684,0.743356152476101  
"6157","LMX1A",17.908620805406,0.384240816637723,0.368404648360221,1.0  
4298579930517,0.296954869784301,0.743472359546045  
"6158","MCM2",17.9420177409032,0.42154179106128,0.404402670353067,1.04  
238132427081,0.297234921563902,0.743847399644305  
"6159","NDUFA8",263.431372388471,-0.296169446909944,0.284130825049652,  
-1.04236999578693,0.297240171707298,0.743847399644305  
"6160","PIP5K1C",105.553628069116,-0.254265734380357,0.243935079732411  
, -1.04235001648503,0.297249431190977,0.743847399644305  
"6161","ZSWIM5",5.93631617787894,0.740956292593562,0.711459222053404,1  
.04145995951114,0.297662127141463,0.74387525049038  
"6162","HSPE1",677.346910530779,-0.279179628423352,0.267977274711155,-  
1.04180337203694,0.29750285046272,0.74387525049038  
"6163","AC012467.2",7.52501195994786,0.661229024745338,0.6350701851247  
66,1.04119047033429,0.29778715764995,0.74387525049038  
"6164","ATXN7",174.462558157302,0.350622255295001,0.336859628233393,1.  
04085567372316,0.297942536658079,0.74387525049038  
"6165","HEG1",428.395609285021,0.254216969327781,0.244120520895304,1.0  
4135845850012,0.297709214795121,0.74387525049038  
"6166","MRPS22",204.2193659818,-0.270913971619738,0.260302613257375,-1  
.04076546996426,0.297984409456899,0.74387525049038  
"6167","EIF4A2",1681.28767116733,0.202063218264743,0.194001199366032,1  
.04155654153199,0.29761732609338,0.74387525049038  
"6168","UBE2D3-  
AS1",36.6910830591198,-0.279638895169911,0.268547491724521,-1.04130145  
984297,0.297735659403997,0.74387525049038  
"6169","RPP21",299.617313917332,-0.266448306980709,0.255825939235446,-  
1.04152185574695,0.297633415106856,0.74387525049038  
"6170","BLVRA",170.919772982581,-0.256485227513963,0.246375530212433,-  
1.0410336906949,0.297859912292124,0.74387525049038  
"6171","USP54",39.344376580923,0.343463970443701,0.329995518353429,1.0  
4081404546787,0.297961860104426,0.74387525049038  
"6172","FAM24B",21.7582945651818,-0.384159067995027,0.368644353110296,  
-1.042085860678,0.297371873336757,0.74387525049038  
"6173","SNHG1",70.1306934304703,-0.27452540938061,0.26366271991817,-1.  
04119918608824,0.297783113394367,0.74387525049038  
"6174","SLX4",22.2104651517154,0.434636200541034,0.417519358217435,1.0  
4099652384186,0.297877161560635,0.74387525049038  
"6175","WDR45",370.981798556987,-0.258961857911394,0.248699848033636,-  
1.04126263027057,0.297753675338748,0.74387525049038  
"6176","AP003469.4",11.0918168789622,0.558936146392907,0.5371837534998  
38,1.04049339309193,0.298110731997978,0.743949641209136

"6177", "LONRF3", 32.6871860136938, -0.40474087025315, 0.388988167564547, -1.04049661147081, 0.298109237528171, 0.743949641209136  
"6178", "MAP4K2", 13.1412378643766, -0.459687382079003, 0.441920798498083, -1.04020309440357, 0.298245554183548, 0.743955282924308  
"6179", "POLE2", 5.66106877173692, -0.677061778414427, 0.650910299568583, -1.04017677837204, 0.298257778039068, 0.743955282924308  
"6180", "USP8", 398.0786423921, 0.173466900292853, 0.166747668239561, 1.04029580817669, 0.298202491094577, 0.743955282924308  
"6181", "ITGB5", 846.213056366721, -0.220396675707865, 0.211965242548684, -1.03977743264792, 0.298443316087916, 0.74407974842877  
"6182", "FOXCI", 82.2814672783381, -0.274193837672362, 0.263758430837942, -1.03956425886091, 0.298542389255956, 0.74407974842877  
"6183", "ZBTB6", 37.5724268112165, 0.364509430591518, 0.350604226413044, 1.03966068612673, 0.298497571670136, 0.74407974842877  
"6184", "OIP5", 3.03803701132675, -0.939538147965483, 0.903793147728993, -1.03954997924725, 0.29854902653467, 0.74407974842877  
"6185", "SLC7A6", 73.5042932162125, 0.31997544500946, 0.307739740419276, 1.03975991067489, 0.298451458650119, 0.74407974842877  
"6186", "TTC30B", 16.5762153090521, -0.401341156073003, 0.386331571813416, -1.038851560045, 0.298873777629858, 0.744523283116759  
"6187", "ASNSD1", 143.850612960669, -0.230691569614067, 0.222042139221019, -1.03895400406154, 0.298826128440316, 0.744523283116759  
"6188", "DAGLB", 27.788497177054, 0.36678077099975, 0.353065408058859, 1.03884652143153, 0.298876121341678, 0.744523283116759  
"6189", "GOLGA2", 532.449067003352, -0.193977047804718, 0.186756730313718, -1.03866161866762, 0.298962137376037, 0.744523283116759  
"6190", "MED13L", 557.386478794797, 0.262347247298612, 0.252585333056869, 1.03864798531095, 0.298968480213606, 0.744523283116759  
"6191", "FLVCR1-DT", 15.8435869255701, -0.515024497710666, 0.495937821185632, -1.03848602729956, 0.299043837079943, 0.744590655562481  
"6192", "INTS3", 94.0756044105767, 0.239531126153987, 0.230748306651197, 1.03806233566891, 0.299241035003877, 0.744841039009326  
"6193", "HCG27", 6.41723237486096, 0.734785415367264, 0.707842370794205, 1.03806362219152, 0.299240436089001, 0.744841039009326  
"6194", "GAPDH", 3571.639141429, -0.313243510021153, 0.301900407927086, -1.03757233112718, 0.299469204988846, 0.744927835227216  
"6195", "GPR162", 4.06100247939968, -0.834865042982385, 0.804560630973105, -1.03766579029927, 0.299425676890497, 0.744927835227216  
"6196", "TMBIM4", 1565.35375980049, -0.2421741939317, 0.233392008010677, -1.03762847749534, 0.299443054618678, 0.744927835227216  
"6197", "AC004687.1", 7.25963577798016, -0.855414785076123, 0.824230409969165, -1.03783453598627, 0.299347095200719, 0.744927835227216  
"6198", "LIME1", 17.8569049473663, 0.408773014505193, 0.394023903959018, 1.03743201972769, 0.29953456218166, 0.744970196197206  
"6199", "RALB", 188.942252623076, -0.207857814896155, 0.200616556188439, -1.03609502049728, 0.300157815069619, 0.745317770505506  
"6200", "CEP57L1", 116.263379726557, -0.191005496923159, 0.184347011764072, -1.03611930074358, 0.30014648893636, 0.745317770505506  
"6201", "SLC12A9", 54.4943031208386, -0.235321952561457, 0.226962323114484

, -1.03683267483456, 0.299813844764098, 0.745317770505506  
"6202", "STX17", 197.916782607726, 0.239793410927547, 0.231390260699645, 1.  
03631592013637, 0.300054781357611, 0.745317770505506  
"6203", "PPP6R3", 157.799331237162, 0.172411367842454, 0.166363338008162, 1.  
.03635434289011, 0.300036862328545, 0.745317770505506  
"6204", "NACA", 9193.6499564735, -0.285090384091303, 0.275110439676266, -1.  
03627613850925, 0.300073334869524, 0.745317770505506  
"6205", "AC022558.1", 3.34296815184816, -0.808558588427534, 0.780048007304  
852, -1.03654977752099, 0.29994572949372, 0.745317770505506  
"6206", "CEP192", 66.9904632946349, 0.239868340868504, 0.231490537171146, 1.  
.03619069617159, 0.300113186389021, 0.745317770505506  
"6207", "ZNF558", 29.6949364184354, 0.321572148960962, 0.310356459151076, 1.  
.03613809050588, 0.300137724173406, 0.745317770505506  
"6208", "POLR2F", 454.709583654834, -0.253804369374365, 0.244840324872256,  
-1.03661179794131, 0.299916812701457, 0.745317770505506  
"6209", "FAAP20", 313.495852701095, -0.233872437289053, 0.225822138853988,  
-1.03564884504203, 0.300365995589949, 0.74547445210418  
"6210", "EFR3A", 193.184705057757, -0.162659040286077, 0.157045226987102, -  
1.03574647511851, 0.300320434255302, 0.74547445210418  
"6211", "PRR14L", 132.906799012616, 0.262354922071423, 0.253284014410017, 1.  
.03581318656266, 0.300289304465469, 0.74547445210418  
"6212", "AL445423.1", 7.30481982051801, 0.609614011621495, 0.5889347866615  
48, 1.03511292833825, 0.300616175576132, 0.74572033971842  
"6213", "IL1R2", 4.81155934096406, -0.727169983784942, 0.702439610512922, -  
1.03520640479537, 0.300572528316979, 0.74572033971842  
"6214", "TAOK2", 51.6719820638489, 0.326321608057693, 0.315279834792413, 1.  
03502213604162, 0.300658573554977, 0.74572033971842  
"6215", "NOL12", 51.1986516133877, -0.36741244514683, 0.354973365764378, -1.  
.03504228931561, 0.300649162081169, 0.74572033971842  
"6216", "SLC6A8", 35.8549703277642, -0.291565516169541, 0.281906893330567,  
-1.03426174764605, 0.301013814410146, 0.746481330298005  
"6217", "PDSS2", 68.7958333634628, 0.218859067391635, 0.211652199707658, 1.  
03405052106206, 0.301112545570807, 0.746606062405338  
"6218", "ROM1", 21.4543208281598, -0.350758251529326, 0.339275174721681, -1.  
.03384590934797, 0.301208205385117, 0.746723140239882  
"6219", "FKBP14", 217.162561660977, 0.30571975447373, 0.295829340513519, 1.  
03343283645578, 0.301401386379274, 0.747081905617706  
"6220", "EPS8L2", 109.219384040384, -0.191999564160677, 0.185839541547459,  
-1.03314699639229, 0.301535112931208, 0.747293209941249  
"6221", "CETN3", 155.609350530596, 0.266752564639382, 0.258317707789507, 1.  
03265303382433, 0.30176629999167, 0.747345525650693  
"6222", "STOML2", 416.453503245134, -0.244262409885039, 0.236509419647443,  
-1.03278089409358, 0.301706446815185, 0.747345525650693  
"6223", "UHRF1BP1L", 136.509595317452, -0.218031975485679, 0.2111729869410  
79, -1.03248042585349, 0.301847112727941, 0.747345525650693  
"6224", "AC233723.1", 16.0452827019058, -0.732694617544393, 0.709420361793  
531, -1.03280742561719, 0.301694028028822, 0.747345525650693  
"6225", "MAP2K6", 53.7319052279198, 0.291574018660753, 0.2823819874966, 1.0  
3255176169572, 0.301813712497395, 0.747345525650693  
"6226", "RRBP1", 1389.95559594026, 0.222119765481792, 0.215031533238869, 1.

03296368740044,0.301620892442919,0.747345525650693  
"6227","ZRANB3",14.8596910473143,0.417423669938409,0.404430193898463,1  
.0321278584932,0.302012224792706,0.747634245251256  
"6228","CUEDC2",331.38024756367,-0.260057561638072,0.252029877764624,-  
1.03185211191883,0.302141402523973,0.747833930620912  
"6229","XRN2",357.131380299847,-0.14220284753012,0.137893648731057,-1.  
03125016154636,0.302423523163338,0.748412041991147  
"6230","HDLBP",1089.58815308603,0.184044111977653,0.178489052684412,1.  
03112268909322,0.302483289120042,0.748439791618851  
"6231","PPP1R3F",28.194713469584,-0.395861071103797,0.383965361330405,  
-1.03098120552379,0.30254963344211,0.748483806693969  
"6232","PHTF1",43.2066678499084,-0.261063817596477,0.253341096870895,-  
1.03048348973368,0.302783098699005,0.748744264834081  
"6233","NUP54",198.584741589293,-0.193278148962618,0.187587305419894,-  
1.03033703975856,0.302851817298249,0.748744264834081  
"6234","MIOS",43.847123193317,-0.285458928105007,0.277057807689607,-1.  
03032262647805,0.30285858099031,0.748744264834081  
"6235","POT1",40.034414240381,0.272171140515575,0.264187085237834,1.03  
022121717476,0.302906171975963,0.748744264834081  
"6236","PPFIA1",235.479456249317,0.202222028219175,0.196207998280303,1  
.03065129857897,0.302704370643671,0.748744264834081  
"6237","AC243829.1",4.19261867318752,-0.839343747831168,0.814789564992  
625,-1.03013561279318,0.302946349644513,0.748744264834081  
"6238","RAC1",2538.32479585717,-0.199889044259675,0.194121271427334,-1  
.02971221437987,0.303145120091295,0.748995356019764  
"6239","AC142472.1",20.5936311969758,0.414388060334152,0.4023925149534  
08,1.02981055793777,0.303098943571834,0.748995356019764  
"6240","TMEM214",165.804246171953,-0.224842288085833,0.218401736508847  
, -1.02948947055064,0.303249725165744,0.749013701879497  
"6241","BBS7",92.9827478252434,-0.213854201154388,0.207718516134711,-1  
.02953845970909,0.303226716793447,0.749013701879497  
"6242","GID4",72.2849333405651,0.224879950652531,0.218487932450267,1.0  
2925570364724,0.303359532702284,0.749044881724445  
"6243","ZNF75D",32.0881352287813,0.321811778725242,0.312647885924331,1  
.02931058616891,0.30333375031276,0.749044881724445  
"6244","SSR2",1941.42292942114,-0.249217101463771,0.24236260011377,-1.  
02828200946344,0.303817191189203,0.749076603494942  
"6245","GNAI2",1440.88390193851,-0.173171656801127,0.168327678787067,-  
1.02877707367538,0.303584442423221,0.749076603494942  
"6246","SLC25A36",521.473745288401,0.138199172830485,0.134364044507729  
, 1.02854281691807,0.303694560781667,0.749076603494942  
"6247","SMARCA1",105.533489184241,0.21634822781236,0.210415009072182,  
1.0281976973332,0.303856841381493,0.749076603494942  
"6248","ADTRP",5.99736705810355,-0.77248143519269,0.750947504475897,-1  
.02867568050822,0.303632101608247,0.749076603494942  
"6249","DDX43",2.7252399066647,1.10866597307227,1.0773771359147,1.0290  
4167548627,0.303460091512692,0.749076603494942  
"6250","COPS7A",187.536024517252,0.182810327495055,0.177788581424085,1  
.02824560514936,0.303834310938125,0.749076603494942  
"6251","LDHB",724.267362345116,-0.250959919734957,0.244078242664053,-1

.0281945534997,0.303858319925648,0.749076603494942  
"6252","C19orf12",168.383101222692,0.174159171317011,0.169254111826683  
,1.02898044506801,0.303488864035505,0.749076603494942  
"6253","AC010331.1",2.89059456251314,-1.13860097897481,1.1071468557289  
3,-1.02841007322843,0.303756972114307,0.749076603494942  
"6254","SP2-  
AS1",9.94084145361019,0.523152922727139,0.508867602544699,1.0280727641  
3551,0.303915601113881,0.749098015857128  
"6255","RPS6",14001.485272871,-0.253532505253163,0.246655979331224,-1.  
02787901570675,0.304006741588272,0.749202865161185  
"6256","ATP10A",30.4474633493031,-0.386120657036896,0.375687796186947,  
-1.02777002861375,0.304058017776921,0.749209453969189  
"6257","RANBP1",492.148948664379,-0.262857848036905,0.2558096683193,-1.  
.02755243679378,0.30416040744042,0.749341965909233  
"6258","HIGD1A",265.770197838396,-0.279325840381226,0.271867042334836,  
-1.02743546250525,0.304215460139611,0.749357832862274  
"6259","AL024507.2",3.6513406449058,0.936938466725149,0.91205670965728  
2,1.02728093199075,0.304288198419825,0.749417251740151  
"6260","MARCH7",291.21737512937,0.167636718031713,0.163258918979376,1.  
02681506823459,0.304507552685258,0.749497188815536  
"6261","CCDC146",240.092918015315,-0.471551498666689,0.459177253464192  
, -1.0269487329983,0.30444460523028,0.749497188815536  
"6262","ARHGEF35",31.6573465068808,-0.306253206227308,0.29819417246996  
6,-1.02702612760869,0.304408161326289,0.749497188815536  
"6263","LCP1",34.515085044964,-0.518978407114011,0.505433321333893,-1.  
02679895687204,0.304515140678022,0.749497188815536  
"6264","CXCL2",352.823735301596,-0.886221636975873,0.863223161318797,-  
1.02664256091315,0.30458880524269,0.749528012393762  
"6265","ZNF184",21.3385807768733,-0.445484343711519,0.433955907811101,  
-1.02656591532206,0.304624910648519,0.749528012393762  
"6266","TENT2",110.609141875362,0.208230047077564,0.2029194968904,1.02  
617072419627,0.304811118251146,0.749627215673488  
"6267","ITM2B",10570.9640022272,-0.216707136335154,0.211155041918903,-  
1.02629392301408,0.304753060878117,0.749627215673488  
"6268","ERCC2",25.2726391195209,0.342278614909568,0.333531867102901,1.  
02622462399963,0.304785717096187,0.749627215673488  
"6269","PNRC2",868.388560568193,0.163749552559552,0.159671716701637,1.  
02553887402322,0.305108992648383,0.749642193445143  
"6270","NPL",14.0073012451911,-0.522128158387108,0.509007449913363,-1.  
02577704604516,0.304996688060377,0.749642193445143  
"6271","LINC02767",22.3326156232579,0.431474341188824,0.42072491412711  
5,1.02554977540137,0.305103851752897,0.749642193445143  
"6272","SMIM27",68.7965052435818,0.282380307844532,0.275213633337435,1.  
.02604040512161,0.304872539030029,0.749642193445143  
"6273","FANCG",40.9354332512157,0.348587792041424,0.339879395401756,1.  
02562201992084,0.305069783978686,0.749642193445143  
"6274","TCF4-  
AS2",4.65204106131168,0.765670390305662,0.746440202369033,1.0257625297  
7211,0.305003532092969,0.749642193445143  
"6275","ZFYVE28",30.0595410941373,-0.312772110668863,0.305105048734996

, -1.02512925291029, 0.305302204312748, 0.749925391340842  
"6276", "LARP4", 118.602303444571, 0.303209498569044, 0.295788681247935, 1.02508823965069, 0.305321554074286, 0.749925391340842  
"6277", "EPAS1", 94.0530924483966, 0.27911103479955, 0.272368532653666, 1.02475507019916, 0.305478771177354, 0.750072516358539  
"6278", "IKZF2", 23.5502070655634, 0.410065857278563, 0.400143362845931, 1.02479734853544, 0.30545881776213, 0.750072516358539  
"6279", "LINC02511", 307.235247403091, -0.213361305815796, 0.208270468417869, -1.02444339534356, 0.305625893941512, 0.750314246712599  
"6280", "DAPL1", 3.40522512890239, -0.811234429162201, 0.791991526625907, -1.02429685405635, 0.305695083418468, 0.750364603645809  
"6281", "MTMR10", 46.7724504173258, -0.24310968858537, 0.237391214279232, -1.02408882031924, 0.305793324397274, 0.750366777393183  
"6282", "AC007114.2", 3.49378023077459, -0.900170699904972, 0.878955834708551, -1.02413644048845, 0.305770834601123, 0.750366777393183  
"6283", "ACAP3", 125.353233742982, -0.19257911769804, 0.188205849324183, -1.02323662303568, 0.306195980968648, 0.750731393609889  
"6284", "RPL24", 10124.318669475, -0.255194564736564, 0.249349330101131, -1.02344195042779, 0.306098933256107, 0.750731393609889  
"6285", "ARID5B", 2200.39243348044, -0.261886024756086, 0.255857236020449, -1.02356309647289, 0.306041683307672, 0.750731393609889  
"6286", "SOCS2", 36.8098140043415, 0.414780036972537, 0.405336350685339, 1.02329839470659, 0.306166782527869, 0.750731393609889  
"6287", "ZNF136", 75.8821959592276, 0.223799106434249, 0.218676584730939, 1.02342510383365, 0.306106895008003, 0.750731393609889  
"6288", "TIMP1", 5159.00996091724, -0.296790982770356, 0.290074046491365, -1.02315593676938, 0.306234122803696, 0.750731393609889  
"6289", "CACNB4", 141.758161547724, 0.421088960344879, 0.411864751642097, 1.02239620813873, 0.306593414472248, 0.75086305855332  
"6290", "MASP1", 119.749766464314, -0.701331347405292, 0.685872275069439, -1.02253928741221, 0.306525727932615, 0.75086305855332  
"6291", "GPAT3", 8.49307661849677, -0.807426591703672, 0.78967338166763, -1.02248171262725, 0.30655296365669, 0.75086305855332  
"6292", "AC008264.2", 3.95163685211533, -0.91015834632252, 0.889838403436139, -1.02283554273216, 0.306385609848792, 0.75086305855332  
"6293", "AC048341.1", 20.4051044134342, 0.426270253865103, 0.417005039138921, 1.02221847185663, 0.30667751000011, 0.75086305855332  
"6294", "AL357093.2", 3.69724685099566, -0.802686996304088, 0.785194352998306, -1.02227810635543, 0.306649292365858, 0.75086305855332  
"6295", "AC108134.3", 2.60932380278621, -1.11877874334325, 1.09420852312413, -1.0224547878214, 0.306565700973268, 0.75086305855332  
"6296", "FAM215B", 33.3461263738142, -0.313838611041958, 0.306957442714908, -1.02241733663855, 0.306583418585582, 0.75086305855332  
"6297", "P3H1", 198.735088453489, 0.286439221784111, 0.280556369822222, 1.02096852039259, 0.307269353366048, 0.750946363134815  
"6298", "ALKAL2", 12.4893740291989, 0.96335541426056, 0.943884682782432, 1.02062829478356, 0.307430578688774, 0.750946363134815  
"6299", "CEP97", 59.5054192462929, 0.266235718656676, 0.260541774534404, 1.02185424633898, 0.306849890237218, 0.750946363134815  
"6300", "LHFPL2", 139.22685883977, 0.280180947198741, 0.274466878695618, 1.



02081879070538,0.307340300024307,0.750946363134815  
"6301","AC004918.1",10.6748608167449,0.551222270873449,0.5398946925217  
9,1.02098108855034,0.307263398669023,0.750946363134815  
"6302","SAX01",4.27605330587063,0.735037844943832,0.719267404853408,1.  
02192569826466,0.306816068492007,0.750946363134815  
"6303","PANX1",59.2572749966678,-0.411637099466013,0.403327092956183,-  
1.02060364070492,0.307442263882181,0.750946363134815  
"6304","NCKAP1L",7.52470767356428,-0.632012356153166,0.618828323858636  
,-1.02130483008975,0.30711003873701,0.750946363134815  
"6305","LINC01481",2.57499383182425,-1.04615577153577,1.02466025125583  
,-1.02097819277521,0.307264770658357,0.750946363134815  
"6306","ZNF84",104.609760008515,0.214021421424423,0.209649272368262,1.  
02085458731515,0.307323337472758,0.750946363134815  
"6307","ALG5",276.127410786412,-0.259586660665587,0.254327855594665,-1.  
02067726737453,0.307407368221068,0.750946363134815  
"6308","AC005899.5",4.55988110440077,0.828391634309506,0.8107842675098  
26,1.02171646331244,0.306915116759401,0.750946363134815  
"6309","GALNT1",472.275295103079,-0.13824571273576,0.135441998615681,-  
1.02070047805508,0.307396367967755,0.750946363134815  
"6310","DHPS",216.469698524334,-0.237957395585271,0.233150965377547,-1.  
02061509889072,0.30743683305588,0.750946363134815  
"6311","MORC4",233.553905173597,-0.246568647557451,0.241565381149411,-  
1.02071185193935,0.307390977630334,0.750946363134815  
"6312","ATP11B",122.773463578615,0.216976735368543,0.212621201306736,1.  
02048494710329,0.307498524721184,0.75096479064909  
"6313","TFB2M",49.7101195830199,-0.308299787803336,0.302142989871692,-  
1.02037710004213,0.307549650202744,0.750970672877443  
"6314","SHARPIN",278.572458063052,-0.24988632515498,0.244936740528109,  
-1.02020760387437,0.307630012146131,0.751027515277219  
"6315","SLC2A4RG",568.305352649322,-0.279263853704029,0.27375521627260  
8,-1.02012249303018,0.307670370351971,0.751027515277219  
"6316","EFS",187.671748820984,0.213023144388751,0.208911795603453,1.01  
967983077941,0.307880330244246,0.751421040328539  
"6317","RPL27",6238.7033030382,-0.227583212961101,0.22326165370684,-1.  
0193564778479,0.308033760239795,0.751676494237208  
"6318","C19orf25",109.230527548651,-0.259858839321846,0.25502306321227  
5,-1.01896211287191,0.308220953699968,0.752014245217633  
"6319","RNF212",110.122587170707,-0.21333956852164,0.209585981715355,-  
1.01790953180916,0.308720951385157,0.75287667546309  
"6320","AC024075.2",41.0658707152827,0.405174940148111,0.3980272259725  
02,1.01795785240104,0.308697986370654,0.75287667546309  
"6321","AL022328.4",4.25031651315673,0.809001746792653,0.7947099695689  
17,1.01798363902681,0.308685731390415,0.75287667546309  
"6322","AP003117.1",11.9209172641589,-0.54787788475166,0.5384983916309  
79,-1.01741786654603,0.308954686169154,0.753089261115987  
"6323","BAMBI",19.5662816694469,0.569296969017413,0.559508950140287,1.  
01749394513649,0.308918511205127,0.753089261115987  
"6324","DAD1",1811.38683996539,-0.27842214488837,0.273602527287032,-1.  
01761539869214,0.30886076649048,0.753089261115987  
"6325","DYNC1LI2",583.11494668413,-0.241055021455277,0.23699243943426,

-1.01714224314799,0.309085767073965,0.753170581638504  
"6326","BAIAP2L2",2.55638605374949,1.00689287724659,0.989897180009442,  
1.01716915411052,0.309072967146268,0.753170581638504  
"6327","MXD1",68.3920338283648,0.417471466613317,0.410670882274247,1.0  
1655969447215,0.309362936356297,0.753268986880107  
"6328","TNS1",416.782387600492,-0.258602525512951,0.254306209546592,-1  
.01689426292035,0.309203732856001,0.753268986880107  
"6329","PLD2",50.5746277276253,-0.287804386343389,0.283050879762063,-1  
.01679382372993,0.30925152088731,0.753268986880107  
"6330","BPTF",808.865231430146,0.234023972374907,0.23019749938295,1.01  
662256541541,0.30933301525411,0.753268986880107  
"6331","CTIF",78.9155264100047,0.236979095765602,0.233122356037257,1.0  
1654384330145,0.309370480437104,0.753268986880107  
"6332","AL352979.4",6.29857825109776,-0.666338497764828,0.655783457520  
098,-1.01609531335945,0.309584000616347,0.753431854989105  
"6333","TSHZ2",1557.90978305227,-0.267401209354495,0.26312409348642,-1  
.01625512818459,0.309507910497674,0.753431854989105  
"6334","FOX04",16.3147520073242,0.46528456128183,0.457891339348248,1.0  
1614623666852,0.309559753960859,0.753431854989105  
"6335","ZBTB39",18.1621441635308,0.49867535639255,0.490856646233405,1.  
01592870386729,0.309663338929227,0.753505977836469  
"6336","TMEM143",19.8621412210245,0.453859142013118,0.446915790279722,  
1.01553615218887,0.309850322481683,0.753841969863502  
"6337","CD109",407.523546384762,-0.278977607785802,0.274758126818768,-  
1.01535707429618,0.309935647149457,0.753930566641768  
"6338","TMEM35B",732.095885167725,0.23795170168861,0.234411807223046,1  
.01510117816803,0.310057600081919,0.753986806034344  
"6339","PRKAB2",91.2333951880345,0.222308004519585,0.219105961929809,1  
.01461412807563,0.310289802061957,0.753986806034344  
"6340","PPOX",50.9454975936453,-0.303428640787148,0.299065183439207,-1  
.01459032207548,0.310301154556074,0.753986806034344  
"6341","TMC06",21.4588413665788,0.349480000432459,0.344330813567472,1.  
01495418551607,0.310127666992347,0.753986806034344  
"6342","MACORIS",4.35256766705651,-0.708469644233119,0.698238487928168  
, -1.0146528105824,0.310271355913644,0.753986806034344  
"6343","AP001372.2",22.4419243754797,-0.375364859684001,0.369870823750  
563,-1.01485393164491,0.310175460949102,0.753986806034344  
"6344","FDXR",27.2146544068192,0.365461982647669,0.360048674053332,1.0  
1503493550857,0.310089174641678,0.753986806034344  
"6345","ZNF493",107.115449059579,0.242829956763667,0.239380241858035,1  
.01441102606822,0.310386665207857,0.754075720122792  
"6346","AL390198.1",6.71059887839181,-0.868520103583485,0.856382512438  
459,-1.01417309551367,0.310500164125264,0.754232592182626  
"6347","CLDND1",263.290514248557,-0.203265280880333,0.200509426785904,  
-1.01374426199608,0.310704797777706,0.754254245313911  
"6348","TCAF1",356.423896653457,0.194188809618367,0.191524003324643,1.  
01391369357087,0.310623936650363,0.754254245313911  
"6349","TLCD1",5.34705240337777,-0.822425095451736,0.81106460780642,-1  
.01400688371305,0.310579467626249,0.754254245313911  
"6350","STS",57.5630897458585,0.256778970988551,0.253286650858555,1.01

378801495522,0.310683915371344,0.754254245313911  
"6351","FGF10",52.6188820415589,-0.460374920251619,0.454244138193021,-  
1.01349666741543,0.310822987136909,0.754422350293725  
"6352","TCP1",479.220972843509,-0.190484719831348,0.187990963046004,-1  
.01326530140033,0.310933456593866,0.754452893655665  
"6353","DZANK1",11.5788400638596,-0.488382401666015,0.481978293587097,  
-1.01328712965735,0.310923033231932,0.754452893655665  
"6354","PPP2R5A",125.477307896079,-0.194285076467363,0.191782898389004  
,-1.01304693014538,0.311037745251505,0.754492379453494  
"6355","LSM11",23.1071856705564,0.37390582511009,0.369097862398209,1.0  
1302625455656,0.311047620592083,0.754492379453494  
"6356","ACAP2",348.615259097416,0.154016835012215,0.152052495730284,1.  
01291882301897,0.311098936754031,0.754498129336593  
"6357","NOP53",2265.57824403966,-0.241918464913687,0.238867943084736,-  
1.01277074600114,0.311169676946015,0.754550978468275  
"6358","IL17RA",109.713251764511,-0.252683957564911,0.249567900487035,  
-1.01248580875904,0.311305828629809,0.754762401435751  
"6359","IGSF8",116.44071245673,-0.258502231313637,0.25545394687154,-1.  
01193281403333,0.311570178440493,0.754928371685035  
"6360","ZDHHC21",95.275600277552,0.267252676239959,0.26407490680758,1.  
01203359103974,0.311521992664921,0.754928371685035  
"6361","ITIH5",1275.66478846774,-0.335746877270107,0.331691903325016,-  
1.012225121881,0.311430427163661,0.754928371685035  
"6362","CTDP1",34.8846167181799,0.346657798781672,0.342509374340348,1.  
01211185664426,0.311484573938839,0.754928371685035  
"6363","RPARP-  
AS1",12.9644794926265,-0.41545036146834,0.41059436284468,-1.0118267542  
4479,0.311620895446394,0.754932595207633  
"6364","CCDC121",44.3444097566752,0.295703672667446,0.292359972277797,  
1.01143692949345,0.311807353525769,0.755211929076538  
"6365","LCMT2",11.0297772674802,0.454939911577943,0.449820570892656,1.  
01138085053587,0.31183418284607,0.755211929076538  
"6366","SPRY3",4.11858557487037,0.811750336364003,0.802948544170544,1.  
01096183841089,0.312034694979537,0.755578828638009  
"6367","HSCB",118.67992993023,-0.280499696060125,0.277495437320009,-1.  
01082633562963,0.312099556035789,0.755617191187638  
"6368","TRAM1L1",22.2854606650981,-0.355650604300463,0.351883715303352  
,-1.01070492561403,0.31215767886076,0.755639230470888  
"6369","CNTN4",152.629868078819,0.457616797369868,0.452925826008372,1.  
01035704102554,0.312324261746171,0.755805101227194  
"6370","DHRS4-  
AS1",143.41640230744,0.196231161551414,0.194215439724276,1.01037879290  
132,0.312313844247256,0.755805101227194  
"6371","AL591623.1",2.75241128254307,0.938513205498426,0.9298814247362  
93,1.0092826682333,0.312839089764612,0.755943840658311  
"6372","GCA",42.238297169186,-0.330493524117361,0.327426428159305,-1.0  
0936728282838,0.312798523087666,0.755943840658311  
"6373","RAB43",30.1718750909103,-0.28974536639092,0.287005933824595,-1  
.00954486386334,0.31271339688394,0.755943840658311  
"6374","RWDD4",202.568030033834,-0.171308704548159,0.169691576128452,-

1.00952980964997,0.312720612760962,0.755943840658311  
"6375","BIN3",92.9189357483429,-0.209157286781293,0.207295374993262,-1  
.00898192633623,0.312983302142973,0.755943840658311  
"6376","TRIM22",308.832486719551,0.235812809354712,0.233692944448608,1  
.00907115493412,0.312940510494267,0.755943840658311  
"6377","AMPD3",4.26775266989044,0.799279586380603,0.791680679673288,1.  
00959844910002,0.312687712972606,0.755943840658311  
"6378","CCNK",185.839175203071,0.181858982047301,0.180212958753085,1.0  
0913376765802,0.312910485407033,0.755943840658311  
"6379","GNB5",80.2592668258047,-0.308980074168739,0.306252202315493,-1  
.00890727260938,0.313019107033539,0.755943840658311  
"6380","UQCRC2",402.700784617199,-0.203139767462749,0.201288070485741,  
-1.00919923854672,0.312879091754358,0.755943840658311  
"6381","ZNF771",47.7299344675308,-0.305102430229125,0.302239577764814,  
-1.00947212964458,0.312748261306665,0.755943840658311  
"6382","NR1D1",58.9933801745404,-1.02969097784185,1.01994610125491,-1.  
00955430544315,0.312708871344493,0.755943840658311  
"6383","RGN",28.0612927360778,-0.386810622561583,0.383018106622492,-1.  
0099016622805,0.312542406199519,0.755943840658311  
"6384","PPWD1",130.04111756919,0.204200681477994,0.202446416018507,1.0  
0866533225921,0.313135163279696,0.755987242279799  
"6385","AL021368.3",3.05559732903649,1.03859826961816,1.02964869436417  
,1.0086918725804,0.313122430783046,0.755987242279799  
"6386","TBC1D19",40.5980091478629,0.264484397778569,0.262247163032763,  
1.0085310160077,0.31319960560318,0.756024415968215  
"6387","PPFIBP2",42.4406939921853,-0.354295794335036,0.351356204758341  
, -1.00836640861008,0.31327859293437,0.756096682336514  
"6388","OGFOD1",62.386983203667,0.282924062373135,0.280629310745565,1.  
00817716303929,0.313369419165989,0.756197494746981  
"6389","AC010680.2",2.79181061806344,0.949177374944403,0.9424116839705  
27,1.00717912467444,0.313848702888436,0.756288534473229  
"6390","POMGNT2",98.7863324512487,0.20163439059317,0.200127995016927,1  
.00752716068591,0.313681512297284,0.756288534473229  
"6391","CCDC69",163.954107917618,0.356936032902268,0.354243342575045,1  
.00760124469143,0.313645931165364,0.756288534473229  
"6392","SLC16A9",2.49891755868677,1.20614912243002,1.19753013326816,1.  
00719730462092,0.313839968099832,0.756288534473229  
"6393","HNRNPUL2",293.13183073775,0.224853102848431,0.223074942497217,  
1.00797113441478,0.313468319935154,0.756288534473229  
"6394","PKNOX2",17.839240573119,0.453025247373587,0.449670000433494,1.  
00746157612662,0.313713013523978,0.756288534473229  
"6395","C2CD5",73.0828421057823,0.244897381421003,0.243063556468046,1.  
00754463145197,0.313673121182942,0.756288534473229  
"6396","ACSF2",38.4154899330613,0.342411185401349,0.339922382941614,1.  
00732167866734,0.313780215282956,0.756288534473229  
"6397","MTG2",68.5110700200384,-0.230528931256275,0.22888520021976,-1.  
00718146492188,0.313847578477554,0.756288534473229  
"6398","ITGAL",8.33937788117797,0.77417803540841,0.768807126488608,1.0  
069860290504,0.313941488030198,0.756393879022429  
"6399","NVL",46.079704606023,0.302113701347784,0.300171244531492,1.006

47116221717,0.314188976923597,0.756607695021643  
"6400","AC106845.1",10.509887584944,0.634650988248966,0.63064356231651  
8,1.00635450224486,0.314245071477916,0.756607695021643  
"6401","PGM5",25.0382070845956,0.446149476957951,0.443209981866571,1.0  
066322853989,0.314111513595589,0.756607695021643  
"6402","SLC5A12",4.65357666517697,-0.914264832057467,0.908641373846448  
, -1.00618886435604,0.314324727792319,0.756607695021643  
"6403","ISM1",327.826824040939,0.361725081650469,0.359469884097987,1.0  
0627367591069,0.314283939717533,0.756607695021643  
"6404","CTSZ",1016.08574886361,-0.190195863305286,0.188984490089116,-1  
.00640990811256,0.314218429407015,0.756607695021643  
"6405","WIPF1",304.362784333674,0.181688819436722,0.180616438462845,1.  
00593733872179,0.314445713458231,0.756780745192603  
"6406","TBC1D31",12.400809338758,0.440287370317076,0.438031736160419,1.  
.00514947655718,0.314824879051749,0.757024034955962  
"6407","SMARCA2",397.6379365777,0.185261754236857,0.18430963072944,1.0  
0516589124317,0.314816976275795,0.757024034955962  
"6408","HEXA",694.78295564119,0.307846743647784,0.306189372123833,1.00  
541289696783,0.314698072236236,0.757024034955962  
"6409","SPATA22",7.49053590771905,-0.770896658284883,0.766605741636328  
, -1.00559729260493,0.314609326795913,0.757024034955962  
"6410","AC040904.1",2.42072896430687,-0.957839567717421,0.953158548238  
428,-1.00491106069147,0.314939677987193,0.757024034955962  
"6411","AMZ2",102.875103570993,0.206882935791929,0.205837560181885,1.0  
0507864361159,0.314858982746744,0.757024034955962  
"6412","ARFGEF2",74.8639385632385,0.243447084851434,0.242205069264524,  
1.00512795042103,0.31483524290976,0.757024034955962  
"6413","CLDN5",3.81944348377236,-1.05606381197687,1.05085148723369,-1.  
00496009646129,0.3149160646682,0.757024034955962  
"6414","LINC00957",3.88527848121649,-0.927973695918252,0.9236067217180  
93,-1.00472817498776,0.31502775739799,0.757117692592768  
"6415","C6orf89",341.426810556936,0.162393011012031,0.161646134212207,  
1.00462044331258,0.315079649523806,0.757124364366247  
"6416","CD302",630.380997954468,0.193122468907418,0.192391231945607,1.  
00380078111885,0.315474647826241,0.757129331502648  
"6417","STX18-  
AS1",19.1412948633612,0.449538168939531,0.447646386810992,1.0042260636  
6158,0.315269661981705,0.757129331502648  
"6418","UTP23",171.745923877317,0.175328449962939,0.174662715366168,1.  
00381154383965,0.315469459123943,0.757129331502648  
"6419","ATP5MD",1071.57296939638,-0.267886921664032,0.266749678762804,  
-1.00426333372359,0.315251702013055,0.757129331502648  
"6420","COG4",116.528318614414,0.236596282731769,0.235696533231064,1.0  
038174065964,0.315466632715443,0.757129331502648  
"6421","LDHD",13.4128488505582,0.517314891600015,0.515096363962451,1.0  
0430701475059,0.315230653537553,0.757129331502648  
"6422","OSBPL2",88.0893190328102,0.230844530214172,0.22990560682677,1.  
004083951672,0.315338150109504,0.757129331502648  
"6423","AL022311.1",29.6287204629692,-0.314030877467892,0.312720743123  
867,-1.00418947055106,0.315287296390049,0.757129331502648

"6424", "ZNF436", 128.003200582337, 0.220352469481494, 0.219742222127055, 1.0027771055946, 0.315968417509498, 0.757340535733592  
"6425", "LRRC41", 212.968061585975, 0.180977718522874, 0.180793261334619, 1.00102026583786, 0.316817010812472, 0.757340535733592  
"6426", "NSUN4", 45.629970222898, 0.273170952507608, 0.273506606748843, 0.998772774649852, 0.317904777504837, 0.757340535733592  
"6427", "LINC01750", 2.77179307639558, 0.955742193251474, 0.957343396302482, 0.99832745171984, 0.318120600194085, 0.757340535733592  
"6428", "LHX9", 2.95941089042905, 1.5154914896093, 1.51825283062632, 0.998181237695515, 0.318191482741631, 0.757340535733592  
"6429", "FAM72A", 15.0891288727095, 0.420712999239443, 0.42144920470097, 0.998253157312161, 0.318156615807969, 0.757340535733592  
"6430", "KCTD3", 190.492443252903, 0.183441289099424, 0.183644822527872, 0.998891700698955, 0.317847157051826, 0.757340535733592  
"6431", "ACBD3", 400.072338275129, -0.200364096799239, 0.200026157018414, -1.00168947794559, 0.316493590123161, 0.757340535733592  
"6432", "SIX2", 35.0672692172665, 0.329280948107925, 0.329105829620499, 1.00053210387561, 0.317053069252578, 0.757340535733592  
"6433", "PEX13", 77.4142154715539, -0.217601379786441, 0.217836159163935, -0.998922220358663, 0.317832371179593, 0.757340535733592  
"6434", "ALMS1-IT1", 5.05129504686421, 0.758576227688468, 0.757794804015181, 1.0010311810917, 0.316811733886938, 0.757340535733592  
"6435", "CHST10", 20.9162886877138, 0.366141789358391, 0.366671575279942, 0.99855514864727, 0.318010236457002, 0.757340535733592  
"6436", "FZD5", 11.2590543968702, -0.606566847620176, 0.605710860582492, -1.00141319413831, 0.316627087887699, 0.757340535733592  
"6437", "HTR2B", 11.7161909174675, 0.71889694722146, 0.720075921578227, 0.998362708262507, 0.31810350985535, 0.757340535733592  
"6438", "DUSP28", 24.522019607511, -0.317176028377108, 0.317590093085977, -0.998696229139754, 0.317941867928422, 0.757340535733592  
"6439", "VHL", 84.8763912836215, 0.279322275649654, 0.278493712580011, 1.00297515897923, 0.315872846933263, 0.757340535733592  
"6440", "GSK3B", 149.50677482363, 0.174159773105379, 0.173911736703961, 1.0014262200247, 0.316620793070859, 0.757340535733592  
"6441", "WDR5B", 20.3667552723427, 0.399532015047696, 0.398676743493948, 1.00214527575964, 0.31627343360198, 0.757340535733592  
"6442", "LINC02035", 16.5105691564128, 0.429040756354052, 0.429627310571842, 0.99863473712365, 0.317971666177044, 0.757340535733592  
"6443", "LAP3", 248.932560498244, -0.165817645952258, 0.166050240591871, -0.998599251414612, 0.317988862932845, 0.757340535733592  
"6444", "SIRT5", 34.4462722391903, 0.289966496647779, 0.289805736321591, 1.00055471754365, 0.317042131508217, 0.757340535733592  
"6445", "TNF", 9.14034186820554, -0.657267325557953, 0.656122837056232, -1.00174432047946, 0.316467095115299, 0.757340535733592  
"6446", "ZNF117", 58.0931660014851, 0.372170265420628, 0.371522670824319, 1.00174308231278, 0.316467693270655, 0.757340535733592  
"6447", "POLR2J2", 9.62557364010356, -0.618485462834276, 0.619318704679875, -0.998654583109952, 0.317962048864599, 0.757340535733592  
"6448", "WDR60", 199.579603834988, -0.238501112735116, 0.238878759908296, -

0.998419084336651,0.318076183235651,0.757340535733592  
"6449","H00K3",512.269526547425,0.214789775446214,0.215191896583717,0.  
998131336988581,0.318215676285856,0.757340535733592  
"6450","VCP1P1",119.293416556255,0.257991758854552,0.258074620011033,0.  
.999678925589516,0.317465914022839,0.757340535733592  
"6451","GDAP1",10.4075778764956,0.486664374498633,0.485908784693876,1.  
0015550033845,0.316558562365332,0.757340535733592  
"6452","MINCR",35.961789139646,0.346489796077,0.345937152517674,1.0015  
9752589539,0.316538016396779,0.757340535733592  
"6453","RPL35",8098.06497416317,-0.221269209284907,0.220830703044082,-  
1.00198571228901,0.316350493483232,0.757340535733592  
"6454","AKR1C3",730.125907064593,-0.327856230713634,0.328345293618641,  
-0.998510522567214,0.318031864552311,0.757340535733592  
"6455","SLC25A28",131.013480175734,-0.196725955750275,0.19666967375990  
8,-1.00028617523633,0.317172035620866,0.757340535733592  
"6456","ACADSB",68.8267753658035,0.21632009582933,0.216379781189214,0.  
999724163877252,0.317444014806333,0.757340535733592  
"6457","MADD",58.1648481470464,-0.246225149076694,0.246638758664858,-0.  
.998323014637265,0.31812275107846,0.757340535733592  
"6458","MTCH2",113.931086150093,-0.313499790497712,0.312982389146262,-  
1.00165313247452,0.316511149806406,0.757340535733592  
"6459","TMEM258",1328.40037709173,-0.241263014267721,0.240910206840641  
, -1.00146447687587,0.31660230575414,0.757340535733592  
"6460","STX5",216.958141625005,-0.241972211365185,0.241281143193225,-1.  
.00286416154538,0.315926406359458,0.757340535733592  
"6461","AP002433.1",7.92180929770673,-0.558557610567938,0.557818957170  
982,-1.00132418123741,0.316670105960976,0.757340535733592  
"6462","SIAE",37.0764442540271,0.332533390699438,0.332131735222729,1.0  
0120932580092,0.31672561885703,0.757340535733592  
"6463","RNF41",122.366838686539,-0.175951622260259,0.175391125265999,-  
1.00319569757826,0.315766448463914,0.757340535733592  
"6464","ING1",132.547907286059,-0.305711279948519,0.30469100491454,-1.  
00334855646383,0.315692715767246,0.757340535733592  
"6465","GPR176",30.9542430397963,-0.432437280799973,0.431924619799246,  
-1.00118692238698,0.316736447807651,0.757340535733592  
"6466","CAPN3",20.5648678196947,0.461992672129845,0.461415690200893,1.  
00125046014084,0.316705736727955,0.757340535733592  
"6467","AC104041.1",11.3125878708852,0.578671171870239,0.5784925830179  
91,1.00030871416072,0.317161131345519,0.757340535733592  
"6468","ASGR1",3.88918783153465,-0.755612583776467,0.755232459234691,-  
1.00050332124517,0.317066991149185,0.757340535733592  
"6469","PSME3",89.6801841520014,-0.204249634561958,0.204064254344141,-  
1.00090844042438,0.316871075577278,0.757340535733592  
"6470","NMT1",384.091495915842,0.196024026275386,0.195539200697132,1.0  
0247942906857,0.316112096896764,0.757340535733592  
"6471","TEX2",37.6040349167162,0.263799537003506,0.263853519243546,0.9  
9979540830005,0.317409528395002,0.757340535733592  
"6472","SAMD1",154.622823074619,-0.219864575523271,0.219450401564384,-  
1.00188732376853,0.316398015560599,0.757340535733592  
"6473","ANKRD27",62.8632769809151,0.212052419285318,0.212185434723367,

0.999373117018034,0.317613977611783,0.757340535733592  
"6474","C19orf48",76.779267635837,-0.332260412580007,0.33223609807615,  
-1.00007318441312,0.317275092187965,0.757340535733592  
"6475","AC011468.5",4.69242038887,0.785505781645105,0.784464687658866,  
1.00132713938896,0.316668676286605,0.757340535733592  
"6476","HSPBP1",62.8506469831908,-0.298607449322301,0.299023278939218,  
-0.998609373763832,0.317983957471552,0.757340535733592  
"6477","HAR1B",2.36733857209009,-1.04745571156999,1.04903639168681,-0.  
998493207548044,0.318040256561323,0.757340535733592  
"6478","AL021155.5",44.0115788197518,0.45036730153597,0.45136142644018  
6,0.997797496981398,0.318377564169013,0.75734457192394  
"6479","DNTTIP2",184.720486243257,-0.189673116057575,0.190122700829233  
, -0.997635291473893,0.318456241395458,0.75734457192394  
"6480","ISG20L2",111.856741566326,-0.199593368640234,0.20002903066958,  
-0.997822005996389,0.318365677262444,0.75734457192394  
"6481","AC005082.1",4.38302973751295,0.691609865443056,0.6933292985360  
23,0.997520033991643,0.318512154380986,0.75734457192394  
"6482","NINJ2",175.270604962607,0.317770889310505,0.318536474716496,0.  
997596553403585,0.318475033047452,0.75734457192394  
"6483","DCTPP1",160.857177148568,-0.25236444100822,0.252895003287582,-  
0.997902045226418,0.318326860148667,0.75734457192394  
"6484","PTPN4",67.1864342365062,0.22794960880527,0.228690569655051,0.9  
96759985114828,0.31888102549212,0.757520574504705  
"6485","SH3TC1",2.69367521267507,-0.877192214823762,0.879797497510696,  
-0.997038770064355,0.31874569157871,0.757520574504705  
"6486","KAT6B",358.521749735586,0.20116220422277,0.201717958842979,0.9  
97244892703671,0.318645655184736,0.757520574504705  
"6487","DAPK2",16.1653258632573,0.466136272918611,0.467646027338623,0.  
996771587201107,0.318875392602499,0.757520574504705  
"6488","AC020978.5",2.84770053252054,-1.13927448377545,1.1428539438061  
2,-0.996867963706063,0.318828603690003,0.757520574504705  
"6489","IL1RAPL1",3.20753282465748,1.35296956711868,1.35698744560312,0.  
.997039118897184,0.318745522264178,0.757520574504705  
"6490","DEDD",85.4798364875678,-0.190985281438767,0.191877467360346,-0.  
.995350230885093,0.319565955339644,0.75754632558929  
"6491","ALS2",50.4002364205425,0.31896041198172,0.320489030237705,0.99  
5230357011435,0.319624240492907,0.75754632558929  
"6492","CTDSPL",291.440468805887,-0.188066907588216,0.188806299636637,  
-0.996083859225862,0.319209401595694,0.75754632558929  
"6493","AC008522.1",4.88048450729145,0.948250107998961,0.9525344140938  
38,0.995502203351936,0.319492073183764,0.75754632558929  
"6494","HILPDA",278.498656762879,0.399572227849915,0.401563902767394,0.  
.995040204301846,0.319716710932175,0.75754632558929  
"6495","CLEC2L",3.4347583833581,-0.957174502100452,0.96097164546365,-0.  
.996048641621089,0.319226511897945,0.75754632558929  
"6496","PTK2",209.805191810339,0.19137785565478,0.192374795664206,0.99  
4817720242492,0.319824926180428,0.75754632558929  
"6497","AP001462.1",4.99517972571818,0.692425451271138,0.6956608588133  
18,0.995349159721738,0.319566476130599,0.75754632558929  
"6498","ACVRL1",507.578689232512,0.238192711573147,0.239142581219486,0



.996028019596111,0.319236531287265,0.75754632558929  
"6499","LINC00327",2.51708243125973,1.0225728692995,1.0272495058934,0.  
99544741898919,0.319518705580561,0.75754632558929  
"6500","AC009118.3",7.12185619209879,0.718820700147291,0.7216454099625  
75,0.996085737155273,0.319208489229666,0.75754632558929  
"6501","CCL5",42.3177832263984,0.561078723328152,0.563600873554752,0.9  
9552493556177,0.319481022770044,0.75754632558929  
"6502","ATP5F1A",685.905397683475,-0.170283962385624,0.171171253682585  
,-0.994816353342799,0.319825591108343,0.75754632558929  
"6503","PDCD2L",28.5755310451553,-0.289156722351269,0.290654093719741,  
-0.99484827015746,0.31981006542008,0.75754632558929  
"6504","NUMBL",264.483430038733,-0.24405156308708,0.244933925534934,-0  
.996397549069907,0.319057023391343,0.75754632558929  
"6505","CCN5",12241.8208232845,-0.254504847149599,0.255515361462135,-0  
.996045191542483,0.319228188134162,0.75754632558929  
"6506","TNNC2",66.5562023641623,0.367333703538854,0.36886593498271,0.9  
9584610206977,0.319324926407325,0.75754632558929  
"6507","PCIF1",82.5859959348301,-0.264482067593002,0.265681373106558,-  
0.995485925492132,0.319499986210232,0.75754632558929  
"6508","RAB22A",341.943547293601,-0.156802182607797,0.157567301721246,  
-0.995144175821435,0.319666147864319,0.75754632558929  
"6509","EDC3",45.7199227990117,0.246817994312223,0.248130883880134,0.9  
94708882879149,0.319877872910908,0.757553758015309  
"6510","TSC22D2",454.20065882938,-0.418363324567444,0.420690456936607,  
-0.994468302451857,0.3199949297784,0.757714568745627  
"6511","TUT7",127.736227933719,0.222671511379114,0.223997815304811,0.9  
94078942583026,0.320184436151996,0.757930448907096  
"6512","DNMBP",150.547019829402,0.218732065136579,0.220017063167657,0.  
994159552842956,0.320145196096701,0.757930448907096  
"6513","PRPF4",86.4857788781607,-0.223831329935711,0.225225164039227,-  
0.993811374899151,0.320314707258837,0.758006019710619  
"6514","TMEM208",354.74493960836,-0.273721527457331,0.275404379013867,  
-0.993889525059253,0.320276654583444,0.758006019710619  
"6515","RGS1",82.4346631098372,-0.501476645914557,0.504809112114645,-0  
.993398561713499,0.320515762235498,0.758016335510923  
"6516","RCHY1",96.8903812518704,0.252022204395244,0.253679678459723,0.  
993466271817505,0.320482779307983,0.758016335510923  
"6517","LRCH4",37.4584796843855,-0.296563628539436,0.298497842079573,-  
0.993520175802071,0.320456523199796,0.758016335510923  
"6518","C11orf54",148.272738803085,0.242575074164691,0.244174811655441  
,0.993448392649905,0.320491488387688,0.758016335510923  
"6519","SELENOI",24.6419877453682,-0.331762825892823,0.334234887877512  
, -0.992603818229787,0.320903063311966,0.758036402570571  
"6520","LARP7",440.489918942996,-0.195414912469026,0.196887094817142,-  
0.992522707750434,0.320942607941663,0.758036402570571  
"6521","MPC1",413.627485894511,-0.236690129073641,0.238485197591848,-0  
.992473040103397,0.320966824494202,0.758036402570571  
"6522","NCALD",294.820439097828,-0.25587338399491,0.257657582762111,-0  
.993075310464087,0.320673254875101,0.758036402570571  
"6523","ZFP41",13.9641796267368,0.401222419882925,0.404147470916913,0.

992762416581867,0.320825749418,0.758036402570571  
"6524","DEPP1",2114.77268772483,0.390499366163993,0.393346233577511,0.  
992762438863018,0.320825738557188,0.758036402570571  
"6525","DAAM1",357.48646700874,-0.222949428893,0.224485906450133,-0.99  
315557229659,0.320634145441593,0.758036402570571  
"6526","NFE2L1",567.001654975124,0.252005739094084,0.253882340582596,0.  
.992608381172926,0.32090083878776,0.758036402570571  
"6527","PDXP",13.7526501438384,-0.420797905176822,0.423832704690674,-0.  
.992839628749113,0.320788114256358,0.758036402570571  
"6528","TNNI3K",8.12676369954093,0.581614883854613,0.586299647359085,0.  
.992009608865409,0.32119283811,0.758266148354295  
"6529","LINC02739",4.51334267005925,0.736975736968622,0.74308687608665  
8,0.991776009892383,0.32130680281889,0.758266148354295  
"6530","PRDM4",72.1503481185526,0.28870712934349,0.291056368249841,0.9  
91928577545041,0.321232367445121,0.758266148354295  
"6531","PHETA1",36.2596588701664,0.262934781642928,0.265197727945751,0.  
.991466946868842,0.321457624359087,0.758266148354295  
"6532","IGHG2",43.2872255528878,1.00813267846856,1.01630322479532,0.99  
1960523072816,0.321216783147459,0.758266148354295  
"6533","UBE2S",329.423700663909,0.307354844036332,0.309965440504696,0.  
991577782142056,0.32140353186571,0.758266148354295  
"6534","POFUT1",93.497107217441,0.191410153119853,0.193004503143889,0.  
991739311787727,0.321324708931263,0.758266148354295  
"6535","XPNPEP2",105.41968088471,0.335572979734724,0.338458766366097,0.  
.991473742393036,0.321454307673013,0.758266148354295  
"6536","HTATSF1",278.664815504723,-0.200326815986546,0.202071917961559  
, -0.991363955998354,0.321507893766871,0.758268693760146  
"6537","SLFN12",46.4314053434407,0.300986356846164,0.303661550203413,0.  
.991190213724927,0.32159270826798,0.758352699701837  
"6538","MKNK1",120.926574148015,0.218499003364604,0.220607847962106,0.  
990440754411128,0.321958733772994,0.758596161731341  
"6539","DENND1B",74.0731241370865,0.247657093263648,0.249945371324927,  
0.990844887228161,0.321761327159989,0.758596161731341  
"6540","ACP1",328.539277535355,-0.22577289062789,0.227913452239973,-0.  
990608006719015,0.321877026512061,0.758596161731341  
"6541","ROCK2",541.893804300301,0.188931221612279,0.190846536317764,0.  
989964110732949,0.322191661314435,0.758596161731341  
"6542","SOS1-  
IT1",2.97250542244621,1.00876377996028,1.01866344698785,0.990281709767  
005,0.322036443925038,0.758596161731341  
"6543","CHPF",154.456419432923,-0.296502928971223,0.299537002981818,-0.  
.989870787313782,0.322237279728629,0.758596161731341  
"6544","GPX8",601.658468056977,0.176427630608825,0.178168177431711,0.9  
90230877096145,0.322061283649365,0.758596161731341  
"6545","AOAH",5.4093101328422,-0.921674072440853,0.931053239971057,-0.  
98992628227093,0.322210152139822,0.758596161731341  
"6546","WNT11",1025.26012733636,-0.394180312013964,0.398036865007303,-  
0.99031106580224,0.322022099471787,0.758596161731341  
"6547","EIF1",14997.6774741508,-0.203843733584026,0.205881180137262,-0.  
.990103774653525,0.322123398579248,0.758596161731341

"6548", "AC011815.2", 2.66001804236913, 0.956957545374215, 0.9666227428845  
37, 0.990001065481369, 0.322173598235205, 0.758596161731341  
"6549", "AKR1C4", 4.86341236189521, 0.930389265917074, 0.940465670785707, 0  
.989285728143363, 0.322523364757709, 0.758914941650197  
"6550", "RAD9A", 57.5844319800271, -0.263171011870454, 0.266046666447651, -  
0.98919116478476, 0.322569620349795, 0.758914941650197  
"6551", "NARS2", 45.377976375746, 0.287308305998302, 0.290365836578228, 0.9  
89470074661824, 0.32243320424373, 0.758914941650197  
"6552", "DI03", 13.9611393675366, 0.575046208290714, 0.581233353187265, 0.9  
89355144775118, 0.322489412421196, 0.758914941650197  
"6553", "CD5", 2.93986296082636, -0.862324255373364, 0.872141908249319, -0.  
988743055707915, 0.322788871384926, 0.759314886677648  
"6554", "SERP1", 798.469059626981, -0.16830299032489, 0.17026149052276, -0.  
98849710411992, 0.322909252002449, 0.759482166557485  
"6555", "NDUFA13", 1852.98659664167, -0.243372877073689, 0.246265908103967  
, -0.988252409549695, 0.323029046421376, 0.759648016870406  
"6556", "NAXE", 253.228293495453, -0.278993202051259, 0.283082692998578, -0  
.985553723175371, 0.324352156300714, 0.759839613701686  
"6557", "RNF144A", 62.9057575903988, 0.372602531107881, 0.377591809965216,  
0.986786580837667, 0.323747274591101, 0.759839613701686  
"6558", "ATAD2B", 102.884257869656, 0.297470203677985, 0.301985417720499, 0  
.985048238167932, 0.324600376937457, 0.759839613701686  
"6559", "KHK", 17.5470081735046, -0.451151278329118, 0.457496144755853, -0.  
986131322636345, 0.324068674886883, 0.759839613701686  
"6560", "RBKS", 18.5475120571272, 0.445880145429673, 0.45292765389113, 0.98  
4440101192959, 0.324899169108446, 0.759839613701686  
"6561", "MAP3K20", 740.721150712454, -0.180028964308861, 0.18283833679475,  
-0.984634663959764, 0.324803556324159, 0.759839613701686  
"6562", "DTYMK", 176.701537974678, -0.285643797080234, 0.289258567515696, -  
0.987503324563533, 0.323395953913027, 0.759839613701686  
"6563", "XRN1", 238.485293210156, 0.211906200990047, 0.214539331233752, 0.9  
87726585010947, 0.323286570855209, 0.759839613701686  
"6564", "COMMD2", 249.861930356973, -0.181913220691968, 0.184653144965131,  
-0.985161778459392, 0.324544611712113, 0.759839613701686  
"6565", "AC104825.1", 20.8086491879968, 0.421344139028379, 0.4274218150045  
73, 0.985780613523132, 0.324240780996728, 0.759839613701686  
"6566", "COX18", 36.0993835454595, 0.28151988277505, 0.28538203180712, 0.98  
6466740713795, 0.323904128337786, 0.759839613701686  
"6567", "LAMTOR3", 194.975397578953, 0.174468574680532, 0.176713513896267,  
0.987296165605915, 0.323497469863005, 0.759839613701686  
"6568", "LINC02569", 2.68179254530538, -0.844855764442174, 0.8567261291905  
73, -0.986144504826048, 0.324062207052676, 0.759839613701686  
"6569", "YIPF3", 600.018233039815, -0.22833624776653, 0.23115649980363, -0.  
987799382498457, 0.323250910048526, 0.759839613701686  
"6570", "AFG1L", 11.2713954738828, 0.472879471745541, 0.48015158625678, 0.9  
84854544440992, 0.324695523856207, 0.759839613701686  
"6571", "TCF21", 10.9621298444123, -0.713384585852168, 0.724529223604971, -  
0.984618097669889, 0.324811696680802, 0.759839613701686  
"6572", "AL080276.2", 15.5876568936086, -0.463180897955048, 0.470021173543  
323, -0.985446877772106, 0.324404612902055, 0.759839613701686

"6573", "NT5C3A", 168.541644032651, -0.190622483302055, 0.193159473079115, -0.986865827822893, 0.32370841849263, 0.759839613701686  
"6574", "TNS3", 49.1867943767366, -0.485573244720391, 0.493334244152826, -0.984268273438502, 0.324983624595214, 0.759839613701686  
"6575", "ATXN7L1", 42.8102052633227, 0.275735860867902, 0.280017320969209, 0.984710016914356, 0.324766531005222, 0.759839613701686  
"6576", "LSM8", 459.205099580629, -0.21429703738894, 0.217079064406417, -0.987184268436551, 0.323552312467335, 0.759839613701686  
"6577", "PTRZ1", 9.03709070219336, 0.725806367660244, 0.735014955681605, 0.987471563741419, 0.323411516603951, 0.759839613701686  
"6578", "PCM1", 559.927807658367, 0.21124456506658, 0.214611568033597, 0.98431117670931, 0.32496253576384, 0.759839613701686  
"6579", "TSPYL5", 87.6399900985035, 0.228061430012907, 0.231378746693802, 0.985662828897225, 0.324298595677966, 0.759839613701686  
"6580", "LINC01230", 7.53926978618674, 0.599725745318763, 0.607448206850641, 0.987287045307261, 0.323501939641443, 0.759839613701686  
"6581", "MARK2", 88.5031277130871, 0.265454223183869, 0.269157640586255, 0.986240712341214, 0.324015005433736, 0.759839613701686  
"6582", "GSTP1", 3203.20014436961, -0.267693210239521, 0.27129851119101, -0.986710944576652, 0.323784363126325, 0.759839613701686  
"6583", "UPF3A", 410.614863671596, -0.234369921345483, 0.237571450013159, -0.986523933462973, 0.323876076637399, 0.759839613701686  
"6584", "ZSCAN29", 40.3631327301416, 0.308334067696972, 0.31317700246626, 0.984536109831981, 0.32485198588426, 0.759839613701686  
"6585", "TP53BP1", 174.127222773841, 0.181481452593035, 0.184038039030763, 0.986108380358802, 0.324079931703379, 0.759839613701686  
"6586", "RAB40C", 32.5161867976282, 0.300231233318567, 0.304005225420223, 0.987585765683997, 0.323355560332267, 0.759839613701686  
"6587", "TRIM16", 36.5899309846485, -0.317372329876104, 0.321501766672564, -0.987155788165028, 0.323566272074198, 0.759839613701686  
"6588", "MAP2K2", 905.707407273534, -0.237205866165704, 0.240604842481658, -0.985873200718255, 0.324195339207356, 0.759839613701686  
"6589", "DOP1B", 32.6566622793271, 0.318174039645899, 0.322817404687095, 0.985616125482153, 0.324321521946432, 0.759839613701686  
"6590", "TRO", 15.8629657707945, 0.414491344425809, 0.421066462534336, 0.984384607434767, 0.324926443421762, 0.759839613701686  
"6591", "TMSB15A", 5.60522802633087, -0.85028310630026, 0.862831438748877, -0.985456797370745, 0.324399742563535, 0.759839613701686  
"6592", "APLN", 8.58458105899463, 0.667953473021904, 0.677109831483482, 0.986477292108554, 0.323898953007381, 0.759839613701686  
"6593", "AC145212.1", 3.75905708857203, 0.911579088173093, 0.92604856994354, 0.984375029301834, 0.324931151074915, 0.759839613701686  
"6594", "PKP4", 28.1966365188341, -0.400478031438088, 0.406972899651456, -0.984041030203901, 0.325095339420322, 0.759870304346364  
"6595", "TMEM128", 140.268582489089, 0.228249040054129, 0.231950559481702, 0.984041774092528, 0.3250949736772, 0.759870304346364  
"6596", "AL450998.2", 24.4694267857142, -0.342787442698637, 0.348402388699669, -0.983883732766621, 0.325172682892584, 0.759935856092964  
"6597", "PROSER3", 25.0310447911567, -0.333906393698074, 0.339410534535605, -0.983783235116546, 0.325222104060373, 0.759936142805921

"6598", "PPP1R7", 330.804204250138, -0.236689494685823, 0.240659242984636, -0.983504692154849, 0.325359107116374, 0.760019394201448  
"6599", "SMARCC1", 145.944251106748, 0.210359133154166, 0.213907844018405, 0.983410094751207, 0.325405643965589, 0.760019394201448  
"6600", "ZNF665", 25.9004207232669, 0.359709376013664, 0.365774650167785, 0.983418002993539, 0.325401753368651, 0.760019394201448  
"6601", "NDUFAF2", 308.163522474313, -0.272051477411233, 0.276711378884461, -0.983159704194263, 0.325528843586877, 0.76011582078687  
"6602", "AC234772.2", 11.8773474850595, -0.734100144497692, 0.746700145351351, -0.983125755456055, 0.325545549713585, 0.76011582078687  
"6603", "MCUB", 454.767429406883, -0.200640533663906, 0.20412879996642, -0.982911444621789, 0.325651024646398, 0.760246940015785  
"6604", "GBP3", 147.262229743708, -0.206921728726077, 0.210697013560081, -0.982081925271676, 0.326059489231349, 0.760770044187056  
"6605", "KRTCAP2", 1565.25175430652, -0.25242111570186, 0.257155002456831, -0.981591309872475, 0.326301230398134, 0.760770044187056  
"6606", "DPY30", 313.946017894717, -0.23778306636717, 0.242096900037179, -0.982181375848486, 0.326010501094528, 0.760770044187056  
"6607", "FAT1", 196.90188035514, -0.361140602391422, 0.367766516319455, -0.98198336815884, 0.326108041979303, 0.760770044187056  
"6608", "IRF1", 2303.18193045467, -0.443411657965824, 0.451732884590287, -0.981579320637658, 0.326307139317287, 0.760770044187056  
"6609", "DCUN1D2", 22.2316378201076, 0.394831084349794, 0.40225071552843, 0.981554709806077, 0.32631926903437, 0.760770044187056  
"6610", "LINC02076", 2.42561490846051, -0.923200868888557, 0.94014541950992, -0.981976670555715, 0.326111341627936, 0.760770044187056  
"6611", "MYDGF", 952.285406023728, -0.24719508575243, 0.251774282120777, -0.981812295005769, 0.32619232987193, 0.760770044187056  
"6612", "LARGE1", 62.9967777623141, 0.23840226362177, 0.242808207208039, 0.981854222981455, 0.32617167061173, 0.760770044187056  
"6613", "HFM1", 3.99241060796269, 0.786158235464989, 0.801355781813408, 0.981035207215917, 0.326575379932254, 0.760848552590179  
"6614", "ZBTB20-AS2", 17.6923958067946, 0.349250114098487, 0.355969077471565, 0.981124867865484, 0.326531168579276, 0.760848552590179  
"6615", "PRR7", 4.65785753726303, 0.710702852132605, 0.72419861897269, 0.981364550433375, 0.326413001036465, 0.760848552590179  
"6616", "ABCC4", 7.01955412523445, -0.554238277908244, 0.56498092459507, -0.980985824088618, 0.326599732240624, 0.760848552590179  
"6617", "PDCD5", 699.645360180582, -0.242975253846738, 0.247671043154657, -0.98104021669991, 0.32657290967063, 0.760848552590179  
"6618", "SNX16", 60.1194719501724, 0.223927720708243, 0.228293649495812, 0.980875820255135, 0.326653982687157, 0.760859949096786  
"6619", "SPRR2F", 3.73022339481175, 1.16720489928861, 1.19132673271316, 0.979752126127809, 0.327208488764624, 0.760963973821545  
"6620", "ACYP2", 85.0893339743949, 0.254603857372518, 0.259785110378206, 0.980055619823074, 0.327058664403239, 0.760963973821545  
"6621", "METTL8", 101.243455483714, -0.217306310101315, 0.221653556046546, -0.9803872041452, 0.326895023603279, 0.760963973821545  
"6622", "MCM9", 21.6598034761641, 0.340909493460233, 0.347791009740363, 0.9

80213645300184,0.326980670320156,0.760963973821545  
"6623","DLL1",16.4451912507643,0.411064907408943,0.419451627725566,0.9  
80005512525726,0.327083397575402,0.760963973821545  
"6624","ACSS3",67.5718002448866,0.234911881636676,0.239779193542126,0.  
979700857970419,0.327233802483417,0.760963973821545  
"6625","AL606834.2",2.70698740513306,0.915405727492483,0.9342177588046  
42,0.979863333644792,0.327153584280024,0.760963973821545  
"6626","MTSS2",13.109454528583,0.434125092343888,0.443114398347994,0.9  
79713351591328,0.327227633624819,0.760963973821545  
"6627","CRLF1",76.246546005011,-0.721569006388218,0.73653168782351,-0.  
979684945423723,0.327241659582421,0.760963973821545  
"6628","RBM10",104.473132025858,0.203424588143072,0.207592326412947,0.  
979923447355256,0.327123907911337,0.760963973821545  
"6629","TIMM8A",30.6627161680733,-0.372685631089569,0.380213495888655,  
-0.980200953200013,0.326986934108938,0.760963973821545  
"6630","POLE4",356.590846503325,-0.229489214841798,0.234315132658712,-  
0.979404156436009,0.327380324219832,0.761065893288014  
"6631","NPAT",75.2370541563186,0.307011859793809,0.31347053003994,0.97  
9396244216932,0.327384232137063,0.761065893288014  
"6632","AC012510.1",9.59456609589741,-0.479503002384303,0.489644588595  
379,-0.979287862161067,0.327437766072377,0.761075567552125  
"6633","CORT",3.67810834594655,-0.742641743592597,0.758946790690361,-0  
.978516218399274,0.327819073916674,0.761394047577226  
"6634","RPL37",16592.7218316418,-0.253741349903887,0.259296919778586,-  
0.978574485653577,0.327790271093645,0.761394047577226  
"6635","ARPC5L",151.899536706828,-0.246813338828496,0.252228263122457,  
-0.978531651342612,0.327811444903482,0.761394047577226  
"6636","RCCD1",35.620236041386,0.305607841348236,0.312230569526408,0.9  
78788982167194,0.327684254760997,0.761394047577226  
"6637","AL021707.6",5.71918960186772,-0.662211820266027,0.676754736365  
638,-0.978510802631822,0.327821751136558,0.761394047577226  
"6638","BAG2",166.778544937933,-0.252580120198665,0.258205097432377,-0  
.978215080609764,0.327967959320409,0.761618875101553  
"6639","UGDH",732.331204671953,-0.244008974317022,0.249576099301339,-0  
.977693677399794,0.328225849780398,0.762047363635276  
"6640","AL606834.1",29.7713293557713,0.329277997999833,0.3368083096584  
6,0.977642144084084,0.328251345737154,0.762047363635276  
"6641","CTC1",18.9874215648958,0.381870729286423,0.390728398800264,0.9  
7733036671755,0.328405624069147,0.762290723539513  
"6642","ATAD3A",46.0951185769665,-0.250896834285561,0.256845209024924,  
-0.976840624117752,0.328648060748637,0.76262379293094  
"6643","RETN",3.10388437005106,-3.04978545279435,3.12184836495084,-0.9  
76916587952977,0.328610448862668,0.76262379293094  
"6644","ARHGAP31",19.277067764008,-0.382678753229927,0.39180929841742,  
-0.976696456096439,0.328719450169479,0.762674642438669  
"6645","DDX18",448.117043054902,-0.198476317810649,0.203385194484078,-  
0.97586413954132,0.329131794964059,0.762838389091642  
"6646","GLS",392.055806764732,0.269933692755825,0.276527400851591,0.97  
6155317427999,0.328987502025755,0.762838389091642  
"6647","TMEM120A",144.518156344814,-0.191165927601309,0.19587365133359

7,-0.975965507865729,0.329081557329633,0.762838389091642  
"6648","SRI",1278.2136768771,-0.243667994199849,0.249658308230292,-0.9  
7600594960005,0.32906151599534,0.762838389091642  
"6649","ASAH1",671.936631301133,0.222177456476521,0.22756759746812,0.9  
76314110393707,0.328908829594663,0.762838389091642  
"6650","COG7",65.2655378148558,0.251334124183361,0.257510431376766,0.9  
76015312620991,0.32905687616287,0.762838389091642  
"6651","TXLNG",177.274455329285,0.216042686991454,0.221388152627301,0.  
97585478006655,0.329136433723549,0.762838389091642  
"6652","PIF0",34.4866442840151,0.35877921599487,0.368046943333892,0.97  
4819170470289,0.329649966086551,0.762868038423861  
"6653","BRINP3",2.54113371473128,1.28395476619479,1.31723980761217,0.9  
7473122112995,0.3296936018151,0.762868038423861  
"6654","CLSTN3",57.0165041729373,-0.397082006693025,0.40733065515051,-  
0.974839486476417,0.329639886909756,0.762868038423861  
"6655","RB1",93.5577781006578,0.234110611462173,0.240022477872927,0.97  
5369530124242,0.329376992201477,0.762868038423861  
"6656","NIPA2",130.850638909484,-0.181570351287918,0.186090931209843,-  
0.975707682837983,0.329209343878456,0.762868038423861  
"6657","SH2B1",83.9360417544302,0.199703661505554,0.204753211428896,0.  
975338360321176,0.329392448255362,0.762868038423861  
"6658","RABEP2",71.2092377907834,-0.213703218524676,0.219111084816483,  
-0.97531906568608,0.329402016049498,0.762868038423861  
"6659","AC018557.1",5.22489239286321,0.933183956815751,0.9572706706308  
21,0.974838136637784,0.329640556585497,0.762868038423861  
"6660","ERCC1",313.169324501491,-0.256760903968017,0.263301355451235,-  
0.975159826002379,0.329480986455188,0.762868038423861  
"6661","GYG2",2.86146775249136,0.975701811782343,1.00044027866576,0.97  
5272420142452,0.329425147314118,0.762868038423861  
"6662","SLC25A14",22.8714138306953,-0.345284999992301,0.35423423046556  
3,-0.974736404041192,0.329691030229795,0.762868038423861  
"6663","CCDC93",133.49998089152,0.19939883202177,0.204595824577704,0.9  
74598735987595,0.32975934087337,0.762905634033168  
"6664","YEATS2",61.7326323733948,0.260082500353253,0.26701116110904,0.  
974051044431966,0.330031195217862,0.763419999142158  
"6665","DCBLD1",9.48903080557409,0.478542029236264,0.491426060838833,0.  
973782359892397,0.330164613577422,0.763614031252208  
"6666","PCDHGA7",4.77597649378398,0.679612634063524,0.698027435407004,  
0.973618800050828,0.330245848169271,0.763687331162513  
"6667","RAD54L2",65.1038190340768,0.285526769575712,0.293476051017852,  
0.972913355571708,0.330596366599629,0.764039428955515  
"6668","VPS50",67.0927991369869,0.210256271128814,0.216101422249489,0.  
972951815588116,0.330577250537973,0.764039428955515  
"6669","VPS28",1094.44650139327,-0.237408720956077,0.24397534833755,-0.  
973084873425868,0.330511121351349,0.764039428955515  
"6670","S1PR3",164.854132345446,-0.443452106029341,0.455740176232886,-  
0.973037114469219,0.33053485636724,0.764039428955515  
"6671","MCTP2",3.46060234531071,-0.811511124672763,0.834243226134008,-  
0.972751230397652,0.330676956716973,0.764111120940209  
"6672","POMC",10.3187211333423,-0.669348570234686,0.688364156900047,-0

.972375687381814,0.330863682628344,0.76412921563535  
"6673","IWS1",193.354957573896,-0.213168640460624,0.219326345671889,-0  
.971924461731207,0.331088129339334,0.76412921563535  
"6674","PMPCB",216.385911712954,-0.199093657727343,0.204780213091458,-  
0.97223093345657,0.330935674773433,0.76412921563535  
"6675","ELP1",58.7661108446341,0.217020141951216,0.223148652331714,0.9  
72536198106241,0.330783865818959,0.76412921563535  
"6676","SFXN2",2.47309619891431,0.970145506197596,0.998112185134715,0.  
971980425293231,0.331060286838175,0.76412921563535  
"6677","CACUL1",217.283549956545,0.168693133265581,0.173565982278717,0  
.971925091834463,0.331087815847452,0.76412921563535  
"6678","PYCR1",65.1261191405838,0.414339177748242,0.426261780014467,0.  
972029858586382,0.331035694478878,0.76412921563535  
"6679","DDX49",134.612934890795,-0.237266174338089,0.244141578510919,-  
0.97183845449528,0.331130921858199,0.76412921563535  
"6680","RBM41",75.1886644184067,0.309613161190531,0.318557123371836,0.  
971923521638332,0.331088597059041,0.76412921563535  
"6681","NELFA",93.8050119978961,0.216411188910424,0.222725115531403,0.  
97165148346241,0.331223960806584,0.764229509928678  
"6682","ARSK",74.7190605534004,-0.197495149564355,0.203288111843198,-0  
.971503683976802,0.331297519502757,0.764284834351241  
"6683","HBP1",445.498891053913,0.207757429632942,0.213995333774664,0.9  
7085027962203,0.331622840521657,0.764806416313784  
"6684","IREB2",200.179842500767,0.184089745493248,0.189615622672188,0.  
970857479457303,0.331619254698114,0.764806416313784  
"6685","PPIL3",172.008138333908,-0.258165923946127,0.266157699872629,-  
0.969973530991866,0.332059685913953,0.765333464082942  
"6686","RBM27",288.650600611408,0.182407457931962,0.187996417688373,0.  
970270924174335,0.331911466279704,0.765333464082942  
"6687","ZNF800",153.360114639719,-0.171357602152829,0.176678921923614,  
-0.969881411359953,0.332105606663597,0.765333464082942  
"6688","RBIS",837.888899564989,-0.227904313771585,0.234942540350851,-0  
.970042774847181,0.332025171219891,0.765333464082942  
"6689","MAN1B1",243.386079768261,0.167937775306837,0.173168531007125,0  
.969793843778273,0.332149262063891,0.765333464082942  
"6690","TTC7B",47.0947177710393,0.270596130613155,0.278985964610568,0.  
969927397569538,0.332082682467971,0.765333464082942  
"6691","YTHDC2",96.0722576388499,0.267548198925759,0.275927798067493,0  
.969631189026904,0.332230360796199,0.765405920142492  
"6692","USP3",142.256012055633,0.188451832169448,0.194433423595839,0.9  
69235786133025,0.332427559768977,0.765745791069752  
"6693","PTGS2",81.6931492385312,-0.493522834503258,0.509243769198397,-  
0.969128861959595,0.332480898961611,0.765754229417784  
"6694","ZNF649",23.9769402185594,-0.326663421853051,0.337161324580923,  
-0.968863858448412,0.332613119959594,0.765944314935336  
"6695","CMTR1",58.8234791727626,0.292262543461514,0.301815867649365,0.  
968347177163828,0.332871010835978,0.766068872010944  
"6696","PPIA",3153.11306172699,-0.234113426793843,0.241742266064332,-0  
.96844226127814,0.33282354185836,0.766068872010944  
"6697","ABCB4",11.5625358851748,-0.557644594303508,0.575975192880191,-



0.968174673487203,0.33295714124981,0.766068872010944  
"6698","AL132656.3",3.79724491699859,-0.741006225367182,0.765074295643  
753,-0.968541525426207,0.332773990739904,0.766068872010944  
"6699","PCLAF",3.92592275447446,-0.782837474200592,0.808584285645866,-  
0.968158160005906,0.332965387121202,0.766068872010944  
"6700","ZNF227",45.2315252411451,0.250081599496057,0.258269053619655,0  
.968298741142813,0.332895193300004,0.766068872010944  
"6701","MFSD10",445.037161327675,-0.216232051134625,0.223402036336936,  
-0.967905461741195,0.333091586370443,0.766157425051241  
"6702","TMEM246",4.189051899328,0.955006640245714,0.986869434436496,0.  
967713262688113,0.333187592566943,0.766157425051241  
"6703","TTI1",45.9707294913677,0.239846677388792,0.247856647465743,0.9  
67683053253363,0.333202684238957,0.766157425051241  
"6704","LINC01560",19.1816690111858,-0.40666151842331,0.42023164028862  
4,-0.967707995866295,0.333190223671723,0.766157425051241  
"6705","HIST2H2AB",2.67959288770099,0.990217394782862,1.02429607425727  
,0.966729659196322,0.333679196229454,0.766567035749185  
"6706","TLL1",3.79919018553954,-1.15804493534476,1.19749299105726,-0.9  
67057798244261,0.333515140800698,0.766567035749185  
"6707","AL135905.2",2.52598987304816,-0.841264728680593,0.870210443076  
73,-0.966737109826221,0.333675470657041,0.766567035749185  
"6708","TTC23",64.2964370541608,0.27285003048604,0.282221535946864,0.9  
66793797541416,0.333647125719332,0.766567035749185  
"6709","PSMG2",740.220290975034,-0.243062089087984,0.251425863163456,-  
0.966734631154334,0.333676710075658,0.766567035749185  
"6710","ADA",278.791869496715,-0.260153421294048,0.269004681752902,-0.  
967096258692685,0.333495915636477,0.766567035749185  
"6711","POLR3F",54.4503941174969,-0.254643408562635,0.263441064531756,  
-0.966604842017483,0.333741613122338,0.766596180342846  
"6712","GABARAPL2",1139.96937789482,-0.223300173962222,0.2310622507818  
13,-0.966406988621776,0.333840568412717,0.766709231537848  
"6713","LINC02802",895.492937913406,0.236503756456598,0.24480381031707  
2,0.966095078954351,0.33399660675101,0.766953328328142  
"6714","TRAT1",3.20093167121855,0.880362758965555,0.9115298110691,0.96  
5807972789184,0.334140278263829,0.767168958808003  
"6715","UBE3A",309.025449253827,0.156290750228141,0.16189035548997,0.9  
65411125048915,0.334338931431432,0.767510741327704  
"6716","PSME4",76.5031340087148,0.266031187642072,0.275629760880827,0.  
965175846004142,0.334456742841346,0.76766686880574  
"6717","WDR74",214.174586721082,-0.274357068780749,0.284353670124466,-  
0.964844479273499,0.334622713671286,0.767819162137968  
"6718","SGPP1",76.6093325264449,0.225578424902409,0.2337976491778,0.96  
4844709498599,0.334622598340589,0.767819162137968  
"6719","ADAMTSL4-  
AS1",32.3444313212191,0.407735574207099,0.422684904650598,0.9646324477  
66602,0.334728941209116,0.767948597817908  
"6720","PAIP2",619.678365124315,0.177847422361561,0.1844075742728,0.96  
4425800094659,0.334832492360508,0.767957576214438  
"6721","ATP5P0",1097.72892723867,-0.263940399378389,0.273648010677879,  
-0.964525189584086,0.334782685709716,0.767957576214438

"6722","C1R",8096.34506063734,0.233975234780455,0.24263313835653,0.964316895726941,0.334887072645441,0.767968495214143  
"6723","CDC123",232.066757507489,-0.243058805127222,0.25208214819107,-0.964204751789848,0.334943282516213,0.767983147402563  
"6724","CAPZB",865.761406003421,-0.23648207940849,0.245416730726803,-0.963593959988577,0.335249536206723,0.768146842308967  
"6725","SMU1",215.935725274221,-0.155730433124954,0.161603976854039,-0.963654707987849,0.335219068818691,0.768146842308967  
"6726","AC007541.1",36.6670238964614,0.31677089104197,0.328748698913781,0.963565459235619,0.335263831012308,0.768146842308967  
"6727","AC011921.1",2.60289748276013,-1.06606511721243,1.10604324299377,-0.963854825718087,0.335118714925916,0.768146842308967  
"6728","PCDH19",2.44611489516342,1.02652345337508,1.06501399186533,0.963859124120198,0.335116559600182,0.768146842308967  
"6729","AP000866.6",8.07422680861477,0.594712271742922,0.617371963181704,0.963296533062496,0.33539873264924,0.768239253412232  
"6730","CLBA1",18.3106778222236,-0.341079763130983,0.354079304934496,-0.963286355281571,0.335403838823505,0.768239253412232  
"6731","AP001062.1",4.45366969028733,-0.734819487269022,0.763012889939281,-0.963049899887665,0.33552248215843,0.7683968299617  
"6732","SLC29A3",34.1347790369601,0.325421519423124,0.337999340510228,0.96278743896921,0.335654205609084,0.768581770002329  
"6733","B4GAT1",178.041217993476,0.23828683067876,0.247521789149373,0.962690321113349,0.335702955395763,0.768581770002329  
"6734","PAQR7",31.0317467619697,-0.323798686297088,0.336446847470926,-0.962406658677545,0.335845370174134,0.768657522832858  
"6735","STUM",3.71384486430542,0.819537646918692,0.851709103433939,0.962227177817475,0.335935499923773,0.768657522832858  
"6736","LINC01011",14.0358749096168,0.451076745617368,0.468701629151523,0.962396368098698,0.33585053736461,0.768657522832858  
"6737","COX6B1",1435.16833406138,-0.248984312062113,0.258737601213348,-0.962304322582041,0.335896758295946,0.768657522832858  
"6738","OSBPL3",11.0565145656656,-0.548697530767725,0.570312014055082,-0.962100599751228,0.335999072883294,0.768688885202728  
"6739","DCAF16",94.6395054368191,0.24041542405003,0.249921969373656,0.961961946172837,0.336068719570995,0.768734131501244  
"6740","AHCYL1",698.07615578956,0.149180543615975,0.155259718563093,0.960845124521798,0.336630045874735,0.768852867540145  
"6741","FCGR3A",12.2462519297821,-0.525040340240233,0.546297689978604,-0.961088340426254,0.336507751669346,0.768852867540145  
"6742","TMCC2",3.69332245438148,0.760508881620669,0.79115856653482,0.961259744619346,0.336421583112022,0.768852867540145  
"6743","PSD4",4.72371760950969,-0.814516350220675,0.847329611645639,-0.961274501712225,0.336414165069238,0.768852867540145  
"6744","CARMN",4.64494422052504,-0.844980075752268,0.879749279556252,-0.960478281014879,0.336814556774451,0.768852867540145  
"6745","HIST1H1D",5.61105511967637,-1.02184947096034,1.06412573531959,-0.960271363659339,0.336918658464722,0.768852867540145  
"6746","AL645933.2",8.70065021316616,-0.533517671664035,0.555193376765543,-0.96095827866718,0.336573145972962,0.768852867540145

"6747", "MAD2L1BP", 58.5803404380182, -0.26775611883442, 0.278746135757998, -0.960573383757618, 0.336766716802675, 0.768852867540145  
"6748", "GLI3", 389.862613187171, 0.186673951622571, 0.194385844348668, 0.960326881044566, 0.336890725216714, 0.768852867540145  
"6749", "MRPS33", 243.901912640843, -0.254713936208946, 0.265203651869925, -0.960446564038554, 0.336830512483242, 0.768852867540145  
"6750", "BNC2", 279.693794576992, 0.320287285701072, 0.3331000180365, 0.961534879490687, 0.336283296605114, 0.768852867540145  
"6751", "TIGAR", 14.4283167339952, -0.442572789987551, 0.460287926442313, -0.961512923895946, 0.336294330440912, 0.768852867540145  
"6752", "AL139317.5", 51.1479645909525, -0.354624662420026, 0.368986739266267, -0.96107698375611, 0.336513461412009, 0.768852867540145  
"6753", "AC005225.2", 3.56312527953984, -0.736825533046619, 0.767241614930753, -0.96035657960644, 0.336875783170227, 0.768852867540145  
"6754", "FAHD1", 115.168043904676, -0.224264169728061, 0.233452465076121, -0.9606416863276, 0.33673236094192, 0.768852867540145  
"6755", "LINC00323", 6.31453019852469, -0.634618283330249, 0.660294585993853, -0.961113867645974, 0.336494917689819, 0.768852867540145  
"6756", "NMNAT1", 39.9436054476906, 0.267663384680062, 0.278874882085289, 0.959797392574788, 0.337157194874403, 0.769072419173232  
"6757", "YWHAG", 399.978893580443, -0.175197095807706, 0.182538274450118, -0.959782798076036, 0.337164541600564, 0.769072419173232  
"6758", "SIDT2", 163.379303992477, 0.179957637956189, 0.187463724767515, 0.959959790510753, 0.337075452305115, 0.769072419173232  
"6759", "RAB32", 714.559969374617, 0.266471704063895, 0.277804258190981, 0.959206693947452, 0.337454628921866, 0.769620225600025  
"6760", "MRPL18", 504.206466265184, -0.23561776521258, 0.245703410126758, -0.958951953865945, 0.337582950033811, 0.769685131603491  
"6761", "AL049840.4", 9.99241439762919, 0.598471635395216, 0.624086050127158, 0.958956918318037, 0.337580448973468, 0.769685131603491  
"6762", "BIRC6", 238.199876915681, 0.217303458371089, 0.226823326474553, 0.958029589586623, 0.338047838076012, 0.769743610111203  
"6763", "PTPN18", 157.450777604879, 0.193257122199384, 0.201717887465807, 0.958056445203174, 0.338034296557417, 0.769743610111203  
"6764", "ROB01", 199.215334396711, 0.186049056591042, 0.194203787240812, 0.958009414926299, 0.338058011057596, 0.769743610111203  
"6765", "CNBP", 1374.08142854383, -0.144709950349855, 0.151023089006271, -0.958197526630158, 0.337963164208808, 0.769743610111203  
"6766", "SAMD8", 156.256814488925, 0.253247235683945, 0.264241363676413, 0.95839361468808, 0.337864313840029, 0.769743610111203  
"6767", "ANGEL1", 13.9954906647771, 0.427555328245536, 0.44621182558341, 0.958189146346624, 0.337967389225286, 0.769743610111203  
"6768", "ZWILCH", 32.0219777079188, 0.312898688490911, 0.326476207648108, 0.958411918421233, 0.337855087653964, 0.769743610111203  
"6769", "ALDH16A1", 142.641491898686, -0.252558659972395, 0.263576584782175, -0.958198393006399, 0.337962727417181, 0.769743610111203  
"6770", "TASP1", 142.64952752188, 0.258704926511252, 0.270023694408532, 0.958082315990555, 0.338021251952785, 0.769743610111203  
"6771", "SCOC", 262.389749273655, -0.209291678354619, 0.218507982329873, -0.957821659982469, 0.338152695071774, 0.769845487303411

"6772", "TMEM255B", 4.00251049092312, -0.703184926902115, 0.73427564174813  
8, -0.957657978723082, 0.338235252723894, 0.769919731355408  
"6773", "RAB2A", 1136.50631748893, -0.148391020270988, 0.155007110568333, -  
0.95731750451262, 0.338407022770126, 0.770196996309094  
"6774", "AC083855.2", 7.23300418633295, -0.625868138123945, 0.653988319191  
508, -0.957002013273989, 0.33856623883157, 0.770233951360804  
"6775", "CTBP1-  
DT", 50.6351148783994, 0.273944877736967, 0.286257289886947, 0.95698830183  
5588, 0.338573159547247, 0.770233951360804  
"6776", "SLC35A2", 61.8794604825738, -0.297182101062471, 0.310535167789842  
, -0.956999824456572, 0.338567343609862, 0.770233951360804  
"6777", "NRDC", 243.745691472058, 0.170558490277274, 0.178285073089102, 0.9  
56661639261487, 0.338738066169753, 0.770417418318334  
"6778", "WWC2", 139.757382092421, 0.253021574731124, 0.264492467519418, 0.9  
56630550216136, 0.338753763305979, 0.770417418318334  
"6779", "PPIL4", 309.603244279777, -0.164206513975149, 0.171705275016951, -  
0.956327718871416, 0.338906689973933, 0.770570744368284  
"6780", "PSMB3", 574.400467086819, -0.272716282181864, 0.285208378782414, -  
0.95620010655409, 0.338971146127884, 0.770570744368284  
"6781", "SAMM50", 174.058847883851, -0.192619580863495, 0.201425499582519,  
-0.956282006313625, 0.338929778186295, 0.770570744368284  
"6782", "AC009812.4", 2.53589978812969, 0.933690870044415, 0.9770369258765  
27, 0.955635191788452, 0.339256575390777, 0.771105884642999  
"6783", "TEX261", 145.424959481443, 0.176600902909156, 0.184955656853253, 0  
.954828340553403, 0.339664512936925, 0.771578023419201  
"6784", "GOLGA8R", 9.06110362163029, 0.626544585418365, 0.656073881448411,  
0.95499089833472, 0.339582299728753, 0.771578023419201  
"6785", "CFD", 145924.408534051, 0.24372095149344, 0.255198381539845, 0.955  
025459106947, 0.339564822346106, 0.771578023419201  
"6786", "TBXA2R", 23.7388976399758, -0.427467883623685, 0.447678868452992,  
-0.954853833286462, 0.339651619204559, 0.771578023419201  
"6787", "MRPS17", 139.703282133784, -0.234455036639012, 0.245698334520307,  
-0.954239421674362, 0.339962464111256, 0.771967874581531  
"6788", "CASD1", 124.00858007275, 0.17085723375522, 0.179036953272542, 0.95  
4312674742233, 0.339925394134562, 0.771967874581531  
"6789", "AC069544.1", 4.42036844487859, -0.66488741063374, 0.6968065993640  
71, -0.954192183656898, 0.339986370453066, 0.771967874581531  
"6790", "PLA2G2A", 18624.8688527499, -0.361964145397498, 0.379611878221396  
, -0.95351111533553, 0.340331167090724, 0.772213501661466  
"6791", "TGFBRAPI", 69.1673461553439, -0.240765763043866, 0.25245104300234  
5, -0.95371268892571, 0.340229095407436, 0.772213501661466  
"6792", "AC080013.1", 8.30608699040529, 0.56249952828014, 0.58999962997515  
8, 0.953389628911842, 0.340392694167986, 0.772213501661466  
"6793", "BMS1", 107.427087538397, -0.195606443233836, 0.205191784415322, -0  
.953285940717367, 0.340445212928402, 0.772213501661466  
"6794", "CCDC86", 31.4132606112968, -0.287645238651536, 0.301706930924939,  
-0.953392876224972, 0.340391049466118, 0.772213501661466  
"6795", "STX1B", 4.30282734818024, -0.707739148754383, 0.742330167181296, -  
0.953402111410535, 0.340386372049449, 0.772213501661466  
"6796", "TERF2IP", 626.54945238971, -0.145427608172246, 0.152552001143477,

-0.953298593805199,0.340438803777121,0.772213501661466  
"6797","ARPC2",1650.75318271116,-0.185062479839367,0.194261499303552,-  
0.952646203714249,0.340769358800715,0.772392697721258  
"6798","FYC01",109.159608974511,0.217556652048536,0.228420833261574,0.  
952437870670939,0.340874960921033,0.772392697721258  
"6799","SLC49A3",80.7529149169061,-0.30484101117786,0.320057845496594,  
-0.952455987150937,0.340865777010551,0.772392697721258  
"6800","AL117336.2",9.60793894432789,0.610179444668106,0.6405767219283  
91,0.952547015494448,0.340819633791494,0.772392697721258  
"6801","ABCB9",4.6514178748682,-0.64185087514774,0.67382166686913,-0.9  
52553036963118,0.340816581587148,0.772392697721258  
"6802","AC006504.5",14.3669114152884,-0.392678447989214,0.412249706666  
334,-0.952525718367676,0.340830429169201,0.772392697721258  
"6803","MT-  
C01",33028.0656638579,-0.226470840837685,0.23766901287874,-0.952883331  
716583,0.340649186279704,0.772392697721258  
"6804","EIF5B",615.038592449327,-0.268590761553169,0.282050759539501,-  
0.952278100550737,0.34095596113646,0.772444961272009  
"6805","FST",624.702184664345,-0.361992745692847,0.380241407015063,-0.  
952007695675571,0.341093079013375,0.772444961272009  
"6806","PRKRIP1",115.011822798477,0.175024416804888,0.183812434908971,  
0.95219029600236,0.341000481512204,0.772444961272009  
"6807","DCAF12",79.0490260017677,0.200122207006995,0.210213048439549,0.  
.951997073885469,0.341098465869514,0.772444961272009  
"6808","PUM1",443.076481612829,0.15482437997878,0.162674920436437,0.95  
1740929477057,0.341228386370136,0.772625672135084  
"6809","SPATA1",7.22499067549198,0.565140437092623,0.594175850081622,0.  
.951133300040702,0.341536712341131,0.772756263134968  
"6810","AC239809.3",17.8758827976764,-0.416461979673779,0.437747274228  
404,-0.951375380709923,0.341413853354004,0.772756263134968  
"6811","ARHGEF33",5.88399039180246,0.698298498698459,0.734104345757641  
,0.951225125874676,0.341490106243939,0.772756263134968  
"6812","PLCB3",50.1318548568759,-0.25223076632218,0.265142909318119,-0.  
.951301194404385,0.34145150083139,0.772756263134968  
"6813","AC007114.1",10.8761496331227,0.519066194842623,0.5456707729569  
26,0.951244267729173,0.341480391330277,0.772756263134968  
"6814","RBM12",107.270896163388,0.178268406535165,0.187467783819427,0.  
950928222989378,0.341640813661704,0.772764951224528  
"6815","BCAP31",437.063591709724,-0.163280797805902,0.171695494901113,  
-0.95099057724224,0.341609159214955,0.772764951224528  
"6816","SNRPD2",1017.40876159928,-0.202390577882993,0.212857341902195,  
-0.950827329113173,0.341692036915703,0.772767422103222  
"6817","MINDY1",58.9932189804773,0.22655784575756,0.238340728789299,0.  
950562863965413,0.341826327707922,0.772844359286833  
"6818","ZNF701",42.8867567753685,0.264697747347009,0.278462546380417,0.  
.950568580183118,0.341823424755205,0.772844359286833  
"6819","CENPF",24.6727955247167,-0.413991618656215,0.435728965177001,-  
0.950112688717041,0.342054996503643,0.772998424468241  
"6820","PBX3",155.081401362066,0.197172929443611,0.207538519286134,0.9  
50054621772488,0.342084499025098,0.772998424468241

"6821", "DMXL2", 54.4748076933087, 0.307603746291477, 0.323781880648575, 0.950033848945805, 0.342095053631031, 0.772998424468241  
"6822", "CMTM3", 726.813764651756, 0.243769312802, 0.256576395954439, 0.950084718024046, 0.342069207586706, 0.772998424468241  
"6823", "ARIH1", 202.392890906198, 0.250339884051535, 0.263566536732047, 0.949816646511696, 0.342205425959421, 0.773134492329543  
"6824", "PDIK1L", 34.6409329169987, -0.331114258434342, 0.34865058319432, -0.949702293341055, 0.342263544153709, 0.773152481408182  
"6825", "AC022382.1", 2.93565332842886, 0.924296392400161, 0.973479368701382, 0.949477125163083, 0.342378000777516, 0.773297711646215  
"6826", "ABI2", 221.039095055186, 0.177800084335388, 0.18736713728274, 0.948939536110246, 0.342651364942695, 0.773501650555982  
"6827", "LRP11", 210.2891079309, 0.186941782164504, 0.197010091296087, 0.948894449693692, 0.342674297736585, 0.773501650555982  
"6828", "GNG11", 1192.43314126272, -0.272844621437658, 0.287590538164208, -0.948726001833446, 0.342759985882227, 0.773501650555982  
"6829", "HOXC8", 154.019181526869, -0.192464223089315, 0.202914255467136, -0.948500255175452, 0.34287484296552, 0.773501650555982  
"6830", "CPM", 23.128090956038, -0.440168620020302, 0.464111330886447, -0.94841170798305, 0.342919901388231, 0.773501650555982  
"6831", "KDM2B", 36.8405656038474, 0.264980167381605, 0.279385275575772, 0.948439987882395, 0.342905510372063, 0.773501650555982  
"6832", "AC009996.1", 8.54863625178442, 0.682851436100585, 0.719988578336568, 0.948419817545185, 0.342915774571701, 0.773501650555982  
"6833", "SRP68", 163.623466416136, -0.175749448231883, 0.185211601418851, -0.94891166042256, 0.342665543540796, 0.773501650555982  
"6834", "SLC25A5-AS1", 6.30991062440398, 0.62220280731923, 0.655827155976594, 0.948729862203869, 0.342758021987816, 0.773501650555982  
"6835", "AC136469.1", 8.33259518001059, -0.505456825575555, 0.533264325214244, -0.94785419101959, 0.343203688267597, 0.774028508360645  
"6836", "HMG2", 1239.50726443138, 0.191887622344423, 0.202499008888411, 0.947597834664786, 0.34333422893905, 0.774209645859487  
"6837", "LRP8", 4.45752603844565, 0.684969198016339, 0.723296042234105, 0.947010847592388, 0.343633251398245, 0.774315991813393  
"6838", "CYP4V2", 135.539052679139, 0.19946832125915, 0.210604407205437, 0.947123205567945, 0.343576001225748, 0.774315991813393  
"6839", "MT2A", 11828.9681543743, -0.567576620336438, 0.599396381485766, -0.946913658253234, 0.343682777553502, 0.774315991813393  
"6840", "UBL5", 1298.28174298505, -0.22546641158485, 0.23805924100798, -0.947102118910362, 0.343586745123563, 0.774315991813393  
"6841", "AC092296.2", 5.71135951839124, 0.729274684892188, 0.770122883386692, 0.946958856338784, 0.343659744754572, 0.774315991813393  
"6842", "ZC3H12B", 8.89967607368147, 0.469766272518943, 0.495919915734044, 0.947262365584999, 0.343505102955684, 0.774315991813393  
"6843", "OAF", 1386.97950913425, 0.300821773696467, 0.3177200649123, 0.946813899775271, 0.343733617641824, 0.774317363137326  
"6844", "C2orf88", 50.8376287876475, 0.389770211151322, 0.411766541812936, 0.946580578002361, 0.343852544577251, 0.774362007733433  
"6845", "ZNF607", 9.8711276706628, 0.485407961156801, 0.51280296763356, 0.9

46577909634223,0.343853904828761,0.774362007733433  
"6846","AF001548.2",8.55513110563983,0.561260447073704,0.5931951807193  
31,0.946164880154788,0.344064495901104,0.774508888134885  
"6847","C16orf54",2.98500775405739,0.830065299457631,0.877259779136715  
,0.946202389757882,0.344045367505832,0.774508888134885  
"6848","PLLP",4.17195212511875,-0.657142582345682,0.69454055980199,-0.  
946154365028055,0.344069858316425,0.774508888134885  
"6849","CLEC3B",2550.89690014599,0.352237549961262,0.372347972095532,0.  
945990246647267,0.34415356093354,0.77458419357432  
"6850","GATAD2B",158.254331216558,0.224296051397783,0.237162742178043,  
0.945747419421383,0.344277429977235,0.774615866511803  
"6851","AC107068.1",5.69554279633922,0.765915285844586,0.8100893092929  
75,0.945470180952093,0.344418887387084,0.774615866511803  
"6852","SORBS1",15.3340627635481,-0.498092637516958,0.526806789735641,  
-0.945493959496815,0.344406753232531,0.774615866511803  
"6853","DNAAF4",39.3421698067339,-0.281354346287962,0.297526176949287,  
-0.945645687962167,0.34432933285569,0.774615866511803  
"6854","AC011477.2",6.36712297758619,0.649088929061647,0.6864207853476  
09,0.94561374439287,0.344345631334092,0.774615866511803  
"6855","CCNT2",108.7359680002,0.206808661492,0.218808413380066,0.94515  
8635800613,0.344577893597055,0.774860427395858  
"6856","CCDC85C",12.3195458066262,0.645559944200041,0.683254377839897,  
0.944831039708774,0.344745142384231,0.775010408320392  
"6857","LINC02246",7.59929133159302,0.587350126904265,0.62162467060106  
9,0.944862961015265,0.344728843210386,0.775010408320392  
"6858","AC012485.3",11.9480096807642,-0.54259806584544,0.5744499544917  
1,-0.9445523697979,0.344887453469782,0.775104256485885  
"6859","BYSL",32.8926771399915,-0.281346078807457,0.297847549765545,-0.  
944597593731837,0.344864355975064,0.775104256485885  
"6860","SDCCAG8",220.66374730178,0.161344142603897,0.170854728408341,0.  
94433524964136,0.344998358306791,0.775226043068439  
"6861","IMPDH2",508.012890445787,-0.219491448246609,0.232458451465456,  
-0.944217974708596,0.345058271726667,0.775226043068439  
"6862","MIEF1",71.66096862048,0.218865163384138,0.231811621297717,0.94  
4150953946558,0.345092514274124,0.775226043068439  
"6863","ZNF554",13.0028138917619,0.434784070110259,0.460665089052701,0.  
943818145638813,0.345262586278673,0.775495084873341  
"6864","BCL7C",680.808865459125,-0.250615168240698,0.265610013261715,-  
0.943545633551693,0.345401885440281,0.775694939402962  
"6865","C1orf220",10.5505140311365,0.456358761416167,0.483941669677657  
,0.943003651080794,0.345679035413709,0.775696729494942  
"6866","ATG7",72.9313201557491,0.216117164683166,0.229191713926468,0.9  
42953656485604,0.345704607955255,0.775696729494942  
"6867","SCRG1",4.99180544087558,0.632591460520865,0.670726071584508,0.  
943144283964458,0.345607107298087,0.775696729494942  
"6868","RAB24",55.01324395135,-0.292227418395481,0.309873141705014,-0.  
943055008858008,0.345652766851559,0.775696729494942  
"6869","UNC13B",32.7994666732273,-0.30125513985195,0.319347336365001,-  
0.943346336565737,0.345503782143618,0.775696729494942  
"6870","MFGE8",891.003341200154,0.159327053944754,0.168879688949341,0.

943435264098263,0.345458312844979,0.775696729494942  
"6871","KLRG1",9.06749402089664,0.488035060109593,0.517765593898082,0.  
942579162967051,0.345896202020611,0.775860901164758  
"6872","ACBD4",49.6182824427144,0.303357745076602,0.321859681463477,0.  
9425155201088,0.34592876897213,0.775860901164758  
"6873","CNFN",7.9465860206406,0.732751671393908,0.777319051994982,0.94  
2665266615179,0.34585214467438,0.775860901164758  
"6874","FRRS1",34.7967071233634,-0.269096183392159,0.285612218656882,-  
0.942173218840596,0.346103962886391,0.775963447315202  
"6875","USF1",25.4821800061157,-0.353777881097934,0.376008386196677,-0  
.940877634875104,0.346767570071549,0.775963447315202  
"6876","CDC42EP3",6.30292190704027,0.618710461968261,0.657085198547867  
,0.941598537504098,0.346398218796665,0.775963447315202  
"6877","AC010680.3",4.68769298374968,0.704980638733139,0.7488447354332  
24,0.941424310508494,0.346487460261848,0.775963447315202  
"6878","POLR1C",52.1291214558309,-0.228069992091741,0.242212840966721,  
-0.941609830351961,0.346392434949732,0.775963447315202  
"6879","DPY19L1",77.0925999125428,0.206217725731853,0.219126529020104,  
0.941089728633149,0.346658878751964,0.775963447315202  
"6880","WASHC1",91.9625076971756,0.289933641254382,0.30768267322211,0.  
942313839834212,0.346031984528018,0.775963447315202  
"6881","FAM225B",10.5633165281148,0.503490397731538,0.534472748629758,  
0.942031935252732,0.34617629000522,0.775963447315202  
"6882","ZRANB1",147.359931638113,0.186614341127786,0.198291458434055,0  
.941111344893597,0.346647802322629,0.775963447315202  
"6883","AP000941.1",2.55263308726377,0.974307390387671,1.0347877836470  
6,0.941552853430269,0.346421617392077,0.775963447315202  
"6884","MARS",51.519438687063,-0.315616104819746,0.335429906077192,-0.  
940930129071777,0.346740666441764,0.775963447315202  
"6885","TMED2-  
DT",2.69696983119038,1.07168292106149,1.1387821902659,0.94107804830637  
5,0.346664863984306,0.775963447315202  
"6886","DGLUCY",105.134735631389,-0.218978609604168,0.232719590625149,  
-0.940954773149659,0.346728036644017,0.775963447315202  
"6887","TTC39C",120.299403721942,-0.22661648406415,0.240539746563637,-  
0.942116582816789,0.3461329553345,0.775963447315202  
"6888","LTN1",227.935210913415,0.158906483279288,0.168708148055333,0.9  
41901651526458,0.346242994511389,0.775963447315202  
"6889","CD40LG",3.831060008625,0.856521398534777,0.910366312393827,0.9  
40853573857029,0.346779901949687,0.775963447315202  
"6890","CCDC74B",27.3657687640405,-0.3241279704166,0.344619364786044,-  
0.940539051303266,0.346941128360796,0.776211537544509  
"6891","TSPAN14",255.873060461891,0.22959219088625,0.244201977462854,0  
.940173348601052,0.347128650041585,0.776485190036912  
"6892","NAT10",56.0566617996001,0.251184222507946,0.267196900815601,0.  
94007161662887,0.347180826694736,0.776485190036912  
"6893","RASSF9",40.9757723384734,-0.267995025355797,0.28509931547877,-  
0.94000585341901,0.347214558217608,0.776485190036912  
"6894","MTRF1",21.3506184068198,-0.319168671001963,0.339643891405166,-  
0.939715622976485,0.347363449260125,0.776686667732423



"6895", "MRPL34", 430.39760263131, -0.242264907463031, 0.25782906271168, -0.939633821397186, 0.347405421603312, 0.776686667732423  
"6896", "KDM4A-  
AS1", 12.6727498614596, 0.48945199588566, 0.521000571578077, 0.939446178347064, 0.347501713332576, 0.776769016163945  
"6897", "GUSB", 487.937653086602, -0.237710121478827, 0.253071059357369, -0.939301878620382, 0.347575774359111, 0.776769016163945  
"6898", "ANKFN1", 3.56806879553388, 0.772171388296442, 0.822099559883708, 0.939267487754975, 0.347593426759578, 0.776769016163945  
"6899", "RAB5IF", 314.925059663737, -0.200718465820325, 0.213736415842672, -0.939093439126772, 0.347682772485779, 0.776856057090635  
"6900", "MACF1", 639.004827353625, 0.239345759314714, 0.254955926012153, 0.938773077599715, 0.347847264322661, 0.776998345099813  
"6901", "KLHDC9", 14.417571880894, -0.465327662541723, 0.495636420560711, -0.938848807792009, 0.347808375667126, 0.776998345099813  
"6902", "FBX044", 36.8657590010025, 0.248096238074801, 0.264335115084608, 0.938567083663444, 0.347953059466591, 0.777009475833333  
"6903", "TADA3", 294.201078456447, -0.237265618646752, 0.252772680471254, -0.938652144703328, 0.347909371016881, 0.777009475833333  
"6904", "SYDE2", 100.985368449059, 0.297418423499943, 0.317156013153927, 0.937766938555868, 0.348364195059351, 0.777589641882406  
"6905", "GTPBP4", 133.945115422961, -0.210669153764026, 0.224645898885827, -0.937783217093564, 0.348355827643198, 0.777589641882406  
"6906", "IDH3B", 253.648476442746, -0.178220801648086, 0.190020865565729, -0.937901220044902, 0.348295176149133, 0.777589641882406  
"6907", "WDR73", 114.899754808115, 0.20106087756997, 0.214442386347446, 0.937598582978855, 0.3484507398802, 0.777670212140333  
"6908", "SDF2", 409.256010285089, -0.224004405952151, 0.23898889111165, -0.937300495057326, 0.348604008383905, 0.777899651018803  
"6909", "STX17-  
AS1", 2.82875325142499, -0.798133633447589, 0.851705575449344, -0.9371003976656, 0.348706916911852, 0.778016662931856  
"6910", "CBR4", 108.090542622152, 0.24339770719347, 0.259834299324272, 0.936742022998707, 0.348891274440776, 0.778165600482235  
"6911", "MAPK8", 88.2236935599726, 0.193760288546775, 0.206897577883187, 0.936503416469049, 0.349014054358187, 0.778165600482235  
"6912", "AL353719.1", 5.09843098102064, -0.664245245807512, 0.709241997739834, -0.93655656027743, 0.348986705738955, 0.778165600482235  
"6913", "DNAAF2", 56.7982965532547, -0.262803230399295, 0.280628752828122, -0.936480056839563, 0.349026076012596, 0.778165600482235  
"6914", "YJU2", 77.763935831693, -0.257946773940045, 0.275330671780894, -0.936861746174495, 0.348829678746423, 0.778165600482235  
"6915", "IFITM1", 411.928073205907, -0.686115605582723, 0.732780815946322, -0.936317641854017, 0.349109667521241, 0.778239410678225  
"6916", "PIGM", 87.4349314924108, 0.256838349622744, 0.274530166835869, 0.935556017697312, 0.349501828717821, 0.77828645939633  
"6917", "TOR1AIP2", 281.675165284435, 0.195023721790596, 0.208552732468068, 0.935129065357396, 0.349721789265664, 0.77828645939633  
"6918", "MTA3", 91.6799975771134, 0.18892799898166, 0.202063578551299, 0.934992839066723, 0.34979198984475, 0.77828645939633

"6919", "KDM3A", 88.0616502074398, 0.257730681321324, 0.275450275197535, 0.935670444099199, 0.349442892581264, 0.77828645939633  
"6920", "SLC16A14", 3.41980964505555, 0.771943472306224, 0.826809245680776, 0.933641558000023, 0.350488820684535, 0.77828645939633  
"6921", "AC116351.1", 2.4539071777286, 1.011876500509, 1.08312223543403, 0.934221888726641, 0.350189447000351, 0.77828645939633  
"6922", "CDKN2AIPNL", 95.7496820962966, -0.281620800709277, 0.301336758344408, -0.934571680722082, 0.350009079101027, 0.77828645939633  
"6923", "LY6G5B", 15.6807472744963, -0.470776941429329, 0.504156839727023, -0.933790646744437, 0.350411895178762, 0.77828645939633  
"6924", "STK19", 166.485308523349, -0.199473431029583, 0.213362813929282, -0.934902513498426, 0.349838541643178, 0.77828645939633  
"6925", "COL21A1", 24.6486508698059, 1.10797184476493, 1.18618522596723, 0.934063096142074, 0.350271346788174, 0.77828645939633  
"6926", "C0Q3", 35.3539926860792, -0.296963487274419, 0.317509902137444, -0.935288900520238, 0.34963943388625, 0.77828645939633  
"6927", "TFB1M", 38.2993226720973, -0.257419646061331, 0.275781454600715, -0.933418987270304, 0.350603680707985, 0.77828645939633  
"6928", "REPIN1", 125.682079260533, -0.196311473155419, 0.210362336020734, -0.933206375575096, 0.350713423551342, 0.77828645939633  
"6929", "AL512625.3", 4.25652063061524, -0.766788174453075, 0.820622835468933, -0.934397802877257, 0.350098730678186, 0.77828645939633  
"6930", "VSIR", 892.672431688699, 0.28123935445456, 0.300621864606781, 0.935525281311212, 0.349517660788327, 0.77828645939633  
"6931", "AP003119.2", 5.46462031133787, 0.621108103794716, 0.664395366736297, 0.934847133034324, 0.349867085452544, 0.77828645939633  
"6932", "DDN-AS1", 4.55956661580672, -0.616781355894939, 0.659080283663385, -0.935821281842426, 0.3493652121638, 0.77828645939633  
"6933", "NR2C1", 86.8528817367737, 0.183719718854425, 0.196593552030522, 0.934515486173735, 0.3500380514688, 0.77828645939633  
"6934", "AC023355.1", 2.84447442310636, -0.805955278228993, 0.861982978281006, -0.935001384640165, 0.349787585848926, 0.77828645939633  
"6935", "TRPM7", 166.84485108562, 0.206196756158328, 0.220317107187256, 0.935908966810612, 0.349320060037805, 0.77828645939633  
"6936", "AC092756.1", 2.78530929565847, 1.00581267089169, 1.07630361551459, 0.934506450032506, 0.350042710397368, 0.77828645939633  
"6937", "REX05", 18.9359942029805, 0.381460941592752, 0.408650515023588, 0.933464972069674, 0.350579947800749, 0.77828645939633  
"6938", "AC002553.1", 2.52723643526555, 0.921235334252264, 0.984044526731358, 0.936172408084294, 0.349184426993472, 0.77828645939633  
"6939", "PIGS", 76.9307118692729, 0.211560676266897, 0.226458192947184, 0.934215156950577, 0.350192918773768, 0.77828645939633  
"6940", "AATF", 157.468036581901, -0.192795852194054, 0.206375367510263, -0.934199921821898, 0.350200776054963, 0.77828645939633  
"6941", "VPS25", 235.986261580053, -0.228934643928744, 0.245303016923224, -0.933272842707832, 0.350679113164071, 0.77828645939633  
"6942", "BST2", 502.872963303138, 0.434686421681734, 0.465008003227381, 0.934793420037503, 0.349894771239392, 0.77828645939633  
"6943", "AC093227.1", 10.3386435573285, 0.509183159721876, 0.5454132309064

02,0.933573171438623,0.3505241097666,0.77828645939633  
"6944","SLC17A7",115.643968543872,0.233295104662989,0.250010169143697,  
0.933142461612829,0.350746417997165,0.77828645939633  
"6945","ZNF444",59.6300983277799,0.236468999699048,0.25320972508172,0.  
933885930418869,0.350362737151176,0.77828645939633  
"6946","MZF1",51.624508285553,0.249074162548402,0.266556827428119,0.93  
4412991599582,0.350090898778285,0.77828645939633  
"6947","IGLC3",37.8424271587237,0.917359811668032,0.982771107147204,0.  
933441983587564,0.350591812105154,0.77828645939633  
"6948","MTF2",122.296160679184,0.218139855015856,0.23396441915098,0.93  
2363373060961,0.351148766789416,0.77834323456679  
"6949","GEMIN6",92.792865947549,-0.279574699358186,0.299827250801034,-  
0.93245259932598,0.351102672375564,0.77834323456679  
"6950","AL357054.4",9.62502981974271,-0.716511303490984,0.768336552767  
711,-0.932548765134183,0.351052997277799,0.77834323456679  
"6951","AL356417.2",16.19794006039,-0.407873802469,0.437213887341501,-  
0.932893062818968,0.350875184508125,0.77834323456679  
"6952","UHRF2",90.0794893880811,0.234253201478925,0.251200835753319,0.  
932533527511684,0.351060868077622,0.77834323456679  
"6953","FAM214B",43.2425137301794,-0.302999810467256,0.32495941325344,  
-0.932423552325108,0.351117677676021,0.77834323456679  
"6954","NPDC1",501.49842878778,0.232351603427854,0.249210339554796,0.9  
3235137772751,0.351154963887954,0.77834323456679  
"6955","RAB5C",619.573495272191,-0.21584941896211,0.231520890616369,-0  
.932310766373876,0.351175945274864,0.77834323456679  
"6956","EFCAB14",352.798858615388,0.181485670146642,0.194967261306129,  
0.930852025775144,0.351930113479137,0.778389266560005  
"6957","AL451085.2",21.2931923806142,-0.400754217846845,0.430474513956  
902,-0.930959220240777,0.35187465910314,0.778389266560005  
"6958","INTU",84.649220953383,0.23700361425488,0.254539396382831,0.931  
107787725021,0.351797810580272,0.778389266560005  
"6959","ZNF622",159.896910688507,-0.210686998284831,0.226297996518314,  
-0.931015747051833,0.351845418599545,0.778389266560005  
"6960","ANXA6",634.628490377871,0.172069069076014,0.184641995813228,0.  
931906462114218,0.351384867723628,0.778389266560005  
"6961","SERAC1",16.378256777514,-0.373501017252291,0.401124051350313,-  
0.931135931627551,0.351783253966963,0.778389266560005  
"6962","PVT1",14.0011608112118,0.429599985324978,0.461079392198361,0.9  
31726710397327,0.35147777891636,0.778389266560005  
"6963","DMAC1",372.280470221456,0.232301112349994,0.249457138468104,0.  
931226557702602,0.351736382862885,0.778389266560005  
"6964","EGFL7",19.3501755299653,-0.432911593005675,0.46452261311722,-0  
.931949448274615,0.35136265107373,0.778389266560005  
"6965","CUL2",138.76993887861,-0.194419853552368,0.208814698475405,-0.  
931064024572328,0.351820446553252,0.778389266560005  
"6966","SIRT1",154.137857332273,0.271674004666847,0.291869766720033,0.  
930805570305752,0.351954147773158,0.778389266560005  
"6967","NLRC5",29.1025247580037,0.367227735875842,0.394403933439464,0.  
931095520963426,0.351804155324548,0.778389266560005  
"6968","SCPEP1",1073.29283485329,0.192421872045638,0.206531675625282,0

.931682132840273,0.351500822851334,0.778389266560005  
"6969","CCDC130",95.3100741762216,-0.190710338914158,0.204651769973093  
,-0.931877300348937,0.351399939981865,0.778389266560005  
"6970","AP001347.1",28.2714316305603,0.391247344963627,0.4202894303063  
56,0.930899796072531,0.351905400026925,0.778389266560005  
"6971","AC005332.4",21.1105733870604,0.399997724641488,0.4298322413344  
24,0.930590323796293,0.352065521698834,0.778523887101926  
"6972","ZDHC2",106.430294936848,-0.263593400803157,0.283346729373732,  
-0.930285665854571,0.352223197472686,0.778662898715633  
"6973","MUS81",75.3036052593144,-0.253473463129281,0.272471934064619,-  
0.930273659191512,0.3522294124388,0.778662898715633  
"6974","SPIN1",229.602783796684,0.174828821286189,0.188021277836316,0.  
929835300015292,0.352456366265486,0.779052894462642  
"6975","ERCC3",77.9944120852822,0.227006471664164,0.244249294395227,0.  
92940482070273,0.352679330457863,0.779284476204006  
"6976","CLN8",114.356029214332,0.217610022187647,0.234155391007745,0.9  
29340218267491,0.352712798603656,0.779284476204006  
"6977","SNAPC3",103.877770939702,0.196359711311287,0.211272997986851,0.  
.929412244737054,0.352675484467444,0.779284476204006  
"6978","FAM20B",115.816497509231,0.206017431060863,0.221760644096905,0.  
.929008083917894,0.352884896916482,0.779329611170139  
"6979","SEMA4C",57.1109788529547,-0.250542708514132,0.269661974765388,  
-0.929099138772197,0.352837710764451,0.779329611170139  
"6980","ZNF763",12.0321529150035,0.427307540314066,0.459878661835524,0.  
.929174531839646,0.352798643833824,0.779329611170139  
"6981","KBTBD4",51.1024123968189,-0.260151589256322,0.280117792005776,  
-0.928722118625574,0.353033114878488,0.779433610119148  
"6982","AC103810.2",3.63350352495947,0.787270537121909,0.8476364681280  
59,0.928783230457907,0.353001436848359,0.779433610119148  
"6983","COA5",218.982987637405,0.217653348696454,0.234485557658714,0.9  
28216436311359,0.353295310187654,0.779565875542898  
"6984","CRYM",11.8092781799837,-0.446236061808711,0.480716832889214,-0.  
.928272178710144,0.3532664018239,0.779565875542898  
"6985","KATNAL2",14.9835856032763,0.516020879876904,0.555763272567624,  
0.928490429914323,0.353153229750251,0.779565875542898  
"6986","MIDN",620.804126457783,-0.334171405022454,0.35999882533217,-0.  
928256931711137,0.353274308866276,0.779565875542898  
"6987","CYSLTR1",4.77271946731515,0.711414441076092,0.766567543332192,  
0.928051868702457,0.35338066472648,0.779642614392256  
"6988","CLIC6",47.1819556882595,0.35302362312533,0.380614222654421,0.9  
27510329654336,0.353661631083576,0.780150836169622  
"6989","AC016727.1",12.2065072535851,0.456621438792639,0.4926237949219  
34,0.92691713940655,0.353969557596673,0.780160241686118  
"6990","PTPRE",53.804298977261,0.422601508135197,0.455684328030521,0.9  
27399697860339,0.353719047471249,0.780160241686118  
"6991","RPLP0",10104.8793069224,-0.157294171407174,0.169688947442277,-  
0.926955902420692,0.353949430448911,0.780160241686118  
"6992","PLCB2",6.08486949440554,-0.699605412730065,0.75470519115472,-0.  
.926991653071379,0.35393086806941,0.780160241686118  
"6993","SHLD1",20.0651040874107,-0.410516933724671,0.442729060143876,-

0.927241897315851,0.353800953989473,0.780160241686118  
"6994","IL13RA1",1036.47131983596,-0.285450568534329,0.307930378906731  
,-0.926997100928418,0.353928039498267,0.780160241686118  
"6995","MAPK3",381.595301460855,-0.16802493069568,0.181300684668277,-0  
.926774937464314,0.354043400140011,0.780211438621626  
"6996","SRGAP2B",165.508265975551,0.24219354500176,0.26136784459809,0.  
926638643610449,0.354114183868765,0.780255881123071  
"6997","PRADC1",112.450494746333,-0.276447528611701,0.298372226799092,  
-0.926518971210567,0.354176342675714,0.78028130946779  
"6998","MAP11",11.5953640554684,-0.436234631313162,0.470937539707351,-  
0.926311016922213,0.354284372200185,0.780327753982268  
"6999","SART3",101.149896807528,0.224672005233054,0.242552096102433,0.  
926283502980623,0.354298666890814,0.780327753982268  
"7000","OAS3",43.0093527688526,-0.407654254561085,0.440223424856143,-0  
.926016725925703,0.354437288077751,0.780521542245503  
"7001","GRK2",97.4361917013103,-0.213641537033489,0.230795438453369,-0  
.925674868035373,0.354614972408316,0.780578294969897  
"7002","GART",78.3699617031957,0.208423892417423,0.225140652961284,0.9  
25749702135157,0.354576071768799,0.780578294969897  
"7003","AL672277.1",3.84642513662984,-0.787156372467114,0.850333901320  
44,-0.925702681317045,0.354600514053171,0.780578294969897  
"7004","CDC42EP1",165.221607353139,-0.222566391322314,0.24051234002158  
3,-0.925384499200091,0.354765938916165,0.780799107423284  
"7005","AC069113.2",3.34913556764845,-0.752484731768784,0.813248750028  
892,-0.925282371158949,0.354819046248044,0.780804510765681  
"7006","ZFP69",12.4602448115854,-0.424557865846216,0.459315015708811,-  
0.924328296106414,0.355315414715608,0.78098587034874  
"7007","RANBP2",188.010045549229,0.196414622962347,0.212426446860988,0  
.924624150451854,0.355161446258091,0.78098587034874  
"7008","DIRC3-  
AS1",2.94134684713595,0.825772062802862,0.893453330029439,0.9242475628  
53286,0.3553574372122,0.78098587034874  
"7009","AMACR",59.8248842371769,0.276430810430566,0.299001377278733,0.  
924513502066158,0.355219024938486,0.78098587034874  
"7010","AC01",174.29516775951,0.212721095751142,0.230115829823364,0.92  
4408789757862,0.355273520056005,0.78098587034874  
"7011","PSMD13",470.31828462381,-0.214561586043583,0.23201193812706,-0  
.924786835434649,0.355076799718151,0.78098587034874  
"7012","ZFP36L1",6478.56118865971,0.206064967215622,0.222892525596357,  
0.924503711662327,0.355224119905896,0.78098587034874  
"7013","AC009113.1",25.2754983431726,0.297073497165099,0.3211689782333  
18,0.924975689742009,0.354978553001738,0.78098587034874  
"7014","SPC24",4.94866177539757,0.744087778664958,0.804922032387459,0.  
924422178453654,0.355266551922444,0.78098587034874  
"7015","TTC30A",14.5791914329306,0.416230862974188,0.450397151651304,0  
.924141863349155,0.35541245964191,0.780995447666434  
"7016","PTER",95.09372729466,0.21539897580168,0.233104588432658,0.9240  
44340997206,0.355463230179571,0.780995680333251  
"7017","AG01",86.6511290240604,0.225742013512677,0.24435590868806,0.92  
3824656930459,0.355577615370639,0.781024357500485

"7018", "ING2", 134.797121224353, 0.20907974590142, 0.226299042747466, 0.92390910435595, 0.355533642503054, 0.781024357500485  
"7019", "CDC42", 1650.02428377961, -0.206556641085648, 0.223648070185835, -0.92357891089342, 0.355705598030781, 0.781187979702752  
"7020", "ZNF791", 221.768770616342, 0.224208297393706, 0.242784460162991, 0.923487019075215, 0.355753462050816, 0.781187979702752  
"7021", "AIMP1", 291.290014523745, -0.136623099436059, 0.147996193106508, -0.923152795813712, 0.355927584370374, 0.781290338232713  
"7022", "ZNF608", 11.4617378847677, 0.61718218052107, 0.668461811234084, 0.923287119995166, 0.355857598228815, 0.781290338232713  
"7023", "LINC00472", 25.3604649773498, 0.493889898138739, 0.535030713425329, 0.923105694207344, 0.355952127499731, 0.781290338232713  
"7024", "LINC01637", 18.2402363140248, -0.445345367503238, 0.482508330106787, -0.922979645563167, 0.356017812635729, 0.781323260503953  
"7025", "APLF", 19.1495337477769, 0.336722333755386, 0.365193546548014, 0.922038017753185, 0.356508745536394, 0.781346166486234  
"7026", "CARD6", 183.434426898081, 0.195597865293858, 0.211961090941761, 0.92280080473638, 0.356111021389115, 0.781346166486234  
"7027", "AL355347.1", 2.82824720906723, -0.79115946512713, 0.857856836227227, -0.922251163267025, 0.356397581332764, 0.781346166486234  
"7028", "NDUFB9", 675.595347200816, -0.229986888722132, 0.249347447903741, -0.92235509388858, 0.356343385138313, 0.781346166486234  
"7029", "STK33", 3.30273331996788, -0.987654621014929, 1.0706738581383, -0.92246076011632, 0.356288289211675, 0.781346166486234  
"7030", "PRDX5", 1828.2153452772, -0.231837642441162, 0.251454229014672, -0.921987446183038, 0.35653512390945, 0.781346166486234  
"7031", "AC026356.1", 2.71353545503674, 0.890189100144482, 0.96479906046647, 0.922667876266469, 0.356180311381033, 0.781346166486234  
"7032", "YEATS4", 103.661260475601, -0.253552250030957, 0.274995687000915, -0.922022642595532, 0.356516765162094, 0.781346166486234  
"7033", "RNF152", 10.5244408497612, -0.569250047811007, 0.616991470200633, -0.922622232728596, 0.356204105387931, 0.781346166486234  
"7034", "UBE2V1", 614.358982233046, -0.159498090433178, 0.172969627696311, -0.922116168933513, 0.356467983925688, 0.781346166486234  
"7035", "SMKR1", 2.51088809255438, 1.09943414609607, 1.19283241323504, 0.921700428238976, 0.356684857142016, 0.781460484145209  
"7036", "NME3", 516.106163012171, -0.224952175015668, 0.244064074693854, -0.921693105787244, 0.356688677680551, 0.781460484145209  
"7037", "ELOVL1", 220.966564361618, -0.198914176724265, 0.216012534156509, -0.920845531028972, 0.357131079742057, 0.781652079259379  
"7038", "PLPP1", 1045.48002573398, 0.295669983900029, 0.320972220594452, 0.92117001076429, 0.356961672746929, 0.781652079259379  
"7039", "SLC22A23", 24.3871659689378, 0.346232604147458, 0.375992453191423, 0.92084987666278, 0.357128810604067, 0.781652079259379  
"7040", "CASC15", 10.5531235930183, -0.478242546987281, 0.519244807561962, -0.92103481830237, 0.357032248964436, 0.781652079259379  
"7041", "AC104051.2", 16.9832422568861, 0.607227581213208, 0.65921230987928, 0.921141143927375, 0.35697674172613, 0.781652079259379  
"7042", "BBIP1", 168.188236383045, -0.195799973306383, 0.212576524373393, -0.921079944662462, 0.357008690107179, 0.781652079259379

"7043", "AC022150.4", 6.51065427022449, 0.675181727444582, 0.7327963103388  
26, 0.921377083807089, 0.356853588848008, 0.781652079259379  
"7044", "ATP5PD", 1047.07802239072, -0.227394479001, 0.246985093081764, -0.  
920680985899509, 0.357217006135016, 0.781729152409322  
"7045", "ANKRD53", 8.88721542285209, -0.460960120400667, 0.500822632471804  
, -0.920405929192144, 0.357360671365286, 0.781737807623851  
"7046", "VPS4B", 449.098596503838, 0.162417796940463, 0.176431026891668, 0.  
92057389112285, 0.357272938624166, 0.781737807623851  
"7047", "ZNF182", 24.3416535582564, 0.295908921085967, 0.321506588339939, 0.  
.920382137777821, 0.357373099599434, 0.781737807623851  
"7048", "FBX042", 92.3419650270146, 0.222126635305293, 0.241575376082304, 0.  
.919492039741728, 0.357838267365714, 0.781802984589317  
"7049", "THEMIS2", 11.5583793032628, -0.46853627976055, 0.509673469951685,  
-0.919287165967193, 0.357945388906143, 0.781802984589317  
"7050", "SOWAHC", 116.275484661742, 0.216730664129892, 0.23559698152835, 0.  
919921226171618, 0.357613925764898, 0.781802984589317  
"7051", "RGPD5", 42.6112535583017, 0.41792096042843, 0.454594493480688, 0.9  
19326930752151, 0.357924595672184, 0.781802984589317  
"7052", "DLC1", 821.342208518209, 0.207446558728001, 0.225498950728726, 0.9  
19944674055525, 0.357601671787335, 0.781802984589317  
"7053", "ZBED5", 143.677453527674, 0.189283015864887, 0.205805374628019, 0.  
91971852633589, 0.357719868698591, 0.781802984589317  
"7054", "GIT2", 122.398664081741, 0.239078498560595, 0.259972421638413, 0.9  
19630232521825, 0.357766022448594, 0.781802984589317  
"7055", "GNG2", 172.743889308926, -0.260793015066103, 0.283699562300709, -0.  
.91925772796813, 0.35796078269422, 0.781802984589317  
"7056", "NEK8", 13.6851461472243, -0.405052381594926, 0.440623636079294, -0.  
.919270661917087, 0.357954019191742, 0.781802984589317  
"7057", "TTPAL", 57.2156713301712, -0.216617189585365, 0.235581090230082, -  
0.919501600802525, 0.357833268704451, 0.781802984589317  
"7058", "URB1-  
AS1", 26.329547435172, 0.440574873583706, 0.47905459878146, 0.919675700232  
015, 0.357742254683236, 0.781802984589317  
"7059", "TFAP2E", 3.35924837990059, -0.782209038174658, 0.851672203395329,  
-0.918439083788639, 0.358389036908856, 0.781984610816457  
"7060", "CCN1", 2416.71644530304, 0.299267138547436, 0.326365230398066, 0.9  
16970040535326, 0.359158339532778, 0.781984610816457  
"7061", "NEK7", 217.646358531307, 0.163523959894356, 0.178357204380579, 0.9  
16834060402899, 0.359229601499007, 0.781984610816457  
"7062", "MIR29B2CHG", 20.0849487213878, 0.463727819779515, 0.5058871696658  
59, 0.916662543716635, 0.359319499479776, 0.781984610816457  
"7063", "ARL6IP6", 109.946328271803, -0.219001732721615, 0.238597222094186  
, -0.917872097585295, 0.358685831050173, 0.781984610816457  
"7064", "BZW1", 1067.32763901072, 0.1433357814167, 0.156117120909267, 0.918  
129802688359, 0.358550913791139, 0.781984610816457  
"7065", "AC008875.2", 4.63906000846303, -0.615773559188495, 0.670993362602  
581, -0.917704396955724, 0.358773645093685, 0.781984610816457  
"7066", "NR2F1", 15.6693516281241, 0.479860972514887, 0.522867823290337, 0.  
917748140429042, 0.358750738144656, 0.781984610816457  
"7067", "RNF44", 68.0685286212388, 0.270910792958389, 0.295148952473602, 0.

917878212637803,0.358682629245526,0.781984610816457  
"7068","RAB23",165.051197522481,0.184319446388727,0.200584865207419,0.  
918910039389702,0.358142628342977,0.781984610816457  
"7069","ZC2HC1A",286.934400951952,-0.197402358912534,0.214884123392074  
, -0.918645620702078,0.358280961655518,0.781984610816457  
"7070","GSDMD",239.032120111081,-0.198985000875712,0.216564640263482,-  
0.918824978231061,0.358187125282371,0.781984610816457  
"7071","AL731563.3",3.28142496124934,0.823691862182272,0.8980158393020  
94,0.917235338323671,0.359019332726204,0.781984610816457  
"7072","ANO4",2.64408169693733,1.04069847745502,1.13526308135179,0.916  
702475884119,0.359298568351604,0.781984610816457  
"7073","POGLUT2",54.2355784247286,0.257153678466866,0.280323898282121,  
0.917344828759708,0.358961973408462,0.781984610816457  
"7074","SPRED1",174.178099957748,0.206547035672018,0.224999136615613,0.  
.917990347780229,0.358623919146981,0.781984610816457  
"7075","CMTM4",17.623266706719,0.433010454672684,0.47232834660752,0.91  
6757289251777,0.359269838235675,0.781984610816457  
"7076","RTN4RL1",6.3772812227076,0.998743243161599,1.08879918541959,0.  
917288749418666,0.358991351261543,0.781984610816457  
"7077","CNP",205.311375650118,0.159603160884069,0.174045094006629,0.91  
7021889039803,0.359131170062175,0.781984610816457  
"7078","ARSG",59.4404074702026,-0.261641141149501,0.284992677281666,-0.  
.918062680224284,0.3585860515768,0.781984610816457  
"7079","CASKIN2",29.3852821565536,0.327515698437385,0.356480253425894,  
0.918748500905308,0.358227134841845,0.781984610816457  
"7080","AC092279.1",24.7940018017859,0.454184864290112,0.4955213741316  
32,0.91657976426555,0.359362892184481,0.781984610816457  
"7081","CHD6",225.524712351552,0.188352681057038,0.205406962468763,0.9  
16973206717285,0.359156680364232,0.781984610816457  
"7082","PHKA1",3.7173436919633,-0.694359700982433,0.757322026206202,-0.  
.916861885637767,0.359215018638772,0.781984610816457  
"7083","TCEAL3",132.318203548813,-0.250147377062324,0.272315388527887,  
-0.918594349054594,0.358307788826802,0.781984610816457  
"7084","NKAP",240.483132074519,-0.181349507138669,0.197835394282243,-0.  
.916668666881447,0.359316289868537,0.781984610816457  
"7085","TBL2",107.117907982986,-0.243705800116625,0.265944531051294,-0.  
.916378310744882,0.359468507186115,0.782104027985033  
"7086","MRPL20-  
AS1",39.420600555319,-0.342427248783058,0.373772650372755,-0.916137787  
078758,0.359594630830372,0.782157645583489  
"7087","TUBG1",45.87122239173,-0.332029521249252,0.362402311278208,-0.  
916190407500908,0.359567035829764,0.782157645583489  
"7088","PPP1R3E",20.1864995086316,0.34468810905427,0.376316637425565,0.  
.915952351754445,0.35969188671858,0.782258808375692  
"7089","MTERF4",118.815114741936,-0.184503526505471,0.201690162710057,  
-0.914786938670416,0.360303492988831,0.782350176362809  
"7090","NR3C2",41.629966026908,0.330771189353757,0.361612451430599,0.9  
14711835959107,0.360342929106451,0.782350176362809  
"7091","AC002454.1",3.03985247279344,0.938985883565617,1.0255853528903  
8,0.915560933977163,0.359897229154673,0.782350176362809



"7092", "ARHGEF5", 32.7821195590783, -0.295520736296403, 0.322921485317654, -0.915147333741832, 0.360114288748809, 0.782350176362809  
"7093", "PSMB7", 662.35353293673, -0.222706925449462, 0.243291567093297, -0.915391059830935, 0.359986370061745, 0.782350176362809  
"7094", "CNPY2", 588.209692815919, 0.213534734609857, 0.233415719636313, 0.914825852100137, 0.360283060776222, 0.782350176362809  
"7095", "KBTBD7", 87.2169187615019, 0.190475642836946, 0.208075855788771, 0.915414439195234, 0.359974100993525, 0.782350176362809  
"7096", "TMEM219", 650.436861521181, -0.223833711326453, 0.244611540663201, -0.91505785344218, 0.360161259296214, 0.782350176362809  
"7097", "HOXB3", 60.2723713426644, 0.283601690713122, 0.309901494341601, 0.915134957047063, 0.360120785370094, 0.782350176362809  
"7098", "SF3A2", 119.186819460729, -0.276950240724539, 0.302597980206472, -0.915241537751068, 0.360064842758884, 0.782350176362809  
"7099", "GRWD1", 78.0094413786571, -0.213519025545452, 0.233402956695642, -0.914808572129105, 0.360292133853328, 0.782350176362809  
"7100", "GGT5", 380.545876854365, -0.301592265919943, 0.329507930968093, -0.915280749188239, 0.360044262637351, 0.782350176362809  
"7101", "RPS8", 17812.6172524939, -0.20410962050722, 0.223351365495307, -0.913849888737343, 0.360795727933201, 0.78248555485739  
"7102", "TTLL7", 61.5045920873805, 0.263327543577512, 0.288037538369245, 0.914212588638163, 0.360605150636993, 0.78248555485739  
"7103", "ADCYAP1R1", 3.84088392736449, 0.826168289602146, 0.904024032275888, 0.913878680329174, 0.360780597349951, 0.78248555485739  
"7104", "CTR9", 220.890923977062, 0.17472820386035, 0.191083482748285, 0.914407678504163, 0.360502668609609, 0.78248555485739  
"7105", "BIRC3", 33.8227351141205, -0.463449748241651, 0.50695847153724, -0.914176947938836, 0.360623874912446, 0.78248555485739  
"7106", "RAP1B", 1681.05372565248, 0.190127592784769, 0.208079999902425, 0.913723533611716, 0.36086213489985, 0.78248555485739  
"7107", "CLN6", 28.7423341169824, -0.321179315707544, 0.351333961745472, -0.914170990222193, 0.360627004930956, 0.78248555485739  
"7108", "LCA5L", 4.95082421745798, -0.717637345961865, 0.785389450739723, -0.913734383987402, 0.360856432095488, 0.78248555485739  
"7109", "WWC3", 141.111897652355, -0.232171551123515, 0.254036613410536, -0.913929484441338, 0.360753899698234, 0.78248555485739  
"7110", "TSBP1-AS1", 6.85433397523608, -0.615306602074308, 0.673769166451386, -0.91323057318727, 0.361121287577755, 0.78289800375653  
"7111", "EBLN3P", 253.13104285002, 0.160466996102882, 0.175725502997859, 0.913168512056203, 0.361153921810748, 0.78289800375653  
"7112", "GBP1", 216.033911183669, 0.310844694993615, 0.340650935797825, 0.912502102087575, 0.361504463466133, 0.783048535351666  
"7113", "C2CD6", 13.6125140379108, 0.457781230951079, 0.502199356400749, 0.911552802918718, 0.362004177298512, 0.783048535351666  
"7114", "HUS1B", 2.6280534422681, -0.9040264241794, 0.991710769941012, -0.911582743256054, 0.361988410010878, 0.783048535351666  
"7115", "OSTM1", 134.018529123072, 0.168727069609139, 0.185014101036261, 0.911968702191359, 0.361785193464662, 0.783048535351666  
"7116", "AL356124.1", 4.19013042725785, 0.881488405383808, 0.9656272422518

9,0.912866131788218,0.361312951947322,0.783048535351666  
"7117","MAFK",80.0411269128007,-0.271033132729389,0.297090342069592,-0  
.912291967626135,0.361615041569693,0.783048535351666  
"7118","LAMTOR1",795.216613948616,-0.22479975337787,0.2463307261719,-0  
.912593231349449,0.361456515519177,0.783048535351666  
"7119","CDCA4",44.4722961506121,-0.278622957498238,0.305618713855734,-  
0.911668510030312,0.36194324558717,0.783048535351666  
"7120","ZNF263",59.6269674585047,-0.203277771078488,0.22296335728752,-  
0.911709320991043,0.361921755946307,0.783048535351666  
"7121","LINC02185",7.16210261897619,-0.778812801242198,0.8536295586547  
67,-0.912354537569585,0.361582113455917,0.783048535351666  
"7122","MYO15A",3.55258507867761,0.844555598775428,0.925805640237533,0  
.912238554259337,0.36164315242252,0.783048535351666  
"7123","RFFL",42.9554667902704,0.287995231572641,0.31579121476366,0.91  
1979871853553,0.361779313436992,0.783048535351666  
"7124","PSMD3",291.46333797094,-0.198953476031997,0.218054675154848,-0  
.912401790471648,0.361557247347673,0.783048535351666  
"7125","SUPT5H",196.6130031616,0.208522231554244,0.228794402597303,0.9  
11395686201556,0.362086925720835,0.783048535351666  
"7126","BCR",45.1265619697486,-0.282871857764022,0.310299432191208,-0.  
91160933091787,0.361974408681977,0.783048535351666  
"7127","CTPS2",43.871906856835,0.258613316394015,0.283332247473189,0.9  
12756379481608,0.361370684577138,0.783048535351666  
"7128","ZDHC9",192.917003925368,-0.238491798692247,0.261673666347521,  
-0.911409245038485,0.362079784241628,0.783048535351666  
"7129","CALHM5",62.9567838397302,0.217434782153431,0.238640975446314,0  
.911137669240485,0.36222840829693,0.783232584007535  
"7130","AC002558.3",44.4901152430141,0.310024159677858,0.3403478331103  
58,0.910903873970992,0.362346024320572,0.783389055385922  
"7131","TOMM20",1122.66987479985,-0.179621023169428,0.19731601571711,-  
0.910321559639379,0.362652951732242,0.783704438688522  
"7132","ZCCHC4",27.0919275091322,0.324352988532886,0.356238259260181,0  
.910494535894283,0.36256176206703,0.783704438688522  
"7133","CALU",1255.14012956206,-0.18290637961807,0.200908117016629,-0.  
910398157795341,0.36261256892569,0.783704438688522  
"7134","ZC3HAV1L",4.01849994460238,0.699649436923041,0.768807376086895  
,0.910045166949546,0.362798690304131,0.783704438688522  
"7135","TMC5",2.83904533070762,1.27560573949284,1.40174917024382,0.910  
009983648472,0.362817244670074,0.783704438688522  
"7136","MATK",5.37376621005814,-0.814922756671973,0.89556667475736,-0.  
909952077987675,0.362847783257865,0.783704438688522  
"7137","PARD6B",3.44196928870088,0.701800237661178,0.771118379068689,0  
.910107003945063,0.362766081209529,0.783704438688522  
"7138","CD72",11.581446076936,0.527453099194927,0.579786543872392,0.90  
973670356692,0.362961382660148,0.783839971099213  
"7139","SMIM12",129.111200977493,-0.241918003950537,0.266077814628334,  
-0.909200206294747,0.363244455341036,0.783935145648484  
"7140","IP09-  
AS1",9.60155882141786,0.484432615596668,0.532633675750587,0.9095042946  
99365,0.363083991865047,0.783935145648484

"7141", "PLEKHM3", 70.1702780641447, 0.254623176874922, 0.279990787911676, 0.909398408333503, 0.363139861680807, 0.783935145648484  
"7142", "RPS27L", 1459.16672024208, -0.214856989340386, 0.236273468240295, -0.909357241592068, 0.363161584326934, 0.783935145648484  
"7143", "AC027277.1", 5.25821532133528, -0.695307538907823, 0.764770694979 982, -0.909171263323608, 0.363259730481162, 0.783935145648484  
"7144", "PRKAA2", 27.1808664867572, 0.390391810353414, 0.429490105014433, 0.908965784765391, 0.363368186804848, 0.784059434434033  
"7145", "EPHX2", 46.918337664162, 0.277405022524438, 0.305280832975812, 0.908687976969775, 0.363514852378963, 0.784266123082116  
"7146", "WNT4", 3.1170073536088, 1.03723143275622, 1.1443815051101, 0.90636 8573875569, 0.364740800704828, 0.784507674118327  
"7147", "GPATCH3", 30.0434213750238, 0.279081462364667, 0.307257714993026, 0.908297656158127, 0.363720980524752, 0.784507674118327  
"7148", "ABHD10", 69.1962802555054, 0.218217020899653, 0.240652083222732, 0.906773870300078, 0.364526390362278, 0.784507674118327  
"7149", "MSH3", 100.340262037942, 0.243097171047113, 0.268155614856979, 0.906552604452339, 0.364643434890269, 0.784507674118327  
"7150", "FUT10", 53.5502666400769, -0.245107242138435, 0.270047204216303, -0.907645916386192, 0.364065326750483, 0.784507674118327  
"7151", "TCEA1", 703.985871828925, -0.143838885292049, 0.158468228095978, -0.907682801911132, 0.364045832870896, 0.784507674118327  
"7152", "PPA1", 952.079556525688, -0.195579436770615, 0.215650934889633, -0.906925986064978, 0.36444593825287, 0.784507674118327  
"7153", "REX02", 943.722068428972, -0.243710148744891, 0.268441285927306, -0.907871335450569, 0.363946203703906, 0.784507674118327  
"7154", "SNX19", 71.5773582296708, 0.202685821202072, 0.223227962913026, 0.907976843748029, 0.363890456058768, 0.784507674118327  
"7155", "BCDIN3D-AS1", 2.39211441402363, 0.969527161691442, 1.06857622393301, 0.90730744328 467, 0.364244239152122, 0.784507674118327  
"7156", "DIS3", 240.704947713038, 0.171632276137586, 0.189300664743222, 0.906664941564773, 0.364584008215451, 0.784507674118327  
"7157", "IP04", 24.1078758629577, -0.305792047868966, 0.337092968466968, -0.907144546086643, 0.364330364042743, 0.784507674118327  
"7158", "NEDD8", 1247.21569740835, -0.230772956252128, 0.254599981300778, -0.906413877460182, 0.364716830243837, 0.784507674118327  
"7159", "DI02", 18.1338630549921, -1.00109979743517, 1.10317973546838, -0.907467537019367, 0.364159608873656, 0.784507674118327  
"7160", "AP4E1", 34.8226317318646, 0.299620629658454, 0.330426094094731, 0.906770485180127, 0.364528180835757, 0.784507674118327  
"7161", "SNN", 41.0593996829243, 0.305173659251101, 0.336059851906293, 0.908093178997758, 0.363828993944118, 0.784507674118327  
"7162", "ABR", 103.196190949099, 0.236664810485453, 0.260890073191982, 0.907143792747137, 0.364330762368189, 0.784507674118327  
"7163", "GNA13", 182.92705751411, 0.174625064075239, 0.192625453071864, 0.906552385940869, 0.3646435504894, 0.784507674118327  
"7164", "POP4", 133.500924322431, -0.206889244100271, 0.228264401977564, -0.90635790034666, 0.364746448291018, 0.784507674118327  
"7165", "TMEM238", 21.5157035377507, -0.497106151994297, 0.547856843946677

, -0.907365048893468, 0.364213785709269, 0.784507674118327  
"7166", "NOL4L", 23.132593055771, 0.355247528368799, 0.391173511926191, 0.9  
08158445134774, 0.363794515451466, 0.784507674118327  
"7167", "GPC4", 147.200275105846, 0.19443545218625, 0.214402083534245, 0.90  
6872960286295, 0.364473981658352, 0.784507674118327  
"7168", "AC087623.3", 7.66591972350941, -0.50779325932552, 0.5605458577600  
1, -0.905890664065748, 0.364993726269528, 0.784601630239127  
"7169", "IPPK", 22.3192100342049, -0.294458916016941, 0.325031381052846, -0  
.90593995897604, 0.364967632718214, 0.784601630239127  
"7170", "BRF1", 56.6660288255313, 0.215255500671876, 0.237575137255228, 0.9  
06052304794106, 0.364908168430413, 0.784601630239127  
"7171", "TLK2", 142.932596472014, 0.192406634053633, 0.212345145892843, 0.9  
0610328408792, 0.364881187247088, 0.784601630239127  
"7172", "AC093297.2", 17.8935216681984, 0.329812765149536, 0.3641216959923  
01, 0.905776197297812, 0.365054322100186, 0.784604035410021  
"7173", "PJA2", 641.775575842873, 0.122024245455377, 0.134729766306841, 0.9  
05696260004437, 0.36509664262057, 0.784604035410021  
"7174", "DTX2", 58.4756151585051, 0.229332493624344, 0.253300835848842, 0.9  
05375984472466, 0.365266234098657, 0.784640328683222  
"7175", "SEC11A", 1844.54706746062, -0.230745122194822, 0.25481058008481, -  
0.905555499767795, 0.365171171561862, 0.784640328683222  
"7176", "TCF3", 130.277889502078, 0.156469614682187, 0.172809305968333, 0.9  
05446693425528, 0.365228788244501, 0.784640328683222  
"7177", "ADCY2", 11.6184662481277, -0.517941705366404, 0.572319367091904, -  
0.904987206702777, 0.365472164793617, 0.784863948215882  
"7178", "DOCK1", 275.42077109394, 0.213948302863075, 0.23638972287904, 0.90  
5066008189163, 0.36543041878158, 0.784863948215882  
"7179", "AJUBA", 5.70598382756002, 0.708492476561072, 0.783125215928227, 0.  
904698842727604, 0.365624954373806, 0.785082695594404  
"7180", "ABCC10", 19.5994447902672, -0.341202515446913, 0.37728070734455, -  
0.904373080321096, 0.365797607459285, 0.785234663554502  
"7181", "ATP5F1E", 3312.61168191208, -0.233032938558653, 0.257658083093004  
, -0.90442704440418, 0.365769003143496, 0.785234663554502  
"7182", "COL15A1", 122.860113725736, -0.390695778888146, 0.432065830645503  
, -0.904250582149599, 0.365862544279889, 0.785264706220341  
"7183", "TXNDC9", 155.392083967906, -0.226934786067497, 0.251166175473463,  
-0.903524471954521, 0.366247606179554, 0.785484642138322  
"7184", "TMEM115", 236.097251614273, -0.206892690676, 0.229006124766243, -0  
.903437368267702, 0.366293814920231, 0.785484642138322  
"7185", "ACOX2", 76.0741433339363, 0.263116546566648, 0.291103460525537, 0.  
903859219301744, 0.36607005565204, 0.785484642138322  
"7186", "BCLAF1", 1105.88562171855, 0.198253536853101, 0.21943183007256, 0.  
903485774090042, 0.366268135052072, 0.785484642138322  
"7187", "CLPB", 39.806096858278, -0.253726915517123, 0.280862503143042, -0.  
903384797464048, 0.366321705632981, 0.785484642138322  
"7188", "GOLGA6L9", 13.7415187996613, -0.544266298054164, 0.60247328102805  
5, -0.903386615129939, 0.366320741273375, 0.785484642138322  
"7189", "MED26", 42.4172519959431, 0.341622426129774, 0.378107262868119, 0.  
903506649246592, 0.366257060878245, 0.785484642138322  
"7190", "PTBP3", 176.918263174197, 0.197551934197462, 0.218710912817613, 0.

903255953955093,0.36639006737601,0.785521959471654  
"7191","COL5A2",1665.44507984707,0.311013393968268,0.344484494407019,0  
.902837134959102,0.366612339174691,0.785889195991916  
"7192","BBS5",53.1066516744165,0.241726536293452,0.267921622812909,0.9  
02228546376975,0.366935473581447,0.786361991868373  
"7193","AP2A2",255.895604252481,0.20248100203738,0.224403421579846,0.9  
02307997854368,0.366893278185347,0.786361991868373  
"7194","IFT52",204.431006818915,-0.205705633089844,0.228021267277415,-  
0.902133540199909,0.366985933798318,0.786361991868373  
"7195","CAPN10",37.2505135700415,0.25600923470685,0.283897292167992,0.  
901767088906786,0.367180605990159,0.786451025076217  
"7196","SLAIN2",221.595519466833,0.167686589469347,0.185973102330289,0  
.901671195286801,0.367231558773832,0.786451025076217  
"7197","PDCD6",636.429215779525,-0.206584398593279,0.229080632797595,-  
0.901797747240409,0.367164316707201,0.786451025076217  
"7198","DOK6",31.4788171143739,0.500700061948805,0.555190947537428,0.9  
01851991949221,0.367135496693848,0.786451025076217  
"7199","ATG5",156.277632060476,-0.189411531564791,0.210144713735108,-0  
.901338549983933,0.367408342994135,0.786571245041424  
"7200","NUDT4",323.131225316609,0.345311003594128,0.383135038394688,0.  
901277536612051,0.367440774281109,0.786571245041424  
"7201","HDDC3",111.096483938239,0.227632940316981,0.252557215074072,0.  
901312363023243,0.367422262295459,0.786571245041424  
"7202","KIF1B",322.023590762186,0.258239812343512,0.286634230200165,0.  
900938496296049,0.367621021589672,0.78681351541376  
"7203","GPRC5A",601.159422889681,-0.566893045304081,0.62933806493713,-  
0.900776668197741,0.367707075254021,0.78681351541376  
"7204","DDX54",138.645802220385,-0.14785216069892,0.164128672051149,-0  
.900830786304322,0.36767829602861,0.78681351541376  
"7205","HOXB-  
AS3",2.75407155631776,-0.766076049887794,0.850562166773769,-0.90067026  
2343744,0.367763664437423,0.786825383386936  
"7206","GRAMD4",36.6993161628217,0.324681651588903,0.360563429349854,0  
.900484145533973,0.367862658857242,0.786927960905409  
"7207","ID3",1728.21442420172,-0.32798212949773,0.36437725984169,-0.90  
0116899831313,0.368058043324476,0.787236677930734  
"7208","TMA7",2234.82336849698,-0.217979206781931,0.242237181612376,-0  
.89985858211783,0.368195513907805,0.787317151970566  
"7209","ZNF195",65.8772868620677,-0.21503813242721,0.23896995678063,-0  
.899854255004159,0.368197816967616,0.787317151970566  
"7210","POU3F1",7.54684630566849,-0.707145893781341,0.785989072707421,  
-0.899689217491922,0.368285663105708,0.787395769316851  
"7211","DUSP5",81.4068030349024,-0.500899392031078,0.556824423028842,-  
0.89956433539039,0.368352143998721,0.787428692239674  
"7212","ZNHIT6",134.914935067836,0.228615111712215,0.254241529340074,0  
.899204438809127,0.368543776450619,0.787729106209968  
"7213","CYP4X1",43.9146556758669,0.43838300959475,0.487677772260058,0.  
898919398280425,0.368695594666373,0.787816098917378  
"7214","APEH",93.4065537106086,-0.1774774431881,0.197497668350949,-0.8  
98630574578361,0.368849467558081,0.787816098917378

"7215", "CRYBG3", 228.045135740885, 0.23131165288503, 0.257391415232561, 0.898676642637957, 0.36882492179263, 0.787816098917378  
"7216", "PDE8B", 6.93836573479667, -0.487573425594988, 0.542529506143278, -0.898703978445411, 0.368810357337483, 0.787816098917378  
"7217", "TEFM", 64.3889580005099, 0.223843768877038, 0.249169173635314, 0.898360602201368, 0.368993333388483, 0.787816098917378  
"7218", "AC144831.1", 30.9460952670478, 0.365791659495141, 0.407135937464191, 0.898450924704512, 0.368945197461405, 0.787816098917378  
"7219", "PEX26", 96.1879467572798, 0.238107838318156, 0.264890688783905, 0.898890932751516, 0.368710758105993, 0.787816098917378  
"7220", "SMDT1", 722.159720583684, -0.250884505578695, 0.279253805580431, -0.898410336995158, 0.368966827545841, 0.787816098917378  
"7221", "AKR1E2", 5.11163501568198, 0.660515541551651, 0.735588954926453, 0.897941081262826, 0.36921696153594, 0.788184387491555  
"7222", "MRPL15", 189.501280417844, -0.277492305888594, 0.309115942935005, -0.897696518833191, 0.369347365879737, 0.788353592500159  
"7223", "LIMS2", 202.764273864075, 0.19593460076386, 0.218373956949555, 0.897243441941759, 0.36958902890838, 0.788438620990724  
"7224", "DDX56", 112.421155292092, -0.190397250516969, 0.212220005880232, -0.897169188773002, 0.3696286435788, 0.788438620990724  
"7225", "DDX19B", 136.73843975378, -0.1940157573061, 0.216259713798987, -0.897142393735141, 0.369642939597792, 0.788438620990724  
"7226", "STX8", 351.327219451588, -0.242438019714155, 0.270211333915202, -0.897216323983792, 0.369603496253947, 0.788438620990724  
"7227", "EBF4", 4.13062362944939, 0.655652876581025, 0.730718612789935, 0.897271350565022, 0.369574140112907, 0.788438620990724  
"7228", "CNNM1", 4.36759569198544, -0.688451095642751, 0.767704383325014, -0.89676587837234, 0.369843859058702, 0.788648926184796  
"7229", "ZFP64", 43.7564328590662, 0.235688340788528, 0.262798369348215, 0.896840955950661, 0.369803790080686, 0.788648926184796  
"7230", "LOXL1", 709.421418293534, 0.320279121194281, 0.357188108657609, 0.896667927714504, 0.369896139477823, 0.78865131259345  
"7231", "SKI", 375.19867748376, -0.170682728218706, 0.190444966715555, -0.896231237623804, 0.370129275364357, 0.788703635963305  
"7232", "SLC25A51", 28.3473101211276, -0.315003666496817, 0.351438632391725, -0.896326235829713, 0.370078550872574, 0.788703635963305  
"7233", "RAB11FIP3", 47.4080585307184, -0.251200217342886, 0.280251207821215, -0.896339463782574, 0.370071488121896, 0.788703635963305  
"7234", "FTO", 133.291836769363, 0.190741761925975, 0.21284203150556, 0.896165858673415, 0.370164187101329, 0.788703635963305  
"7235", "ZNF829", 30.5976668299419, 0.31991134128127, 0.356987015192012, 0.896142794183144, 0.370176503807623, 0.788703635963305  
"7236", "IFI44", 107.462981644866, -0.18820898411837, 0.210357572179637, -0.894709813239557, 0.370942231510433, 0.788805616806641  
"7237", "BHLHE40-AS1", 7.50317243728911, -0.58590166511027, 0.654608033260802, -0.895041972203909, 0.370764651569787, 0.788805616806641  
"7238", "VPS8", 72.1654139122654, 0.213350615249877, 0.23831981700704, 0.895228176696586, 0.370665125388397, 0.788805616806641  
"7239", "ETV1", 43.7666816581439, 0.400163042972142, 0.447187417327106, 0.8

94844146921589,0.370870407229445,0.788805616806641  
"7240","TRIM73",33.2535364946381,0.340669694710046,0.380792708525041,0  
.894632925167063,0.370983345193122,0.788805616806641  
"7241","PLAC9",9745.68467668227,-0.216901317241772,0.242154375645325,-  
0.895715044024064,0.370404973511936,0.788805616806641  
"7242","ITPRIP",41.7249640658852,-0.312451258142111,0.349132602439721,  
-0.894935780728346,0.370821418272874,0.788805616806641  
"7243","TMEM19",84.3773042653277,-0.187130055374353,0.209131279002743,  
-0.894797068457168,0.370895577721364,0.788805616806641  
"7244","TSP0AP1",4.01469355438325,0.786558017016087,0.878338449350315,  
0.895506757785548,0.370516254951559,0.788805616806641  
"7245","AP000894.4",2.43319078166773,0.946596449822736,1.0568784092334  
9,0.895653124855926,0.370438053001924,0.788805616806641  
"7246","AC006504.7",3.25927808948901,0.852854025100987,0.9533176342114  
24,0.894616856433648,0.37099193784289,0.788805616806641  
"7247","APLP1",2.67475892333242,-0.973517646712339,1.08819475851667,-0  
.894617106995948,0.370991803855396,0.788805616806641  
"7248","F0SB",9694.21930788645,0.285812105269869,0.319055335120702,0.8  
95807321829435,0.37035567872915,0.788805616806641  
"7249","DDRKG1",283.688338367091,-0.190890998821526,0.213350727264039,  
-0.894728606128828,0.37093218298417,0.788805616806641  
"7250","HSPA13",93.2788072863007,-0.173274146762814,0.193607582779497,  
-0.894976034901272,0.370799898992765,0.788805616806641  
"7251","RPS24",15077.6497799792,-0.229025894739041,0.256135855532777,-  
0.894157884543942,0.371237422200087,0.78904043907463  
"7252","CRYAB",1401.62939049329,-0.255815764343798,0.286107936678237,-  
0.894123271496288,0.371255939319383,0.78904043907463  
"7253","CBARP",2.52698961284888,-0.825379249766901,0.922967911902722,-  
0.894266462704387,0.371179339304297,0.78904043907463  
"7254","TAS2R14",13.5855337486719,0.355539874081677,0.397766109728231,  
0.893841545034078,0.371406677281868,0.789251989288668  
"7255","AP002813.1",3.769058337544,0.74529032649876,0.833937736949365,  
0.893700205035825,0.371482315658483,0.789303913973192  
"7256","GPBP1L1",154.329982884786,0.159423573267015,0.178414077287121,  
0.893559385510007,0.371557685005452,0.789355252805822  
"7257","WDR830S",1183.72358681047,-0.222955845327957,0.249635741410052  
, -0.893124694679554,0.371790399810055,0.789740803785587  
"7258","TIGD2",5.31573758149533,-0.613921809956981,0.687748385710241,-  
0.892654672424976,0.372042131222565,0.789842784502372  
"7259","MARCH6",341.347816957893,0.181283365776677,0.203056664704697,0  
.892772300974782,0.371979122590177,0.789842784502372  
"7260","HOXC5",55.4945225753067,-0.266538152910357,0.298584515354328,-  
0.892672389906282,0.372032640294953,0.789842784502372  
"7261","LINC00632",335.371523233754,0.187059226683017,0.20955439406314  
3,0.892652370852468,0.372043364143478,0.789842784502372  
"7262","AC006449.6",11.0078393213003,-0.398748549626372,0.446806009574  
324,-0.892442225668054,0.372155946718587,0.789972998990225  
"7263","TRDC",6.30000587656594,-0.713575405704615,0.79970221293668,-0.  
892301401898354,0.372231403055395,0.790007671399886  
"7264","AC090527.3",2.59342732633539,0.861326658563786,0.9653742547710

09,0.892220456788644,0.372274779438779,0.790007671399886  
"7265","VAMP5",843.214495775554,-0.221557363215362,0.248499488959338,-  
0.891580759957276,0.372617686571147,0.790626515966172  
"7266","TIAF1",3.11699972006305,0.737122848291758,0.827069483534029,0.  
891246579600624,0.372796900516628,0.790897911018968  
"7267","SHISA4",125.899893954305,-0.260643442597635,0.292616918001871,  
-0.890732649285744,0.373072614787956,0.791254226838199  
"7268","RAD50",368.093005341993,0.147009301372915,0.165071694326633,0.  
890578496650203,0.37315533948766,0.791254226838199  
"7269","NAPEPLD",41.3055357292524,0.311968527315689,0.350278690403657,  
0.890629478362444,0.373127979328748,0.791254226838199  
"7270","AC137932.3",12.3606852067692,0.415048472017362,0.4660581360549  
84,0.890550856016805,0.373170173799138,0.791254226838199  
"7271","SLC35F5",194.217114299211,0.165175373427129,0.18555277950112,0.  
.890180000920614,0.373369241457372,0.79141871265346  
"7272","AC004816.2",6.01208760675709,-0.743822525521893,0.835636660596  
343,-0.890126726837322,0.37339784332772,0.79141871265346  
"7273","CDK10",77.7143763869443,0.207832259734215,0.233488065771032,0.  
890119411662023,0.373401770815999,0.79141871265346  
"7274","UBXN2A",212.229497535049,0.135596110870005,0.152776104032282,0.  
.887547903704583,0.37478398740528,0.791420036013944  
"7275","MRPS5",216.1994456762,-0.164631321787944,0.185131881443819,-0.  
889265103903265,0.373860621103741,0.791420036013944  
"7276","AC009237.14",4.58659730261823,0.63470069548431,0.7138171337285  
59,0.889164276807155,0.373914798533393,0.791420036013944  
"7277","RIF1",348.111377347799,0.215209514563927,0.242635300317058,0.8  
86967041822469,0.37509664502873,0.791420036013944  
"7278","AC092944.1",65.810367045549,0.252590423622681,0.28441506087281  
3,0.888104950727755,0.374484299858624,0.791420036013944  
"7279","TPRG1",43.5489402410236,-0.328680604008751,0.370095686092567,-  
0.888096285257816,0.374488960688184,0.791420036013944  
"7280","ZSCAN9",23.4746725780208,0.304446504769754,0.343178283333943,0.  
.887138025786731,0.375004593609638,0.791420036013944  
"7281","EIF3B",305.481817375743,-0.155095499018962,0.174462721941574,-  
0.888989334185109,0.37400881198838,0.791420036013944  
"7282","PIP4P2",370.799510360386,-0.178299483898635,0.20036919258844,-  
0.889854780544348,0.373543867397611,0.791420036013944  
"7283","SIGMAR1",160.442054708176,-0.170705590495385,0.192290480800097  
, -0.887748523926404,0.374676037999929,0.791420036013944  
"7284","PDCD4-  
AS1",4.34914361142257,0.692635063721168,0.779890674201095,0.8881181512  
14835,0.37447719988327,0.791420036013944  
"7285","OTUB1",186.870469077348,-0.161610327496702,0.181858215311761,-  
0.888661132078371,0.374185225916242,0.791420036013944  
"7286","STIP1",134.258439027783,-0.221143495387983,0.248871895228153,-  
0.888583643344903,0.374226884870118,0.791420036013944  
"7287","AP002495.1",19.9922994880897,0.324958521318332,0.3663162850417  
71,0.887098211539455,0.375026026875382,0.791420036013944  
"7288","INTS4",40.4897911890165,0.23531123095849,0.264719262627055,0.8  
88908606888967,0.37405219944023,0.791420036013944



"7289", "CLEC2D", 44.1023151261826, 0.303048641116419, 0.341380185227104, 0.887715966627693, 0.374693555071994, 0.791420036013944  
"7290", "NELL2", 3.36287097422906, 0.804759885642794, 0.907160073707318, 0.887120045257236, 0.375014273002343, 0.791420036013944  
"7291", "GTF2H3", 98.7390816865237, -0.171124209324263, 0.192698550512544, -0.888040978352476, 0.374518709032321, 0.791420036013944  
"7292", "DCAF4", 23.768638385743, 0.304944466671332, 0.343119611213377, 0.88741000821707, 0.374142290440118, 0.791420036013944  
"7293", "SLX1A", 3.30358994329222, 0.865118912927985, 0.974497106414319, 0.887759345034083, 0.374670215942178, 0.791420036013944  
"7294", "MT1G", 180.975946708252, -0.675362482568221, 0.760700363295697, -0.887816695186323, 0.374639360894372, 0.791420036013944  
"7295", "NPIP15", 43.576124093225, 0.316070563221322, 0.355737708661432, 0.888493278968456, 0.3742754695607, 0.791420036013944  
"7296", "MEAK7", 51.6877744873682, 0.217229633919077, 0.244408472630094, 0.888797477360156, 0.374111931878606, 0.791420036013944  
"7297", "TOM1L2", 73.8123246186047, 0.199334773076644, 0.224211841759131, 0.889046588764869, 0.373978041999915, 0.791420036013944  
"7298", "COPRS", 568.689874816869, -0.23080924069446, 0.26021332730653, -0.887000074452634, 0.375078860398805, 0.791420036013944  
"7299", "MIF4GD", 96.5698780671381, -0.255093258372662, 0.286873968239177, -0.889217170656563, 0.373886376472388, 0.791420036013944  
"7300", "FAAP100", 60.3577787920865, 0.202504006858694, 0.228212565821214, 0.887348188431216, 0.374891468970746, 0.791420036013944  
"7301", "SLC39A3", 143.330492361064, -0.26953804329342, 0.303546256387948, -0.887963655031661, 0.37456030196197, 0.791420036013944  
"7302", "ZNF628", 22.0866150468621, 0.318874571514705, 0.359486129493485, 0.887028859678113, 0.375063362978683, 0.791420036013944  
"7303", "NRSN2", 58.8766469048506, 0.268940127697878, 0.302822609175521, 0.888111123638048, 0.374480979704795, 0.791420036013944  
"7304", "CEBPB", 2034.76686442172, -0.284753882002324, 0.320765999451806, -0.887730876991242, 0.374685532663226, 0.791420036013944  
"7305", "TTC28-  
AS1", 63.6342879322605, -0.202307780136072, 0.227585691034491, -0.8889301397486, 0.374040626149215, 0.791420036013944  
"7306", "TCEAL7", 131.083528922701, -0.260904660925138, 0.293508579843797, -0.888916641087593, 0.374047881264279, 0.791420036013944  
"7307", "STK10", 37.24442872771, -0.254647563845687, 0.287252824095356, -0.88649281220349, 0.375352025709127, 0.791534816180296  
"7308", "SVIP", 7.53457123164886, -0.558321604073226, 0.629634243826376, -0.886739578648434, 0.375219124398146, 0.791534816180296  
"7309", "TMEM116", 36.9549857960264, 0.299249824452245, 0.337567168553848, 0.8864897191698, 0.375353691712638, 0.791534816180296  
"7310", "MED4", 385.553417924866, -0.169844513317248, 0.191607979988201, -0.886416700012739, 0.375393023413567, 0.791534816180296  
"7311", "WDR90", 43.1534766564985, 0.280501555842086, 0.316454134009416, 0.886389292148544, 0.375407787291219, 0.791534816180296  
"7312", "ENY2", 781.40865543342, -0.189826606744264, 0.214250011426635, -0.886005118414036, 0.37561476907464, 0.791754637670666  
"7313", "SLFN5", 574.504644025181, 0.228913775929797, 0.258356541745077, 0.

886038241507616,0.375596920526486,0.791754637670666  
"7314","USP37",47.8935358172971,0.268811995351324,0.303567795861134,0.  
885508934137041,0.375882203199626,0.791810596295166  
"7315","SMPD2",25.6475263464318,-0.320884447383111,0.362336198506322,-  
0.885598647625907,0.375833840588185,0.791810596295166  
"7316","IKZF1",11.6668494554057,0.550300333603389,0.621471667484648,0.  
885479358746443,0.375898147498412,0.791810596295166  
"7317","REX01",65.2411500265671,-0.237245835590733,0.26787804161815,-0.  
885648686087224,0.375806867599565,0.791810596295166  
"7318","CHMP2A",839.503368641449,-0.22901967433131,0.258624993027492,-  
0.885528005821794,0.375871921743172,0.791810596295166  
"7319","DCP2",151.788786418738,0.171633602836676,0.194011577775858,0.8  
84656497330095,0.376341925224748,0.792420921656363  
"7320","DMRT3",14.9539344105796,0.511502628722793,0.578222499160529,0.  
884612116383225,0.376365869516894,0.792420921656363  
"7321","BRD3",220.178263808259,0.163593076542699,0.184940424911265,0.8  
8457175666808,0.376387645100801,0.792420921656363  
"7322","ALG10",15.5371198936918,-0.357716786380732,0.404400413028429,-  
0.884560882868298,0.376393512057599,0.792420921656363  
"7323","SMIM4",115.145582768,-0.225292095877987,0.254804165363799,-0.8  
84177444887231,0.376600432033058,0.792748280730518  
"7324","ZNF667-  
AS1",149.197446107898,-0.185305757572565,0.209608464413214,-0.88405665  
3395734,0.376665630960422,0.792777266692368  
"7325","FARP2",69.224878728807,0.226151448225985,0.25591157152844,0.88  
3709348800791,0.37685313235002,0.792777971500271  
"7326","AC117453.1",2.65927441662064,1.12912196042491,1.27789478199565  
,0.883579756591218,0.376923110809308,0.792777971500271  
"7327","DIMIT1",128.217973493318,-0.199168292655198,0.225404741022884,-  
0.883602943537813,0.376910589508184,0.792777971500271  
"7328","OR2A1-  
AS1",17.3043564080611,-0.45699997227477,0.517049832677471,-0.883860594  
071288,0.376771471594632,0.792777971500271  
"7329","CSTB",1597.93094699634,-0.201015709114315,0.227447840558325,-0.  
.883788162687646,0.376810577581128,0.792777971500271  
"7330","ZSCAN31",16.2207387729828,0.367271013103103,0.415767147674642,  
0.883357463804499,0.377043165287698,0.79292229098361  
"7331","AC002070.1",2.92589802888264,-0.84346690491357,0.9550940235148  
3,-0.883124471671949,0.377169023507085,0.793078774704912  
"7332","FPGT",47.3224933680341,0.278408861383538,0.315675192472358,0.8  
81947229375385,0.377805344929206,0.793471440366053  
"7333","OLFML3",1596.45388768395,0.207806193441615,0.23568499183424,0.  
881711609315231,0.377932781362459,0.793471440366053  
"7334","NCK2",126.824901683427,-0.173899013076545,0.197225509964822,-0.  
.881726776153664,0.377924577495344,0.793471440366053  
"7335","ROPN1L",5.20125939772114,0.621388255240444,0.704258244692953,0.  
.882330111039539,0.377598317705558,0.793471440366053  
"7336","PRKAR2B",55.2064554667869,-0.303639299898183,0.344113368015505  
, -0.882381587350892,0.377570489378714,0.793471440366053  
"7337","GIMAP4",6.86102950763216,-0.641202073029335,0.7266837679906,-0

.882367408318978,0.377578154501397,0.793471440366053  
"7338","PCGF5",124.140989812605,-0.169292812280888,0.19195925001484,-0  
.881920575683643,0.377819759399896,0.793471440366053  
"7339","C12orf60",5.37675941458908,0.607633375358201,0.689008460593263  
,0.881895375907293,0.377833387896349,0.793471440366053  
"7340","LRR49",43.7387224834283,-0.253939004555781,0.288031436572966,  
-0.881636419889365,0.377973453558737,0.793471440366053  
"7341","ZNF606",16.6908846306021,0.383934913360017,0.435307945247788,0  
.881984621579724,0.377785123579892,0.793471440366053  
"7342","SDCBP2",16.6426522843574,-0.410714944411387,0.465512287474139,  
-0.882285936295944,0.377622199779588,0.793471440366053  
"7343","LAMA5",7.5609093623213,-0.496524454242127,0.562845332632867,-0  
.882168555825975,0.377685663393305,0.793471440366053  
"7344","LDB2",177.498401387804,0.195345601099729,0.221600404565518,0.8  
81521861310379,0.378035426884057,0.793472921471208  
"7345","AC009812.1",15.7826077704724,-0.326149201699997,0.370016584026  
322,-0.881444821069955,0.378077107246579,0.793472921471208  
"7346","PHF10",202.240207389464,0.173191667958469,0.196562993130504,0.  
881100074842076,0.378263656753681,0.793756366574733  
"7347","AP001160.2",4.52678144716563,0.8034152019765,0.912025793686754  
,0.880912807003836,0.378365015113558,0.793860991966176  
"7348","RBM15B",144.980014205881,-0.170522851079566,0.193623040462827,  
-0.880695038524118,0.378482902916608,0.793892223222141  
"7349","XPOT",109.899849169336,-0.174191998289111,0.197788608707977,-0  
.880697828995273,0.378481392166938,0.793892223222141  
"7350","PRKAR1A",610.288645500352,0.137291010489477,0.155922624288724,  
0.880507310056903,0.378584546867427,0.793997386389305  
"7351","SCLT1",74.1487775156914,-0.194452501177598,0.220932090622787,-  
0.880146024189849,0.378780209251977,0.794299676998943  
"7352","NBP3",9.91888321832203,0.501546945697054,0.570146481416097,0.  
87968085754268,0.379032222217331,0.794456144298492  
"7353","GAS5",1551.30835916316,-0.194831347904232,0.221510239462922,-0  
.879559104701544,0.37909820118959,0.794456144298492  
"7354","LMCD1",364.871189510598,-0.357158885320738,0.405976774382966,-  
0.87975201503479,0.378993664596694,0.794456144298492  
"7355","PC",9.05323251941419,0.434101026675604,0.493558714756583,0.879  
532695293805,0.379112513620481,0.794456144298492  
"7356","AC008870.2",2.57447446371524,0.825697025186293,0.9387022643167  
82,0.879615461231748,0.379067660194776,0.794456144298492  
"7357","CCNA2",3.15260882212536,-0.671671437381834,0.763816471943477,-  
0.87936233644296,0.379204846636424,0.794541621707283  
"7358","PAK1IP1",120.344758096622,-0.211046517600366,0.240126771497593  
, -0.878896244196917,0.379457535276241,0.794929580077713  
"7359","SLC14A2-  
AS1",3.53337702564704,-0.798608231467905,0.908716933103231,-0.87883058  
2303216,0.379493141731553,0.794929580077713  
"7360","COL1A1",26082.8984474973,0.355401549146387,0.404484290166649,0  
.87865352941139,0.379589162389811,0.795022681825942  
"7361","DCLK2",10.2691055796916,0.452498525765199,0.515090966570087,0.  
878482744083669,0.379681798130525,0.795108669770688

"7362", "SMCR5", 11.068686253049, 0.440614635711694, 0.501735849416427, 0.878180493230005, 0.379845776207871, 0.795344015246446  
"7363", "ZFAND2B", 123.467165168241, -0.198077456561744, 0.225592510982623, -0.878032057442728, 0.37992632199344, 0.795404624952992  
"7364", "USP44", 34.1544392385742, 0.39064182531538, 0.444988770442205, 0.877868951450577, 0.380014840385566, 0.795481907189503  
"7365", "ZNF717", 30.2791606110079, 0.298437395503763, 0.340046833263537, 0.877636155701158, 0.380141201694084, 0.795629419440253  
"7366", "NOA1", 152.196017843991, -0.206724969753961, 0.235570867117763, -0.877548961309453, 0.380188537372488, 0.795629419440253  
"7367", "LINC02588", 4.04931980109044, 0.756257206124294, 0.861893629115301, 0.877436821177761, 0.380249420800837, 0.795648815209027  
"7368", "TRAF3IP1", 80.7116835376256, -0.251729963570302, 0.286957108121801, -0.877238989540742, 0.380356842703616, 0.795751158176712  
"7369", "RIPK3", 8.37920057166158, -0.476105756720271, 0.542799265042183, -0.877130437314191, 0.380415794113564, 0.795751158176712  
"7370", "TMEM229B", 4.74192002923523, 0.612089159875825, 0.697886193452487, 0.877061569090199, 0.380453197259966, 0.795751158176712  
"7371", "KPNA6", 219.247686298691, 0.19865046003198, 0.226636349352735, 0.876516324937806, 0.380749405551977, 0.796154650920201  
"7372", "DMPK", 34.3879709276077, 0.25839361802002, 0.29478439382654, 0.876551213128555, 0.380730448019946, 0.796154650920201  
"7373", "RTTN", 26.1912851161033, 0.316482863879464, 0.361164362687886, 0.87628486244908, 0.380875192233848, 0.796309655267159  
"7374", "SMOC1", 29.5568100610033, -0.599681206074603, 0.684503105642902, -0.876082520489615, 0.380985174468668, 0.796431579120492  
"7375", "LYPLAL1", 188.261775987344, 0.225197835746186, 0.257142567466229, 0.875770347808173, 0.381154893037581, 0.796431660449095  
"7376", "PPP2CA", 208.473829680184, -0.167756934253166, 0.191535096694535, -0.875854802322256, 0.381108973168154, 0.796431660449095  
"7377", "POLR3D", 92.1678711577241, -0.203990029388863, 0.232937568818966, -0.875728335378133, 0.381177737430951, 0.796431660449095  
"7378", "AC092868.2", 11.1978294992874, 0.650588351993244, 0.742940685976206, 0.87569353014822, 0.381196663522756, 0.796431660449095  
"7379", "HOXB4", 51.750083155208, -0.235767694303913, 0.26927602628908, -0.875561399033741, 0.381268517907708, 0.796431660449095  
"7380", "TMEM205", 250.281224830345, -0.189141230076245, 0.216034915381198, -0.875512320508475, 0.38129520947871, 0.796431660449095  
"7381", "CYHR1", 221.111104163445, -0.18360653634773, 0.20976579848799, -0.87529300615821, 0.381414498562815, 0.796466481402463  
"7382", "AC138331.1", 6.11233057497009, -0.552765276789857, 0.631521223911575, -0.875291685948555, 0.381415216718325, 0.796466481402463  
"7383", "ARL16", 243.541211270197, -0.222702759100029, 0.254480324345868, -0.875127614177944, 0.381504473431822, 0.796544962474811  
"7384", "OAS1", 90.0994386612445, -0.322392629675894, 0.368460148022322, -0.874972860447211, 0.381588672782336, 0.796612864428455  
"7385", "LINC01285", 2.58108470785919, 0.808427223371713, 0.924219062170907, 0.874713860015818, 0.381729616820838, 0.796799193404634  
"7386", "TMEM187", 73.709620615798, 0.263620939704197, 0.301432709401278, 0.874559832036195, 0.381813451613874, 0.796866281698872

"7387", "SDC3", 82.1750621509767, 0.269149215474216, 0.308122623197548, 0.87351331973328, 0.382383349368368, 0.797028160710837  
"7388", "CCDC30", 41.9425649784781, -0.266407284272218, 0.304814346463177, -0.87399850880838, 0.382119065811255, 0.797028160710837  
"7389", "DPH2", 23.3139888335489, -0.307820474649211, 0.353102203727445, -0.871760276202676, 0.383339169590215, 0.797028160710837  
"7390", "RETREG2", 268.992933970616, -0.145593011679652, 0.16705137655186, -0.871546315180791, 0.383455928682371, 0.797028160710837  
"7391", "COPS9", 885.484591185989, -0.202742575019344, 0.232032019559572, -0.873769815925305, 0.382243621369052, 0.797028160710837  
"7392", "AC116036.2", 2.71450438693107, 0.807531465840081, 0.923833252593625, 0.87410954690467, 0.382058598870755, 0.797028160710837  
"7393", "PPP4R2", 244.937346971641, 0.13158563474605, 0.150657934308512, 0.873406603840683, 0.382441492780906, 0.797028160710837  
"7394", "PPARGC1A", 8.32199771294102, 0.669455102295053, 0.768184640743581, 0.871476812719192, 0.383493861043936, 0.797028160710837  
"7395", "AC008467.1", 10.2774632231152, 0.476852849083281, 0.546102733635328, 0.873192569297245, 0.382558124349844, 0.797028160710837  
"7396", "CLK4", 139.419906135072, 0.167597423981217, 0.192248769066615, 0.871773716913341, 0.383331835685996, 0.797028160710837  
"7397", "RNF8", 139.873289144432, -0.173211832864247, 0.198716667822238, -0.871652261294932, 0.383398110887658, 0.797028160710837  
"7398", "MAP3K7", 112.991014157261, 0.182339961839955, 0.209181565631459, 0.871682747423385, 0.383381474733247, 0.797028160710837  
"7399", "AL360178.1", 8.3290141322269, 0.540028123936855, 0.619358314688395, 0.871915515025495, 0.383254468987924, 0.797028160710837  
"7400", "MYO1G", 6.32545044712243, 0.681187223681771, 0.780640931418379, 0.872599932012396, 0.382881177629535, 0.797028160710837  
"7401", "HIPK2", 80.0657718016353, 0.265481656582639, 0.304357191284833, 0.872270030689658, 0.383061082971693, 0.797028160710837  
"7402", "GIMAP7", 4.4557007914997, -0.685970332627437, 0.78665408487074, -0.872010132306316, 0.383202850020214, 0.797028160710837  
"7403", "TMEFF1", 10.6235946028363, -0.469105418857067, 0.537932046073333, -0.872053305396711, 0.383179298122921, 0.797028160710837  
"7404", "FNBP1", 258.521521004489, 0.184762270573378, 0.211589926239273, 0.873209201672687, 0.382549060265057, 0.797028160710837  
"7405", "ZNF32", 238.786594622719, -0.226214919966927, 0.259530747148054, -0.871630519515589, 0.383409975556933, 0.797028160710837  
"7406", "PKP3", 5.32161090380084, -0.657059180498944, 0.753359890042407, -0.872171705958433, 0.38311471248889, 0.797028160710837  
"7407", "LINC01068", 3.12614810958466, 0.91124347810656, 1.04388924769653, 0.872931185101607, 0.382700587228467, 0.797028160710837  
"7408", "AL160153.1", 3.15289410877102, -0.745642858685103, 0.854137011091899, -0.872978045678994, 0.382675044299602, 0.797028160710837  
"7409", "CHD8", 180.427445922426, 0.231970249202, 0.265794331276742, 0.872743403095663, 0.382802954589635, 0.797028160710837  
"7410", "MRPL52", 249.309470452215, -0.246211378838513, 0.281729686068142, -0.873927708061841, 0.382157624151865, 0.797028160710837  
"7411", "MTA1", 143.965787511172, -0.168725219118686, 0.193408187214843, -0.872378887100894, 0.383001714497255, 0.797028160710837

"7412", "MY01E", 170.082437094146, -0.2961306515726, 0.339212531198218, -0.87299443368605, 0.382666111713498, 0.797028160710837  
"7413", "FANCI", 14.8129065493274, 0.361250321998589, 0.413340508897478, 0.873977542056471, 0.38213048413092, 0.797028160710837  
"7414", "NOB1", 206.819245413521, -0.205658763338211, 0.235533625123118, -0.873160947744552, 0.382575357394764, 0.797028160710837  
"7415", "RPL26", 15410.6345428062, -0.239244018636095, 0.274342077368705, -0.872064617031241, 0.383173127517035, 0.797028160710837  
"7416", "AC068234.2", 3.97247609828815, -0.693535784083464, 0.795257013843753, -0.872090119307927, 0.383159216002107, 0.797028160710837  
"7417", "AL022322.1", 7.8587353990937, 0.514175406176424, 0.589025768988018, 0.872925147332363, 0.382703878393018, 0.797028160710837  
"7418", "JHY", 39.1351947502678, 0.282120257930372, 0.323989461757271, 0.870769858995393, 0.38387982574553, 0.797516083751568  
"7419", "AC124068.2", 3.32133670867909, -0.708835102448572, 0.813997118268358, -0.870807877006371, 0.383859063586725, 0.797516083751568  
"7420", "MLLT1", 139.418383186982, 0.175271949248946, 0.201285593120054, 0.870762514753888, 0.383883836616064, 0.797516083751568  
"7421", "MAPRE3", 47.1237925244117, -0.219964196577997, 0.252732632354474, -0.870343471394242, 0.384112728961767, 0.797630482812001  
"7422", "ZNF354A", 55.8983128534383, -0.214912134230946, 0.246921686150667, -0.870365570482173, 0.384100655781461, 0.797630482812001  
"7423", "FAM135A", 43.2943933890816, 0.243128122897458, 0.279549931912437, 0.86971268865704, 0.384457436279132, 0.797630482812001  
"7424", "EZR", 30.4277862633789, -0.406882752659712, 0.467634227910383, -0.870087620570166, 0.384252522366835, 0.797630482812001  
"7425", "MROH1", 42.7806507677884, 0.34904884056925, 0.401317796346036, 0.869756695933523, 0.384433381241857, 0.797630482812001  
"7426", "CCDC59", 367.315331020641, -0.194053838205929, 0.223147846181621, -0.869620036789368, 0.384508084189165, 0.797630482812001  
"7427", "SLC25A39", 141.241774862664, -0.238357493468138, 0.27391392030399, -0.870191238194861, 0.38419590335812, 0.797630482812001  
"7428", "EID2", 90.8200529279749, -0.218287511830342, 0.250860231221592, -0.870155906208675, 0.384215208979223, 0.797630482812001  
"7429", "THBD", 35.3889621707276, -0.554151922958588, 0.637214947868161, -0.869646772745263, 0.384493468627329, 0.797630482812001  
"7430", "DSN1", 51.8612383753075, -0.239607829833338, 0.275456388255355, -0.869857589257342, 0.384378234913194, 0.797630482812001  
"7431", "LINC00899", 43.1385966739427, 0.31287055471363, 0.359458682852419, 0.870393649225281, 0.384085316129126, 0.797630482812001  
"7432", "PPP1R12B", 292.120911988014, 0.259819128051429, 0.298866999896239, 0.869346994287203, 0.384657365918771, 0.797725453469374  
"7433", "TAF9", 285.745704318028, -0.230832700123768, 0.265505634756357, -0.869407914207144, 0.384624055831166, 0.797725453469374  
"7434", "INTS7", 24.2134950777854, 0.344571827911028, 0.39641426559851, 0.869221563938396, 0.384725954885241, 0.797760370534838  
"7435", "RASA2", 127.068329970652, 0.178588694063229, 0.205607679910633, 0.868589607843698, 0.385071640628547, 0.798043865711091  
"7436", "ETFDH", 103.576536647958, 0.178815659465994, 0.205916739684973, 0.868388163777066, 0.385181872264424, 0.798043865711091

"7437", "MAP1B", 1711.95300327223, -0.251869693089657, 0.289990168022387, -0.868545629692566, 0.385095704142237, 0.798043865711091  
"7438", "ZNF510", 38.659300842221, 0.258802620277854, 0.297906301568368, 0.868738321127659, 0.384990276028547, 0.798043865711091  
"7439", "GAPVD1", 132.972206441016, 0.191639451248747, 0.220651307621851, 0.868517179046935, 0.385111271964382, 0.798043865711091  
"7440", "CCNJ", 18.1440906152913, -0.304351489796859, 0.350488045642093, -0.868364823226107, 0.38519464562775, 0.798043865711091  
"7441", "ZNF17", 19.6686923269182, 0.329500242759933, 0.379473381955322, 0.868309237032933, 0.385225066802221, 0.798043865711091  
"7442", "AC026329.1", 7.14534947646677, 0.551041062169739, 0.63506365305211, 0.867694221707448, 0.385561749968716, 0.79823972392198  
"7443", "CDC5L", 348.57544914699, -0.163382070905632, 0.188305269787282, -0.867644708457687, 0.385588863252999, 0.79823972392198  
"7444", "TRMT11", 138.984948712805, 0.193745784191985, 0.223309274201561, 0.867611902303297, 0.385606828431217, 0.79823972392198  
"7445", "BSG", 1078.36694591421, -0.205239819195027, 0.236568864685397, -0.867569024638835, 0.385630309701394, 0.79823972392198  
"7446", "ZNF808", 27.9285106359976, 0.276391172689825, 0.318472673732487, 0.867864641102584, 0.385468437801831, 0.79823972392198  
"7447", "DEPDC5", 30.1705353311675, 0.290952163580757, 0.335272410758022, 0.867808248590867, 0.385499313672011, 0.79823972392198  
"7448", "PPT2", 23.4068097327399, 0.304604335776641, 0.351226998301822, 0.867257748548372, 0.385800801283515, 0.798378218792507  
"7449", "AC005736.1", 17.5499901778082, 0.427462938602292, 0.492869052465435, 0.867295149622465, 0.385780313601037, 0.798378218792507  
"7450", "NDUFB6", 450.98582206124, -0.22877294375598, 0.263855230471323, -0.867039638923678, 0.385920291323477, 0.798518294060591  
"7451", "AQR", 115.397664666396, 0.187646678648857, 0.216487263470641, 0.866779299809962, 0.386062946119402, 0.798599076010544  
"7452", "PEAK1", 187.318448728471, 0.281853776616732, 0.325143957193251, 0.866858418805582, 0.386019588858992, 0.798599076010544  
"7453", "KIAA1614", 37.4162531535171, 0.260158651815568, 0.300371190974092, 0.866123848202231, 0.386422248368351, 0.798763410961996  
"7454", "HSD17B11", 465.995029771932, -0.21081690043532, 0.243307343479607, -0.866463368595324, 0.38623610627005, 0.798763410961996  
"7455", "LTC4S", 43.2087434751518, -0.336375111704469, 0.388393763481219, -0.866067232103572, 0.386453293477429, 0.798763410961996  
"7456", "ZNF438", 93.7501278535768, 0.192738506117942, 0.222489583266372, 0.866281033423436, 0.386336064744961, 0.798763410961996  
"7457", "DEGS2", 3.10729459762887, 0.93850419936259, 1.08360130745253, 0.866097330178523, 0.386436789183204, 0.798763410961996  
"7458", "THBS1", 573.388866902692, -0.664868657038626, 0.767419075998939, -0.866369729177211, 0.386287438625182, 0.798763410961996  
"7459", "GATA2", 2.94616873889161, -1.05799249864329, 1.22236299098061, -0.865530539168678, 0.386747661541893, 0.798914711361424  
"7460", "AIP", 464.149520134673, -0.206191272170651, 0.23814313107663, -0.865829181125124, 0.386583844006059, 0.798914711361424  
"7461", "AC004825.2", 7.9262403304717, -0.44273970303333, 0.511442209048479, -0.865669073065033, 0.386671664670794, 0.798914711361424

"7462", "LITAF", 425.345307435054, -0.150372362918867, 0.173748216426381, -0.865461332563267, 0.386785630288051, 0.798914711361424  
"7463", "RPS9", 13041.0413339318, -0.236223019135404, 0.272902648950833, -0.865594452980052, 0.386712598595713, 0.798914711361424  
"7464", "CYTH1", 90.6994730865705, 0.269509070564817, 0.311450880759942, 0.86533410953025, 0.386855434458119, 0.798951838447469  
"7465", "AC105345.1", 5.11426009151409, 0.621545163690452, 0.718591560501214, 0.864949155897305, 0.38706669591882, 0.79908979175807  
"7466", "RBM4B", 54.4408887732801, 0.26791709202314, 0.309883525090501, 0.864573526278607, 0.387272908206029, 0.79908979175807  
"7467", "SAP18", 1430.04113153898, -0.228444463699005, 0.264166949554034, -0.864773069018153, 0.38716335534983, 0.79908979175807  
"7468", "TP53I13", 362.628604304945, -0.215385786258136, 0.249082427433067, -0.864716907080945, 0.387194187437456, 0.79908979175807  
"7469", "SHC2", 166.921693614986, 0.238787824362814, 0.276089878910764, 0.864891626251872, 0.387098274067803, 0.79908979175807  
"7470", "GDF15", 97.1707485278692, 0.439363102869157, 0.508197827928806, 0.864551319827183, 0.387285101149824, 0.79908979175807  
"7471", "MIR503HG", 13.2873921895292, 0.578764997711407, 0.669104118609599, 0.864984957668595, 0.387047045040957, 0.79908979175807  
"7472", "DUSP16", 68.1689620279524, 0.224423708345292, 0.259640679218, 0.86436266081734, 0.387388697998147, 0.799196571151155  
"7473", "SIVA1", 627.397548095592, -0.226264304499296, 0.261860551987335, -0.864064108862949, 0.387552674023193, 0.799356982937254  
"7474", "MRPS34", 384.609406882478, -0.21998156563231, 0.254598785040999, -0.864032267855816, 0.387570164805257, 0.799356982937254  
"7475", "CXCL10", 11.7564672764413, -0.722839672317927, 0.836702389968797, -0.863914912857944, 0.387634633965626, 0.799374625239971  
"7476", "SPCS3", 244.516658786879, -0.146814084845634, 0.169994432843168, -0.86364054628236, 0.387785383197894, 0.799374625239971  
"7477", "LOXL2", 120.537880113585, -0.341682711985126, 0.395631256216408, -0.863639327319042, 0.387786053030415, 0.799374625239971  
"7478", "AC105020.1", 5.17509970835033, -0.677039557672, 0.783938004593706, -0.863639157311796, 0.387786146451152, 0.799374625239971  
"7479", "RPIA", 127.970439480366, 0.173890994091817, 0.201423419617656, 0.863310703501605, 0.387966660821421, 0.799532897936123  
"7480", "AC079915.1", 4.47558724400326, 0.734583927178827, 0.850849841251379, 0.863353192965805, 0.387943306226136, 0.799532897936123  
"7481", "DDIAS", 2.6839130818441, -0.829891571734157, 0.9617660637507, -0.862882984764239, 0.388201806772107, 0.799910553588026  
"7482", "AC020659.1", 3.09938748119332, 0.800590895536195, 0.927981754202931, 0.862722668748853, 0.388289965705924, 0.799985274172256  
"7483", "TBC1D7", 38.872908171917, -0.279537351446994, 0.324133661063601, -0.862413828078607, 0.38845983379146, 0.800121370643419  
"7484", "COA8", 304.463931116015, -0.198699063807323, 0.230392623372433, -0.862436743411366, 0.388447228380035, 0.800121370643419  
"7485", "TMEM42", 137.657443362208, 0.247394693619133, 0.287140214782557, 0.861581488355706, 0.388917861342231, 0.800850765774845  
"7486", "AC106791.1", 17.7596292677275, 0.409287554734093, 0.474995568425337, 0.861666048992681, 0.388871313541269, 0.800850765774845



"7487", "TNP02", 124.120007692264, 0.153556964568126, 0.178252487723314, 0.861457624122919, 0.388986050579643, 0.800884195229758  
"7488", "CYP4Z1", 4.42750767237682, 0.870051413021102, 1.01022434480528, 0.861245739617181, 0.389102713252073, 0.801017404484602  
"7489", "NDUFAF3", 534.978807484447, -0.21477571658059, 0.249463543835465, -0.860950314737158, 0.389265408422784, 0.801245329261212  
"7490", "HSPA9", 358.714031318039, -0.147711941546554, 0.171695064801072, -0.860315593332254, 0.389615099550426, 0.801430045312225  
"7491", "IGF2", 188.783973393976, 0.740705249501894, 0.860781764549043, 0.86050295209256, 0.389511856918079, 0.801430045312225  
"7492", "CCDC84-  
DT", 3.06252808683679, 0.784433779149674, 0.911772256762556, 0.86033960052149, 0.389601869640135, 0.801430045312225  
"7493", "ZNF609", 114.244259459995, 0.231889338020687, 0.269490443643358, 0.860473324714877, 0.389528181753354, 0.801430045312225  
"7494", "CFAP53", 5.40158651990181, 0.643520375761219, 0.747991871555565, 0.860330707101026, 0.389606770604959, 0.801430045312225  
"7495", "PGAM1", 596.394951265972, -0.200499401686866, 0.233146036665453, -0.85997345077998, 0.389803677569661, 0.801497090801163  
"7496", "NDUFB10", 1091.87953628138, -0.208662642931136, 0.242611974325836, -0.86006737099833, 0.389751906226538, 0.801497090801163  
"7497", "ARAF", 83.0351757106766, -0.170908353574531, 0.198725356576503, -0.860022880415548, 0.389776430107651, 0.801497090801163  
"7498", "AC091057.6", 3.06705827500665, -0.706147587784766, 0.821266658503064, -0.859827414730159, 0.389884184862759, 0.801555709477117  
"7499", "ZSCAN16-  
AS1", 203.042397409586, 0.231112572408143, 0.2688521396987, 0.859627052502345, 0.389994657742242, 0.801569019879555  
"7500", "WDR4", 14.0407161620588, -0.37821883830212, 0.439977995696051, -0.859631258840053, 0.389992338315942, 0.801569019879555  
"7501", "MED25", 91.1089624908443, -0.183851829100634, 0.213916412746104, -0.859456395797204, 0.390088767018985, 0.801655558405234  
"7502", "AC100786.1", 3.44304113167213, 0.835246024183862, 0.972000426142078, 0.859306232507529, 0.390171586542545, 0.801718875840221  
"7503", "CPSF4", 73.4500931054224, 0.240001490667056, 0.279359863713086, 0.859112284338554, 0.390278570546251, 0.801831822600353  
"7504", "UBE2J2", 189.504378359028, -0.205133033167268, 0.23886863750173, -0.858769218565926, 0.390467853162933, 0.801917647096677  
"7505", "GSC", 170.526835952121, -0.281427343444167, 0.327706457089365, -0.858778755669811, 0.390462590421214, 0.801917647096677  
"7506", "LIPE", 8.90991323123438, 0.490312052323494, 0.570957709235406, 0.858753712214678, 0.390476409932382, 0.801917647096677  
"7507", "IRAK3", 147.498362296684, 0.222366585970491, 0.258969608497478, 0.858659003504871, 0.390528674899995, 0.801918146207995  
"7508", "FBXL2", 34.5430402429078, 0.253243887477118, 0.295026185795657, 0.858377661610425, 0.390683958390716, 0.802004472189746  
"7509", "SLC25A25-  
AS1", 2.90129564655644, -0.71269857446797, 0.830360627607293, -0.858300057556475, 0.390726797674018, 0.802004472189746  
"7510", "ARHGAP6", 233.816423007799, 0.20689295733918, 0.241017202062973, 0.

.858415729534204,0.39066294503471,0.802004472189746  
"7511","MECR",93.5802379766971,-0.214974176534885,0.250655028633499,-0  
.857649566046466,0.391085996655262,0.802053324886362  
"7512","CEBPD",7074.1138439165,-0.231681903600108,0.27002064668444,-0.  
858015512683604,0.39088389762306,0.802053324886362  
"7513","MACROD1",104.959782387569,-0.208958668981085,0.243508578026814  
, -0.858116254771425,0.390828272565138,0.802053324886362  
"7514","CLEC2B",973.138933747222,-0.226991703715335,0.264578131790851,  
-0.857938266397511,0.390926552657764,0.802053324886362  
"7515","AC092828.1",12.6002142708136,0.372990450822683,0.4349248869608  
49,0.857597396711535,0.391114813050327,0.802053324886362  
"7516","AC068338.3",5.62218335472394,-0.554845734115928,0.646860214631  
438,-0.857752141136185,0.391029341760738,0.802053324886362  
"7517","KARS",177.4540238979,0.134409153653908,0.156701975756157,0.857  
737453566388,0.391037453782444,0.802053324886362  
"7518","BCL2L10",2.65853207830821,-0.762435729176386,0.889137421318009  
, -0.857500439072953,0.391168372258748,0.802056458947672  
"7519","GALNT7",40.6551112178664,-0.257985406964394,0.301063486355572,  
-0.856913636679606,0.391492615771337,0.802104230808699  
"7520","CFB",828.622937802686,-0.563416266873523,0.657416346408396,-0.  
857015907729683,0.391436093147534,0.802104230808699  
"7521","C0X6C",1819.40551067074,-0.224530861684003,0.262042254653312,-  
0.856849831265048,0.391527881920221,0.802104230808699  
"7522","CCIN",3.62212175157021,-0.703127752739684,0.820644461673921,-0  
.856799485742547,0.391555709958604,0.802104230808699  
"7523","OASL",11.9233405409685,-0.653983292557667,0.76315349571414,-0.  
856948564385053,0.39147331155455,0.802104230808699  
"7524","OXLD1",107.817178040256,0.200730483345202,0.234130106074812,0.  
857345886483572,0.391253756011153,0.802104230808699  
"7525","CYB5A",1252.29617116974,-0.243311007791433,0.283976722773946,-  
0.856799125698466,0.391555908974081,0.802104230808699  
"7526","PSTPIP1",4.82829281838021,-0.572714734318099,0.66865777649047,  
-0.856513981373342,0.391713542656753,0.802320523525624  
"7527","AL139420.1",5.14530688220473,-0.643494621708551,0.751577746125  
761,-0.856191691445951,0.391891757550798,0.802546400474438  
"7528","RPL10A",9725.17152478097,-0.219119865053877,0.255943400279915,  
-0.856126256095037,0.391927946984857,0.802546400474438  
"7529","COL1A2",29478.5533295244,0.280574731420177,0.327874781462678,0  
.855737456136482,0.392143017067438,0.80266692445818  
"7530","MT1H",5.09076810773639,-0.742020233087252,0.867024987024655,-0  
.855823354795831,0.392095494874682,0.80266692445818  
"7531","BCAT2",67.6039710679593,-0.217290749775688,0.253888612574728,-  
0.855850711743648,0.392080360771839,0.80266692445818  
"7532","TRIM2",139.83359001072,0.211563776046279,0.247400939726744,0.8  
55145401953415,0.392470657505058,0.803230906192309  
"7533","SCML4",2.86247355630174,0.901630273722581,1.05466341965475,0.8  
54898593162296,0.392607289514624,0.803237608063261  
"7534","RPF2",172.625177200943,-0.19608718379344,0.229430581544423,-0.  
854668904526457,0.392734469800376,0.803237608063261  
"7535","AGPAT5",34.7341344723376,-0.256288619673131,0.299862833549541,

-0.854686179808908,0.39272490348114,0.803237608063261  
"7536","NDUFA12",556.880435644684,-0.225780287704384,0.264131585367257  
,-0.854802303898838,0.392660602547717,0.803237608063261  
"7537","AC006504.1",2.81181119650779,0.915275007563358,1.0705883483169  
,-0.854927114611589,0.392591498721375,0.803237608063261  
"7538","CDC42EP4",437.194307204798,-0.239063150089456,0.27985285616128  
7,-0.854245882527912,0.392968765527922,0.803610177847297  
"7539","MRPL11",399.747534633789,-0.216639357469332,0.253672486630296,  
-0.854012038700371,0.39309831903721,0.803768482286589  
"7540","AUH",93.3412879258091,0.161703222501214,0.189366540569936,0.85  
3916547318951,0.393151230348335,0.803770055148485  
"7541","CDC7",10.1092649440054,-0.399142008778899,0.46772193148511,-0.  
853374584149909,0.393451611241559,0.803839371322471  
"7542","APH1A",444.475887944995,-0.149720664572608,0.175459762985268,-  
0.853304837674825,0.3934902780357,0.803839371322471  
"7543","BMP1",241.058408515252,0.233417740776135,0.273554720405412,0.8  
53276230913533,0.393506138022407,0.803839371322471  
"7544","ADAM32",19.6388939085396,0.331606681646754,0.388663752762063,0  
.85319682962502,0.393550161230664,0.803839371322471  
"7545","TMEM109",649.577599546207,-0.152510212922997,0.178652795519594  
,-0.85366821425568,0.39328885069381,0.803839371322471  
"7546","RAD52",16.9145495568221,-0.373636422946198,0.437886546386679,-  
0.853272214068563,0.393508365048176,0.803839371322471  
"7547","KANK2",599.011109683355,0.196496031015406,0.230204668549634,0.  
853571008152859,0.39334272797677,0.803839371322471  
"7548","PIG0",31.4822280625679,-0.271525810704549,0.318412337068314,-0  
.852749027266157,0.393798496371587,0.803950375788481  
"7549","TRIM21",39.7207961971973,0.2287525792714,0.268261406124872,0.8  
52722658006641,0.393813122775143,0.803950375788481  
"7550","ANKRD13D",109.935506286324,-0.180259399101422,0.21139132054990  
2,-0.852728478314551,0.393809894359945,0.803950375788481  
"7551","ATL1",165.835786531552,-0.185581613387373,0.217568039528027,-0  
.852981962745804,0.393669306864406,0.803950375788481  
"7552","PPIC",1680.44295853094,0.289662443098398,0.339841272937464,0.8  
52346275055592,0.394021929330175,0.804270132497967  
"7553","GNLY",35.8557987763852,0.528901290130512,0.620616657297467,0.8  
52218972712822,0.394092568211551,0.804307816626646  
"7554","MFSD9",36.4639869476876,0.266380325703113,0.312678678127951,0.  
851929934263404,0.394252981402757,0.804422198322104  
"7555","LPAR2",9.96737537751483,-0.488741152590304,0.573636424475719,-  
0.85200508847916,0.394211267830919,0.804422198322104  
"7556","HSPA6",5.73897637858055,-0.781944657499031,0.918027917467226,-  
0.8517656627005,0.394344167937508,0.804445003394069  
"7557","CYB561",216.218652957924,-0.186285538458802,0.218740561088255,  
-0.851627780106325,0.394420715903495,0.804445003394069  
"7558","LILRB3",4.71937280822266,-0.607541564860842,0.713339098809601,  
-0.851686898804074,0.394387894009763,0.804445003394069  
"7559","AL645568.1",17.6578738873158,0.360132606337554,0.4229558022006  
74,0.85146628669888,0.394510383260789,0.80452143907462  
"7560","AP1S3",4.49819047544955,0.778266887903102,0.914703831845697,0.

850840305689666,0.39485806854329,0.805123958544289  
"7561","PSMD4",506.790317205079,-0.199853164738519,0.234947915474158,-  
0.850627528808616,0.394976292251005,0.805152016007569  
"7562","ADSL",174.59217730317,-0.199395118492314,0.234384372523546,-0.  
850718485816641,0.394925751835654,0.805152016007569  
"7563","SLC47A1",6.24085202680921,0.670563202115193,0.788403512910076,  
0.850532996282674,0.395028823553025,0.805152626612439  
"7564","HIPK1-  
AS1",3.91462758648666,0.67522975897615,0.794744336367984,0.84961883725  
0202,0.395537035540148,0.805152751739022  
"7565","NBPF10",32.7959990431284,0.44626879520266,0.524842473435724,0.  
850290930688774,0.395163357576738,0.805152751739022  
"7566","AC092910.3",3.80173085275054,0.675335185518593,0.7946640006823  
71,0.849837396608741,0.395415495063081,0.805152751739022  
"7567","TSPAN18",49.411813807772,0.301892023090127,0.355290420780555,  
0.849704932733299,0.395489155298062,0.805152751739022  
"7568","EED",67.1802798872633,-0.188566142511328,0.2217751766134,-0.85  
0258109995952,0.395181600631791,0.805152751739022  
"7569","BC02",18.6442057879737,-0.34914901632136,0.410794913648967,-0.  
849935100753742,0.395361169259761,0.805152751739022  
"7570","RMDN3",83.9778354497354,-0.164025943328711,0.192978696933786,-  
0.849969172426274,0.395342225669081,0.805152751739022  
"7571","CIA03",49.3159434192945,-0.266605936251401,0.31380416509506,-0  
.849593363971568,0.395551202654532,0.805152751739022  
"7572","SARM1",19.5732327994259,0.311959949176935,0.366962408276579,0.  
850114186469509,0.395261605100817,0.805152751739022  
"7573","ARL4D",288.448384097243,0.263395634752086,0.310014278000463,0.  
849624205862196,0.395534049793995,0.805152751739022  
"7574","CCR7",5.38454387466725,-0.762086653185435,0.897252783202245,-0  
.849355574541201,0.395683465440379,0.805315635036102  
"7575","SLC35A3",163.749997516402,0.161344430321061,0.190123120590055,  
0.848631296500511,0.396086486600568,0.805862481692112  
"7576","SEC24A",99.1400622815082,0.198742594858954,0.234203077985745,0  
.848590874928851,0.396108986297836,0.805862481692112  
"7577","CCDC144NL-  
AS1",22.2346043640105,-0.39606496371107,0.466665491209341,-0.848712774  
292968,0.39604113628961,0.805862481692112  
"7578","ARNTL",68.5507834972101,0.789123564917525,0.930416091080348,0.  
848140495937939,0.396359731152592,0.806053463814934  
"7579","HELB",35.6982873850584,0.486021646932055,0.572999124236876,0.8  
48206613892023,0.396322914517349,0.806053463814934  
"7580","AARSD1",130.014918968975,-0.212619145095809,0.250642161382626,  
-0.848297604532813,0.396272251334024,0.806053463814934  
"7581","HSPA1A",978.75932473403,-0.278181728547528,0.328057973901082,-  
0.847965148475274,0.396457380342238,0.806145695551457  
"7582","CASP8",53.6297924940357,0.208240788213,0.24566116554877,0.8476  
74835979151,0.396619084291942,0.806261794060436  
"7583","ABCF1",244.324074743967,-0.17640862512648,0.208087031957412,-0  
.847763666322967,0.396569601598345,0.806261794060436  
"7584","UBE2T",7.7024519392569,0.477744709023025,0.564329303372593,0.8

46570798588494,0.397234396130488,0.806264433061585  
"7585","SLC39A10",170.876236168656,0.157511031606758,0.186042280498618  
,0.846641049467939,0.39719522614885,0.806264433061585  
"7586","SF3B1",796.389301745505,0.143247595408015,0.169092114480844,0.  
847157159562537,0.396907528614028,0.806264433061585  
"7587","KLF7-  
IT1",3.66184044462407,0.751131016424838,0.887427253300083,0.8464141862  
12561,0.397321727321693,0.806264433061585  
"7588","CNOT9",78.3390491480215,-0.192277988130288,0.226981136718282,-  
0.847109988566733,0.396933818129519,0.806264433061585  
"7589","TIGIT",2.4202941428105,0.827140562186257,0.977293082728779,0.8  
46358760543697,0.397352636910079,0.806264433061585  
"7590","ZCCHC24",651.499784177646,0.149308528451299,0.176396219687423,  
0.84643836878067,0.397308241728115,0.806264433061585  
"7591","GSEC",26.9743289377783,0.41144925257985,0.486114681297272,0.84  
6403674708681,0.397327589228086,0.806264433061585  
"7592","OTUD7A",10.7442922401082,-0.391548773378867,0.462428979405309,  
-0.846721963408101,0.39715011362118,0.806264433061585  
"7593","SCAMP2",262.310004925657,-0.188167330524914,0.222244809216086,  
-0.846666930888638,0.397180795959111,0.806264433061585  
"7594","PER1",362.200634862642,0.220090901474539,0.259955306529519,0.8  
46649004449338,0.397190790814198,0.806264433061585  
"7595","ANKRD40",127.665580870852,-0.179413139645126,0.21190758239287,  
-0.846657479733311,0.397186065415438,0.806264433061585  
"7596","MAFG",245.006450788955,-0.170078770122639,0.200751911825696,-0  
.847208719338681,0.396878794328793,0.806264433061585  
"7597","RLIM",198.565267699004,0.199113672776373,0.235222878481597,0.8  
46489397892267,0.39727978586057,0.806264433061585  
"7598","ZBTB5",17.8450390159324,0.352613009209007,0.416669928964371,0.  
846264596260697,0.397405153434296,0.806264864462974  
"7599","ICA1L",67.0187006830874,0.253140738636588,0.299453409725139,0.  
845342649024901,0.397919555272892,0.807099432822313  
"7600","PAK6",3.8950394044688,-0.907926186406142,1.07403713881155,-0.8  
45339656886337,0.397921225394069,0.807099432822313  
"7601","SMIM10",214.84202054467,-0.21356234904082,0.252681489039747,-0  
.845183989743019,0.398008119908316,0.807169473541205  
"7602","APOBEC3C",271.24339845697,0.151941087451811,0.179814526277769,  
0.844987836061142,0.398117630578598,0.807285355875965  
"7603","THRB-  
IT1",9.83292751866817,0.496801538040999,0.588211615736075,0.8445966124  
27166,0.39833610108971,0.807339064627714  
"7604","B4GALT1",498.01205209021,-0.249988092355,0.295941543279236,-0.  
844721189140799,0.398266526040289,0.807339064627714  
"7605","ZNF576",85.793102923237,-0.219006248933294,0.259299329645255,-  
0.8446078485159,0.398329825528042,0.807339064627714  
"7606","STRN4",81.0216504393492,-0.196312894113128,0.232442539599134,-  
0.844565260953032,0.398353611778034,0.807339064627714  
"7607","NUDT15",68.9537967090259,-0.200725719689995,0.237715070380081,  
-0.844396273947022,0.398448003802988,0.807424211729074  
"7608","E2F6",53.5502344975593,-0.245849078931268,0.291209596739949,-0

.844234124436538,0.398538589232966,0.807501623689033  
"7609","SRP9",779.028416361562,-0.21180010159202,0.250906306881487,-0.  
84414020605732,0.398591062758199,0.807501804759843  
"7610","ZNF467",3.01535450131777,0.756119755955923,0.896077995939945,0  
.843810203332566,0.398775472932402,0.807663108034816  
"7611","AC087392.1",11.7396463673063,-0.721985132532607,0.855619846429  
216,-0.843815317685406,0.398772614568128,0.807663108034816  
"7612","Z99572.1",11.481865825301,0.444413792081127,0.526734641652722,  
0.843714760598812,0.398828817252402,0.807665031259297  
"7613","FAM78B",15.8760474054182,-0.312318789528173,0.370318844181963,  
-0.843378063079904,0.399017036657136,0.807843622808539  
"7614","WASHC5",141.215368013102,0.169603514039341,0.201143636849782,0  
.843196019996416,0.399118823974373,0.807843622808539  
"7615","ENG",302.699555449932,0.147946045566342,0.175461567711433,0.84  
3182056880151,0.399126631937064,0.807843622808539  
"7616","APCDD1L-  
DT",14.6726344359209,0.526381383868563,0.62425042887002,0.843221501379  
482,0.39910457540866,0.807843622808539  
"7617","LINC02716",4.36671200421596,0.619412979382111,0.73480733944857  
6,0.842959706753799,0.399250979139946,0.807883150885045  
"7618","C12orf29",116.349148781709,-0.194605053738286,0.23085653601005  
, -0.842969651636002,0.399245417060777,0.807883150885045  
"7619","AC253572.1",4.88938779860128,-0.570156272446733,0.676488232860  
52,-0.842817723577891,0.399330394081005,0.807937790360769  
"7620","GMFB",157.991906805948,-0.155783063088801,0.184882111462125,-0  
.842607550599692,0.399447966826174,0.808069607431164  
"7621","CACNA2D3-  
AS1",2.56575765260148,0.993941778298961,1.18004239024683,0.84229328243  
9671,0.399623810244116,0.808087821627284  
"7622","TAF7",585.681556929057,0.116818031404339,0.13869882407153,0.84  
2242406785612,0.399652281231612,0.808087821627284  
"7623","SLC13A4",4.2864517474691,0.68052064307166,0.807967215692499,0.  
842262693156918,0.399640928444609,0.808087821627284  
"7624","MEN1",43.3001981429922,0.235502521545918,0.279622236550175,0.8  
42216715134742,0.39966665923363,0.808087821627284  
"7625","MYO5A",86.6152568872924,-0.250502622025777,0.297543415472277,-  
0.841902757714081,0.399842386596615,0.808337100247451  
"7626","SWSAP1",9.81791249164534,-0.421982831112394,0.501290480043159,  
-0.841793028018533,0.399903815148304,0.808355272818135  
"7627","ZBTB2",41.5466543176876,-0.265763902561623,0.315789805948954,-  
0.841584805953436,0.400020397005272,0.808378922369726  
"7628","PPM1F",76.5798306584171,0.216660063419759,0.25743723579735,0.8  
41603440732678,0.400009962710039,0.808378922369726  
"7629","PLEKHA3",276.662553853668,-0.121766106320297,0.144791955575886  
, -0.840972869217719,0.400363133702452,0.808541557188955  
"7630","AC079610.1",2.47705667887957,-0.796334312725636,0.946792139083  
907,-0.841086738950061,0.400299343591488,0.808541557188955  
"7631","HDAC11",26.4531221593843,-0.295194440603577,0.350907892725777,  
-0.84123055286836,0.400218787402306,0.808541557188955  
"7632","AC004908.2",4.41998813360526,-0.607451851627072,0.722067472965

182,-0.841267436036914,0.400198129167451,0.808541557188955  
"7633","HIF1A",228.950383399343,0.191285161439351,0.227440800791355,0.841032746867734,0.400329589330456,0.808541557188955  
"7634","SLC25A20",52.2100787173227,0.271591399505746,0.323167348180546,0.840404827513745,0.400681443340008,0.808680177837164  
"7635","ZYX",589.506166847839,0.194856736935975,0.231866782347297,0.840382287464154,0.400694077088567,0.808680177837164  
"7636","CD44-AS1",4.32173226548683,2.22307587296113,2.64524973654153,0.840403022161394,0.40068245523525,0.808680177837164  
"7637","SULT1A3",8.57246806472074,-0.428686856980959,0.50992842642176,-0.840680446056157,0.400526977881574,0.808680177837164  
"7638","GPS1",160.132226905623,-0.134408242053417,0.15991561249454,-0.840494808210213,0.400631011341597,0.808680177837164  
"7639","NCDN",39.2932084482193,0.232453641275982,0.276825314685913,0.839712370740823,0.401069676167625,0.808697064502805  
"7640","AC108488.3",5.39860626722269,0.582798249600232,0.693926881226179,0.839855416136091,0.400989457826378,0.808697064502805  
"7641","AC026748.3",9.28423523710531,0.526740728395177,0.627250101350268,0.839761886464862,0.401041907183991,0.808697064502805  
"7642","TNFAIP3",245.479008589301,0.313808694424501,0.373567111152416,0.840032982176706,0.400889894078856,0.808697064502805  
"7643","RCC1L",143.272934766189,-0.181195957174643,0.215740437175744,-0.839879438211386,0.400975987446238,0.808697064502805  
"7644","MAN2A2",60.99292949106,0.223058479996041,0.265629957835439,0.83973389829105,0.401057603129687,0.808697064502805  
"7645","PHF20",298.466460231737,-0.150926891614314,0.179707849417559,-0.839845850381462,0.400994821899509,0.808697064502805  
"7646","AC023794.1",3.20390776849136,0.712175433748025,0.848292902927298,0.839539540281951,0.401166610511481,0.808786725220309  
"7647","DAG1",172.846920610397,0.167782641821823,0.199906625971318,0.839305055580778,0.401298146974054,0.80880410254617  
"7648","AC108519.1",12.129460574317,-0.493454884677116,0.587975762444655,-0.839243581445356,0.401332635768774,0.80880410254617  
"7649","COPS6",565.391956383319,-0.191317609883832,0.22793100187016,-0.839366335926587,0.401263768672013,0.80880410254617  
"7650","AC011389.1",3.67621715711118,0.86809210680922,1.03465328847308,0.83901739498681,0.40145954833006,0.808913797188699  
"7651","ADNP",222.309208867218,0.136195644576798,0.162338753178163,0.838959533139487,0.40149201831273,0.808913797188699  
"7652","SMAP2",91.8943399133678,-0.208917986887564,0.249137624213771,-0.838564578701704,0.401713694602395,0.809254652678505  
"7653","AP00",20.0924770381293,-0.408967133898336,0.487801326011313,-0.838388729367355,0.401812417278801,0.80934776066284  
"7654","AC104695.4",58.1880136214623,0.27116762841856,0.32361342031105,0.837936906812825,0.402066139414504,0.809546055673665  
"7655","TTC12",18.2969611652582,0.339244277436822,0.404858545168367,0.837932857007482,0.402068414027738,0.809546055673665  
"7656","PIAS4",57.5386998255218,0.191462963009479,0.228457968340386,0.838066469733342,0.401993373192197,0.809546055673665

"7657", "PCDHB9", 17.6532770667481, 0.424470691196604, 0.506794374187374, 0.837559990434437, 0.40227787129696, 0.80986200679674  
"7658", "ZNF564", 25.2771754088837, 0.267276495729862, 0.319334556085208, 0.836979558386861, 0.402604058363793, 0.810412844042553  
"7659", "TEKT4", 2.43620663681537, -0.752742313436464, 0.900730421811835, -0.835702109319579, 0.403322508342447, 0.810441536359688  
"7660", "PNKD", 379.504280941546, -0.221014629386049, 0.264345761407235, -0.836081608456613, 0.403108994136564, 0.810441536359688  
"7661", "ARMC9", 33.4307021817837, 0.291754690146019, 0.349099932489336, 0.835734020529872, 0.403304551815389, 0.810441536359688  
"7662", "BLOC1S5", 125.265239075944, 0.196929696075292, 0.235544549337137, 0.836061359218399, 0.403120385073779, 0.810441536359688  
"7663", "NDUFA4", 1816.90422088786, -0.235518441575469, 0.281788713110928, -0.835797995510046, 0.403268554357947, 0.810441536359688  
"7664", "PREX2", 31.6654212432271, 0.423409678443989, 0.506558937957757, 0.835854718408498, 0.403236639113442, 0.810441536359688  
"7665", "C9orf78", 329.914497769648, -0.142972267261106, 0.170988293306031, -0.836152373339489, 0.403069187815948, 0.810441536359688  
"7666", "AC008014.1", 9.89048338991276, 0.443197872255939, 0.530225517025016, 0.835866735993072, 0.403229877591337, 0.810441536359688  
"7667", "PLCG2", 4.10996768124834, 0.772984321864772, 0.924676950150287, 0.835950676329868, 0.403182651655253, 0.810441536359688  
"7668", "MED9", 30.4029208063827, 0.272849932746982, 0.326484407828395, 0.835721174440882, 0.403311780287915, 0.810441536359688  
"7669", "VPS16", 99.6416330785862, -0.165484689219484, 0.197965167360587, -0.835928317217842, 0.403195230861604, 0.810441536359688  
"7670", "RALY", 480.72050350218, -0.177887676360127, 0.21277057693471, -0.836053926829896, 0.403124566112572, 0.810441536359688  
"7671", "IL10RB-DT", 4.28536182614195, -0.599184127409178, 0.716626822624176, -0.836117360518351, 0.403088882764853, 0.810441536359688  
"7672", "JPX", 488.697545503341, 0.147568949357582, 0.176592763721933, 0.835645505780444, 0.403354360489882, 0.810441536359688  
"7673", "HHLA3", 51.6915258811047, 0.253283219307022, 0.303371847912779, 0.834893616693932, 0.403777609144367, 0.810458334716123  
"7674", "LANCL1", 80.4416268410549, 0.166628491150654, 0.199605256990088, 0.834790093524084, 0.403835904570519, 0.810458334716123  
"7675", "RAD18", 39.5762654763193, -0.220446655767431, 0.264048700849656, -0.834871200116029, 0.40379023182315, 0.810458334716123  
"7676", "RABL3", 90.4739013388863, 0.161975944694814, 0.194025283710241, 0.834818749378614, 0.403819767531254, 0.810458334716123  
"7677", "ACTL6A", 141.880232137949, -0.204187513581792, 0.244542200074617, -0.834978639758242, 0.403729735169113, 0.810458334716123  
"7678", "NIPSNAP3A", 71.4587897327513, -0.227948344459564, 0.272891584424397, -0.835307343538532, 0.403544683751579, 0.810458334716123  
"7679", "CBLN3", 18.7111240873146, 0.354972926919313, 0.425008153608562, 0.835214392724916, 0.403597007416649, 0.810458334716123  
"7680", "BMERB1", 305.501262017067, -0.1628299653557, 0.194948982699345, -0.835243985893583, 0.403580348455239, 0.810458334716123  
"7681", "LAMA3", 10.5913021114706, -0.487413331861905, 0.58345263295311, -0



.835394862124269,0.40349542169733,0.810458334716123  
"7682","SMARCA4",128.193733205032,0.235743917174468,0.282460786988886,  
0.834607591685794,0.403938686321107,0.810559079619873  
"7683","CIT",5.30167426337114,0.733430519374856,0.879339711771572,0.83  
4069597399669,0.40424176612137,0.811061671841848  
"7684","BDP1",329.087861773002,0.188859687395157,0.226468789297376,0.8  
33932516622258,0.404319012507545,0.811111085086389  
"7685","NFIA",3094.79033736634,0.17334515092894,0.207929079229884,0.83  
3674402690406,0.404464486252839,0.811191784489658  
"7686","L2HGDH",14.5037942120218,0.358533268655619,0.430060482162204,0  
.833681036799825,0.404460746857923,0.811191784489658  
"7687","SMARCA5",362.024212997655,0.153412698571704,0.184134592895657,  
0.833155227158418,0.404757189871004,0.811462099344717  
"7688","TXNL4B",44.9485684099961,0.296047439763491,0.355307997348622,0  
.8332135554861,0.404724298892758,0.811462099344717  
"7689","MLLT6",228.656341120225,0.219031527590462,0.262853155765889,0.  
833284755331389,0.404684151912931,0.811462099344717  
"7690","METTL26",527.341199265459,-0.204955851232364,0.246033575468761  
, -0.833040168773173,0.404822075259351,0.811486643709089  
"7691","AC008269.1",6.43425843010495,0.622321154847363,0.7473759427557  
32,0.832674855110715,0.405028129443037,0.811567428290519  
"7692","NFKBIE",22.6845213902982,-0.299611819438219,0.359832074126408,  
-0.832643449491294,0.405045846624179,0.811567428290519  
"7693","AP3M2",46.1685166282995,0.243397736436907,0.292336161492007,0.  
832595376482573,0.405072967451654,0.811567428290519  
"7694","SLC26A11",62.1830564290915,0.195865833925642,0.235207908799334  
,0.832734897927023,0.404994258149596,0.811567428290519  
"7695","EPSTI1",171.698601337365,0.330739084915509,0.397396601194804,0  
.832264503322666,0.405259662017311,0.811768280930272  
"7696","BRICD5",4.34037211434033,0.589470746841313,0.708381217826804,0  
.832137741666432,0.405331200669498,0.811768280930272  
"7697","DDX27",256.607619382833,-0.170154424833517,0.204456049337835,-  
0.832229838073219,0.405279224795703,0.811768280930272  
"7698","AC092807.3",9.01428920234054,-0.463361266451219,0.556996419774  
755,-0.831892719595215,0.405469501641612,0.811911972781505  
"7699","PIP4K2A",170.196298468517,0.158594359723034,0.190679936266313,  
0.831730714979544,0.405560959482166,0.811911972781505  
"7700","TMBIM6",2215.52630383493,0.111066351437207,0.133521523229238,0  
.831823579832304,0.405508532191191,0.811911972781505  
"7701","AL031846.2",13.6539612877692,0.47956193691619,0.57668266427658  
2,0.831587225736662,0.405641974974154,0.811968711105907  
"7702","FMOD",266.502649856482,-0.291228232799146,0.350346133585831,-0  
.831258589379574,0.405827562844083,0.812089652082873  
"7703","USP13",56.7289641125017,-0.213957991522109,0.257369570519475,-  
0.831325906517449,0.405789543309343,0.812089652082873  
"7704","CCHCR1",50.1864016201084,0.224637216103229,0.270256392230542,0  
.831200380679998,0.405860439808398,0.812089652082873  
"7705","EPHB2",48.941369128253,-0.328817877478807,0.396652763918002,-0  
.828981687234083,0.407114769733784,0.812184282711028  
"7706","CAP1",669.052218149722,-0.145433117747387,0.175072559489171,-0

.830701956787136,0.406142020661068,0.812184282711028  
"7707","AK4",53.3614212616741,-0.294850470676823,0.355137146108487,-0.830243960418469,0.406400865093062,0.812184282711028  
"7708","NBP19",101.418767508051,0.366661856584561,0.441742952928941,0.830034421949325,0.406519322143881,0.812184282711028  
"7709","HK2",4.38099742869305,-0.571471660739793,0.687997136271951,-0.830630871280112,0.406182189388902,0.812184282711028  
"7710","GCC2",601.702787703507,0.143308522913847,0.172862275221775,0.829032955455363,0.407085759369075,0.812184282711028  
"7711","THRB",163.421294685888,0.212251559160718,0.255554006153339,0.830554614876047,0.4062252827045,0.812184282711028  
"7712","AC139887.2",28.5519681701056,0.402134425221746,0.484049047804416,0.830772061314397,0.406102408584602,0.812184282711028  
"7713","GNPDA2",146.525755467032,-0.173122918268752,0.208852381922792,-0.828924796906322,0.407146962837156,0.812184282711028  
"7714","PCDHGA12",28.1435942238541,0.367843772150353,0.443431068980266,0.82953991698476,0.406798959179659,0.812184282711028  
"7715","TBPL1",103.81304083184,-0.207531377693058,0.250291133268496,-0.82915992661407,0.407013917448568,0.812184282711028  
"7716","RAET1E-AS1",3.65152946430924,0.653607460254277,0.787719435161624,0.829746520244445,0.406682113387931,0.812184282711028  
"7717","ATP6V1F",1022.18383335556,-0.213197420631694,0.25697128779413,-0.829654637534815,0.406734075767675,0.812184282711028  
"7718","UBE2R2",604.249659176419,-0.142075206669216,0.17113067638326,-0.83021472053922,0.406417393851075,0.812184282711028  
"7719","PPP1R26-AS1",4.32874569567946,-0.652414522089311,0.78646892177516,-0.829549018436391,0.406793811373908,0.812184282711028  
"7720","NAP1L4",335.199130777678,0.136418263124059,0.164349903327194,0.8300477235601,0.406511801816325,0.812184282711028  
"7721","PSME1",972.773194502587,-0.191473105570544,0.230950880494749,-0.829064193911556,0.407068083545894,0.812184282711028  
"7722","ZCCHC14",150.421356637037,0.164637160637235,0.198626020790951,0.828880123468372,0.407172243710076,0.812184282711028  
"7723","CBX8",9.21990649809738,0.482527982566174,0.581778377885309,0.829401711902911,0.406877133125094,0.812184282711028  
"7724","ZBTB14",53.2783431311061,-0.186016364016276,0.224377416637903,-0.829033361750782,0.407085529469822,0.812184282711028  
"7725","ESC01",107.157257830456,0.174544156869929,0.210467757483642,0.829315420835876,0.406925947113214,0.812184282711028  
"7726","TIMM29",77.3889543720476,0.201403053961669,0.242689035865247,0.82988114087485,0.406605988608555,0.812184282711028  
"7727","AL109809.5",3.54244069496467,0.747619601234979,0.900907919784387,0.829851292032049,0.406622866688759,0.812184282711028  
"7728","TMEM184B",93.8361662769203,0.174298576032,0.210140767413794,0.829437229991573,0.406857041914724,0.812184282711028  
"7729","AC087190.1",17.6330539325562,-0.467720213926934,0.564369384872348,-0.828748380872441,0.407246802810323,0.812227903392565  
"7730","COPS7B",57.2554722299922,0.229152632942731,0.27655059762177,0.

828610152765374,0.407325041106905,0.812278849762346  
"7731","NOM03",4.5684504603839,0.645539018598841,0.779217041814939,0.8  
2844571404042,0.407418126510215,0.812359386904017  
"7732","SMIM1",10.7464263894126,0.474015306337382,0.572438683693491,0.  
828063022014758,0.407634809747598,0.812383119487503  
"7733","BACH2",40.3587023638306,0.334991758646575,0.404487663335446,0.  
828187826259519,0.407564137054931,0.812383119487503  
"7734","GDF11",73.7274717459995,0.27770497939225,0.335371268403232,0.8  
2805238717812,0.407640832256623,0.812383119487503  
"7735","SNAI3-  
AS1",9.35275916453343,0.432063629226022,0.521761532517743,0.8280864002  
01089,0.407621570864838,0.812383119487503  
"7736","PSMA2",797.975379677413,-0.214024156141187,0.258545115616245,-  
0.827801970387483,0.407782658636427,0.812410825693463  
"7737","TMEM41B",119.069818474149,-0.189250453176157,0.228610895358141  
, -0.82782779394516,0.407768031812895,0.812410825693463  
"7738","IRGQ",65.4283760083483,0.213705850890376,0.258177216601569,0.8  
27748682488033,0.407812842634837,0.812410825693463  
"7739","BCAR3",11.763741046783,0.360110819877791,0.435220781969054,0.8  
27421012040267,0.40799847509109,0.812413070332018  
"7740","SF3B5",914.486251572636,-0.210787498121551,0.254711133484811,-  
0.827555102274793,0.407922503963341,0.812413070332018  
"7741","ATP2B1-  
AS1",102.806486639732,-0.253633861109055,0.30645322245006,-0.827642989  
299576,0.407872714631683,0.812413070332018  
"7742","SNPH",7.79017639559792,0.459862600387713,0.555809433943913,0.8  
27374586150185,0.408024780441809,0.812413070332018  
"7743","COX7C",2524.00828725417,-0.192024991102903,0.232282252318558,-  
0.826688174349002,0.408413825796588,0.812977676220868  
"7744","CYREN",71.4087735022826,-0.228090848465426,0.275897920371555,-  
0.82672188379765,0.408394714755831,0.812977676220868  
"7745","CSTF2T",112.71045149793,-0.212786837195337,0.257519328275191,-  
0.826294626584098,0.408636980902757,0.813316857406843  
"7746","UNC50",315.951944600348,-0.212588890399339,0.257493748638712,-  
0.82560796727388,0.409026514114164,0.813380023879004  
"7747","AC021148.2",3.29347522448608,0.755391434640469,0.9146506629436  
16,0.82587972134563,0.408872325023988,0.813380023879004  
"7748","TRPM3",7.14307023767386,0.582055084713584,0.705019177231654,0.  
825587591814305,0.409038076231595,0.813380023879004  
"7749","NEAT1",12131.6967253021,0.312208429168459,0.378045828177746,0.  
825848100674365,0.408890264328856,0.813380023879004  
"7750","ZBTB25",73.1914739448745,0.191346669965032,0.23165526157415,0.  
825997513135633,0.408805502519198,0.813380023879004  
"7751","ARNT2",3.91530758575675,0.676747322836139,0.81954792150376,0.8  
25756865558757,0.408942027226929,0.813380023879004  
"7752","TSC22D3",3867.07438884282,0.257400912436743,0.311733732030142,  
0.825707602319581,0.40896997870088,0.813380023879004  
"7753","MAPK10",72.4934286976988,0.363797683464226,0.440907339480148,0.  
.825111425664091,0.409308333563694,0.813497674301746  
"7754","ZNF503",892.734503110358,0.14401508609578,0.174513475409768,0.

825237625676893,0.409236695954811,0.813497674301746  
"7755","PRDM10",15.0935624917945,0.455300399436454,0.55178980070663,0.  
825133771688765,0.409295648268876,0.813497674301746  
"7756","TFE3",120.274939244458,0.17998387426342,0.218125749807906,0.82  
5138134410653,0.409293171685039,0.813497674301746  
"7757","ZBTB7B",40.3963099851064,-0.2667952241202,0.323494505698184,-0  
.824728764849924,0.409525597097397,0.813551422162899  
"7758","ARRDC3",451.31072246577,-0.267318951604468,0.324135574594496,-  
0.824713399443711,0.409534322554428,0.813551422162899  
"7759","PCMT1",512.436994067823,-0.216783481788906,0.262944106103319,-  
0.824447008915746,0.409685613650897,0.813551422162899  
"7760","BUD23",198.247465775287,-0.179168435647992,0.217328439210122,-  
0.824413207489907,0.409704812860888,0.813551422162899  
"7761","TMEM170A",124.119785293416,-0.174858270542047,0.21209873821013  
7,-0.824419192766745,0.409701413184642,0.813551422162899  
"7762","IZUM04",5.96687735238448,-0.518051529345407,0.62823550717589,-  
0.824613577914764,0.409591010273556,0.813551422162899  
"7763","MAPK1",292.118424558881,0.174806537139635,0.211945588126376,0.  
824770822950105,0.409501714392894,0.813551422162899  
"7764","ZNF766",105.828514119722,0.182034538776974,0.220867535929879,0  
.824179696715436,0.409837461596071,0.813710003928829  
"7765","CCDC191",50.5569828079543,0.216796571437382,0.263095509361585,  
0.824022317839825,0.409926877050054,0.813759587364832  
"7766","ADAM8",8.30717601555258,-0.485918135226318,0.589810456037298,-  
0.823854732062583,0.410022104346079,0.813759587364832  
"7767","AL133467.1",56.3632467543028,0.303224324465922,0.3680960547697  
56,0.823764124979793,0.410073595501136,0.813759587364832  
"7768","LRRRC3",7.68653291338341,0.599093006355366,0.727164870069697,0.  
823875067421705,0.410010548480385,0.813759587364832  
"7769","KLF11",156.729340834723,0.205215249550511,0.249236894418978,0.  
823374284248365,0.410295182171812,0.813906893964885  
"7770","ZFP2",7.72391050172487,0.448525879369941,0.544882673725856,0.8  
23160472883023,0.410416743417361,0.813906893964885  
"7771","PAXIP1",37.5278310672393,0.24710026965975,0.300369514679696,0.  
822654289411657,0.410704616460392,0.813906893964885  
"7772","NFRKB",66.419898274246,0.169474060146887,0.205989873128785,0.8  
22730057418562,0.410661518590551,0.813906893964885  
"7773","GOLGA5",144.581962670267,-0.170438204014349,0.20710557733324,-  
0.822953230950937,0.410534590069466,0.813906893964885  
"7774","CDIPT",473.330688924233,-0.124167691556271,0.150888322335163,-  
0.822911207670944,0.410558488760257,0.813906893964885  
"7775","CCL22",2.89469543345783,-0.948011621430383,1.15190663445743,-0  
.822993455434793,0.410511715130412,0.813906893964885  
"7776","ZNF594",14.8611807794825,0.411780467009033,0.500229070833185,0  
.823183799220562,0.410403480319881,0.813906893964885  
"7777","TSEN54",24.4477902688759,0.25561630102295,0.310737351498253,0.  
822612086350319,0.410728623298919,0.813906893964885  
"7778","AAR2",71.7588433816465,0.181870346445789,0.221038673348487,0.8  
22798760464209,0.410622441688901,0.813906893964885  
"7779","PIM2",9.78385977605771,0.50446303748625,0.612642370556211,0.82

3421724860874,0.410268212979846,0.813906893964885  
"7780","ADPGK",165.271307869652,0.143783216040413,0.174825998921045,0.  
822436118928446,0.4108287297942,0.814000625935423  
"7781","IL6",239.054232490556,0.734112245137483,0.892915173078525,0.82  
2152279713724,0.41099023424536,0.814215969784375  
"7782","PSMD12",287.68749067507,-0.125702723544008,0.152940508700735,-  
0.821906011768114,0.411130391191881,0.814388972015272  
"7783","DNM1",502.810822185652,-0.185931296373135,0.226315742824763,-0  
.821557060292983,0.411329036360293,0.8145731109319  
"7784","SAFB",207.607718641272,0.139302218327508,0.169546771771614,0.8  
21615279795206,0.411295890192157,0.8145731109319  
"7785","LMBR1L",98.4776666319832,0.190400544356168,0.232029975253429,0  
.820585978808159,0.411882136902703,0.815533558554557  
"7786","C16orf46",8.5871189851684,0.442454215793699,0.53923647759397,0  
.820519816774812,0.411919836970858,0.815533558554557  
"7787","AC097500.1",2.55272219319036,0.948545757628047,1.1563211535782  
,0.820313417853513,0.412037459164738,0.815661671121668  
"7788","TMEM14B",579.355615104161,-0.187014413936522,0.228072889431156  
, -0.81997651892323,0.412229493221727,0.815832281167406  
"7789","POC1B",47.908719302137,0.250132656432262,0.305014334405945,0.8  
20068528646129,0.412177041957783,0.815832281167406  
"7790","GDAP2",53.4426593284699,0.231698367496685,0.282858483794277,0.  
819131759417897,0.41271124361414,0.815859622094042  
"7791","ZBED6",4.56383367776636,0.630145318820865,0.769298841612529,0.  
819116427499118,0.412719990199303,0.815859622094042  
"7792","TTL",99.1497792486416,-0.194980167621229,0.237865020964916,-0.  
81970929071571,0.412381852355355,0.815859622094042  
"7793","NIF3L1",69.665178208185,-0.220117343592013,0.268715320434295,-  
0.819146981408655,0.412702559849613,0.815859622094042  
"7794","HTRA3",1245.85722395246,-0.262396817138913,0.320421597395323,-  
0.818911144791461,0.4128371108899,0.815859622094042  
"7795","DHX15",185.89378632794,0.154812863584513,0.18897894244821,0.81  
9206952790204,0.412668348731925,0.815859622094042  
"7796","PDGFRA",2430.84059462111,0.195968854906899,0.23929595721009,0.  
818939263294149,0.412821067174312,0.815859622094042  
"7797","DNAJC21",293.151851718568,-0.126991279494616,0.15504126319467,  
-0.819080526550963,0.412740471477209,0.815859622094042  
"7798","GTF2H2C",52.583391187231,-0.2410235419188,0.294306752989841,-0  
.818953488053737,0.412812951022367,0.815859622094042  
"7799","NFYA",39.1844216424378,-0.24906826566942,0.304065520001145,-0.  
819126962072129,0.412713980402202,0.815859622094042  
"7800","ZNF574",22.6944376166144,0.303318426827359,0.370425105264168,0  
.818838740994749,0.412878424388947,0.815859622094042  
"7801","AC022137.4",12.7457575342907,-0.445328103119812,0.543374605004  
471,-0.819560021794077,0.412466971985845,0.815859622094042  
"7802","RND3",1357.86252138199,-0.320837610105523,0.391950922263716,-0  
.818565774134484,0.413034200898645,0.816062830921893  
"7803","ST3GAL3",52.9039689724467,0.202600075287636,0.247587315637406,  
0.818297475240395,0.413187347420103,0.816156196883763  
"7804","MTIF3",354.1967573172,-0.170176899566002,0.207951362078315,-0.

818349530703785,0.413157631238773,0.816156196883763  
"7805","TRMT12",33.0564829304734,-0.226764411883492,0.277219714078872,-  
-0.817995259236774,0.41335989429058,0.816392411337512  
"7806","SLC30A9",119.704582126411,0.171757097507799,0.210130559536135,  
0.817382763777696,0.413709722607498,0.816581161868348  
"7807","SRPK1",116.018642100775,-0.142899076805669,0.174831670310821,-  
0.817352351273766,0.413727097350891,0.816581161868348  
"7808","AC246817.1",7.03320670028582,0.665770722725744,0.8146784195076  
79,0.817219048379946,0.413803258739688,0.816581161868348  
"7809","TMEM216",94.8930389787732,-0.248784423306153,0.304506635610907  
,-0.81700821660926,0.413923732481953,0.816581161868348  
"7810","ENDOD1",81.861788501173,-0.207969186388513,0.25442534130712,-0  
.817407516562867,0.413695581595121,0.816581161868348  
"7811","CALML4",18.6795046599369,-0.371877967508012,0.455141474975959,  
-0.817060162508053,0.413894047567586,0.816581161868348  
"7812","ICAM2",56.0829021708375,-0.305364397316805,0.373747384794444,-  
0.817034204760392,0.413908881180128,0.816581161868348  
"7813","SNRNP70",404.187408268756,0.132779028605877,0.162392021632201,  
0.817645025114631,0.413559909938773,0.816581161868348  
"7814","BRCC3",70.9535539953161,0.182100839918022,0.222891456036747,0.  
816993361504178,0.413932221786524,0.816581161868348  
"7815","RPL34",17371.943221236,-0.20420003607474,0.249998231047311,-0.  
8168059238631,0.414039346354385,0.816649029079605  
"7816","ASMTL",161.00938301107,-0.220467382389488,0.269933249207623,-0  
.81674778130023,0.414072579389309,0.816649029079605  
"7817","ZNF287",32.248578195578,-0.287155414131586,0.351703586231308,-  
0.816469963268245,0.41423139597056,0.816857741958064  
"7818","SYF2",657.249273382599,-0.179462843263384,0.219917948958835,-0  
.816044548037215,0.414474657324814,0.816919427523591  
"7819","CYB5RL",25.8752441415686,0.289371580631907,0.354558917361799,0  
.816145262358827,0.414417059130975,0.816919427523591  
"7820","CCSAP",13.1266409152972,0.415380745553416,0.509013322362242,0.  
816050832669187,0.414471063025686,0.816919427523591  
"7821","PDGFRB",1568.01052039281,-0.150248211594546,0.184106180592462,  
-0.816095424450394,0.414445560677442,0.816919427523591  
"7822","SRSF3",1867.51598145707,0.169895894869648,0.208305990335168,0.  
815607340894434,0.414724749550503,0.817247228123886  
"7823","PARVB",116.956928200182,-0.254720583521619,0.312322755359902,-  
0.815568443702074,0.414747003932089,0.817247228123886  
"7824","RFX1",90.2864282157554,-0.199124620573792,0.244191420812874,-0  
.81544478471413,0.414817758054927,0.817282175411133  
"7825","KANSL3",71.2837252184566,0.219214107625638,0.268938671376816,0  
.815108167610793,0.415010396843202,0.817557222662998  
"7826","AP1G2",19.8269510125581,0.37447062784625,0.459836991418018,0.8  
14355162448934,0.415441517018073,0.818301940305851  
"7827","AC092835.1",6.02073724401828,0.511016943182317,0.6276921858099  
62,0.814120288151925,0.41557604437487,0.818462338576545  
"7828","ARRB1",128.585685733212,0.134443697315068,0.165191176772783,0.  
813867301762688,0.415720974450219,0.818490905143294  
"7829","UFM1",417.661109607325,-0.103350533249546,0.126988263728898,-0

.81385893636742,0.415725767302237,0.818490905143294  
"7830","RBC1",353.344217542877,-0.165502122601641,0.203365300497296,-  
0.813816920570683,0.415749840238209,0.818490905143294  
"7831","FCMR",2.80031272638908,-0.740940060749181,0.910583434794455,-0  
.813698154871917,0.415817891455449,0.818520341819148  
"7832","RPH3AL",11.8870923189013,0.430909864546372,0.5296432013078,0.8  
13585189958761,0.415882624999936,0.818543241110063  
"7833","CD38",13.4530736933124,-0.462317212551011,0.568738462188837,-0  
.812881918996202,0.416285762013565,0.819022976571679  
"7834","NECTIN1",39.6411655259247,-0.279529495935881,0.343857892768797  
,-0.812921563861938,0.416263030198754,0.819022976571679  
"7835","FBX034",77.9209700368483,-0.191778790032468,0.235920634818108,  
-0.812895362799979,0.416278053441304,0.819022976571679  
"7836","ATP10D",104.719792653424,0.176692268626017,0.217424321460774,0  
.812661009766079,0.416412441708528,0.819130075258902  
"7837","PTP4A3",15.8033870477762,0.343991424561703,0.423321090232764,0  
.81260166927322,0.416446474200714,0.819130075258902  
"7838","UBXN10",5.39686550223477,-0.818568852934476,1.0076011088242,-0  
.812393759559956,0.416565725889739,0.819225082947726  
"7839","MLH1",79.6118638278523,0.174889383870994,0.215298543488038,0.8  
12311040463269,0.416613177047622,0.819225082947726  
"7840","ARSJ",19.2806393177925,0.474742310306208,0.584685640439401,0.8  
11961637965713,0.416813644214013,0.819225082947726  
"7841","CHD1",275.386562393869,-0.246208853031302,0.303215771589265,-0  
.811992238203279,0.416796085275349,0.819225082947726  
"7842","YAE1",74.843738913588,0.190676986544065,0.234764722129214,0.81  
2204597073648,0.416674242150545,0.819225082947726  
"7843","JDP2",943.312227043954,-0.155664870478827,0.191672610401232,-0  
.812139356546407,0.416711672349849,0.819225082947726  
"7844","MIPOL1",49.818296945483,-0.249815299489853,0.307711791019167,-  
0.811848316447167,0.416878673835194,0.819248439210799  
"7845","GMNN",85.1119553427215,-0.193074959407696,0.23791433763782,-0.  
811531416410963,0.417060558869389,0.819501404075414  
"7846","AL732509.1",9.67435587660868,0.399782603338424,0.4928812060959  
86,0.811113506447167,0.417300490158832,0.819868347667396  
"7847","NOP56",266.513437923518,0.17058092827486,0.210339688542806,0.8  
10978324902035,0.417378118265599,0.819916362057373  
"7848","TRIT1",38.8158366778437,-0.271900228339891,0.335344016016207,-  
0.810809841099863,0.417474882133165,0.819927415648916  
"7849","TTF2",54.9491178374368,0.222572542448659,0.274575740116505,0.8  
10605271806675,0.417592388443344,0.819927415648916  
"7850","ASAP1",248.154337841135,0.225006804411878,0.277581212302861,0.  
810598104047401,0.417596506017492,0.819927415648916  
"7851","UNC45A",139.670783199122,-0.136582295595732,0.16846918696833,-  
0.810725676627188,0.417523224549502,0.819927415648916  
"7852","HMCN1",365.459214910153,0.283911242218774,0.3505056796669,0.81  
0004683771705,0.417937483807692,0.82007886846279  
"7853","TRIM56",372.987130222824,0.238895322358647,0.294881622265759,0  
.810139745308863,0.417859863378441,0.82007886846279  
"7854","MAPRE2",148.1120123854,-0.134797741489109,0.166359327246896,-0

.810280636017804,0.417778901950219,0.82007886846279  
"7855","HNRNPM",623.130481741245,-0.148379997718429,0.183184972580271,  
-0.810000927632914,0.417939642597709,0.82007886846279  
"7856","TSR2",189.080857822103,-0.186584147565309,0.230309078906826,-0  
.810146731735196,0.417855848481072,0.82007886846279  
"7857","EGFL6",3.53492807413514,1.17058978520253,1.44547592720745,0.80  
9830010427098,0.418037881901365,0.820167232978178  
"7858","SLC66A3",492.509631012557,-0.184169172520554,0.22757228163183,  
-0.80927769937512,0.418355430638238,0.820581367004509  
"7859","YJEFN3",15.0435187177509,0.372368566388519,0.460097424776494,0  
.809325473989358,0.418327957230822,0.820581367004509  
"7860","ZNF347",57.8077673497638,0.260834212337293,0.322349894001263,0  
.809164877021088,0.418420314802642,0.820604217898567  
"7861","TSHZ3",66.8293797135853,0.192457585249254,0.237879960995202,0.  
809053374836967,0.418484445557099,0.820625585582328  
"7862","D2HGDH",89.1413380450949,0.192534431349706,0.23814661621682,0.  
808470153421847,0.418819981051699,0.820779690707645  
"7863","ELF2",411.082508452041,-0.157295259638476,0.194506630510287,-0  
.808688419648281,0.418694390885643,0.820779690707645  
"7864","SGK3",77.1383933382618,0.195399573672745,0.241672825064083,0.8  
08529356252331,0.418785913612242,0.820779690707645  
"7865","MRPL43",481.517678328398,-0.198200286898852,0.245085783837357,  
-0.808697606999439,0.418689104979204,0.820779690707645  
"7866","PDCD7",322.826762716143,-0.114106170221565,0.141141198161217,-  
0.808454028364052,0.418829260272873,0.820779690707645  
"7867","UTP20",65.530553377847,0.203009946573844,0.251139913210797,0.8  
08353972804974,0.41888684029996,0.820788183961343  
"7868","POGLUT1",82.5008675583144,-0.169772452815548,0.210067152769851  
, -0.808181815086292,0.418985924617352,0.820877990337631  
"7869","BBS12",17.6188007021919,-0.331142224873362,0.409925908783679,-  
0.807809942669685,0.419200000555781,0.821088692321138  
"7870","ZNF441",42.4473549471132,0.270056533429298,0.334271741897122,0  
.807895192984672,0.419150918791188,0.821088692321138  
"7871","PIK3CB",26.7180618034848,-0.278024293516842,0.344311532192811,  
-0.807478889092659,0.419390632413364,0.821357718034812  
"7872","CENPW",60.7367852897584,0.298338154657854,0.369571917700507,0.  
807253312194627,0.419520556424318,0.821507796910678  
"7873","SHOX2",226.382193252241,-0.174876671419416,0.216795727100624,-  
0.806642611264421,0.41987241646994,0.821586330038842  
"7874","LXN",202.453038872404,0.279109273704699,0.346098884648976,0.80  
6443724855629,0.419987043834322,0.821586330038842  
"7875","FUCA2",412.881043865185,-0.203472838128601,0.252275213909742,-  
0.806551047862351,0.419925186376442,0.821586330038842  
"7876","UBR5-  
AS1",9.06815661615448,0.422767464790513,0.523955517414201,0.8068766350  
18435,0.419737561389331,0.821586330038842  
"7877","KCTD21-  
AS1",12.8210003268096,0.422188677861058,0.523490094241079,0.8064883796  
3805,0.41996130563325,0.821586330038842  
"7878","RPS17",3924.68149974993,0.184114006641185,0.228257363690747,0.



806607084495337,0.419892890828387,0.821586330038842  
"7879","MIEN1",237.23025826692,-0.227273608807389,0.281632509817822,-0  
.806986412734823,0.419674311273036,0.821586330038842  
"7880","H1F0",360.002178734828,-0.154743740334546,0.191739270838631,-0  
.807052930042582,0.419635989031249,0.821586330038842  
"7881","FARP1-  
AS1",2.95531043883475,0.973445737596161,1.20726386700687,0.80632392321  
1249,0.420056099893248,0.82161715262713  
"7882","RAP1GDS1",57.987709466443,-0.183879239119621,0.228238641758757  
,-0.805644643267625,0.420447776547931,0.822103046413316  
"7883","B4GALT1-  
AS1",28.1101081977114,-0.33731949672831,0.418659205193424,-0.805713794  
283982,0.420407893877625,0.822103046413316  
"7884","CHD2",347.379958391694,0.164036252674807,0.203616025175563,0.8  
0561563135009,0.420464509758195,0.822103046413316  
"7885","IP011",34.0160936185526,0.227982678046345,0.2830803931868,0.80  
536371834097,0.420609822122839,0.822178595995887  
"7886","DMWD",120.494084267304,0.175682528852828,0.218136987917396,0.8  
05377073049874,0.42060211791263,0.822178595995887  
"7887","LINC02018",7.644856550187,-0.442290087326785,0.549451913363398  
,-0.80496596075053,0.420839322847279,0.822333740820431  
"7888","ZFYE16",249.173501688879,0.152566266661177,0.189557137222818,  
0.804856355695227,0.420902576391385,0.822333740820431  
"7889","DELE1",79.5529290527919,0.199220666827405,0.247498817210724,0.  
804935833926775,0.420856708609417,0.822333740820431  
"7890","ALOX12-  
AS1",44.9186453365382,0.227864581100327,0.28306306892707,0.80499579815  
9158,0.420822104518062,0.822333740820431  
"7891","YIPF1",57.4828492283563,0.195816917613881,0.243392708756929,0.  
804530746274078,0.42109051988631,0.822356993893131  
"7892","KDM6B",172.739083070808,-0.295732617740513,0.367655777555041,-  
0.804373644573664,0.42118121743667,0.822356993893131  
"7893","SNHG11",52.6640027071351,-0.254993221052697,0.316983889435022,  
-0.804435902112205,0.421145273703197,0.822356993893131  
"7894","B4GALT5",154.409303235456,-0.163168609457853,0.202766132340077  
,-0.804713329463663,0.42098512583056,0.822356993893131  
"7895","SCARF2",28.5070562688245,-0.446134278943443,0.554609434236258,  
-0.804411629884743,0.421159286803719,0.822356993893131  
"7896","VPS72",144.040310633133,-0.191403185403523,0.238018310246327,-  
0.80415319815286,0.421308504324353,0.822397188066342  
"7897","SLC37A1",17.3601374213138,0.30735584797912,0.382209910268996,0.  
.804154575067939,0.421307709216526,0.822397188066342  
"7898","ALKBH1",18.8397487154862,0.29824194056183,0.370975571084644,0.  
803939568553911,0.421431876674901,0.822533854006534  
"7899","CRYZ",71.6904099303957,0.192363271217068,0.239431777859446,0.8  
03415791073444,0.421734450916861,0.822989909530451  
"7900","DCTN6",292.541582495335,-0.21625924968836,0.269196714854743,-0  
.803350255611598,0.421772318215411,0.822989909530451  
"7901","LYSMD1",21.9688431591139,0.299428929613822,0.372845500771869,0.  
.803091170455165,0.421922040731235,0.823177858229589

"7902", "ERVK13-1", 24.2107184666853, 0.340650541949813, 0.424284394115876, 0.802882563379831, 0.422042615150874, 0.8233088980702  
"7903", "RPTOR", 31.4064322861672, -0.245560338948739, 0.305923677244808, -0.802684974109523, 0.422156839928527, 0.823427519612583  
"7904", "GGT7", 76.8926996017729, 0.177850847677303, 0.221650046907377, 0.802394811816231, 0.422324613269014, 0.823650545741631  
"7905", "ERI2", 26.9713949399842, 0.312435239669503, 0.389433111676466, 0.802282164257949, 0.422389757197987, 0.823673384845917  
"7906", "ZC3H7A", 172.375138128004, 0.160694124459893, 0.200322683485157, 0.802176376954333, 0.422450939211806, 0.823688493289905  
"7907", "UBIAD1", 54.1046556410453, -0.191654896206785, 0.238979054621252, -0.801973614426296, 0.422568221292477, 0.823812967146015  
"7908", "ARL1", 635.022166748594, -0.163102947069314, 0.203417033938875, -0.801815580097016, 0.422659644874828, 0.823887003761441  
"7909", "AC015917.2", 2.87424079072375, -0.719326570832576, 0.897549039085222, -0.801434283262907, 0.422880274533573, 0.824212850162476  
"7910", "PHACTR4", 168.395070669986, -0.16007681894759, 0.19986784043131, -0.800913336543527, 0.423181818755034, 0.824405414111661  
"7911", "TBC1D8", 25.0427753937282, 0.347537247339669, 0.434086800379464, 0.80061694351421, 0.423353438735512, 0.824405414111661  
"7912", "AP1AR", 69.7387612576167, -0.237981451070785, 0.297054610388522, -0.801137039278822, 0.423052315493462, 0.824405414111661  
"7913", "FBXW11", 176.637263715261, 0.167173398705677, 0.208724193558655, 0.800929666347942, 0.423172364518501, 0.824405414111661  
"7914", "PDLIM2", 1183.97812191983, -0.208466810081512, 0.26035205286973, -0.800711220763144, 0.423298845113721, 0.824405414111661  
"7915", "AL627171.1", 5.70350615376184, -0.538642925208764, 0.672569253305544, -0.800873549543697, 0.423204854190789, 0.824405414111661  
"7916", "ARSD", 79.5182994704689, 0.246378938331187, 0.307724778568429, 0.800647057014291, 0.423336000304905, 0.824405414111661  
"7917", "AC005726.5", 3.34981171614808, 0.768677601112939, 0.960438222835994, 0.800340493366849, 0.423513547932352, 0.824613027835949  
"7918", "LINC01117", 19.5740112229945, -0.396226440562196, 0.495147490647188, -0.800219021698573, 0.423583910812582, 0.824645868297039  
"7919", "ZBTB43", 127.826611617272, 0.245997182649703, 0.307493356942846, 0.800008120810968, 0.423706092121399, 0.824779569396561  
"7920", "SPARCL1", 343.508802417655, -0.765819510950648, 0.957500957798863, -0.799810699627017, 0.423820482909325, 0.824858729616318  
"7921", "AL158212.3", 13.4637657751276, 0.340876599840581, 0.426255561787808, 0.799700063527313, 0.423884596139819, 0.824858729616318  
"7922", "USP3-AS1", 4.6977792189665, 0.547008098063422, 0.684050068578233, 0.799660906694086, 0.423907288746057, 0.824858729616318  
"7923", "AC092958.1", 7.07210774529498, 0.605842862329962, 0.757969600960464, 0.799297045108757, 0.424118191862478, 0.82516495362364  
"7924", "TMCC1", 82.5894768548445, 0.217073678200882, 0.271665715951423, 0.79904701055358, 0.424263153597385, 0.825238676681853  
"7925", "HMGCS1", 120.204764933815, 0.247701306313337, 0.309975112857416, 0.799100624659749, 0.424232067478776, 0.825238676681853  
"7926", "SSB", 724.920139875508, -0.144788136070348, 0.181233038434346, -0.

798905858011089,0.424345001947239,0.825293742747501  
"7927","AC069185.1",5.55343842563645,0.540866761406851,0.6771147492556  
66,0.798781538877142,0.424417096965001,0.825313173954326  
"7928","AC037459.2",8.16007621197946,0.423930338873296,0.5308341318968  
49,0.798611681879705,0.424515611825096,0.825313173954326  
"7929","REX04",140.648218875614,0.161968779502076,0.202811466903648,0.  
798617464657584,0.424512257669015,0.825313173954326  
"7930","STRN",202.176956521682,0.135309793614963,0.169485854403926,0.7  
98354494484751,0.424664802622718,0.82540469202319  
"7931","AC090198.1",4.49933679822544,-0.56231436082334,0.7043492634297  
53,-0.798345920155025,0.424669776998762,0.82540469202319  
"7932","C17orf100",8.15849360519622,0.424829732415498,0.53221250193331  
3,0.798233282518285,0.424735126605019,0.825427631948609  
"7933","SLC7A2",36.4434666744851,-0.361800741795644,0.45362954604117,-  
0.797568731915906,0.425120802226892,0.825440005073638  
"7934","TRIM68",18.5133038473166,0.308940644205458,0.38721886880414,0.  
797845015041671,0.424960434948252,0.825440005073638  
"7935","TSPAN31",239.293051780331,0.145290750142482,0.182101515923914,  
0.797855797110374,0.424954177262297,0.825440005073638  
"7936","ERH",923.915029614942,-0.206297036543844,0.258535156828446,-0.  
79794577679327,0.424901957045568,0.825440005073638  
"7937","PDPK1",165.104485945372,0.139040164679375,0.17431697000265,0.7  
97628393134992,0.425086169152713,0.825440005073638  
"7938","SIAH1",184.090724940752,-0.174843265989492,0.219209773753543,-  
0.79760707287654,0.425098545279343,0.825440005073638  
"7939","AC022098.1",15.21143843600098,-0.318854287000222,0.399653433746  
473,-0.797826967258067,0.424970909622824,0.825440005073638  
"7940","MACROD2",6.80074682115302,0.60252333120721,0.755530118423807,0.  
797484198861853,0.425169876113181,0.825440005073638  
"7941","AC025181.2",50.8249941367983,-0.282387672111475,0.354248046437  
154,-0.797146730805112,0.425365819060066,0.825592948577315  
"7942","ILK",556.75801194208,-0.176709423568778,0.221723901175012,-0.7  
96979588724164,0.42546288572807,0.825592948577315  
"7943","NSMCE1",317.858180973175,0.186235977453095,0.233660226208894,0.  
797037563794013,0.425429215621444,0.825592948577315  
"7944","UBE2Z",217.180906994639,0.164698597475512,0.206596831400131,0.  
797198080722391,0.425336000528928,0.825592948577315  
"7945","CHI3L1",335.365763336686,-1.01249861737601,1.27064180972966,-0.  
796840313000109,0.425543779068878,0.825645456865103  
"7946","CCNT1",113.163447857076,0.171451204392875,0.215188592957535,0.  
796748573130492,0.425597067807338,0.825645456865103  
"7947","DNAJB14",305.279554229913,0.125865359151399,0.158064293645637,  
0.796292168511982,0.425862236455304,0.825951984770825  
"7948","RNFT1-  
DT",14.2693146444709,-0.43999592301237,0.552516493653019,-0.7963489381  
16384,0.425829248368703,0.825951984770825  
"7949","CARM1",160.053901863521,0.16666255557452,0.209386361139204,0.7  
9595707508246,0.426056985314309,0.82622574268714  
"7950","NSFL1C",287.012682276918,-0.139392569889213,0.175155068439105,  
-0.795823787067145,0.426134463790675,0.826244786239205

"7951", "RBM39", 1463.36898053557, 0.132671494030838, 0.166723886118694, 0.795755767931098, 0.426174005539275, 0.826244786239205  
"7952", "HECTD3", 80.8904712921535, 0.175291324565208, 0.220394551541954, 0.795352350313614, 0.426408569384387, 0.826283858838506  
"7953", "VPS33A", 56.9617604519881, 0.186537376616106, 0.234517406563847, 0.795409515008948, 0.426375326866139, 0.826283858838506  
"7954", "ARF6", 470.007283449243, -0.154065620054642, 0.193693330486313, -0.795410041573574, 0.42637502066434, 0.826283858838506  
"7955", "F8A3", 12.1440752150335, -0.454028090007274, 0.570816950966333, -0.795400503153686, 0.426380567356346, 0.826283858838506  
"7956", "GINM1", 794.103778613789, -0.103164089596906, 0.129769846583353, -0.794977356551334, 0.426626673919133, 0.826498702835672  
"7957", "LRRC28", 65.0705903526558, -0.220321432039828, 0.27712845806364, -0.795015544701775, 0.426604459885414, 0.826498702835672  
"7958", "SUGT1", 374.631377436044, -0.132634234262009, 0.166878750806847, -0.79479402632589, 0.426733326436955, 0.826601435916771  
"7959", "KCTD18", 78.3998327505579, -0.187057004371466, 0.235464767754576, -0.794416108003196, 0.426953229787369, 0.826715743898039  
"7960", "ARL4A", 276.824505657205, -0.274988073303668, 0.346086171259647, -0.794565331237584, 0.426866391788806, 0.826715743898039  
"7961", "AC078846.1", 16.9724252954777, 0.334052165472677, 0.420489863461837, 0.794435715340365, 0.426941819033594, 0.826715743898039  
"7962", "LSMEM1", 25.7509078954873, -0.372634752449848, 0.469220243822822, -0.794157450270955, 0.427103775773496, 0.826799535796615  
"7963", "TEPSIN", 29.9601741178876, 0.262457667861426, 0.330458257586932, 0.794223360547685, 0.427065411224847, 0.826799535796615  
"7964", "ZNF551", 14.4880303666355, 0.361756635124139, 0.455601022110833, 0.794020683816937, 0.427183390149517, 0.826849819080212  
"7965", "DNAH14", 16.3458365500687, -0.368908320450184, 0.464871940313079, -0.79356977364935, 0.427445934847707, 0.827150274375772  
"7966", "NDUFB3", 414.285215574266, -0.219184026611799, 0.276185533353142, -0.793611540585442, 0.427421611891464, 0.827150274375772  
"7967", "ARID2", 113.075277445079, 0.209561493331798, 0.264132369458586, 0.793395727155114, 0.427547299423713, 0.827242578212192  
"7968", "KLHL15", 55.7391816297419, 0.283141748113518, 0.356931304469136, 0.793266784303592, 0.427622404691593, 0.827284057269191  
"7969", "CCBE1", 81.4282802635914, -0.729833328842356, 0.920353203962786, -0.792992652929218, 0.427782103362207, 0.827347116010367  
"7970", "PNMA8B", 28.3025486207007, 0.328064376239861, 0.413651216351295, 0.79309418967416, 0.42772294780925, 0.827347116010367  
"7971", "JOSD1", 180.221320516464, 0.153985927690308, 0.194197550115721, 0.792934450504393, 0.427816014383304, 0.827347116010367  
"7972", "AL353801.3", 3.06867625641294, 0.820375846466598, 1.03491557117638, 0.792698331453343, 0.427953602679205, 0.827405592035613  
"7973", "AL049838.1", 11.014969442471, -0.365882479569139, 0.461557607081316, -0.792712489092783, 0.427945352193419, 0.827405592035613  
"7974", "NASP", 427.07359895379, 0.209083765179105, 0.263813743138753, 0.792543112771562, 0.428044063769361, 0.827461489876124  
"7975", "AL161729.1", 7.67736262909742, -0.471922067550125, 0.595511920433353, -0.792464518941465, 0.42808987231671, 0.827461489876124

"7976", "HERPUD2", 151.499073496557, -0.15287082202397, 0.193010944977792, -0.792031882137873, 0.428342086490882, 0.827845193487581  
"7977", "MRPS27", 101.769815882602, -0.178209861770237, 0.225040848011016, -0.791900063234357, 0.428418950107119, 0.827889948088409  
"7978", "ZNF175", 25.5109842923962, 0.284408481139252, 0.359294639321697, 0.791574518551625, 0.428608809621975, 0.828153020847674  
"7979", "ZNF362", 85.2474472641922, 0.178207890231364, 0.225282951440179, 0.791040285525935, 0.428920483401424, 0.828367418162767  
"7980", "NUDCD2", 303.196660024559, -0.192355557511409, 0.243177801643191, -0.791007880701415, 0.428939392749632, 0.828367418162767  
"7981", "HIST1H3A", 3.28445074515923, 0.707960103576335, 0.895148542438403, 0.790885612847939, 0.429010744682064, 0.828367418162767  
"7982", "PPP2R5D", 101.205624813611, 0.166411622453472, 0.21047509195384, 0.790647581662388, 0.429149672490941, 0.828367418162767  
"7983", "TP53TG1", 222.953289314092, -0.230048397209056, 0.290928688168574, -0.790738096876022, 0.42909683986015, 0.828367418162767  
"7984", "PPDPFL", 35.2031180323063, 0.449343602347441, 0.568199102156348, 0.790820683528286, 0.429048638333304, 0.828367418162767  
"7985", "DNAJC3-DT", 13.501511245603, 0.359510342684174, 0.454339230389304, 0.791281753011124, 0.428779593943806, 0.828367418162767  
"7986", "AC093462.1", 3.25448256499078, -0.660009798528411, 0.834258170955112, -0.791133753922709, 0.428865944038984, 0.828367418162767  
"7987", "RAMAC", 97.0552761407701, -0.258229831039282, 0.326673684700184, -0.790482500224286, 0.429246038257642, 0.828449690715106  
"7988", "HSPG2", 1886.35804237388, 0.138377425991125, 0.175098485950514, 0.790283395312923, 0.429362281849978, 0.828476289757066  
"7989", "ABCD4", 156.210422443069, 0.154610640561811, 0.195641621940671, 0.79027478421078, 0.429367309689861, 0.828476289757066  
"7990", "AC083799.1", 17.3334653898521, -0.34685696315864, 0.439107006172885, -0.789914436077286, 0.429577739993772, 0.828674866975847  
"7991", "CACFD1", 14.6025421570329, -0.341616496685119, 0.432469709263918, -0.789920055364258, 0.429574458073163, 0.828674866975847  
"7992", "EXOC8", 41.2326470579224, 0.211045915713934, 0.267330829800192, 0.789455955647441, 0.429845562614268, 0.82896635524637  
"7993", "PRKN", 22.9826408602512, 0.312257890550865, 0.395804502940127, 0.788919499983809, 0.430159057775914, 0.82896635524637  
"7994", "IDE", 59.9711306427525, 0.216456121276042, 0.274317999177216, 0.789070064397073, 0.430071057209447, 0.82896635524637  
"7995", "ITFG2", 69.9822443850402, 0.210328647536147, 0.266505877620565, 0.789208288440076, 0.429990278438444, 0.82896635524637  
"7996", "NFYB", 312.551795522971, -0.167944447754029, 0.212875520440989, -0.788932646675947, 0.430151373496162, 0.82896635524637  
"7997", "NXN", 37.6976183371245, 0.275460661749502, 0.349071171295777, 0.789124638184736, 0.430039162982485, 0.82896635524637  
"7998", "ZNF544", 21.2065312327756, 0.356924807870996, 0.452307825043985, 0.789119241605617, 0.430042316811219, 0.82896635524637  
"7999", "PRAF2", 145.47817479748, -0.215900203234954, 0.273537760417045, -0.789288480339187, 0.429943417960038, 0.82896635524637  
"8000", "RABEPK", 99.7510475315502, -0.174583113290865, 0.221333692469424,

-0.788777846440993,0.430241859738964,0.829022283484516  
"8001","TTC21A",13.8869502503931,-0.372245122533275,0.472091649645108,  
-0.788501814876642,0.430403237422411,0.829023665006137  
"8002","DCAKD",62.9008474214473,-0.206819647537188,0.262294834073508,-  
0.788500651443355,0.430403917680449,0.829023665006137  
"8003","DHR SX",142.74307393053,-0.212647077964305,0.269654717490743,-0  
.78859023844671,0.430351538093914,0.829023665006137  
"8004","PPM1D",48.2577835261282,-0.229174968396063,0.290685886130338,-  
0.788393862003005,0.430466359994626,0.829040347241024  
"8005","PTPN22",3.0225690887201,0.761449501372024,0.966120044211373,0.  
788152058260608,0.430607767797071,0.829119958292027  
"8006","SRGAP3",12.2242025201068,0.458326971081719,0.581530461888507,0  
.788139231078821,0.430615269937462,0.829119958292027  
"8007","RCC2",75.9267888203743,0.189146441819546,0.240103521166897,0.7  
87770378794527,0.430831030332171,0.829141205204921  
"8008","IAH1",512.150283577847,-0.200804802232021,0.255070022456253,-0  
.787253634505251,0.431133405707467,0.829141205204921  
"8009","SLC7A14-  
AS1",3.1439740448086,0.956569570895176,1.21514938433535,0.787203271652  
389,0.431162882350424,0.829141205204921  
"8010","HLA-  
B",5107.63763964928,0.328484726722075,0.417116666790252,0.787512830042  
953,0.430981720826443,0.829141205204921  
"8011","ATP6V1G2",5.04097921452636,0.591050236468508,0.750322118228295  
,0.787728659611062,0.430855437944223,0.829141205204921  
"8012","TMEM60",153.540649089227,0.183803253732371,0.233329625440734,0  
.787740748244834,0.430848365463356,0.829141205204921  
"8013","PRPF39",60.9360894109409,0.201921001278481,0.256504995753664,0  
.787201047235731,0.431164184295988,0.829141205204921  
"8014","RGMA",189.199583361342,-0.172606988796374,0.219046522061469,-0  
.787992373364128,0.430701166944284,0.829141205204921  
"8015","AC087477.2",23.6165052554373,0.281972402968199,0.3581703723691  
18,0.78725775418858,0.431130994568631,0.829141205204921  
"8016","IER3IP1",470.340329868651,-0.18369784509773,0.233291106427077,  
-0.787418980136522,0.431036639538942,0.829141205204921  
"8017","AC007529.1",6.58796369303338,0.53698025281003,0.68235371148572  
9,0.786952930380977,0.431309420785636,0.829317041463213  
"8018","PSPC1",110.804798507395,0.150571202834204,0.191395042585312,0.  
786703776651316,0.431455292754527,0.829494055601276  
"8019","STK40",108.080877582035,-0.171154728360928,0.218030009166308,-  
0.785005371578805,0.432450419182709,0.829497039365858  
"8020","NAV1",772.974936069177,0.195201387107334,0.249015872454051,0.7  
83891344690702,0.433103868889876,0.829497039365858  
"8021","LINC01703",3.5298446179728,0.673434199213764,0.860960518201514  
,0.782189409359352,0.434103267589118,0.829497039365858  
"8022","RNASEH1",175.411767892578,-0.171932959032593,0.219494384822133  
, -0.783313701495914,0.43344291921664,0.829497039365858  
"8023","HS1BP3",108.378223949959,0.159125150889404,0.202361530006912,0  
.786340916101835,0.431667787772622,0.829497039365858  
"8024","IL1RL1",2.58915466987375,-0.988972971536522,1.25789871331937,-

0.786210337179531,0.431744271023886,0.829497039365858  
"8025","CHCHD5",254.334119764514,-0.19110510558731,0.244159905602965,-  
0.782704699673629,0.433800541801202,0.829497039365858  
"8026","ORC2",48.2477065460267,0.240294212933331,0.307146416478312,0.7  
82344185188624,0.434012326149088,0.829497039365858  
"8027","AC012076.1",3.12494652151182,-0.941971947481999,1.204532674800  
64,-0.782022743914277,0.43420120730737,0.829497039365858  
"8028","UBE2E1",303.577583522517,-0.140455880189283,0.179516818221606,  
-0.782410704360283,0.433973244945843,0.829497039365858  
"8029","NDUFB5",551.036662628909,-0.204601474185653,0.260482154193677,  
-0.785472136542319,0.432176800755527,0.829497039365858  
"8030","PGRMC2",611.856001166705,0.118403405057689,0.150869179473995,0.  
.784808437816806,0.432565892173992,0.829497039365858  
"8031","C5orf34",8.56817614088917,0.501521490700271,0.641240547844127,  
0.782111319046189,0.43414915519559,0.829497039365858  
"8032","PCBD2",40.2614106442822,0.236455078112125,0.30194563289122,0.7  
8310481210805,0.433565565582964,0.829497039365858  
"8033","TRIM41",36.6173365500448,0.23318132225403,0.296682085808483,0.  
785963606864202,0.431888808407172,0.829497039365858  
"8034","MCUR1",171.420346917142,-0.194135073790278,0.247889647919447,-  
0.783151194169122,0.433538331297288,0.829497039365858  
"8035","ZNF391",14.3254737275073,0.344458509604347,0.439662100814814,0.  
.783461910785511,0.43335591245694,0.829497039365858  
"8036","FLT1",474.260679906712,-0.138799632274033,0.177230858541883,-  
0.783157252726572,0.433534773950062,0.829497039365858  
"8037","TBC1D32",29.355867649856,0.298231568468901,0.379464487994201,0.  
.785927479130692,0.431909974791128,0.829497039365858  
"8038","TOMM7",3146.54848929419,-0.174978912546029,0.223351372639848,-  
0.783424388567251,0.433377939045784,0.829497039365858  
"8039","ZNF107",55.0485060713919,0.213825246057567,0.272347599185222,0.  
.785118894740633,0.43238386248006,0.829497039365858  
"8040","EIF4H",603.154417448207,-0.100669024686153,0.128527613215553,-  
0.783248223222832,0.433481361673385,0.829497039365858  
"8041","MRPS28",148.094614832426,-0.208747209963228,0.265621025944615,  
-0.785883606995608,0.431935679244721,0.829497039365858  
"8042","EIF3E",2224.97291831145,-0.199239172263931,0.253893802020142,-  
0.784734289213272,0.432609374164288,0.829497039365858  
"8043","LINC01235",17.0665962877412,0.495622912913465,0.63340697415413  
,0.782471512214298,0.433937521023364,0.829497039365858  
"8044","ZCCHC7",193.733722795005,-0.133846424712481,0.170372584468287,  
-0.785610109338893,0.432095940068669,0.829497039365858  
"8045","GNAQ",308.628257716116,0.162311156742927,0.207170182697215,0.7  
83467749218281,0.433352485192249,0.829497039365858  
"8046","BICD2",151.168752439033,0.151680011523873,0.193721115995263,0.  
782981301468354,0.433638092498117,0.829497039365858  
"8047","SEC24C",75.1904872853264,0.165962158134438,0.211346486447276,0.  
.785261022902504,0.432300543513733,0.829497039365858  
"8048","AP002748.4",13.8979249279116,-0.398596315256535,0.507917223856  
691,-0.784766289731099,0.432590608211169,0.829497039365858  
"8049","CD3D",14.9946957340581,0.439314651851417,0.561748964925537,0.7

82047995245796,0.43418636772826,0.829497039365858  
"8050","AACS",71.042496944388,0.227114242836766,0.290406988825258,0.78  
2055017875014,0.434182240755921,0.829497039365858  
"8051","HNRNPA1L2",20.3479070518814,0.31682711077618,0.40298637387311,  
0.786198073476155,0.431751454576659,0.829497039365858  
"8052","OBI1",82.85500191467,0.22979900999195,0.293372841910757,0.7833  
00214482204,0.433450837314654,0.829497039365858  
"8053","ABHD4",63.2244995430805,0.245804666027327,0.313076552523793,0.  
785126398147131,0.432379463569196,0.829497039365858  
"8054","KLHL28",114.436624377766,0.152923011075961,0.195164927421024,0.  
.783557850771334,0.433299595953345,0.829497039365858  
"8055","CBFB",112.71461888545,0.154698802896932,0.197562698011493,0.78  
3036496535053,0.433605680432235,0.829497039365858  
"8056","CYB5B",169.490202180705,0.165076973699826,0.21101828479677,0.7  
82287534271308,0.434045611180046,0.829497039365858  
"8057","SPATA2L",36.1398847129702,-0.251257355553972,0.320415650711127  
, -0.784160683151194,0.432945831909747,0.829497039365858  
"8058","ZNF276",66.0638260720519,0.225813109918294,0.288260721567973,0.  
.783364131921965,0.433413312732311,0.829497039365858  
"8059","COX10-  
AS1",25.2309155920061,0.317994058643805,0.405057635359197,0.7850587938  
22796,0.432419097889038,0.829497039365858  
"8060","TTYH2",10.1740947442295,0.378712379537729,0.481714638521879,0.  
786175775558308,0.431764515920437,0.829497039365858  
"8061","AC027307.2",19.1342317968291,0.296665530183577,0.3775145858977  
36,0.785838590787431,0.431962054925964,0.829497039365858  
"8062","CLPP",238.988221897302,-0.1801486957032,0.229750261316159,-0.7  
84106597621222,0.432977564446364,0.829497039365858  
"8063","HAUS8",23.5794818410292,-0.268076118872687,0.341641779268527,-  
0.784670187137685,0.432646966740504,0.829497039365858  
"8064","MEF2B",23.9924396108099,-0.283311930136227,0.360388211532364,-  
0.786129848508612,0.431791419108283,0.829497039365858  
"8065","PLCG1-  
AS1",9.93845777261187,0.577884077617744,0.736777691902456,0.7843398137  
17178,0.432840743774687,0.829497039365858  
"8066","RPL3",14623.0012439845,-0.19868300230858,0.253919718146377,-0.  
7824638581004,0.433942017634696,0.829497039365858  
"8067","PMM1",249.817880207365,-0.191444876310132,0.24388505827748,-0.  
784979931375358,0.432465335155699,0.829497039365858  
"8068","PRPS1",91.9252839448036,-0.164496656942525,0.210009151874218,-  
0.783283278249929,0.433460780534695,0.829497039365858  
"8069","FAM122B",48.6303421305542,0.219654091891011,0.279883981596144,  
0.784804084315048,0.432568445070849,0.829497039365858  
"8070","TMED9",739.641048185952,-0.184463511676843,0.235911908065559,-  
0.781916916315989,0.434263402740727,0.829513054925441  
"8071","AC096751.2",2.5099765131011,-0.877462893487501,1.1226881666013  
8,-0.781573120293744,0.434465488979625,0.829796247382099  
"8072","ZC3H11A",7.69272515932468,0.5330103700682,0.682256902142259,0.  
781245845068873,0.434657914609155,0.829876998587774  
"8073","BICD1",53.8069038435098,0.226678924322448,0.290126736169794,0.



781310014082212,0.434620181743543,0.829876998587774  
"8074","FARSA",72.4002567293936,-0.201544485463246,0.257984693419015,-  
0.78122652469114,0.434669275809127,0.829876998587774  
"8075","DX0",33.0437164689773,-0.24593959752695,0.314988093194389,-0.7  
8079014045516,0.434925933888062,0.830073037583508  
"8076","Z97989.1",20.9747137462744,0.317927423094306,0.407123931836561  
,0.780910671745863,0.434855035027533,0.830073037583508  
"8077","AP002387.2",10.4376061414139,-0.383393470276635,0.491040764226  
354,-0.780777275957281,0.434933501431203,0.830073037583508  
"8078","RWDD3",142.727867958199,-0.184420640724329,0.236302890468633,-  
0.780441747278621,0.435130903078873,0.830346975855513  
"8079","ALPK3",7.76768030705184,-0.611935275210082,0.784630144364122,-  
0.779902836521792,0.435448068739325,0.83084103644209  
"8080","CD3EAP",26.0943847299639,0.27131434826043,0.347919782263107,0.  
779818688364361,0.435497604570359,0.83084103644209  
"8081","RPS27",22755.187890988,-0.222533039779933,0.285732260632806,-0  
.778816642149871,0.43608773290056,0.831079178784918  
"8082","AC004067.1",2.87653149608761,0.680538402422908,0.8730310775649  
21,0.779512230333291,0.435678035915835,0.831079178784918  
"8083","ABLIM3",40.8469336940176,0.233567557260111,0.29997973177645,0.  
778611127748356,0.436208822056618,0.831079178784918  
"8084","POR",180.366078644895,-0.163650060731186,0.210185071912052,-0.  
77859982748757,0.436215480736216,0.831079178784918  
"8085","NDUFA9",219.764204996162,-0.213178397890584,0.273557256515872,  
-0.779282555344005,0.435813288458599,0.831079178784918  
"8086","REC8",20.1618499672449,-0.428104481933315,0.549601751525301,-0  
.778935803507182,0.436017531863748,0.831079178784918  
"8087","MNS1",95.1937701365631,0.262797524846456,0.337463024385823,0.7  
78744650098315,0.436130148436879,0.831079178784918  
"8088","UBL7",86.1368986078487,-0.19629321356865,0.252027674146934,-0.  
77885579126604,0.436064668425265,0.831079178784918  
"8089","LINC01569",4.83629376010857,0.529276615302216,0.67955659132110  
5,0.77885583343878,0.436064643579818,0.831079178784918  
"8090","MCM3AP-  
AS1",5.63588530036309,0.499554343452434,0.641508704916563,0.7787179497  
70313,0.436145880065987,0.831079178784918  
"8091","Z93943.1",3.43893161100229,0.734789726974357,0.943206624255695  
,0.779033679448759,0.435959875489542,0.831079178784918  
"8092","Z84485.1",8.95271843267482,-0.375847602221561,0.48281045291276  
, -0.778457881253607,0.436299127556145,0.831135819485661  
"8093","TAPBP",469.026400789756,0.120715616719197,0.15510178066593,0.7  
78299360593442,0.436392552366089,0.831179037745956  
"8094","WWP1",165.555502213558,-0.164952620297407,0.211981872514089,-0  
.778144934475208,0.436483575125106,0.831179037745956  
"8095","PTEN",547.335286528661,0.146401628534361,0.188139131897635,0.7  
78156181851719,0.436476945260357,0.831179037745956  
"8096","B4GALT2",177.426569871848,-0.231888655120539,0.298274300220821  
, -0.777434244079577,0.436902615469336,0.83137857190487  
"8097","CAMSAP2",154.963789852144,0.169910942786605,0.218601763124788,  
0.777262453686669,0.437003942023104,0.83137857190487

"8098", "AC012459.1", 3.12708546901638, 0.83751075773634, 1.07836491684447, 0.776648743532089, 0.437366035135667, 0.83137857190487  
"8099", "NXPE3", 34.971346927647, -0.268069289467314, 0.344824862378384, -0.777407080273568, 0.436918636505679, 0.83137857190487  
"8100", "GTPBP8", 89.5500584153588, -0.182786824165953, 0.23538911148075, -0.776530498866775, 0.437435820118432, 0.83137857190487  
"8101", "SLC9A3-AS1", 5.46877004064621, 0.584454058824081, 0.751610446914989, 0.777602361998815, 0.436803468139454, 0.83137857190487  
"8102", "TRAPPC13", 48.4731117904467, -0.214609132355526, 0.276378552588059, -0.77650429219593, 0.437451287494025, 0.83137857190487  
"8103", "JAK2", 59.6107953453192, -0.222617066101203, 0.286294118939752, -0.777581694397471, 0.436815656132467, 0.83137857190487  
"8104", "DNA2", 6.16009578747957, 0.472702904004149, 0.608539869197232, 0.77678214350643, 0.43728731356949, 0.83137857190487  
"8105", "IFITM10", 7.08657029919121, -0.532999880531353, 0.686349518967086, -0.776572090169867, 0.437411273262553, 0.83137857190487  
"8106", "TM7SF3", 220.366746557097, -0.135257042026068, 0.173981225974211, -0.777423203386997, 0.436909127157295, 0.83137857190487  
"8107", "ESYT1", 93.0694323058141, 0.187935048652643, 0.242006314141189, 0.776570848242412, 0.437412006226763, 0.83137857190487  
"8108", "LGR5", 2.64026085932813, -0.782747391770943, 1.00733661820526, -0.777046498285287, 0.437131337471815, 0.83137857190487  
"8109", "VSIG10", 91.5547502588178, 0.225071714348246, 0.289632182617446, 0.777094977202608, 0.437102737143691, 0.83137857190487  
"8110", "ERG28", 99.4932743795106, -0.211027121224996, 0.271599189452111, -0.776979937424317, 0.437170607068907, 0.83137857190487  
"8111", "AJ011932.1", 9.52848525532671, -0.419103932556005, 0.539314037053601, -0.777105552167098, 0.437096498544905, 0.83137857190487  
"8112", "SEC61A1", 321.872511662147, 0.131778995832014, 0.16986575144757, 0.775783197666471, 0.437877006415542, 0.831535385332502  
"8113", "PCDHGC3", 68.0264344629339, -0.212972063818474, 0.274558500651568, -0.7756892003455, 0.437932517993095, 0.831535385332502  
"8114", "LRRN3", 38.6725011887415, -0.694251898374361, 0.89518251983823, -0.775542286616387, 0.438019288284133, 0.831535385332502  
"8115", "STXBP1", 162.104845211598, 0.150312853926225, 0.193660696606219, 0.776166029351142, 0.437650961036464, 0.831535385332502  
"8116", "FAM102A", 146.415710170515, -0.145170576329235, 0.187141594066902, -0.775725872450022, 0.437910860230759, 0.831535385332502  
"8117", "LRP5", 111.898831913555, -0.240631898463918, 0.31007079311014, -0.776054706895413, 0.437716685157154, 0.831535385332502  
"8118", "CLMN", 8.6056713169635, -0.469639338481575, 0.605198456238476, -0.776008817670407, 0.437743779537511, 0.831535385332502  
"8119", "POLR2M", 158.219398057869, 0.149955319256273, 0.193289043456984, 0.775808688243859, 0.437861953256919, 0.831535385332502  
"8120", "AC026471.4", 5.27926340854634, -0.539980088457081, 0.696227180179484, -0.77558030457512, 0.437996833142094, 0.831535385332502  
"8121", "HEXB", 669.387531623571, -0.138474009353366, 0.178610603987312, -0.77528436868845, 0.438171643868169, 0.83161978456388  
"8122", "ZNF230", 25.384247343473, -0.235225614173745, 0.303376683769323, -

0.775358248535021,0.43812799893661,0.83161978456388  
"8123","OTUD6B",43.5474223613322,0.235053699276924,0.303219684851606,0  
.775192743149107,0.438225775639534,0.831620131907351  
"8124","SV2A",3.01740202847175,-1.08938317953561,1.40628631739253,-0.7  
74652477281794,0.438545039363411,0.831765550503143  
"8125","HHAT",11.8957020224902,0.42863763034917,0.554449246812832,0.77  
3087226311748,0.439470760264969,0.831765550503143  
"8126","EML4",101.805378186899,0.184241781481695,0.237937573667972,0.7  
7432823509747,0.438736710621815,0.831765550503143  
"8127","ATP5MC3",1141.45305446808,-0.234556713465872,0.302819175398367  
, -0.774576818516551,0.438589759685007,0.831765550503143  
"8128","COL4A4",14.8140236407815,-1.04701144617314,1.35436764772363,-0  
.773062947813997,0.439485127886852,0.831765550503143  
"8129","NIT2",189.2811831265,-0.220568751910022,0.28505944363939,-0.77  
3764058099576,0.439070330732276,0.831765550503143  
"8130","FRG1",391.073163539059,-0.184064912886312,0.237573770130236,-0  
.774769507531952,0.43847587038066,0.831765550503143  
"8131","MICALL2",39.9223597496023,-0.301469789439293,0.389885875415924  
, -0.773225726932759,0.439388802997106,0.831765550503143  
"8132","UFSP1",5.17344511743072,0.591993443893768,0.76509094306127,0.7  
73755655144855,0.439075300831906,0.831765550503143  
"8133","CHCHD3",242.514144818325,-0.176174311446644,0.227807812229971,  
-0.773346224267308,0.439317506251704,0.831765550503143  
"8134","ACTR3B",14.857290584517,0.325708179840728,0.420700516935841,0.  
774204372775705,0.438809942815799,0.831765550503143  
"8135","DCLRE1A",9.32148445019682,0.368134328983106,0.475500416506184,  
0.774204009510721,0.438810157602433,0.831765550503143  
"8136","MYCBP2",810.123965419531,0.150506753080849,0.194260716704728,0  
.774766796055922,0.438477472887135,0.831765550503143  
"8137","GEMIN2",75.5783224118408,-0.192701362531295,0.248891477455723,  
-0.774238493423608,0.438789768668561,0.831765550503143  
"8138","DICER1-  
AS1",11.3679249375727,0.352021845219751,0.455332718449034,0.7731090496  
17205,0.439457845816276,0.831765550503143  
"8139","ZNF207",390.148181619473,0.155322342512411,0.200882443569371,0  
.773200184907018,0.439403916743299,0.831765550503143  
"8140","PRDX2",1023.37139287713,-0.204132605503933,0.264049759922094,-  
0.773083851938213,0.439472757148458,0.831765550503143  
"8141","GATAD2A",108.516004011451,-0.154978841388212,0.200392380834828  
, -0.773376915542276,0.439299347674912,0.831765550503143  
"8142","ESS2",42.4130878816596,-0.211479436467411,0.272993296176725,-0  
.774668973301482,0.438535289257491,0.831765550503143  
"8143","RPS19BP1",674.718730079719,-0.175579370728674,0.22681031677905  
6, -0.77412426922234,0.438857306873466,0.831765550503143  
"8144","SREBF2-  
AS1",6.75133137525483,0.428902546759533,0.554805103547206,0.7730688561  
03339,0.439481631432052,0.831765550503143  
"8145","ZMAT1",43.8551958087242,0.316908662820114,0.40994291842294,0.7  
73055585492901,0.439489484842562,0.831765550503143  
"8146","SDHD",623.61246456424,-0.217667211342149,0.281656560158607,-0.

772810728142017,0.439634403356786,0.831915841856553  
"8147","STK11",109.484756311973,-0.148189031335784,0.191771118039643,-  
0.772739048771412,0.439676831891361,0.831915841856553  
"8148","CHI3L2",188.584371171242,-0.662855278116342,0.85823044084066,-  
0.772351161847693,0.439906471127372,0.831954611711218  
"8149","ZSCAN26",63.9975381477188,0.184710946580898,0.239148750170449,  
0.772368437841504,0.439896241821617,0.831954611711218  
"8150","BBS4",103.749843005272,0.139642913854279,0.180805023239339,0.7  
72339790966026,0.439913204025828,0.831954611711218  
"8151","CALCOC02",467.233886421944,0.113376484617905,0.146779666274466  
,0.772426368689928,0.439861941325995,0.831954611711218  
"8152","C1orf43",427.105252939588,-0.175292880380209,0.227027569427725  
, -0.772121556963654,0.440042435663129,0.832032903470396  
"8153","TMEM217",9.41926069531526,-0.818577923929429,1.06044280699255,  
-0.771920860353556,0.440161301405239,0.832032903470396  
"8154","POMZP3",15.7940826261616,0.358416490512731,0.464367739721457,0  
.771837618883088,0.440210607886283,0.832032903470396  
"8155","MRPL48",81.9246349678622,-0.202291100510211,0.262098184346853,  
-0.771814200141521,0.440224480097603,0.832032903470396  
"8156","LCMT1",152.442536279835,-0.176445117010316,0.228549058896718,-  
0.772022942741814,0.440100839194497,0.832032903470396  
"8157","KIAA2026",253.15157226979,0.173018042722535,0.224247086926702,  
0.771550904378474,0.440380461945383,0.832225673763404  
"8158","BICRA",27.704526992213,0.271722631321742,0.352248810584644,0.7  
71394035002564,0.440473409668647,0.832299290272395  
"8159","LAMA1",4.90326891991752,-0.525839954562032,0.681929047362327,-  
0.771106549275118,0.44064377895517,0.832519163205533  
"8160","ZNF595",58.408346634424,0.239240329059882,0.310441858912981,0.  
770644557720365,0.440917642698454,0.832934492916258  
"8161","CEP104",69.2803634051599,0.208289392032458,0.270395643901045,0  
.770313415657996,0.441114000239373,0.833018437241173  
"8162","DNAAF5",65.5758063735526,0.171625551642353,0.222776065936535,0  
.770394929638654,0.441065660188923,0.833018437241173  
"8163","VPS39",92.2533690332536,0.17579005707632,0.228248894304688,0.7  
7016827446997,0.441200080501924,0.833018437241173  
"8164","MIR762HG",20.3390542787276,-0.280528506837726,0.36423164481645  
8,-0.770192570662246,0.441185670257856,0.833018437241173  
"8165","ZNF875",41.0783794316044,0.238432542142358,0.309606817162121,0  
.770113992733906,0.441232276359013,0.833018437241173  
"8166","AVPI1",72.7345149578681,-0.205284295437936,0.266627306762832,-  
0.769929749245595,0.441341565822951,0.833081779760398  
"8167","PRIM1",34.5548092310809,-0.237140900455295,0.308025111658069,-  
0.769875219519568,0.441373914713147,0.833081779760398  
"8168","CKS2",36.5343493784826,-0.291929052229168,0.379425292415625,-0  
.769397976530746,0.441657089454779,0.833208276507544  
"8169","HNRNPF",845.553749146406,-0.152120856497066,0.197714158711566,  
-0.76939788980407,0.44165714092398,0.833208276507544  
"8170","AC010186.3",3.68377192037933,0.593484247819444,0.7713218588478  
01,0.769437869563283,0.441633414721746,0.833208276507544  
"8171","AC116158.3",3.92521372009836,0.702556789857017,0.9129003817507

41,0.769587573739063,0.441544578460151,0.833208276507544  
"8172","ADAMTS9-  
AS2",10.7419112470547,0.465809592153594,0.60641771389596,0.76813322150  
6638,0.44240804170831,0.833606496615883  
"8173","HOXA6",18.4918594521175,0.314895846885617,0.409901045825897,0.  
768224063081232,0.442354079903133,0.833606496615883  
"8174","AC091563.1",14.8783983040513,0.364269809462025,0.4741371576951  
05,0.768279396689405,0.442321212421995,0.833606496615883  
"8175","EMG1",150.077785775124,-0.210492872691368,0.273920353209198,-0.  
.768445536176021,0.44222536010758,0.833606496615883  
"8176","BTG1",2567.85680737685,-0.162557384243415,0.21155761698415,-0.  
768383509706455,0.442259374361055,0.833606496615883  
"8177","NPIPA5",7.08404537359929,0.833820757381273,1.08471783651442,0.  
768698300436021,0.442072434091489,0.833606496615883  
"8178","MC1R",7.7926187510964,-0.397874243971148,0.517791867206984,-0.  
768405742093474,0.442246170047017,0.833606496615883  
"8179","LINC02193",8.39936200936381,0.452797694281424,0.58947931611874  
8,0.768131606826744,0.442409000896175,0.833606496615883  
"8180","GEMIN4",44.3402674664581,0.219284430798501,0.285470634495827,0.  
.768150570673518,0.442397735647526,0.833606496615883  
"8181","AC067852.3",9.09794356956935,0.497440523347861,0.6472986901643  
37,0.768486837539514,0.44219800755211,0.833606496615883  
"8182","KDM4B",96.5375512439932,0.216532584563218,0.282002505966387,0.  
767839221219642,0.442582709872862,0.833831883731382  
"8183","TMEM184A",5.15415911646655,0.627736642837209,0.817772907623549  
,0.767617314030877,0.442714573007502,0.833978387255364  
"8184","AC092155.1",5.52251878668448,0.636650491675856,0.8296952638205  
25,0.767330512101818,0.44288503159475,0.834197551568068  
"8185","C7orf50",222.271743333282,0.206148560570256,0.268824467352836,  
0.766851926092289,0.443169559153785,0.834223806857443  
"8186","STARD3NL",117.276313704006,-0.158402507872467,0.20650966057557  
6,-0.767046478266312,0.443053881962123,0.834223806857443  
"8187","SKIDA1",9.61744486668084,-0.38730407514244,0.505049059882295,-  
0.766864263112783,0.443162223272759,0.834223806857443  
"8188","NRL",3.32224044565906,-0.615577771020538,0.802549338525292,-0.  
767027946408479,0.443064899924682,0.834223806857443  
"8189","SGSM3",130.311922184898,-0.1373787462624,0.179070306359808,-0.  
767177702741867,0.442975868018278,0.834223806857443  
"8190","TNFRSF14-  
AS1",4.36433849639749,0.554366857295753,0.72385101010415,0.76585768280  
6837,0.443760987607003,0.834387542250605  
"8191","SAPCD1",3.13035388701244,0.726572396581318,0.948291214700909,0.  
.766191213540325,0.443562535671291,0.834387542250605  
"8192","RXRB",99.539833035208,0.158995472677303,0.207464085651979,0.76  
6375887072896,0.443452676093538,0.834387542250605  
"8193","CLDN15",25.4054225936831,-0.263312683860195,0.343648864678351,  
-0.766225967621488,0.44354185979025,0.834387542250605  
"8194","RND1",20.0577011370344,0.259707483384757,0.339045701343514,0.7  
65995505489766,0.443678976488805,0.834387542250605  
"8195","ZDHHC20",100.345550503492,0.231732543516456,0.302432609954182,

0.766228693233719,0.443540238293632,0.834387542250605  
"8196","HHIPL1",17.5805535240703,0.300009228501967,0.391807935243107,0  
.765704830137804,0.443851952413556,0.834387542250605  
"8197","HIC1",683.353121662288,0.109811295695676,0.143381158497028,0.7  
6586977568571,0.443753791416581,0.834387542250605  
"8198","ANAPC11",840.659128543586,-0.17630667334005,0.230235757465312,  
-0.765765818832953,0.443815655893324,0.834387542250605  
"8199","KLHL26",25.1021437203201,-0.243176209405751,0.317393852425013,  
-0.766165467754936,0.443577852696401,0.834387542250605  
"8200","TAB3",41.2748809878339,0.244931415695261,0.319772308635708,0.7  
65955678714797,0.443702674444042,0.834387542250605  
"8201","MEA1",233.214132335194,-0.172628558784126,0.225527928481015,-0  
.76544204501332,0.444008364481057,0.834478046631979  
"8202","PRR11",6.41185160996103,0.476447107723423,0.622376777610117,0.  
765528414400272,0.443956953174299,0.834478046631979  
"8203","TRAPPC3L",4.10486630127131,0.555791933134952,0.726619369397208  
,0.764901070000417,0.444330456725196,0.834772674094839  
"8204","WDR61",259.454424449568,-0.16554997253203,0.216457552231356,-0  
.764814952518197,0.444381742693627,0.834772674094839  
"8205","GHDC",94.7874543835554,0.177337884674098,0.231795379993241,0.7  
65062205637011,0.444234503899909,0.834772674094839  
"8206","SAP30BP",201.567962027749,-0.155441220565568,0.203201405372624  
, -0.76496134601296,0.444294562264212,0.834772674094839  
"8207","DENND2C",45.7255861708911,0.256513992681087,0.335940382014363,  
0.763569985671207,0.44512354126206,0.834837929251672  
"8208","VANGL1",95.4387409902127,0.199079360893668,0.260530841576401,0  
.764129727172005,0.444789938679555,0.834837929251672  
"8209","PDE1A",76.1215199906772,-0.376408841198139,0.493131926334583,-  
0.763302518244885,0.445283000603779,0.834837929251672  
"8210","DCK",51.1344513178229,-0.242123700221429,0.317176273778426,-0.  
763372673930119,0.445241171876803,0.834837929251672  
"8211","ZNF300",15.1789448600345,-0.309215142635288,0.40460166642541,-  
0.76424584546859,0.444720750735378,0.834837929251672  
"8212","TMEM248",406.845461579055,0.100346344398228,0.131264809741751,  
0.764457317963955,0.444594762703062,0.834837929251672  
"8213","FRMPD2",2.7878628988975,0.866658154164617,1.13525611740707,0.7  
63403201159635,0.445222971412005,0.834837929251672  
"8214","CNNM2",29.6505687627134,0.337675071457059,0.441690729544012,0.  
764505679812807,0.444565953239695,0.834837929251672  
"8215","PELI3",44.7465760273288,-0.210550865374644,0.275611090671071,-  
0.763941918527246,0.444901855606781,0.834837929251672  
"8216","FADD",78.3439458420537,-0.208985119193415,0.273717306318373,-0  
.763507145398893,0.445161002592909,0.834837929251672  
"8217","ITFG2-  
AS1",5.18037328483753,-0.593782147440617,0.77748736542632,-0.763719352  
680448,0.445034505466763,0.834837929251672  
"8218","CHD4",370.533970038095,0.182312952978576,0.238627539616606,0.7  
6400633921588,0.444863464906653,0.834837929251672  
"8219","OAS2",30.0317498309215,0.3584879767443,0.469608509900661,0.763  
376236133654,0.445239048053962,0.834837929251672

"8220", "AC009283.1", 11.4305482251271, 0.360215422120591, 0.4711801591691  
08, 0.76449615950681, 0.444571624462803, 0.834837929251672  
"8221", "MPPE1", 139.778186095493, -0.121473491956355, 0.159136177388155, -  
0.763330462940962, 0.445266338947774, 0.834837929251672  
"8222", "TP53RK", 75.1159763771951, -0.219974562317808, 0.288113228847227, -  
0.763500389058672, 0.445165030395652, 0.834837929251672  
"8223", "GUK1", 2149.56279139619, -0.20756418382889, 0.271979119913321, -0.  
76316220118309, 0.445366668171387, 0.834893249405562  
"8224", "CSE1L", 108.964830631566, 0.160206836036018, 0.209982000450502, 0.  
762955089923444, 0.44549017982754, 0.835023239547852  
"8225", "MAIP1", 81.4495512129969, -0.202744782482059, 0.265873911738463, -  
0.762559895991209, 0.445725909515886, 0.835186873814117  
"8226", "ZNF398", 47.8084607722404, 0.193972132537266, 0.254395605711945, 0.  
.762482244905218, 0.445772236054775, 0.835186873814117  
"8227", "WWP2", 51.3102044910556, 0.194131101621882, 0.254616388005487, 0.7  
62445430722622, 0.445794200307659, 0.835186873814117  
"8228", "CACTIN", 38.1501206434081, -0.211648069675102, 0.277577276222071, -  
0.762483415630093, 0.445771537581441, 0.835186873814117  
"8229", "ABCA5", 56.1100445578287, 0.250290702377093, 0.3283774787822, 0.76  
2204226992988, 0.445938123677141, 0.835354985597658  
"8230", "USP38", 59.5303425632756, 0.174476241606851, 0.228940334713985, 0.  
762103549052741, 0.445998204823289, 0.835366017904131  
"8231", "VILL", 30.8365991882772, -0.26944791877459, 0.353606199301632, -0.  
761999985596254, 0.446060012756795, 0.835380281453772  
"8232", "COL3A1", 20214.8773699007, 0.326956189212479, 0.429354321101347, 0.  
.761506693059001, 0.446354482703112, 0.835627198308048  
"8233", "BUD31", 556.657887848176, -0.198184349202062, 0.260217611233813, -  
0.761610054993501, 0.446292771849514, 0.835627198308048  
"8234", "LINC00598", 3.81118340909041, -0.550091698665006, 0.7223060506081  
15, -0.761577032619177, 0.446312486886155, 0.835627198308048  
"8235", "S1PR1", 7.96748820566688, 0.410324331626981, 0.538927823335018, 0.  
761371586064704, 0.446435153842288, 0.835676733027186  
"8236", "PPP1R15B", 336.792785973527, -0.311621934392574, 0.40940571504811  
, -0.761156776612058, 0.446563431669657, 0.835763409038052  
"8237", "PCDHB15", 11.4913906862913, -0.464367050438215, 0.610116203385134  
, -0.761112469824187, 0.446589892977388, 0.835763409038052  
"8238", "MAGEE1", 22.9176726806113, 0.260825160604831, 0.342872365341172, 0.  
.760706277233219, 0.446832524643535, 0.836115970791465  
"8239", "MANEAL", 6.92516562323024, 0.498821308536226, 0.656129572223868, 0.  
.760248173002679, 0.447106254740826, 0.836377617687288  
"8240", "RFK", 157.522512718023, -0.130643654137791, 0.171824526460461, -0.  
760331815422487, 0.447056268938334, 0.836377617687288  
"8241", "PAFAH1B2", 270.962993233145, 0.121856506814694, 0.16029535410819,  
0.760199866631494, 0.447135124707164, 0.836377617687288  
"8242", "ZHX2", 133.824204873802, 0.210874286239277, 0.277522366420692, 0.7  
59846094421147, 0.447346586516594, 0.836671636878584  
"8243", "PON3", 27.0252012081438, 0.348630157595337, 0.458924074857598, 0.7  
59668487000852, 0.447452770012084, 0.836768706749517  
"8244", "AC012184.3", 3.70380376210004, 0.640907438103443, 0.8438040517626  
21, 0.759545343216417, 0.447526400558035, 0.836804884109911

"8245", "AC112220.2", 6.38570974720246, -0.482703847297408, 0.635755560306  
478, -0.759260126745429, 0.447696964598185, 0.836857765494603  
"8246", "C9orf85", 122.390099645521, 0.147954014015082, 0.194874872604269,  
0.759225712570605, 0.44771754732624, 0.836857765494603  
"8247", "AC109460.2", 2.84314092421502, 0.757956929541427, 0.9983072327152  
75, 0.759242149813817, 0.447707716330216, 0.836857765494603  
"8248", "NIT1", 122.442267047734, -0.179189737908088, 0.236217452323453, -0  
.758579589042065, 0.448104086311138, 0.837478720960984  
"8249", "XRCC6", 639.61013634481, -0.127595540624221, 0.168227536089305, -0  
.758470007885548, 0.448169661285996, 0.837499736783081  
"8250", "CRCP", 167.564576406249, -0.162931795812329, 0.214879916447879, -0  
.758245807731639, 0.448303842936861, 0.837648938045055  
"8251", "TLCD4", 58.2766771824547, -0.292872302756401, 0.386505533322057, -  
0.75774413949299, 0.448604169214237, 0.837754076926953  
"8252", "SNRNP27", 250.041497921261, 0.108508960516508, 0.143173835540686,  
0.757882612467084, 0.448521260243793, 0.837754076926953  
"8253", "LINC01473", 26.6183394125414, 0.2697637044286, 0.356201326292257,  
0.757334924146981, 0.448849232652592, 0.837754076926953  
"8254", "DNPEP", 218.3293415703, -0.122766637929094, 0.162057585055395, -0.  
75754947160992, 0.448720738899214, 0.837754076926953  
"8255", "WASHC3", 414.709947844078, -0.204556346119043, 0.269916904592751,  
-0.757849333029644, 0.448541185098705, 0.837754076926953  
"8256", "ZCCHC2", 82.0098006935761, -0.248238926761762, 0.327768374234677,  
-0.757360826349973, 0.448833718560657, 0.837754076926953  
"8257", "AL117332.1", 11.5321593765067, -0.347611469429428, 0.458918342443  
933, -0.757458217028874, 0.448775389259356, 0.837754076926953  
"8258", "SLA2", 2.97547354502596, 0.703271172338873, 0.928609565075467, 0.7  
57337850899392, 0.448847479662661, 0.837754076926953  
"8259", "AC006946.2", 6.59028423923494, 0.529700389774498, 0.6993961980589  
17, 0.757368128743926, 0.448829344855969, 0.837754076926953  
"8260", "STN1", 75.8166788333266, -0.234318249260453, 0.309455572557837, -0  
.757195119556811, 0.448932973690375, 0.83780893333459  
"8261", "XAB2", 122.362453488292, -0.154427457198849, 0.203981419908658, -0  
.757066291959342, 0.449010147508114, 0.837851522072095  
"8262", "KLC4", 28.9708989606762, 0.233082421275513, 0.308010535060872, 0.7  
56735224103451, 0.44920850732207, 0.837999367846103  
"8263", "MVK", 24.7344784976746, -0.270625586651395, 0.357657229597427, -0.  
756661865764623, 0.449252466810262, 0.837999367846103  
"8264", "MMD", 52.8301845086536, 0.322621747035399, 0.426316050557231, 0.75  
6766597489597, 0.449189707777672, 0.837999367846103  
"8265", "LCK", 8.02445590670053, 0.564812448406261, 0.746756494353725, 0.75  
6354250250042, 0.449436829894775, 0.83824183095317  
"8266", "MCEE", 149.878504578182, -0.201054688834545, 0.265913103144996, -0  
.756091694830528, 0.449594221064843, 0.838423398507907  
"8267", "COLCA1", 35.6665419974132, 0.296764726926909, 0.39254053519169, 0.  
756010399746334, 0.449642960458311, 0.838423398507907  
"8268", "TMEM63B", 53.6156971974986, 0.198521466496218, 0.262658704637177,  
0.755815295634102, 0.449759944772026, 0.838540100225057  
"8269", "ANKS1B", 15.0337693727009, -0.373907534452258, 0.494874264390562,  
-0.755560677443443, 0.449912639641244, 0.838723345032021



"8270", "LURAP1", 28.2000601110879, -0.229907363858118, 0.304562088377412, -0.754878471851094, 0.450321904041892, 0.838755338044119  
"8271", "NRP2", 22.1197651875143, -0.520851157397456, 0.690481439089179, -0.754330424992329, 0.450650837507186, 0.838755338044119  
"8272", "DHFR2", 55.51622674479, 0.183219148815769, 0.242868006471867, 0.75439804310739, 0.450610246283824, 0.838755338044119  
"8273", "KLKB1", 2.49517171850203, 0.970732533801184, 1.28548561695645, 0.755148498743622, 0.450159886028869, 0.838755338044119  
"8274", "TTC1", 319.672365927008, -0.146851835903432, 0.194457838331618, -0.75518599385538, 0.450137391312946, 0.838755338044119  
"8275", "GTF2IRD1", 13.3724696510881, 0.320085567337693, 0.424196710651831, 0.754568716117203, 0.450507800311091, 0.838755338044119  
"8276", "AC007032.1", 32.1872570445463, -0.277482530654083, 0.367985152498951, -0.754059039528433, 0.45081377130749, 0.838755338044119  
"8277", "UBQLN1", 190.139408653628, 0.125400643103674, 0.166229061664556, 0.754384593451701, 0.450618319960877, 0.838755338044119  
"8278", "STIM1", 179.343925477408, 0.162989163403944, 0.215938727186495, 0.754793572822994, 0.450372850874068, 0.838755338044119  
"8279", "LRP4", 22.0381865301483, -0.37377805883492, 0.495816777997405, -0.753863272527005, 0.450931326167477, 0.838755338044119  
"8280", "USP5", 94.7109685234024, -0.171267406295597, 0.227118029952526, -0.754089872703618, 0.450795258075274, 0.838755338044119  
"8281", "EFNB2", 7.30219036212275, -0.602269954219574, 0.798339734179971, -0.754403079834435, 0.450607222814306, 0.838755338044119  
"8282", "KIAA0586", 101.9555188163, 0.165314666741848, 0.219291372483483, 0.753858507380628, 0.4509341877757, 0.838755338044119  
"8283", "ZNHIT3", 216.39198290783, -0.212716890153097, 0.281919993369484, -0.754529281909815, 0.450531469406329, 0.838755338044119  
"8284", "RAD51C", 92.2850704817881, 0.183724676558405, 0.243387391399715, 0.754865219195656, 0.45032985657763, 0.838755338044119  
"8285", "RAC3", 5.05084840777653, -0.520801647801714, 0.690302141990172, -0.754454630982629, 0.450576278116117, 0.838755338044119  
"8286", "ROCK1", 588.983221940153, -0.159012994857005, 0.210859067273547, -0.754119786799195, 0.450777297099469, 0.838755338044119  
"8287", "SEPTIN5", 17.2743168381638, 0.400524032257856, 0.53133322895335, 0.753809493614451, 0.450963622556578, 0.838755338044119  
"8288", "NDP", 3.2670418425242, -0.726084675805959, 0.962632697866649, -0.754269699559429, 0.450687292811069, 0.838755338044119  
"8289", "SRD5A3", 99.0831931743358, 0.169195406168803, 0.224516787354553, 0.753598018938387, 0.451090634258945, 0.838789158878364  
"8290", "PFAS", 22.7169633487815, 0.359797278139749, 0.477395770802522, 0.75366664316935, 0.451049403621595, 0.838789158878364  
"8291", "AL691432.2", 20.48099835033, -0.290065206447425, 0.385035188868262, -0.753347264960425, 0.451241263344232, 0.838940799612863  
"8292", "TMED8", 51.1374881387554, 0.205838832053487, 0.273256345398252, 0.753281069295909, 0.451281032136871, 0.838940799612863  
"8293", "AC009163.7", 4.50722555516042, 0.589004650721867, 0.782052575762436, 0.753152241903477, 0.451358434278291, 0.838983511925703  
"8294", "ER01A", 126.162223556976, 0.130516207170329, 0.173329228717072, 0.752995949594701, 0.451452347987939, 0.839056901884987

"8295", "DNM30S", 82.8109648417624, -0.18717952201993, 0.248706538522028, -0.752611986529466, 0.451683112578221, 0.839182256284594  
"8296", "IN080", 135.770433514829, -0.162370078221101, 0.215713196795006, -0.752712771557514, 0.451622533588293, 0.839182256284594  
"8297", "RRP1B", 136.111212839084, -0.159153310931032, 0.211443274505273, -0.752699802362657, 0.451630328741753, 0.839182256284594  
"8298", "ASTN2", 11.1799829511271, 0.345767782369547, 0.459506538499431, 0.752476305339832, 0.45176467390729, 0.839232640188103  
"8299", "PLRG1", 191.219845102876, -0.165104190799267, 0.219535154312086, -0.75206265400465, 0.452013381378815, 0.839504186666318  
"8300", "TTYH3", 57.6405663912126, 0.270442989136442, 0.359650061716669, 0.751961470117851, 0.45207422987461, 0.839504186666318  
"8301", "ZNF383", 45.2265850673738, 0.206552767737756, 0.274675594685124, 0.751988060586668, 0.452058238836296, 0.839504186666318  
"8302", "FALEC", 6.74806863362902, 0.639032236299594, 0.850800395585143, 0.751095368097585, 0.452595263124625, 0.839561489899651  
"8303", "MR1", 149.09498784302, 0.157946144293121, 0.210278776824959, 0.751127368524687, 0.45257600614153, 0.839561489899651  
"8304", "HSPB1", 1570.06826301638, -0.163171156394856, 0.217087165170768, -0.751638892453636, 0.452268247850829, 0.839561489899651  
"8305", "TRPV3", 9.59899696686892, 0.404793898105762, 0.538690056262873, 0.751441192202419, 0.452387180151572, 0.839561489899651  
"8306", "TRAF4", 23.9035547563146, -0.316369339174684, 0.421143109434311, -0.751215755612476, 0.452522819610795, 0.839561489899651  
"8307", "CFAP298", 233.439798559569, -0.166755817309431, 0.221904488091602, -0.751475640459306, 0.452366455535636, 0.839561489899651  
"8308", "CRYBB2", 2.93109061756088, -1.13657670688955, 1.51276817992452, -0.751322457712098, 0.452458616809234, 0.839561489899651  
"8309", "ACOT9", 283.123948884027, -0.130174294527619, 0.173207510152422, -0.751551098523762, 0.452321060645835, 0.839561489899651  
"8310", "RBMX", 821.445419893724, 0.116278723229004, 0.154720263909199, 0.751541655185162, 0.452326741532093, 0.839561489899651  
"8311", "P2RX7", 25.6035134416796, 0.30530773534623, 0.406646374199672, 0.750794190522691, 0.452776526240676, 0.839695639076037  
"8312", "AC130371.2", 12.4204409084447, 0.336755460069538, 0.448530407099224, 0.750797392416342, 0.452774598971843, 0.839695639076037  
"8313", "ZNF10", 21.389886499618, 0.258994599511613, 0.345067877476789, 0.750561313923041, 0.452916710654942, 0.83985457653626  
"8314", "CKS1B", 530.811792915852, -0.20145474378641, 0.268589582621319, -0.750046750958464, 0.453226548320212, 0.839937693874673  
"8315", "PRKG2", 26.3127484052997, 0.444692225099313, 0.59301375632522, 0.749885176112905, 0.453323863272455, 0.839937693874673  
"8316", "CDK5RAP2", 112.889571462917, 0.167398143191534, 0.223216463904708, 0.74993636339924, 0.453293032393431, 0.839937693874673  
"8317", "TMEM132C", 37.7749664022585, -0.407183493467467, 0.543017405619833, -0.749853483983046, 0.453342952516204, 0.839937693874673  
"8318", "ARGLU1", 1135.26699912647, 0.132470505396044, 0.176629682481701, 0.749990055662179, 0.453260694000783, 0.839937693874673  
"8319", "PPP2R5E", 326.910793249023, 0.126384009496048, 0.16842691443938, 0.750378939831114, 0.453026511252221, 0.839937693874673

"8320", "RHBDF1", 164.431221684003, 0.177069797670783, 0.236117605497389, 0.749922045405213, 0.453301656219204, 0.839937693874673  
"8321", "ARL5A", 464.857729731143, -0.119912844726497, 0.159961730361108, -0.749634581070098, 0.453474817546401, 0.839980090420305  
"8322", "RNF168", 151.685321059259, -0.180026935888705, 0.240149884414379, -0.749644066361773, 0.453469103248467, 0.839980090420305  
"8323", "FZD4-  
DT", 4.41270465517299, 0.599283544433019, 0.799559809940292, 0.749516842871043, 0.453545750866388, 0.840010543025997  
"8324", "SMAD9", 87.3747991236321, -0.294417197913616, 0.393000896103269, -0.749151467166763, 0.453765917339896, 0.840317349326585  
"8325", "BVES", 9.21192737539132, -0.376327322455174, 0.502524855985335, -0.748873051696684, 0.453933724163494, 0.840527130087719  
"8326", "CNTNAP1", 40.479374733155, 0.209014749784068, 0.279168385588223, 0.748704941441211, 0.454035064671495, 0.840613802775773  
"8327", "AL691447.2", 8.74507829690744, 0.468631555430713, 0.626139504478832, 0.748445916730296, 0.454191235353678, 0.840801956644282  
"8328", "MUTYH", 40.571572406328, -0.224711929696186, 0.300340889490965, -0.748189599082032, 0.454345803704954, 0.840987099437064  
"8329", "WEE1", 156.203048672168, -0.245632429219021, 0.328393824742038, -0.747981267345607, 0.454471456742046, 0.841118682396283  
"8330", "ZCCHC12", 9.41555723518126, -0.637333809161971, 0.852197097096351, -0.747871368411753, 0.454537748986843, 0.841140384229553  
"8331", "ARHGEF7", 143.115544417188, 0.189547825727324, 0.25352503159813, 0.74764935254118, 0.454671688022211, 0.841287248933187  
"8332", "TXNDC12", 303.657706836827, 0.167828676565458, 0.224911711474204, 0.746198032398625, 0.4555477965485, 0.841356388794157  
"8333", "PYG02", 38.6397568519251, 0.203520650211877, 0.272278849246258, 0.747471391095113, 0.454779065700543, 0.841356388794157  
"8334", "FOSL2", 292.595942795841, 0.21994194651658, 0.294612636050987, 0.746546208827635, 0.455337528675174, 0.841356388794157  
"8335", "AC064836.3", 16.0417812051322, -0.297670599793497, 0.398420962894659, -0.747125848074916, 0.454987598884233, 0.841356388794157  
"8336", "DCUN1D1", 149.463558722628, 0.130301937421307, 0.174432504613058, 0.747004910067386, 0.455060596982278, 0.841356388794157  
"8337", "CSNK1A1", 787.825512145557, 0.126373634104447, 0.169430228962893, 0.745874185958424, 0.455743420296401, 0.841356388794157  
"8338", "MAPK9", 131.88323113735, -0.138188219602989, 0.185137887831849, -0.746407022470178, 0.455421578410803, 0.841356388794157  
"8339", "AC002467.1", 16.0368322992529, -0.353172619725895, 0.473266718481554, -0.746244360598663, 0.455519815247713, 0.841356388794157  
"8340", "RBM33", 219.5542507985, 0.167377301887563, 0.22413649259198, 0.746765062449061, 0.455205388348552, 0.841356388794157  
"8341", "VPS37A", 132.619337897561, 0.130782098465085, 0.175078524308458, 0.746991094319882, 0.455068936577701, 0.841356388794157  
"8342", "AC022893.1", 3.51280719792975, 0.714022424875527, 0.956706757077539, 0.746333627930734, 0.455465902302803, 0.841356388794157  
"8343", "SPOUT1", 47.5925286006117, -0.211940973086739, 0.284051975909287, -0.74613447911527, 0.45558618302675, 0.841356388794157  
"8344", "SELENOH", 743.355668572945, -0.184690509873007, 0.247369497452944

, -0.746617961287406, 0.45529420330503, 0.841356388794157  
"8345", "VDR", 35.5211385257505, 0.418355376739088, 0.560001635928914, 0.74  
7060990357882, 0.455026746137496, 0.841356388794157  
"8346", "CFAP54", 3.38209356965009, 0.667759066844034, 0.894187009317754, 0.  
.746777866246927, 0.45519765828818, 0.841356388794157  
"8347", "SELPLG", 6.17073594497106, 0.51818454632121, 0.694133060978195, 0.  
746520480656789, 0.455353064352833, 0.841356388794157  
"8348", "AC005520.3", 3.04024971132922, -0.639091762790592, 0.856936263993  
274, -0.745786810109378, 0.455796208935506, 0.841356388794157  
"8349", "HIRIP3", 79.255820863798, -0.198210691951605, 0.26580875417383, -0.  
.745689104813992, 0.455855242245138, 0.841356388794157  
"8350", "MT1X", 2256.87471160536, -0.317029480373582, 0.42502638045896, -0.  
745905418932447, 0.455724551543936, 0.841356388794157  
"8351", "DOHH", 63.4321258232272, -0.20370245504287, 0.273146467313258, -0.  
745762729595379, 0.455810757926, 0.841356388794157  
"8352", "NDUFA1", 956.57593004633, -0.184786899208731, 0.247444317088078, -  
0.746781746225987, 0.455195315835898, 0.841356388794157  
"8353", "METTL6", 57.3503639068178, 0.204846942485306, 0.274764257698939, 0.  
.74553708040788, 0.455947103586356, 0.841425188768548  
"8354", "PPARD", 41.7713321916634, -0.199924327643066, 0.268258172201441, -  
0.745268358471252, 0.456109505334335, 0.841443723386195  
"8355", "METTL27", 67.8925044336911, 0.363732437746478, 0.48806104923927, 0.  
.745260123325595, 0.456114482747464, 0.841443723386195  
"8356", "NRBF2", 277.126012925763, -0.205232222217592, 0.275442204451015, -  
0.745100855646437, 0.456210751902751, 0.841443723386195  
"8357", "ITGA5", 260.413309823776, -0.206741620920582, 0.277426102900613, -  
0.745213297375433, 0.456142785450393, 0.841443723386195  
"8358", "GALK1", 185.786675837802, -0.197440219774948, 0.264995926476788, -  
0.745068886152266, 0.456230077201545, 0.841443723386195  
"8359", "RIC8B", 50.3026916056885, 0.19349170360201, 0.259818858706697, 0.7  
44717702807087, 0.456442394972712, 0.84173459965359  
"8360", "CEP295NL", 6.78040160234233, 0.621568978067202, 0.834856040859762  
, 0.744522345944925, 0.456560527499746, 0.841851738206769  
"8361", "EIF2S3", 622.707805026044, -0.148904713383721, 0.200076877321398,  
-0.744237491994262, 0.456732809816735, 0.842068683569546  
"8362", "AC005632.3", 9.4644346509533, 0.378248805917834, 0.50834942488764  
3, 0.74407245764355, 0.456832640838261, 0.842152016087274  
"8363", "PRPF38A", 171.618537487229, -0.146784419297941, 0.19731305473101,  
-0.74391640987996, 0.456927047054919, 0.842180894085894  
"8364", "GSK3A", 127.872592925561, -0.145251716795047, 0.195265982799502, -  
0.743865955106939, 0.456957573670738, 0.842180894085894  
"8365", "SEMA6C", 52.4824259100553, 0.203254738426313, 0.273277196062536, 0.  
.743767651874621, 0.457017053296954, 0.842189823858046  
"8366", "ST6GAL1", 6.62028033755701, -0.559047987678217, 0.752321672223282  
, -0.743097013310946, 0.457422947751246, 0.842559165024472  
"8367", "AGPAT1", 155.452030540665, 0.148228447030215, 0.199503959716669, 0.  
.742984987569802, 0.457490769461877, 0.842559165024472  
"8368", "KIF21A", 58.3482977775317, -0.179212058480311, 0.241202750323896,  
-0.74299342872193, 0.457485658891729, 0.842559165024472  
"8369", "VMP1", 1769.32355204019, -0.225136564261434, 0.302955707089062, -0

.743133596738115,0.457400800933954,0.842559165024472  
"8370","RAVER1",43.5799606364662,-0.191134207792011,0.25720325925381,-  
0.74312513903021,0.457405920994284,0.842559165024472  
"8371","ZNF852",7.38426454044002,-0.408637201079522,0.550089328482557,  
-0.742856077951492,0.457568819857328,0.842602240843473  
"8372","PFN4",11.0426706612365,0.34938460994574,0.470513621167107,0.74  
2560032755467,0.457748093460808,0.842605107561998  
"8373","ATG2A",55.8078628044575,0.21121623223532,0.284408044799851,0.7  
4265210178552,0.457692335768247,0.842605107561998  
"8374","NEDD1",89.4999214917053,0.146574837388355,0.197406572947983,0.  
742502314889878,0.457783049775483,0.842605107561998  
"8375","FBXW9",35.0301539699063,-0.252234563238596,0.339713301991696,-  
0.742492453959786,0.457789022110395,0.842605107561998  
"8376","SUPT16H",375.22401892187,-0.142579710308123,0.192094364104516,  
-0.74223786300439,0.457943231876418,0.842788314156517  
"8377","AC245014.3",9.60797156148756,-0.393396119562644,0.530446037135  
383,-0.741632686497457,0.458309913817598,0.842965032789359  
"8378","COP1",103.432038812269,-0.145044151793871,0.195576610856528,-0  
.741623199004469,0.458315663686462,0.842965032789359  
"8379","AN010",78.8290888415555,-0.149256833795057,0.201247131087209,-  
0.741659436279752,0.458293702403923,0.842965032789359  
"8380","NUDCD3",127.734944706924,0.174759493866656,0.235712580132734,0  
.741409278063337,0.458445320620499,0.842965032789359  
"8381","LTBR",323.245984589385,-0.121596690146632,0.16398074716113,-0.  
741530284815385,0.458371976211743,0.842965032789359  
"8382","RAB5B",208.106823130116,0.131032059757434,0.176729211845981,0.  
74142841689142,0.458433719788157,0.842965032789359  
"8383","SRRM2",1640.63726098796,0.143303564314293,0.193209300199501,0.  
741701171560183,0.458268409834971,0.842965032789359  
"8384","MIS12",45.0292497825019,-0.18068158180219,0.24371722473989,-0.  
741357456351413,0.458476732721764,0.842965032789359  
"8385","CYBRD1",3077.20459636952,0.160664929729336,0.216792869891216,0  
.741098772344107,0.458633553929967,0.843086394050919  
"8386","SLC39A11",50.4658659834542,0.221986280173263,0.299549079844881  
,0.741068142450034,0.458652124587156,0.843086394050919  
"8387","AP001107.9",6.58155120457467,-0.459633468359578,0.620494888923  
744,-0.740753028855432,0.458843199886761,0.84314583654129  
"8388","SLFN12L",7.46169394547515,0.432545587443587,0.583833581792399,  
0.740871373167076,0.458771434264739,0.84314583654129  
"8389","ZNF813",21.5553031215928,0.268012116904203,0.361814666141,0.74  
0744204105197,0.458848551589029,0.84314583654129  
"8390","AC092040.1",66.0409421114945,-0.25506303554119,0.3444561181518  
87,-0.740480491128105,0.459008494448805,0.843245082612194  
"8391","AC005838.2",22.0651140579167,0.362215238898,0.489166216498022,  
0.740474764367675,0.45901196809594,0.843245082612194  
"8392","FAM174A",116.604838452353,-0.184360564094402,0.249029108944318  
, -0.740317326259334,0.459107470165024,0.843320025332918  
"8393","ZBTB17",55.4557356065295,-0.167953249573127,0.226919874570091,  
-0.740143409171722,0.459212981335206,0.843413333406673  
"8394","AC233266.2",6.28934507898981,-0.522523631270025,0.706269619241

434,-0.73983591681494,0.459399562533859,0.843555003747401  
"8395","AC084757.3",2.73637024392934,0.698914439125285,0.9446164079829  
,0.739892334305014,0.459365326168173,0.843555003747401  
"8396","SEPTIN8",193.606430597482,0.146984682371849,0.198718908560237,  
0.73966128053332,0.459505547798591,0.843646810688363  
"8397","TCERG1",161.968092284755,0.165445856409763,0.223704509768465,0  
.739573183307749,0.459559018446331,0.843646810688363  
"8398","HINT2",283.66162770016,-0.216588411186639,0.29301855903839,-0.  
739162774867998,0.459808161937007,0.844003669475943  
"8399","PRMT1",381.235929408212,-0.21373753202701,0.289246801696476,-0  
.738945187201403,0.459940281869179,0.844145665557019  
"8400","RPS18",25355.5375165398,-0.190857632559664,0.258391782603935,-  
0.738636618534466,0.460127682183733,0.844389073912172  
"8401","CASP1",63.2522040808019,0.254347425956065,0.34450421578047,0.7  
38299893891991,0.460332230962537,0.84439741471138  
"8402","IL18",38.1464270835563,-0.322234999778029,0.436391886787223,-0  
.738407402920268,0.460266917353657,0.84439741471138  
"8403","ZNF232",18.2354798677058,0.317121518080117,0.429547707682352,0  
.73826844471168,0.460351337867949,0.84439741471138  
"8404","UPF3B",104.253145254103,-0.154872707060732,0.209749479003288,-  
0.738369924906009,0.460289685312017,0.84439741471138  
"8405","NPHP4",25.4243753896116,0.237008084184542,0.321183225712252,0.  
737921738157263,0.460562008350933,0.844599665241204  
"8406","LINC01948",2.85026001840117,0.651297388394828,0.88312582108719  
9,0.737491049229009,0.460823784401004,0.844599665241204  
"8407","CCNB1",17.4839852437674,-0.263867532032737,0.357725260381639,-  
0.737626221171047,0.460741616897483,0.844599665241204  
"8408","AP002840.2",5.18852195151434,0.499365538727554,0.6767490826286  
26,0.737888756033358,0.460582052199164,0.844599665241204  
"8409","R3HDM2",294.977308844861,-0.135534682447585,0.183767185221763,  
-0.737534736052179,0.460797227422918,0.844599665241204  
"8410","ANKRD10",251.094960515183,-0.184830129051057,0.250524284767502  
, -0.737773302985727,0.46065221899928,0.844599665241204  
"8411","MTHFD1",60.37786495687,-0.179491221606694,0.24342222274559,-0  
.737365799759416,0.460899927603569,0.844599665241204  
"8412","RIBC1",5.28524809234479,-0.494097779687127,0.670010641146948,-  
0.737447660295832,0.460850161140323,0.844599665241204  
"8413","CHEK1",13.022370380689,-0.340253874678398,0.461721991057018,-0  
.736923692760348,0.461168754963059,0.844991840931363  
"8414","STX10",283.649337722139,-0.193846671348485,0.263286045288936,-  
0.736258813625134,0.461573205955947,0.845632394795688  
"8415","FUND2",499.107405595059,-0.151094990463,0.205269629518965,-0.  
736080592229255,0.461681653035233,0.845730562274286  
"8416","PSMB9",386.831869315025,0.223322765277832,0.303504939689494,0.  
735812621390302,0.461844739106604,0.845928784853648  
"8417","CENPL",53.0744503366549,-0.197635851957365,0.268631094110848,-  
0.735714726590113,0.461904325544127,0.845937409797162  
"8418","UQCRHL",2.99563565047547,0.61653640844064,0.839922438761931,0.  
734039692223762,0.462924547308199,0.846148252608864  
"8419","BX470102.2",6.1796481287249,0.432694387250822,0.58980412492980

1,0.733623874370701,0.46317800614037,0.846148252608864  
"8420","ZBTB41",128.967717951099,0.131672912636812,0.179169195983742,0  
.734908207372656,0.46239539957084,0.846148252608864  
"8421","WDR43",155.19076868983,-0.166782412535932,0.227464230722628,-0  
.733224788821007,0.463421338640993,0.846148252608864  
"8422","AC010913.1",6.6741221135147,-0.421266333075898,0.5734615983327  
58,-0.734602516194036,0.462581605144269,0.846148252608864  
"8423","LONRF2",14.6463888446411,0.433930137142695,0.59175224500322,0.  
7332969850251,0.463377313522198,0.846148252608864  
"8424","PMS1",76.1297546372342,0.162865517247791,0.221829665994395,0.7  
34191779614843,0.462831862832811,0.846148252608864  
"8425","MATR3.1",42.32034541988,0.266027156411581,0.362339661352274,0.  
734192761064993,0.462831264755083,0.846148252608864  
"8426","AC008429.1",2.55303572760019,0.732534944724219,0.9991531575420  
34,0.733155812194289,0.463463402644143,0.846148252608864  
"8427","HOXA10",319.313965845368,-0.176369278108841,0.240521133305138,  
-0.733279756690193,0.463387819118923,0.846148252608864  
"8428","PAG1",8.73210547915426,0.454127349727903,0.618318103871675,0.7  
34455851905886,0.462670957562575,0.846148252608864  
"8429","FNBP4",308.967418958138,0.192850426500556,0.262622238621089,0.  
734326336996923,0.462749870051936,0.846148252608864  
"8430","MAP3K11",36.8277514790457,-0.212935577430361,0.290164243265251  
, -0.733844994249371,0.463043214453262,0.846148252608864  
"8431","SIK2",154.897216370325,0.184983339764345,0.251717351395118,0.7  
34885135009938,0.46240945217279,0.846148252608864  
"8432","VPS29",587.844478604481,-0.195114213439945,0.265551768447342,-  
0.734750194211702,0.462491644856945,0.846148252608864  
"8433","AC079949.2",2.8289051158316,-0.596755656327107,0.8116661669763  
74,-0.73522302715924,0.462203677210877,0.846148252608864  
"8434","RCBTB2",60.7004286155312,-0.188629131762311,0.257094098160199,  
-0.733696856956916,0.463133514525174,0.846148252608864  
"8435","AL122035.2",4.7055035069572,-0.508758465942238,0.6922221532632  
48,-0.734964149216935,0.462361328259847,0.846148252608864  
"8436","IGHG4",127.561788507293,0.661713092307563,0.902631458746193,0.  
733093319422659,0.46350151443589,0.846148252608864  
"8437","AC103858.3",3.88767942389676,0.571385721352661,0.7789756494128  
88,0.733509092079211,0.463247984494753,0.846148252608864  
"8438","CSNK1D",207.118373434301,0.145553298247337,0.198477532579187,0  
.733348990970883,0.463345601831679,0.846148252608864  
"8439","PEPD",397.237239248973,-0.197757110199669,0.269631930386111,-0  
.733433573377166,0.463294028560274,0.846148252608864  
"8440","LMTK3",5.54412903541223,-0.547117219230786,0.745149567319228,-  
0.734238122420322,0.462803622847046,0.846148252608864  
"8441","ZNF584",29.769903503324,-0.222334927167972,0.302819235269167,-  
0.734216658893367,0.46281670198961,0.846148252608864  
"8442","KIZ",149.753280111198,-0.15590686033373,0.212145775174723,-0.7  
34904384522038,0.462397727924409,0.846148252608864  
"8443","NANP",30.438754409477,-0.216499051811021,0.295264445590641,-0.  
733237797656065,0.463413405704022,0.846148252608864  
"8444","SPATC1L",145.498773695953,0.223829174354363,0.305276612503734,

0.733201186028048,0.463435732088311,0.846148252608864  
"8445","DDHD1",146.188543624208,0.173709693257987,0.237139402283877,0.  
732521426574405,0.463850369645412,0.846684836954888  
"8446","SPARC",6208.55835471621,0.25967309069976,0.354578493385595,0.7  
32343036996811,0.463959217377966,0.846738234717956  
"8447","UBAP2",95.2423077861177,-0.159086413508015,0.217276308122549,-  
0.73218481519065,0.464055771268459,0.846738234717956  
"8448","PIP5KL1",4.51267939222921,-0.516979132879153,0.706146228493084  
,-0.732113423564388,0.464099341234642,0.846738234717956  
"8449","CETN2",247.17007150866,0.158257879171254,0.216150460248314,0.7  
32165358285367,0.464067645498427,0.846738234717956  
"8450","LINC01091",44.4208562756437,0.251360436909819,0.34343289590699  
4,0.731905533527838,0.464226228494894,0.846869504408141  
"8451","ZBTB80S",174.213875588523,-0.178557905486949,0.244136989685869  
,-0.731384071363783,0.464544591833024,0.846949128693799  
"8452","ATP5PB",548.137004347504,-0.14332320330781,0.195906584143804,-  
0.731589517188482,0.464419148446444,0.846949128693799  
"8453","RN7SL832P",43.0821243079997,-0.302304267255568,0.4133310623596  
91,-0.731385310191121,0.464543835359617,0.846949128693799  
"8454","KCNK5",2.97986067444404,-0.672871170633436,0.919895301626617,-  
0.731464949808552,0.464495205926743,0.846949128693799  
"8455","DNAJB1",1738.74344640304,0.164829496240538,0.225265789050311,0  
.731711179648876,0.464344871322018,0.846949128693799  
"8456","TSSK3",4.64171343932863,0.58151451119038,0.795563941873347,0.7  
3094628927131,0.464811960548874,0.847040697050457  
"8457","GNA14",7.83596665593384,0.385713427986107,0.527646198726452,0.  
731007688328051,0.464774456854653,0.847040697050457  
"8458","GNB3",4.59521470481382,0.559532293997347,0.7654948468956,0.730  
941947246913,0.464814612802453,0.847040697050457  
"8459","ATG4A",32.7952937037924,-0.203530077085321,0.278391830761175,-  
0.731092132009879,0.464722879821134,0.847040697050457  
"8460","PAQR8",26.4275985110869,0.247282769150293,0.338477769047848,0.  
73057314767203,0.465039918624206,0.847351104679922  
"8461","EMC1",108.267228773687,0.146134218309579,0.200358267867319,0.7  
29364552134937,0.465778695249667,0.847473399993347  
"8462","AL596325.2",30.9220048032711,0.435731985027053,0.5976306767796  
88,0.72909909406756,0.465941048742083,0.847473399993347  
"8463","CD247",11.4842768255186,0.468740923986166,0.6432368615937,0.72  
8722111517057,0.466171664332219,0.847473399993347  
"8464","SFT2D2",460.288767924315,0.198814281060196,0.272336368634398,0  
.73003206313255,0.465370586086844,0.847473399993347  
"8465","TOR3A",134.138467694491,-0.178795332902936,0.24521707825617,-0  
.72913083450148,0.465921634717571,0.847473399993347  
"8466","RBMS1",1098.30811229278,0.130563063096508,0.179203278224988,0.  
728575193432494,0.466261557271721,0.847473399993347  
"8467","CDYL",162.931107744551,-0.173149274373558,0.23749905677429,-0.  
729052471724604,0.46596956609532,0.847473399993347  
"8468","FRAT2",43.9481433281094,-0.235597856273144,0.323132952367811,-  
0.729105015588046,0.465937426812205,0.847473399993347  
"8469","AL139243.1",6.08469552359114,-0.547158663408446,0.750568765582



637,-0.728992050426862,0.466006525257311,0.847473399993347  
"8470","CCDC90B",339.944029055009,0.156169668294417,0.214256165993063,  
0.728892293813721,0.466067549039049,0.847473399993347  
"8471","PTS",110.297545727807,-0.206682842703634,0.283584908876593,-0.  
728821725818902,0.466110720043965,0.847473399993347  
"8472","ETNK1",178.938617348209,0.135292149276703,0.185467001769427,0.  
729467495489567,0.465715743808054,0.847473399993347  
"8473","TMEM263",375.777124059818,0.140588182654124,0.192930141388812,  
0.72869994103615,0.466185228891859,0.847473399993347  
"8474","GMPR2",171.04655450082,-0.1657236940676,0.227436334906862,-0.7  
28659711015242,0.466209843374835,0.847473399993347  
"8475","CSK",84.6489612501773,0.152995175234568,0.209542374719273,0.73  
0139550243897,0.465304888187567,0.847473399993347  
"8476","AC009090.6",2.48380261454338,0.839048615941622,1.1504796164415  
2,0.729303330498658,0.465816135461492,0.847473399993347  
"8477","CNTR0B",26.8007058362685,0.226765046176686,0.311213722658985,0.  
728647323900834,0.466217422497464,0.847473399993347  
"8478","AC005921.2",57.1008146862944,-0.335126250006816,0.459696894465  
516,-0.729015692821818,0.465992063224019,0.847473399993347  
"8479","CDK3",15.1440555426256,-0.301972444428223,0.413877482744225,-0.  
729617959464687,0.465623741281532,0.847473399993347  
"8480","ZNF77",23.2190609254151,-0.266910252538452,0.36624789763759,-0.  
728769377954397,0.466142746051652,0.847473399993347  
"8481","DGCR2",95.1567200612474,0.150077053170988,0.205530208125989,0.  
730194624621757,0.465271227815045,0.847473399993347  
"8482","TTLL4",18.6666253893043,-0.322151934689324,0.442488234023183,-  
0.728046329639685,0.466585226235706,0.847570440271152  
"8483","NDUFA10",486.581130030307,-0.159252792792479,0.218924962242569  
, -0.727430947851558,0.466962001820975,0.847570440271152  
"8484","ATG4B",109.639464752481,-0.132640176316722,0.182423189882056,-  
0.727101507228765,0.467163775505586,0.847570440271152  
"8485","NEK4",39.5110280367902,-0.226460696590631,0.311516855045453,-0.  
726961295746223,0.467249666002222,0.847570440271152  
"8486","C4orf3",1234.71033508708,-0.177500533793173,0.243958032144466,  
-0.727586348491538,0.466866839812976,0.847570440271152  
"8487","WDR70",139.101986389919,0.195532878289393,0.268887481057809,0.  
727192197718403,0.467108225152561,0.847570440271152  
"8488","DSE",662.158474184123,0.167472346358525,0.230320702024906,0.72  
7126762319505,0.46714830571831,0.847570440271152  
"8489","AL021408.1",2.85546685259751,0.690100744223993,0.9490144683767  
08,0.727176209867919,0.467118017873059,0.847570440271152  
"8490","ZSCAN21",41.9608239395929,0.215879355441625,0.296854836698592,  
0.727221957514593,0.467089997278907,0.847570440271152  
"8491","GTF2E2",115.534037726083,-0.156431365020564,0.215178538476933,  
-0.726984048352636,0.467235727656585,0.847570440271152  
"8492","CH25H",51.091208075481,-0.676880151449018,0.930240099976099,-0.  
727640263482954,0.466833826640132,0.847570440271152  
"8493","CYB561A3",152.302477996578,-0.148586523611518,0.20399667749491  
3,-0.728377174746991,0.466382731724851,0.847570440271152  
"8494","STT3A",195.899452633983,0.144876819388767,0.199020246870422,0.

727950154152371,0.466644099816265,0.847570440271152  
"8495","AC015961.2",3.84068697320899,0.576425117245098,0.7924662342920  
09,0.727381296895354,0.466992408626918,0.847570440271152  
"8496","TEAD2",86.6569704829802,-0.174206465563814,0.239551069593503,-  
0.727220570792805,0.467090846637169,0.847570440271152  
"8497","CLDND2",11.6487125165516,0.381673024082738,0.524127783145463,0.  
.728206052715223,0.466487461267992,0.847570440271152  
"8498","PKN0X1",82.9819707074029,-0.161723084200324,0.222093036982253,  
-0.728177192755697,0.466505125331732,0.847570440271152  
"8499","SMPDL3A",108.062767821127,0.220815273161571,0.303847179292698,  
0.726731357768698,0.467390539944567,0.847726223466937  
"8500","PLEKHA6",33.8382897182438,-0.491596333812057,0.676598368678958  
, -0.72657037996099,0.467489178717546,0.847741517896937  
"8501","ZBED8",20.4458997578396,0.276900419347018,0.381123055527065,0.  
726538096636753,0.467508961637487,0.847741517896937  
"8502","RRP9",45.8194641270725,-0.226755374163043,0.312196327487322,-0.  
.726323003182192,0.467640780744405,0.847880808653846  
"8503","AC034243.1",2.50277984688912,-0.977886646575909,1.346700069909  
18,-0.726135439082482,0.467755745413736,0.847989511413941  
"8504","MMACHC",13.808903821479,0.301168092252744,0.415131959567141,0.  
725475563401026,0.468160330992862,0.848359984375218  
"8505","IDUA",92.9874590282847,-0.240046739842718,0.330789402643548,-0.  
.72567844654137,0.468035917852901,0.848359984375218  
"8506","MIR4458HG",112.302679075733,0.226784676364629,0.31256055490975  
8,0.72557036645301,0.468102193052819,0.848359984375218  
"8507","SNX9",1275.75449094666,-0.146003624413134,0.201286202130172,-0.  
.725353366837897,0.468235273893244,0.848359984375218  
"8508","AC023794.3",6.24060383646935,-0.579872347134101,0.799368927146  
115,-0.725412669221889,0.468198903033655,0.848359984375218  
"8509","SOD2",2670.4786374745,-0.256840809412011,0.354192619851478,-0.  
725144441235706,0.468363422922575,0.848492439105828  
"8510","RASAL2",48.7534319133362,-0.223419022282059,0.308623133805799,  
-0.723921825065278,0.469113730128842,0.848570982054957  
"8511","HACL1",69.9645410652357,-0.192106127184732,0.265076665060169,-  
0.724719119056092,0.468624363459178,0.848570982054957  
"8512","B3GALNT1",53.0997995497178,-0.202586455310671,0.27978544292850  
4,-0.724077897656882,0.469017912951121,0.848570982054957  
"8513","PDCD10",283.369901262811,-0.151869821800718,0.209707149253345,  
-0.724199543703899,0.468943238666986,0.848570982054957  
"8514","KCNMB3",8.49180821684295,0.439005827472349,0.606604369987957,0.  
.723710294868242,0.469243611508017,0.848570982054957  
"8515","TRMT44",31.7781362172822,-0.20411787784623,0.282026735892547,-  
0.723753644136773,0.469216993060396,0.848570982054957  
"8516","THAP9-  
AS1",55.3286237822694,-0.227727613505763,0.314578975282801,-0.72391237  
6219802,0.469119531377762,0.848570982054957  
"8517","GFOD1",6.01873046896378,-0.418278124712876,0.577213265009857,-  
0.724650922056917,0.46866621066471,0.848570982054957  
"8518","IKKB",65.1505397523429,0.237178304377686,0.327757887886861,0.  
723638738053979,0.469287552514986,0.848570982054957

"8519", "AC048341.2", 8.26327003002281, -0.369838297918296, 0.510695845308327, -0.724185053228719, 0.468952133521404, 0.848570982054957  
"8520", "TMT3", 145.738915860848, 0.16135871501882, 0.222653082748293, 0.724709099138027, 0.468630511775625, 0.848570982054957  
"8521", "NME4", 334.194769339557, -0.213082611645118, 0.2941779654018, -0.724332331804936, 0.468861732172411, 0.848570982054957  
"8522", "MY01D", 104.566119962271, -0.253631316324765, 0.350072043174572, -0.724511771990559, 0.468751602675641, 0.848570982054957  
"8523", "AC006449.2", 5.77006897737831, 0.514055294371462, 0.710200899833334, 0.723816731986819, 0.469178255706623, 0.848570982054957  
"8524", "MED24", 84.5228579809984, -0.17877380651719, 0.24673546289062, -0.72455659361963, 0.468724096114285, 0.848570982054957  
"8525", "SOX9-AS1", 2.37135422843151, 0.727041621565739, 1.00394225601527, 0.724186692222145, 0.468951127434607, 0.848570982054957  
"8526", "EIF4E3", 83.9037722352375, -0.17230689159928, 0.238153583842496, -0.72351164664075, 0.46936560135106, 0.84861256683399  
"8527", "PAFAH2", 30.3282817675671, 0.227650142225096, 0.315196164919411, 0.722249086638796, 0.470141349013263, 0.848929155460513  
"8528", "CERT1", 327.881462251788, 0.153951421975342, 0.213158048670504, 0.722240717324813, 0.470146493685787, 0.848929155460513  
"8529", "C6orf136", 34.3856129249944, -0.227674838265273, 0.315203393020148, -0.722310873889354, 0.470103368944956, 0.848929155460513  
"8530", "CYP51A1", 161.508886914871, -0.12976157350919, 0.179494708503101, -0.72292701323253, 0.469724726358909, 0.848929155460513  
"8531", "BRCA2", 18.7426501733759, 0.327076824762128, 0.452863729378384, 0.722241158970899, 0.470146222202246, 0.848929155460513  
"8532", "GPR180", 55.7529206370148, 0.229635722234933, 0.317635274587504, 0.722954094230083, 0.469708087856866, 0.848929155460513  
"8533", "TRDV3", 2.50670434555578, 0.702202276046399, 0.971530721248055, 0.722779280869607, 0.469815498515118, 0.848929155460513  
"8534", "C14orf93", 34.7454224688425, -0.220412093244136, 0.305126551800864, -0.722362875152159, 0.47007140554905, 0.848929155460513  
"8535", "FUT8", 167.872811233257, 0.15529571513356, 0.214985281072207, 0.722355104307821, 0.470076181944715, 0.848929155460513  
"8536", "ACTL10", 8.23998168568657, -0.421083244931257, 0.58250823410151, -0.722879472391936, 0.469753936128889, 0.848929155460513  
"8537", "DID01", 164.497297034747, 0.157780789166849, 0.218325351524341, 0.72268652295864, 0.469872497315103, 0.848929155460513  
"8538", "AL135999.1", 10.1107737292329, 0.396711036187927, 0.549355329635988, 0.722139232636179, 0.470208879468194, 0.848942360857602  
"8539", "AL031848.2", 3.36878427611846, 0.750312502266417, 1.04365138402878, 0.718930203848346, 0.47218392535913, 0.84898466369217  
"8540", "KTI12", 44.5743567155914, -0.215200731427297, 0.298248884554243, -0.721547481221705, 0.470572738443872, 0.84898466369217  
"8541", "AL357078.2", 2.77711894477524, 0.683804260284236, 0.955327407983169, 0.715780008581396, 0.474127198452339, 0.84898466369217  
"8542", "PRMT6", 33.566764337273, 0.230732343844943, 0.321356815709556, 0.717994243674234, 0.472760836107739, 0.84898466369217  
"8543", "SLC16A1-

AS1",101.023896909464,0.222917932403845,0.309380557858515,0.7205298676  
389,0.471198816956022,0.84898466369217  
"8544","NMNAT2",3.07199051147635,0.615802548449759,0.85481326072739,0.  
720394239001103,0.471282296064966,0.84898466369217  
"8545","LDAH",29.9862118456112,0.211589279694304,0.294681850562237,0.7  
18026167171828,0.472741152589261,0.84898466369217  
"8546","CAD",45.6449980921597,-0.215357654185574,0.2996135175484,-0.71  
8784839708659,0.472273500020355,0.84898466369217  
"8547","ZNF513",23.8110930137562,-0.278868265659237,0.388542544917985,  
-0.717729034585135,0.472924377236345,0.84898466369217  
"8548","SNRNP200",266.03217605721,0.127666171153409,0.177327505834316,  
0.719945676519538,0.471558443316468,0.84898466369217  
"8549","TMEM87B",87.0722137999006,0.170726678873165,0.238634677497555,  
0.715431137936415,0.474342677609291,0.84898466369217  
"8550","CCDC173",3.94958688649835,-0.559382582238231,0.777047471046165  
, -0.7198821218543,0.471597576509816,0.84898466369217  
"8551","STK36",26.0660801702094,0.291717021070633,0.40417362284649,0.7  
2176165039209,0.47044103112114,0.84898466369217  
"8552","MFF",353.448625867729,-0.14416860124971,0.200842194391319,-0.7  
17820285157876,0.472868104076604,0.84898466369217  
"8553","CAPN10-  
DT",5.63726271751534,-0.468098348380911,0.652971010053432,-0.716874625  
632472,0.473451460020193,0.84898466369217  
"8554","SACM1L",94.351537186323,0.176537844504324,0.246024251257238,0.  
717562775223078,0.473026916913252,0.84898466369217  
"8555","DALRD3",202.45817600567,-0.159837725504264,0.223567906944088,-  
0.71494038517898,0.474645880976005,0.84898466369217  
"8556","STAG1",319.59243907555,0.146842513473654,0.203788148208809,0.7  
20564540991823,0.47117747689778,0.84898466369217  
"8557","ZBTB38",533.819014634321,0.135660257274426,0.18861553912673,0.  
719242210384782,0.47199169579651,0.84898466369217  
"8558","RARRES1",296.466226344594,-0.447191416621498,0.625769211371257  
, -0.714626748160972,0.474839712082612,0.84898466369217  
"8559","PRKCI",115.762686008526,0.167760761363179,0.234416773112011,0.  
715651696489393,0.474206443868536,0.84898466369217  
"8560","LSM6",341.256683432971,-0.167306333787519,0.233253296158336,-0.  
.717273181314226,0.47320555180202,0.84898466369217  
"8561","AC025171.4",3.72590821829193,0.623000984880065,0.8693774068617  
89,0.716605906667077,0.473617298854072,0.84898466369217  
"8562","PCDHGB2",3.86630210450111,0.608059048907309,0.845152546628462,  
0.719466623313173,0.471853459979878,0.84898466369217  
"8563","ADRB2",3.49386101250724,-0.607465822297404,0.846429242030755,-  
0.717680571668307,0.472954265248212,0.84898466369217  
"8564","TNIP1",146.927684965794,-0.141148734869195,0.197596295230283,-  
0.714328852697857,0.475023854968859,0.84898466369217  
"8565","RPL26L1",190.922010276591,-0.181191723784295,0.252280890013749  
, -0.718214224527351,0.472625208586739,0.84898466369217  
"8566","FAM153CP",23.6633084076402,0.35283406056909,0.493470740932161,  
0.715005027253673,0.474605936868212,0.84898466369217  
"8567","HMGNA4",231.262389085142,-0.150351619314389,0.210345578825905,-

0.714783834077299,0.474742625836979,0.84898466369217  
"8568","PSORS1C1",44.8273049029255,0.207288092427829,0.29017846710042,  
0.714346913811817,0.475012689447626,0.84898466369217  
"8569","LHFPL5",3.72587585156886,0.955034282858323,1.33506319855986,0.  
715347620913022,0.474394269688095,0.84898466369217  
"8570","HDAC2",245.638049871483,0.121063305763935,0.168915067461294,0.  
716711111586754,0.473552368254411,0.84898466369217  
"8571","ENPP1",115.199788550662,0.335785837247672,0.466446242579267,0.  
719881106536321,0.471598201696939,0.84898466369217  
"8572","AL358852.1",7.85775056840222,-0.400842832256291,0.556637810466  
667,-0.720114273085829,0.471454640225974,0.84898466369217  
"8573","TBP",41.2017724802907,0.19716649006316,0.273596466488902,0.720  
647063148963,0.471126689963875,0.84898466369217  
"8574","AC073332.1",54.9903536791602,-0.255292674732156,0.356634850440  
59,-0.715837710242745,0.474091564337833,0.84898466369217  
"8575","HOXA1",3.79362415475692,0.61743813690523,0.856043106099128,0.7  
21269913286039,0.470743464303162,0.84898466369217  
"8576","PTCD1",26.9810273309319,0.229571837786712,0.31859319945986,0.7  
20579843436476,0.471168059026332,0.84898466369217  
"8577","PCOLCE",3480.17281289322,0.263435000394649,0.367663823363327,0.  
.716510528517027,0.473676168777638,0.84898466369217  
"8578","SH2B2",3.8210105296225,0.670254301117732,0.936523984971083,0.7  
156830063871,0.47418710623664,0.84898466369217  
"8579","CHMP7",70.7537886325929,0.149692215823681,0.207670324218742,0.  
720816594218864,0.471022364270201,0.84898466369217  
"8580","EXT1",269.737415930578,0.157888714244686,0.221005719388621,0.7  
14410082605379,0.474973639140767,0.84898466369217  
"8581","GAS1RR",59.0036646264301,0.2203636372579,0.306650128850896,0.7  
186158312852,0.472377656264292,0.84898466369217  
"8582","GSN-  
AS1",4.26871124681455,0.566943175924561,0.790977878541714,0.7167623663  
12704,0.473520736525439,0.84898466369217  
"8583","RSU1",288.672278937708,0.137594717302162,0.191154826727656,0.7  
19807705918918,0.471643399704697,0.84898466369217  
"8584","MALRD1",4.12302664137119,0.555644136448729,0.769674611056841,0.  
.721920833124238,0.470343151921771,0.84898466369217  
"8585","AL137026.3",27.0097895200212,0.406937329209013,0.5647014687446  
4,0.720623819367169,0.471140994669878,0.84898466369217  
"8586","FAM13C",53.1262324138918,-0.328880993131716,0.458801554862275,  
-0.716826239245072,0.473481319127573,0.84898466369217  
"8587","ACCS",67.654414647905,0.206813348688853,0.289340693274001,0.71  
4774497664607,0.474748395860274,0.84898466369217  
"8588","DLG2",27.9418415636196,0.265674669494092,0.371608398275816,0.7  
14931822657309,0.474651172131042,0.84898466369217  
"8589","HIKESHI",357.979830515725,-0.193747809746936,0.270220313287349  
, -0.716999426837712,0.473374450318455,0.84898466369217  
"8590","IGSF9B",4.36942292888878,0.696097982074363,0.971171339645821,0.  
.716761248667228,0.473521426265222,0.84898466369217  
"8591","HIST4H4",7.45073947179633,0.430475294099795,0.596658172271744,  
0.721477244601852,0.470615936194612,0.84898466369217

"8592", "AC079630.1", 14.5371010797494, -0.317452126690899, 0.443765367588664, -0.715360300457589, 0.474386436786357, 0.84898466369217  
"8593", "RPAP3", 108.576675251747, 0.142034682290408, 0.198409081045526, 0.715867850110235, 0.474072951810945, 0.84898466369217  
"8594", "FKBP11", 245.86604476236, 0.200901119769168, 0.279064732256407, 0.719908668303445, 0.471581230563189, 0.84898466369217  
"8595", "CDK2", 38.7532489101053, -0.217967487629016, 0.304451080003123, -0.715935997424547, 0.474030869704979, 0.84898466369217  
"8596", "HSPB8", 298.131505741424, -0.170056243817295, 0.237577326011819, -0.715793239498094, 0.474119027465686, 0.84898466369217  
"8597", "NRAV", 13.3906562233079, -0.355503448798516, 0.497069025579736, -0.715199359654103, 0.474485864675217, 0.84898466369217  
"8598", "MICU2", 174.151202783267, -0.154839214871591, 0.215470448027474, -0.71860998243178, 0.472381261012913, 0.84898466369217  
"8599", "RPL21", 14624.3934014997, -0.167879562447402, 0.233282333002564, -0.719641133070961, 0.471745979374783, 0.84898466369217  
"8600", "NOVA1", 5200.3182906315, -0.162830383869273, 0.227032420180074, -0.717212034035145, 0.473243275011213, 0.84898466369217  
"8601", "ARHGAP5-  
AS1", 10.0125693005986, -0.404035247096294, 0.56115873418093, -0.720001708047947, 0.471523943909722, 0.84898466369217  
"8602", "AC090825.1", 13.195005436251, -0.375713466693566, 0.52275870961493, -0.718712973659149, 0.472317787969629, 0.84898466369217  
"8603", "ANKRD11", 689.692966901167, 0.163431212270988, 0.226496374905551, 0.721562154533994, 0.470563714167479, 0.84898466369217  
"8604", "TCF25", 875.98520007993, -0.102411365103532, 0.143033678591003, -0.715994765095653, 0.473994581334179, 0.84898466369217  
"8605", "NT5M", 7.88054203680196, -0.482917394665991, 0.671913580622485, -0.718719502913751, 0.472313764176916, 0.84898466369217  
"8606", "AC073508.3", 21.0637088774366, 0.256024971076583, 0.356073966824129, 0.719021874472048, 0.472127441927454, 0.84898466369217  
"8607", "ZNF521", 292.101349027472, -0.121525978395204, 0.169989109208662, -0.714904495711135, 0.474668058857808, 0.84898466369217  
"8608", "MCOLN1", 145.04800429436, -0.143184834034631, 0.198941434176464, -0.719733597112927, 0.471689036217541, 0.84898466369217  
"8609", "NUDT19", 37.7959479815579, 0.21029217696316, 0.294346614472404, 0.714437220010477, 0.47495686361359, 0.84898466369217  
"8610", "MYP0P", 45.6340053454455, -0.212301975222217, 0.296717180528009, -0.715502805885475, 0.474298407673937, 0.84898466369217  
"8611", "BBC3", 44.5881196155573, 0.234340294350198, 0.324574540503614, 0.721992223994503, 0.470299258343594, 0.84898466369217  
"8612", "MAMSTR", 13.1651688026658, -0.341509173449088, 0.476897308979434, -0.716106312656537, 0.473925706179383, 0.84898466369217  
"8613", "PTOV1", 304.429096662887, -0.13154354888423, 0.183327338057724, -0.717533731072945, 0.473044831011066, 0.84898466369217  
"8614", "ZNF83", 213.562138477168, 0.165049568885666, 0.229326512463583, 0.719714293443835, 0.471700923897365, 0.84898466369217  
"8615", "EPN1", 310.705711523772, -0.130370953418062, 0.182421637564253, -0.71466825514129, 0.474814057820166, 0.84898466369217  
"8616", "DTD1", 289.048168503954, -0.202110062882919, 0.282303574143212, -0

.715931647327956,0.474033555901009,0.84898466369217  
"8617","EDEM2",91.5917690863717,0.218015554590397,0.303135366346236,0.  
719201976391576,0.472016481838654,0.84898466369217  
"8618","AURKA",5.02807149278301,-0.535183572993152,0.744661614331224,-  
0.718693649160092,0.472329697215884,0.84898466369217  
"8619","AP000692.2",52.8773683991296,-0.318690157018855,0.445036638245  
488,-0.716098697570741,0.473930407946882,0.84898466369217  
"8620","IL2RB",8.40496571879842,0.495183792599678,0.69053993895149,0.7  
17096527901863,0.473314538003206,0.84898466369217  
"8621","AL592156.2",2.38981488142034,-0.738852341498729,1.025711755100  
76,-0.72033135802967,0.471321001923176,0.84898466369217  
"8622","PRICKLE3",17.6901228108148,-0.262056435239437,0.36327464027512  
4,-0.721372774716589,0.470680192539719,0.84898466369217  
"8623","ZDHC15",25.7235679469686,-0.243098103585573,0.339191943006894  
,-0.716697753580286,0.473560612306373,0.84898466369217  
"8624","HMG5",36.6942347685689,-0.218801278789626,0.30368512905124,-0.  
.720487300360063,0.471225016138136,0.84898466369217  
"8625","WDR44",57.7692093502204,0.180824097604894,0.252004484415163,0.  
717543173981763,0.473039006692535,0.84898466369217  
"8626","LSM14A",355.13420060822,0.0983100270256469,0.137646545931232,0.  
.714220806345279,0.475090653073511,0.849005612929303  
"8627","MTERF1",32.1366053008728,0.219721542826268,0.307815184542603,0.  
.713809954348946,0.475344703481917,0.849361145725484  
"8628","NPIPA1",74.2123277552236,0.265708621686369,0.372387205688771,0.  
.713527794798728,0.475519220054039,0.849574498972301  
"8629","PABPC4L",9.07789823198288,0.433873154330384,0.608234602476097,  
0.713331915948394,0.475640392405565,0.849594049702408  
"8630","DUSP1",8435.50030591292,-0.207387567756382,0.290723744026585,-  
0.713349260311598,0.475629662349129,0.849594049702408  
"8631","SCARB1",22.8704769120769,0.266693652188868,0.373982718853647,0.  
.713117582027191,0.475773000623801,0.849634013509718  
"8632","OFD1",143.939269493444,0.145382204408641,0.203860696649088,0.7  
1314484252397,0.475756133452027,0.849634013509718  
"8633","ZSCAN25",27.3866447724553,0.239246420906243,0.335658605185828,  
0.712767130679673,0.475989868245935,0.849824394140732  
"8634","CNKSR2",72.3180473449627,-0.406209143148961,0.569883383271507,  
-0.712793450507456,0.475973579029194,0.849824394140732  
"8635","TRAM2",459.135647155398,0.219324255886347,0.307814113750186,0.  
71252176586141,0.4761417380723,0.849898667483153  
"8636","GCSH",323.051454331762,-0.203789983598744,0.285994547260463,-0.  
.712565975648294,0.476114372234204,0.849898667483153  
"8637","MFAP3L",2.59983130532575,-0.706327458167207,0.991894946722011,  
-0.712099058979441,0.47640343696289,0.849972104257286  
"8638","TEP1",26.4119061493646,0.256967696078584,0.360836209438861,0.7  
12144982562022,0.476375001742599,0.849972104257286  
"8639","AC026401.3",13.2383280973659,0.28889604507003,0.40564298846721  
7,0.712192872263532,0.476345350120321,0.849972104257286  
"8640","NPIPA9",2.90052195215411,-0.64069288912941,0.899397887896984,-  
0.712357564711998,0.476243386056139,0.849972104257286  
"8641","RRAGB",81.0333620362259,0.163536298378302,0.229724940341582,0.

711878728252741,0.476539875505336,0.850117137011314  
"8642","ATE1",119.899483215201,0.151582827988587,0.212979366103202,0.7  
117254162318,0.47663482572485,0.850188132208813  
"8643","VANGL2",19.4675543962612,0.278896429978251,0.392253742387008,0  
.711010246278504,0.477077886412244,0.850191401045635  
"8644","FRMD4B",38.6074804637715,-0.217039117983842,0.305182422857554,  
-0.711178304279818,0.476973751188973,0.850191401045635  
"8645","ARF5",456.3661036825,-0.304100874899121,0.427680838549837,-0.7  
1104629314293,0.477055549335577,0.850191401045635  
"8646","FNTA",404.339153874099,-0.129878716468893,0.182581626743027,-0  
.711346036212556,0.476869830419592,0.850191401045635  
"8647","JMJD1C-  
AS1",6.2465568654151,-0.423578886883464,0.595632883330439,-0.711140870  
05246,0.47699694580361,0.850191401045635  
"8648","LGR4",200.561620463093,-0.274332720768915,0.385731685351898,-0  
.711200897376747,0.476959752583198,0.850191401045635  
"8649","C11orf52",12.3719183224221,-0.363904716479462,0.51170090429574  
, -0.711166842631065,0.476980852873433,0.850191401045635  
"8650","AP2S1",797.122240366614,-0.173453756378461,0.243914491224735,-  
0.711125261592788,0.477006617140804,0.850191401045635  
"8651","SSR1",451.248330035939,0.101657059238549,0.14300654921603,0.71  
0855969854795,0.477173492993314,0.850263483353594  
"8652","SLC44A3",6.89402274541198,-0.41083373034637,0.578287214968408,  
-0.710431978629881,0.477436298429923,0.85033859506612  
"8653","TNFAIP8L3",8.17987618285347,-0.457867212749013,0.6444170858175  
58,-0.710513769460545,0.477385595285057,0.85033859506612  
"8654","RMI2",8.45617564889125,-0.432241343756329,0.608344222411683,-0  
.710520997541125,0.477381114650439,0.85033859506612  
"8655","TANG02",43.6542392148773,-0.181546275403086,0.255506330213906,  
-0.710535332925406,0.477372228317988,0.85033859506612  
"8656","AL592435.1",6.73688483876295,0.417016309405241,0.5871764635074  
51,0.710206105527848,0.477576335254635,0.850476774856275  
"8657","ZSCAN22",12.1771653741456,0.329345790387189,0.46378313139694,0  
.710128868626984,0.477624225749645,0.850476774856275  
"8658","SZT2",57.5880553840596,0.237888839164303,0.335498663853298,0.7  
09060466685862,0.478286954396497,0.850534954700246  
"8659","CNRIP1",300.128227743848,0.143540488594649,0.2023982150124,0.7  
09198391823046,0.478201371331306,0.850534954700246  
"8660","IL1RAP",16.7771545506649,0.279494665430199,0.393717607341662,0  
.709886121977922,0.477774757138678,0.850534954700246  
"8661","CLEC4E",4.3223804619301,-0.563849028196429,0.795131448720131,-  
0.709126810546883,0.478245786736959,0.850534954700246  
"8662","PPFIA2",2.3807394435011,0.828512335328589,1.16809544112132,0.7  
09284794856535,0.478147762189299,0.850534954700246  
"8663","RAB35",102.927840533905,0.126263927346457,0.178106253578298,0.  
708924727850442,0.478371189025476,0.850534954700246  
"8664","SEMA4B",9.79036452782436,0.370277102093427,0.522114377997018,0  
.709187713837564,0.478207996762427,0.850534954700246  
"8665","RPGRIP1L",39.2055802605994,0.20493891293343,0.288753043009328,  
0.70973767340284,0.477866825447098,0.850534954700246



"8666", "CENPT", 100.19273100067, 0.15918731627918, 0.22453650620998, 0.708959620714474, 0.478349534997574, 0.850534954700246  
"8667", "AP2A1", 279.797505271035, -0.121458239496365, 0.171225181304999, -0.709347997593967, 0.478108549853489, 0.850534954700246  
"8668", "SDCBP2-  
AS1", 14.5577990081436, 0.30777684306848, 0.434148967673114, 0.708919900738348, 0.478374184706528, 0.850534954700246  
"8669", "LINC00310", 11.0025863828945, -0.508662547739975, 0.717322944458679, -0.709112334506229, 0.478254769237295, 0.850534954700246  
"8670", "THOC2", 385.413537134377, 0.145536162687578, 0.205137116694594, 0.709457971490604, 0.478040323876664, 0.850534954700246  
"8671", "H2AFJ", 1309.6068999795, 0.171698811410353, 0.242285625875339, 0.708662805686603, 0.478533751391501, 0.850720537158343  
"8672", "RAB11FIP1", 14.7595194157609, -0.392417588996472, 0.554018865221341, -0.708310878258077, 0.478752223165966, 0.850821768409695  
"8673", "ACTR6", 113.438683816211, -0.170343136143109, 0.240436727393603, -0.708473859171488, 0.478651040053396, 0.850821768409695  
"8674", "MLST8", 83.311722808541, -0.177671701809405, 0.250840902389147, -0.708304347963834, 0.478756277598812, 0.850821768409695  
"8675", "CACNA2D3", 13.9277653174348, -0.325228542672281, 0.459707643049384, -0.70746820852257, 0.479275562427921, 0.850850809265934  
"8676", "B4GALT4", 107.765496470113, 0.127731749664468, 0.180531977802094, 0.707529775165331, 0.479237315951138, 0.850850809265934  
"8677", "ATG12", 372.670560869115, 0.101388424550522, 0.143222611790361, 0.707907943327602, 0.479002426584521, 0.850850809265934  
"8678", "DDX58", 73.4958574751568, -0.198979556148065, 0.281287199160836, -0.707389304389539, 0.479324581749294, 0.850850809265934  
"8679", "HSDL2", 166.418277490886, -0.149182132194648, 0.210804309211148, -0.707680657728981, 0.479143591614413, 0.850850809265934  
"8680", "ZNF488", 3.27468619655959, 0.621473916289748, 0.878516993943975, 0.707412515152075, 0.479310161741141, 0.850850809265934  
"8681", "CYFIP1", 298.748162624932, 0.098620349962192, 0.139343481812948, 0.707750005088709, 0.479100518189033, 0.850850809265934  
"8682", "GFER", 132.911649706998, -0.182455112203539, 0.257829127623327, -0.707659037151516, 0.479157021142383, 0.850850809265934  
"8683", "EEF2", 4094.53131919667, -0.100510986378388, 0.142016152293856, -0.70774334295731, 0.479104656118084, 0.850850809265934  
"8684", "MX2", 289.470886651795, 0.244429008870845, 0.345321639401255, 0.707829979304671, 0.479050846775215, 0.850850809265934  
"8685", "ELF3-  
AS1", 4.46557563394125, 0.647990457625784, 0.916197614854076, 0.707260581254614, 0.479404557079656, 0.850872621578736  
"8686", "LAG3", 9.32214647144568, 0.374797735848747, 0.52998028463303, 0.707191846029263, 0.479447265068628, 0.850872621578736  
"8687", "LRRRC42", 96.5904051930574, -0.183450803931858, 0.259887035129146, -0.705886708972212, 0.480258593607326, 0.85100250933687  
"8688", "S100A16", 800.673617553571, -0.16916814947542, 0.239502081179059, -0.706332690900269, 0.479981268186749, 0.85100250933687  
"8689", "GALNT5", 31.8115584951126, -0.883924960141973, 1.25166192548331, -0.706201045302752, 0.480063120424825, 0.85100250933687

"8690", "AL121933.2", 16.3746417699216, -0.380883997561007, 0.539604452076  
636, -0.70585777432932, 0.480276589083989, 0.85100250933687  
"8691", "COG5", 92.0198428624778, 0.134454020426848, 0.190472024468587, 0.7  
05899046340122, 0.480250920674119, 0.85100250933687  
"8692", "HACD1", 8.66731757604813, -0.485069632054487, 0.687148516753916, -  
0.705916727210519, 0.480239924592844, 0.85100250933687  
"8693", "WAC", 574.233546831757, 0.131229610606904, 0.185732817745121, 0.70  
6550475032305, 0.479845874985961, 0.85100250933687  
"8694", "TM9SF3", 681.09775462672, 0.0891468731051422, 0.126136395135977, 0  
.706749808483431, 0.479721970562319, 0.85100250933687  
"8695", "AL132800.1", 3.89695368533361, 0.675569122882636, 0.9560767583888  
79, 0.706605528222507, 0.479811652523568, 0.85100250933687  
"8696", "PNN", 556.341224870193, 0.103828753998583, 0.147101469423868, 0.70  
5830841834786, 0.480293339684124, 0.85100250933687  
"8697", "ATXN1L", 91.8815743353123, 0.150047924861992, 0.212317756518347, 0  
.706713971184158, 0.479744245516034, 0.85100250933687  
"8698", "ASPSCR1", 80.5681093234132, -0.159491323656327, 0.22586097020923,  
-0.706148226975999, 0.480095962995721, 0.85100250933687  
"8699", "NCOA3", 201.475636647581, 0.138679698367737, 0.196355219209298, 0.  
70626947898908, 0.48002057000515, 0.85100250933687  
"8700", "USP16", 430.054000635049, -0.118157148713002, 0.167257584626222, -  
0.70643821012394, 0.479915665831665, 0.85100250933687  
"8701", "KHDC4", 66.3615417479662, 0.182404344134428, 0.258479240079302, 0.  
705682762292499, 0.480385443087197, 0.851067877851872  
"8702", "IFT74", 130.663467049787, -0.147718641606931, 0.209363178057016, -  
0.705561708500157, 0.480460744002423, 0.851103466880872  
"8703", "GOLGA6L10", 13.728917706806, -0.370784516251126, 0.52559708064406  
3, -0.705453911191381, 0.480527804201215, 0.851124451541046  
"8704", "USP6NL", 33.3947851711946, -0.213540072479962, 0.302806038166589,  
-0.705204142469851, 0.480683203745252, 0.851301882552051  
"8705", "INTS12", 53.970537107472, -0.194542856310781, 0.275973610513474, -  
0.704932822920338, 0.480852042667714, 0.851405265072688  
"8706", "POLR2K", 424.110964296198, -0.190868182870341, 0.270754713227469,  
-0.704948699120101, 0.480842162208137, 0.851405265072688  
"8707", "TMEM175", 88.594789407281, -0.192340857644663, 0.272910219295504,  
-0.704777044044653, 0.480948996600538, 0.851479129734386  
"8708", "MANEA", 58.2945343264404, 0.170578777943814, 0.242162045185005, 0.  
704399311681962, 0.481184134536575, 0.851558187396424  
"8709", "MAD1L1", 81.5050350254022, -0.175678137265996, 0.249512970675, -0.  
704084187650605, 0.4813803467384, 0.851558187396424  
"8710", "TOR1A", 145.64188851883, -0.150326251105872, 0.213468755805633, -0  
.704207276322661, 0.481303700306954, 0.851558187396424  
"8711", "SLC25A15", 9.09899757351615, -0.436601807553352, 0.61985182948931  
5, -0.704364796201473, 0.481205623501447, 0.851558187396424  
"8712", "UBALD1", 45.3807081831312, -0.211094579900627, 0.299701034815009,  
-0.704350520614404, 0.481214511480292, 0.851558187396424  
"8713", "AC005562.1", 66.8487648474131, 0.163276208575279, 0.2318226329435  
45, 0.704315219364458, 0.481236490418135, 0.851558187396424  
"8714", "PTGIS", 1293.86995055069, -0.233630229587253, 0.331798900384601, -  
0.704132018871801, 0.481350561791564, 0.851558187396424

"8715", "PSAP", 3680.81356718292, 0.0978372602478759, 0.138994295438357, 0.703894069460324, 0.481498745022851, 0.851630053427177  
"8716", "CRY1", 64.0258158572296, -0.241861718498679, 0.343630927328098, -0.703841532481591, 0.481531465823631, 0.851630053427177  
"8717", "RPA2", 223.244192567645, -0.170159803186044, 0.242094417292422, -0.702865456746616, 0.482139600119426, 0.851630793610742  
"8718", "DYNCL1I1", 236.386920513395, -0.135265392170175, 0.192302977328651, -0.703397285102887, 0.481808197974363, 0.851630793610742  
"8719", "RBP1", 13.569232788916, -0.47520276305924, 0.675939696738727, -0.703025381335048, 0.482039932096003, 0.851630793610742  
"8720", "NNT", 116.606275748517, 0.153559771453803, 0.218380960950681, 0.703173805927533, 0.481947441112681, 0.851630793610742  
"8721", "SERF1A", 4.61378953739502, -0.546946197816107, 0.777419685339042, -0.703540453284994, 0.481719005696945, 0.851630793610742  
"8722", "NEU1", 588.574898160214, 0.203951152082553, 0.289983216623868, 0.703320538536872, 0.48185601397911, 0.851630793610742  
"8723", "RAB21", 310.059722345854, 0.110400544735783, 0.157066635453061, 0.702889855743908, 0.482124393479276, 0.851630793610742  
"8724", "DCN", 80454.3198075831, 0.129976655994076, 0.184826312661575, 0.703236753048624, 0.481908218444841, 0.851630793610742  
"8725", "FBXL3", 349.063962899853, 0.119616896171219, 0.170094917453061, 0.703236157566131, 0.481908589484843, 0.851630793610742  
"8726", "PSKH1", 61.7268291017566, 0.170901198438505, 0.243139235779929, 0.702894363759503, 0.482121583893551, 0.851630793610742  
"8727", "CXorf56", 53.6099119435762, 0.207234791940201, 0.294593165927267, 0.703460962130283, 0.481768526744301, 0.851630793610742  
"8728", "TAP1", 131.782120661537, 0.199525360039386, 0.283932349360528, 0.702721477453191, 0.482229340317864, 0.85169171413839  
"8729", "ZNF512", 67.5109506005566, 0.154622057563571, 0.220128000404711, 0.70241885302776, 0.482417991317166, 0.851892816592774  
"8730", "WAKMAR2", 8.37359934390104, 0.401144592431298, 0.571136911236378, 0.702361525825592, 0.482453732653579, 0.851892816592774  
"8731", "RAE1", 76.1919442138758, -0.182900457590688, 0.260507927695624, -0.702091714477065, 0.482621969121758, 0.852092275113034  
"8732", "RRP12", 23.5047679164799, -0.257375724226082, 0.366695949581073, -0.701877739637206, 0.482755412306558, 0.852230265770224  
"8733", "RPS19", 9669.98186149051, -0.156236793428639, 0.222644365672748, -0.701732527371845, 0.482845983842894, 0.852292550204765  
"8734", "CD34", 2459.8592083425, -0.148813025043432, 0.212092326960914, -0.701642662777032, 0.482902038651769, 0.852293900368333  
"8735", "FBXL14", 31.4358050859668, -0.196680369486689, 0.280409267685128, -0.701404668648619, 0.48305050924633, 0.852425880793393  
"8736", "THAP2", 65.7758760960454, 0.207607076235148, 0.296012551989599, 0.701345516734854, 0.483087414506071, 0.852425880793393  
"8737", "CBWD5", 34.4587442979813, -0.239676391915836, 0.34195980754295, -0.700890533416658, 0.483371332702351, 0.852577344307495  
"8738", "LINC00937", 4.81852657919729, -0.495133963328232, 0.706472903993906, -0.700853437589876, 0.483394485192832, 0.852577344307495  
"8739", "AC087500.1", 11.5965836558463, 0.327609950132445, 0.467278856301256, 0.701101592153431, 0.483239616796546, 0.852577344307495

"8740", "NPB", 23.9878295481705, -0.350493097904032, 0.50004552681082, -0.700922374287397, 0.483351460449558, 0.852577344307495  
"8741", "LINC01551", 4.41853668662939, 0.72519805913731, 1.03499529369181, 0.700677639364469, 0.48350421371857, 0.852673315921721  
"8742", "POLR3B", 26.0782158369725, 0.253612979435618, 0.36200925344461, 0.700570432999782, 0.483571135684034, 0.852676328167498  
"8743", "NTAN1", 765.709512432821, -0.16966061383821, 0.242200106858657, -0.70049768366626, 0.483616551227274, 0.852676328167498  
"8744", "SETDB1", 47.3653518432417, 0.182223049910263, 0.260257142906923, 0.700165412848755, 0.483824008801676, 0.852719271806619  
"8745", "AL590399.3", 2.50374569079408, 0.682651200178495, 0.975025654814864, 0.700136654668964, 0.483841966612317, 0.852719271806619  
"8746", "KEAP1", 156.94013986966, 0.1565794601756, 0.223641740321734, 0.70013522498234, 0.483842859377895, 0.852719271806619  
"8747", "RTN2", 154.807369059262, 0.199310868253915, 0.284687398010892, 0.700104288586351, 0.483862177780895, 0.852719271806619  
"8748", "QDPR", 205.808459616843, -0.183403728751325, 0.262003448815563, -0.700005017416513, 0.483924171035565, 0.852731035266717  
"8749", "ZBTB7A", 627.18461330944, -0.135353391020067, 0.193426952949359, -0.69976489292836, 0.484074142743179, 0.8528978066506  
"8750", "MST01", 23.8498271598156, -0.295378154523588, 0.422908615808639, -0.698444400237149, 0.484899317469698, 0.853236178973264  
"8751", "AL358115.1", 2.93270268525022, -0.60764214889337, 0.870386601079937, -0.698129024664941, 0.485096508055201, 0.853236178973264  
"8752", "IK", 412.260138202374, -0.148779449302159, 0.213078983404868, -0.6982361513311, 0.485029521554687, 0.853236178973264  
"8753", "CD24", 34.7604199600857, -0.398034980106863, 0.570169931119337, -0.698098862080389, 0.485115369678463, 0.853236178973264  
"8754", "HIBADH", 311.891600003939, -0.150005191699243, 0.214810093508279, -0.69831537824577, 0.484979984042815, 0.853236178973264  
"8755", "TAS2R4", 2.94065883139593, 0.653606982776671, 0.934847122305211, 0.699159217782007, 0.484452534039754, 0.853236178973264  
"8756", "COPS5", 322.094180706757, -0.17774187387832, 0.254593613528674, -0.698139562162666, 0.485089918716405, 0.853236178973264  
"8757", "AC067930.3", 2.52340055250959, 0.885011228348179, 1.26627929378009, 0.698906815183127, 0.484610268106673, 0.853236178973264  
"8758", "POLR2L", 1760.70703660093, -0.205013557410739, 0.293504127199359, -0.698503150081723, 0.484862588553671, 0.853236178973264  
"8759", "TAS2R30", 3.44562635089654, 0.623567170371646, 0.893310754564034, 0.698040594704323, 0.485151807246231, 0.853236178973264  
"8760", "TUBA1B", 2278.82347617494, -0.225014286900585, 0.322032585904368, -0.698731422687162, 0.484719892603727, 0.853236178973264  
"8761", "CLPTM1", 252.136190086538, -0.11819307203322, 0.169273123694188, -0.698238854779744, 0.485027831148114, 0.853236178973264  
"8762", "DHX34", 15.4136651753265, 0.280925183816366, 0.402414872692423, 0.698098412558139, 0.485115650782024, 0.853236178973264  
"8763", "ZFP28", 14.6361223453303, 0.339357840842452, 0.485915381566251, 0.698388760093579, 0.484934103668951, 0.853236178973264  
"8764", "KDM5C", 128.468657939955, 0.139300151780969, 0.199231829426488, 0.699186230342614, 0.484435654717057, 0.853236178973264

"8765", "ZXDA", 15.0608420128818, -0.295936991113049, 0.423460088437324, -0.698854506466317, 0.484642960897345, 0.853236178973264  
"8766", "MTOR", 40.566512444449, 0.205589109222208, 0.294895330960103, 0.697159594059569, 0.485702922545973, 0.853359226517876  
"8767", "PUS10", 14.3206652621975, 0.279735601440818, 0.401204529544516, 0.697239389989936, 0.48565299176895, 0.853359226517876  
"8768", "SLMAP", 129.410326815404, 0.188885539561408, 0.270899383993616, 0.69725348495388, 0.485644172403557, 0.853359226517876  
"8769", "RETREG1", 91.2807427938682, -0.321110123528348, 0.460462830197624, -0.697363831496521, 0.48557513042075, 0.853359226517876  
"8770", "PCDHGB5", 2.74564738110579, 0.717445228877828, 1.02894338283623, 0.697264048581784, 0.485637562688638, 0.853359226517876  
"8771", "EEF1A1", 42441.8065138766, -0.136925296162307, 0.19641625161265, -0.697117957593124, 0.485728976871238, 0.853359226517876  
"8772", "AL359715.1", 5.15839018208306, 0.571298688316041, 0.819602241520418, 0.69704383342857, 0.485775362484227, 0.853359226517876  
"8773", "COMP", 50.919089559254, -0.986232568927706, 1.41426971446729, -0.697344048903137, 0.485587507667128, 0.853359226517876  
"8774", "ZNF506", 142.307974259406, -0.134800347617829, 0.193234364302244, -0.697600285045489, 0.485427203286895, 0.853359226517876  
"8775", "AC008079.1", 3.76771846430949, 0.666548007392248, 0.955925326195586, 0.697280414198242, 0.485627322736541, 0.853359226517876  
"8776", "CACYP", 449.87513445091, -0.148688314437277, 0.214095210042571, -0.694496221600251, 0.487371069526453, 0.853600631302829  
"8777", "ZNF281", 84.776777745561, -0.172153360643629, 0.247203243130864, -0.69640413476491, 0.486175774361699, 0.853600631302829  
"8778", "RNASEH1-AS1", 45.8390294433178, -0.247194469390986, 0.355956976392297, -0.694450413351514, 0.487399787587548, 0.853600631302829  
"8779", "AC008074.2", 2.54940615210248, -0.647286656513319, 0.931578732583161, -0.694827644592602, 0.487163321376948, 0.853600631302829  
"8780", "ZC3H6", 250.369301613387, 0.131091692331521, 0.18824336166338, 0.696394768841525, 0.486181638177075, 0.853600631302829  
"8781", "PBRM1", 308.854775015683, 0.130613578713266, 0.187822254330491, 0.695410558130341, 0.486798045744098, 0.853600631302829  
"8782", "SLC25A26", 115.652876798114, -0.15030031586121, 0.215872786139104, -0.696244851189162, 0.486275503795393, 0.853600631302829  
"8783", "PACRGL", 60.611357269381, -0.146413933533067, 0.210847326508678, -0.694407351316549, 0.487426784828145, 0.853600631302829  
"8784", "LIAS", 86.9694658921613, -0.165573950726178, 0.237912523731292, -0.695944661211629, 0.486463486549151, 0.853600631302829  
"8785", "FGF10-AS1", 10.3788064651339, 0.454631633940593, 0.653000365902918, 0.696219569972161, 0.486291333697831, 0.853600631302829  
"8786", "CCDC125", 32.7080758292417, 0.20984825979257, 0.301661301611783, 0.695641962264785, 0.486653080221556, 0.853600631302829  
"8787", "SOBP", 328.621252046194, -0.121999363686393, 0.175751444847312, -0.694158524798375, 0.487582799520794, 0.853600631302829  
"8788", "AC073957.3", 2.69461120574082, 0.872337890514897, 1.25638093369037, 0.694325954113756, 0.487477818060316, 0.853600631302829

"8789","PLOD3",172.401632376955,0.113965738212529,0.16428467988356,0.6  
93708861308943,0.487864807723908,0.853600631302829  
"8790","LINC02680",2.87830248572388,0.792995570302318,1.14031727661022  
,0.695416606034094,0.48679425667508,0.853600631302829  
"8791","PGGHG",18.9347768192001,0.330049933828763,0.475821204715659,0.  
693642760259065,0.487906270672023,0.853600631302829  
"8792","PCNX3",46.1552251483395,-0.193826349567806,0.278432071201624,-  
0.69613514251901,0.486344200195009,0.853600631302829  
"8793","NDUFC2",1111.24451774242,-0.190887170848737,0.275168745248152,  
-0.693709493338685,0.487864411282249,0.853600631302829  
"8794","FBXW8",38.5213352946511,0.251982478831159,0.36323380548118,0.6  
93719788821293,0.487857953448924,0.853600631302829  
"8795","AL355001.2",39.9888566804053,-0.235490186682398,0.339366755987  
209,-0.693910592383639,0.48773828041381,0.853600631302829  
"8796","RASL11A",84.3228475510124,0.251071155763258,0.3608665753953,0.  
695745111578233,0.486588468781736,0.853600631302829  
"8797","IRS2",192.297899468835,0.214213630829407,0.308762338093984,0.6  
93781606110918,0.487819179572769,0.853600631302829  
"8798","ZNF710",18.6661969821105,0.278917401160461,0.401707102160769,0  
.694330271135793,0.487475111364311,0.853600631302829  
"8799","HNRNPA1P48",87.0604659632446,-0.223323326690851,0.321605048205  
82,-0.694402429118367,0.487429870794302,0.853600631302829  
"8800","CHMP1A",182.180292119168,-0.135684492104043,0.195555008845583,  
-0.693843092565242,0.487780614857166,0.853600631302829  
"8801","FANCA",5.44545415970011,-0.467719253651572,0.673033937919544,-  
0.694941558366829,0.487091927069527,0.853600631302829  
"8802","SLC25A35",17.4845385991749,-0.319366092795444,0.45874773561129  
9,-0.696169306143553,0.486322807357807,0.853600631302829  
"8803","TNFAIP1",56.0133993698933,0.179591703063825,0.258526396056692,  
0.694674531510673,0.487259292357096,0.853600631302829  
"8804","TMEM94",49.2414444810026,0.1802936442214,0.259143668106318,0.6  
95728533669713,0.486598852663579,0.853600631302829  
"8805","FAAP24",27.8100318555999,0.264395726118823,0.380615002592028,0  
.694653979265821,0.487272175241075,0.853600631302829  
"8806","TSKS",35.0886209671136,0.246922564851363,0.354976143956342,0.6  
95603265333042,0.486677320691561,0.853600631302829  
"8807","NDUFAF5",44.0808763647272,-0.181504316578225,0.261350786568885  
, -0.694485442194702,0.48737782725831,0.853600631302829  
"8808","SUSD2",8.30602584583464,-0.454016226649399,0.65351628131028,-0  
.694728256408716,0.487225616533517,0.853600631302829  
"8809","NDUFA6",411.220306540099,-0.182383875335999,0.262613995070622,  
-0.694494119732471,0.487372387207283,0.853600631302829  
"8810","KCND1",4.59335551214675,-0.491959814591199,0.707188395251184,-  
0.695655949524541,0.486644318505256,0.853600631302829  
"8811","PIN4",292.896124348174,-0.180033562403121,0.258765703832387,-0  
.695739658450783,0.486591884436486,0.853600631302829  
"8812","RAB40B",142.226082737348,0.15253881063539,0.220055723277122,0.  
693182655573533,0.488194931412992,0.85400872307436  
"8813","ZNF322",198.709289659025,0.142010897511581,0.204968913560565,0  
.692841148663351,0.488409245751794,0.854274265170304

"8814", "RECQL4", 3.83933328777363, -0.521684050680927, 0.753047109879093, -0.692764162875131, 0.488457565566725, 0.854274265170304  
"8815", "LYSMD3", 123.387655142294, 0.148319584393223, 0.214177811064255, 0.692506771155327, 0.488619135137207, 0.854459894287017  
"8816", "PEA15", 339.061588623812, -0.119225028162152, 0.172408245255459, -0.691527414976562, 0.489234158461833, 0.854913486113957  
"8817", "LAMB2", 1389.29323015847, 0.119437905552317, 0.172744203582858, 0.691414838096306, 0.489304882028873, 0.854913486113957  
"8818", "AC095057.3", 3.33849484618723, 0.668317091346105, 0.967609308703958, 0.690688985042183, 0.489761012939578, 0.854913486113957  
"8819", "PLA2G12A", 174.437503974142, 0.118108264149283, 0.170741626187719, 0.691736788423407, 0.489102639551138, 0.854913486113957  
"8820", "CNOT6", 53.6819727347268, 0.217519850433638, 0.314935220170285, 0.690681246498964, 0.489765877124382, 0.854913486113957  
"8821", "THSD7A", 11.2223258836932, 0.384366707247312, 0.556496648758666, 0.690690066336768, 0.489760333276686, 0.854913486113957  
"8822", "IMMP2L", 100.796446835073, -0.177551408491763, 0.256764461563659, -0.691495261495693, 0.489254357508253, 0.854913486113957  
"8823", "AC107375.1", 22.5715348285264, 0.32088825233424, 0.464257438077506, 0.691186023131996, 0.489448646186742, 0.854913486113957  
"8824", "SEPHS1", 139.032583688416, -0.141735663735869, 0.205147163506421, -0.690897506518207, 0.489629953228298, 0.854913486113957  
"8825", "CS", 97.3983585562556, 0.187088815252062, 0.270704619522869, 0.691117926180262, 0.489491435807682, 0.854913486113957  
"8826", "ZNF605", 64.997277518716, 0.177416092586544, 0.256840406762768, 0.69076394490535, 0.489713897067312, 0.854913486113957  
"8827", "TENT4B", 144.20776455107, -0.132966140762295, 0.192360208877244, -0.691235165205855, 0.48941776836529, 0.854913486113957  
"8828", "ATP5MC1", 556.263051205423, -0.197593754029761, 0.285680348611794, -0.691660294416216, 0.489150687411812, 0.854913486113957  
"8829", "RELCH", 56.1250556880389, 0.178073583058619, 0.257540180822092, 0.691440001673494, 0.489289073172576, 0.854913486113957  
"8830", "PALM", 690.836337444468, -0.107494265036914, 0.155580477170709, -0.69092386777402, 0.489613386022155, 0.854913486113957  
"8831", "GCDH", 64.866786899799, -0.194033530543794, 0.280436514202747, -0.691898239768853, 0.48900123613898, 0.854913486113957  
"8832", "WNK1", 423.185285893361, 0.153123226412934, 0.221755558742966, 0.690504568548005, 0.489876937941575, 0.854969138212732  
"8833", "DDX51", 59.0854405621971, -0.204878997259332, 0.296769150769948, -0.690364873598847, 0.489964760614896, 0.854969138212732  
"8834", "VIPAS39", 63.5004465776375, 0.178383954319608, 0.258514543954947, 0.690034500924235, 0.490172491241317, 0.854969138212732  
"8835", "COQ9", 115.338870281336, -0.147906522505667, 0.214353236161616, -0.690013013818694, 0.490186003472211, 0.854969138212732  
"8836", "AC010538.1", 3.27899980454816, -0.540325151942468, 0.782949524422012, -0.690114924511062, 0.490121918405312, 0.854969138212732  
"8837", "AC008736.1", 9.03061536228544, 0.35497151729721, 0.514119187482845, 0.690445962608728, 0.489913780978568, 0.854969138212732  
"8838", "ENTPD6", 75.5596799126976, -0.159946208983352, 0.231789940538122, -0.690048103951459, 0.49016393704033, 0.854969138212732

"8839", "ZC3H3", 40.29879665711, 0.224733701703217, 0.325808684497066, 0.68  
9771980909983, 0.490337591468809, 0.855136777066601  
"8840", "TRAF3IP3", 6.09955623655564, 0.539503341132129, 0.782350860598447  
, 0.689592570677873, 0.49045044071337, 0.85514009089431  
"8841", "ITGB1-  
DT", 5.15661021426096, 0.516186785812924, 0.748518066106833, 0.68961165960  
589, 0.490438433091659, 0.85514009089431  
"8842", "EGFL8", 35.3780838048485, -0.219146344763647, 0.317894732305004, -  
0.689367650651686, 0.490591935395548, 0.855193337568968  
"8843", "CLN3", 206.404965152635, -0.14370621683226, 0.208439885090981, -0.  
689437229201762, 0.49054816196099, 0.855193337568968  
"8844", "YAP1", 240.256783148568, 0.154842943177979, 0.224649078601143, 0.6  
89265872542915, 0.490655970080419, 0.855208251785353  
"8845", "FNBP1L", 69.9078787031919, 0.187024029847838, 0.271431885087069, 0  
.689027487643337, 0.490805969836094, 0.855237647191239  
"8846", "AP4B1", 27.180599217762, 0.203835579917828, 0.295853565629697, 0.6  
88974559032211, 0.490839277632235, 0.855237647191239  
"8847", "AC023632.2", 9.73759128037264, -0.334549366448215, 0.485544402837  
264, -0.689019097930664, 0.490811249372922, 0.855237647191239  
"8848", "ZC3H11B", 2.62956957357997, 0.644224176976921, 0.935495149711468,  
0.688645127850869, 0.491046614866578, 0.85526231477256  
"8849", "MSRB3", 136.072944189831, -0.156098668439603, 0.226634917668555, -  
0.688767071047239, 0.490969860833441, 0.85526231477256  
"8850", "USP14", 253.548065094871, -0.121417891901682, 0.176325861427554, -  
0.688599453980656, 0.491075364777939, 0.85526231477256  
"8851", "SMOX", 22.6363734100141, -0.256205706489439, 0.372057421093318, -0  
.688618723788817, 0.491063235078604, 0.85526231477256  
"8852", "CCNH", 164.135381229909, -0.13865796157436, 0.201393975245292, -0.  
688491110051719, 0.491143566651692, 0.855284464520542  
"8853", "HACD2", 77.5462773736037, 0.147329106977349, 0.214079392284043, 0.  
688198454813771, 0.491327816854104, 0.855400010881884  
"8854", "OTUD6B-  
AS1", 324.701388521229, -0.128078380137271, 0.186151457539956, -0.68803318  
4536198, 0.49143188429257, 0.855400010881884  
"8855", "TMEM254", 54.6368973956959, 0.2303861755047, 0.3347948635969, 0.68  
8141308470282, 0.491363799442347, 0.855400010881884  
"8856", "TACC2", 109.429467340186, -0.183694788742333, 0.266971223554342, -  
0.688069621499646, 0.491408939637394, 0.855400010881884  
"8857", "WHRN", 12.0630232761354, 0.304256498483802, 0.442412893074589, 0.6  
87720686369115, 0.49162869057556, 0.855645959717992  
"8858", "CCDC137", 90.479097356842, 0.181190471856182, 0.263590725449902, 0  
.687393198478143, 0.491834982536339, 0.855908360329382  
"8859", "COX14", 427.686433347969, -0.17808749023114, 0.259166316600784, -0  
.687155231308331, 0.491984912525329, 0.85607262970741  
"8860", "TRAK2", 132.804803131034, -0.189549958618873, 0.276045964170303, -  
0.686660858051641, 0.492296468221851, 0.856409926550971  
"8861", "AC135507.1", 10.2893284223022, 0.342243583220466, 0.4985375833498  
94, 0.686495050023671, 0.492400984691616, 0.856409926550971  
"8862", "ADAMTS13", 7.53819773169753, 0.366771902022586, 0.534092722499532  
, 0.686719527474759, 0.492259489020568, 0.856409926550971



"8863", "REX1BD", 759.297563719615, -0.146386088976514, 0.213209884038581, -0.686582095556249, 0.49234611438243, 0.856409926550971  
"8864", "RRAS", 1235.11613849076, 0.185794113966893, 0.270836527849988, 0.686000944709354, 0.492712512674339, 0.856855074782823  
"8865", "B4GALT7", 123.825970657882, -0.210630866368746, 0.307243673052199, -0.685549890340494, 0.492996989719442, 0.857253084774416  
"8866", "PRPF8", 282.465674436824, 0.148829864467163, 0.217163354079282, 0.685336000165243, 0.493131919609991, 0.857390992644711  
"8867", "STPG1", 13.7399983932607, -0.314348219732294, 0.459176406821224, -0.68459140117511, 0.493601794658282, 0.857596303679816  
"8868", "FOX2-AS1", 2.75427569918956, -0.588706135415295, 0.859770348293746, -0.684724864707895, 0.493517555612084, 0.857596303679816  
"8869", "DCAF6", 230.766670472055, 0.127901943211636, 0.186942152307642, 0.684179258839141, 0.49386197779862, 0.857596303679816  
"8870", "PTPN14", 106.842561490225, -0.216875555610806, 0.316783746461688, -0.68461705511471, 0.493585601896753, 0.857596303679816  
"8871", "OST4", 2221.45679725824, -0.162211125152264, 0.236897874506054, -0.684730183799599, 0.493514198485877, 0.857596303679816  
"8872", "ZNF316", 48.7247140284438, 0.208264900133482, 0.304341345531179, 0.684313528843704, 0.493777205839676, 0.857596303679816  
"8873", "ANKRD26", 154.018036273967, 0.166708807731724, 0.243647839606366, 0.684220340311889, 0.493836040002889, 0.857596303679816  
"8874", "IMPACT", 117.674592466437, 0.141410994238125, 0.206457280161853, 0.68494070118169, 0.49338134099193, 0.857596303679816  
"8875", "SIRT2", 243.078435539268, -0.144263780898446, 0.210689712873964, -0.684721522140693, 0.49351966526799, 0.857596303679816  
"8876", "HAR1A", 4.6214007734146, 0.523822505199999, 0.765428510087679, 0.684351965332458, 0.493752940227062, 0.857596303679816  
"8877", "NHS", 15.8009446054169, -0.309149477194388, 0.451841745683865, -0.684198572060862, 0.49384978383144, 0.857596303679816  
"8878", "ACSS2", 50.7539828422476, -0.177371839944913, 0.259310294383404, -0.684013877531058, 0.493966402719767, 0.857681020266412  
"8879", "ATG9A", 86.637149170593, 0.158199580571214, 0.231355822496048, 0.683793383129211, 0.494105645476978, 0.857694864252425  
"8880", "COL6A3", 8969.50789800004, 0.140288416420494, 0.205275206662617, 0.683416271752033, 0.494343840899109, 0.857694864252425  
"8881", "NKIRAS1", 69.601472076812, 0.190732466076, 0.279014758495685, 0.683592750090852, 0.49423236397832, 0.857694864252425  
"8882", "ZFR", 364.605197716613, 0.102594282174196, 0.150051619773583, 0.683726589083164, 0.49414783022496, 0.857694864252425  
"8883", "IGIP", 50.8015986157147, 0.229444829710024, 0.335724366169847, 0.683432162900996, 0.494333802309752, 0.857694864252425  
"8884", "RPS20", 8572.95667523714, -0.123541289200714, 0.180778571625148, -0.683384585297432, 0.494363857858112, 0.857694864252425  
"8885", "MFSD12", 76.1371510063815, -0.181695362771683, 0.26570802776051, -0.683815857213956, 0.494091452076176, 0.857694864252425  
"8886", "GOLM1", 268.60661141335, 0.112509271950453, 0.164723279537211, 0.683019863777284, 0.494594290849066, 0.857998086139811  
"8887", "IL18BP", 11.2285788971524, -0.39461003627013, 0.577849455140139, -

0.682894191142622,0.494673704786292,0.858039288767941  
"8888","RNF227",10.8791538830809,-0.310760503741033,0.455126490424702,  
-0.682800298991709,0.494733040730252,0.858045659637357  
"8889","ABCE1",192.7689611269,-0.11535400358744,0.169030927272839,-0.6  
82443180360967,0.49495875963715,0.858049175759052  
"8890","MIR3945HG",3.0601846125314,0.644412638127045,0.94463630962731,  
0.682180677959846,0.495124710890481,0.858049175759052  
"8891","PCDHB7",15.7630814878531,-0.345844640411219,0.506791023253289,  
-0.682420612328742,0.494973025741557,0.858049175759052  
"8892","HSD17B8",36.0647139157106,0.251894892882098,0.369061830511213,  
0.682527620190853,0.494905383984732,0.858049175759052  
"8893","AL162231.2",58.2062922585941,0.164122571797199,0.2405800999342  
73,0.682195126870581,0.495115575668311,0.858049175759052  
"8894","ZDHC24",128.739945519842,0.139474509503504,0.204369613699083,  
0.682462069478043,0.494946819282683,0.858049175759052  
"8895","BCAS3",52.3630386703508,0.182750685267868,0.267859258238532,0.  
682263836873341,0.495072135484652,0.858049175759052  
"8896","DLST",184.342085923204,0.125774663043304,0.184493175559772,0.6  
81730707174888,0.495409246814944,0.858234867634483  
"8897","CD226",4.02510885923816,0.592725556798906,0.869533752163601,0.  
681659056159772,0.495454562898428,0.858234867634483  
"8898","SMG9",84.285869659788,-0.141682870542081,0.207811138112917,-0.  
681786702236794,0.495373833967085,0.858234867634483  
"8899","CSF2RB",3.08165588252097,-0.758075631737915,1.11196128461161,-  
0.681746426093155,0.495399305593619,0.858234867634483  
"8900","NPIPB2",17.0830075333935,-0.277989888818849,0.408003352171781,  
-0.681342168732494,0.495655006655601,0.858292735070331  
"8901","C17orf97",39.6511570777488,-0.373858894595384,0.54864120546069  
6,-0.681426934168121,0.495601384943923,0.858292735070331  
"8902","ZNF446",34.3391834790133,-0.190086564031118,0.27897943296337,-  
0.681364077674054,0.495641146995746,0.858292735070331  
"8903","KALRN",6.42211974662059,-0.494547518093087,0.726017993597993,-  
0.681178045797753,0.495758837879001,0.858369252411038  
"8904","GRK4",49.2217415006168,0.166711506378161,0.24489156885469,0.68  
0756414595396,0.496025633116375,0.858369252411038  
"8905","AC108471.3",5.69853997420678,0.475182578275612,0.6977004214924  
75,0.681069644847186,0.495827423345852,0.858369252411038  
"8906","TSPAN12",23.9601625725641,0.30473288966487,0.447546161871739,0.  
.68089711325064,0.495936594825466,0.858369252411038  
"8907","VCL",431.862292192683,-0.131203317130532,0.19273082844563,-0.6  
80759368849726,0.496023763488766,0.858369252411038  
"8908","DOK5",72.4713947086956,-0.209286795207754,0.307438188777416,-0.  
.680744301936014,0.496033298765976,0.858369252411038  
"8909","ASTE1",49.890061736564,-0.164496386904212,0.241688745868894,-0.  
.680612522162883,0.496116701345678,0.858417213070336  
"8910","AL359504.2",9.40080794173443,0.338754775517617,0.4984887100030  
41,0.679563586335889,0.496780832846359,0.858517154802083  
"8911","AC009315.1",2.54143949518457,-0.628919662777228,0.924704251386  
568,-0.680130605903651,0.496421766773945,0.858517154802083  
"8912","TOMM6",769.904581238979,-0.174055760612283,0.256039644531221,-

0.679800040071758,0.49663108130478,0.858517154802083  
"8913","AL954642.1",5.63782686097526,1.48265334174009,2.18161299458201  
,0.679613361958436,0.496749306809944,0.858517154802083  
"8914","CPNE8",109.996704883696,0.199292750272567,0.292934383314899,0.  
680332393955719,0.496294017557052,0.858517154802083  
"8915","AL049775.3",5.70684633338565,0.484357664403726,0.7120546191019  
02,0.680225436939985,0.496361728376202,0.858517154802083  
"8916","COR07",44.1764692925216,0.180857745676403,0.266070111530676,0.  
679737173919856,0.496670893523215,0.858517154802083  
"8917","MILR1",18.2530323210182,0.372578985509571,0.548270111863833,0.  
6795537043648,0.496787091847848,0.858517154802083  
"8918","AC027601.6",5.16963378728653,-0.440457274444587,0.647973295841  
688,-0.679746028534175,0.496665285921983,0.858517154802083  
"8919","GZF1",32.6923194141238,-0.220995339751073,0.325055463457044,-0.  
.679869636402153,0.496587008946686,0.858517154802083  
"8920","AC0T8",69.3528427053864,0.181381615669626,0.266630786873127,0.  
680272588911251,0.496331877472799,0.858517154802083  
"8921","KLHDC4",52.2676793624334,-0.155642144367967,0.229077457425302,  
-0.679430207220275,0.49686531549715,0.858556085459989  
"8922","DENND4B",48.7682962477758,-0.166910464216735,0.24581538846842,  
-0.679007385406948,0.497133182447124,0.85892266391195  
"8923","PCYT1A",121.439528425495,0.135547439257224,0.199810972623243,0.  
.67837835669219,0.497531828341054,0.85951508840943  
"8924","ARID1B",539.426958750261,0.156346630135364,0.230541851908707,0.  
.678170270781361,0.49766373989489,0.859646632729687  
"8925","VTA1",135.04344966046,0.119935515728057,0.17702475538453,0.677  
507027011758,0.498084313127263,0.859987644137181  
"8926","STK24-  
AS1",3.16315447393656,-0.666317466891051,0.983399659944928,-0.67756528  
0964573,0.498047365812339,0.859987644137181  
"8927","GOLGA80",6.31838617698074,0.425902690909369,0.628430704534362,  
0.677724191126121,0.497946585152206,0.859987644137181  
"8928","ATP6V0D1",349.20682110196,-0.150284258638591,0.221803127170879  
, -0.677556987385532,0.498052625889562,0.859987644137181  
"8929","AK9",33.2569950403658,-0.232113079697892,0.342817546997107,-0.  
677074676401704,0.498358575181228,0.859997428624548  
"8930","NOP2",23.4979622279256,-0.262754211844846,0.388039522638892,-0.  
.677132602519367,0.49832182502991,0.859997428624548  
"8931","DERA",299.308846174963,-0.169922940359494,0.250977247253413,-0.  
.677045199192587,0.498377277003374,0.859997428624548  
"8932","C15orf41",36.7840610430344,0.209465035496253,0.30933454383525,  
0.677147249379989,0.498312532829077,0.859997428624548  
"8933","TMEM202-  
AS1",9.5276695991832,-0.318840986246515,0.470982148649724,-0.676970426  
927245,0.498424717958593,0.859997428624548  
"8934","PKD1",221.992464555415,0.148365346940721,0.219097201328705,0.6  
77166782783925,0.498300140671024,0.859997428624548  
"8935","MDM4",305.252628751142,0.161273258623023,0.238477424510985,0.6  
76262161727574,0.498874211924815,0.860086249981113  
"8936","RAB11FIP5",63.687345639428,-0.1602556773288,0.23691218793158,-

0.676434921849954,0.498764551446895,0.860086249981113  
"8937","IBTK",184.088850888519,0.123215098598097,0.182223607385355,0.6  
76175279186131,0.498929365958117,0.860086249981113  
"8938","TSTD3",86.6144437827352,0.148256366109091,0.219214669054501,0.  
676306776131989,0.498845891448671,0.860086249981113  
"8939","NEIL2",40.4315464672193,-0.189933054119857,0.280925283430965,-  
0.67609811334953,0.498978354432766,0.860086249981113  
"8940","AGAP5",13.8834151248501,0.355221259930734,0.525060853810597,0.  
676533505312265,0.49870198077151,0.860086249981113  
"8941","RHOG",226.675716055273,-0.149987483458118,0.221731995119602,-0  
.67643590803039,0.498763925499992,0.860086249981113  
"8942","ADAT1",31.467857923034,0.20311721854604,0.300140595793532,0.67  
6740239050387,0.498570780939774,0.860086249981113  
"8943","AC011511.5",3.52201334731219,0.656283911689095,0.9700869237575  
19,0.676520727799376,0.498710090391402,0.860086249981113  
"8944","AL390728.5",3.47878307282397,0.683527229652217,1.0112041044436  
4,0.675953772980671,0.499069995297349,0.86014802968567  
"8945","ITCH",136.386609285797,0.138505816399535,0.204964573181666,0.6  
75754908516673,0.499196267840111,0.860269476663534  
"8946","AC067817.2",2.59540969446956,0.645068291463106,0.9547631621543  
39,0.675631734688596,0.499274487772791,0.860308096246096  
"8947","PIGV",75.4045334148876,-0.176236924375686,0.261329578706075,-0  
.674385675162721,0.500066147536357,0.860577644231137  
"8948","ZMYM6",55.3039740236436,0.223143813713767,0.330703453078263,0.  
674755015820649,0.499831424681034,0.860577644231137  
"8949","PRRC2C",1237.75235277852,0.117420343252073,0.174157524137404,0  
.674219180788494,0.500171976928033,0.860577644231137  
"8950","THADA",83.2729860719546,0.144948503434708,0.214966876143723,0.  
674282968776071,0.500131429746123,0.860577644231137  
"8951","RPL9",14286.0841162473,-0.146737591052157,0.217519350786733,-0  
.674595572860211,0.499932746473269,0.860577644231137  
"8952","OCIAD2",5.2168344636447,-0.430705518690811,0.638836135555857,-  
0.674203437656278,0.500181984404127,0.860577644231137  
"8953","LPCAT1",98.5134645805043,0.176766898032662,0.262239119819932,0  
.674067614908257,0.500268327600079,0.860577644231137  
"8954","EGR1",8896.99502560217,0.143099911755171,0.212160389759464,0.6  
74489295185638,0.500000289183363,0.860577644231137  
"8955","PCDHGA1",4.22111320872057,-0.518534181122676,0.768745782201296  
, -0.674519708762314,0.499980959931372,0.860577644231137  
"8956","GL01",453.796856732708,0.13804102072837,0.20477659074093,0.674  
105473818592,0.500244259707921,0.860577644231137  
"8957","PURB",169.827460925313,0.16303860822427,0.241620632793595,0.67  
4771050548263,0.499821235638129,0.860577644231137  
"8958","PSPH",22.2608673860813,0.250135629949166,0.370681983619007,0.6  
74798455287914,0.499803821935663,0.860577644231137  
"8959","ODF2",49.3474853717988,-0.192209880637703,0.285082112409417,-0  
.674226379947904,0.500167400655821,0.860577644231137  
"8960","PCDH9",142.397996656063,-0.249731572381511,0.370238337884083,-  
0.67451570199005,0.499983506400072,0.860577644231137  
"8961","NLE1",48.9957429672291,0.2054231661397,0.30458038534853,0.6744

46471346589,0.500027506410384,0.860577644231137  
"8962","SRSF9",803.731025017531,-0.156518888982618,0.232310306095876,-  
0.673749226252673,0.500470759835222,0.860829810629317  
"8963","KIFAP3",317.884405921608,-0.112237327153776,0.166706594336906,  
-0.673262672062927,0.50078019599209,0.861077011942724  
"8964","IQCA1",9.81508974523477,0.42626828859758,0.633182532644297,0.6  
73215489406187,0.500810208361204,0.861077011942724  
"8965","CEP162",117.033650612855,0.175034998458159,0.26001529575579,0.  
673171929941207,0.500837916904214,0.861077011942724  
"8966","MICU1",275.642651498912,0.128348942339899,0.19065788896042,0.6  
73189780080611,0.50082656218175,0.861077011942724  
"8967","EXOC3L1",3.6372624556057,-0.557554238824515,0.828407164929917,  
-0.67304371863042,0.5009194779154,0.861121194609779  
"8968","RPP40",21.8102699512281,-0.333773576741447,0.496010984758604,-  
0.67291569541325,0.501000926294603,0.861165173821511  
"8969","LINC01719",13.30801458903,0.360173384612484,0.535412706249799,  
0.672702347942493,0.501136673559586,0.861206446256524  
"8970","PIN1",377.46192078088,-0.164829454242436,0.244998672513207,-0.  
672776927938459,0.501089218096229,0.861206446256524  
"8971","RMDN1",124.542996188327,-0.12130449837131,0.180357053269919,-0.  
.672579730994875,0.501214700246807,0.861244521714918  
"8972","GTPBP2",59.3283071509937,-0.21620292650074,0.321602464537704,-  
0.672267629576554,0.501413333472253,0.861297808722396  
"8973","AL138762.1",15.8144291688994,0.322407874480095,0.4795486454944  
69,0.67231526459147,0.501383014039537,0.861297808722396  
"8974","PGAP2",42.993837620538,0.196486131750918,0.292261600545958,0.6  
72295407210092,0.501395653038769,0.861297808722396  
"8975","ZNF468",27.6687665893331,0.20985471992801,0.312200788203194,0.  
67217869991868,0.501469939323106,0.861299065700911  
"8976","KDM4C",47.8713799107746,0.189978324903889,0.282872230731199,0.  
671604718543112,0.501835373566514,0.861400871370334  
"8977","GPRC5D-  
AS1",2.54906635010598,-0.810274715687296,1.20629644236532,-0.671704472  
657237,0.50177185342794,0.861400871370334  
"8978","TBX5-  
AS1",10.3088782529784,-0.482175216788989,0.71772525163578,-0.671810300  
236831,0.501704470558963,0.861400871370334  
"8979","SNHG19",172.305611476686,-0.193044080927493,0.287441486681201,  
-0.671594358755864,0.501841970582199,0.861400871370334  
"8980","AC124283.1",9.4192033503015,0.350770975904404,0.52215725517950  
2,0.671772674658747,0.501728427086454,0.861400871370334  
"8981","ZNF577",28.1953068182305,0.211886767437149,0.315514753745855,0.  
.67155898391941,0.501864497293349,0.861400871370334  
"8982","KANSL1-  
AS1",37.8036129286205,0.204688214834866,0.304846402123363,0.6714470415  
56469,0.501935785764631,0.861427314357804  
"8983","NHLRC2",129.200271117025,0.160181410842311,0.238626064596978,0.  
.671265358680937,0.502051498626999,0.86143408852796  
"8984","C17orf82",4.53159055744587,0.50430827865876,0.751264899287576,  
0.671278904600754,0.502042870815407,0.86143408852796

"8985", "LRP10", 832.436193060051, -0.0875073829040835, 0.130382173351128, -0.671160639947458, 0.502118199846028, 0.861452648928939  
"8986", "SNX11", 41.9215206634474, -0.21570098567275, 0.321526137222522, -0.67086609983271, 0.502305834056955, 0.861678659246379  
"8987", "RAD51-  
AS1", 53.3079162282165, 0.227624608421106, 0.339354447496284, 0.670757699215357, 0.502374899059634, 0.861701242795622  
"8988", "PIK3CD", 8.42490042566916, -0.416978689801786, 0.622203848619899, -0.670164112174298, 0.502753178652835, 0.86172775792959  
"8989", "TMEM18", 237.12681866549, -0.1360515780606, 0.203105607382842, -0.669856336384406, 0.50294937645751, 0.86172775792959  
"8990", "ABCB6", 103.689101738819, -0.144761571893558, 0.216068154957275, -0.669981061865329, 0.502869862840918, 0.86172775792959  
"8991", "LARS2", 21.9552995310649, 0.226550439762344, 0.338144353709206, 0.669981436263079, 0.502869624168985, 0.86172775792959  
"8992", "PIGG", 70.4922464821722, 0.165775160174776, 0.247235842774357, 0.670514268135764, 0.502530013969538, 0.86172775792959  
"8993", "MRPL1", 167.004168730497, 0.138278962835939, 0.206277109488119, 0.67035534470636, 0.502631294048911, 0.86172775792959  
"8994", "PIWIL4", 16.8292112111732, 0.308563828948803, 0.460587519848197, 0.669935279728163, 0.502899048593614, 0.86172775792959  
"8995", "CRTC3", 131.492952990938, 0.118317668702777, 0.176532348806062, 0.670232223742517, 0.502709765045507, 0.86172775792959  
"8996", "PCGF2", 157.992097825821, -0.144226595431091, 0.215220509683726, -0.670134066883478, 0.502772329839555, 0.86172775792959  
"8997", "PAXBP1-  
AS1", 9.01853455017844, 0.363996844786842, 0.54286306707948, 0.670513186216717, 0.502530703427658, 0.86172775792959  
"8998", "AC096921.2", 16.9987502721278, 0.270213288569279, 0.403464685114182, 0.669732193519757, 0.503028525248002, 0.861767583540559  
"8999", "HIST2H2BF", 4.41653824935045, 0.490842565108831, 0.733155606305197, 0.66949302561086, 0.503181028203403, 0.861770458667653  
"9000", "WDR75", 74.428367856336, 0.148555939953725, 0.221885459772822, 0.669516335616694, 0.503166163743952, 0.861770458667653  
"9001", "MMP11", 47.6859690189485, 0.280232818324157, 0.418591223418153, 0.669466540735893, 0.503197917513302, 0.861770458667653  
"9002", "PDE4B", 51.4329279324086, 0.274523348804041, 0.410706636533356, 0.668417124011449, 0.503867367742912, 0.862184009445849  
"9003", "AC010969.2", 26.2833322608443, 0.23651636207042, 0.353728671198365, 0.668637804419835, 0.503726550950626, 0.862184009445849  
"9004", "ANKAR", 53.590650133181, 0.202815939121556, 0.303409737400688, 0.66845560349869, 0.503842812377973, 0.862184009445849  
"9005", "MYNN", 64.7202262695012, -0.16204986927901, 0.242315730927145, -0.668755052175019, 0.503651743278217, 0.862184009445849  
"9006", "AC006160.1", 3.4805329727474, -0.597005203520327, 0.892845081879123, -0.668654860330128, 0.503715668390963, 0.862184009445849  
"9007", "BCKDHB", 64.7727754118983, -0.143126360703568, 0.214137088686078, -0.668386600293186, 0.503886846649215, 0.862184009445849  
"9008", "SUV39H2", 11.1323797266551, -0.344525843062513, 0.51511486954679, -0.668833037892373, 0.503601989241073, 0.862184009445849

"9009", "RTKN2", 5.25122030673304, -0.447553807192996, 0.669429846985579, -0.668559684346787, 0.503776397214578, 0.862184009445849  
"9010", "HSD17B12", 344.163325485908, -0.0882626025108974, 0.132093603409125, -0.668182260404595, 0.504017257692597, 0.862311434775959  
"9011", "HELQ", 76.5877604051612, -0.152872604743539, 0.228833657581237, -0.668051222706468, 0.504100896173374, 0.862351333948746  
"9012", "AC015712.1", 9.37816400367186, -0.389965344931405, 0.583806293030381, -0.667970437432594, 0.504152463285507, 0.862351333948746  
"9013", "JADE1", 187.841289089845, 0.200302777329508, 0.30006075829072, 0.667540728986097, 0.504426802906344, 0.862724860401786  
"9014", "MLLT10", 155.058671094563, 0.124341045004314, 0.186310730975959, 0.66738531029841, 0.504526046551771, 0.862798869269531  
"9015", "ATP13A1", 62.9585664023261, 0.139839700652275, 0.209591163765363, 0.667202271985212, 0.504642940095436, 0.862903041771619  
"9016", "UNG", 60.700616083181, 0.153247479913623, 0.229733237201847, 0.667067080846368, 0.504729286220521, 0.862918869438288  
"9017", "SNX5", 361.008198133278, -0.112319885443148, 0.168392476835831, -0.667012491019124, 0.504764154766464, 0.862918869438288  
"9018", "AC011445.2", 2.77401890957985, 0.58671619194507, 0.879765809085865, 0.666900424960487, 0.504835739490183, 0.862945544936923  
"9019", "ASB3", 86.9780832537708, 0.154558303071552, 0.231815121036179, 0.66673089477813, 0.504944040888186, 0.862996702388077  
"9020", "SSTR2", 2.53494166714232, -0.637651532246056, 0.956513731776995, -0.666641273472821, 0.505001298841424, 0.862996702388077  
"9021", "TRAPPC2B", 90.1326230343846, -0.20175999530321, 0.302674489017954, -0.666590686112438, 0.505033619996292, 0.862996702388077  
"9022", "THAP11", 124.575703435013, -0.175897271060748, 0.263940542970807, -0.666427632075469, 0.50513780550817, 0.863079059178502  
"9023", "FAM111A-DT", 25.8513389984545, -0.213123851666421, 0.319846226979241, -0.666332236210038, 0.505198765195183, 0.863087550203229  
"9024", "ME1", 29.8387446681711, -0.205033649079133, 0.307764431148175, -0.666203200656472, 0.505281227418235, 0.863132770462334  
"9025", "TSNARE1", 7.9069336736997, -0.339962688400387, 0.510520882837678, -0.665913383426627, 0.505466465569916, 0.863353525402798  
"9026", "RBBP7", 473.34934576064, -0.117228218344937, 0.176071316586583, -0.665799635156875, 0.505539178123656, 0.863382055259933  
"9027", "AFDN-DT", 6.11969835852827, 0.45833621472068, 0.688928686323475, 0.665288329285037, 0.505866093788287, 0.863507518450824  
"9028", "STYXL1", 51.4199383494981, 0.213839740430744, 0.321444280269862, 0.665246680548241, 0.505892727805993, 0.863507518450824  
"9029", "ARHGAP27", 19.1491130213801, 0.331276308757041, 0.497834590324562, 0.665434494097861, 0.505772628456663, 0.863507518450824  
"9030", "TOB1-AS1", 5.57422765569007, 0.450323352767803, 0.676817084928829, 0.665354588108776, 0.505823723347407, 0.863507518450824  
"9031", "BAHCC1", 35.6642141344578, -0.202923495601386, 0.304898559456603, -0.665544291068612, 0.505702424580805, 0.863507518450824  
"9032", "AC005520.2", 21.5792428720532, 0.226241249520957, 0.3401327878002

4,0.665155661658319,0.505950936190886,0.863511257903289  
"9033","MAT2A",469.100367734885,0.154407488279865,0.232180165923545,0.  
665033068891467,0.506029342266032,0.863549464300995  
"9034","BRF2",71.4798943311232,0.188769171254446,0.283914615402772,0.6  
64880076661961,0.506127199748291,0.863620852791665  
"9035","SSU72",515.528021088952,-0.155427202593429,0.23389512102662,-0  
.664516651357337,0.506359695156045,0.86369138162497  
"9036","PIK3R3",2.8724985245229,0.698515270414415,1.0512976563273,0.66  
443149208063,0.506414182535098,0.86369138162497  
"9037","JAK1",856.496063342969,-0.107042309747848,0.161148472698608,-0  
.664246504824443,0.506532553377823,0.86369138162497  
"9038","SHROOM1",24.8340782022567,0.24965026911527,0.375852002847021,0  
.66422492689731,0.50654636174885,0.86369138162497  
"9039","ZFAND2A",84.2255578701754,-0.216452375944524,0.32588312830695,  
-0.664202461382558,0.506560738324447,0.86369138162497  
"9040","NLRX1",31.6234446319762,0.192980889481539,0.290436247348073,0.  
664451807388426,0.506401183930996,0.86369138162497  
"9041","ZNF772",6.26943010702018,0.389294353410877,0.585750831437671,0  
.664607427795518,0.506301617149028,0.86369138162497  
"9042","STK35",76.4967879425748,-0.223355797267896,0.336335301643108,-  
0.664086690206856,0.506634828301294,0.863722171893877  
"9043","WDSUB1",51.0927510058661,0.180883247448942,0.27243419061053,0.  
663952079742926,0.506720982003004,0.863773519581589  
"9044","TENT4A",63.6176382196876,-0.162423730947055,0.244731030091554,  
-0.66368261877659,0.506893466170838,0.863972001440012  
"9045","LSM5",404.136219748705,-0.175572437649894,0.264617644209946,-0  
.663494825426668,0.507013692471565,0.863989696506207  
"9046","PORCN",39.2348931843695,-0.196579307768453,0.296280155756358,-  
0.663491306957821,0.507015945157,0.863989696506207  
"9047","STK25",262.698033633211,-0.11806734260498,0.17813732539221,-0.  
662788342336605,0.507466120873387,0.864291392174859  
"9048","MRPS25",196.076753890424,0.171631537210901,0.25895816349213,0.  
662777086832858,0.507473330559497,0.864291392174859  
"9049","CD96",4.22442040390887,0.559132221713112,0.843318147315554,0.6  
63014573435825,0.50732122048721,0.864291392174859  
"9050","BRD8",118.666805888955,0.186140562162093,0.280846246797221,0.6  
62784581545401,0.50746852983325,0.864291392174859  
"9051","RNF169",145.726964219973,0.144595480477237,0.218159309986376,0  
.662797661425806,0.507460151593702,0.864291392174859  
"9052","TMEM50A",1307.70103790201,-0.149159587687928,0.225274737418605  
, -0.662123012092388,0.507892388934623,0.864468915182715  
"9053","SPICE1",46.9679745484303,0.164184935911204,0.247966076240305,0  
.662126603770151,0.507890087291076,0.864468915182715  
"9054","TNFSF13B",200.3484476493,-0.185611040087846,0.280244443977872,  
-0.662318358406069,0.507767213719165,0.864468915182715  
"9055","GZMM",8.09320807549087,0.358347767400979,0.540968047612107,0.6  
62419470027418,0.507702429151199,0.864468915182715  
"9056","SETD4",54.1912392045416,0.16651843769766,0.251468402348358,0.6  
62184338639025,0.507853089988098,0.864468915182715  
"9057","CBX6",324.340781863325,-0.126432456704962,0.190959847113952,-0



.662089222502967,0.507914042478744,0.864468915182715  
"9058","POLR2B",163.590954508125,0.109445758742942,0.16544858611456,0.  
661509181270123,0.508285828597666,0.864664489262536  
"9059","ABHD11",55.6992426358587,0.18018488674618,0.272401283788407,0.  
66146856668511,0.508311866481022,0.864664489262536  
"9060","IGHG1",86.6223528323129,0.671820748553952,1.0157787785921,0.66  
1384902611487,0.508365505428892,0.864664489262536  
"9061","PPP4C",313.707075939321,-0.177688111428944,0.268483186903507,-  
0.661822118093397,0.508085229323608,0.864664489262536  
"9062","ZNF805",59.4809408617812,-0.183018798493757,0.276716539305536,  
-0.661394504835421,0.508359349071878,0.864664489262536  
"9063","GMEB2",28.7627039418983,0.234074631281047,0.353754960801616,0.  
661685791629972,0.508172612430073,0.864664489262536  
"9064","KLF9",1634.77191132219,-0.195989000874795,0.296479552870543,-0.  
.661054022030226,0.508577669646188,0.864834503871592  
"9065","POLD1",18.1582754098731,0.267338615270808,0.404389747657307,0.  
661091476278867,0.508553651246041,0.864834503871592  
"9066","ZFC3H1",199.370535009475,0.14771773301985,0.223586965225269,0.  
660672382538138,0.508822438664362,0.865137552395561  
"9067","CHFR",42.3551806062866,0.208906104741077,0.316236359745752,0.6  
60601155759046,0.508868127639997,0.865137552395561  
"9068","HOXA13",12.4171286915711,0.345708289527307,0.523613911129815,0.  
.660235112511361,0.509102962860243,0.865250515158837  
"9069","IFIT3",392.853159026691,0.210814406856059,0.319223045917536,0.  
660398456665682,0.508998162325969,0.865250515158837  
"9070","SH3BGR1",1044.06334141655,-0.138655663595183,0.209984743286218  
, -0.660313037153323,0.509052965512882,0.865250515158837  
"9071","L3HYPDH",82.0202671343832,-0.18186735864869,0.275555883860462,  
-0.660001724879826,0.509252722440298,0.865409625886583  
"9072","AKNAD1",18.6915961498091,0.256824149467492,0.389390599793067,0.  
.659554056014644,0.509540046018021,0.865802448122551  
"9073","THOC7",530.135848139119,-0.167447620815191,0.253987146559081,-  
0.659275963700155,0.509718574418161,0.865967528562757  
"9074","TCEAL1",149.273240946818,-0.133817533216279,0.202991364451731,  
-0.659227714330179,0.509749552655106,0.865967528562757  
"9075","SARNP",293.157756863975,-0.14818636552633,0.22484918397643,-0.  
659047824438022,0.509865058634765,0.866068306209906  
"9076","ZNF492",4.61055191963,-0.538111556495629,0.817012576980214,-0.  
658633136939654,0.510131378603107,0.866425209471891  
"9077","SNX4",153.73037853332,0.123587624142606,0.187742722173535,0.65  
8281837569026,0.510357046465055,0.86662602828825  
"9078","KLF3",444.453812050012,-0.131520882639739,0.199823113018102,-0.  
.658186536348399,0.510418275110543,0.86662602828825  
"9079","RITA1",39.6800406925558,-0.204516380374682,0.310721464599826,-  
0.658198430668687,0.510410633098124,0.86662602828825  
"9080","BX284668.5",112.674597720173,0.205125981545357,0.3121405729953  
53,0.657158983136776,0.51107869618648,0.866845490915078  
"9081","ABCB10",42.1714140677243,-0.167888147173757,0.255482275856836,  
-0.657142052655879,0.511089581351409,0.866845490915078  
"9082","CCDC115",251.17750017498,-0.17692698721866,0.269338347912036,-

0.656894900374315,0.511248497497158,0.866845490915078  
"9083","ATIC",105.497663019562,-0.157764890767675,0.239814565506178,-0.65786200448117,0.510626807507458,0.866845490915078  
"9084","ACKR3",2862.4362280836,0.237159410791069,0.36066126024271,0.657568297275593,0.51081557147907,0.866845490915078  
"9085","RNF13",555.288185915625,-0.0898887914243699,0.136824546399238,-0.656963927818075,0.511204111027708,0.866845490915078  
"9086","SSBP1",693.716906974284,-0.178943623331462,0.272302799539592,-0.65714940732897,0.511084852774474,0.866845490915078  
"9087","AL512598.1",4.02622039760884,0.602805964374574,0.918143589207067,0.656548683082538,0.511471154721319,0.866845490915078  
"9088","LIPA",206.651618323163,-0.111387682893249,0.169449267231498,-0.65735122206857,0.510955107927763,0.866845490915078  
"9089","PCF11",369.917430342162,0.0960950023352249,0.146349788167221,0.656611830728622,0.511430539804702,0.866845490915078  
"9090","ALG9",55.8333212178134,0.152883516099669,0.232739476203672,0.656886913184761,0.511253633600914,0.866845490915078  
"9091","TAGLN",3020.60813355664,0.272559987040916,0.415119110786783,0.656582604747654,0.51144933698298,0.866845490915078  
"9092","LETMD1",270.782194214213,-0.155962639338051,0.237438501749287,-0.656854883218278,0.511274230507033,0.866845490915078  
"9093","HERC2",211.649601645884,0.180609779868832,0.274897619418374,0.657007435171552,0.511176135684466,0.866845490915078  
"9094","SBN02",68.5929605015477,-0.245579448348338,0.373536260596789,-0.657444736304801,0.510894994317301,0.866845490915078  
"9095","ICAM3",55.4491956398612,-0.189452592053247,0.288494793891064,-0.656693278578832,0.511378157161537,0.866845490915078  
"9096","ZBTB45",35.3167998401287,-0.257094368408545,0.391614626434656,-0.656498381455227,0.511503508619108,0.866845490915078  
"9097","MRPL33",539.948517654992,-0.153275184008586,0.233515121608066,-0.656382263183127,0.511578199720273,0.866876766921844  
"9098","INTS6L",17.149672440291,0.321896574865331,0.490694249765185,0.65600233754394,0.511822620200954,0.867195613365322  
"9099","BPI",2.4245310005974,-0.933442585414389,1.42395486748443,-0.655528210008099,0.51212772976648,0.867617205665489  
"9100","BRD9",174.770742282832,-0.164218692912974,0.250697615652542,-0.655046887803574,0.512437566243771,0.868046712488761  
"9101","GADD45A",352.181687981794,0.264241205047486,0.403492745054622,0.654884649813753,0.512542024016157,0.868051934630449  
"9102","BCAS2",263.345533582556,-0.15272365019161,0.233360994004597,-0.654452346858798,0.512820418704381,0.868051934630449  
"9103","MICB",6.71762143175507,-0.40462676705344,0.618463553473525,-0.654245128562392,0.512953891185235,0.868051934630449  
"9104","HOXA5",31.108320790557,0.296049642496949,0.452265267622462,0.654592920772511,0.512729883195735,0.868051934630449  
"9105","AL162390.1",36.6546891784455,-0.294854707048312,0.450625430213965,-0.654323274450601,0.51290355409527,0.868051934630449  
"9106","ASPN",1900.11421748249,0.1968752415705,0.300955309248568,0.654167697064599,0.513003770644398,0.868051934630449  
"9107","TMT2",15.2243636051385,0.340142447383353,0.51980887596131,0.6

54360598891872,0.512879512743544,0.868051934630449  
"9108","PSMC3IP",19.9833507391929,0.239364514140387,0.365767664468965,  
0.654416826287545,0.512843296763493,0.868051934630449  
"9109","ELP2",184.336959076592,0.110456877615958,0.168792670980315,0.6  
54393801427787,0.512858126879539,0.868051934630449  
"9110","LZTR1",92.6526583404737,0.152316065621901,0.232695139661464,0.  
654573472585195,0.512742408149246,0.868051934630449  
"9111","SSBP2",342.810681668195,-0.148001335079468,0.22629942597023,-0  
.654006674762568,0.513107505325965,0.868132169311794  
"9112","MAP3K8",219.673314938103,-0.209166305529274,0.319948018019075,  
-0.653750902488176,0.513272302819154,0.86816298135968  
"9113","AC140912.1",4.71071460149178,0.467186197625071,0.7145473343823  
65,0.653821202802322,0.513227004641043,0.86816298135968  
"9114","DDTL",7.29777868860124,-0.480570234664846,0.735135899555576,-0  
.653716183572824,0.513294674804549,0.86816298135968  
"9115","CSDE1",1086.99808298898,-0.101774807457422,0.155794301589894,-  
0.653263992449027,0.513586101623869,0.868281610315827  
"9116","RAB33B",97.1240004263801,-0.137056849814817,0.209801897655531,  
-0.653267922484892,0.513583568434843,0.868281610315827  
"9117","LINC00535",5.12388002253462,0.564494359892315,0.86410490970406  
3,0.653270631323738,0.513581822398371,0.868281610315827  
"9118","AC110285.2",4.65971233428089,0.495465623589147,0.7584534880202  
71,0.653257755966579,0.513590121495927,0.868281610315827  
"9119","XRCC4",64.0831769319171,-0.166332862376255,0.254662308868378,-  
0.653150688515213,0.513659136904447,0.868303059039593  
"9120","SPESP1",21.2084946904615,0.252320797390523,0.386435804276372,0.  
.652943631512124,0.513792619017244,0.868433467341099  
"9121","FAM114A2",94.0565024368135,0.123834615502522,0.189817280117696  
,0.652388525563839,0.514150564656167,0.86875659141336  
"9122","PROSER1",40.6618796834489,0.175371773099826,0.268834681646862,  
0.652340583534504,0.514181484910529,0.86875659141336  
"9123","AC005899.7",6.28001079313091,0.415966012781027,0.6374391459414  
16,0.65255799777828,0.514041271152802,0.86875659141336  
"9124","UQCR11",1136.77143926466,-0.144669345195451,0.221784273969668,  
-0.652297580013434,0.514209220892345,0.86875659141336  
"9125","TPH1",4.67746609424383,0.530350639353247,0.813197948345066,0.6  
52179017953206,0.514285693896078,0.868790572209101  
"9126","PRELID2",55.2591071492546,-0.189047439677468,0.289939471806092  
, -0.652023812073095,0.514385811247621,0.868864483934044  
"9127","GPR161",62.2616799479084,0.179733514571764,0.275744940862747,0.  
.651810742236708,0.514523270917001,0.868876918291407  
"9128","ASXL2",129.33155371354,0.140740878287428,0.215971892408619,0.6  
51662939643768,0.514618635355209,0.868876918291407  
"9129","GTPBP10",56.9302466918193,0.151648130012677,0.232616609002622,  
0.651923053400577,0.514450812221031,0.868876918291407  
"9130","MCM3AP",91.3408709694937,0.186700501980572,0.286495905182372,0.  
.651669006793399,0.514614720558942,0.868876918291407  
"9131","CCDC96",10.2813396997936,-0.31257662810529,0.479730016096644,-  
0.651567793586467,0.514680029870911,0.868885408001324  
"9132","NEMP1",32.3401511414478,0.233942424397741,0.359289797223835,0.

651124596928081,0.514966059757884,0.869177905525871  
"9133","SYNJ1",47.1976956338888,0.17251468137953,0.264944355989833,0.6  
5113552140039,0.514959008338632,0.869177905525871  
"9134","SOX2-  
OT",3.40925431435821,0.596015733267511,0.915661994691163,0.65091238549  
0605,0.515103045826615,0.869218768628054  
"9135","MIR100HG",261.170018495955,-0.128597721694915,0.19756112657661  
7,-0.650926242035993,0.515094100614919,0.869218768628054  
"9136","EIF1B",939.723581399186,-0.136973568352015,0.210616468129131,-  
0.650345956176776,0.51546877817465,0.869264983651924  
"9137","POLN",9.10848333167148,0.418481486825348,0.643313621377633,0.6  
50509289589089,0.515363303150562,0.869264983651924  
"9138","PACS1",188.059013718432,-0.105025728449256,0.161477074192948,-  
0.650406436790904,0.515429720595929,0.869264983651924  
"9139","KLRC1",2.57160184263538,0.72769737848115,1.11882977808082,0.65  
0409376598288,0.515427822146451,0.869264983651924  
"9140","PMM2",91.5837640668175,-0.175504113395559,0.269818417383792,-0  
.650452682575484,0.515399856717916,0.869264983651924  
"9141","SNHG29",2892.94573285832,-0.182081383873515,0.279858440888213,  
-0.650619589302456,0.515292081779431,0.869264983651924  
"9142","TPRG1L",192.411246028999,-0.112589515832247,0.173196717993342,  
-0.650067259568827,0.515648776598141,0.869315222650797  
"9143","IN080B",56.8692904861373,-0.148160145244659,0.227925401330854,  
-0.650037882480642,0.515667751924677,0.869315222650797  
"9144","HEXIM2",51.0953474893766,0.231242418132988,0.355723061758037,0  
.650063049019518,0.515651496265046,0.869315222650797  
"9145","LYPLA2",70.1086335780272,-0.164792006669178,0.253670126979841,  
-0.649631111992445,0.515930531436322,0.869546550180082  
"9146","SMIM20",337.642785305599,-0.171863816267237,0.264516816445316,  
-0.649727373014738,0.515868339175245,0.869546550180082  
"9147","YY2",9.77794957255531,0.345832456025896,0.532407443660665,0.64  
9563525348297,0.515974200097127,0.869546550180082  
"9148","RPS3A",14515.8379622142,-0.171242098282727,0.263721415218829,-  
0.649329513648467,0.516125413086495,0.869626992877086  
"9149","AC021097.1",4.47701170455561,0.508210613682957,0.7827924981495  
58,0.649227751778811,0.516191176440177,0.869626992877086  
"9150","EFTUD2",69.1842047639931,-0.158800568277603,0.244567229386723,  
-0.649312537398455,0.516136383643621,0.869626992877086  
"9151","SMIM19",683.363965677143,-0.194102900335369,0.29908440932705,-  
0.648990366205003,0.516344603162439,0.869741145611322  
"9152","SOX12",25.776672585458,0.225257624812977,0.347111806231012,0.6  
48948323765924,0.516371778438847,0.869741145611322  
"9153","ECE1",280.258461549527,-0.170299124867991,0.263199459176194,-0  
.647034478722039,0.517609629005124,0.87020277599098  
"9154","GLRX2",130.314856501075,-0.146640592650422,0.226427705685793,-  
0.647626544668126,0.517226524325309,0.87020277599098  
"9155","AL353593.1",6.70073576009332,-0.368875423369808,0.570310137242  
821,-0.646797942525002,0.517762724152051,0.87020277599098  
"9156","CAMKMT",24.2940108655905,-0.207730771043532,0.32054658681501,-  
0.648051732846606,0.516951490879346,0.87020277599098

"9157", "CEP68", 154.536513026113, 0.136407981511563, 0.210454170021522, 0.648160031695324, 0.516881449755489, 0.87020277599098  
"9158", "SFXN5", 37.8219018644863, 0.180132178846721, 0.278516317585934, 0.646756284902921, 0.517789688962114, 0.87020277599098  
"9159", "IN080D", 173.355892526655, 0.170326165547108, 0.263055217445322, 0.647492063458166, 0.517313529413958, 0.87020277599098  
"9160", "BAP1", 86.1928903406407, -0.134842713784364, 0.208478112277496, -0.646795542761251, 0.517764277489688, 0.87020277599098  
"9161", "TMED7", 323.813233848087, -0.106300991668468, 0.164143633780401, -0.647609591796187, 0.517237491879791, 0.87020277599098  
"9162", "CD14", 124.499910841813, -0.327997257856818, 0.50716300339441, -0.646729465007409, 0.517807049756298, 0.87020277599098  
"9163", "PCDHGB6", 28.0760280687331, -0.218034947528173, 0.336666772873032, -0.647628352710653, 0.517225354630609, 0.87020277599098  
"9164", "SAP30L-  
AS1", 5.54318811384113, -0.434425675895428, 0.671516028783554, -0.64693269747021, 0.517675502798243, 0.87020277599098  
"9165", "AL023806.1", 5.82447961891284, -0.416479984250549, 0.643701545457008, -0.647007898598194, 0.517626831495294, 0.87020277599098  
"9166", "GAS1", 2553.21629505685, -0.156306427285553, 0.241734118883277, -0.646604740810404, 0.517887788967969, 0.87020277599098  
"9167", "TMEM38B", 54.5071087868652, -0.239217466843196, 0.369201575609094, -0.647931868786162, 0.517029017411726, 0.87020277599098  
"9168", "ZNF25", 87.4586833854901, 0.154385732093841, 0.238404841603124, 0.647578006619722, 0.517257926033334, 0.87020277599098  
"9169", "POLE", 34.2103238959134, 0.204226006504729, 0.315821029886712, 0.64665106873341, 0.51785779819725, 0.87020277599098  
"9170", "ACOT2", 90.2957851187486, -0.268872477553284, 0.414704383831799, -0.648347324108195, 0.51676033199109, 0.87020277599098  
"9171", "MORF4L1", 2161.43608761079, -0.0930652554180957, 0.143540744715765, -0.648354274616457, 0.516755837537702, 0.87020277599098  
"9172", "ZNF790", 30.3106909303599, 0.196906241144075, 0.304507945891102, 0.646637448385313, 0.517866615350939, 0.87020277599098  
"9173", "ZNF234", 44.9099317621551, 0.213130169523188, 0.329238991206644, 0.647341825286478, 0.517410737718256, 0.87020277599098  
"9174", "NR0B1", 25.0376202456422, -0.471858236522221, 0.729219426757396, -0.647073047162804, 0.517584668277204, 0.87020277599098  
"9175", "MTFR1L", 154.603179056698, -0.142349185902818, 0.220418261220205, -0.645813940799609, 0.518399858530975, 0.870356717605285  
"9176", "GPAT4", 115.053251871154, -0.13501098867579, 0.208997742500935, -0.645992569394313, 0.518284167640226, 0.870356717605285  
"9177", "NSMAF", 90.0267658296633, 0.123648694719039, 0.191430599319851, 0.645919174668836, 0.518331700973875, 0.870356717605285  
"9178", "ADHFE1", 10.6637918468241, 0.301448850814362, 0.466727427269437, 0.645877729059061, 0.518358543789269, 0.870356717605285  
"9179", "FLI1", 22.4209088156057, -0.27941812969243, 0.432660090278106, -0.645814430244363, 0.51839954151814, 0.870356717605285  
"9180", "CACNA2D4", 16.7723954092785, 0.285209396675524, 0.441253620181062, 0.646361601653245, 0.518045201876437, 0.870356717605285  
"9181", "PITPNC1", 63.3755668369861, -0.227297550196639, 0.351902752608381

, -0.645910122929871, 0.518337563394949, 0.870356717605285  
"9182", "ZNF585A", 107.215556696445, -0.13769322785076, 0.213224743609144, -0.645765709551805, 0.518431098349123, 0.870356717605285  
"9183", "GALNT4", 65.7643511132425, 0.156617741474331, 0.242605936866442, 0.64556433983951, 0.51856153785561, 0.870480900146382  
"9184", "GALM", 103.327179360886, 0.129237027612347, 0.200331475399908, 0.645115937744482, 0.518852056297781, 0.870541540031446  
"9185", "HVCN1", 31.4920975650033, -0.213286844526042, 0.330468487459284, -0.64540751272788, 0.518663136135523, 0.870541540031446  
"9186", "LIPC", 29.5274366479216, -0.309020673375087, 0.478963548895447, -0.645186202765803, 0.518806526235944, 0.870541540031446  
"9187", "MINDY2", 350.984889470576, 0.124201321690937, 0.192498461826347, 0.645206826654957, 0.518793162838338, 0.870541540031446  
"9188", "GADD45B", 4665.35784815234, -0.193151881689033, 0.299426500943701, -0.645072767708526, 0.518880030477387, 0.870541540031446  
"9189", "SLC4A2", 96.6321358398704, -0.135568002258337, 0.210314359444509, -0.644596986227688, 0.519188388434796, 0.870693326933894  
"9190", "ZFP37", 34.3993915326508, 0.195471854167035, 0.303304308039317, 0.644474374368914, 0.519267869535912, 0.870693326933894  
"9191", "NRDE2", 101.223297815517, 0.151518468250597, 0.235086466284342, 0.644522292777722, 0.519236806475523, 0.870693326933894  
"9192", "AC092376.2", 29.2202720013282, 0.236496040921947, 0.366817356397108, 0.644724238909573, 0.519105905639875, 0.870693326933894  
"9193", "CCDC22", 66.0564630770197, -0.1797895388125, 0.278947683026028, -0.644527808448312, 0.51923323100917, 0.870693326933894  
"9194", "EDA2R", 21.9463924510476, 0.297148846551352, 0.46111746445554, 0.644410306389518, 0.519309403037965, 0.870693326933894  
"9195", "NIBAN1", 691.509186377297, 0.143911238436225, 0.223386865184268, 0.644224262324087, 0.519430019987958, 0.870706150295168  
"9196", "BUB3", 272.801648663868, -0.0988416168383184, 0.153411569383798, -0.644290500614337, 0.519387074415431, 0.870706150295168  
"9197", "IGKC", 811.421682197829, 0.468735343024092, 0.728085727939091, 0.643791417737149, 0.519710699736846, 0.870987218573982  
"9198", "CLTA", 1427.33648812171, -0.158590969215398, 0.246318897104766, -0.643844102419575, 0.51967653196861, 0.870987218573982  
"9199", "ZBTB48", 35.5422343572943, -0.192106346437761, 0.298955914238825, -0.642590888114341, 0.520489597092772, 0.87119207110078  
"9200", "IPP", 73.948843639418, 0.156924592608829, 0.244083444716383, 0.642913708429389, 0.520280093842302, 0.87119207110078  
"9201", "AC046143.1", 7.40902376267528, -0.45468091450437, 0.70679056796131, -0.643303596730028, 0.520027122916686, 0.87119207110078  
"9202", "ZNF282", 49.6362555142036, 0.170258594280828, 0.264847944413423, 0.642854127706792, 0.520318757143343, 0.87119207110078  
"9203", "MSR1", 33.5306191988305, -0.284652033591191, 0.442507641605918, -0.64327032310256, 0.520048709343009, 0.87119207110078  
"9204", "AP001160.4", 6.50071379030469, -0.414031461337042, 0.644314332801712, -0.642592350129296, 0.520488648179389, 0.87119207110078  
"9205", "AC023509.3", 7.86183043559273, -0.432284167289217, 0.67206718605578, -0.643215702623722, 0.520084145643885, 0.87119207110078  
"9206", "DHRS12", 141.378729157223, -0.170030312434267, 0.264614845827141,

-0.64255772159261,0.52051112389479,0.87119207110078  
"9207","PABPN1",375.268637111645,-0.102218379705119,0.158951530958138,  
-0.643078925311135,0.520172888555935,0.87119207110078  
"9208","INTS14",56.7032516795667,0.154532782153563,0.240204730870587,0  
.643337796027087,0.520004936439263,0.87119207110078  
"9209","FBX017",358.001440471959,0.120106629996023,0.186840113635269,0  
.642831069084465,0.520333720811113,0.87119207110078  
"9210","SAE1",126.570278006984,-0.147920925213612,0.230122299247444,-0  
.642792661542794,0.520358645502602,0.87119207110078  
"9211","TECTA",2.94742606437648,0.580756369675347,0.903943351839351,0.  
642469872137031,0.520568144989102,0.871192916622192  
"9212","RUNDC1",52.4965132009827,-0.209381407697925,0.3259561083635,-0  
.642360742215106,0.520638983234942,0.871216883040233  
"9213","PTPN21",117.131857230086,0.126889088463304,0.197623618586482,0  
.642074511998552,0.52082480414209,0.871433230853177  
"9214","VPS9D1",24.7657821386394,-0.218348150369004,0.340161591874807,  
-0.641895368508755,0.520941121630155,0.871533252651274  
"9215","EIF2B4",93.2937543310065,-0.137953942022416,0.21504550160772,-  
0.641510475648396,0.521191076988275,0.871667619808427  
"9216","PPP1R21",75.5881719458025,0.13933579890166,0.217148265252253,0  
.641662040172408,0.521092641280811,0.871667619808427  
"9217","U47924.2",5.35032208116986,-0.452152559326796,0.70473691701759  
4,-0.64159056863415,0.521139058281863,0.871667619808427  
"9218","CCNYL1",43.2972428817742,-0.243774761570074,0.380240729550112,  
-0.641106390308319,0.521453562656608,0.871917417111575  
"9219","RIOK2",91.0302510289299,-0.179857916824572,0.28052592398819,-0  
.641145439492943,0.521428194126755,0.871917417111575  
"9220","KBTBD3",56.6690482960635,-0.190620762995125,0.29743935030154,-  
0.64087271170367,0.521605386592142,0.872076684850095  
"9221","H0XD3",5.3697991550572,-0.53229129075798,0.831045618463545,-0.  
640507908268732,0.521842449438748,0.872283816753232  
"9222","DHRS7B",170.012195878019,-0.171413524891382,0.26760031944034,-  
0.640557998024357,0.521809895970191,0.872283816753232  
"9223","ATP5MGL",2.47085520761215,0.653852235700119,1.02116016632343,0  
.640303311138977,0.521975428515569,0.872316915716338  
"9224","BCOR",24.960642696393,-0.252780382274667,0.394770257595661,-0.  
640322763457967,0.521962784619864,0.872316915716338  
"9225","CHTF8",7.23349598900074,0.357834529806095,0.559024175184694,0.  
64010564424673,0.522103919791612,0.872437064887555  
"9226","C1S",8829.45978973422,0.129654281666725,0.202584324640198,0.64  
000154946341,0.522171592042054,0.87245557027187  
"9227","SARS",466.74179324733,-0.121817911408711,0.190446450728759,-0.  
639643904848661,0.522404131955316,0.872503673424293  
"9228","CASP10",18.1997092960008,0.24699132547241,0.386220311485705,0.  
639508897194683,0.522491927533192,0.872503673424293  
"9229","FAM76B",92.431613744081,-0.159316978874208,0.249145121080051,-  
0.639454540323986,0.522527277987159,0.872503673424293  
"9230","MYO19",50.422725392775,0.190135372180961,0.297223549117836,0.6  
39704938405068,0.522364444276494,0.872503673424293  
"9231","PNP0",44.9107475318475,0.158173287005924,0.247364138127061,0.6

39434997342569,0.522539987872402,0.872503673424293  
"9232","ZNF674",14.3420994919167,-0.249192241773406,0.389636522343805,  
-0.639550523329857,0.522464857218152,0.872503673424293  
"9233","OAZ2",263.693330822757,0.113750966079915,0.177930707121514,0.6  
39299241373951,0.522628281895418,0.872507903699167  
"9234","ZNF430",133.602492045006,0.121721664995975,0.190411141939016,0  
.639257050592971,0.522655723824723,0.872507903699167  
"9235","PARS2",10.9175580117179,-0.321463439867907,0.503036226996778,-  
0.639046300476419,0.52279281200412,0.872547769277123  
"9236","ABHD8",65.7981762222846,-0.201785740875805,0.315729682936452,-  
0.639109186691258,0.522751904012184,0.872547769277123  
"9237","DHX9",237.721006470962,-0.0929156392891517,0.145479300680093,-  
0.638686320698447,0.523027013402102,0.87257288594554  
"9238","PLCL1",22.5645112064271,0.25899747662834,0.405578265152923,0.6  
38588156420771,0.523090888032613,0.87257288594554  
"9239","ZNF22",484.020727385774,0.131415620901444,0.205726900679615,0.  
638786762777812,0.522961660771138,0.87257288594554  
"9240","SNHG10",24.5155793258431,-0.23569860649289,0.368984608880414,-  
0.638776254673751,0.522968497671833,0.87257288594554  
"9241","RHOT2",113.839142167213,-0.13664357055104,0.21396688158113,-0.  
638620189915833,0.523070043679485,0.87257288594554  
"9242","GALE",9.62426910772934,-0.341843883928072,0.535403103639695,-0  
.63847945894262,0.523161621195589,0.872586777986437  
"9243","DAGLA",13.1770364469648,0.281205963795282,0.440484575709518,0.  
638401386342131,0.523212428733613,0.872586777986437  
"9244","PBX2",76.8108258176731,0.145906034269995,0.228593127476955,0.6  
38278306440792,0.52329253094937,0.872625958955489  
"9245","DHCR24",29.0288301336702,-0.257154777816483,0.403157660940366,  
-0.637851646466718,0.523570256269494,0.872873188202832  
"9246","ERV3-1",49.6853669030234,0.163148857515743,0.255741191648166,0  
.637945168176872,0.523509373813054,0.872873188202832  
"9247","MAP2K7",127.00613612545,0.169940513802677,0.266452320621017,0.  
637789580539585,0.523610663075679,0.872873188202832  
"9248","ZNF653",8.79965434659318,-0.312180319898482,0.489635014112462,  
-0.637577605564742,0.523748677290849,0.873008851691008  
"9249","STRADB",63.2988300942297,0.153814130053515,0.241301243574189,0  
.637436126624122,0.52384080281326,0.873027841612683  
"9250","DCAF1",45.9706426693769,0.212545735711584,0.333464622308956,0.  
637386161805975,0.523873339923277,0.873027841612683  
"9251","AC106707.1",34.4188878555165,-0.275382132873902,0.432410951944  
361,-0.636852817061248,0.524220718795153,0.873229131211075  
"9252","ISCU",1071.2037393318,-0.158598363026739,0.248991419471118,-0.  
636963166697137,0.524148836026054,0.873229131211075  
"9253","LCAT",46.6024836154935,0.209889869189152,0.329553637732814,0.6  
36891374142015,0.52419560178342,0.873229131211075  
"9254","LYRM9",92.9913766086612,-0.168976218739124,0.265234382222732,-  
0.637082633567563,0.524071019902187,0.873229131211075  
"9255","AL133330.1",109.414871767494,0.697670795612992,1.0956726806785  
,0.636751109994779,0.524286976188798,0.873245136461408  
"9256","RFC4",49.1863324938236,-0.20272341054355,0.318455131694687,-0.



636583902619935,0.524395913293812,0.873332217310297  
"9257","SERINC3",790.1548821909,0.107129934853604,0.168323661709389,0.  
636452022048831,0.524481842849219,0.873380966568079  
"9258","ZNF670",21.2328954774763,0.225984743577967,0.355183410347267,0.  
.636248025652492,0.524614775192091,0.873413625616815  
"9259","AP000926.2",2.95692231783674,-0.559238081105106,0.878863996493  
474,-0.636319252280645,0.524568359065624,0.873413625616815  
"9260","SLC12A4",136.816774049265,0.13355415628134,0.209989522030548,0.  
.6360039062421,0.524773876000431,0.873584157510437  
"9261","SEMA6A-  
AS1",3.09953239973512,-0.545048455871055,0.857661629485533,-0.63550523  
5553095,0.525098953183335,0.873595194184839  
"9262","DDX46",409.742440950007,-0.132138871482767,0.207923968135877,-  
0.635515340859668,0.525092364637424,0.873595194184839  
"9263","HUS1",46.3674485238601,0.154854152614743,0.243634242100954,0.6  
35600937205602,0.525036558482441,0.873595194184839  
"9264","TNP03",143.348236977779,0.1163696182847,0.183038778805285,0.63  
5764831060702,0.524929713259211,0.873595194184839  
"9265","DENR",281.153999016855,0.103092185555941,0.162203186128545,0.6  
35574355945398,0.525053888312248,0.873595194184839  
"9266","SRP14",3976.41730523558,-0.13498821140375,0.21242192151102,-0.  
635472132271182,0.525120536446105,0.873595194184839  
"9267","XKR8",34.2083655224563,0.191341033184035,0.301176180060841,0.6  
35312637092951,0.5252245332947,0.873673916125801  
"9268","AC010654.1",3.96519639683696,0.486044423600885,0.7651938892435  
97,0.63519119850963,0.525303722880311,0.873711360401381  
"9269","AC092490.1",5.60466267324278,0.601833362964476,0.9476301474356  
15,0.635093094698495,0.525367700420628,0.873723497894485  
"9270","APIP",115.327452092621,-0.174276641894856,0.27450372941007,-0.  
63487895872814,0.525507361162292,0.873861485686811  
"9271","FGF2",165.980562651275,-0.127410047063217,0.200746610286479,-0.  
.63468093872865,0.525636527871289,0.873981995160816  
"9272","AL133245.1",4.24267739361749,0.469307868396867,0.7397040043462  
31,0.634453599871549,0.525784839031917,0.874040040297315  
"9273","TCF19",28.1228310373297,-0.194420418667975,0.306397889453499,-  
0.634535763332931,0.525731234822913,0.874040040297315  
"9274","TIMELESS",5.39664812978259,0.394686677235619,0.622459860627913  
,0.634075708652883,0.526031414767706,0.874280310888743  
"9275","AVP",7.40858110175518,-0.380245095656975,0.599700572472065,-0.  
634058250252358,0.526042807881485,0.874280310888743  
"9276","MYD88",81.9842724973677,-0.133169201977598,0.210106908049928,-  
0.633816390015853,0.526200655544088,0.874309871551534  
"9277","GGACT",26.8542995463685,0.305707339301365,0.482231703863316,0.  
633942847084179,0.52611812158522,0.874309871551534  
"9278","MEIS3",105.525854509963,-0.140009740724021,0.220915596895633,-  
0.633770284631217,0.52623074850828,0.874309871551534  
"9279","CATSPERG",4.87228795373164,0.440571570314354,0.695460729498447  
,0.633495971270852,0.526409810895835,0.874513119405032  
"9280","RBBP5",79.3568049575538,0.152806148345759,0.241410992129229,0.  
632970963741207,0.526752604638502,0.874769085505239

"9281", "ZNF860", 3.56517938759848, -0.537743038187858, 0.849841976746847, -0.632756504034211, 0.526892664829781, 0.874769085505239  
"9282", "MAGEF1", 172.502265159388, -0.122381779264234, 0.193416024396038, -0.632738572961491, 0.526904376186581, 0.874769085505239  
"9283", "AC100793.4", 72.3034888666384, -0.246398781400867, 0.38932328521741, -0.632889916315359, 0.526805533176489, 0.874769085505239  
"9284", "MKS1", 25.2751488792077, 0.208731556395113, 0.329743225185055, 0.633012418308129, 0.526725533518923, 0.874769085505239  
"9285", "HDHD5-AS1", 2.46297539815057, 0.632265829670067, 0.998786164323872, 0.633034229201683, 0.52671129061329, 0.874769085505239  
"9286", "PPIL1", 21.7486190872129, -0.264668129972045, 0.418471161985675, -0.632464442032697, 0.527083436401667, 0.874877912364779  
"9287", "CADPS2", 68.6202731898697, -0.142121398074802, 0.224704739848333, -0.632480641800114, 0.527072853974888, 0.874877912364779  
"9288", "OTUD3", 38.4921807770794, -0.184095116009024, 0.291372053577228, -0.631821459020709, 0.527503549764358, 0.874915775728167  
"9289", "AC004522.5", 4.35125756372948, 0.459218021606824, 0.726690292216127, 0.631930860403246, 0.527432056843644, 0.874915775728167  
"9290", "LINC01252", 9.55879092908578, 0.448263320642512, 0.709262093040371, 0.632013644943234, 0.527377961099735, 0.874915775728167  
"9291", "FAIM2", 21.0198009669947, 0.302062748957689, 0.477781315410824, 0.632219677108883, 0.527243341205322, 0.874915775728167  
"9292", "INTS6-AS1", 20.4082691933349, -0.211775826046134, 0.335037456888669, -0.632095969247121, 0.52732416890485, 0.874915775728167  
"9293", "NLRP1", 53.2148972609534, 0.199936866554925, 0.316428596144011, 0.631854607931611, 0.527481886696696, 0.874915775728167  
"9294", "ZNF414", 82.4304465774585, -0.180415078441836, 0.285537210003107, -0.631844369565259, 0.52748857749925, 0.874915775728167  
"9295", "NUP42", 110.029567547955, -0.158266205400742, 0.250563829062394, -0.631640273031313, 0.527621964215953, 0.875018028874548  
"9296", "BTN2A1", 77.9805564744275, -0.140681975375511, 0.222794110924548, -0.631443868923244, 0.527750339806092, 0.87513677798095  
"9297", "Z97200.1", 101.741184201929, 0.179187010500289, 0.283979921779438, 0.630984787154989, 0.52805047145757, 0.875196299379304  
"9298", "SLC26A6", 9.91951892710022, -0.347174348976228, 0.549982980983287, -0.631245622101856, 0.527879935995344, 0.875196299379304  
"9299", "ZFPM2", 153.076921447075, 0.142886392473166, 0.226460602216698, 0.630954749190497, 0.52807011226253, 0.875196299379304  
"9300", "AC092068.2", 14.0005814118083, -0.315339432271238, 0.49973012665786, -0.631019455201138, 0.528027803662193, 0.875196299379304  
"9301", "ARMCX6", 207.38773335963, 0.17747845418003, 0.281242745181201, 0.631050781650145, 0.528007321205598, 0.875196299379304  
"9302", "CNTFR", 53.8338622872074, 0.664552858942314, 1.05363333018578, 0.630724977943836, 0.528220364191775, 0.875351205548936  
"9303", "MTLN", 307.199619886278, -0.213927167120925, 0.339489477309744, -0.630143734692967, 0.528600547773357, 0.875571879425613  
"9304", "PPIP5K2", 172.093176451986, 0.113155763639787, 0.179510275262132, 0.630358142309958, 0.528460290349078, 0.875571879425613

"9305", "PRPF4B", 491.829523180679, 0.117819875977021, 0.186989791395583, 0.630087210096774, 0.528637527201698, 0.875571879425613  
"9306", "PPP2R2A", 264.573518158187, 0.108248631051418, 0.171763838218348, 0.630217816359058, 0.528552084181978, 0.875571879425613  
"9307", "AC062004.1", 105.830960467153, 0.266571466872829, 0.42304048417256, 0.630132284843202, 0.528608038368859, 0.875571879425613  
"9308", "UTP25", 64.5838739394025, 0.17021191963751, 0.27044990205819, 0.62936580247268, 0.529109600957087, 0.875894069600413  
"9309", "AL392172.1", 32.561450459963, -0.204558064957697, 0.32501769571547, -0.629375162196624, 0.529103474780449, 0.875894069600413  
"9310", "HLA-A", 4351.68330207713, 0.164546416299337, 0.261559512775381, 0.62909742625436, 0.52928527534785, 0.875894069600413  
"9311", "FAM126A", 311.178728447245, -0.176608188216909, 0.280675727122081, -0.629225013604731, 0.529201755194719, 0.875894069600413  
"9312", "ZNF273", 53.1431295272151, 0.168399936430029, 0.26758908708921, 0.62932288555507, 0.529137691629924, 0.875894069600413  
"9313", "LIG3", 38.2937172772471, 0.196136453900161, 0.311476436933716, 0.629699170283947, 0.52889142552192, 0.875894069600413  
"9314", "NDUFB7", 1174.00468492291, -0.15348257506212, 0.243973461111505, -0.629095371123063, 0.529286620715397, 0.875894069600413  
"9315", "RALGAPB", 86.5884451788644, 0.17116598105308, 0.272006624472813, 0.629271369345595, 0.529171411851872, 0.875894069600413  
"9316", "BRWD1-AS2", 2.48359021216187, -0.619382983288566, 0.984812448801064, -0.628934965274473, 0.529391633884581, 0.875973812401333  
"9317", "FDFIT1", 145.699225318871, -0.125239236190817, 0.199237069206905, -0.628594049738596, 0.529614856822282, 0.876249116444723  
"9318", "CYB561D2", 113.173452382872, -0.151801327772069, 0.241786033069981, -0.627833319586879, 0.530113136297077, 0.876327923902185  
"9319", "AC099343.2", 2.69826450686447, 0.628102440267911, 1.00043802977329, 0.627827433159696, 0.53011699284468, 0.876327923902185  
"9320", "MAML1", 97.4620858536791, 0.135313559238835, 0.215457903034589, 0.62802782972, 0.529985709188572, 0.876327923902185  
"9321", "MRPS10", 249.514250124505, -0.129579524162428, 0.206260610330932, -0.628232040788232, 0.529851943571023, 0.876327923902185  
"9322", "KDELRL2", 1220.84832898211, -0.145804141598378, 0.232022986380857, -0.628403865809424, 0.529739405276246, 0.876327923902185  
"9323", "MED30", 193.133789793522, -0.152581202875521, 0.242914222109496, -0.62812791095757, 0.529920150223133, 0.876327923902185  
"9324", "VMAC", 40.4776116641354, -0.187868409781828, 0.299235954949047, -0.627826992962184, 0.530117281244754, 0.876327923902185  
"9325", "CASK", 113.366783766711, -0.12211287799776, 0.194358509243391, -0.62828675972628, 0.529816103607283, 0.876327923902185  
"9326", "DOCK2", 8.95259260145421, -0.462981750918007, 0.737774892856517, -0.62753795961453, 0.530306661716771, 0.876528817752334  
"9327", "RBM4", 545.216075160473, -0.138751612281848, 0.221159981100288, -0.627381190717904, 0.530409394225999, 0.876528817752334  
"9328", "HECTD1", 329.764634985659, 0.110353112101121, 0.175880879194327, 0.627430978322516, 0.530376766725722, 0.876528817752334

"9329", "CTSK", 3821.19983569933, -0.144716990110615, 0.231211913990086, -0.625906284901997, 0.531376411944405, 0.876571680850281  
"9330", "CADM3", 240.710771425427, -0.273824600314833, 0.437023132649029, -0.62656774861101, 0.530942614652308, 0.876571680850281  
"9331", "BDH2", 603.070990517506, 0.147822518818823, 0.236229570260582, 0.625757895828884, 0.531473752278908, 0.876571680850281  
"9332", "UQCRQ", 885.788601787861, -0.145124668693414, 0.231714877295527, -0.626307082165997, 0.531113541953944, 0.876571680850281  
"9333", "BOD1", 394.404132561301, -0.149128358285148, 0.237964339289962, -0.626683639784503, 0.530866630077402, 0.876571680850281  
"9334", "MAP7", 2.48510751468616, -0.606235716082111, 0.967044314516369, -0.626895486568572, 0.530727746034021, 0.876571680850281  
"9335", "RNASET2", 232.258077040924, -0.163772393575766, 0.261371393333925, -0.626588822467395, 0.530928797072069, 0.876571680850281  
"9336", "ZC3HAV1", 596.749977874942, 0.273219106201463, 0.436665796804582, 0.625693856035476, 0.53151576392524, 0.876571680850281  
"9337", "HGSNAT", 360.8009698832, 0.122503700708277, 0.195313759616722, 0.627214902568437, 0.530518375857608, 0.876571680850281  
"9338", "URM1", 215.698256671854, -0.172654287308173, 0.275619640673598, -0.626422293005738, 0.531037991089936, 0.876571680850281  
"9339", "CAPS2", 28.803281883013, 0.206918787183469, 0.330258810368, 0.626535252618706, 0.530963921787962, 0.876571680850281  
"9340", "DRAM1", 162.535898878207, 0.147291092986233, 0.234944386315594, 0.626918971319371, 0.530712350867177, 0.876571680850281  
"9341", "AC106886.3", 3.24671423221911, 0.570334313703747, 0.909841640716059, 0.626850089269255, 0.530757506370552, 0.876571680850281  
"9342", "MIR22HG", 403.42222381865, -0.209571590672505, 0.3349278519372, -0.625721597831765, 0.531497564432272, 0.876571680850281  
"9343", "AC132938.3", 12.6240642751778, -0.304108897642282, 0.486021447984697, -0.625710858858758, 0.531504609499651, 0.876571680850281  
"9344", "SPPL2B", 116.431467199182, 0.118999443688444, 0.190106372494336, 0.625962413185227, 0.531339595242971, 0.876571680850281  
"9345", "KLF2", 4768.8839245096, -0.166103052517409, 0.265421013725573, -0.62580972842319, 0.531439750081825, 0.876571680850281  
"9346", "LINC00649", 11.8628870338086, -0.30024034342802, 0.479148537917492, -0.626612249998601, 0.530913436462547, 0.876571680850281  
"9347", "TCEAL4", 749.486079552523, -0.118902249508645, 0.189896514113293, -0.626142349499411, 0.531221576808968, 0.876571680850281  
"9348", "SNAPIN", 167.336262924637, -0.154081306704942, 0.246661209658381, -0.624667765630193, 0.532189133439058, 0.876650512071284  
"9349", "AP3S1", 1134.4720027785, 0.128614227856398, 0.205693869334956, 0.625270107817167, 0.531793795376703, 0.876650512071284  
"9350", "AC087623.2", 4.47677332072683, -0.48458761401429, 0.775366305418205, -0.6249789430209, 0.531984878345654, 0.876650512071284  
"9351", "GPSM1", 48.0147653044189, -0.20598172771154, 0.32964409164905, -0.62486097257534, 0.532062308810197, 0.876650512071284  
"9352", "TGDS", 54.2994731710742, -0.187956848009079, 0.300704026090032, -0.625055974318095, 0.531934321567139, 0.876650512071284  
"9353", "AC093249.6", 5.8203222057445, -0.413412637333646, 0.661593094311853, -0.624874474791263, 0.532053446277106, 0.876650512071284

"9354", "AKTIP", 118.343821881297, -0.140933750226456, 0.225374092479, -0.625332524587263, 0.531752837597113, 0.876650512071284  
"9355", "AC010618.3", 15.9572465578744, 0.286018813261079, 0.457835162191787, 0.6247200671347, 0.532154800248528, 0.876650512071284  
"9356", "PRX", 11.31019582277, 0.282017881040903, 0.451334279094929, 0.624853670779095, 0.532067101566574, 0.876650512071284  
"9357", "LENG8-  
AS1", 14.1140995809859, -0.278131756987092, 0.445151640526679, -0.624802273351214, 0.532100838452611, 0.876650512071284  
"9358", "TCEA2", 267.363893624871, -0.136238775900902, 0.218044567068115, -0.624820777388792, 0.532088692416362, 0.876650512071284  
"9359", "PARK7", 1933.73787665389, -0.162904127032076, 0.26223548720292, -0.62121312706247, 0.534459403476365, 0.876742061079599  
"9360", "KHDRBS1", 708.425416527587, 0.081161304408836, 0.130588924919384, 0.621502202112, 0.534269246045438, 0.876742061079599  
"9361", "TTC4", 92.692480480383, -0.128402983714949, 0.206343632654644, -0.622277421711657, 0.533759464900252, 0.876742061079599  
"9362", "WDR78", 11.2125789955168, -0.269429224874633, 0.434334761012884, -0.620326183992998, 0.53504305957759, 0.876742061079599  
"9363", "TAF13", 89.0504535416607, -0.14395388543339, 0.231010295790209, -0.623149219133167, 0.533186468307486, 0.876742061079599  
"9364", "ARV1", 72.6584907691857, -0.19325001081311, 0.311025642130464, -0.621331442286835, 0.534381570011628, 0.876742061079599  
"9365", "PGM5P4-  
AS1", 2.59303766861587, -0.555205410699222, 0.89501536732146, -0.620330589809651, 0.535040159519906, 0.876742061079599  
"9366", "ITGAV", 455.638154414871, 0.103358216134903, 0.165755144888957, 0.623559625881567, 0.532916832547207, 0.876742061079599  
"9367", "TYW5", 43.8055608468128, 0.196933838650448, 0.317443240717562, 0.620374962797415, 0.535010952158969, 0.876742061079599  
"9368", "UBA7", 92.3449001483443, 0.140489206918133, 0.226163499039705, 0.621184264988175, 0.53447839120981, 0.876742061079599  
"9369", "DNAJC19", 424.588174289532, -0.133668542225447, 0.214968553790733, -0.621805095993576, 0.534070035051583, 0.876742061079599  
"9370", "LETM1", 64.0561560835109, -0.185566377062987, 0.298330217627297, -0.622016698606157, 0.533930887887034, 0.876742061079599  
"9371", "PI4K2B", 51.0988524181172, -0.150779553687887, 0.242452639897007, -0.621892810702897, 0.53401235276151, 0.876742061079599  
"9372", "C5orf56", 146.734747781173, 0.16310758844288, 0.2620832364581, 0.622350329029746, 0.533711534000424, 0.876742061079599  
"9373", "SAR1B", 215.564580761897, -0.113661807112103, 0.182130992986569, -0.624066257193716, 0.532584072752694, 0.876742061079599  
"9374", "ARHGAP18", 203.717282481616, -0.185904461083619, 0.298305122482438, -0.623202375931589, 0.533151540593305, 0.876742061079599  
"9375", "MOXD1", 64.4542096842771, -0.581547835863803, 0.935776197324407, -0.621460385000792, 0.534296751786891, 0.876742061079599  
"9376", "MALSU1", 241.090232749146, -0.157474626648889, 0.25334061893276, -0.621592492006521, 0.534209859146887, 0.876742061079599  
"9377", "DBF4", 29.3424846395938, -0.215546985959119, 0.345287260136784, -0.624254094615975, 0.532460726249078, 0.876742061079599

"9378", "ST7", 86.4380206269375, -0.167727170768901, 0.270051448722391, -0.621093393730769, 0.5345381756647, 0.876742061079599  
"9379", "FASTK", 186.502551279478, -0.158951727366431, 0.255734262621254, -0.621550377087486, 0.534237559223319, 0.876742061079599  
"9380", "LYN", 23.1025592070589, -0.285225299686086, 0.459027956183636, -0.621368036181178, 0.534357497940278, 0.876742061079599  
"9381", "CPNE3", 619.228545618163, 0.080551307610865, 0.129736239500394, 0.620885173803886, 0.534675176861679, 0.876742061079599  
"9382", "AC027373.1", 3.49019720750117, 0.54056801401662, 0.870030593232853, 0.621320696330897, 0.534388638983846, 0.876742061079599  
"9383", "RNF139-AS1", 9.05777814852816, 0.355658943821444, 0.573217337235806, 0.620460898019098, 0.534954389828786, 0.876742061079599  
"9384", "RAB11FIP2", 215.716158771087, -0.128401726113855, 0.206236653319306, -0.622594112381457, 0.533551281172738, 0.876742061079599  
"9385", "RNH1", 1967.39962855456, -0.149846253529581, 0.240053798346705, -0.62421946480997, 0.532483465388087, 0.876742061079599  
"9386", "BTBD10", 91.1877473709421, -0.120522991257654, 0.194127511863102, -0.62084446506813, 0.534701963810711, 0.876742061079599  
"9387", "LIPT2", 3.59832793820737, 0.545553403941916, 0.87586796298127, 0.622871742088804, 0.533368808808284, 0.876742061079599  
"9388", "THY1", 2891.81457020556, -0.232286417577378, 0.373623488907043, -0.621712564852074, 0.534130888097739, 0.876742061079599  
"9389", "ARHGEF12", 294.625068229712, 0.164568611134391, 0.26504109823051, 0.620917330304989, 0.534654017887919, 0.876742061079599  
"9390", "ETV6", 82.2804843353345, 0.158614324322097, 0.255045084585955, 0.621907003538589, 0.534003019670961, 0.876742061079599  
"9391", "ERGIC2", 421.511580424023, -0.111830632612675, 0.179388021805445, -0.623400779423059, 0.533021185917509, 0.876742061079599  
"9392", "RESF1", 172.23987587981, 0.118246117271911, 0.189809256701079, 0.622973396171771, 0.533302004465531, 0.876742061079599  
"9393", "AC008035.1", 2.79235923399709, 0.571982009999896, 0.922179807649643, 0.620249982980765, 0.535093218917696, 0.876742061079599  
"9394", "MMP17", 64.6809996398058, -0.165063261304505, 0.266112751242904, -0.620275655839723, 0.535076319485441, 0.876742061079599  
"9395", "CDAN1", 16.4191080582074, -0.223389978544976, 0.357788714848241, -0.624362841180525, 0.532389322655762, 0.876742061079599  
"9396", "EID1", 3661.37693658705, -0.118571429765073, 0.190615222582041, -0.622045963375458, 0.53391164519145, 0.876742061079599  
"9397", "C15orf65", 16.5997301767894, -0.254023159868765, 0.407103722933041, -0.623976509078858, 0.532643012419644, 0.876742061079599  
"9398", "SYNM", 24.0095499802797, -0.305278437447612, 0.492030145552593, -0.620446613295935, 0.534963791785906, 0.876742061079599  
"9399", "LUC7L", 162.146232022982, -0.152983884441849, 0.246602058750723, -0.620367426033909, 0.535015912980134, 0.876742061079599  
"9400", "MYH3", 2.5782871441534, 0.603702740481325, 0.967874741770596, 0.623740567273129, 0.532797976615666, 0.876742061079599  
"9401", "ZNF18", 19.2876032565961, -0.220335785031863, 0.354614117519948, -0.621339574895714, 0.53437622019916, 0.876742061079599  
"9402", "VTN", 3.25008914618159, -0.566437623663121, 0.908902366043783, -0.

623210638265448,0.533146111769124,0.876742061079599  
"9403","PDE4A",150.876933874611,-0.121675142352059,0.196113089127692,-  
0.62043356153976,0.534972382298382,0.876742061079599  
"9404","KPTN",28.3198638557983,0.189972876348738,0.30595306807707,0.62  
0921625472583,0.534651191700155,0.876742061079599  
"9405","ZNF419",13.3830843871855,0.2750900398517,0.442105056481989,0.6  
22227761972922,0.533792113567066,0.876742061079599  
"9406","LPIN3",88.877677525314,-0.152498130081628,0.245897007959287,-0  
.620170742813093,0.535145381297304,0.876742061079599  
"9407","CD40",178.957032077593,-0.136611790333812,0.21970326578883,-0.  
621801363959325,0.53407248935377,0.876742061079599  
"9408","AP001505.1",11.0064117274837,-0.311612345183737,0.501703341674  
38,-0.621108769464769,0.534528059689038,0.876742061079599  
"9409","MFNG",2.87221457651323,-0.507984460706185,0.818341278930675,-0  
.620748914645938,0.534764840058343,0.876742061079599  
"9410","PRPF3",68.4697029769799,-0.137354826321025,0.221566344622006,-  
0.619926399721732,0.535306244105745,0.87680761312196  
"9411","DCTN1",222.949449021693,0.131185307246855,0.211745947401399,0.  
619541053119527,0.535559985824017,0.87680761312196  
"9412","LCA5",153.686254410665,0.128235694473667,0.206900404534053,0.6  
19794314865928,0.535393212066069,0.87680761312196  
"9413","AK3",574.741710123572,0.12018084573479,0.194130180193791,0.619  
073477471762,0.535867954798702,0.87680761312196  
"9414","RPP25L",89.5749821765558,0.174309955938405,0.28154457635121,0.  
619120276431692,0.535837126620305,0.87680761312196  
"9415","ZBTB26",14.750136265647,0.270846170435647,0.437438539514485,0.  
619163941833429,0.535808363436251,0.87680761312196  
"9416","LSP1",1534.5532726461,0.144555189482421,0.233309482250627,0.61  
9585574010814,0.535530666763219,0.87680761312196  
"9417","PITPNA-  
AS1",126.263617310009,-0.168981930002738,0.272598029618476,-0.61989417  
2526644,0.535327462637304,0.87680761312196  
"9418","ZNF443",9.50923510268469,-0.296394778719604,0.478432079278661,  
-0.619512761699597,0.535578617449448,0.87680761312196  
"9419","ALKBH6",36.2011210718919,0.215458208913355,0.348031147985936,0  
.619077373275976,0.535865388456576,0.87680761312196  
"9420","E2F1",6.44237023906573,0.41674726573154,0.672873928397525,0.61  
9354158548005,0.535683073344069,0.87680761312196  
"9421","SON",1498.2291703077,0.121823304857094,0.196746001542776,0.619  
190753061415,0.535790702784358,0.87680761312196  
"9422","GPR89A",39.5427461446518,0.179895409264759,0.29076571100165,0.  
618695404781542,0.536117037791975,0.876846278072111  
"9423","XYLB",17.3049192038274,0.259263186953001,0.418909815627388,0.6  
18899766205553,0.53598239254319,0.876846278072111  
"9424","PSMB1",1566.77754497141,-0.160050181699642,0.258675183391968,-  
0.618730330451219,0.536094025513488,0.876846278072111  
"9425","AKR1B10",5.82238209899689,-0.459338315161872,0.742540533034852  
, -0.618603691955376,0.536177469096391,0.876846278072111  
"9426","ARHGEF40",151.033471455211,-0.160418202462877,0.25935831651525  
1,-0.618519601061046,0.536232881179747,0.876846278072111

"9427", "PAFAH1B1", 442.234821723741, 0.0854158781365093, 0.13808696363667  
7, 0.618565836245399, 0.536202413934682, 0.876846278072111  
"9428", "IP6K1", 101.95520503711, 0.118948605964787, 0.192905609448773, 0.6  
166155888607, 0.537488309783021, 0.877038456155951  
"9429", "AC104162.2", 11.4425468028649, -0.326623874532238, 0.528554502586  
004, -0.617956848223218, 0.536603783934084, 0.877038456155951  
"9430", "MITF", 319.1446319448, -0.180229129813625, 0.292207097897351, -0.6  
16785598674736, 0.537376152185781, 0.877038456155951  
"9431", "HMGXB3", 96.9960580917562, 0.129323142777849, 0.20971824411605, 0.  
616651847925482, 0.537464388238698, 0.877038456155951  
"9432", "CDKN1A", 1732.23261175168, -0.236061144551191, 0.382442250962597,  
-0.617246509654808, 0.537072142622559, 0.877038456155951  
"9433", "MICAL1", 52.1448703530732, -0.209962500404663, 0.339681495423485,  
-0.618115803284782, 0.536499005734886, 0.877038456155951  
"9434", "LINC01013", 2.49235791539157, 0.602956002929827, 0.97586044893105  
1, 0.617871134740935, 0.53666028784918, 0.877038456155951  
"9435", "AP5Z1", 82.482932816054, -0.119625728431123, 0.193775704262893, -0.  
.61734121357561, 0.537009688128718, 0.877038456155951  
"9436", "ZNF395", 144.562416346703, 0.144024055986518, 0.233039946976335, 0.  
.618023037917803, 0.536560152509317, 0.877038456155951  
"9437", "PTRH1", 86.9303991125299, -0.170921428447794, 0.276991207772626, -  
0.617064454219421, 0.537192213166087, 0.877038456155951  
"9438", "ANKRD49", 92.5830683686889, -0.164024882053534, 0.265801920646631  
, -0.617094419989523, 0.537172448992872, 0.877038456155951  
"9439", "TPTE2", 2.58799548586557, 0.736475346584097, 1.19300358847389, 0.6  
17328693475441, 0.537017944562851, 0.877038456155951  
"9440", "TRAP1", 120.229724641208, -0.113338717871804, 0.183760706058737, -  
0.616773413112463, 0.537384190762147, 0.877038456155951  
"9441", "FCSK", 21.7946401942213, 0.222378477922778, 0.360186719070456, 0.6  
17397772179598, 0.536972391108326, 0.877038456155951  
"9442", "AC130343.2", 2.71581298390205, -0.575621037885854, 0.931909036825  
883, -0.617679424857216, 0.536786677386666, 0.877038456155951  
"9443", "ADPRM", 32.4400760409294, 0.210945373540949, 0.341422601167443, 0.  
617842441653404, 0.536679203532498, 0.877038456155951  
"9444", "AC010327.7", 4.19561395365221, 0.445370683594264, 0.7220396173733  
22, 0.616823056350369, 0.537351442470343, 0.877038456155951  
"9445", "AC245452.1", 45.4868159301244, -0.200199068567154, 0.324260922228  
097, -0.617401157042062, 0.536970159035052, 0.877038456155951  
"9446", "CXorf40B", 38.8234462939329, -0.189853929069936, 0.30740687302467  
1, -0.617598192265206, 0.53684023652026, 0.877038456155951  
"9447", "FLNA", 995.732123522695, -0.126862655231374, 0.205600408022909, -0.  
.617035036317817, 0.53721161634357, 0.877038456155951  
"9448", "ACD", 65.3676815942282, -0.140521417348203, 0.228023292163775, -0.  
61625904974337, 0.537723561274783, 0.877329455657364  
"9449", "Z95115.1", 5.07584835050541, 0.437193899572147, 0.709732980336255  
, 0.615997722643542, 0.537896022844974, 0.877517958742224  
"9450", "MAP2K1", 123.264461612514, 0.120883012240718, 0.196382970923486, 0.  
.615547324048867, 0.53819332640323, 0.877910066296909  
"9451", "FAM185A", 21.6745761860993, -0.197682023160005, 0.321390058454771  
, -0.615084436993638, 0.538498959364347, 0.877944099270377



"9452", "EIF5AL1", 16.4923521235114, -0.334859990405229, 0.544323601562127, -0.615185506276471, 0.538432218369419, 0.877944099270377  
"9453", "MTRNR2L8", 4.83447042091845, 0.564399321975843, 0.917261567309137, 0.615309026444393, 0.538350657590711, 0.877944099270377  
"9454", "RASSF2", 116.796579380715, -0.251560762615019, 0.408856358486557, -0.615279076363662, 0.538370433159625, 0.877944099270377  
"9455", "EMD", 208.034454400965, -0.111251981982031, 0.180855785276202, -0.61514195861707, 0.538460974511879, 0.877944099270377  
"9456", "CDA7L", 33.3329507378855, 0.228343364477757, 0.371353486046705, 0.614894899489481, 0.538624131442577, 0.878001348756365  
"9457", "FAM78A", 5.69346109268198, 0.403106543611248, 0.655608343437961, 0.614858776045142, 0.538647989308397, 0.878001348756365  
"9458", "ANGEL2", 120.823324321861, 0.124803255227916, 0.203141398769014, 0.614366426460545, 0.538973216281788, 0.87806722986512  
"9459", "IKZF4", 50.903989266786, 0.196041408529986, 0.319038239625939, 0.614476210625525, 0.538900688609886, 0.87806722986512  
"9460", "AC073548.2", 3.46543274905778, 0.849840383281218, 1.38310551289313, 0.614443638145549, 0.53892220674143, 0.87806722986512  
"9461", "ELK1", 54.4474710723187, -0.14421612221904, 0.234712131417715, -0.614438296597375, 0.538925735532458, 0.87806722986512  
"9462", "GRIA3", 51.2065126340186, -0.262513945312289, 0.427097145911342, -0.614646920086846, 0.538787921046097, 0.87806722986512  
"9463", "FNIP2", 177.645724278894, -0.154773157280299, 0.252001473398424, -0.614175604583061, 0.53909929224658, 0.878179815067213  
"9464", "AC026304.1", 17.6878165784953, 0.239359421522349, 0.389811675259609, 0.61403861585967, 0.539189809772351, 0.878234458753254  
"9465", "AC012313.1", 14.734943407561, 0.291015404661868, 0.47405125586471, 0.613890167068603, 0.53928790832055, 0.878301437587033  
"9466", "TTC39B", 59.7228405630246, 0.152407910404228, 0.248349771669366, 0.613682506650871, 0.539425150342532, 0.878432145840918  
"9467", "TMEM30A", 339.518349018625, 0.0972091207812056, 0.158470392941222, 0.613421339955037, 0.53959777930214, 0.878527647649186  
"9468", "RTL8A", 316.270160990582, -0.140711488243136, 0.229367120928734, -0.613477152581326, 0.539560885307912, 0.878527647649186  
"9469", "GPX7", 163.84541461614, 0.145904783619569, 0.238229955056185, 0.612453558097506, 0.540237715943048, 0.878563240398904  
"9470", "RIT1", 94.2723727717901, -0.140148893525461, 0.229309552227044, -0.611177738407936, 0.541081919423401, 0.878563240398904  
"9471", "RRNAD1", 64.5213982122129, -0.195723434744649, 0.319670393595099, -0.612266380203342, 0.540361529362535, 0.878563240398904  
"9472", "COPA", 503.045476095826, 0.113681222920329, 0.185668521492601, 0.61228054172263, 0.540352161381249, 0.878563240398904  
"9473", "AL513217.1", 2.86587064833598, -0.527637421156, 0.862243485211154, -0.611935526572042, 0.540580415337508, 0.878563240398904  
"9474", "HIST3H2A", 106.394559097535, 0.279334562056788, 0.456139947332362, 0.612387850900621, 0.540281177967197, 0.878563240398904  
"9475", "TMEM198", 8.58142616771744, -0.360740182603478, 0.588433640892759, -0.613051595853988, 0.53984222429575, 0.878563240398904  
"9476", "U73166.1", 4.63607030906327, 0.443932111832006, 0.726343920369016, 0.611187206752509, 0.541075651840836, 0.878563240398904

"9477", "AP001816.1", 57.9911005428141, -0.181284872642991, 0.296768811396405, -0.610862279597306, 0.541290758511042, 0.878563240398904  
"9478", "ZCCHC9", 180.046433047351, -0.137907185085953, 0.225714362461712, -0.610980992001986, 0.541212164160165, 0.878563240398904  
"9479", "PDLIM7", 261.378456443487, -0.16267264117518, 0.265512412304583, -0.612674337004516, 0.540091694551102, 0.878563240398904  
"9480", "HIST1H2BJ", 3.3301212107137, 0.538026135941249, 0.879723582647333, 0.611585441784087, 0.54081207251037, 0.878563240398904  
"9481", "UQCC2", 175.679260854881, -0.201983542521643, 0.32974179509651, -0.612550624534951, 0.540173514550109, 0.878563240398904  
"9482", "LEMD2", 74.9609351398795, 0.178373961739183, 0.291536045177382, 0.61184187921138, 0.540642378558564, 0.878563240398904  
"9483", "PEX2", 232.618990188986, 0.144846707502931, 0.237230432300707, 0.610573888426453, 0.541481713577612, 0.878563240398904  
"9484", "RRM2B", 70.1504766348325, 0.14718510390852, 0.241028264875203, 0.61065495362018, 0.54142803374613, 0.878563240398904  
"9485", "NELFB", 182.54397308679, -0.106736037937593, 0.174409915785528, -0.611983770858802, 0.540548495146609, 0.878563240398904  
"9486", "RNF141", 94.8486112341828, 0.122874149996135, 0.201131618881025, 0.610914140102547, 0.541256423211461, 0.878563240398904  
"9487", "BDNF-  
AS", 40.3151446569285, 0.152306677951779, 0.248996606986869, 0.611681740546009, 0.54074834500375, 0.878563240398904  
"9488", "TRAF6", 47.2665397520109, -0.163532736470449, 0.266984708247827, -0.612517239446727, 0.540195595584734, 0.878563240398904  
"9489", "JAML", 7.38377586684826, -0.434035129337447, 0.710421976145024, -0.610953973711033, 0.54123005130151, 0.878563240398904  
"9490", "CERS5", 126.525998508082, -0.110036203369139, 0.179868764428101, -0.611758265638855, 0.540697705769098, 0.878563240398904  
"9491", "SLC11A2", 85.1119022305991, 0.140601324525538, 0.230120771599851, 0.610989279881367, 0.541206677326401, 0.878563240398904  
"9492", "COG3", 61.5146926823066, 0.138687391954669, 0.226411374052754, 0.612546046040755, 0.54017654275828, 0.878563240398904  
"9493", "BLOC1S6", 523.753169569708, 0.0987447618320162, 0.161016734772692, 0.613257758402657, 0.53970591940149, 0.878563240398904  
"9494", "AMDHD2", 110.067925799574, 0.15596071776485, 0.255252873291965, 0.611004748951281, 0.541196436395617, 0.878563240398904  
"9495", "EVI5L", 15.0772338482918, 0.296831555317211, 0.485575540321519, 0.611298409142822, 0.541002043993674, 0.878563240398904  
"9496", "TUBA8", 2.91774103328988, -0.696588454679346, 1.13900364361465, -0.611577020481434, 0.540817645643361, 0.878563240398904  
"9497", "DRG1", 150.485138096281, 0.126884109827365, 0.207820855926208, 0.610545603143978, 0.541500444179694, 0.878563240398904  
"9498", "CDPF1", 28.161901995383, -0.205789289237185, 0.336154373530432, -0.612186856520418, 0.540414136552765, 0.878563240398904  
"9499", "RPGR", 58.191069823366, -0.215063291566249, 0.351073285973788, -0.612588026940638, 0.540148776981524, 0.878563240398904  
"9500", "HMGB3", 10.2837692682968, -0.315109042908047, 0.515959335975923, -0.610724568656224, 0.541381938112322, 0.878563240398904  
"9501", "UBL4A", 109.661943037718, -0.181835066263425, 0.29768672492342, -0

.610826923203252,0.54131416755258,0.878563240398904  
"9502","KAT2A",23.1464661093657,0.248567449202324,0.407283201469712,0.  
610306166091187,0.541659013098894,0.878635555816001  
"9503","EIF2S2",725.19668760859,-0.0976327361429876,0.15997050788012,-  
0.610317098050051,0.541651772825203,0.878635555816001  
"9504","BAIAP2-  
DT",23.7943739432483,0.207739283711457,0.340513312036561,0.61007683508  
4649,0.541810910942839,0.878728472045731  
"9505","DLGAP4",556.620324007339,0.105587846778034,0.1730813363326,0.6  
10047559230375,0.541830303392454,0.878728472045731  
"9506","CORO1B",315.082372371084,-0.139433461480807,0.228712700004854,  
-0.609644595502776,0.542097263456941,0.87879691832236  
"9507","C12orf4",51.0172825495704,0.14215665988898,0.233189324283833,0  
.609619073795804,0.542114173581084,0.87879691832236  
"9508","ACTR10",415.817691193108,-0.133173540217705,0.21849304659846,-  
0.609509283205919,0.542186921421912,0.87879691832236  
"9509","BCL11B",11.4964538159196,0.477775999228933,0.783796954557659,0  
.609566031675345,0.542149318970143,0.87879691832236  
"9510","RGS9",189.128962063518,-0.18919420863544,0.310425391634296,-0.  
609467568485265,0.542214563098538,0.87879691832236  
"9511","GRK3",21.5678247104821,-0.211348964495977,0.346658242681083,-0  
.609675289591809,0.542076926574207,0.87879691832236  
"9512","EPS15",380.572586332294,0.104940688916509,0.172276535443343,0.  
609140929415902,0.542431030206267,0.878803273474277  
"9513","HNRNPH1",752.921384772591,0.1283388858592,0.210691344756419,0.  
609132216644083,0.542436804840623,0.878803273474277  
"9514","ITGB4",2.47425155695754,0.648928866376494,1.06535899617009,0.6  
09117554466955,0.542446522679711,0.878803273474277  
"9515","SMARCB1",252.316912390675,-0.161787040833824,0.265545076844145  
, -0.609263944022508,0.542349502090155,0.878803273474277  
"9516","TRAF3IP2",102.144072921306,-0.140395271607036,0.23054679175642  
1, -0.608966494555982,0.542546647646379,0.878819865589622  
"9517","SLC48A1",102.489620115796,0.137698371528217,0.226131663076211,  
0.608930079295484,0.542570785651407,0.878819865589622  
"9518","ASB9",3.21970502324746,-0.502176055157083,0.825271422910543,-0  
.608498054356497,0.542857195995076,0.879191392757312  
"9519","GREB1",9.94616587065742,0.441839391326322,0.726486227185043,0.  
608186879245243,0.543063535765028,0.87922025188551  
"9520","FOXO1",390.266721354834,0.157591689974004,0.259103530205886,0.  
608218999751877,0.543042234895354,0.87922025188551  
"9521","STAT5A",99.2667934442316,-0.158772078064705,0.260988844387252,  
-0.608348140080351,0.542956599060506,0.87922025188551  
"9522","RAMP2-  
AS1",172.553084242892,0.189132428594808,0.311008044448096,0.6081271271  
63013,0.543103161755032,0.87922025188551  
"9523","EFEMP2",1065.60599323618,0.166245251216589,0.273480683869152,0  
.607886629741389,0.543262667801805,0.879342366450324  
"9524","EEF2KMT",37.3320136935759,-0.242743244500181,0.399409454013835  
, -0.607755380001029,0.543349726917894,0.879342366450324  
"9525","CFAP20",206.290894260785,-0.158100965128324,0.260124014742016,

-0.607790731221507,0.543326277456624,0.879342366450324  
"9526","AC005041.4",8.51341555150908,-0.325108867386218,0.535262238102  
097,-0.607382408553555,0.543597160089402,0.879468455073856  
"9527","SIX4",6.06501892163594,-0.381662962192225,0.628458732894673,-0  
.607299958160006,0.543651866112391,0.879468455073856  
"9528","C1QTNF1-  
AS1",2.77479510712941,0.570446582314637,0.939083548442876,0.6074502990  
28784,0.543552116661806,0.879468455073856  
"9529","CHAF1A",29.2671080009089,-0.194148182103238,0.319693914656827,  
-0.607293955881657,0.54365584874465,0.879468455073856  
"9530","EGLN1",159.001686837333,0.120660242679868,0.198822175144381,0.  
606875176736432,0.543933752955401,0.879723242957307  
"9531","LINC02308",9.26901692459862,0.424952067377731,0.70031810603305  
3,0.606798630103781,0.543984557370681,0.879723242957307  
"9532","SPECC1",16.7604194283014,-0.329202141003775,0.542387656599475,  
-0.606949913034016,0.543884152346287,0.879723242957307  
"9533","MIB2",95.4063117309369,-0.121418235650507,0.200333734503125,-0  
.606079829498774,0.544461744329174,0.879834612438308  
"9534","AKR7A2",523.414454578314,-0.180290120145078,0.297230830384473,  
-0.606566014406613,0.544138960151722,0.879834612438308  
"9535","HES6",16.4196835580241,-0.249477298817069,0.411514134762356,-0  
.606242356562402,0.544353830012878,0.879834612438308  
"9536","FBXL5",224.84216167454,-0.084938851507955,0.14015924384285,-0.  
60601676478214,0.544503620746046,0.879834612438308  
"9537","DNAJC15",586.123142978908,-0.16180784148652,0.267041179194286,  
-0.605928426375007,0.544562282163594,0.879834612438308  
"9538","LM07-  
AS1",7.75927360029814,0.607412802714291,1.00153168982624,0.60648385755  
989,0.544193498417701,0.879834612438308  
"9539","AC011939.2",38.1150631298769,0.355541274915786,0.5863119036110  
12,0.606402961846856,0.544247202159262,0.879834612438308  
"9540","VPS33B",25.2025973544742,0.228251952045344,0.376590845221397,0  
.606100639305649,0.544447926491795,0.879834612438308  
"9541","AC100793.2",6.57089182669515,0.353306767892271,0.5830903349160  
63,0.605921152754368,0.544567112375861,0.879834612438308  
"9542","ZCWPW2",40.9483948094726,0.171040791486674,0.282410978891619,0  
.605644979377074,0.544750527299919,0.880038710786863  
"9543","PLCD4",4.96239619338627,-0.405257868108291,0.669642616913296,-  
0.605185300147591,0.545055881927658,0.88035776595532  
"9544","EVC2",100.665780894898,0.227140591559253,0.375433036641453,0.6  
0500960062334,0.545172617635439,0.88035776595532  
"9545","AC136475.1",19.073862852391,0.257882803927368,0.42617006488158  
2,0.605117123838871,0.545101177159861,0.88035776595532  
"9546","CLUH",34.1639907951353,-0.163710338140117,0.270632344686988,-0  
.604917857580783,0.545233577137557,0.88035776595532  
"9547","ZZEF1",81.6259383244965,0.144056373293531,0.238108657291335,0.  
605002669505092,0.545177222962081,0.88035776595532  
"9548","PRR13",341.271629704226,-0.119692830317782,0.197977407679146,-  
0.604578227995406,0.545459276557916,0.880445523365474  
"9549","MAX",232.545154665624,0.0940490233868996,0.155538524976138,0.6

04667064968812,0.545400235842048,0.880445523365474  
"9550","AL391097.1",3.36608413103931,0.699249139539107,1.1564877662970  
1,0.604631678705995,0.5454237530382,0.880445523365474  
"9551","LINC01060",12.11565241555,-0.84732019206931,1.40344238426244,-  
0.603744194682141,0.546013726534869,0.880606547257596  
"9552","ZUP1",27.7059980767058,0.19537470032869,0.323355853277968,0.60  
420956771962,0.545704320661757,0.880606547257596  
"9553","AC124242.3",3.1206428094439,0.516765943712367,0.85560150519547  
9,0.603979703839232,0.545857136082204,0.880606547257596  
"9554","RNF208",20.4046402719571,0.244728677325598,0.405038459784475,0  
.604210961733907,0.545703393974196,0.880606547257596  
"9555","NUP160",96.2541729637582,-0.157819064415813,0.261343523310322,  
-0.603875934696176,0.545926129623451,0.880606547257596  
"9556","ADGRL1",28.8988605861626,-0.177887581527748,0.294683020803925,  
-0.603657384271591,0.546071452546335,0.880606547257596  
"9557","SAMHD1",747.625708850422,-0.14256180308115,0.236164450800208,-  
0.603654794775848,0.54607317452062,0.880606547257596  
"9558","BCAS4",6.59021846109718,0.349175768840314,0.578331380391,0.603  
764175141667,0.546000440627705,0.880606547257596  
"9559","TBC1D10A",67.5624146596457,-0.172231975827647,0.28509328476321  
5,-0.604124983058423,0.545760550780795,0.880606547257596  
"9560","COG2",77.2683085489634,-0.134609393473528,0.223119027310583,-0  
.603307548872335,0.546304112010291,0.880787700583299  
"9561","PDIA6",979.884859169712,-0.127420717311418,0.211351762132819,-  
0.602884575106326,0.546585478026587,0.880787700583299  
"9562","UBE2B",999.988492155475,-0.101604734974127,0.168406678226202,-  
0.603329606903431,0.546289440775618,0.880787700583299  
"9563","RNF217-  
AS1",3.89029372376635,0.488480877336057,0.810024608986622,0.6030444901  
50946,0.54647909263866,0.880787700583299  
"9564","PANK1",2.7357724243762,0.533405184303005,0.884637305641536,0.6  
02964831916263,0.546532084945732,0.880787700583299  
"9565","SCUBE2",9.47534073525639,0.348839287993829,0.578561817130506,0  
.602942119001161,0.546547195083751,0.880787700583299  
"9566","CYP2R1",16.0317013771862,0.231839742018219,0.384547756398116,0  
.602889337308208,0.546582309766883,0.880787700583299  
"9567","ZNF501",21.2995740319282,0.20341561719633,0.337916420390528,0.  
601970206009058,0.547193969902289,0.880810549752853  
"9568","LIN54",36.0000755924466,0.192625861346566,0.32004233422837,0.6  
01876191820033,0.547256553210239,0.880810549752853  
"9569","TUBB",2662.4981965976,0.143328370288124,0.237943683523851,0.60  
2362576578997,0.546932815141036,0.880810549752853  
"9570","KIAA0895",3.15877531800786,-0.599897780960788,0.99599374199215  
7,-0.602310793400057,0.546967277554726,0.880810549752853  
"9571","ZNF782",15.9152873470257,0.251524341948334,0.417848090557005,0  
.601951636569748,0.547206330914633,0.880810549752853  
"9572","TSPAN4",1704.99506436795,0.126969948380442,0.210998555538331,0  
.601757429364846,0.547335615991267,0.880810549752853  
"9573","IVD",101.510520134764,0.147570615796421,0.245148258635605,0.60  
1964772736866,0.547197586623181,0.880810549752853

"9574","CIA02B",553.598716449317,-0.155899857833023,0.259115648038489,-0.601661300709502,0.547399615091296,0.880810549752853  
"9575","MPP3",12.4063615051857,0.294776446385256,0.489261151593861,0.602493055957879,0.546845984096988,0.880810549752853  
"9576","SKAP1",4.52871796409382,0.525922420974394,0.872893605599169,0.602504609497502,0.546838295809414,0.880810549752853  
"9577","DHX40",198.837572200205,0.124090145251199,0.205877525129956,0.602737696467205,0.546683199827512,0.880810549752853  
"9578","FUZ",81.4128267397674,0.162308054145922,0.269705969274113,0.601796299068792,0.547309738951541,0.880810549752853  
"9579","ZNF614",25.7407353867304,0.198023584221999,0.329124517897814,0.60166767728766,0.547395369673722,0.880810549752853  
"9580","ATP5PF",1405.67146897988,-0.144685255590764,0.240171815183196,-0.602423958366648,0.546891966114288,0.880810549752853  
"9581","BTBD19",27.1336983473447,-0.240269825808789,0.399648511374686,-0.601202854434073,0.54770488351888,0.881025856145626  
"9582","PPP2R1A",397.464544075234,0.0943976106842415,0.156995245842456,0.601276874198912,0.547655589827452,0.881025856145626  
"9583","USP11",172.572341496884,0.12221630254361,0.203230692134674,0.601367348897391,0.547595340901661,0.881025856145626  
"9584","SLC03A1",273.646860383881,-0.135211836839369,0.224983249087854,-0.600986239586975,0.547849151449097,0.881165971367678  
"9585","TOPORS",314.834658774302,-0.149363043813077,0.248695163315498,-0.600586846249169,0.54811520115307,0.88150191192223  
"9586","AL513548.1",6.44734076118171,-0.447523000723671,0.745882909705268,-0.599990956892293,0.548512262288447,0.881550145318543  
"9587","AL157786.1",3.45328557184241,-0.47198090662231,0.786771562715575,-0.599895737198798,0.548575723534558,0.881550145318543  
"9588","OSBPL5",71.9288722961445,0.124458975690284,0.207310009345459,0.600351985334614,0.548271679927198,0.881550145318543  
"9589","PCK2",47.6864595844064,0.220250384189427,0.367192434114506,0.599822773365596,0.548624354329301,0.881550145318543  
"9590","CYB5D2",214.411720771765,0.155123814837802,0.258402453032618,0.600318661906128,0.548293883830652,0.881550145318543  
"9591","TMEM100",180.130640232054,-0.253332122811055,0.422276529118282,-0.599919970309541,0.548559572504289,0.881550145318543  
"9592","PCNA",152.67015726819,-0.137355858319259,0.229014421800626,-0.599769469709805,0.548659882853461,0.881550145318543  
"9593","ZMYND8",144.25500436945,0.149132574082451,0.248505637504293,0.600117468481475,0.548427951482947,0.881550145318543  
"9594","GAB3",17.575108994973,-0.276499339508065,0.460887150692317,-0.599928505476284,0.54855388399063,0.881550145318543  
"9595","BRAF",124.652619085416,0.146631871563518,0.244579571750291,0.599526242172119,0.548822015895365,0.881626862758133  
"9596","MCM5",56.6848242880378,-0.161755987949459,0.269779438080063,-0.599586051111333,0.548782145662749,0.881626862758133  
"9597","FASTKD2",98.9819554397345,0.114607334579813,0.191314578402391,0.599051758297062,0.54913837014312,0.881968871547957  
"9598","TULP3",295.501751665828,0.082613483203042,0.137910878058152,0.599035292692479,0.549149349926519,0.881968871547957

"9599", "BSCL2", 283.183692032527, -0.153037276689102, 0.255524256676836, -0.598914868902835, 0.549229655592211, 0.882005952802785  
"9600", "NFIL3", 681.45932763804, -0.233687035254155, 0.390248461815913, -0.598816031629586, 0.549295570426985, 0.882019918555413  
"9601", "CD53", 28.2754366493576, -0.253705971593, 0.424083191167761, -0.598245761390333, 0.549675961313995, 0.882248542043908  
"9602", "DUSP4", 4.93643332798323, -0.470482287200756, 0.786618982294569, -0.598106958757031, 0.549768567337462, 0.882248542043908  
"9603", "SAMD12", 3.77566462469461, 0.579940067920771, 0.97026241199223, 0.597714660232984, 0.550030341737973, 0.882248542043908  
"9604", "TRIB1", 87.3599334608714, -0.529305697251847, 0.885396400921881, -0.597817764676624, 0.549961535878019, 0.882248542043908  
"9605", "CDC42EP2", 208.906621931459, 0.218408736883384, 0.365189572774906, 0.598069477241087, 0.549793575487977, 0.882248542043908  
"9606", "RALGAPA1", 185.390552431219, 0.147292804317215, 0.246317926395938, 0.597978419485606, 0.549854332731286, 0.882248542043908  
"9607", "FCF1", 115.948630155418, 0.1307513494217, 0.218481567683656, 0.598454829887605, 0.549536489986223, 0.882248542043908  
"9608", "JMJD7", 20.7133959459405, -0.212100749727652, 0.354463108657058, -0.598371860279707, 0.549591837611375, 0.882248542043908  
"9609", "DRG2", 135.403500862807, -0.124329691281044, 0.208017585089655, -0.59768836960326, 0.550047887241158, 0.882248542043908  
"9610", "CIRBP", 2593.24585747557, -0.130629648809958, 0.218363527115972, -0.598221005747818, 0.54969247716357, 0.882248542043908  
"9611", "HDHD5", 62.1965310155351, -0.184467414659774, 0.308649960963791, -0.59765895995501, 0.550067514601622, 0.882248542043908  
"9612", "USP18", 59.0442173697246, 0.246059279615678, 0.411987200799783, 0.597249815377779, 0.550340604585825, 0.882594716988191  
"9613", "AC105285.1", 3.94760869039436, 0.439821750295578, 0.736639018710131, 0.597065508511502, 0.550463644908688, 0.882662408239883  
"9614", "ARL6IP4", 1413.0929253016, -0.13570003724272, 0.227309663964753, -0.596983141305255, 0.55051863631918, 0.882662408239883  
"9615", "AREL1", 24.6234833889188, 0.2248296512339, 0.376643693528615, 0.596929286476473, 0.550554593268016, 0.882662408239883  
"9616", "NOSIP", 239.777927209144, -0.135532224535683, 0.227103605399004, -0.596785877958929, 0.550650347658783, 0.882724117009166  
"9617", "ZNF354C", 50.8861691955497, 0.173170004377042, 0.290367927798959, 0.596381307294169, 0.550920525136862, 0.883016731056232  
"9618", "AC008267.5", 23.2550321842057, 0.273189591600367, 0.458175586221911, 0.596255234490062, 0.551004731497236, 0.883016731056232  
"9619", "ZBTB34", 34.9615736193528, 0.182198031752197, 0.305555983356197, 0.596283632710942, 0.550985763247274, 0.883016731056232  
"9620", "SLC19A1", 9.86422743309762, 0.343846693431201, 0.576910157176279, 0.596014282560354, 0.551165685362447, 0.88318285237652  
"9621", "G0S2", 270.947762146513, -0.226587736520328, 0.380509258262352, -0.595485475320818, 0.551519005185002, 0.883421860577006  
"9622", "ZNF2", 13.5254979309299, 0.259727985287677, 0.436145023781685, 0.595508308304545, 0.551503747145898, 0.883421860577006  
"9623", "CXCR4", 117.609633647629, 0.241956246319148, 0.406449473705861, 0.595292310537587, 0.551648094987194, 0.883421860577006

"9624","WDR31",18.1745001038507,0.239077888109568,0.401537513729584,0.595406107611095,0.551572043915399,0.883421860577006  
"9625","MIPEP",38.0373822199077,-0.17127116857998,0.287799936869364,-0.595104955348625,0.551773316486242,0.883421860577006  
"9626","AC008915.2",24.7869054377664,0.224671062424553,0.377444708949053,0.595242315225775,0.551681508697289,0.883421860577006  
"9627","H00K2",62.1147159720179,0.153030373365991,0.257004866216842,0.595437649172272,0.551550965466921,0.883421860577006  
"9628","CRYZL1",114.895857155774,-0.114535323268164,0.192453960177847,-0.595131028544809,0.551755889259201,0.883421860577006  
"9629","ZCCHC18",7.06679256631137,-0.355959930918647,0.598406871382648,-0.594845995160758,0.551946419188418,0.883607233543408  
"9630","RPS6KB2",82.0773648278833,-0.13361501678644,0.224729052162986,-0.594560496297271,0.552137292652776,0.883710070854392  
"9631","DNMT3B",3.55721398319472,0.483087561736795,0.812604734198797,0.594492674489651,0.552182640445638,0.883710070854392  
"9632","STK4",172.207363660108,0.120591551485181,0.202789844997055,0.594662673995993,0.552068976883645,0.883710070854392  
"9633","C5orf51",66.9792596072331,0.138488776284313,0.233045487400584,0.594256416758089,0.552340624070515,0.883871142951  
"9634","CSMD2",9.86220276546968,-0.301822906257259,0.507997577500159,-0.594142412533778,0.552416865703482,0.883901389331448  
"9635","USP2",3.28747238898726,-0.579624289538912,0.975706622380935,-0.594055914189147,0.55247471590955,0.883902205059233  
"9636","ADAMTS4",67.2206176712752,0.652309487140272,1.10056304658972,0.59270524224992,0.553378432516328,0.884215153827136  
"9637","CIR1",549.819894652225,0.120373198444838,0.203539969489528,0.591398331967573,0.554253557757721,0.884215153827136  
"9638","ACAD11",60.1331914141136,0.188312831929902,0.317345275053621,0.593400459162606,0.552913181679638,0.884215153827136  
"9639","AL391840.3",21.3209089316388,0.220640735109605,0.372043818182787,0.593050399781683,0.553147423321211,0.884215153827136  
"9640","AL009176.1",13.010486437855,-0.384874655906921,0.650115092877627,-0.592010030413749,0.553843871703785,0.884215153827136  
"9641","INTS1",131.789137548072,0.117022654615381,0.197835373645404,0.591515321345562,0.554175192459679,0.884215153827136  
"9642","AUTS2",279.569851053331,0.13834985581817,0.233657370467465,0.592105678247519,0.553779824815547,0.884215153827136  
"9643","RBPMS",304.771924626425,0.165461506051268,0.279796284002367,0.59136420142688,0.55427642111136,0.884215153827136  
"9644","ZNF707",8.99482284551686,0.294678878192594,0.496929371106411,0.592999519300887,0.553181473957338,0.884215153827136  
"9645","PHF2",99.7840035256541,0.143762836225261,0.24275399141871,0.592216158362949,0.553705850575558,0.884215153827136  
"9646","AL022345.4",7.25369882846655,-0.34765998952705,0.587848469296393,-0.59141089529955,0.554245141953866,0.884215153827136  
"9647","AL133482.1",39.4778614111693,0.312417296817605,0.526435636991196,0.593457727526204,0.552874865281461,0.884215153827136  
"9648","RIC8A",212.032914748253,-0.110959973125865,0.187165260170883,-0.592844916971014,0.553284944449762,0.884215153827136



"9649", "KLRK1", 6.9298454449358, 0.46163805835932, 0.779567410645444, 0.592172084229517, 0.553735360740418, 0.884215153827136  
"9650", "TRIAP1", 121.657523071491, -0.18031769831262, 0.304031399598017, -0.593089064323725, 0.553121548618878, 0.884215153827136  
"9651", "UBC", 8606.31039632748, -0.119534826935584, 0.201753611704172, -0.592479242011568, 0.55352971697807, 0.884215153827136  
"9652", "IGHA1", 125.547205851782, 0.431267915237864, 0.728067784618064, 0.592345828711679, 0.553619033292955, 0.884215153827136  
"9653", "MPI", 71.4893987352524, 0.195113751187464, 0.329881125726641, 0.591466852666034, 0.554207658531521, 0.884215153827136  
"9654", "AC015871.1", 24.3413128333186, -0.232639109368538, 0.393155485576093, -0.591722913461709, 0.554036150294944, 0.884215153827136  
"9655", "MMP25-AS1", 11.066274786359, 0.289143056032706, 0.488526773244164, 0.591867369136375, 0.553939406072583, 0.884215153827136  
"9656", "GTF3C1", 127.645814574464, 0.125274535136101, 0.211640879288428, 0.591920311223874, 0.553903952000465, 0.884215153827136  
"9657", "SCARF1", 8.2422223198798, -0.352132379748696, 0.594047950218232, -0.592767603388472, 0.553336691564066, 0.884215153827136  
"9658", "RARA", 159.186700777184, -0.139312479142773, 0.234675631304544, -0.593638454782652, 0.552753955095819, 0.884215153827136  
"9659", "MYL12B", 2981.70718120926, -0.16629157152747, 0.28106253489618, -0.591653283099062, 0.554082785790647, 0.884215153827136  
"9660", "ATP9A", 99.4230895564862, 0.147248690753281, 0.248707190122143, 0.592056428609745, 0.55381280248579, 0.884215153827136  
"9661", "Z82215.1", 4.21239949072397, -0.451798873837257, 0.763543100705937, -0.591713648410345, 0.554042355526832, 0.884215153827136  
"9662", "MAPK8IP2", 5.18492788477997, -0.476478138433428, 0.803685842103233, -0.592866159227706, 0.553270727111263, 0.884215153827136  
"9663", "ZNF81", 7.89457236903985, -0.316851840174037, 0.535464266250686, -0.591732931858607, 0.554029440551115, 0.884215153827136  
"9664", "AL109615.4", 3.4931108422938, 0.489908852744521, 0.828763250487179, 0.591132452430213, 0.554431677245114, 0.884354877151324  
"9665", "AL118516.1", 108.292134517365, -0.215401087184552, 0.364430491277772, -0.591062197977205, 0.554478747172724, 0.884354877151324  
"9666", "GNAI3", 594.954575862734, 0.11139193121015, 0.188558912342773, 0.590753997390777, 0.554685262220527, 0.884422413718913  
"9667", "NOLC1", 191.274080406257, -0.113713079869751, 0.192491907836882, -0.590742131176298, 0.55469321413133, 0.884422413718913  
"9668", "AP003555.1", 10.3601353782639, -0.308676151340872, 0.522438033259228, -0.590837825139178, 0.554629088287623, 0.884422413718913  
"9669", "MANEA-DT", 4.31452330693438, 0.413428079990737, 0.700135353808714, 0.590497362748077, 0.55485725332345, 0.884592466644015  
"9670", "CFAP57", 3.44232493478553, -0.594326606256215, 1.00775805914447, -0.58975128093817, 0.55535740956543, 0.884882522527986  
"9671", "AC093702.1", 7.23568239486139, 0.369545817956698, 0.626767310776039, 0.589606081241124, 0.55545477372674, 0.884882522527986  
"9672", "FAHD2A", 138.936445885214, 0.144762412320503, 0.245523857383125, 0.589606296770624, 0.555454629196508, 0.884882522527986

"9673", "SLBP", 220.354048038317, -0.12043810312853, 0.204187434515832, -0.589840914619023, 0.555297309551076, 0.884882522527986  
"9674", "NSUN5", 76.4784304779698, -0.140228346667348, 0.237850561072567, -0.589564918556426, 0.555482377024543, 0.884882522527986  
"9675", "AL162426.1", 3.27025306754726, 0.485157599018272, 0.822976058505227, 0.589516054573282, 0.555515145608123, 0.884882522527986  
"9676", "MTFMT", 39.2586185221913, -0.164072612874375, 0.278322661501841, -0.589505044213905, 0.555522529374774, 0.884882522527986  
"9677", "AC067852.2", 20.6162737226454, 0.206725063425377, 0.350734405493844, 0.589406286316001, 0.555588760534027, 0.884882522527986  
"9678", "ZNF611", 47.4552919722095, -0.168035271398979, 0.285110080197457, -0.589369801595943, 0.555613229682023, 0.884882522527986  
"9679", "RNF114", 225.653709052322, -0.122612468069818, 0.207996738633608, -0.5894922625965, 0.555531101042503, 0.884882522527986  
"9680", "HPCA", 2.86230810904187, -0.596591112676246, 1.0128945431231, -0.588996274811347, 0.555863772549051, 0.885008207585442  
"9681", "OPTN", 802.089193346293, -0.0958326317379217, 0.162728884172206, -0.588909782214865, 0.555921795267586, 0.885008207585442  
"9682", "UBE2G1", 113.476369783112, 0.119450547669257, 0.202778570114487, 0.589068892249396, 0.555815060128413, 0.885008207585442  
"9683", "SPATA2", 34.447636817488, -0.166304775733393, 0.282385879627872, -0.588927378212218, 0.555909990924129, 0.885008207585442  
"9684", "GSTK1", 591.317569622507, -0.149530788112663, 0.254000407596551, -0.58870294550934, 0.556060561647471, 0.885137707331243  
"9685", "RAPGEF4", 9.67159425413219, 0.322100658343468, 0.547295090326193, 0.588531971210436, 0.556175280759537, 0.885217602102157  
"9686", "C5orf24", 313.653699537872, 0.107924294601602, 0.183402184201967, 0.588456975423766, 0.556225604538533, 0.885217602102157  
"9687", "AL445183.2", 2.61703910876267, 0.557443884669811, 0.947852228794519, 0.588112648507214, 0.556456683777847, 0.885273708935766  
"9688", "MAP3K2", 366.347996147149, -0.133980207456122, 0.227833413846152, -0.58806215117592, 0.556490576684241, 0.885273708935766  
"9689", "RAD21", 397.778124997314, 0.11320128071502, 0.192455095256752, 0.588195810373323, 0.556400869213168, 0.885273708935766  
"9690", "MAPT", 10.5529055144176, 0.356967185372817, 0.606774551250853, 0.588302829505517, 0.556329046724485, 0.885273708935766  
"9691", "NAA40", 23.5703017643648, 0.202786665101214, 0.344937537481722, 0.587893873718977, 0.556603528771425, 0.885362026211074  
"9692", "ST6GAL2", 2.92498855588609, -0.563454203351072, 0.958634078551895, -0.587767758269371, 0.556688187978322, 0.885405325803325  
"9693", "FCRLB", 4.76166586987533, -0.409324854005258, 0.696639559605027, -0.587570499495223, 0.556820617101763, 0.885439050307255  
"9694", "FSIP2", 12.8312575675771, 0.363191061748649, 0.618239530773104, 0.587460108373337, 0.556894734570041, 0.885439050307255  
"9695", "SEC22A", 57.7646100961981, -0.147135099225574, 0.250559281897707, -0.587226695858918, 0.557051465395464, 0.885439050307255  
"9696", "RUVBL1", 85.096234342516, -0.146352150774926, 0.249408068639944, -0.586797979604284, 0.557339393896494, 0.885439050307255  
"9697", "HDDC2", 342.151005436764, -0.163353471558667, 0.278382406570553, -0.586795241736182, 0.557341232898559, 0.885439050307255

"9698", "AC084824.5", 3.72810741003296, 0.480808773390636, 0.819094833360372, 0.587000129665203, 0.557203619631089, 0.885439050307255  
"9699", "MAPK7", 72.0388594001469, 0.134698648404192, 0.229505039436403, 0.586909327720961, 0.557264604843671, 0.885439050307255  
"9700", "DUSP3", 120.228090815505, 0.124079120899019, 0.211353178646315, 0.58707004878624, 0.557156662141786, 0.885439050307255  
"9701", "RAB11B", 379.945786246997, -0.106982029142905, 0.18228288009602, -0.586901134580223, 0.55727010775388, 0.885439050307255  
"9702", "ZNF547", 3.76066135764154, 0.512064413527586, 0.872243428290275, 0.587065946178932, 0.557159417388337, 0.885439050307255  
"9703", "TMEM189", 110.989367956501, 0.130579110009901, 0.222286025034193, 0.587437334352507, 0.556910025825039, 0.885439050307255  
"9704", "ZNF619", 17.2837164427051, -0.219666980732426, 0.374453738687277, -0.586633161956169, 0.557450105733859, 0.885520752255507  
"9705", "ZBTB21", 97.0999059689167, -0.172598189596494, 0.294329852320156, -0.586410750509775, 0.557599521630773, 0.885666834202819  
"9706", "COA7", 32.1947476185935, 0.18652364820234, 0.318323306605101, 0.585956618105043, 0.557904668067481, 0.885766565198481  
"9707", "ANKRD17", 355.921171291889, 0.132218988849302, 0.22571427519659, 0.585780357640842, 0.558023125125492, 0.885766565198481  
"9708", "TCAF2", 7.93404942165052, 0.345246294424546, 0.589125094947292, 0.586032232178864, 0.557853854858426, 0.885766565198481  
"9709", "PRKAG2-AS1", 95.170378055937, -0.18103749104537, 0.309081718360037, -0.585726946277964, 0.558059023014373, 0.885766565198481  
"9710", "LPAR1", 489.881025948838, -0.142211923251504, 0.242792422862377, -0.58573460231959, 0.558053877303803, 0.885766565198481  
"9711", "MASTL", 25.4427728785211, -0.219332789774751, 0.37468650951558, -0.585376799549893, 0.558294385174728, 0.885766565198481  
"9712", "ROB04", 40.4922939694902, 0.289862512803278, 0.49515147470163, 0.585401695466916, 0.558277649005879, 0.885766565198481  
"9713", "FGFR10P2", 374.660507149743, -0.112158149913836, 0.191589643832281, -0.585408207199448, 0.558273271563056, 0.885766565198481  
"9714", "PSMA3", 472.935484380194, -0.140302986225629, 0.239656837407081, -0.585432853673649, 0.558256703384446, 0.885766565198481  
"9715", "MRPL12", 140.117964278993, -0.17646680069572, 0.301383954032463, -0.585521552606322, 0.55819707899402, 0.885766565198481  
"9716", "CCDC57", 38.4391478165767, 0.227839359046795, 0.389044160489423, 0.585638809640967, 0.558118262288356, 0.885766565198481  
"9717", "SH3BP5L", 34.5385084044791, 0.205739257872888, 0.35156490797436, 0.585209880753777, 0.558406601888146, 0.885853428846946  
"9718", "LRRC8C-DT", 16.2952859467214, 0.24560004381959, 0.420028744656834, 0.584721990920517, 0.558734664899145, 0.885861527037581  
"9719", "CCDC88A", 280.498946770134, 0.137959135500557, 0.235920087661302, 0.58477061817058, 0.558701963148873, 0.885861527037581  
"9720", "RNF181", 408.447690497454, -0.165561169023667, 0.283095131106328, -0.58482520832011, 0.558665252465876, 0.885861527037581  
"9721", "RBM18", 85.4256699466862, 0.133013721358073, 0.227495359671727, 0.584687624178402, 0.558757777040727, 0.885861527037581

"9722", "DOCK9", 156.508972557966, 0.152085734698273, 0.26015038055311, 0.5  
84607004513778, 0.558811996778289, 0.885861527037581  
"9723", "ZNF69", 11.9311849255694, 0.24936220154308, 0.426548872825391, 0.5  
8460405695447, 0.558813979170512, 0.885861527037581  
"9724", "ZNF566", 74.7291025401225, 0.13266036695604, 0.226883979278764, 0.  
584705748628664, 0.558745588022395, 0.885861527037581  
"9725", "NAB1", 96.8654848793741, -0.161623734580054, 0.276601166542408, -0.  
.584320509563988, 0.559004696014577, 0.885997566240704  
"9726", "LINC02019", 4.77644526716625, -0.412111536834872, 0.7053014038683  
68, -0.584305567200863, 0.559014747275841, 0.885997566240704  
"9727", "UBE2D3", 1169.9763184708, -0.0898524732149757, 0.153837632113062,  
-0.584073428463453, 0.559170911029587, 0.886153962529154  
"9728", "WDR89", 28.6429044091803, 0.190895189779041, 0.326905004611533, 0.  
58394697874352, 0.559255984857759, 0.886197677485851  
"9729", "TMEM256", 368.121151603578, 0.159018302229076, 0.272476840214097,  
0.583603003118096, 0.55948743924497, 0.886473314416816  
"9730", "PTPRU", 37.5272851733232, -0.181326095008873, 0.310958685497479, -  
0.583119570108755, 0.55981281028647, 0.886501872330591  
"9731", "TRAPPC9", 40.7431769037508, 0.176482207161366, 0.302642021961484,  
0.583138475012653, 0.559800084755694, 0.886501872330591  
"9732", "AC090559.2", 5.52438385044031, 0.423093869633542, 0.7257457043730  
44, 0.582978124547143, 0.559908026533288, 0.886501872330591  
"9733", "UBL3", 798.63385992497, -0.120902270255686, 0.207298404299409, -0.  
583228176137149, 0.559739705804341, 0.886501872330591  
"9734", "MT1A", 802.758569227203, -0.478774605574203, 0.821255120735958, -0.  
.582979141908005, 0.559907341653201, 0.886501872330591  
"9735", "ZNF155", 15.4571805019142, -0.238466984394916, 0.408812284793629,  
-0.583316581387215, 0.559680202212905, 0.886501872330591  
"9736", "AP000692.1", 3.34331880498657, 0.476742723768087, 0.8175951622253  
42, 0.583103650553021, 0.559823526387141, 0.886501872330591  
"9737", "GNB1", 695.024838269971, 0.0938239791994712, 0.161199350117424, 0.  
582036956917793, 0.560541787822925, 0.88652401424898  
"9738", "METTL5", 327.164300609663, -0.147462385362403, 0.253068226285534,  
-0.582698142421178, 0.560096523943066, 0.88652401424898  
"9739", "SP100", 581.067125359168, 0.0818718038935154, 0.140629034856971, 0.  
.582182790181164, 0.560443564211201, 0.88652401424898  
"9740", "CAVIN3", 1420.33705347192, -0.147620415858409, 0.253571139579303,  
-0.582165683773497, 0.560455085520889, 0.88652401424898  
"9741", "AC025031.4", 2.57772064460919, 0.542146115038264, 0.9314938914401  
6, 0.582017896220517, 0.560554626460253, 0.88652401424898  
"9742", "FIGNL2", 3.3413281023172, -0.473271861819145, 0.812522395785704, -  
0.582472390021316, 0.560248533694446, 0.88652401424898  
"9743", "PITPNM3", 2.73068613315608, -0.541295125866028, 0.929595788576424,  
-0.58229085428083, 0.560370784781594, 0.88652401424898  
"9744", "PDK2", 127.096308438656, 0.143720983656776, 0.24674285578313, 0.58  
2472725301911, 0.560248307919366, 0.88652401424898  
"9745", "CST7", 17.6495501665219, 0.261023610880272, 0.448144865786799, 0.5  
82453645702263, 0.56026115602847, 0.88652401424898  
"9746", "APOBEC3F", 30.7072738920666, 0.17474617492319, 0.299970970417346,  
0.582543619737831, 0.56020056920387, 0.88652401424898

"9747", "AC005052.2", 2.89039026847569, 0.508527129798391, 0.8731558697095  
14, 0.582401318526978, 0.560296393625194, 0.88652401424898  
"9748", "SUCLG1", 383.021124672987, -0.135941488575848, 0.233862285367339,  
-0.581288634729274, 0.561045939135535, 0.886627178804293  
"9749", "GAK", 101.493267115981, 0.14471921187168, 0.248927034952589, 0.581  
372014892812, 0.560989754315869, 0.886627178804293  
"9750", "RB1CC1", 639.06502973159, 0.161767861671395, 0.278242425872361, 0.  
581391788704442, 0.560976430346695, 0.886627178804293  
"9751", "MTFR1", 63.8608796843072, -0.145357542285026, 0.249980508378685, -  
0.581475504741475, 0.560920022590802, 0.886627178804293  
"9752", "EXOSC4", 68.2758978009722, -0.181565871329812, 0.312257865958729,  
-0.581461321310027, 0.560929579175114, 0.886627178804293  
"9753", "SENP1", 46.5328212644573, 0.152821419934903, 0.262923956595681, 0.  
581238096039719, 0.561079995409399, 0.886627178804293  
"9754", "MAPKAPK5", 80.7470919397123, -0.125248271693618, 0.21534250365035  
2, -0.58162355118236, 0.560820275814814, 0.886627178804293  
"9755", "TUBG2", 48.0246619502438, 0.14579140099701, 0.25062378253896, 0.58  
1714151466639, 0.560759237811728, 0.886627178804293  
"9756", "ELOA-  
AS1", 24.2228339911254, -0.223042669484123, 0.384190035697277, -0.58055297  
8369979, 0.561541771178953, 0.886761619845903  
"9757", "PDE12", 82.5806391328996, -0.144425715580291, 0.248898937510954, -  
0.580258465643047, 0.561740332000988, 0.886761619845903  
"9758", "WDR27", 75.7222648118391, 0.14472603488701, 0.249318013067744, 0.5  
80487679595318, 0.561585792760017, 0.886761619845903  
"9759", "CYP3A5", 41.6258801789973, -0.24296496227303, 0.418242812819215, -  
0.580918439782135, 0.561295423871322, 0.886761619845903  
"9760", "IL11RA", 392.061139781032, -0.172018283886348, 0.296318578630878,  
-0.580518051487518, 0.561565317149624, 0.886761619845903  
"9761", "PDCL", 187.939006668029, 0.101274126845019, 0.174487695969924, 0.5  
80408413797124, 0.561639232540361, 0.886761619845903  
"9762", "ACTR1A", 180.623393453741, -0.125197423514084, 0.215540614497787,  
-0.580853050854458, 0.561339496876398, 0.886761619845903  
"9763", "TNFRSF1A", 825.195800656226, -0.1404208470854, 0.241986759879172,  
-0.580283182251436, 0.561723666730295, 0.886761619845903  
"9764", "TSNAXIP1", 3.17539901668572, -0.490506905615871, 0.84513454916511  
9, -0.580389129873376, 0.561652233836593, 0.886761619845903  
"9765", "NUDT7", 56.379921624387, 0.185115646997777, 0.318919034207011, 0.5  
80447157875244, 0.561613111572414, 0.886761619845903  
"9766", "AL512329.2", 5.40091260576392, 0.444246550645938, 0.7660909766999  
08, 0.579887460050268, 0.561990512701749, 0.886813187115936  
"9767", "GABARAPL1", 618.659139914683, -0.144732617331724, 0.2495498099420  
72, -0.579974864999177, 0.56193156795701, 0.886813187115936  
"9768", "NLK", 15.0732569827661, 0.229769044382269, 0.396183469602202, 0.57  
9956161757518, 0.561944180925231, 0.886813187115936  
"9769", "COMMD7", 235.035858540488, -0.122389521803833, 0.211064170941788,  
-0.579868772884186, 0.562003115467764, 0.886813187115936  
"9770", "TRAF7", 165.947788452075, -0.0974123807379773, 0.16802882983056, -  
0.579736113357497, 0.562092585980699, 0.886863583714685  
"9771", "MTF1", 78.2169005190811, 0.141969958189146, 0.244941748752835, 0.5

79607024576298,0.56217965485612,0.886873360739332  
"9772","PRRX1",3757.72140506375,0.0889845712179434,0.153606937684276,0.579300470144405,0.562386448344273,0.886873360739332  
"9773","SDCBP",2866.38851706041,0.153967074096249,0.265734509434282,0.579401879056007,0.562318036516644,0.886873360739332  
"9774","TMOD1",13.4395570854141,-0.323822185131613,0.558797674730258,-0.579498089872919,0.56225313510996,0.886873360739332  
"9775","WDR20",94.5353677323577,-0.111852640417962,0.193081805244164,-0.579301816017917,0.562385540373425,0.886873360739332  
"9776","RNF166",64.0925548168718,-0.132252357410794,0.228342942135202,-0.579183031339273,0.562465679177747,0.88690757411262  
"9777","FGD5",142.760123990168,0.135088684770613,0.233518485705189,0.578492466507164,0.562931682108994,0.88712619951696  
"9778","AC012557.2",3.06648199409298,0.492489973987153,0.850995442505761,0.578722222691362,0.562776618704547,0.88712619951696  
"9779","MRPS30",138.684502199762,-0.12248221211607,0.211688988280172,-0.578595103652551,0.562862409325155,0.88712619951696  
"9780","ASCC3",115.687886409058,-0.103913318214947,0.179691356948203,-0.578287792912044,0.563069834528718,0.88712619951696  
"9781","SMC04",82.2438085638844,-0.175036020362187,0.302710087030366,-0.578229890121333,0.563108921241614,0.88712619951696  
"9782","ZBTB16",1114.51823987814,-0.239443612076159,0.413640572000702,-0.578868777107657,0.562677719288593,0.88712619951696  
"9783","ING4",197.79281267755,0.146072973275201,0.252629573553088,0.578210109057186,0.563122274555527,0.88712619951696  
"9784","ANO6",386.52346794484,0.11548890936959,0.199583261290133,0.578650276696822,0.562825173138647,0.88712619951696  
"9785","MORF4L2-AS1",2.75321514419634,0.553761721332613,0.957706255597613,0.578216669355536,0.563117845973858,0.88712619951696  
"9786","PLA2G5",125.909272481192,-0.442286275945555,0.765124348952905,-0.578058032724794,0.563224939603362,0.887167947842907  
"9787","AC093157.1",32.9155452877552,0.220920413663987,0.382321625611164,0.577839177448655,0.5633727022168,0.887167947842907  
"9788","RNASE4",1632.26813539909,-0.125227957552848,0.216721154901516,-0.577829873644567,0.56337898419943,0.887167947842907  
"9789","AC022819.1",5.61768349534752,0.398919308618652,0.690291104142352,0.577900115219197,0.563331557514749,0.887167947842907  
"9790","CPEB4",73.9865607083349,0.17293299957073,0.299397313044221,0.577603712646506,0.563531699808248,0.887216001343732  
"9791","SLC25A40",29.8344962221102,0.169267050591116,0.293088408855155,0.577528982644854,0.563582165757887,0.887216001343732  
"9792","RNF214",91.4077042892233,-0.122543306893079,0.212177689515893,-0.577550387944535,0.56356771031313,0.887216001343732  
"9793","KIAA1522",30.1080944730021,-0.294061701438476,0.509468449062713,-0.577193154903844,0.563808980619088,0.88733071865576  
"9794","PYCR2",110.195263184206,-0.147832593473226,0.256331090114941,-0.576725177608915,0.564125121354964,0.88733071865576  
"9795","MORN2",166.605530796363,-0.160844468260223,0.279092005650817,-0.576313419960375,0.564403353643836,0.88733071865576

"9796", "ATP6V1E2", 46.0333129806821, -0.171426130863833, 0.297267206747325, -0.576673534694811, 0.564160013808303, 0.88733071865576  
"9797", "FXR1", 509.368708733196, 0.0883662683563991, 0.153308390961605, 0.576395511048901, 0.564347877899921, 0.88733071865576  
"9798", "ZNF454", 8.85973029014557, 0.301628480829324, 0.523075722069101, 0.576644007938638, 0.564179963981388, 0.88733071865576  
"9799", "AL049775.1", 11.1441641677231, 0.295610519874451, 0.512845738286619, 0.576412160237628, 0.564336626985057, 0.88733071865576  
"9800", "IGHA2", 13.0168383787482, -0.462766189636064, 0.802795485034369, -0.576443438288959, 0.564315490710038, 0.88733071865576  
"9801", "DTWD1", 415.567839943073, 0.107966475643639, 0.187131695931142, 0.576954508462142, 0.563970186881076, 0.88733071865576  
"9802", "CCT6B", 16.1200079225196, 0.242220615660972, 0.419784798654424, 0.577011403074587, 0.563931752414132, 0.88733071865576  
"9803", "PPP5D1", 22.6860078141767, 0.189204374743138, 0.327871366265625, 0.577068918515603, 0.563892899836426, 0.88733071865576  
"9804", "SPIN2B", 71.9668940610153, -0.188056105984422, 0.325987153232321, -0.576881954149894, 0.564019201899042, 0.88733071865576  
"9805", "HNRNP2", 252.438942314558, -0.128332426423143, 0.222577287399536, -0.576574671757861, 0.564226813294208, 0.88733071865576  
"9806", "CYP27A1", 258.881705239539, 0.110731022119812, 0.19221452148298, 0.576080419239376, 0.564560825814545, 0.887400599570974  
"9807", "FGFBP3", 25.2602431553986, -0.179748214666876, 0.312047341315907, -0.576028668947716, 0.564595803814686, 0.887400599570974  
"9808", "FBXL12", 128.609580178016, -0.124125708653768, 0.215498968387257, -0.575992124615239, 0.564620504741622, 0.887400599570974  
"9809", "CCDC142", 28.0741082468874, 0.235230875543354, 0.408818575858087, 0.575391847226163, 0.565026316689406, 0.887405060801548  
"9810", "NUS1", 101.733609605343, 0.115034900421097, 0.199902853152731, 0.575454019824358, 0.564984278972779, 0.887405060801548  
"9811", "TMEM209", 45.4025787743098, -0.167942359349483, 0.291813200361676, -0.575513236348916, 0.564944241390173, 0.887405060801548  
"9812", "CAT", 516.952449913574, 0.141024619547195, 0.244903465158411, 0.5758375834167, 0.564724967476645, 0.887405060801548  
"9813", "MANSC1", 83.6558216500806, 0.140567755878048, 0.244297119166934, 0.575396698730592, 0.565023036312877, 0.887405060801548  
"9814", "COG6", 87.3745222375408, 0.142485024366492, 0.247566183620118, 0.575543162975482, 0.564924007864858, 0.887405060801548  
"9815", "RPL23", 8760.85903759881, -0.0983244240077746, 0.170838494595623, -0.575540215573251, 0.564926000601143, 0.887405060801548  
"9816", "TIRAP", 13.540148125196, 0.237951666803724, 0.413685898712152, 0.575198882883108, 0.565156798219985, 0.887429158048392  
"9817", "MPDU1", 100.933424497092, 0.181519740927635, 0.315544652928908, 0.575258491128769, 0.565116489874133, 0.887429158048392  
"9818", "DDOST", 679.419197320091, -0.142939994315094, 0.248775158486825, -0.574575030660323, 0.565578743082447, 0.887639617655866  
"9819", "CCDC50", 540.820342843179, 0.0937772079186843, 0.163190128457277, 0.574650003681045, 0.565528026790464, 0.887639617655866  
"9820", "ZNF581", 156.682021764686, -0.156545620672514, 0.272431783316534, -0.574623191048991, 0.565546164227733, 0.887639617655866

"9821", "BMP2", 6.54729603049602, 0.457840703432531, 0.796600209008731, 0.574743388533951, 0.565464858675835, 0.887639617655866  
"9822", "AL031663.3", 3.40731309103908, -0.492531768284046, 0.856879664847621, -0.574796892130277, 0.565428668881202, 0.887639617655866  
"9823", "ZNF843", 8.22963901746454, 0.313083015814941, 0.545127427738886, 0.574329963754651, 0.56574453642154, 0.887809429801286  
"9824", "CDK11A", 109.725854221396, -0.158623175210717, 0.277534806934995, -0.571543356894582, 0.567631379112219, 0.888135671298445  
"9825", "SLC6A9", 3.91288481709665, -0.42326449871874, 0.739405355477277, -0.572439049275655, 0.567024567316813, 0.888135671298445  
"9826", "POGK", 69.3547400214286, 0.154018829050832, 0.268395132910931, 0.573851050801074, 0.566068599291891, 0.888135671298445  
"9827", "BCS1L", 64.7674546175617, -0.136253800255006, 0.23829905959557, -0.571776491633032, 0.567473405552676, 0.888135671298445  
"9828", "AC007370.2", 4.14281400440061, 0.599803933731723, 1.05004040986972, 0.57121985791589, 0.567850618917201, 0.888135671298445  
"9829", "LINC01023", 18.5761040716222, -0.230606200900921, 0.403686384497651, -0.571250876315505, 0.56782959555331, 0.888135671298445  
"9830", "AC116366.1", 27.5234854254328, 0.320444139334183, 0.560633127805778, 0.571575462528136, 0.567609622883754, 0.888135671298445  
"9831", "PCDHGA2", 7.00650277975303, 0.359099918103922, 0.626270934504484, 0.573393875269093, 0.566378036345289, 0.888135671298445  
"9832", "AL451165.2", 44.7907784114235, 0.162485784440481, 0.284332603177462, 0.571463780884345, 0.567685305134581, 0.888135671298445  
"9833", "TMEM106B", 359.011134165938, 0.0962287298183617, 0.168145801786447, 0.572293383456441, 0.567123231519503, 0.888135671298445  
"9834", "PCOLCE-AS1", 3.1001731549342, 0.530784044421304, 0.926875305063237, 0.572659603208536, 0.566875194614726, 0.888135671298445  
"9835", "CTTNBP2", 10.8004718129544, -0.320976581850157, 0.559761401079469, -0.573416782992131, 0.566362529432423, 0.888135671298445  
"9836", "CHD7", 13.026408915375, -0.316703900440727, 0.554369034522237, -0.571287140367909, 0.567805017316132, 0.888135671298445  
"9837", "PPP6C", 160.720378875094, 0.116059556348755, 0.202959698173804, 0.571835479620037, 0.56743343826075, 0.888135671298445  
"9838", "SURF6", 86.3221998888526, 0.156318129105627, 0.273179243512398, 0.572218178422962, 0.56717417355722, 0.888135671298445  
"9839", "DDX50", 219.308440690167, -0.116984387333811, 0.203936551934059, -0.573631289851545, 0.566217333301954, 0.888135671298445  
"9840", "ABCC2", 182.799246192678, 0.414715604259802, 0.723855162548667, 0.572926222974778, 0.566694648481355, 0.888135671298445  
"9841", "UBQLNL", 3.12732543156798, 0.539651681000697, 0.944441743250445, 0.571397531777239, 0.567730201827464, 0.888135671298445  
"9842", "C2CD2L", 14.0517757565277, -0.233509083506727, 0.408201961340311, -0.572043021890465, 0.567292828777618, 0.888135671298445  
"9843", "SPPL2A", 644.414585706227, 0.0939631563903356, 0.163914499207006, 0.573244934675793, 0.566478863589646, 0.888135671298445  
"9844", "UBE2Q2", 248.601244180546, -0.0946443200091711, 0.165035862948045, -0.573477293471457, 0.566321569085255, 0.888135671298445  
"9845", "NUP88", 51.5123931837188, 0.157661361742147, 0.276010409279003, 0.



571215274648486,0.567853725353064,0.888135671298445  
"9846","RPAIN",195.101793608909,-0.129774040865759,0.22685355319093,-0.572060869403862,0.567280737901527,0.888135671298445  
"9847","AC005332.3",15.3277611828602,0.275625138940045,0.480556999422955,0.573553479131531,0.5662700000214,0.888135671298445  
"9848","NDUFAF8",404.111246339642,-0.158860990917052,0.277489203223528,-0.572494313550222,0.566987137176641,0.888135671298445  
"9849","VAPA",801.870422116139,-0.114432133240188,0.199728728387958,-0.572937774970021,0.566686826473505,0.888135671298445  
"9850","ATP8B3",5.51790366579126,-0.354892269625526,0.618732033984929,-0.573579918498563,0.566252104090853,0.888135671298445  
"9851","KIF16B",77.9027653977222,0.154784129217011,0.270706764557958,0.571777840386667,0.567472491690018,0.888135671298445  
"9852","PXMP4",84.6482401673578,-0.120787574447131,0.210735358457395,-0.573171846107408,0.56652834498211,0.888135671298445  
"9853","AL031651.2",2.97063393484317,-0.612671827875924,1.07017127602205,-0.572498852850264,0.566984062790344,0.888135671298445  
"9854","HELZ2",150.328176099905,-0.229512949657044,0.401504044402719,-0.571632970717566,0.567570653733282,0.888135671298445  
"9855","ASCC2",167.424275803361,-0.126804306689801,0.221820630016561,-0.571652450361959,0.56755745407428,0.888135671298445  
"9856","PWP2",4.45330397930285,1.78844729212153,3.12847667338485,0.571667133508311,0.567547504681542,0.888135671298445  
"9857","NUP155",45.6995316365915,-0.158775131638677,0.278023705953073,-0.571084868804232,0.5679421149173,0.888183798463039  
"9858","FM01",36.2321666715394,-0.544729877633135,0.954182233891554,-0.570886627611477,0.568076496141644,0.888213732429601  
"9859","ZNF530",9.06273075264787,-0.272895697300215,0.47798403700758,-0.570930567072239,0.568046709705445,0.888213732429601  
"9860","LINC02777",3.614203378354,-0.433739655011041,0.760109716226699,-0.570627694596763,0.568252041274093,0.888324000332839  
"9861","S1PR4",2.67520984341245,-0.502946634647545,0.881415225997055,-0.570612600977721,0.568262274880449,0.888324000332839  
"9862","DNM3",8.96583404399829,-0.342070480265754,0.599614134089647,-0.570484351215464,0.568349232902357,0.888369846399294  
"9863","AL139011.1",2.47872393136403,0.539795696117199,0.94663234538883,0.570227394771143,0.56852347789764,0.888411211915781  
"9864","LINC00504",3.74239942982755,0.574160881175832,1.00711245575144,0.570106027283151,0.568605787406627,0.888411211915781  
"9865","BRI3BP",38.2057138212333,0.179508071057817,0.314868230443167,0.570105376478169,0.568606228787615,0.888411211915781  
"9866","ULK3",45.2148204367854,-0.194317536875611,0.3407151796388,-0.570322511258853,0.568458975382791,0.888411211915781  
"9867","HNRNPU",1353.34681391872,0.10692423839966,0.187595953243379,0.569970921819089,0.568697420492351,0.888463640102321  
"9868","OSR1",155.392166212135,-0.198629865980738,0.348650320099131,-0.569710837851124,0.56887383808389,0.888469119965873  
"9869","AP000787.1",15.3882720397071,0.224592024720088,0.394201560754231,0.569739055041723,0.568854696813107,0.888469119965873  
"9870","SCYL2",75.7930317088056,-0.126566016916142,0.222137435871714,-

0.569764463245337,0.56883746129583,0.888469119965873  
"9871","MSRB1",79.1867032411323,-0.144835455732158,0.254264848250296,-  
0.569624376821382,0.568932491266902,0.888470707413564  
"9872","PHKB",218.771590274144,0.111080661732303,0.195061113482091,0.5  
69465947104321,0.569039973855764,0.888548541023765  
"9873","AL590560.3",6.03017148503919,0.376820927790182,0.6620624345824  
9,0.569162224145541,0.56924605404204,0.888692761400193  
"9874","EIPR1",50.7602313307928,-0.136936190858506,0.24104836423581,-0  
.568085957739773,0.569976602259688,0.888692761400193  
"9875","AC093635.1",2.71536435946504,-0.516018240420324,0.908824993934  
941,-0.567786145697995,0.570180188299645,0.888692761400193  
"9876","NME6",110.317997170072,0.11651781298478,0.205101444963885,0.56  
8098450039184,0.569968120171411,0.888692761400193  
"9877","BST1",231.021547389043,-0.185193304140689,0.325696678932755,-0  
.568606670315252,0.569623097098899,0.888692761400193  
"9878","FAT4",173.68078962998,0.130406959886803,0.229650624017421,0.56  
7849360064922,0.570137259979683,0.888692761400193  
"9879","CDK7",44.606623054894,0.165198485524717,0.290952617712016,0.56  
7784840101455,0.570181074935,0.888692761400193  
"9880","ATG10",85.6995563764007,-0.12231284964341,0.215502799123269,-0  
.567569656361849,0.570327215975021,0.888692761400193  
"9881","MRPS18B",294.423901625,-0.131418886576918,0.231625108398637,-0  
.56737755023838,0.570457699039838,0.888692761400193  
"9882","CENPQ",61.6538901706598,-0.145867853683544,0.256867894269593,-  
0.567871100038878,0.570122496910886,0.888692761400193  
"9883","PILRB",69.7622590800071,0.140098530660791,0.246508498033247,0.  
568331444062003,0.569809931675682,0.888692761400193  
"9884","AC105046.1",4.33343588957348,0.534774402282824,0.9423369602963  
33,0.567498065781751,0.570375840343191,0.888692761400193  
"9885","UPF2",223.322128805628,-0.115177271936987,0.202652616535715,-0  
.568348309071491,0.569798482192743,0.888692761400193  
"9886","AP006623.1",20.4519840716691,0.285827818393771,0.5039216085421  
,0.567206909861838,0.570573613984931,0.888692761400193  
"9887","OSBP",153.551879987831,0.117310221389412,0.206679696305592,0.5  
67594318582506,0.570310465836373,0.888692761400193  
"9888","RSRC2",775.837221612815,0.0997865932022447,0.17590540354568,0.  
567274178000631,0.570527917817358,0.888692761400193  
"9889","TSC22D1-  
AS1",5.82608911285587,0.3837455527768,0.674907260404498,0.568590049760  
032,0.56963437896645,0.888692761400193  
"9890","EFCAB11",48.062540017799,0.165637171722986,0.29122905795096,0.  
568752214797457,0.569524307507195,0.888692761400193  
"9891","TMEM106A",32.3301040165148,-0.272818367007623,0.48050268536909  
3,-0.567776987131843,0.570186407929067,0.888692761400193  
"9892","C17orf67",19.3030661636734,-0.217448462737067,0.38261134798296  
3,-0.568327269652101,0.569812765656934,0.888692761400193  
"9893","TNFAIP8L1",3.18053458427549,-0.489250253606204,0.8625260396394  
72,-0.567229545685028,0.570558236965708,0.888692761400193  
"9894","GRAMD1A",123.919490561048,-0.106913416934532,0.187996513758931  
, -0.568698933809099,0.569560471495814,0.888692761400193

"9895", "AL121894.1", 4.10602084738596, -0.433411264446797, 0.763753914537382, -0.567475015443058, 0.570391496568538, 0.888692761400193  
"9896", "PDE9A", 19.5641568512871, 0.224364927078514, 0.394681758239054, 0.568470476263104, 0.569715547409264, 0.888692761400193  
"9897", "CFP", 6.34535639171296, -0.380841872909857, 0.671225789514362, -0.567382658502141, 0.570454229201066, 0.888692761400193  
"9898", "RNF207", 15.4793997927613, 0.261791404390076, 0.461639527583069, 0.567090530052082, 0.570652676500532, 0.888726107118175  
"9899", "C11orf58", 1202.59517099571, -0.09483790662431, 0.167269432031564, -0.566976915461839, 0.570729865500459, 0.888756528607898  
"9900", "UCN", 3.71766975540664, 0.448260372807441, 0.790976777421402, 0.566717488557348, 0.570906137059482, 0.888874890957066  
"9901", "TRIM66", 24.844006815577, 0.235509934520251, 0.415709243650592, 0.566525614037583, 0.571036525796161, 0.888874890957066  
"9902", "PMP22", 4276.30528419978, 0.0946338342493411, 0.167010443057861, 0.566634232666248, 0.570962712035746, 0.888874890957066  
"9903", "PCED1A", 90.5820929510317, -0.113346392079983, 0.200071629909361, -0.566529058274442, 0.571034185132758, 0.888874890957066  
"9904", "TTLL5", 46.1075957021247, -0.180186628009222, 0.318169641537115, -0.566322503739576, 0.571174565273285, 0.888999992294799  
"9905", "RNASEH2C", 592.692999374797, 0.135852712455947, 0.239946265778406, 0.566179732013039, 0.571271606462494, 0.889061263363891  
"9906", "ZMIZ1-  
AS1", 7.51378531111465, -0.308042903481892, 0.544296106587984, -0.565947284489896, 0.571429616599744, 0.889127641050273  
"9907", "KCTD17", 61.1988598551235, -0.135801589463921, 0.239952223030966, -0.565952620686476, 0.571425988996666, 0.889127641050273  
"9908", "BTF3L4", 335.826309606287, -0.129975131274647, 0.229698729223101, -0.565850458617059, 0.571495441758727, 0.889140314363219  
"9909", "ETV5", 43.6460560301402, 0.187869514735499, 0.332204394580749, 0.565523869642349, 0.57171749342432, 0.889313462459251  
"9910", "CNTD1", 5.5882480231202, 0.429813646903783, 0.760036554498089, 0.565517071988231, 0.571722115664689, 0.889313462459251  
"9911", "XRCC5", 808.698305501023, -0.102901160967744, 0.182083261290171, -0.565132457748318, 0.571983672984577, 0.889451056093742  
"9912", "HOPX", 9.56556341909289, 0.380424716976542, 0.673121991154869, 0.56516459419763, 0.571961816381032, 0.889451056093742  
"9913", "CIPC", 21.4939908231538, 0.191580571029739, 0.338982263065387, 0.565163997954621, 0.571962221893501, 0.889451056093742  
"9914", "LIX1L-  
AS1", 4.36831655927097, -0.404370963745665, 0.717376511326515, -0.563680239541067, 0.572971767927148, 0.889641398327657  
"9915", "DUSP12", 87.7244224982385, -0.168839655817217, 0.299295942393277, -0.564122769146535, 0.572670583269949, 0.889641398327657  
"9916", "MARC1", 8.41145438655415, 0.387212045226761, 0.685728683762757, 0.564672376109508, 0.572296626673361, 0.889641398327657  
"9917", "WDR54", 59.3056915016593, -0.138096477569601, 0.244672214428309, -0.564414222073688, 0.572472262120185, 0.889641398327657  
"9918", "RPL37A", 14406.0238961658, -0.151864869299341, 0.26934673291849, -0.563826661841481, 0.572872104918121, 0.889641398327657

"9919", "EXOG", 79.1830421448193, -0.132085250887915, 0.234302702241124, -0.563737633516428, 0.572932701474754, 0.889641398327657  
"9920", "SLC10A7", 44.8785594456211, 0.15225852125921, 0.269776903194643, 0.564386793147209, 0.572490924931579, 0.889641398327657  
"9921", "LUCAT1", 14.306621684873, -0.448439229680399, 0.795511882551002, -0.563711541608114, 0.572950461340568, 0.889641398327657  
"9922", "TBCC", 87.1737358456375, -0.169875734880514, 0.300989914906735, -0.564390122284168, 0.572488659750775, 0.889641398327657  
"9923", "PRRT4", 2.43248988733129, 0.54602319320258, 0.96679124127369, 0.564778795971741, 0.572224231228011, 0.889641398327657  
"9924", "BMP4", 247.482562550404, 0.159994038251303, 0.283831857749408, 0.563693024172644, 0.572963065681355, 0.889641398327657  
"9925", "PARP6", 60.3891714403848, -0.149277017832956, 0.264596561917091, -0.564168395656367, 0.572639534244177, 0.889641398327657  
"9926", "CIITA", 9.85776891939472, -0.367444731967073, 0.65137380748959, -0.5641073186274, 0.572681097592285, 0.889641398327657  
"9927", "ZNF570", 51.0648072054117, 0.13799665240469, 0.244651700510296, 0.564053518192826, 0.572717710352989, 0.889641398327657  
"9928", "YIPF6", 266.718518673244, 0.107417862857021, 0.190280272757413, 0.564524431778416, 0.572397277667538, 0.889641398327657  
"9929", "LDLRAD2", 12.4452651320136, 0.286217016854133, 0.507920498470529, 0.563507512919839, 0.573089345667914, 0.889734340162242  
"9930", "TRIM24", 55.5709661076791, -0.15148995416951, 0.268942387790654, -0.563280319677352, 0.573244017125254, 0.889884846322838  
"9931", "SRSF10", 624.293793320784, -0.088599776805203, 0.157517549653053, -0.562475590817354, 0.573792029700094, 0.889916081680517  
"9932", "EVI5", 258.358765210671, 0.0947180753936991, 0.168462153021738, 0.562251364444313, 0.573944769900406, 0.889916081680517  
"9933", "PARP1", 203.450158557009, 0.107356736909342, 0.190774781872686, 0.562740713712293, 0.573611456154098, 0.889916081680517  
"9934", "ODC1", 86.2062994910871, -0.182896084638498, 0.32501249978501, -0.562735540200701, 0.573614979542815, 0.889916081680517  
"9935", "FBXL17", 103.505084911106, -0.118633976882248, 0.210900723018309, -0.562511001311027, 0.573767910275854, 0.889916081680517  
"9936", "GNPDA1", 150.411765244859, 0.0935217121848974, 0.166306802012189, 0.562344480522468, 0.573881338054458, 0.889916081680517  
"9937", "CYTH3", 136.599480962143, 0.145957861679323, 0.259893309088953, 0.561606846251538, 0.574383914843687, 0.889916081680517  
"9938", "PDIA4", 303.823463222722, 0.136810422326843, 0.243159861392349, 0.562635714395698, 0.573682967310808, 0.889916081680517  
"9939", "LINC00865", 3.38375658449161, 0.499726471347125, 0.888797389725704, 0.562250156361675, 0.573945592883348, 0.889916081680517  
"9940", "BTAf1", 77.9125453627468, 0.188427168357451, 0.334665608487933, 0.563031167764123, 0.573413660638342, 0.889916081680517  
"9941", "USP35", 10.2650600679419, -0.269375274264324, 0.479588984805089, -0.561679443855037, 0.574334442240389, 0.889916081680517  
"9942", "UBASH3B", 3.05093187206591, 0.519541736964627, 0.924143447987128, 0.562187329354808, 0.573988393337627, 0.889916081680517  
"9943", "ATP6V1D", 244.895423929326, -0.124784258516906, 0.222171641664698, -0.561657003485759, 0.574349734313355, 0.889916081680517

"9944", "MESP1", 19.7493918711661, 0.255934405651805, 0.454843263064084, 0.562687031852872, 0.573648016358119, 0.889916081680517  
"9945", "NFATC2IP", 170.197575930328, 0.126898057525279, 0.225975892292264, 0.561555731622721, 0.574418748797999, 0.889916081680517  
"9946", "EPN2", 293.630180525606, 0.147180454996402, 0.261965268063047, 0.561831940870038, 0.574230527689034, 0.889916081680517  
"9947", "TUBD1", 47.2763792764398, -0.170115970540584, 0.302929882509703, -0.561568799786977, 0.574409842918992, 0.889916081680517  
"9948", "STAU1", 467.113140464541, -0.0747957729655774, 0.132999054767819, -0.562378229650961, 0.573858348542846, 0.889916081680517  
"9949", "URB1", 46.4181331144622, 0.164801587130792, 0.293356030103499, 0.561780124555982, 0.574265835375281, 0.889916081680517  
"9950", "TTC38", 38.5440012180162, -0.158321223336425, 0.281822800961409, -0.56177577824196, 0.574268797004559, 0.889916081680517  
"9951", "TCP11L1", 35.5506755346673, 0.173762144855262, 0.309661737517584, 0.561135341577016, 0.574705277065769, 0.890270510096355  
"9952", "PURA", 621.318677079365, -0.108290408274611, 0.19310172617803, -0.560794615449336, 0.574937557822987, 0.890306816783361  
"9953", "ACTB", 11430.2616127701, -0.166243332413013, 0.296459652562358, -0.560762083393606, 0.574959737987568, 0.890306816783361  
"9954", "ITGB8", 39.2839919166004, 0.227072760265858, 0.404759572998752, 0.561006521929893, 0.574793091131825, 0.890306816783361  
"9955", "FAM122A", 88.8404896614645, 0.124939417863426, 0.222769492024037, 0.560846176593808, 0.574902404566349, 0.890306816783361  
"9956", "AL445223.1", 2.47806712583973, -0.494590280956077, 0.882383963818026, -0.560515944573621, 0.575127567100917, 0.890477244562137  
"9957", "SDE2", 87.6568806105505, -0.114244299331636, 0.20409340901417, -0.55976476596412, 0.575639899419798, 0.890695836047845  
"9958", "ALAS1", 58.4774224743371, 0.145619000707805, 0.260061461387638, 0.559940715286337, 0.57551987597314, 0.890695836047845  
"9959", "HIST1H4C", 843.556245070579, -0.203027377162362, 0.36259583425399, -0.559927494975426, 0.575528893768603, 0.890695836047845  
"9960", "AC015987.1", 3.06121988106608, -0.513354907966795, 0.916991555520285, -0.559825120391132, 0.575598727446771, 0.890695836047845  
"9961", "AC104211.1", 5.8087408608438, 0.375992322187538, 0.67170366398596, 0.559759224709837, 0.575643679566358, 0.890695836047845  
"9962", "MRPS2", 143.087703730818, -0.138501042955507, 0.247336707957401, -0.559969622379552, 0.575500158193338, 0.890695836047845  
"9963", "HAUS1", 142.877747723773, -0.128066854102842, 0.228806877561539, -0.559715929292367, 0.575673215345097, 0.890695836047845  
"9964", "SCMH1", 60.8959074109839, 0.142045708952759, 0.254219932897478, 0.558751264441733, 0.576331487364172, 0.890992662259179  
"9965", "OLFML2B", 415.215773183943, -0.126082797326591, 0.225566830264933, -0.558959831011077, 0.576189134753665, 0.890992662259179  
"9966", "SESTD1", 1125.31685320297, 0.130665441810179, 0.233883645099423, 0.55867712235558, 0.576382095442161, 0.890992662259179  
"9967", "ANKH", 168.929032055588, -0.143297135758853, 0.256249415022586, -0.55920961125403, 0.576018674477371, 0.890992662259179  
"9968", "EXTL3", 27.3565478383905, 0.202606673064597, 0.362598435867544, 0.558763229576116, 0.576323320371317, 0.890992662259179

"9969", "SOX5", 118.1471109363, 0.171614596890543, 0.307275977194502, 0.558503136032378, 0.576500863663513, 0.890992662259179  
"9970", "PARP2", 66.5775919282514, -0.184913296934329, 0.33104156395259, -0.558580302504888, 0.576448186117658, 0.890992662259179  
"9971", "YWHA", 1259.82763171391, -0.0941907319976553, 0.168599598181201, -0.558665222300379, 0.576390218404818, 0.890992662259179  
"9972", "ANKRD13B", 71.4284685850204, -0.156969288765336, 0.28076350627536, -0.559080098577298, 0.576107056265224, 0.890992662259179  
"9973", "RHOT1", 100.975048162963, -0.110537952728652, 0.197795331326407, -0.558850160857636, 0.576263985681421, 0.890992662259179  
"9974", "CCDC97", 95.2270615076852, -0.13787340946029, 0.246585466341613, -0.559130314960591, 0.576072786939337, 0.890992662259179  
"9975", "WASF3", 128.156230975337, -0.126796157087489, 0.227116921177093, -0.558285822255492, 0.576649224699331, 0.891132611402526  
"9976", "PPP2R5B", 28.6637904813889, -0.173239164815944, 0.310388118252519, -0.558137230868496, 0.576750679030919, 0.891200051850604  
"9977", "METAP2", 488.580975774852, -0.112342351474812, 0.201365060212785, -0.557903895323738, 0.576910011448314, 0.891356903525685  
"9978", "GLRB", 2.87535797693127, -0.530827840647432, 0.951837883913263, -0.557687238151371, 0.577057973665559, 0.891496157952956  
"9979", "EBPL", 312.589252802711, -0.183147817233587, 0.328574662529076, -0.557400914068898, 0.577253541103566, 0.891530241069178  
"9980", "IFI27L1", 170.796926104105, 0.168200197048311, 0.30167975493995, 0.557545524000416, 0.577154764532483, 0.891530241069178  
"9981", "ZNF267", 68.2931519034717, -0.164408982002512, 0.294912116551482, -0.557484663312611, 0.577196334773589, 0.891530241069178  
"9982", "CANX", 887.072228390475, -0.0750641171834509, 0.134751221083303, -0.557057046162471, 0.577488453853071, 0.8915454043293  
"9983", "AC016405.3", 5.81605872125162, -0.396191834640024, 0.711128096782315, -0.5571314597647, 0.577437614516614, 0.8915454043293  
"9984", "KHSRP", 310.622182231575, 0.107605310868419, 0.193170661357376, 0.557047898020828, 0.577494704004415, 0.8915454043293  
"9985", "SAT1", 3157.83957658968, -0.159901463658469, 0.287026224592437, -0.557097052318204, 0.577461121405189, 0.8915454043293  
"9986", "TULP4", 94.8909714054444, 0.133146122943238, 0.239139487799937, 0.556771799455503, 0.577683353784006, 0.891747336128626  
"9987", "MTSS1", 258.132350346228, 0.19674475201807, 0.353508512894538, 0.55648837840194, 0.577835717863823, 0.891893220273439  
"9988", "HPCAL1", 69.5063273204542, -0.140778415271356, 0.25311519501988, -0.556183184736498, 0.578085633187224, 0.89199704971215  
"9989", "TTC21B", 75.7187676665176, 0.126020267866709, 0.22656332796674, 0.556225356493747, 0.578056807186308, 0.89199704971215  
"9990", "SLC9B1", 11.7094917098014, 0.241400716971672, 0.434080119474464, 0.556120186439161, 0.578128696180267, 0.89199704971215  
"9991", "AC027796.1", 6.76493955235497, 0.356513213616205, 0.64108194069864, 0.556111771340312, 0.578134448503022, 0.89199704971215  
"9992", "SLC16A11", 3.42935267824464, 0.444137466774925, 0.798784472974025, 0.55601665004994, 0.578199472589464, 0.892008093471436  
"9993", "FOX D2", 3.73761682729714, -0.471121216799483, 0.847549525109441, -0.55586275827203, 0.578304678952529, 0.892081119388895

"9994", "NKX3-2", 2.64382096073619, -0.597039349936738, 1.07440950190422, -0.555690683001761, 0.578422326911161, 0.89217332092611  
"9995", "DESI1", 96.7076705815616, 0.124106961520903, 0.22338815328621, 0.55566442065949, 0.578507277502427, 0.892215075807895  
"9996", "AC012146.1", 32.4179009849933, -0.19571942261925, 0.352472442064085, -0.55527581524704, 0.578706018481617, 0.892343030398532  
"9997", "MFSD11", 131.538031234772, -0.113138958330601, 0.203746175216862, -0.5552936550106, 0.578693818091201, 0.892343030398532  
"9998", "TF", 6.2167212748806, 0.382922175891794, 0.68987937465585, 0.555056709852816, 0.578855871767697, 0.892374405466012  
"9999", "CREBRF", 641.452061372225, 0.126037835699488, 0.227095208335478, 0.554999978305564, 0.578894675283687, 0.892374405466012  
"10000", "SLC25A21", 5.60725209258718, -0.355840626693485, 0.641219746100073, -0.554943338625679, 0.578933417182615, 0.892374405466012  
"10001", "SNU13", 747.847821951104, -0.128291823557548, 0.231194967882502, -0.554907508292952, 0.578957925985442, 0.892374405466012  
"10002", "GPATCH2L", 182.920545949468, 0.125609338949764, 0.226472789984872, 0.554633247367837, 0.579145543143607, 0.892447716436133  
"10003", "MHENCR", 14.3609909227843, 0.251035851282018, 0.452656063134611, 0.554584090940069, 0.579179173222645, 0.892447716436133  
"10004", "TRMT2B", 20.8742130291811, -0.212023953808218, 0.382281210300556, -0.554628237264188, 0.579148970734395, 0.892447716436133  
"10005", "AL354733.3", 10.2034637266607, 0.408417720589055, 0.736796474314816, 0.554315519721865, 0.57936293081854, 0.892478898894383  
"10006", "CEP126", 546.795861562401, 0.119060742430657, 0.214827309616713, 0.554216047499177, 0.579430997089522, 0.892478898894383  
"10007", "TJP1", 240.874375409635, -0.134501141431795, 0.242668631726441, -0.554258457201085, 0.579401976767731, 0.892478898894383  
"10008", "TRIM25", 206.695851336097, 0.207293380158362, 0.373952448432565, 0.554330854169399, 0.579352438186294, 0.892478898894383  
"10009", "LRRC47", 118.266577827144, -0.10255222262179, 0.185481170878648, -0.55289829224167, 0.580333056905326, 0.892682169240692  
"10010", "TAF5L", 63.011390532823, -0.150055733334229, 0.271649879498798, -0.552386526403347, 0.580683559811127, 0.892682169240692  
"10011", "ER01B", 58.7170066203439, 0.182480420231472, 0.330022501785757, 0.552933267410759, 0.580309106408388, 0.892682169240692  
"10012", "CENP0", 7.71865250704079, 0.303295059658637, 0.548970434794506, 0.552479770194125, 0.580619690759121, 0.892682169240692  
"10013", "SEMA4F", 15.746995847039, -0.233527489518614, 0.42293250017128, -0.552162554128707, 0.580836987186775, 0.892682169240692  
"10014", "KYNUN", 3.07832264131597, -0.653684570202901, 1.1830818883579, -0.552526901675594, 0.580587408434558, 0.892682169240692  
"10015", "NDNF", 56.6836466155968, -0.19952044756413, 0.360872716137426, -0.552883159745858, 0.580343419566169, 0.892682169240692  
"10016", "PTGER4", 235.409742986189, 0.170624070591412, 0.308249988143627, 0.553524986712768, 0.579903975690948, 0.892682169240692  
"10017", "SNX2", 635.837279806993, 0.107950611429789, 0.195459643650742, 0.552291047980632, 0.580748962924405, 0.892682169240692  
"10018", "AC244517.1", 5.04173773930409, 0.379444882195207, 0.686037315984104, 0.553096563925101, 0.580197289414389, 0.892682169240692

"10019", "SPACA9", 35.4044003188942, -0.165268601988268, 0.299270703835404, -0.552237823048541, 0.58078542371959, 0.892682169240692  
"10020", "BRD30S", 60.8131715694711, -0.122731867953714, 0.221930337050704, -0.553019788032284, 0.580249860310958, 0.892682169240692  
"10021", "GOT1", 47.8168400059522, -0.177549158013886, 0.320771609924233, -0.553506459177679, 0.579916658872496, 0.892682169240692  
"10022", "ECHS1", 517.975877171158, -0.145599430064112, 0.263243310826224, -0.553098308964162, 0.580196094556568, 0.892682169240692  
"10023", "TMEM132A", 19.9748508289331, -0.266643815019365, 0.481759297503948, -0.553479333768707, 0.579935228036267, 0.892682169240692  
"10024", "TRPT1", 93.199104279878, -0.129006613764319, 0.233083854963269, -0.55347726158317, 0.579936646597866, 0.892682169240692  
"10025", "LINC02356", 4.81366671821267, 0.433107269595014, 0.783711063332469, 0.552636411375093, 0.580512403903285, 0.892682169240692  
"10026", "PDIA3", 1391.3188050865, -0.129640459938652, 0.234212979348372, -0.553515267596775, 0.579910628978152, 0.892682169240692  
"10027", "EMC6", 189.930099572635, -0.155806871976066, 0.281816439552609, -0.552866512058037, 0.580354819923417, 0.892682169240692  
"10028", "SMARCD2", 281.503918540289, 0.110235867127448, 0.199604253018302, 0.552272135791317, 0.580761918261324, 0.892682169240692  
"10029", "B3GNTL1", 11.3211678965337, 0.239064802972909, 0.432626781968885, 0.552589004973119, 0.580544872570123, 0.892682169240692  
"10030", "CCDC159", 22.270404208032, -0.184144259921294, 0.332868783576332, -0.553203751769253, 0.580123898221058, 0.892682169240692  
"10031", "AC006480.2", 6.89041474495185, 0.320340720954609, 0.58026783886442, 0.552056652978585, 0.580909539092945, 0.892704670034667  
"10032", "ACAT1", 380.942156442458, 0.109270846393576, 0.197972094084425, 0.551950752952979, 0.580982094470409, 0.892727171676771  
"10033", "GLT8D1", 601.207469906186, -0.104667098471638, 0.189726217906778, -0.551674405500807, 0.581171448614979, 0.892770912526196  
"10034", "KIAA1549L", 9.4119853008896, -0.396499638317085, 0.71856415672478, -0.551794345162348, 0.581089262034657, 0.892770912526196  
"10035", "ZNF74", 19.9729612884632, 0.199205925792119, 0.36110557277024, 0.551655639828267, 0.581184307959804, 0.892770912526196  
"10036", "AL669970.3", 13.5505536940362, -0.264912447981438, 0.480501047420379, -0.551325432907272, 0.581410606981507, 0.892851614526791  
"10037", "ADK", 327.807575100798, 0.0946911309811609, 0.171700680539134, 0.55148954962691, 0.581298128557611, 0.892851614526791  
"10038", "RALY-AS1", 11.8939506294371, -0.28290024671009, 0.513109785499703, -0.551344477740921, 0.581397553963183, 0.892851614526791  
"10039", "PDIA5", 75.6992689481213, 0.179074896234133, 0.325171729026137, 0.550708687899923, 0.581833388016043, 0.892861548687703  
"10040", "LINC00887", 3.85246115129032, -0.442800814152625, 0.80401344578438, -0.550738070954319, 0.581813242562061, 0.892861548687703  
"10041", "INMT", 188.227291259304, 0.23024276349, 0.417900833684479, 0.550950715891218, 0.581667459785062, 0.892861548687703  
"10042", "FUBP3", 133.501262446555, 0.106536267695295, 0.193477150444498, 0.550640049486653, 0.58188044879122, 0.892861548687703  
"10043", "SLC43A3", 419.748285137699, 0.119964012348916, 0.217738414632148



,0.550954743340012,0.581664698855794,0.892861548687703  
"10044","MAFTRR",5.68590528850745,0.378034907950905,0.68627471286115,0  
.550850702883746,0.581736023475692,0.892861548687703  
"10045","SEPTIN9",163.48834471256,-0.102831830928251,0.186669660545231  
, -0.550875973245444,0.581718699079834,0.892861548687703  
"10046","CC2D1A",57.9500396746047,-0.14352340019173,0.260458496935606,  
-0.551041343939007,0.581605333195039,0.892861548687703  
"10047","NCAPG2",26.8032952079881,-0.19474916928197,0.353818162750909,  
-0.550421628352288,0.582030217408539,0.892951094469404  
"10048","AMN1",25.1271570501603,0.19233302729141,0.349569573500957,0.5  
50199565039902,0.582182501881088,0.892951094469404  
"10049","SLC7A1",49.523173260257,-0.211882639084629,0.385066231483101,  
-0.550249857715523,0.582148011016881,0.892951094469404  
"10050","PPP2R5C",267.113625916888,-0.102108627483801,0.18560730907962  
7,-0.550132578238046,0.58222844310814,0.892951094469404  
"10051","CPT1C",7.87014897516896,-0.333045637523169,0.605182572100267,  
-0.550322585079316,0.582098136065943,0.892951094469404  
"10052","AC093425.1",84.765751599444,0.283655485206839,0.5158987313531  
67,0.549827840170938,0.582437461477685,0.892969845994722  
"10053","AC015982.2",6.69820084290487,0.345665807849515,0.628782886832  
467,0.549737938306222,0.582499131423961,0.892969845994722  
"10054","ZEB2-  
AS1",6.26077903787324,0.343473040531144,0.624861187956419,0.5496789481  
42799,0.582539598538976,0.892969845994722  
"10055","KLHL7",97.9070255603914,0.11052558273654,0.201183991366233,0.  
549375633647413,0.582747692295102,0.892969845994722  
"10056","TUSC3",162.426305776009,-0.166536354815159,0.303149026266058,  
-0.549354741021003,0.582762027292047,0.892969845994722  
"10057","IFIT1",375.641394799972,0.163981741362397,0.29841373564603,0.  
549511372214139,0.58265456239465,0.892969845994722  
"10058","AL049840.5",23.2085412504139,0.176664464476346,0.321490139598  
632,0.549517520807652,0.582650344024039,0.892969845994722  
"10059","TLE5",1391.10676410226,-0.107109075206744,0.1947962289507,-0.  
549851892840553,0.582420962594365,0.892969845994722  
"10060","EWSR1",324.470123649701,0.115827872650378,0.210592871580623,0  
.550008515392861,0.58231353298706,0.892969845994722  
"10061","DNALI1",44.7433044201937,-0.171807126190989,0.312977756750925  
, -0.548943567027089,0.583044178383717,0.893142113694126  
"10062","GMDS",45.529045603232,-0.191600793242454,0.34894650708542,-0.  
549083568260368,0.582948101193824,0.893142113694126  
"10063","MRPL38",194.638657144243,-0.121210008902733,0.220817503645123  
, -0.548914859111578,0.583063880378593,0.893142113694126  
"10064","EID2B",39.1442842242972,-0.180144849603759,0.328220470824436,  
-0.548853181373072,0.58310621032875,0.893142113694126  
"10065","LAS1L",74.3010227473137,-0.146149856389495,0.266484162682419,  
-0.548437306436361,0.58339166619202,0.893490564764032  
"10066","C1orf216",81.4043350142629,-0.147232250822619,0.2686775659324  
67,-0.547988628345794,0.583699711105639,0.893561420046755  
"10067","OSBPL11",121.546448020487,0.126777303404191,0.231403144879916  
,0.547863355400723,0.583785732162885,0.893561420046755

"10068", "ADH1C", 268.005995723234, 0.186313172700778, 0.340044296859598, 0.54790853550973, 0.583754707698516, 0.893561420046755  
"10069", "AP1S1", 209.868889937781, -0.156374543481242, 0.285414231087887, -0.547886287537953, 0.583769984931943, 0.893561420046755  
"10070", "TMP0", 133.74391349768, 0.136449306457557, 0.248921801212015, 0.548161333371273, 0.583581129587795, 0.893561420046755  
"10071", "PPP6R1", 72.8406394583667, 0.121981194762887, 0.222511245100374, 0.548202382795807, 0.583552946169827, 0.893561420046755  
"10072", "MTHFR", 115.986222012666, -0.110476808374387, 0.201715093028435, -0.547687367939358, 0.58390658728294, 0.893576944030192  
"10073", "LINC01309", 3.89149092071366, -0.504339328568636, 0.92086537260829, -0.547679762504402, 0.583911810393521, 0.893576944030192  
"10074", "C17orf113", 4.9911068930123, 0.385216848430733, 0.703538764340375, 0.547541753142636, 0.584006593519508, 0.893633277655669  
"10075", "ICMT", 146.288152770904, 0.132946344101736, 0.242899227969446, 0.54733127483822, 0.584151161212076, 0.893699865820509  
"10076", "TMEM107", 110.047767799388, 0.117983842048785, 0.215570576488921, 0.547309581717655, 0.584166062147742, 0.893699865820509  
"10077", "MRPL46", 108.571585676743, -0.160798571320453, 0.294022414598439, -0.546892220921535, 0.584452780393192, 0.894045072519161  
"10078", "ZNF266", 28.8712514523832, 0.196687238139737, 0.359697914492941, 0.546812283904962, 0.584507702941817, 0.894045072519161  
"10079", "YTHDF2", 347.283709806288, -0.109669994827919, 0.200836377014601, -0.546066387265819, 0.585020303905815, 0.894052395630858  
"10080", "AL603839.3", 2.57354218377802, -0.573814354281055, 1.05388247327238, -0.5444766080029, 0.586113541155558, 0.894052395630858  
"10081", "KLHL20", 152.999418152233, 0.0949777575706873, 0.174409730068953, 0.544566851477481, 0.586051458417462, 0.894052395630858  
"10082", "AL078645.1", 2.39406873041794, -0.575586158236741, 1.05408615141663, -0.546052291326649, 0.585029993039319, 0.894052395630858  
"10083", "GEN1", 17.4690798719378, -0.273556938903296, 0.50140926102846, -0.545576159367685, 0.585357315923444, 0.894052395630858  
"10084", "PPP1R1C", 12.395712186357, 0.374591316523113, 0.685788378054628, 0.54621998346737, 0.584914731234003, 0.894052395630858  
"10085", "AC096992.2", 2.65067268642684, 0.497047598668117, 0.910332929649965, 0.546006392253918, 0.58506154322711, 0.894052395630858  
"10086", "CPA3", 7.73784937942739, 0.487447367321128, 0.893299256019991, 0.545670853340797, 0.585292210588358, 0.894052395630858  
"10087", "ARHGAP10", 357.592035811592, 0.0810871658723483, 0.148533185530995, 0.545919523522422, 0.585121257377501, 0.894052395630858  
"10088", "AC107214.1", 4.00702181263039, 0.411255467826986, 0.754597497245665, 0.544999777136948, 0.585753670889673, 0.894052395630858  
"10089", "MAN1A1", 637.408677865296, -0.108708613829511, 0.199077681449648, -0.546061281394851, 0.585023813522552, 0.894052395630858  
"10090", "IL20RA", 7.91473429997284, -0.301189276754684, 0.553720330132177, -0.543937544577401, 0.58648445180793, 0.894052395630858  
"10091", "AC002456.1", 9.05912526219941, -0.299345159859979, 0.548047553121136, -0.546202894539362, 0.584926476684199, 0.894052395630858  
"10092", "CCDC25", 342.488704327811, -0.105237849071168, 0.193054897336189, -0.545118774624531, 0.585671830881626, 0.894052395630858

"10093", "PLEKHF2", 58.7006631044579, -0.13465899775837, 0.247380237936235, -0.544340157814381, 0.586207417462474, 0.894052395630858  
"10094", "TLR4", 149.062766652796, 0.21489764704344, 0.394594935173257, 0.544603156016394, 0.586026483675153, 0.894052395630858  
"10095", "ZNF485", 10.1659497352284, -0.245331264140876, 0.449997074832023, -0.545184130880084, 0.585626884657608, 0.894052395630858  
"10096", "WASHC2A", 157.216192811874, 0.104926919507623, 0.192575052436569, 0.544862474032998, 0.585848107101605, 0.894052395630858  
"10097", "TALD01", 635.811434001477, -0.142381987691509, 0.261649680380651, -0.544170310028164, 0.586324280710097, 0.894052395630858  
"10098", "AL109628.2", 6.22197589979886, 0.329570927380644, 0.605859050474544, 0.543972937472017, 0.586460095860237, 0.894052395630858  
"10099", "C14orf28", 67.9412599099591, 0.125623639765441, 0.230237088062342, 0.545627295856981, 0.585322157425781, 0.894052395630858  
"10100", "TMEM251", 101.186586500496, -0.150966440081055, 0.277044227605733, -0.54491819369685, 0.585809782615133, 0.894052395630858  
"10101", "ZNF839", 22.9934966304482, 0.23066400791935, 0.423899673442923, 0.544147642402958, 0.586339877917035, 0.894052395630858  
"10102", "AL928654.1", 8.12284588224065, 0.316868832544554, 0.582387953204453, 0.544085485973839, 0.586382647684585, 0.894052395630858  
"10103", "SAX02", 6.76895252762951, 0.317873549003863, 0.58396206031917, 0.544339385387685, 0.586207948903837, 0.894052395630858  
"10104", "CYB5D1", 30.6419644582384, -0.273168037967446, 0.501723624698206, -0.544459189323128, 0.586125524637318, 0.894052395630858  
"10105", "CHD3", 286.272389509061, 0.134319451972528, 0.24669748087797, 0.544470302228055, 0.586117879309207, 0.894052395630858  
"10106", "PEMT", 112.203855149256, -0.152170076458955, 0.278990587101542, -0.545430862165867, 0.585457219243514, 0.894052395630858  
"10107", "NARS", 356.084004290016, -0.11708124089433, 0.214732939435859, -0.545241178190559, 0.585587653896554, 0.894052395630858  
"10108", "GADD45GIP1", 668.990987644655, -0.138310331317936, 0.253834497567933, -0.544883901294468, 0.585833369100552, 0.894052395630858  
"10109", "ZNF181", 70.5569822461351, 0.131023097483512, 0.240324841903678, 0.545191651623037, 0.585621712661756, 0.894052395630858  
"10110", "HUNK", 86.7569023536494, 0.192799119669441, 0.353710957004979, 0.545075338637947, 0.585701703178597, 0.894052395630858  
"10111", "PES1", 73.6649918786337, -0.127146302559693, 0.232814231569586, -0.546127707496651, 0.584978155052761, 0.894052395630858  
"10112", "NONO", 412.377975224617, 0.0826458826542344, 0.151833319870043, 0.544319802300131, 0.586221422441758, 0.894052395630858  
"10113", "ATF1", 151.052008568719, 0.095455705951757, 0.17558829283889, 0.543633658078455, 0.586693593406462, 0.894108524924643  
"10114", "ARHGEF25", 80.3387200810285, -0.152822856126632, 0.28115852587104, -0.543546939055755, 0.586753281747499, 0.894108524924643  
"10115", "AL132639.2", 4.21825906450132, -0.413076080989968, 0.75990669984426, -0.543587891874919, 0.586725093742531, 0.894108524924643  
"10116", "TMEM104", 22.1040396896367, 0.205810432438908, 0.378472084371859, 0.543792900288768, 0.586583994986275, 0.894108524924643  
"10117", "METTL21A", 74.6764129961624, 0.12867265129062, 0.236812647209382, 0.543352108964231, 0.586887392746375, 0.894224489392644

"10118", "OLFML1", 532.254598423149, 0.0866195802103813, 0.159453474024176, 0.543227927396854, 0.586972880349493, 0.894266352103917  
"10119", "MYL5", 66.3621869487681, 0.195846542157103, 0.360645163100548, 0.543044971055112, 0.587098839493417, 0.894369059786066  
"10120", "AC073389.1", 5.30175580713319, -0.355920983552796, 0.655619690278112, -0.542877202790867, 0.587214353168652, 0.894369059786066  
"10121", "SHFL", 186.598247000175, -0.0966941942987661, 0.178089998476017, -0.542951289382978, 0.587163340945144, 0.894369059786066  
"10122", "AC018362.1", 10.548284328542, 0.313195161995653, 0.577156307909052, 0.542652237710631, 0.587369265145809, 0.894428254689583  
"10123", "MIR222HG", 164.955278421988, -0.358609691613637, 0.66078452710493, -0.542702918884617, 0.58733436420835, 0.894428254689583  
"10124", "CTH", 5.70737273969445, -0.405908277862734, 0.749951089082619, -0.541246334289965, 0.588337804827234, 0.894502089070145  
"10125", "CCDC18", 47.8771968816825, -0.144880812522791, 0.26731189940174, -0.541991631674621, 0.587824270753821, 0.894502089070145  
"10126", "CSTA", 27.7565698321697, -0.243583380098788, 0.450050763844002, -0.541235344249343, 0.588345378872372, 0.894502089070145  
"10127", "UBA5", 131.579760023991, -0.113942595003513, 0.210556416003582, -0.541149954801539, 0.588404228554737, 0.894502089070145  
"10128", "AC124852.1", 61.817247979889, 0.160167695797865, 0.295779673130839, 0.541510152142925, 0.588156002068114, 0.894502089070145  
"10129", "HMG3", 714.181221281632, -0.128850422923329, 0.237957431360976, -0.541485181556974, 0.58817320874253, 0.894502089070145  
"10130", "BHLHE22", 45.0665799527724, 0.268543219851833, 0.49537405827307, 0.542101903333422, 0.587748307612148, 0.894502089070145  
"10131", "C11orf68", 189.356359718401, -0.109031834057287, 0.20146949662268, -0.541182838519154, 0.588381565053786, 0.894502089070145  
"10132", "CDON", 332.554371005392, 0.130895235502591, 0.241848354403909, 0.541228555493845, 0.588350057525501, 0.894502089070145  
"10133", "MAG0HB", 115.951910031867, -0.169840321576004, 0.313423640207909, -0.541887400271851, 0.587896077101621, 0.894502089070145  
"10134", "ANP32A", 308.231280933443, -0.107210529500915, 0.198013493784211, -0.541430421998156, 0.588210943148952, 0.894502089070145  
"10135", "GGA2", 112.384361109962, 0.101562112107216, 0.187536039506253, 0.541560504181543, 0.588121306307787, 0.894502089070145  
"10136", "COX4I1", 2522.37533593577, -0.134788456067094, 0.248775042194091, -0.541808594939094, 0.58795036979676, 0.894502089070145  
"10137", "RAB11B-AS1", 86.9581989802743, 0.158838197778968, 0.292963809124487, 0.542176858819697, 0.587696675411886, 0.894502089070145  
"10138", "ZNF331", 124.459872062602, -0.134213957782234, 0.247424353320189, -0.542444411721062, 0.587512391873397, 0.894502089070145  
"10139", "SS18L1", 35.4573120524742, 0.170109341605538, 0.313947995485173, 0.541839234688064, 0.587929260359122, 0.894502089070145  
"10140", "OPRL1", 3.66033065237137, 0.462275856788258, 0.853722897792113, 0.541482321703904, 0.58817517941841, 0.894502089070145  
"10141", "AC092821.3", 32.0366060734936, -0.197148395327508, 0.364519206815983, -0.540845013489323, 0.588614413712277, 0.894733378106178  
"10142", "CDK2AP2", 79.0886180232656, -0.13678925785509, 0.252958376942555

, -0.540757967806512, 0.588674417554163, 0.894736358370876  
"10143", "ENKD1", 67.9499042649753, 0.12549114663592, 0.23211533695257, 0.5  
40641339273338, 0.588754818387673, 0.894770336729367  
"10144", "ODR4", 172.653426966403, 0.095314313415606, 0.176366619919581, 0.  
540432840744282, 0.588898564762327, 0.894771694696502  
"10145", "SLC25A4", 197.821315411686, 0.0961288832202087, 0.17789547111651  
9, 0.540367231480815, 0.588943801495838, 0.894771694696502  
"10146", "CDKL3", 32.2511071647186, 0.171879332832656, 0.317984673985179, 0.  
540527097355225, 0.588833578862858, 0.894771694696502  
"10147", "SRSF12", 5.19611478472845, -0.440836908771717, 0.815906402640254  
, -0.54030328398598, 0.588987894004892, 0.894771694696502  
"10148", "NAPRT", 150.71898862459, 0.160386488701915, 0.296986536718285, 0.  
540046328275325, 0.589165083184435, 0.894952676122199  
"10149", "NPTN-  
IT1", 10.4409704080783, 0.327279391276879, 0.606206113837354, 0.5398813766  
57789, 0.589278841978968, 0.895037279446821  
"10150", "SNX21", 538.437833766525, -0.122619268179885, 0.227305549136652,  
-0.539446875123004, 0.58957854421476, 0.895404261977391  
"10151", "TATDN1", 252.57966533211, -0.13684792962325, 0.253741520866166, -  
0.539320207257011, 0.589665928003068, 0.89544875186359  
"10152", "MYBL1", 9.40269102853425, 0.35246040876674, 0.653705680584671, 0.  
539172932460218, 0.589767535307116, 0.895514830256027  
"10153", "RAD54B", 3.72558376873635, 0.404405077636117, 0.75069568483969, 0.  
538707076386721, 0.590088990192367, 0.895594041054748  
"10154", "SYCP3", 2.44771578649761, 0.554674675412815, 1.02940863490548, 0.  
538828465785839, 0.590005220033534, 0.895594041054748  
"10155", "DIABLO", 2.94063613368035, -0.438663911271935, 0.814336683851627  
, -0.538676348457194, 0.590110196236982, 0.895594041054748  
"10156", "MRPL58", 105.547363606949, 0.139396031937655, 0.25870491657871, 0.  
538822507825218, 0.590009331461641, 0.895594041054748  
"10157", "ZCCHC3", 80.1304722314988, 0.141202848716076, 0.262048751832842,  
0.53884190528848, 0.58999594584331, 0.895594041054748  
"10158", "RTL8C", 607.615508737595, -0.0851164087398264, 0.158078140794984  
, -0.53844515321202, 0.590269760600737, 0.895748017292809  
"10159", "PPT1", 245.121669583053, 0.100958720453198, 0.187551589371975, 0.  
538298399876338, 0.590371055874128, 0.895767212778113  
"10160", "IMPA1", 63.0356412042123, 0.118179472365746, 0.219632318547323, 0.  
538078699653132, 0.590522717088998, 0.895767212778113  
"10161", "NCBP1", 42.9564486542547, 0.15527449366636, 0.288493294847311, 0.  
538225658757654, 0.590421267794682, 0.895767212778113  
"10162", "FBX03", 145.441619836337, -0.0933244776818461, 0.173463662583794  
, -0.538005921769146, 0.590572960328509, 0.895767212778113  
"10163", "CENPV", 47.7393084165212, -0.208512498054269, 0.387552524819213,  
-0.538023841159433, 0.590560589241912, 0.895767212778113  
"10164", "ZNHIT1", 779.608197233284, -0.127797856306379, 0.237620128798559  
, -0.537824202657172, 0.590698421270808, 0.895781226157354  
"10165", "AC104389.5", 4.48899939616389, 0.451141191926928, 0.838700743667  
707, 0.537904843095822, 0.59064274468096, 0.895781226157354  
"10166", "VAR52", 25.9959450104316, 0.181810318310832, 0.33817111568824, 0.  
537628170699365, 0.59083377771365, 0.895898355641936

"10167","OXSR1",91.2478176301497,-0.12195969116552,0.226908004450251,-  
0.537485186831562,0.590932514429001,0.895959939994398  
"10168","SNX24",85.9673318261928,0.125799518348766,0.234092028955181,0  
.537393429884158,0.59099588067658,0.895967889519029  
"10169","PLCD1",59.3064907253966,0.114883917752687,0.213864112003768,0  
.537181842602289,0.591142012225727,0.896024834326913  
"10170","DGCR8",76.2425141814882,-0.130577229208418,0.243083297212887,  
-0.537170717632901,0.591149696082044,0.896024834326913  
"10171","LINC01873",2.50495159665981,0.535318367930234,0.9971221111000  
44,0.536863401153206,0.591361973305576,0.896148490736473  
"10172","SNHG32",740.656600696797,0.14098402586183,0.262561519285988,0  
.536956162674651,0.591297895086873,0.896148490736473  
"10173","TENM4",7.6363971915749,0.523530309052795,0.975432687553741,0.  
536715978183734,0.591463817369632,0.896148490736473  
"10174","SORD",43.5539484534149,-0.142322171357789,0.265136173949249,-  
0.536788961075645,0.591413397663332,0.896148490736473  
"10175","GMCL1",98.3165376742444,0.116128343203391,0.216612904061735,0  
.536109996338418,0.591882531833613,0.896216326007116  
"10176","UXS1",175.609095187844,-0.11236782332983,0.209686317780485,-0  
.535885338248276,0.59203779810815,0.896216326007116  
"10177","RYBP",217.0526195161,-0.123248273290221,0.229994204849844,-0.  
53587555986763,0.592044556592198,0.896216326007116  
"10178","LRPAP1",878.960828216547,-0.107961527753355,0.201524017450712  
, -0.535725364743485,0.592148370801796,0.896216326007116  
"10179","AL031963.3",16.9586078810252,-0.259436785075863,0.48431329718  
7556,-0.535679665585133,0.592179959516774,0.896216326007116  
"10180","NUP214",109.443501163346,0.112139885311147,0.209223951157951,  
0.535980152800424,0.591972267351842,0.896216326007116  
"10181","VSTM4",151.97943087435,0.143396381575736,0.267706327860683,0.  
535648083934576,0.592201790212217,0.896216326007116  
"10182","MXI1",248.083757196864,-0.165824127805592,0.309250906370048,-  
0.536212261273594,0.591811860422752,0.896216326007116  
"10183","SIK3",140.787002537605,-0.115661406705512,0.215797375520305,-  
0.535972258358762,0.591977723441349,0.896216326007116  
"10184","SUM02",3149.87722072549,-0.128175723104184,0.239293809210829,  
-0.535641617837489,0.592206259922704,0.896216326007116  
"10185","TNRC6C",259.687462476529,0.144017949318468,0.268547277485275,  
0.536285270389176,0.591761408967989,0.896216326007116  
"10186","MPND",52.6731968282177,0.133595874484007,0.249029972267324,0.  
536465041808691,0.591637190029129,0.896216326007116  
"10187","UFSP2",229.521573605367,-0.121204616782648,0.226395407700447,  
-0.535366940583083,0.592396145756476,0.896330141859976  
"10188","AC015922.3",78.8973486175811,0.109502933847075,0.204571124141  
851,0.53528050112852,0.592455907584255,0.896330141859976  
"10189","MPRIP",213.079217348205,0.111898288844356,0.209041054521308,0  
.535293361873801,0.59244701584859,0.896330141859976  
"10190","AC108673.3",13.5070032938563,0.252074198197025,0.471041594098  
507,0.535142121959424,0.592551584838482,0.896386916612876  
"10191","LY75",7.53661636622192,-0.40637403976157,0.759595625716105,-0  
.534987335371321,0.592658614802409,0.896432253128274

"10192", "RAB28", 136.722308700761, -0.132621461428489, 0.247922751310856, -0.534930581107508, 0.592697860777384, 0.896432253128274  
"10193", "BEX4", 275.154553338449, 0.148507086523997, 0.277711206069436, 0.534753669561558, 0.59282020400847, 0.896529328440161  
"10194", "ARL4C", 382.681692776584, 0.332531853232627, 0.622070780586516, 0.534556297466828, 0.59295671039802, 0.896647801725082  
"10195", "AC121247.1", 12.1021343861506, -0.264337213013145, 0.495025750457969, -0.533986793148833, 0.593350671414152, 0.896657799942188  
"10196", "SYCP2L", 2.63205060117165, 0.583115578248333, 1.09117684006314, 0.534391454106182, 0.593070730318956, 0.896657799942188  
"10197", "SYNGAP1", 67.6388602748031, -0.152744227960202, 0.28603391465866, -0.534007403081836, 0.593336412170965, 0.896657799942188  
"10198", "USP15", 220.272396005878, -0.0963233518972147, 0.180319372833416, -0.534181937213152, 0.593215664813788, 0.896657799942188  
"10199", "RNASEK", 1704.46963735691, -0.132386666491217, 0.247934542375863, -0.533958137589889, 0.593370497386329, 0.896657799942188  
"10200", "TMEM11", 176.087030134056, -0.134543854711589, 0.251921189108399, -0.534071211666504, 0.593292266388568, 0.896657799942188  
"10201", "PSPN", 9.10727844641461, 0.288047144343293, 0.539258245014938, 0.534154362971889, 0.593234740659083, 0.896657799942188  
"10202", "TCF7L1", 386.374238619962, 0.0955794677016756, 0.179118738979993, 0.533609538823024, 0.593611707319536, 0.896758571964979  
"10203", "DCAF17", 26.2595489312695, 0.183758510341348, 0.344360508079214, 0.533622485825458, 0.593602747949536, 0.896758571964979  
"10204", "C1GALT1C1", 233.697660633242, -0.147860103773841, 0.277008663661849, -0.533774293624036, 0.593497701051463, 0.896758571964979  
"10205", "PLEKHB2", 126.223618772573, 0.137991782468024, 0.258731330079523, 0.533340057524579, 0.593798203350929, 0.896916644821396  
"10206", "AC022075.1", 6.1478074063366, 0.361173374164015, 0.67725485492365, 0.533290195763502, 0.593832713399103, 0.896916644821396  
"10207", "ETFA", 269.512219777079, -0.114444545938161, 0.214648649527831, -0.533171516289099, 0.593914856876345, 0.896952828328486  
"10208", "GLYCTK", 10.0132195787878, -0.285598982961004, 0.535872260853538, -0.532960938314108, 0.594060620290554, 0.896976250506972  
"10209", "TM7SF2", 5.12784330890954, -0.363895227146549, 0.68286230894267, -0.532896928679512, 0.594104931409419, 0.896976250506972  
"10210", "FOXJ2", 81.865707067622, -0.111550192796099, 0.209309900750527, -0.532942743731236, 0.594073215464497, 0.896976250506972  
"10211", "FGR", 8.33812267055816, -0.296944660879484, 0.557372124552538, -0.532758363396578, 0.594200859376613, 0.897013326931615  
"10212", "SS18L2", 235.45962888196, -0.147742610638303, 0.277350206775198, -0.532693349524177, 0.594245870556319, 0.897013326931615  
"10213", "EFCAB7", 64.4002053560324, 0.163416286655688, 0.306880063138925, 0.532508645182693, 0.594373755774374, 0.897118520049151  
"10214", "SLC22A5", 27.2897633136366, -0.163324220287041, 0.306807076439939, -0.532335245269396, 0.59449382550312, 0.897211897408518  
"10215", "TAF12", 246.670973358235, -0.144889467332535, 0.272763788200583, -0.531190259118956, 0.595286942395543, 0.897357365423626  
"10216", "RAVER2", 21.1711310101864, -0.220646660742572, 0.415827744072942, -0.530620344331491, 0.59568189480368, 0.897357365423626

"10217", "SSX2IP", 16.7154716807802, -0.20830433590886, 0.391481502277651, -0.532092409722909, 0.594661994148479, 0.897357365423626  
"10218", "NDUFS2", 299.948317493958, -0.111437665750448, 0.20984630474345, -0.531044212985724, 0.595388141351517, 0.897357365423626  
"10219", "AC007365.1", 3.90040272778857, 0.410314839855943, 0.773064105776467, 0.530764314097628, 0.595582112106559, 0.897357365423626  
"10220", "LINC01886", 28.0989341633, -0.24407564705667, 0.460294983110336, -0.530259194674218, 0.595932234280601, 0.897357365423626  
"10221", "EPM2AIP1", 167.141946538367, 0.0946532963649334, 0.177973357397524, 0.531839696396323, 0.594837026435546, 0.897357365423626  
"10222", "CGGBP1", 322.11838336546, 0.0820014621741089, 0.154562968637872, 0.530537572464926, 0.595739265855905, 0.897357365423626  
"10223", "NPY1R", 27.2886915716563, 0.552641237884165, 1.04004683995723, 0.531361873958378, 0.59516803628708, 0.897357365423626  
"10224", "SNHG4", 3.05762080786293, -0.472171500095233, 0.890134240336489, -0.53044976667423, 0.595800128788676, 0.897357365423626  
"10225", "SPRY4", 20.7538798035283, 0.291694005840407, 0.548407892522242, 0.531892428642568, 0.594800501505417, 0.897357365423626  
"10226", "AL138724.1", 16.44889534747, -0.244451302468151, 0.46075847746666, -0.530541084804753, 0.595736831322567, 0.897357365423626  
"10227", "PRRC2A", 241.866299714194, 0.0962828845479612, 0.181703772715452, 0.529889297888935, 0.596188686738471, 0.897357365423626  
"10228", "SDHAF4", 43.7084066349614, -0.171798791658927, 0.324208950357789, -0.52990144617949, 0.596180263431024, 0.897357365423626  
"10229", "MAPKAP1", 156.058868869663, -0.10066670243284, 0.189771276167247, -0.530463326515872, 0.595790729545455, 0.897357365423626  
"10230", "GBGT1", 17.5024079823837, -0.224675768323016, 0.422335557200972, -0.531984021928094, 0.594737061955909, 0.897357365423626  
"10231", "CLNS1A", 297.494051333927, -0.130843323176318, 0.246407037468571, -0.531004814312606, 0.595415443005035, 0.897357365423626  
"10232", "DAZAP2", 498.668667011438, 0.0713197768958676, 0.134494560897165, 0.530280008500855, 0.595917805379297, 0.897357365423626  
"10233", "GPR137C", 2.47250978806504, 0.553892892328562, 1.04445618648986, 0.530317019989175, 0.595892148063433, 0.897357365423626  
"10234", "SPG21", 262.177736444053, -0.107339114293645, 0.201955791733402, -0.531498073773202, 0.595073675766416, 0.897357365423626  
"10235", "EME2", 10.3580134166665, 0.305842914354663, 0.576683980434719, 0.530347512209567, 0.595871010450161, 0.897357365423626  
"10236", "ZKSCAN2-  
DT", 9.67511910845482, -0.300491483320503, 0.566199997252077, -0.530716151146008, 0.595615492080479, 0.897357365423626  
"10237", "CRK", 336.813790102489, 0.0845837208647628, 0.159630444372204, 0.529872113038426, 0.596200602357675, 0.897357365423626  
"10238", "AP2B1", 490.019942154204, 0.112110924597466, 0.211250193337668, 0.530702115942045, 0.595625219525728, 0.897357365423626  
"10239", "LIN37", 73.3942432655638, 0.135568304159272, 0.25577390855561, 0.530031796147015, 0.596089885579844, 0.897357365423626  
"10240", "ZNF565", 37.898782103563, -0.149752601731352, 0.281829281708293, -0.53135927120005, 0.595169839569185, 0.897357365423626  
"10241", "ZIM2", 2.7841216229684, -0.54296441399932, 1.02204014877044, -0.5



31255464526055,0.595241762500894,0.897357365423626  
"10242","PLTP",2744.7665110438,-0.153227080364191,0.28919288931405,-0.529843872467394,0.596220184020031,0.897357365423626  
"10243","C7orf31",12.8777449011501,-0.304748512641838,0.57577306674641,-0.529285807625418,0.596607199362938,0.897501705687488  
"10244","MYORG",7.60969718478915,0.374712128567472,0.707908072268651,0.529323146954127,0.596581301144177,0.897501705687488  
"10245","KLRB1",18.9720699761507,0.25933527789672,0.489817885615081,0.529452446537478,0.596491624084571,0.897501705687488  
"10246","AC138150.2",7.05454560014081,-0.294487832402298,0.556069809943975,-0.529587881118682,0.596397698616674,0.897501705687488  
"10247","MORC3",235.281518645221,0.111849938159898,0.21125330320433,0.529458884019031,0.596487159463264,0.897501705687488  
"10248","AL139246.5",2.78382945586081,-0.55991925688103,1.05828535999972,-0.529081548365348,0.596748880785378,0.897627244077537  
"10249","EIF4EBP3",248.276069180008,0.167143952635924,0.316168571307364,0.528654546354117,0.597045113889844,0.897631867657895  
"10250","RIOK1",110.013427878493,-0.111391478273491,0.210627648061787,-0.528854968939379,0.596906062175017,0.897631867657895  
"10251","AL513550.1",11.0192781149123,0.236332355979807,0.446961509923712,0.528753261148023,0.596976624450655,0.897631867657895  
"10252","HTRA4",7.89323028606833,0.38274389710058,0.72410722509694,0.528573509329837,0.597101340964259,0.897631867657895  
"10253","RFX3",39.6479245804102,0.169900110609977,0.321335329825074,0.528731498968589,0.59699172298944,0.897631867657895  
"10254","FKBP2",87.8282894600497,-0.179507653868605,0.339501588756605,-0.528738774171973,0.596986675454495,0.897631867657895  
"10255","SETMAR",63.3647495248706,-0.163053046043008,0.308583314030263,-0.528392296762414,0.597227082978863,0.897720433017878  
"10256","RHEB",647.533478018617,-0.13162095872817,0.249164966828892,-0.528248254171935,0.597327041620125,0.897720433017878  
"10257","AIFM1",67.076082961051,-0.135278933031332,0.256095227540601,-0.528236837251819,0.597334964739823,0.897720433017878  
"10258","AC022509.1",2.77604359971252,-0.519691360479443,0.984257328244981,-0.528003547005436,0.597496874079672,0.897756334958144  
"10259","Z93241.1",23.0616304005135,0.22311138750032,0.422598924165726,0.527950675550763,0.597533570980899,0.897756334958144  
"10260","IDH3G",390.62836303559,-0.140691940878057,0.266441897026224,-0.528039855774672,0.597471673563493,0.897756334958144  
"10261","LCLAT1",22.5113093154237,0.211193917373323,0.400136705979303,0.527804408386985,0.597635097103962,0.897821364570469  
"10262","B4GALT3",57.0965643301676,0.14120276336204,0.267683384069441,0.527499171653517,0.597846991515039,0.897964666686576  
"10263","Z69706.1",5.38858427696414,0.326645511574237,0.6191918317869,0.527535239978189,0.597821951215882,0.897964666686576  
"10264","GLCCI1",27.8307076216102,0.176414686617218,0.334667274820787,0.52713455987499,0.598100148621956,0.898108305208256  
"10265","CENPJ",38.918862543951,-0.159418919510437,0.302439736248838,-0.527109702870762,0.598117409099446,0.898108305208256  
"10266","CUL4B",131.692936094467,0.105061819713153,0.199287554571932,0

.527187058613996,0.598063694718689,0.898108305208256  
"10267","RAPH1",76.8896828924238,-0.134937442736539,0.256104796745028,  
-0.52688369937436,0.598274354245213,0.898168988185621  
"10268","AKT1S1",129.980814168545,-0.115542516021278,0.219274340729532  
, -0.526931311875636,0.598241288817844,0.898168988185621  
"10269","SSR3",899.926528883689,0.132635161296493,0.252015896217541,0.  
526296806222103,0.598682001720461,0.89821939155974  
"10270","NACAD",23.6305451237245,-0.192447177009103,0.365605794083361,  
-0.526378903517113,0.598624970551239,0.89821939155974  
"10271","RFC5",37.9019912285896,-0.145656729959544,0.276573939709762,-  
0.526646617943819,0.598439012402432,0.89821939155974  
"10272","COX16",520.365394632784,-0.119265952182737,0.226575343755282,  
-0.526385396601462,0.598620460054778,0.89821939155974  
"10273","B2M",22941.5180244448,0.142220322129453,0.270053119386445,0.5  
26638323795608,0.598444773239178,0.89821939155974  
"10274","RANGRF",135.567278103431,-0.132596218651585,0.251847811951242  
, -0.526493431188739,0.598545414836129,0.89821939155974  
"10275","PLEKHH3",142.575558526983,-0.10397893743793,0.197585378749167  
, -0.526248136862043,0.598715812408455,0.89821939155974  
"10276","PRKCH",10.1628726982584,0.286718065545914,0.544928082624824,0.  
.526157624626066,0.59877869371693,0.898226310203043  
"10277","GPANK1",118.118876494942,-0.127448751343692,0.242336796721251  
, -0.525915804236242,0.598946707596573,0.898390921241722  
"10278","IFIH1",50.2470068637969,-0.166289043831132,0.31638094661719,-  
0.525597529210051,0.599167873801916,0.898601309276275  
"10279","ANKZF1",55.7745232336418,-0.135759507286515,0.258369081483723  
, -0.525447961911292,0.599271819436606,0.898601309276275  
"10280","AC002074.1",17.5690985999342,-0.264325361987257,0.50304186642  
6083,-0.525454002199034,0.599267621425234,0.898601309276275  
"10281","FGF16",49.7601644587467,0.151503160947366,0.288369588276183,0.  
.525378427916141,0.599320146653869,0.898601309276275  
"10282","GNPAT",113.376748887139,-0.105588216771231,0.201140291415577,  
-0.524948114712007,0.599619260344174,0.898874929320766  
"10283","GCAT",17.036217332606,0.213472717220137,0.406632877577894,0.5  
24976530406704,0.599599506313604,0.898874929320766  
"10284","STAM-  
AS1",4.93387550789955,0.421787247022018,0.804019766996998,0.5245981060  
8561,0.5998626036034,0.899107378614844  
"10285","ZNF100",47.6493437309701,0.184983692304858,0.352647254443986,  
0.524557301875268,0.599890975611656,0.899107378614844  
"10286","AC017083.1",5.38084842780455,-0.362737771009923,0.69205321779  
0824,-0.524147221174488,0.600176146887231,0.899178288743625  
"10287","LRR1",31.3583370314157,-0.188404187468386,0.359478780217086,-  
0.524103779796433,0.600206359735566,0.899178288743625  
"10288","ST3GAL2",91.455541046307,0.128297751314434,0.244849577523112,  
0.523986002394976,0.600288275670493,0.899178288743625  
"10289","IST1",238.485970570491,0.0918719688759408,0.175266296924085,0.  
.524185028658043,0.600149852890689,0.899178288743625  
"10290","KPNB1",542.020516712969,0.0983992733472495,0.187734916817293,  
0.524139435622481,0.600181561575129,0.899178288743625

"10291", "SCAND1", 597.111354846787, -0.147822211738333, 0.282090525814331, -0.524024021408034, 0.600261832328681, 0.899178288743625  
"10292", "SNCAIP", 48.2599483731548, 0.151058089152826, 0.28851731432848, 0.523566807435499, 0.600579873013889, 0.899206983855411  
"10293", "NUDT1", 311.077461279393, -0.150224441445085, 0.286928959866405, -0.523559704517209, 0.600584814445714, 0.899206983855411  
"10294", "AGBL3", 8.50394562299287, -0.255018866714359, 0.487033467728295, -0.523616719614489, 0.6005451501101, 0.899206983855411  
"10295", "CA13", 5.11682410270582, -0.350637952818973, 0.669756989133749, -0.523530113918604, 0.600605400537824, 0.899206983855411  
"10296", "TUT1", 23.770039344511, 0.191456846618942, 0.36562023368307, 0.52364948375615, 0.600522357245974, 0.899206983855411  
"10297", "BCAR1", 65.1444143671184, -0.130561276809203, 0.249501929562024, -0.523287643660275, 0.600774098392921, 0.899206983855411  
"10298", "PECAM1", 6.99399604172374, -0.346756585007903, 0.662588757968503, -0.523336052472516, 0.600740416416488, 0.899206983855411  
"10299", "SNHG20", 22.4669870147003, -0.170480620650113, 0.325699848415694, -0.523428615270729, 0.60067601527054, 0.899206983855411  
"10300", "B3GALT6", 64.090825365111, 0.140905085414103, 0.269467611911006, 0.522901748432157, 0.601042627822472, 0.899224872036054  
"10301", "ABCG2", 2.55565786322078, 0.48145750479683, 0.921080505289763, 0.522709472225089, 0.601176445560469, 0.899224872036054  
"10302", "DNAJA1", 1678.49087773876, 0.123916922632509, 0.236884741476286, 0.523110614302333, 0.600897279484888, 0.899224872036054  
"10303", "FAM219A", 44.4351726410413, -0.137087440435174, 0.262360237100018, -0.522516071606205, 0.601311059419244, 0.899224872036054  
"10304", "TRUB1", 59.5503187965818, -0.137860744175362, 0.263679834782345, -0.522833853749792, 0.601089878689063, 0.899224872036054  
"10305", "ANKDD1A", 33.6597701793658, 0.177927071145521, 0.340253320573867, 0.522925304139373, 0.601026234771808, 0.899224872036054  
"10306", "DPEP2", 3.09418200987411, -0.570868845452766, 1.09240501296977, -0.522579847835763, 0.601266667342331, 0.899224872036054  
"10307", "U2AF1L4", 56.2962381036478, 0.136256046556368, 0.260696209561238, 0.522662169832433, 0.601209368487735, 0.899224872036054  
"10308", "THOC5", 80.4004129153461, 0.109745854767109, 0.209814650760029, 0.523060970097023, 0.60093182511103, 0.899224872036054  
"10309", "COA6-AS1", 22.5942248414316, -0.226920410539033, 0.43512934929388, -0.521501045395525, 0.602017777521826, 0.89925285927401  
"10310", "HNRNPA3", 851.558744653238, -0.10948893438141, 0.209768481446658, -0.521951313306579, 0.60170422957099, 0.89925285927401  
"10311", "ATP13A3", 154.343061366369, 0.144933932690517, 0.277936893096204, 0.52146345552028, 0.602043956887147, 0.89925285927401  
"10312", "JARID2", 54.7904621819423, 0.148787332518268, 0.285482260118269, 0.521178907777418, 0.602242146023804, 0.89925285927401  
"10313", "CBLL1", 66.8523389091649, 0.130792676194604, 0.250967018614812, 0.521154839056149, 0.602258911374822, 0.89925285927401  
"10314", "AGAP3", 144.742526521784, -0.104108191803844, 0.199659897990338, -0.521427651980881, 0.602068892640942, 0.89925285927401  
"10315", "HNRNPH3", 617.658971527099, 0.0876309442765347, 0.16814958218172

,0.521148748272427,0.602263154015237,0.89925285927401  
"10316","CDK4",436.590679517116,-0.127505603590927,0.244635694880655,-  
0.521206047437724,0.60223241826331,0.89925285927401  
"10317","UBAC2-  
AS1",6.11128514418188,-0.291153674040626,0.558496290001937,-0.52131711  
3923202,0.602145880977814,0.89925285927401  
"10318","GSKIP",48.088719099882,0.151700414215306,0.290439467235131,0.  
522313360713108,0.601452168169327,0.89925285927401  
"10319","DUT",735.21260850444,-0.125197958083864,0.240064115151803,-0.  
521518836768653,0.602005386947828,0.89925285927401  
"10320","BABAM1",259.548479883869,-0.12422973250334,0.238077161514771,  
-0.521804492765816,0.601806461229883,0.89925285927401  
"10321","EXOSC5",54.7099304011031,-0.177329656348053,0.339697871401593  
, -0.522021688320834,0.601655229978442,0.89925285927401  
"10322","SRC",62.944244174099,0.166555036429911,0.319371172542203,0.52  
1509299365151,0.602012029136076,0.89925285927401  
"10323","NDUFV3",231.467092939151,-0.137765899504011,0.264314138421585  
, -0.521220318847537,0.602213301147826,0.89925285927401  
"10324","TMEM191B",5.87465324612059,0.45320337494002,0.868348101739679  
, 0.521914395888073,0.60172993456213,0.89925285927401  
"10325","POLG",63.8549374799128,-0.124456365269924,0.238858608598432,-  
0.521046178742337,0.602334602612714,0.899272435765132  
"10326","PARP9",125.808924354817,0.105354838842702,0.202615353670738,0.  
.51997460673148,0.60308127393869,0.899690103335421  
"10327","NAA15",127.012962170254,-0.111668351206085,0.214750908249854,  
-0.51999012305067,0.603070459197391,0.899690103335421  
"10328","BAG6",214.041199333388,-0.0925878372265407,0.177978705558673,  
-0.520218623547736,0.602911206417272,0.899690103335421  
"10329","PRCP",290.59615034435,-0.0969843785211795,0.186466999752486,-  
0.520115509178114,0.60298306934446,0.899690103335421  
"10330","FAM214A",124.190022835034,0.126920589514211,0.243865993847164  
, 0.520452185694062,0.602748445497854,0.899690103335421  
"10331","COLEC12",775.138275005354,0.155339463132669,0.298583645755595  
, 0.520254425655389,0.60288625595397,0.899690103335421  
"10332","ETV2",8.36905865354163,-0.313273874047912,0.602442089314397,-  
0.520006619066788,0.603058961711437,0.899690103335421  
"10333","Z68871.1",5.25770982558354,-0.369250838426732,0.7099021965437  
46,-0.520143253851699,0.602963733023556,0.899690103335421  
"10334","CLPX",139.728520745407,0.100679130814571,0.193762145229796,0.  
519601652299881,0.60334124622604,0.899990837098355  
"10335","AC006213.4",3.4271780024663,0.419485324258416,0.8075562911342  
66,0.519450258593393,0.603446791374497,0.900061179394085  
"10336","IFT27",129.547144829212,-0.135436140110187,0.260822294764979,  
-0.519265963180891,0.603575285372557,0.900165733747869  
"10337","LZIC",317.701229553744,0.0809699609977908,0.156133814123831,0.  
.518593371027066,0.60404433274359,0.900186650686287  
"10338","SPON2",2471.6294595529,-0.129863611264762,0.250751363232883,-  
0.517897927215465,0.604529488300691,0.900186650686287  
"10339","AC109347.1",4.64449180840233,-0.364394322678332,0.70329490116  
2316,-0.51812450520558,0.604371403745613,0.900186650686287

"10340", "RNF150", 7.80900093771364, 0.401377355646139, 0.775340231469051, 0.517678999947728, 0.604682252532338, 0.900186650686287  
"10341", "FANCE", 10.1847397836409, -0.271336750178784, 0.523021040587174, -0.518787446627703, 0.603908972925324, 0.900186650686287  
"10342", "MTHFD1L", 38.2942991978046, 0.177886322402412, 0.34329671700411, 0.518170764797272, 0.604339130486637, 0.900186650686287  
"10343", "DBNL", 261.09542263382, -0.104299024308319, 0.200954153737168, -0.519019001939787, 0.603747490366535, 0.900186650686287  
"10344", "CARNMT1", 37.5604157259995, 0.165590428017706, 0.319937278016875, 0.517571534783678, 0.604757246481167, 0.900186650686287  
"10345", "FANCC", 10.4904902895178, 0.253311854311051, 0.48803794999889, 0.519041304701053, 0.60373193784174, 0.900186650686287  
"10346", "DPP7", 817.91738443843, 0.130925623611551, 0.252302361912577, 0.51892349567824, 0.603814092384697, 0.900186650686287  
"10347", "IMMP1L", 62.2099602396813, -0.160288586071392, 0.309492852515514, -0.517907230388647, 0.604522997066693, 0.900186650686287  
"10348", "POLR2G", 319.995947467096, -0.123978988606784, 0.239023138299095, -0.518690322154697, 0.603976711581872, 0.900186650686287  
"10349", "PRR4", 11.364419271826, 0.32391816879883, 0.625208385991704, 0.51809632765087, 0.604391062350973, 0.900186650686287  
"10350", "ZSCAN32", 26.812118162678, 0.189373993727785, 0.365805830716569, 0.517689926803039, 0.604674627522638, 0.900186650686287  
"10351", "GIT1", 97.3397949902709, 0.0973547963620538, 0.188078901087633, 0.517627420189427, 0.604718246650433, 0.900186650686287  
"10352", "TMEM241", 22.7610900309791, 0.168708076270954, 0.325181011900744, 0.518812815314228, 0.603891280307882, 0.900186650686287  
"10353", "ZNF580", 190.906150726082, 0.132564440342397, 0.255640273811054, 0.518558513359975, 0.604068645988479, 0.900186650686287  
"10354", "GUCD1", 132.457136041798, 0.0979534402490436, 0.189223486328811, 0.517660054517922, 0.604695473189051, 0.900186650686287  
"10355", "TRMU", 58.6734100870541, -0.131058845220966, 0.252791224057151, -0.518446974216699, 0.604146447564583, 0.900186650686287  
"10356", "NEXMIF", 4.78857880042736, 0.38560826001446, 0.744573716396395, 0.517891313543453, 0.604534102970194, 0.900186650686287  
"10357", "CHDH", 9.17464477345079, 0.27943902000582, 0.540479170755027, 0.517020886513453, 0.60514157865343, 0.900634692280451  
"10358", "FP565260.1", 16.4754569310494, -0.230491144668432, 0.445847661628685, -0.516972868774159, 0.605175098452216, 0.900634692280451  
"10359", "ANKRD42", 47.6939258365681, -0.153953838221098, 0.298042122622851, -0.516550603204214, 0.605469905693912, 0.900986446208287  
"10360", "USP42", 74.8910507937018, 0.131968537407761, 0.255530874573953, 0.516448502075502, 0.605541197866011, 0.901005556477275  
"10361", "ZNF28", 28.5305451285269, 0.18858648617939, 0.365352815121316, 0.51617635987496, 0.605731239677364, 0.901201337672673  
"10362", "AL603840.1", 11.562451495878, -0.358147355364582, 0.694368396485831, -0.515788675258193, 0.606002012947529, 0.901379457402544  
"10363", "CIP2A", 17.9278593124197, -0.183770377741523, 0.356314161008017, -0.515753786550707, 0.606026383167043, 0.901379457402544  
"10364", "ZBED3", 95.1119409009961, -0.0998745114919038, 0.193599532838116, -0.51588198601397, 0.605936836316443, 0.901379457402544

"10365", "NAMPT", 1435.48324291942, -0.211999620639104, 0.411116991626821, -0.515667376821878, 0.606086743383304, 0.901382262349603  
"10366", "KATNA1", 144.952841820724, -0.119937679815923, 0.232766370522221, -0.515270653345831, 0.606363903116436, 0.901489027121198  
"10367", "LPXN", 20.824094084905, -0.222328872167849, 0.431514011828875, -0.515229786457125, 0.606392456842018, 0.901489027121198  
"10368", "RFLNB", 230.293627727137, -0.326230028985418, 0.63300153211148, -0.515370046415567, 0.606294459614109, 0.901489027121198  
"10369", "OSBPL1A", 731.408820585849, 0.0834032618869636, 0.161830931571848, 0.515372809616034, 0.606292529084469, 0.901489027121198  
"10370", "ZC3H15", 488.93172894108, -0.0849544950628895, 0.165017037774287, -0.5148225674678, 0.606677013891491, 0.901663363956227  
"10371", "KDM1B", 51.2598529271826, 0.135133811427887, 0.262492159392829, 0.514810848981033, 0.606685203435225, 0.901663363956227  
"10372", "WDR18", 108.091281930481, -0.129753313768975, 0.251994789015946, -0.5149047497199, 0.606619581657055, 0.901663363956227  
"10373", "NGLY1", 102.736177933119, -0.108492245093945, 0.211048811419581, -0.51406233640546, 0.607208408840352, 0.902282438814799  
"10374", "ZNF16", 17.4637201758007, 0.226255528275784, 0.4401452178695, 0.514047453181389, 0.607218814159243, 0.902282438814799  
"10375", "SCNM1", 109.159759146289, -0.146628724579638, 0.286149469820573, -0.51242004631908, 0.608357064154576, 0.902336171802458  
"10376", "CREB3L4", 27.6526220501987, -0.184588718693086, 0.35991944036567, -0.512861207234453, 0.608048411011644, 0.902336171802458  
"10377", "WDR92", 74.5191146387347, 0.143984521740957, 0.280719067150015, 0.512913223895875, 0.608012022755886, 0.902336171802458  
"10378", "AC009961.4", 2.62041453272811, 0.558700917517915, 1.09106824703551, 0.51206780055779, 0.608603558940903, 0.902336171802458  
"10379", "NEPRO", 109.365984325289, -0.0995633649122147, 0.194016388958923, -0.513169869032528, 0.607832500862247, 0.902336171802458  
"10380", "CTBP1", 213.482682615525, -0.0984300946421152, 0.192040173872327, -0.512549497625189, 0.608266487806345, 0.902336171802458  
"10381", "MIR3936HG", 13.0359100545593, -0.215118607163169, 0.420423629399432, -0.511671067276741, 0.608881238477463, 0.902336171802458  
"10382", "NFKBIL1", 188.633330421968, -0.127691760731782, 0.248721541874303, -0.513392445903675, 0.607676828679626, 0.902336171802458  
"10383", "CLIP2", 30.5822633918145, -0.162433128509426, 0.316214963890614, -0.513679449292652, 0.607476122291593, 0.902336171802458  
"10384", "RALGDS", 190.81734174621, -0.105243654565988, 0.205626790721071, -0.511818786827001, 0.608777840773449, 0.902336171802458  
"10385", "RET", 3.82747232619401, 0.445302426793882, 0.868147638770299, 0.512933983699636, 0.607997500506103, 0.902336171802458  
"10386", "DENND10", 242.665237720645, -0.102674888320584, 0.200075838455281, -0.513179847768237, 0.607825521267684, 0.902336171802458  
"10387", "UVRAG", 149.218637170911, 0.106783918763308, 0.207941483007673, 0.5135286967217, 0.607581542459548, 0.902336171802458  
"10388", "PPHLN1", 243.015551121576, -0.0884515162587631, 0.172131669644111, -0.513859631069868, 0.607350133204744, 0.902336171802458  
"10389", "FGD6", 19.6468136553524, 0.234256011640522, 0.4570350927237, 0.512555852646836, 0.608262041388311, 0.902336171802458

"10390", "PSEN1", 155.747439880256, 0.103309954215733, 0.201161679851188, 0.51356677023257, 0.607554917162049, 0.902336171802458  
"10391", "LOXL1-  
AS1", 25.0269004136395, 0.232439925570502, 0.45413791243215, 0.51182673634461, 0.608772276654643, 0.902336171802458  
"10392", "MTHFS", 114.72365913258, -0.14980747482688, 0.291970450462268, -0.513091220668716, 0.607887512458007, 0.902336171802458  
"10393", "BFAR", 291.763121714323, -0.098232574414548, 0.191784008508494, -0.512204198767684, 0.608508104829123, 0.902336171802458  
"10394", "AC012645.1", 10.9051873877305, -0.244857564599747, 0.478371809946472, -0.51185617444127, 0.608751672196854, 0.902336171802458  
"10395", "CES4A", 8.29386490913191, 0.386576909017662, 0.754868593878992, 0.51211152795639, 0.608572956933412, 0.902336171802458  
"10396", "CENPBD1", 17.3827471435378, -0.201065200345583, 0.392073478866606, -0.51282530235612, 0.60807352883576, 0.902336171802458  
"10397", "TRIM65", 65.0573864784836, -0.119550287071876, 0.233483204884831, -0.512029493217066, 0.608630368359891, 0.902336171802458  
"10398", "PIK3R2", 99.2728638865571, 0.128629134149156, 0.251362130396748, 0.511728373506894, 0.60884112550873, 0.902336171802458  
"10399", "LINC00662", 95.3127319682576, 0.102031537992403, 0.199415556749953, 0.511652850235452, 0.608893990210131, 0.902336171802458  
"10400", "RCN3", 557.388788101575, -0.142952199352596, 0.279277281386208, -0.511864762658263, 0.608745661148163, 0.902336171802458  
"10401", "TXN2", 517.715335592005, -0.120182499921782, 0.233984444145171, -0.513634572421477, 0.607507503505426, 0.902336171802458  
"10402", "FGD1", 37.7248918002346, 0.151401431527458, 0.295258117058234, 0.512776525962866, 0.608107651872128, 0.902336171802458  
"10403", "CNOT11", 62.224787509341, -0.136859565278562, 0.267565697926651, -0.511498919103148, 0.609001745089626, 0.902350576480124  
"10404", "CD2BP2", 233.840113337977, -0.113997941349604, 0.222882197676392, -0.51147172155544, 0.609020784800467, 0.902350576480124  
"10405", "NLGN3", 5.25028400903768, 0.339186406766067, 0.663339959609196, 0.511331183735558, 0.609119172870487, 0.902409615550077  
"10406", "POFUT2", 112.166368226303, 0.130192835858626, 0.254685592149185, 0.51119042408321, 0.609217723328841, 0.902468883827992  
"10407", "ARMC5", 26.69022521784, -0.1833945013368, 0.358953702641585, -0.510914081641106, 0.609411220379704, 0.902668776991749  
"10408", "GTF2H5", 590.132425751409, 0.129152355140443, 0.252960697221428, 0.510562931550547, 0.609657137722111, 0.902946269983315  
"10409", "MRI1", 84.697893680252, -0.12258484865382, 0.240195694281356, -0.510354063675384, 0.609803432934506, 0.903054549940805  
"10410", "ZNF428", 508.52800575744, -0.13898816031503, 0.272370245010786, -0.510291277630292, 0.609847412577605, 0.903054549940805  
"10411", "PEX1", 78.0837560943353, 0.124777405739582, 0.244576539825412, 0.510177328654062, 0.609927233838496, 0.903085996505659  
"10412", "LDB1", 51.9035413394853, 0.144197802753859, 0.282718954132512, 0.510039389457677, 0.61002386645797, 0.903142326301346  
"10413", "SMARCAL1", 73.6242232570597, 0.107614495991329, 0.211143961866459, 0.509673566035439, 0.610280175162064, 0.903405435181191  
"10414", "DNAJC1", 400.533329272638, -0.0782309684400079, 0.15355930138642

2,-0.509451187480625,0.61043600472574,0.903405435181191  
"10415","KLHL42",116.13187450314,0.138600482987019,0.27201477496002,0.509532921538509,0.610378728344126,0.903405435181191  
"10416","ATF4",1093.71941069451,-0.0790068644590898,0.155034565650141,-0.509608061452444,0.610326075013358,0.903405435181191  
"10417","ZNF496",50.4856358994667,0.138138571342688,0.271309722146245,0.509154519970451,0.610643919023246,0.903626381083165  
"10418","RNLS",30.2851578907113,-0.176227304563367,0.346188461305965,-0.509050197394116,0.610717039162788,0.903647836311613  
"10419","CCDC3",4.3536016260561,-0.358747025912343,0.705302841790804,-0.508642535738923,0.611002808188954,0.903897148582796  
"10420","ELANE",107.677515921798,-0.18800329740482,0.369558849868498,-0.508723569931333,0.610945998856435,0.903897148582796  
"10421","PEX5",49.8350411745396,-0.127170656386338,0.250100868477585,-0.508477468152956,0.611118536698225,0.903931425340272  
"10422","CHCHD10",139.496239258052,0.197919268668621,0.389266006771964,0.508442209762651,0.611143257534629,0.903931425340272  
"10423","SHQ1",32.2208864731393,0.161316470594725,0.317628265648286,0.50787819612173,0.611538766588371,0.90408267833123  
"10424","HMG3-AS1",35.8740842454428,0.144328301601092,0.284132012946968,0.507962126844293,0.611479903810921,0.90408267833123  
"10425","AXIN1",45.0459267878334,-0.127543497237672,0.251110325944012,-0.507918170064057,0.61151073152009,0.90408267833123  
"10426","CWC25",175.769588876507,-0.086463066674619,0.170175370163158,-0.508082142508176,0.61139573809459,0.90408267833123  
"10427","TAF4B",28.4274535311816,0.187379461931707,0.368858825966529,0.507997772428821,0.611454905403598,0.90408267833123  
"10428","AC048382.5",11.1065964816365,0.262426662820354,0.516831958081218,0.507760131154883,0.611621572837814,0.904118387542664  
"10429","PSMB2",507.532829441818,-0.128108834974026,0.253678206595768,-0.505005284818043,0.613555124118072,0.904133561211736  
"10430","ASAP2",331.009337950794,-0.138870753737908,0.274001155331768,-0.506825431337177,0.612277310670997,0.904133561211736  
"10431","LBH",63.1287088389508,-0.225962131440645,0.446829671942838,-0.505700819863081,0.613066692647144,0.904133561211736  
"10432","HEATR5B",57.1491529097934,0.142425466712369,0.281234448266539,0.506429662476433,0.612555055625491,0.904133561211736  
"10433","AC007319.1",3.07278726823643,0.479397000410454,0.948795966112186,0.505268801231149,0.613370052553842,0.904133561211736  
"10434","CUL3",236.342982327411,0.0907476914106633,0.178823319380785,0.507471238789758,0.611824211819954,0.904133561211736  
"10435","NCK1-DT",19.1146405642902,-0.177146845834578,0.34939021070158,-0.507017198561074,0.61214275119562,0.904133561211736  
"10436","EXOSC9",88.490819532707,-0.135427371949459,0.267644481261674,-0.505997251693946,0.61285857900221,0.904133561211736  
"10437","ZNF131",187.103770943341,-0.113943357294315,0.224800427724141,-0.506864503986347,0.612249893062601,0.904133561211736  
"10438","HIST1H1E",34.2202784661282,0.18603651858472,0.367160691834912



,0.506689639500868,0.612372601173305,0.904133561211736  
"10439","SLC2A12",9.79948840244705,0.267776759287197,0.528914323747499  
,0.506276247899521,0.612662734767611,0.904133561211736  
"10440","AC006483.2",2.94143860666322,-0.490522666879852,0.96944615443  
0684,-0.505982374202016,0.612869023186164,0.904133561211736  
"10441","RALA",416.57404419057,-0.0939837526372127,0.185900335940628,-  
0.50555988595539,0.613165647989451,0.904133561211736  
"10442","THAP5",124.574494695269,-0.136176513405105,0.26830458970655,-  
0.507544479779654,0.611772835273735,0.904133561211736  
"10443","CREB3L2",255.208905385054,-0.116244480300651,0.22909634178718  
9,-0.507404349601673,0.611871134419719,0.904133561211736  
"10444","AC093673.1",67.1692846069797,-0.185781587479775,0.36709887449  
2954,-0.506080515055735,0.612800128540369,0.904133561211736  
"10445","PUM3",174.0913198157,-0.116034429374645,0.22906654061575,-0.5  
06553375550769,0.612468229567387,0.904133561211736  
"10446","RIC1",86.2099222243568,0.10681448933264,0.21165584237687,0.50  
466119022809,0.613796824032869,0.904133561211736  
"10447","MRPL50",140.803263179976,-0.115095597537973,0.227351534035256  
, -0.506245088806503,0.612684605839133,0.904133561211736  
"10448","VAV2",25.487731227345,0.162464908835349,0.320232001515667,0.5  
07335019818126,0.61191977077195,0.904133561211736  
"10449","AL731559.1",2.46108188192321,0.553290545486979,1.096399511865  
3,0.504643188453875,0.61380947004668,0.904133561211736  
"10450","SPOCK2",8.27836062116747,0.286460706909855,0.567688360793218,  
0.504609089588503,0.613833424373963,0.904133561211736  
"10451","PDLIM1",1042.06040008864,0.119097456489273,0.235706204723383,  
0.505279259105809,0.613362708338499,0.904133561211736  
"10452","NUDT22",118.98001005804,-0.13408284526796,0.265628897723407,-  
0.504775069343461,0.613716828087861,0.904133561211736  
"10453","FAM118B",28.6015117371372,-0.206999792784715,0.40822413318947  
5,-0.507073874264648,0.612102985418551,0.904133561211736  
"10454","AC010809.2",3.03848029816502,0.472205223678065,0.935903269005  
891,0.504544902572718,0.613878516634211,0.904133561211736  
"10455","PPCDC",45.3112442056394,-0.175021667992876,0.346576083937308,  
-0.505002151344452,0.613557324952188,0.904133561211736  
"10456","ZSCAN2",9.53774612589218,0.234421033767562,0.463141180245223,  
0.506154589068156,0.612748131025828,0.904133561211736  
"10457","CLEC16A",35.7598763253669,0.133781148761974,0.265182626529112  
,0.504486853128319,0.613919298423824,0.904133561211736  
"10458","DHX33",58.6402604916537,0.125740573557771,0.249213951197048,0.  
504548693818311,0.613875853191523,0.904133561211736  
"10459","DDX42",299.936346017977,0.0936474062361431,0.185158218416294,  
0.505769644129942,0.613018370935141,0.904133561211736  
"10460","NOL11",132.599355239579,-0.0825003921633484,0.163373155207295  
, -0.504981323637096,0.613571953639783,0.904133561211736  
"10461","GRB2",234.905938660908,0.0931287413393014,0.184272623331772,0.  
50538565987433,0.613287988846175,0.904133561211736  
"10462","GATA6-  
AS1",3.55414648174196,-0.412600224722301,0.816867366468921,-0.50510063  
403053,0.613488156079188,0.904133561211736

"10463", "HDGFL2", 201.662774942417, -0.101212365064318, 0.19972025423207, -0.506770660058902, 0.612315745054212, 0.904133561211736  
"10464", "GEMIN7", 46.83463632072, -0.168449463844485, 0.332642190665355, -0.506398372099313, 0.61257701714215, 0.904133561211736  
"10465", "ZDHC8", 109.580058419132, -0.111063904363674, 0.219485223511353, -0.506019961557592, 0.612842636547724, 0.904133561211736  
"10466", "TMEM191C", 3.29816493193051, -0.468900373532757, 0.925682954355745, -0.506545325617562, 0.612473879119778, 0.904133561211736  
"10467", "MCTS1", 323.806993726692, -0.13446543226027, 0.26613218842163, -0.505258056373241, 0.613377598348334, 0.904133561211736  
"10468", "DLEU2L", 17.9416874054016, 0.201589996406776, 0.399711832638341, 0.504338325628639, 0.614023649687209, 0.904188907108944  
"10469", "PRIM2", 48.2970283711738, 0.137627148192625, 0.273061091216228, 0.504015960602908, 0.614250161222502, 0.904188907108944  
"10470", "AL133338.1", 5.18035522678173, -0.315332189532679, 0.625511696931101, -0.504118773605303, 0.61417791511001, 0.904188907108944  
"10471", "AC016831.6", 7.98082540846088, 0.369317941091416, 0.73260135560777, 0.504118560885037, 0.614178064583466, 0.904188907108944  
"10472", "FAM27C", 4.62190756402271, 0.411422737596464, 0.816287826286217, 0.504016750400741, 0.614249606221782, 0.904188907108944  
"10473", "PRKACA", 210.931195122577, 0.0906651089971964, 0.17991816650248, 0.503924149293434, 0.614314679672273, 0.90419753529534  
"10474", "CEP95", 152.294337928837, -0.126161233873123, 0.250468018672659, -0.503701967786972, 0.614470825363782, 0.904254679998348  
"10475", "OGFR", 154.697041800764, 0.0921362399566914, 0.182913926518931, 0.503713641219962, 0.614462621022437, 0.904254679998348  
"10476", "PPARG", 149.548603702319, -0.17636029907837, 0.350217775291442, -0.50357323791349, 0.614561302703925, 0.90430149686722  
"10477", "AARS", 115.846622699655, 0.10008562668736, 0.198785074453573, 0.503486627265544, 0.614622179994859, 0.904304753710104  
"10478", "CCDC51", 131.91205502358, 0.165202390835695, 0.328682430687452, 0.50262008373909, 0.615231406193525, 0.904380500184037  
"10479", "PSMC2", 294.612638777907, -0.10219643297727, 0.203344048477892, -0.502578923466162, 0.615260350660396, 0.904380500184037  
"10480", "GCC1", 28.1275482318197, 0.1603023243849, 0.318856548857314, 0.502741201205918, 0.6151462382079, 0.904380500184037  
"10481", "POLD4", 463.930411600646, -0.117256766525041, 0.2331472956097, -0.502929987750468, 0.615013496683521, 0.904380500184037  
"10482", "YARS2", 80.1980892321794, -0.141463170499999, 0.281094475129646, -0.503258452286383, 0.614782573383384, 0.904380500184037  
"10483", "BAG5", 202.474812985479, -0.0858318150501417, 0.170757572831495, -0.502653051497994, 0.615208223246446, 0.904380500184037  
"10484", "AC008105.3", 48.4997744932893, 0.17784491689469, 0.3536555894078, 0.502876024644467, 0.615051438487868, 0.904380500184037  
"10485", "ZNF799", 20.6772626290282, 0.170135544878357, 0.338312515878227, 0.502894622259839, 0.615038362269485, 0.904380500184037  
"10486", "AL050403.2", 23.1265832859593, 0.204417269864758, 0.406513529198863, 0.502854776488284, 0.615066378484669, 0.904380500184037  
"10487", "ACSL4", 215.926072056535, 0.116524463315341, 0.23168613110809, 0.502941038196963, 0.615005727171058, 0.904380500184037

"10488","FOX06",4.90993969820933,0.369936397743961,0.736378631805894,0.50237253196325,0.615405497015984,0.904495291994632  
"10489","CDC6",16.0636903630762,-0.205258504574182,0.4086364543553,-0.502301012027953,0.615455797452591,0.904495291994632  
"10490","MOB1B",44.6305993692362,0.141602972793334,0.282006522081137,0.502126588237534,0.615578478418303,0.904503121229448  
"10491","AC004812.2",20.9952618351234,0.258151579005797,0.514114084648273,0.502128976260998,0.615576798729544,0.904503121229448  
"10492","TMEM88",7.90367071000483,-0.37359667233798,0.744392659351219,-0.501881188166997,0.615751098740501,0.904619708191995  
"10493","GRIN2D",11.5431017946276,-0.26648780354568,0.531014106892279,-0.501846937937827,0.615775192867895,0.904619708191995  
"10494","ANKRD65",170.179230762422,0.138060236209229,0.275189752876606,0.501691050506283,0.615884860771261,0.904624791006182  
"10495","AC009093.2",7.6632076158835,0.325952051930632,0.649727276004359,0.501675185833579,0.615896022160875,0.904624791006182  
"10496","TMEM268",19.5949303285385,0.195279014423533,0.389437995741448,0.501438012107018,0.616062893323049,0.904783679551715  
"10497","AC012615.2",2.91549733906188,0.613355806033881,1.22359482719244,0.501273618033542,0.616178569678493,0.904867357492043  
"10498","DIS3L",104.186018480486,0.105086704102765,0.209701510032652,0.501125166368149,0.61628303630439,0.904887013482929  
"10499","MED11",152.981180985413,-0.144056832943064,0.287488227351316,-0.5010877637331,0.616309358064046,0.904887013482929  
"10500","HDHD2",92.1015571450528,0.11073980036786,0.221058638866084,0.500952149782057,0.616404799268933,0.904940950545771  
"10501","LANCL3",7.76672471872357,-0.380145396411265,0.759080706759055,-0.500797073389365,0.616513945528091,0.905014995744741  
"10502","MYH7B",3.83578341904386,0.397867198935133,0.794749055609411,0.500619907789699,0.616638649042677,0.905111862025601  
"10503","GINS3",10.9352308152838,-0.262642038904659,0.524859134818466,-0.500404816228453,0.616790062789873,0.905247911825753  
"10504","HCLS1",24.2449707333961,-0.226925785129625,0.454510788635194,-0.499274804479423,0.617585802391316,0.905445264815188  
"10505","DKK2",67.7768174662207,0.221285678199768,0.442765864354097,0.499780348971973,0.617229748965927,0.905445264815188  
"10506","AC016596.1",8.60319307905951,0.354262397037489,0.709653576078187,0.499204695050332,0.61763518734406,0.905445264815188  
"10507","SMIM15",276.339372790974,-0.111932176980003,0.224216314161525,-0.499215132487491,0.617627835123035,0.905445264815188  
"10508","FCHSD1",30.1390102109145,-0.167290457043155,0.335107963753908,-0.499213612142048,0.617628906065133,0.905445264815188  
"10509","MMUT",132.452060782136,0.0869690666442865,0.17409942246337,0.499536790034926,0.617401275548833,0.905445264815188  
"10510","CHN2",7.91763641146848,0.331378217130048,0.662779791622533,0.499982379243654,0.617087484821311,0.905445264815188  
"10511","PARP10",87.6264139639412,0.109767012480613,0.219916878862552,0.499129548620129,0.61768812227029,0.905445264815188  
"10512","MIGA2",28.7230150892774,0.170751664481809,0.342031488263537,0.499227908368028,0.61761883573441,0.905445264815188

"10513", "ANKLE2", 176.71615226712, -0.0912302104284592, 0.182633298698049, -0.499526707773547, 0.617408376439653, 0.905445264815188  
"10514", "TOP3A", 53.2244030206882, 0.132319136463057, 0.264964059312137, 0.499385225326655, 0.617508025655208, 0.905445264815188  
"10515", "BLVRB", 1006.95672260653, -0.154558143387156, 0.309232996315721, -0.499811291901576, 0.617207958876707, 0.905445264815188  
"10516", "RANGAP1", 56.7374126580598, -0.118198825954536, 0.236500949818093, -0.49978161206308, 0.61722885948738, 0.905445264815188  
"10517", "HGH1", 36.7095374808401, 0.155205374664601, 0.311231921809584, 0.498680770796893, 0.618004293331917, 0.905815229751003  
"10518", "THYN1", 251.376013623862, -0.150154628071468, 0.301149764416113, -0.498604501194269, 0.618058033507691, 0.905815229751003  
"10519", "TBX2", 6.80046609803414, 0.318609650378804, 0.639136870685601, 0.498499875366338, 0.618131757032629, 0.905837155115313  
"10520", "SKP1", 2103.25363038258, -0.0958477989611508, 0.192610488301414, -0.497625024506243, 0.618748362231903, 0.906230818235791  
"10521", "AL136366.1", 2.83734524026599, 0.411359564554853, 0.826395501985952, 0.497775657740506, 0.618642175007725, 0.906230818235791  
"10522", "TRIM44", 302.607271923698, 0.0964128235817834, 0.193846008904573, 0.497368112589027, 0.618929487796718, 0.906230818235791  
"10523", "PAK1", 80.3841544197961, -0.111632376494952, 0.224145807159749, -0.498034640529284, 0.618459626582161, 0.906230818235791  
"10524", "PAN3-AS1", 5.99460894093222, -0.314188720900711, 0.631518252285186, -0.497513286059113, 0.618827136150639, 0.906230818235791  
"10525", "HERC1", 186.758660714558, 0.102226856462087, 0.205532245655567, 0.497376244472118, 0.618923754380082, 0.906230818235791  
"10526", "TMC6", 7.59508239080361, 0.31382807932775, 0.630649444984982, 0.497626822354888, 0.618747094811545, 0.906230818235791  
"10527", "AC004832.6", 3.20741790586927, 0.522218286659258, 1.04980399304817, 0.497443608633039, 0.618876259901252, 0.906230818235791  
"10528", "EIF4ENIF1", 62.6051274195664, -0.114755227993102, 0.230502427294725, -0.497848241078924, 0.618591011032484, 0.906230818235791  
"10529", "GATB", 36.6406189508601, 0.137604230347659, 0.276797092168235, 0.497130332077422, 0.619097146146924, 0.90639020874298  
"10530", "VPS26C", 91.1632412694664, -0.109452509917041, 0.220227460102096, -0.496997558189606, 0.619190773254634, 0.90644119370562  
"10531", "ZNF724", 11.6977524807461, 0.235655885789094, 0.474399514648883, 0.4967456300277, 0.619368440417776, 0.906615184601654  
"10532", "GABBR1", 67.9074331802454, -0.179376698506082, 0.361287227458758, -0.496493329608665, 0.619546392392328, 0.906693845262601  
"10533", "AC092171.5", 2.58939839731474, -0.525759297199724, 1.05903060557786, -0.496453355012195, 0.619574589232516, 0.906693845262601  
"10534", "PSMB5", 704.912543355298, -0.133492412543749, 0.268918124081526, -0.496405413356516, 0.61960840652709, 0.906693845262601  
"10535", "GABPB1-IT1", 223.296765436687, 0.116552966845807, 0.234826799986251, 0.496335881818561, 0.619657454417224, 0.906693845262601  
"10536", "NUP107", 111.472413877178, -0.126565250890597, 0.255208698519984, -0.495928436705248, 0.619944902227638, 0.906862893086897

"10537", "SUGP1", 48.9563665205943, -0.130315648683205, 0.26277451006783, -0.495921954719149, 0.619949475663297, 0.906862893086897  
"10538", "AP00L", 143.532137777017, 0.10650708156323, 0.21469594555273, 0.496083339110248, 0.619835613528188, 0.906862893086897  
"10539", "ZNF451-  
AS1", 3.15106280296856, 0.497705798327948, 1.0047939318979, 0.495331214220072, 0.620366340740632, 0.906889601350563  
"10540", "KHDC1", 9.26852477172563, -0.243244963364515, 0.490772486904043, -0.495636919051811, 0.620150600207842, 0.906889601350563  
"10541", "CHST1", 2.76985223278577, 0.569956671667731, 1.15050634912873, 0.49539637230108, 0.620320354955208, 0.906889601350563  
"10542", "PPP1R14B-  
AS1", 9.03532461162522, -0.309240199404372, 0.624034310473921, -0.495549994950631, 0.620211940538391, 0.906889601350563  
"10543", "SLC25A29", 68.2381356643599, 0.151109262716508, 0.30488865190528, 0.495621144874401, 0.620161731484251, 0.906889601350563  
"10544", "AC092338.3", 24.8489653449014, 0.168323848863206, 0.339724495552846, 0.495471627941595, 0.620267244591597, 0.906889601350563  
"10545", "CMTR2", 75.8170080999156, 0.111594149489802, 0.225300495384258, 0.495312490545013, 0.620379555383827, 0.906889601350563  
"10546", "SNX17", 413.221513002856, -0.114307906174625, 0.230822005798087, -0.495221007110631, 0.620444123580741, 0.906897986440083  
"10547", "CCNL1", 2855.61156313213, 0.14057074640182, 0.284124560574264, 0.494750422553059, 0.620776304205967, 0.906957958928063  
"10548", "PAPSS1", 182.906691256752, 0.0876739720686568, 0.1772476130829, 0.494641200204209, 0.620853414159887, 0.906957958928063  
"10549", "DROSHA", 68.3263816436545, 0.103913378986647, 0.209975323596142, 0.494883766372993, 0.620682170368435, 0.906957958928063  
"10550", "AL391834.1", 3.57119157723023, -0.450369104190214, 0.910610210501039, -0.494579457814789, 0.620897005550947, 0.906957958928063  
"10551", "MRPL17", 185.557352354974, -0.129468743907577, 0.261688946114047, -0.494742883985454, 0.620781626230132, 0.906957958928063  
"10552", "SNUPN", 171.391902956035, 0.10583696456396, 0.213869004977846, 0.494868176783836, 0.620693175491124, 0.906957958928063  
"10553", "AC023043.1", 4.51778408728205, 0.384536161947154, 0.777058193018545, 0.494861472927005, 0.620697907955408, 0.906957958928063  
"10554", "CNOT10", 63.2550907356723, -0.113613441750658, 0.229865113234058, -0.494261352460965, 0.621121615537469, 0.907114135813367  
"10555", "LINC01290", 2.93058036631734, 0.500770224331505, 1.0130266260713, 0.494330762335028, 0.621072603129693, 0.907114135813367  
"10556", "LY96", 302.409777903991, -0.177069949968259, 0.358317082490261, -0.494171108833673, 0.621185341801691, 0.907121262208514  
"10557", "BEST1", 21.4010751443465, 0.198072663670331, 0.401053373462435, 0.493881056180379, 0.621390184063669, 0.907248502305499  
"10558", "C14orf132", 212.391452525671, -0.12072987464992, 0.244433279718962, -0.493917500876844, 0.621364444317394, 0.907248502305499  
"10559", "CPT1B", 4.34813755311712, -0.378364199985986, 0.766793374251067, -0.493436971016523, 0.621703864699445, 0.907620520346808  
"10560", "C8orf37", 18.8946588445689, 0.199501686842603, 0.40453716205235, 0.493160346086538, 0.62189929414206, 0.907739863559895

"10561", "HECTD2", 55.6224645868616, 0.131284561909803, 0.266213828474858, 0.493154554224075, 0.621903386250798, 0.907739863559895  
"10562", "ZNFX1", 172.505193656348, -0.118288928915647, 0.239903233376703, -0.493069339877994, 0.621963593860531, 0.907741791266814  
"10563", "PHF13", 71.2789663086278, 0.127199079248578, 0.258482668140929, 0.492099064759062, 0.622649313378723, 0.907824441767728  
"10564", "CTBS", 183.720143616952, 0.0924700941218897, 0.188033929429098, 0.491773449624991, 0.62287950776669, 0.907824441767728  
"10565", "IRS1", 119.901938269234, 0.143207491944204, 0.290803126789808, 0.492455131157218, 0.622397633615656, 0.907824441767728  
"10566", "AC007620.2", 8.34951013350402, 0.304913743664075, 0.619583951561041, 0.492126600270787, 0.622629848774765, 0.907824441767728  
"10567", "AC016949.1", 16.887838429715, 0.238122101340487, 0.485031114845856, 0.490941908780765, 0.623467534763395, 0.907824441767728  
"10568", "GZMA", 21.9122569640635, 0.220480079004056, 0.447495127620395, 0.492698278473965, 0.622225794229036, 0.907824441767728  
"10569", "AC011416.3", 3.41890620383761, -0.382165587894806, 0.778202536423275, -0.491087563979541, 0.623364516829619, 0.907824441767728  
"10570", "ATP6V0E1", 1852.08139049559, -0.116402673454184, 0.236507031806451, -0.492174260380737, 0.622596158897887, 0.907824441767728  
"10571", "CDKAL1", 60.9236395190983, 0.108958637543193, 0.221545330727068, 0.491811933862981, 0.622852299322423, 0.907824441767728  
"10572", "ATAT1", 41.3902593593867, 0.132001290903558, 0.268035245030717, 0.492477363894552, 0.622381920229002, 0.907824441767728  
"10573", "CALD1", 3931.24000185586, -0.086149242118111, 0.175374362495628, -0.491230536163793, 0.623263403684746, 0.907824441767728  
"10574", "RRM1", 114.53180036169, -0.0893552360295594, 0.181516212530039, -0.492271377768927, 0.622527511211533, 0.907824441767728  
"10575", "PUS1", 17.9768867573742, -0.209689107655764, 0.425709068471055, -0.49256434308263, 0.622320447777948, 0.907824441767728  
"10576", "BORA", 8.39550207051758, 0.251157969878214, 0.511124302724179, 0.491383345576796, 0.623155341281316, 0.907824441767728  
"10577", "GRTP1", 22.3096653193214, 0.17356945782735, 0.352453696866678, 0.492460312859213, 0.622393971339275, 0.907824441767728  
"10578", "EAPP", 434.155063750454, -0.107727963112397, 0.219456656388748, -0.490884919533114, 0.623507843702948, 0.907824441767728  
"10579", "GPR135", 13.3591604688237, 0.215373550324471, 0.438130742902705, 0.491573699890533, 0.623020739557812, 0.907824441767728  
"10580", "MRTFB", 81.1001817932781, 0.120737178352717, 0.245688584217222, 0.491423639960286, 0.623126847608884, 0.907824441767728  
"10581", "LAT", 11.2577973377021, 0.226146515123524, 0.460240920009282, 0.491365511608492, 0.623167952530439, 0.907824441767728  
"10582", "AC007906.2", 10.9907819337391, -0.321106047881625, 0.654219232488521, -0.490823308052563, 0.623551423252462, 0.907824441767728  
"10583", "RPS28", 12716.8868427141, -0.137104984299704, 0.278773909991435, -0.491814260179213, 0.622850654628032, 0.907824441767728  
"10584", "ZNF93", 18.2581923033854, 0.208605331376496, 0.424522789936111, 0.491387827277518, 0.623152172074471, 0.907824441767728  
"10585", "ZNF461", 6.36336304455837, 0.346869936605621, 0.705195729659442, 0.491877534160812, 0.622805920948929, 0.907824441767728

"10586", "SNRPA", 157.321583908202, 0.113938533881382, 0.231956193085763, 0.491207121334564, 0.623279962692483, 0.907824441767728  
"10587", "LINC01684", 13.1539719961214, 0.246073935853846, 0.500616394293377, 0.491541904457965, 0.623043221597636, 0.907824441767728  
"10588", "AF129075.2", 3.4923976974888, 0.393492732483873, 0.801429056447013, 0.490988852124167, 0.623434332217388, 0.907824441767728  
"10589", "POMP", 962.850542543791, -0.11950741479824, 0.243542530447939, -0.490704496575748, 0.623635465704405, 0.9078610542859  
"10590", "FEZ2", 393.615737493014, 0.0785732069389325, 0.160217393960227, 0.490416208857061, 0.623839409189081, 0.908003834050821  
"10591", "CMBL", 611.957065010034, -0.0970163347292686, 0.197856909403782, -0.490335844331217, 0.623896266634712, 0.908003834050821  
"10592", "ELAC1", 53.7135215580974, -0.150977585812896, 0.307918901545217, -0.49031607041741, 0.623910256909912, 0.908003834050821  
"10593", "ZNF526", 28.6074552397824, 0.189714910800168, 0.387067579922133, 0.490133818074697, 0.624039208959098, 0.908031582557581  
"10594", "COMT", 1050.1266615819, 0.13555039129775, 0.276564244813061, 0.490122616498648, 0.624047134973403, 0.908031582557581  
"10595", "FUBP1", 161.724068427125, 0.105568710593897, 0.216000072409018, 0.488743866687194, 0.625023043219602, 0.908071086505458  
"10596", "DHX30", 138.147906841309, -0.0887365977374056, 0.18154567012463, -0.48878388383754, 0.624994708958692, 0.908071086505458  
"10597", "SLC38A9", 44.3177389027695, 0.122941214013589, 0.2511438282139, 0.489525125454724, 0.624469970897798, 0.908071086505458  
"10598", "GGH", 41.0955039330741, 0.182573677846337, 0.372721841472073, 0.489838956378994, 0.624247861781319, 0.908071086505458  
"10599", "EBAG9", 180.753034804133, -0.0923182071396725, 0.188760933906507, -0.48907475307045, 0.624788774799901, 0.908071086505458  
"10600", "AC067750.1", 9.42702166686153, -0.240396960550136, 0.490979894197623, -0.48962689387312, 0.624397942090775, 0.908071086505458  
"10601", "USPL1", 48.5826198680477, 0.142674389045431, 0.291257749726894, 0.489856112598595, 0.624235720709006, 0.908071086505458  
"10602", "G2E3", 70.0042551867744, 0.107860229292369, 0.220697164349724, 0.488725034642719, 0.625036377495801, 0.908071086505458  
"10603", "MGAT2", 147.616350930125, -0.0947489586906279, 0.193727762294537, -0.489083018192172, 0.624782923557424, 0.908071086505458  
"10604", "TTC8", 61.1321221022854, -0.139586262404314, 0.285189809153109, -0.48945038681019, 0.624522871081084, 0.908071086505458  
"10605", "ZNF747", 38.0082119010964, 0.147615578419437, 0.301672365245555, 0.489324165636722, 0.624612215109602, 0.908071086505458  
"10606", "ZNF23", 42.169977916503, -0.129288998725428, 0.264473987866212, -0.488853364251576, 0.624945514463838, 0.908071086505458  
"10607", "BRIP1", 2.50189691593219, 0.472753519333438, 0.9674300380604, 0.48869465216587, 0.625075724872489, 0.908071086505458  
"10608", "AFG3L2", 151.906951351275, -0.134046373463404, 0.273986253876482, -0.489244885708154, 0.624668335205422, 0.908071086505458  
"10609", "CCDC157", 3.97963531050919, -0.361568667588651, 0.738333936783027, -0.489708856082155, 0.624339934167532, 0.908071086505458  
"10610", "RTL6", 46.1391587610651, 0.150909914124499, 0.30838058015431, 0.489362572860411, 0.624585028467878, 0.908071086505458

"10611", "TMEM47", 235.316946552563, 0.101536278948311, 0.207657634012212, 0.488960010698861, 0.62487000840482, 0.908071086505458  
"10612", "TTLL12", 31.5331123174661, 0.145884316535548, 0.298612285572827, 0.488540905996879, 0.625166758665109, 0.908117752056413  
"10613", "SUM01", 812.454326992158, -0.124235965042901, 0.254379593363448, -0.488388095130719, 0.625274972676171, 0.908189362461432  
"10614", "MAN1B1-DT", 12.5717348939352, -0.226159984583769, 0.463212966017673, -0.4882419128465, 0.625378500172259, 0.908254153020103  
"10615", "CCDC183", 11.1710884095132, -0.278137120668155, 0.569769779721592, -0.488157025112953, 0.62543862175483, 0.908255897724984  
"10616", "CRTAP", 967.265783365206, -0.0707745948487921, 0.14520764292945, -0.48740268363958, 0.625972992129499, 0.908775068155606  
"10617", "TRAPPC2", 87.5834343867923, -0.118171021336093, 0.242429150604644, -0.487445594068871, 0.625942589399556, 0.908775068155606  
"10618", "TBC1D25", 44.1713232680609, -0.124045998418573, 0.254421944491425, -0.487560138204799, 0.625861436149752, 0.908775068155606  
"10619", "AC016394.1", 13.951308795058, -0.2099175973708, 0.430869076459998, -0.487195783683234, 0.626119593003053, 0.908827138654845  
"10620", "MAP6", 6.63989671229901, 0.306639496295296, 0.629409950935394, 0.487185650369184, 0.626126773435903, 0.908827138654845  
"10621", "SERPINH1", 915.523502579916, 0.148995523167628, 0.305929698206301, 0.487025365766073, 0.626240355290524, 0.908906419056909  
"10622", "PFDN4", 266.128203171596, -0.110900105565702, 0.227761550666886, -0.486913200410633, 0.626319843863564, 0.908936207226214  
"10623", "AC108075.1", 2.54765739956831, -0.523551268262248, 1.07557452022309, -0.486764290542745, 0.626425378992587, 0.909003785858112  
"10624", "SAP30L", 184.808824345453, 0.0800484020449655, 0.164526899806226, 0.486536865030849, 0.626586574348119, 0.909010103199578  
"10625", "H2AFV", 557.941879497685, 0.103986498757218, 0.213740328563231, 0.486508556696896, 0.626606640064789, 0.909010103199578  
"10626", "UBE3C", 122.465285132106, 0.099270985606084, 0.20403890279782, 0.486529697253129, 0.626591655037695, 0.909010103199578  
"10627", "STIM2", 51.7734783458134, -0.162884584879042, 0.33488182574827, -0.486394221349839, 0.626687686879011, 0.909042127904391  
"10628", "IQCG", 33.2706644033505, 0.130989758144338, 0.269376154897335, 0.486270799263064, 0.626775179903692, 0.909083496256625  
"10629", "ELN", 1213.6952526104, -0.145771476106674, 0.299871817461122, -0.486112624190077, 0.626887316746104, 0.909160597200225  
"10630", "STON1", 18.7876506324238, 0.233794230847512, 0.481218396486663, 0.485838098780979, 0.627081959615543, 0.909186268573514  
"10631", "MTERF3", 47.3569431163598, -0.12479348877437, 0.256845042632676, -0.485870731610117, 0.62705882106222, 0.909186268573514  
"10632", "COQ7", 88.2251001284619, -0.123887135828718, 0.254971645664027, -0.485885932555664, 0.627048042842519, 0.909186268573514  
"10633", "GBP5", 7.53419843763344, 0.410446509962539, 0.845459681252909, 0.48547141757758, 0.627341982900874, 0.909273242036022  
"10634", "CAPRIN2", 70.8632873525888, 0.113431188642466, 0.233676002909898, 0.485420784461994, 0.627377891812853, 0.909273242036022  
"10635", "MED31", 141.347858591572, -0.145854969222472, 0.300469435092333,



-0.485423647758552,0.627375861144682,0.909273242036022  
"10636","GABARAP",3267.89021142328,-0.117141498335894,0.24131346773925  
8,-0.485432907799689,0.627369293883804,0.909273242036022  
"10637","SLU7",305.719555100572,-0.0761579913024162,0.156923177538619,  
-0.485320221633123,0.627449213402343,0.909291118228553  
"10638","PLXND1",168.097286191814,0.108596399311589,0.223837378691007,  
0.485157572638925,0.627564575369062,0.909372807794142  
"10639","PPM1L",69.6595139674432,-0.204666182389118,0.42211297596578,-  
0.484861148655402,0.627774843264613,0.909506504598121  
"10640","PIH1D2",13.6573680585065,0.235288205991698,0.485214976371728,  
0.484915382767249,0.62773637012165,0.909506504598121  
"10641","MIAT",9.37569516033524,0.272823832862327,0.562927148336029,0.  
484652114698632,0.627923139351353,0.9096358606429  
"10642","DDX31",16.4884895350246,0.244875403658798,0.505382590116129,0.  
.484534703901314,0.628006441316013,0.90967104800661  
"10643","ASPRV1",6.33747295499405,-0.286538166513933,0.591781807587105  
, -0.484195632309561,0.6282470363362,0.909682776448589  
"10644","LINC02268",2.87540187211016,0.527742223142402,1.0906964649690  
9,0.483858011914761,0.628486640880796,0.909682776448589  
"10645","GBA2",48.1795025680245,0.133003221319735,0.27464054259209,0.4  
84281089981961,0.628186394413621,0.909682776448589  
"10646","TMEM9B",274.281052750031,-0.0913295029384232,0.18870372102826  
1,-0.483983582521647,0.628397520577189,0.909682776448589  
"10647","AICDA",6.60659016297454,-0.275488374619462,0.569226615748237,  
-0.483969594881535,0.628407447654133,0.909682776448589  
"10648","ALOX5AP",17.8219092767611,-0.197855563060364,0.40886744081413  
9,-0.483911271257974,0.628448840857358,0.909682776448589  
"10649","TMEM161A",85.7215307852352,-0.131138506360403,0.2709428047751  
99,-0.484008078639359,0.628380135758963,0.909682776448589  
"10650","HSPB6",591.005296685191,0.142752000740238,0.294760984866316,0.  
.484297475138989,0.628174767570831,0.909682776448589  
"10651","AL139260.1",16.3868499173404,-0.214756989075133,0.44414342232  
9321,-0.483530720659635,0.62871895234441,0.909687177995434  
"10652","PHF20L1",289.373314013613,-0.0815071197977694,0.1686496984546  
85,-0.483292413473658,0.628888126013119,0.909687177995434  
"10653","OAT",439.664823917303,0.0864270016669247,0.178802671298528,0.  
483365270995458,0.628836402574337,0.909687177995434  
"10654","FEZ1",430.225392476877,0.131389299332177,0.271640778467691,0.  
483687685160291,0.628607534289706,0.909687177995434  
"10655","SRP54",198.091619203417,-0.0790613933840345,0.163624273513568  
, -0.483188659520487,0.628961786771024,0.909687177995434  
"10656","AL133445.2",2.48811089229777,0.498033633360599,1.030225394920  
69,0.483422012130597,0.628796121836875,0.909687177995434  
"10657","CDK5RAP3",211.915131565788,-0.0837842243786442,0.173368642714  
153,-0.483272078889064,0.628902562385671,0.909687177995434  
"10658","EHD2",551.165375849947,0.11540664530088,0.238822832526527,0.4  
83231205659793,0.628931580430737,0.909687177995434  
"10659","AZIN1-  
AS1",47.1091134925534,-0.134441205965545,0.278295406188286,-0.48308812  
4978198,0.629033165411159,0.909705060963788

"10660", "KIAA1191", 100.735987166964, 0.099601036275416, 0.206216387885684, 0.482992827566303, 0.629100828935369, 0.909717568296314  
"10661", "FHOD1", 36.7264855985227, -0.165295534355322, 0.34229105344545, -0.482909303913971, 0.62916013535959, 0.909717989547705  
"10662", "CEMIP2", 98.1702710561206, -0.352668503010962, 0.730524258572338, -0.48276083767592, 0.629265560525469, 0.909754037626454  
"10663", "ZNF101", 14.2115631710873, 0.211688036777722, 0.438542656187227, 0.482707973309092, 0.629303101084066, 0.909754037626454  
"10664", "RBM26-AS1", 18.8106962763831, 0.203033311302609, 0.420725259435591, 0.482579324034361, 0.629394462761112, 0.909800791772557  
"10665", "STMN3", 230.338468145833, -0.105913514937113, 0.21951429191961, -0.482490292595164, 0.62945769272388, 0.909806876074882  
"10666", "RABGEF1", 141.71770820404, 0.138350766711088, 0.286927183452123, 0.482180757663116, 0.629677544992983, 0.909954003568655  
"10667", "APEX2", 35.2164932871256, -0.132011086436664, 0.273755458491628, -0.482222663847637, 0.629647778516194, 0.909954003568655  
"10668", "GTF2B", 257.598095209293, -0.122852686267465, 0.255032078040985, -0.481714642374213, 0.630008672941546, 0.910133748665185  
"10669", "SFT2D3", 55.2792472396591, -0.13119281911835, 0.272305888199976, -0.481784731081558, 0.629958877225636, 0.910133748665185  
"10670", "CHPF2", 87.8946794635507, 0.12788359996397, 0.265636142603597, 0.481423945968105, 0.63021522109972, 0.910133748665185  
"10671", "IDI1", 163.763292300254, 0.0908365394577764, 0.188678774108152, 0.481434861378251, 0.630207464864397, 0.910133748665185  
"10672", "PDHX", 66.2215884587518, 0.105254565517554, 0.218532371585479, 0.481642901479168, 0.630059644223531, 0.910133748665185  
"10673", "PRC1", 15.5638887507939, -0.195025948356056, 0.405009603537191, -0.481534133148395, 0.630136926535912, 0.910133748665185  
"10674", "ZNF470", 14.2125803780656, 0.192528575883672, 0.399604348444107, 0.481798000030025, 0.629949450264487, 0.910133748665185  
"10675", "LSR", 11.8607161562556, -0.229247489234654, 0.47635270177129, -0.481255776197364, 0.630334723759034, 0.910221055432834  
"10676", "Clorf174", 128.405691529685, -0.11817763962644, 0.246019954071622, -0.480357945242262, 0.630972892547747, 0.910323439303263  
"10677", "MRPL37", 180.120988046808, -0.12802955968507, 0.266427156289527, -0.480542454711111, 0.630841722673546, 0.910323439303263  
"10678", "PTGFRN", 289.46261142114, -0.16637887761193, 0.346592960858488, -0.480041132975754, 0.631198145099438, 0.910323439303263  
"10679", "UBE2Q1", 269.835926721264, 0.170557765750333, 0.355364625156777, 0.47995144613814, 0.631261918389303, 0.910323439303263  
"10680", "CSNK1G3", 302.103976823156, 0.142221897413921, 0.296238670532871, 0.480092275455105, 0.631161780633863, 0.910323439303263  
"10681", "PHAX", 301.09433995421, -0.0848000431992669, 0.176415796802439, -0.480682822832646, 0.63074194117272, 0.910323439303263  
"10682", "AL662844.4", 63.7190799060517, -0.230888440635397, 0.481053104466773, -0.479964557949018, 0.631252594850811, 0.910323439303263  
"10683", "AL035530.2", 9.17200683962248, -0.223542806386164, 0.465586594411688, -0.4801315352918, 0.631133865835494, 0.910323439303263  
"10684", "AC104232.3", 3.86002603852555, 0.355426774459372, 0.738965557483

795,0.480978809986237,0.630531559039123,0.910323439303263  
"10685","AL133415.1",2.44333820144174,0.48742282630473,1.0139735383425  
9,0.480705667232162,0.630725702734551,0.910323439303263  
"10686","AD0",56.5620710230356,0.12055825425371,0.250909556448405,0.48  
0484904442052,0.630882634564759,0.910323439303263  
"10687","CCDC91",145.006640182541,0.0908553874694933,0.188986983044879  
,0.480749446367518,0.630694583798893,0.910323439303263  
"10688","SHF",32.2780164233674,-0.150133709374412,0.312690516894929,-0  
.480135153650535,0.631131293111729,0.910323439303263  
"10689","CELF6",14.218249114692,-0.239479920055189,0.498591881656476,-  
0.480312513833083,0.631005192035753,0.910323439303263  
"10690","AC008764.8",6.7129994934931,0.281367481601829,0.5862922706261  
59,0.479909928372975,0.631291441203496,0.910323439303263  
"10691","RNF2",72.6509013664928,-0.12136276736414,0.253389429676966,-0  
.47895749841996,0.631968864844658,0.910439924895199  
"10692","AC009948.2",3.34501909469841,0.44743699758761,0.9342610882203  
85,0.478920724869217,0.63199502653573,0.910439924895199  
"10693","CAVIN2",52.3522878777699,-0.167772986349257,0.350522074967121  
, -0.478637433505419,0.632196583060806,0.910439924895199  
"10694","AC007383.2",4.43540258049006,0.343398939137682,0.717343757394  
455,0.47870903677336,0.632145636088723,0.910439924895199  
"10695","TFG",563.7441802851,-0.0940860071717775,0.19641849644911,-0.4  
79007877937577,0.631933024251596,0.910439924895199  
"10696","AK6",258.84299883014,-0.131807091879487,0.275363096613178,-0.  
478666507969459,0.632175895862756,0.910439924895199  
"10697","AL499604.1",18.0035436901452,0.204076690138715,0.426373236742  
614,0.478633911682192,0.632199088944418,0.910439924895199  
"10698","RNF31",43.7789408706411,-0.12627237610954,0.263697462710319,-  
0.478853208565962,0.632043060645665,0.910439924895199  
"10699","AC020663.3",4.08559763471641,0.449790526480486,0.937782592601  
694,0.479631985098626,0.631489098677463,0.910439924895199  
"10700","SAT2",807.129170755505,-0.127075747315627,0.265255193858494,-  
0.479069779811431,0.63188898770036,0.910439924895199  
"10701","ZNF236",70.8889111135598,0.121502519679832,0.253497913306763,  
0.47930382579836,0.631722500859739,0.910439924895199  
"10702","ZNF440",12.5757282640719,-0.19639826369098,0.410139556175067,  
-0.478857161505163,0.632040248305581,0.910439924895199  
"10703","NFKBIB",55.660892280675,-0.133655688241084,0.279040632301868,  
-0.47898288911736,0.631950801489902,0.910439924895199  
"10704","ZNF525",14.7167110065458,0.238033596481781,0.496577746376589,  
0.479348094469912,0.63169101277545,0.910439924895199  
"10705","NMRAL1",109.809780971474,0.137214413435939,0.286748943678364,  
0.478517589902084,0.632281857778413,0.910474062368448  
"10706","BID",69.3022017747904,-0.140689079609078,0.294081279246999,-0  
.478402025349302,0.63236409236916,0.910507424235998  
"10707","AL513477.2",6.30060990723577,0.315385783172645,0.659371247289  
336,0.478312914718667,0.632427505715613,0.910513682694142  
"10708","BOLA1",116.539352815692,0.13690724624575,0.28652429378375,0.4  
7782072660505,0.632777807731604,0.91052027243756  
"10709","ARL8B",226.924242264514,0.0765484327407302,0.160169679577593,

0.477920870807805,0.632706526035935,0.91052027243756  
"10710","OMD",653.723105944966,-0.0620294094133458,0.129751778627714,-  
0.478062112669159,0.632605997214859,0.91052027243756  
"10711","SLC15A4",159.70434659332,0.0951416218405271,0.198971945217801  
,0.478166013486885,0.632532050195163,0.91052027243756  
"10712","AC007952.4",181.698872652379,-0.173650816095396,0.36343180031  
0536,-0.477808535045694,0.632786485801076,0.91052027243756  
"10713","SRXN1",30.8302501513378,-0.135179133943331,0.282819320143223,  
-0.477969941639329,0.632671599127857,0.91052027243756  
"10714","CENPS",41.9226988280906,-0.157795128887248,0.330673686256232,  
-0.477192880612144,0.633224780272559,0.910562482162359  
"10715","SPEN",233.14536219777,0.13199503012407,0.278006948845688,0.47  
4790398844801,0.634936377034283,0.910562482162359  
"10716","ZSCAN20",9.57961468881851,0.248418940319692,0.521173935010279  
,0.476652655921469,0.633609481161839,0.910562482162359  
"10717","SFPQ",1080.07411400614,0.127508713684104,0.268773270950818,0.  
47440994870147,0.635207599968876,0.910562482162359  
"10718","MIER1",462.406514466008,-0.0696376684494758,0.147653549480572  
, -0.471628814169743,0.637191756056501,0.910562482162359  
"10719","AGL",216.989164549543,-0.1068008227172,0.225804955911878,-0.4  
72978204955253,0.636228728732311,0.910562482162359  
"10720","AL445426.1",71.0156833477941,0.142235007483918,0.298848772536  
503,0.475943087457537,0.634114924422325,0.910562482162359  
"10721","KCNT2",51.4445729987471,0.209369847971043,0.441521507183829,0.  
47420079104747,0.635356729333312,0.910562482162359  
"10722","KIF21B",2.81526429627762,0.417506766197694,0.874134523322509,  
0.477623014602818,0.632918547277631,0.910562482162359  
"10723","EIF2D",164.277334574811,-0.0888029124111139,0.186119959296997  
, -0.477127293314138,0.633271480536765,0.910562482162359  
"10724","MTIF2",84.0517347682608,-0.124483802726743,0.262226872544652,  
-0.474717947549583,0.63498802379258,0.910562482162359  
"10725","MDH1",526.517501560656,-0.131906466755144,0.279787471180288,-  
0.471452371325616,0.637317724367544,0.910562482162359  
"10726","STEAP3",5.7328846950801,0.381520438021831,0.802007675076154,0.  
475706716878494,0.634283334981106,0.910562482162359  
"10727","AC108047.1",6.05532720879146,-0.346323648671645,0.73166071796  
076,-0.473339131335215,0.63597124846524,0.910562482162359  
"10728","MLPH",7.59343002536814,0.289849725308021,0.611970559019937,0.  
473633446962239,0.635761320013987,0.910562482162359  
"10729","RYK",242.713534300707,-0.0963992193192846,0.203084054668593,-  
0.474676455897022,0.635017601832593,0.910562482162359  
"10730","NAAA",184.240937249935,-0.122443233930272,0.256734348965754,-  
0.476925796737099,0.633414961716878,0.910562482162359  
"10731","FBXW7",126.142189136381,-0.106059648588953,0.222481423438128,  
-0.476712378723378,0.633566946920714,0.910562482162359  
"10732","OXCT1",59.0640879135928,-0.134099441609549,0.284270056483602,  
-0.471732560468552,0.637117693077712,0.910562482162359  
"10733","RAD17",90.2963917653133,0.0993332772825429,0.210533754626981,  
0.471816395705949,0.637057846964896,0.910562482162359  
"10734","HSPA4",167.459279603412,0.0820066923149617,0.172982862539679,

0.474074085206855,0.635447077766561,0.910562482162359  
"10735","LMAN2",665.468810962629,-0.101930123525332,0.214092717640381,  
-0.476102712174206,0.634001204877369,0.910562482162359  
"10736","AL031775.1",4.28164773934444,0.409505231709626,0.861308367086  
325,0.475445551626207,0.634469433400987,0.910562482162359  
"10737","LINC00240",3.00637829841157,0.399930020143998,0.8431996138490  
77,0.474300525730056,0.635285616679751,0.910562482162359  
"10738","HLA-  
DRB5",47.7477629561933,0.785225154811772,1.65912965343269,0.4732753423  
98448,0.636016751478415,0.910562482162359  
"10739","AL390208.1",4.48155371393531,0.362415441181973,0.767622594424  
388,0.472127115348571,0.636836059177921,0.910562482162359  
"10740","SAMD3",4.68612025138013,-0.375804792655661,0.796069014433202,  
-0.472075643998319,0.636872796534876,0.910562482162359  
"10741","RBAKDN",3.39809152056276,0.391838510948438,0.828508231850374,  
0.472944620083393,0.636252689986614,0.910562482162359  
"10742","MPP6",37.3045685332905,0.167637458891696,0.355092509992029,0.  
472095170059935,0.636858859824431,0.910562482162359  
"10743","ZNF394",102.825701897595,-0.0937217516955595,0.19728112067213  
5,-0.475067007812253,0.634739213235876,0.910562482162359  
"10744","LONRF1",101.699410987954,0.109580380557127,0.231869153280681,  
0.472595767943649,0.636501602374662,0.910562482162359  
"10745","EIF4EBP1",154.425185503628,0.146322994312608,0.30936406879238  
,0.472979925832333,0.636227500976277,0.910562482162359  
"10746","AC064807.1",22.2243829204287,-0.152056336068145,0.32016316276  
5858,-0.474933889191204,0.634834095476665,0.910562482162359  
"10747","YTHDF3-  
AS1",16.0008155288796,0.222998807334261,0.470549968730859,0.4739110023  
44173,0.635563373062651,0.910562482162359  
"10748","AC016877.3",6.13071916194148,-0.303708606777409,0.64329296647  
3828,-0.472115540827641,0.636844320342634,0.910562482162359  
"10749","TONSL",5.36123179410022,-0.328530321384939,0.691471824774353,  
-0.475117437347715,0.634703270415178,0.910562482162359  
"10750","TBC1D2",12.6563783831248,-0.212899402905982,0.451019862244947  
, -0.472039971468833,0.636898258105238,0.910562482162359  
"10751","TMEM141",200.175505949719,-0.133876434925419,0.28057756227709  
8,-0.477145905178272,0.63325822814278,0.910562482162359  
"10752","CDNF",10.7174330694622,-0.230634838155981,0.484316648722578,-  
0.476206710556611,0.633927119191709,0.910562482162359  
"10753","SGMS1-  
AS1",20.2266344683722,0.171637502545353,0.360390029962169,0.4762548580  
03064,0.633892821472006,0.910562482162359  
"10754","TCTN3",139.552532239342,0.088569612538066,0.186240855169661,0.  
.475564893950799,0.634384390820405,0.910562482162359  
"10755","R3HCC1L",64.9967042333909,0.132819086357973,0.279289954725773  
,0.475559840626506,0.634387991689269,0.910562482162359  
"10756","EN04",7.22696446296819,-0.268859745112915,0.56414544944654,-0.  
.476578771266669,0.633662103069904,0.910562482162359  
"10757","LINC00900",10.1967105252324,-0.244429262656511,0.513146708929  
969,-0.476334074452516,0.633836393532891,0.910562482162359

"10758", "CCDC15", 22.1434036887905, -0.168816538164208, 0.357269744596065, -0.472518428211923, 0.636556791247784, 0.910562482162359  
"10759", "AC007406.5", 14.621835639868, 0.199832158634787, 0.422206036412107, 0.47330483555601, 0.635995712745096, 0.910562482162359  
"10760", "WNT5B", 33.9656490698229, 0.186270529136946, 0.391771525107994, 0.475457038603303, 0.634461247644358, 0.910562482162359  
"10761", "PHC1", 91.4027056986763, 0.123986820832874, 0.261562685705883, 0.474023351221786, 0.635483255490066, 0.910562482162359  
"10762", "PPP1R12A", 573.442354766075, -0.0838360485643822, 0.177813933059724, -0.471481886271664, 0.637296651953342, 0.910562482162359  
"10763", "MYCBP2-AS1", 3.40437586656806, -0.365209406214685, 0.770899796701775, -0.473744328091926, 0.635682238686117, 0.910562482162359  
"10764", "TRAC", 238.58862679099, 0.337716972656115, 0.711578917978839, 0.47460227407434, 0.635070485075879, 0.910562482162359  
"10765", "SEC23A", 326.981887453324, -0.0720086453791426, 0.15132882666911, -0.475842223614106, 0.634186786109478, 0.910562482162359  
"10766", "RCOR1", 120.297748825147, 0.116726867548593, 0.246062137825546, 0.474379636705222, 0.635229211499287, 0.910562482162359  
"10767", "MAPK6", 184.970266402503, -0.113043759194883, 0.239275567868935, -0.472441713133052, 0.636611536367279, 0.910562482162359  
"10768", "AC103740.1", 8.24325060205261, 0.294280356909309, 0.622849488234013, 0.472474269415702, 0.636588303435719, 0.910562482162359  
"10769", "IQCH", 2.97913672591785, -0.377060189757583, 0.797263356543826, -0.472943082938312, 0.636253786677715, 0.910562482162359  
"10770", "AC026471.1", 12.5239211823365, 0.260449753147869, 0.550568931291374, 0.473055667229492, 0.63617346443012, 0.910562482162359  
"10771", "ACSF3", 65.9504203631192, 0.115799828049426, 0.245525211442029, 0.471641292433088, 0.637182847813448, 0.910562482162359  
"10772", "SUZ12", 165.880601101651, -0.0843231765554462, 0.17793518206767, -0.473898279000143, 0.635572446528033, 0.910562482162359  
"10773", "MRPL45", 132.704334477331, -0.108852824189403, 0.22882106432958, -0.475711554390021, 0.634279888135493, 0.910562482162359  
"10774", "TMEM99", 116.984514422933, 0.164990492738799, 0.348817393954408, 0.472999614120058, 0.636213454481069, 0.910562482162359  
"10775", "KLHL11", 10.5970708843143, -0.245772984734126, 0.514696058119275, -0.477510913202235, 0.632998351576097, 0.910562482162359  
"10776", "WIPI1", 228.559977136004, -0.0909035635068603, 0.192621298635849, -0.471928930760216, 0.636977517096782, 0.910562482162359  
"10777", "AC145207.5", 9.84710195869794, -0.248136591007876, 0.524964710007255, -0.472672898344818, 0.636446564886726, 0.910562482162359  
"10778", "PRELID3A", 9.53174284756708, -0.239338870832589, 0.50646122071959, -0.472570970967, 0.636519297034026, 0.910562482162359  
"10779", "LMAN1", 732.273079269222, -0.0713967886858308, 0.149501728332022, -0.477564971872892, 0.63295986700715, 0.910562482162359  
"10780", "SAFB2", 204.645955001297, 0.123069329336006, 0.258459214287053, 0.476165377487069, 0.633956563333445, 0.910562482162359  
"10781", "SCN1B", 140.103872495845, 0.128759866742971, 0.271567633080367, 0.47413554142097, 0.635403255330903, 0.910562482162359  
"10782", "AC010632.2", 5.58564183525899, 0.355677697912505, 0.753532127734

49,0.472013978994974,0.636916810723844,0.910562482162359  
"10783","AC008532.1",2.8592558295727,0.418437349815083,0.8853471572745  
93,0.472625168982503,0.636480622611193,0.910562482162359  
"10784","CU638689.4",13.5153113478775,0.263214685092392,0.553028860458  
516,0.47595108304865,0.63410922801255,0.910562482162359  
"10785","DNAJC28",3.18838737312966,0.39380275672802,0.829610141478825,  
0.474684116115125,0.635012141070177,0.910562482162359  
"10786","HIRA",41.6853080642592,-0.125775463199695,0.265541531856797,-  
0.473656464660015,0.635744903262202,0.910562482162359  
"10787","APOL2",142.151896497796,0.131288148703916,0.277168358935629,0  
.473676538000526,0.635730586639884,0.910562482162359  
"10788","PNPLA4",56.8276202833425,-0.129485793855425,0.274103953883819  
, -0.472396665647183,0.636643683905528,0.910562482162359  
"10789","HUWE1",247.909530629055,0.0872516049133875,0.185095376648243,  
0.471387273379612,0.637364202564505,0.910562482162359  
"10790","SMIM10L2B",2.63494160886598,-0.424997184830833,0.894113372783  
284,-0.475328071101162,0.634553153988258,0.910562482162359  
"10791","VAPB",157.752729770929,0.0831185351280739,0.176361257411128,0  
.471297020378521,0.637428643159213,0.910570154230309  
"10792","MAP3K21",5.95784279901215,-0.277266880005836,0.58879941364739  
7,-0.470902099389449,0.63771064876851,0.910596394274317  
"10793","NSUN2",50.4838388839892,-0.105296539580713,0.223643395297618,  
-0.470823381305707,0.637766866133613,0.910596394274317  
"10794","C5orf22",31.8936204248423,-0.163515903529622,0.34773548521890  
6,-0.470230708340524,0.638190196778783,0.910596394274317  
"10795","CAMK4",2.64896945846178,0.414752115379809,0.882083350482793,0  
.470196059309816,0.638214949318178,0.910596394274317  
"10796","C5orf63",13.7565446842122,-0.219613481014034,0.46687872770585  
5,-0.470386565036212,0.638078861018015,0.910596394274317  
"10797","DGAT1",79.459446600227,-0.11307067033505,0.240140419370359,-0  
.47085230646102,0.637746208681069,0.910596394274317  
"10798","PAOX",30.6583374476007,-0.134936880677194,0.286471230038738,-  
0.471031177053791,0.637618471078076,0.910596394274317  
"10799","MAML2",255.376055065653,-0.122864625074106,0.261031177933218,  
-0.470689463407853,0.637862509826266,0.910596394274317  
"10800","ADGRG1",3.18743302519966,0.45011274906942,0.9566511744401,0.4  
70508750833717,0.63799158366932,0.910596394274317  
"10801","RHBDF2",3.10955488353905,-0.455847148620288,0.968329554116155  
, -0.470756207618142,0.637814840591824,0.910596394274317  
"10802","GNG7",3.20376138548038,0.379947948133671,0.807783475049694,0.  
470358654106284,0.638098798506784,0.910596394274317  
"10803","PLIN3",372.176273533416,-0.0950164826708889,0.202057311304518  
, -0.470245209428185,0.638179837626204,0.910596394274317  
"10804","CEP89",122.324042273886,0.0883474440850043,0.187711231856247,  
0.470656141411199,0.637886309216096,0.910596394274317  
"10805","RNPS1",365.80360467417,-0.0741119676427804,0.157744119056292,  
-0.469823966092411,0.638480790307132,0.910891382006889  
"10806","GAL3ST4",53.3798243367781,0.130195369294224,0.277459515099003  
, 0.469240960245201,0.638897410702835,0.911232752219116  
"10807","AP000873.2",47.5703001191272,-0.168707980056139,0.35947841087

904,-0.469313246499542,0.638845748204964,0.911232752219116  
"10808","CDK5RAP1",59.697696398206,-0.122603062745545,0.26121860462375  
9,-0.469350423650467,0.6388191786287,0.911232752219116  
"10809","ACTR8",52.03805520445,-0.130570289109569,0.278353063790306,-0  
.469081558979829,0.63901133990336,0.911247460225674  
"10810","AC008124.1",98.3942865935867,-0.0955909987513007,0.2037922041  
75438,-0.469061116140681,0.639025951673016,0.911247460225674  
"10811","TGOLN2",829.021705382312,0.0750193676404969,0.160018826997774  
,0.46881588278072,0.639201246141018,0.911311556891839  
"10812","TWISTNB",179.6123708892,-0.116714675481973,0.248940977862701,  
-0.468844769888967,0.63918059639285,0.911311556891839  
"10813","AL391121.1",38.7844947541372,0.21124635277858,0.4506587687412  
72,0.46875012189069,0.639248255898246,0.911311556891839  
"10814","ABCC5",84.1568227495577,0.114948610259984,0.245364212855475,0  
.468481564292717,0.639440251727536,0.911431076438024  
"10815","MAPRE1",211.679188090674,-0.0842532159913641,0.17984860399502  
9,-0.468467444949936,0.639450346524634,0.911431076438024  
"10816","LDOC1",46.8366873418791,-0.146427059724315,0.312654637684573,  
-0.468334840028953,0.639545157295562,0.911481934144886  
"10817","MOB3C",66.5754089325981,0.119685499981737,0.255672502352851,0  
.468120344895598,0.639698530954065,0.911531970295518  
"10818","FGD5-  
AS1",525.383930693278,0.0636413622244306,0.135947489718732,0.468131940  
914108,0.639690238885928,0.911531970295518  
"10819","ZNF654",64.875356200745,0.107869734122783,0.230661440453856,0  
.467653951655447,0.640032076221231,0.911689158370289  
"10820","PLOC2",107.666825469183,0.122468619501421,0.262194492777661,0  
.467090739412569,0.640434959433871,0.911689158370289  
"10821","LMLN",45.618222305218,0.1320818947031,0.282532508396665,0.467  
492733677436,0.640147389614544,0.911689158370289  
"10822","WRNIP1",81.6561309676907,-0.0931793781962366,0.19947698214134  
1,-0.467118447431763,0.640415136547062,0.911689158370289  
"10823","TECPR1",30.376443487229,0.164890393635859,0.352828914010288,0  
.467338098121546,0.64025800300548,0.911689158370289  
"10824","AC083862.3",29.2686486954383,-0.188945185366018,0.40455497770  
6917,-0.467044519973503,0.640468026342088,0.911689158370289  
"10825","MRPL16",213.071278094314,-0.126442400738135,0.270365253540948  
, -0.46767252478686,0.64001879208998,0.911689158370289  
"10826","JAM3",209.257844113734,-0.0914390546965372,0.195650099759272,  
-0.467360123041306,0.640242247724956,0.911689158370289  
"10827","NUP58",98.7088245215471,0.109172645191562,0.233588970813435,0  
.467370718794581,0.64023466822889,0.911689158370289  
"10828","KLHDC2",340.015895933822,-0.0842987074539089,0.18043163825048  
, -0.467205797560201,0.640352646148014,0.911689158370289  
"10829","KATNBL1",227.316144247577,-0.07341525335062,0.157214899925141  
, -0.466973889787655,0.640518558880975,0.911689158370289  
"10830","DGKE",17.8460850339876,-0.223054863080257,0.477489170119937,-  
0.467141198247971,0.640398860337043,0.911689158370289  
"10831","SLC16A8",17.4054754199066,-0.202842172088402,0.43447581174047  
4,-0.466866432163007,0.640595442897636,0.911714407927897



"10832", "Clorf109", 50.8297946488045, 0.117314066692368, 0.251440768592404, 0.466567404121085, 0.640809412435463, 0.911934738985659  
"10833", "FBX030", 62.939796698867, 0.119937359849359, 0.257111737270824, 0.466479520236858, 0.640872303432524, 0.911940049608821  
"10834", "AC104794.3", 66.6567106034951, 0.128060644718007, 0.27463893838193, 0.466287284215749, 0.64100987933749, 0.911967447160813  
"10835", "SNRPC", 294.313965203278, -0.130050870607542, 0.27890506335176, -0.466290819695587, 0.641007349019616, 0.911967447160813  
"10836", "POMGNT1", 62.3591350759259, -0.0959971680190795, 0.205974313221585, -0.466063784933254, 0.641169844656403, 0.911999451220559  
"10837", "TOMM40L", 19.5840668798269, 0.185446320838203, 0.397831664692877, 0.466142686207158, 0.641113370681685, 0.911999451220559  
"10838", "AC093772.1", 9.96905649143449, -0.285077330051084, 0.611743589567767, -0.466007874724945, 0.641209863920105, 0.911999451220559  
"10839", "TRAPPC1", 531.288225115329, -0.130639903437902, 0.28043839289382, -0.465841720492832, 0.64132879951819, 0.912084458397722  
"10840", "TMCC1-AS1", 4.35382896864473, 0.364868680755783, 0.7834903786076, 0.465696440847454, 0.641432800329723, 0.912148211907997  
"10841", "GYPC", 1768.6349082164, -0.106221917024126, 0.228166423316008, -0.465545786625274, 0.641540656051814, 0.91221743501879  
"10842", "LINC02609", 113.032629260161, 0.119355050346644, 0.256923648521088, 0.464554551648629, 0.642250485269213, 0.912248073333716  
"10843", "RNF187", 405.284102911209, -0.102747728307148, 0.221090466077066, -0.464731610232949, 0.642123668572274, 0.912248073333716  
"10844", "USP39", 71.8832184277337, 0.107903339011459, 0.231880365826408, 0.46534055881315, 0.64168759403479, 0.912248073333716  
"10845", "EIF2AK3-DT", 7.14139566176937, 0.267006065921654, 0.573956355483379, 0.465202734268504, 0.641786280840308, 0.912248073333716  
"10846", "PPIG", 795.714273046763, 0.0814731380675053, 0.175402437447334, 0.464492621956683, 0.642294844344055, 0.912248073333716  
"10847", "NMD3", 166.759803481305, -0.0827201724547125, 0.178161392304785, -0.464299090754754, 0.642433475332024, 0.912248073333716  
"10848", "MARCH1", 5.47990325509235, -0.443647857282311, 0.95390490075336, -0.465086044669583, 0.641869839291737, 0.912248073333716  
"10849", "ANXA2R", 49.9425871364144, -0.16436173888148, 0.353479060600093, -0.464982957130321, 0.641943661427299, 0.912248073333716  
"10850", "AL354740.1", 37.0229010422092, -0.165384034924588, 0.356421527193524, -0.464012474854783, 0.642638807980822, 0.912248073333716  
"10851", "ZDHHC14", 136.540301368615, 0.138137747290191, 0.297635978558269, 0.464116428260193, 0.642564332234977, 0.912248073333716  
"10852", "NOXA1", 4.81343383916898, -0.304763379492547, 0.656258989150495, -0.464394979011339, 0.642364786743312, 0.912248073333716  
"10853", "SMARCC2", 328.513581057183, 0.0878663310415608, 0.189054387035619, 0.46476747997922, 0.642097978444227, 0.912248073333716  
"10854", "GIHCG", 105.319940347072, 0.122578924934277, 0.263837892367752, 0.464599394098477, 0.642218366261436, 0.912248073333716  
"10855", "RILP", 104.654644942134, -0.153359975377783, 0.33055583139341, -0.463945756852378, 0.642686608913666, 0.912248073333716

"10856", "METRNL", 1600.41270929718, 0.123180197431856, 0.265441287870947, 0.464058166760191, 0.642606072307339, 0.912248073333716  
"10857", "ZNF555", 21.7260574496391, -0.175087620221723, 0.376356708418603, -0.465217216287751, 0.641775910951344, 0.912248073333716  
"10858", "PSENE", 328.528561034163, -0.136091923825028, 0.292738356265834, -0.464892696539717, 0.642008300947621, 0.912248073333716  
"10859", "ITPA", 284.421541769675, -0.122445099172458, 0.263275399189372, -0.465083709110188, 0.641871511772661, 0.912248073333716  
"10860", "TMEM185A", 124.13793574049, 0.100464817746365, 0.216514653750307, 0.464009322261509, 0.642641066661713, 0.912248073333716  
"10861", "SNAPC1", 110.004842427138, -0.105007804243057, 0.22644407119343, -0.463725120687124, 0.642844696942504, 0.912304456211443  
"10862", "F8", 24.2369304658086, 0.175570236869649, 0.37856027041986, 0.463784106755114, 0.64280243124782, 0.912304456211443  
"10863", "LINC01366", 4.42455122538371, 0.382706002151835, 0.82545142497152, 0.463632372026057, 0.642911157119267, 0.912314782932293  
"10864", "SPAG8", 11.9576639356838, 0.219279350612095, 0.473154608589703, 0.463441223294187, 0.643048136072867, 0.912341188915163  
"10865", "TMEM91", 141.084661538665, 0.107750709472731, 0.232462234251211, 0.463519202677412, 0.642992253858133, 0.912341188915163  
"10866", "AL109627.1", 2.66039083520287, 0.440153067702489, 0.953734060880993, 0.461505031387792, 0.64443631246399, 0.912420533909187  
"10867", "Clorf50", 114.376821613167, -0.112512319643629, 0.244044311597182, -0.461032338378538, 0.644775404101815, 0.912420533909187  
"10868", "PTCH2", 57.6734079379548, -0.130458869010631, 0.282234098938204, -0.462236382851796, 0.643911815049741, 0.912420533909187  
"10869", "MSH6", 102.998946478648, 0.0980826829010561, 0.212659277724422, 0.461219862827514, 0.644640872485452, 0.912420533909187  
"10870", "AC012306.3", 5.87099257364206, -0.272118209171539, 0.589515701140125, -0.461596202858145, 0.644370918093014, 0.912420533909187  
"10871", "MTX2", 193.902013146263, 0.133937855776253, 0.291283112290854, 0.459820189103555, 0.645645290607727, 0.912420533909187  
"10872", "AC009950.1", 23.0078988714372, 0.229135874711342, 0.496267742048992, 0.461718252661931, 0.644283379992058, 0.912420533909187  
"10873", "NR1D2", 224.52815876399, -0.373273244561358, 0.80715945203638, -0.462452918837323, 0.643756557692974, 0.912420533909187  
"10874", "AC092053.3", 8.08613124737415, 0.304839079586296, 0.660096301327138, 0.461810010105208, 0.644217571808562, 0.912420533909187  
"10875", "ARMC8", 116.532967766957, -0.0979568267898321, 0.213111881331958, -0.459649767894675, 0.645767630551361, 0.912420533909187  
"10876", "SMIM14", 1199.34119386716, 0.0989677053128286, 0.214944046893135, 0.460434735194285, 0.645204207228689, 0.912420533909187  
"10877", "HHIP", 5.57419264735209, -0.424225563483011, 0.922243024876685, -0.459993246942405, 0.645521067721835, 0.912420533909187  
"10878", "BNIP1", 56.6074008955697, -0.148087933714122, 0.320186038317119, -0.4625059059179, 0.64371856806536, 0.912420533909187  
"10879", "RUFY1", 170.296660516095, -0.0800716031034783, 0.172998247852281, -0.462846324153813, 0.643474523948165, 0.912420533909187  
"10880", "MGAT1", 534.345467222993, 0.0893915879906589, 0.194461327536724, 0.459688253304645, 0.645740002266679, 0.912420533909187

"10881", "SERPINB1", 518.485455306882, -0.0908136887148549, 0.196715130658374, -0.461650755643027, 0.644331790446393, 0.912420533909187  
"10882", "SERPINB9", 39.58257611364, 0.187773258615866, 0.40563140486754, 0.46291597830593, 0.643424593975373, 0.912420533909187  
"10883", "PPP1R3G", 32.3611504953764, -0.161115307998686, 0.349605949734434, -0.460848301126086, 0.644907445283073, 0.912420533909187  
"10884", "IER3-AS1", 8.0552611425874, -0.26299132523238, 0.570143949660687, -0.461271798795542, 0.644603615242604, 0.912420533909187  
"10885", "RBM48", 65.1978392671791, 0.111975237545729, 0.243531776565434, 0.459797235190137, 0.645661767930575, 0.912420533909187  
"10886", "DOCK5", 8.30003491128651, 0.322510515646522, 0.701075500274838, 0.460022516148533, 0.645500058930193, 0.912420533909187  
"10887", "AL162253.2", 33.4911777043717, 0.173764944071318, 0.377660191186143, 0.460109241393865, 0.64543781111967, 0.912420533909187  
"10888", "PDCD1LG2", 51.7087273494824, 0.147819241154985, 0.320685708777502, 0.460947392131979, 0.644836349081344, 0.912420533909187  
"10889", "RANBP6", 54.8920381722674, 0.123235328512073, 0.266643791760601, 0.462172127460281, 0.643957889468823, 0.912420533909187  
"10890", "SLK", 421.652625909982, -0.0938371887440994, 0.202599416159281, -0.463166136028377, 0.643245287455348, 0.912420533909187  
"10891", "C11orf49", 96.5096368985963, -0.0963890803038645, 0.208228562056056, -0.46290037904558, 0.643435775805558, 0.912420533909187  
"10892", "ZBTB3", 11.8523534555863, 0.243951126533192, 0.529004627958637, 0.461151214261714, 0.644690120193883, 0.912420533909187  
"10893", "AP003486.1", 17.4960608142858, 0.169830410686714, 0.368211663286442, 0.461230394417458, 0.644633317379314, 0.912420533909187  
"10894", "IFNG", 5.27526802409655, -0.366214334580557, 0.79612324778566, -0.459997036387452, 0.645518347725685, 0.912420533909187  
"10895", "CEP83", 71.4611593575234, 0.117957633933846, 0.255620553207485, 0.461455984089434, 0.644471493656036, 0.912420533909187  
"10896", "FAM155A", 11.0922145856563, -0.261222999018693, 0.568001146751006, -0.459898717657352, 0.645588920692963, 0.912420533909187  
"10897", "LINC00645", 22.1265634142067, -0.268976127288272, 0.583387522221073, -0.461059102300005, 0.644756202727876, 0.912420533909187  
"10898", "TUBGCP5", 58.5320921526175, -0.12023045745213, 0.260615508386666, -0.461332705012123, 0.644559924160456, 0.912420533909187  
"10899", "AC022306.2", 8.55527030126075, 0.234434304047407, 0.508777285503345, 0.460779816094729, 0.644956584088143, 0.912420533909187  
"10900", "AQP9", 2.60992446574485, -0.469455179113611, 1.02113515422099, -0.459738534290059, 0.645703906794715, 0.912420533909187  
"10901", "FBXL8", 41.088483027342, -0.155368208039366, 0.33757715297781, -0.460245033376353, 0.645340350214778, 0.912420533909187  
"10902", "ATXN7L3", 54.6132290048784, 0.109970846379988, 0.237783355823805, 0.462483364317034, 0.643734729382129, 0.912420533909187  
"10903", "STRADA", 70.0565103219751, 0.109146900359065, 0.236449286458445, 0.461608076699556, 0.64436240157001, 0.912420533909187  
"10904", "RNF213-AS1", 15.3306633153828, 0.252485849400258, 0.546146539258658, 0.462304219199089, 0.643863174386238, 0.912420533909187

"10905", "MALT1", 118.457675917625, 0.120491340051634, 0.260163256250956, 0.463137422970318, 0.643265867170018, 0.912420533909187  
"10906", "ARHGEF18", 45.4171058226978, 0.136084580194569, 0.294664671182276, 0.461828625904016, 0.644204220949599, 0.912420533909187  
"10907", "ZNF567", 52.4566868479428, -0.101862542343952, 0.221165354891701, -0.460571875707348, 0.645105793231423, 0.912420533909187  
"10908", "LENG9", 53.3451434146716, -0.0997035462208051, 0.216783423063266, -0.459922372347205, 0.645571941117297, 0.912420533909187  
"10909", "ESF1", 249.784040396228, -0.101740180234378, 0.220362610675742, -0.46169438600492, 0.644300497549118, 0.912420533909187  
"10910", "NXT2", 38.1482387170972, -0.124365882025576, 0.269334763942624, -0.461752059797487, 0.644259133283918, 0.912420533909187  
"10911", "TMEM240", 50.0957274971893, 0.137633903781539, 0.299597788663253, 0.459395592990304, 0.645950112403591, 0.912438280160315  
"10912", "MSH5", 4.07816738158561, 0.336217455099389, 0.731886115765744, 0.459384934154158, 0.645957765253942, 0.912438280160315  
"10913", "FKBPL", 27.832504345615, -0.197173854353095, 0.42912872725066, -0.459474842470575, 0.645893213894294, 0.912438280160315  
"10914", "DFFB", 17.815507326088, 0.19185077901781, 0.41877974617759, 0.458118571322818, 0.646867257222727, 0.912461556119008  
"10915", "PATJ", 16.1832120745524, -0.214528413263738, 0.469195987229613, -0.457225592508644, 0.647508905058049, 0.912461556119008  
"10916", "KCNC4", 11.033044236652, 0.235705543307338, 0.515549978503201, 0.457192421948428, 0.647532744736426, 0.912461556119008  
"10917", "FOXN2", 85.5958195431365, -0.109479324365661, 0.239275664807994, -0.457544750543322, 0.647279544688439, 0.912461556119008  
"10918", "SMYD5", 34.9328590108151, 0.135357852886843, 0.295754084592192, 0.457670273847562, 0.647189347544609, 0.912461556119008  
"10919", "EEFSEC", 58.9861140679775, -0.101070838742333, 0.220184093220332, -0.459028793879285, 0.646213489028165, 0.912461556119008  
"10920", "SMIM3", 105.74032921113, -0.137038004239696, 0.298503206866515, -0.459083859360268, 0.646173946951691, 0.912461556119008  
"10921", "CPQ", 1307.24047387999, -0.0925268175936513, 0.20206089124158, -0.457915517570533, 0.647013137982345, 0.912461556119008  
"10922", "RNF20", 122.360352984311, 0.115587697743925, 0.25294037568986, 0.456976065717763, 0.647688248806921, 0.912461556119008  
"10923", "TAF3", 157.49438326286, -0.1104312059305, 0.241253895826745, -0.457738539525205, 0.647140296126259, 0.912461556119008  
"10924", "CDH23", 19.2155617979013, -0.1696013677395, 0.370621821336423, -0.457613011365426, 0.647230493941295, 0.912461556119008  
"10925", "CREBZF", 218.434967676053, 0.0954227505890151, 0.20874264632354, 0.457131076325988, 0.647576834781846, 0.912461556119008  
"10926", "MMP27", 39.2972463441333, 0.265361679534826, 0.580572066224723, 0.457069320024969, 0.647621221237175, 0.912461556119008  
"10927", "VSIG10L2", 6.45800898264466, 0.35877524946529, 0.781969731753909, 0.458809637887875, 0.646370873076836, 0.912461556119008  
"10928", "PIP4K2C", 19.6458149965079, -0.212983641376532, 0.464056098719637, -0.458960978994066, 0.646262187722101, 0.912461556119008  
"10929", "EP400", 121.894740830919, 0.112349569745116, 0.245985837278712, 0.45673186305364, 0.647863785718682, 0.912461556119008

"10930", "LINC00346", 12.4288699820486, -0.283539312965111, 0.620076546895764, -0.457265017334666, 0.647480570909696, 0.912461556119008  
"10931", "MBIP", 179.269978464164, 0.101000072753521, 0.221139594799214, 0.456725412946626, 0.647868422427671, 0.912461556119008  
"10932", "CGRRF1", 110.347482306208, -0.115145849553494, 0.251038138826677, -0.458678709504749, 0.646464905158502, 0.912461556119008  
"10933", "PGF", 12.0483480881105, -0.205869810048212, 0.448995202441597, -0.458512271241897, 0.646584448402638, 0.912461556119008  
"10934", "CDC42BPB", 289.71275972459, 0.117801505647023, 0.256861437145479, 0.45861888400283, 0.64650787340165, 0.912461556119008  
"10935", "INF2", 105.600785081803, 0.12420654668262, 0.271381232479657, 0.457682889666773, 0.647180282495695, 0.912461556119008  
"10936", "AC027020.2", 6.13852895703851, -0.329239634214587, 0.719148112658606, -0.457818950532216, 0.647082519804859, 0.912461556119008  
"10937", "ABI3", 2.35701295330119, -0.418524358586373, 0.914035455950262, -0.457886349880444, 0.647034094162694, 0.912461556119008  
"10938", "AC068473.5", 10.0691256156495, 0.275681016481092, 0.603561510115538, 0.456757118969232, 0.647845630441152, 0.912461556119008  
"10939", "COX7A1", 747.746245838939, -0.123883011699715, 0.270817600289437, -0.457440770346222, 0.647354265548371, 0.912461556119008  
"10940", "ZSWIM9", 30.8678688393573, -0.16360751845827, 0.356748280665959, -0.458607727983597, 0.646515886077419, 0.912461556119008  
"10941", "SOD1", 1768.63845025363, -0.104646662352845, 0.228295573735457, -0.45838235337014, 0.646677767443842, 0.912461556119008  
"10942", "Z98885.3", 5.01865343389884, -0.36562802928189, 0.798013605001672, -0.458172676493559, 0.646828388507173, 0.912461556119008  
"10943", "SMC1A", 206.717753788291, -0.122252407440883, 0.266374578475857, -0.458949229090807, 0.646270625624619, 0.912461556119008  
"10944", "RBMX2", 197.041301922019, -0.0873069729833792, 0.191110356605486, -0.456840615726595, 0.647785610080933, 0.912461556119008  
"10945", "CCL17", 2.6470056516925, -0.73917778073113, 1.61125208076617, -0.458759861076265, 0.64640662185779, 0.912461556119008  
"10946", "CSF3R", 14.6545594899168, 0.327267688744291, 0.717070573866534, 0.456395368421859, 0.648105695698291, 0.912545606429408  
"10947", "KLC1", 285.369165032029, -0.0742795473591215, 0.162736227764475, -0.456441373746385, 0.64807261973206, 0.912545606429408  
"10948", "MPP2", 11.1082161987815, -0.22316752195615, 0.488970347333943, -0.456402976525972, 0.648100225731448, 0.912545606429408  
"10949", "CAND2", 6.07233488266448, 0.317980131304828, 0.697206889564447, 0.456077150217885, 0.648334500719554, 0.912784393879983  
"10950", "G3BP2", 286.862709136978, 0.0795071738243021, 0.174469524473215, 0.455708090363415, 0.648599903458089, 0.912907917440325  
"10951", "METTL16", 89.1527174505699, 0.0992722767074544, 0.217763837535892, 0.45587126784121, 0.648482551810755, 0.912907917440325  
"10952", "ZNF569", 28.574228485671, -0.141886300162337, 0.311325216516943, -0.455749462731411, 0.648570149043614, 0.912907917440325  
"10953", "AC011603.2", 11.2688529622588, 0.228097138253197, 0.500756271991247, 0.455505304698778, 0.648745752116317, 0.913029833732588  
"10954", "THAP9", 10.9494266665643, -0.209046225378146, 0.45904121145304, -0.45539751151413, 0.648823285227694, 0.913055590814762

"10955", "IFNGR1", 580.39572547148, -0.101586972570725, 0.223356569631366, -0.454819720496186, 0.649238941625765, 0.913062624369372  
"10956", "LINC01239", 49.4001876492267, 0.190225189743504, 0.41811527439156, 0.454958719267837, 0.64913893748012, 0.913062624369372  
"10957", "RORB", 2.93402491886513, 0.508643732607004, 1.11825293507, 0.454855709880308, 0.649213048073687, 0.913062624369372  
"10958", "ECD", 74.7008144490486, 0.0946869788727831, 0.208085551528975, 0.455038700078118, 0.64908139730114, 0.913062624369372  
"10959", "PCF11-  
AS1", 9.55195582575039, -0.260237389870006, 0.572033102107706, -0.454934144389789, 0.649156617677533, 0.913062624369372  
"10960", "MRPL42", 211.653772120037, -0.111364298195374, 0.244856682766035, -0.454814207794299, 0.649242907928166, 0.913062624369372  
"10961", "TPD52L2", 212.524818333505, 0.0954782402785728, 0.209743809483037, 0.455213627109671, 0.648955557754211, 0.913062624369372  
"10962", "AL136171.2", 2.75651141798207, -0.441996864380438, 0.974090215771728, -0.45375352018115, 0.650006240922716, 0.913213829497367  
"10963", "TMEM184C", 73.7291305882928, 0.107350034207807, 0.236379145343395, 0.454143423066599, 0.649725601197142, 0.913213829497367  
"10964", "ADRA1B", 36.8654595116157, -0.198436025105858, 0.43753246084701, -0.453534406845403, 0.65016397354472, 0.913213829497367  
"10965", "UFL1", 325.02877288986, 0.0711068438837629, 0.156791396642482, 0.453512408247129, 0.650179810491963, 0.913213829497367  
"10966", "HOXA9", 40.4643951690422, -0.155620673261427, 0.342930153308458, -0.453796995569095, 0.649974946257628, 0.913213829497367  
"10967", "CCAR2", 51.8842066582039, -0.122741192208458, 0.270580680726365, -0.453621418495081, 0.650101334788236, 0.913213829497367  
"10968", "ZFH4-  
AS1", 23.3610816572181, 0.198292681619795, 0.436709893942571, 0.454060428605429, 0.649785333815376, 0.913213829497367  
"10969", "TOR2A", 51.1717063891022, 0.143645177079128, 0.316172286021348, 0.454325642790301, 0.649594462257015, 0.913213829497367  
"10970", "ZNF408", 19.5172565829059, 0.182371905545971, 0.401499264219487, 0.454227247216757, 0.649665273721938, 0.913213829497367  
"10971", "CHORDC1", 138.733844413312, -0.0949954596094147, 0.209250834404342, -0.453978880800312, 0.649844027441549, 0.913213829497367  
"10972", "CASP4", 501.14890113541, -0.0823369165883335, 0.181210710408532, -0.45437113735004, 0.649561722663048, 0.913213829497367  
"10973", "MFAP1", 155.557191387992, -0.120247600239524, 0.264797244478164, -0.454111977171425, 0.64974823311306, 0.913213829497367  
"10974", "IDH2", 84.8934238036727, 0.142731248280937, 0.314700768962054, 0.453545915225099, 0.650155688643337, 0.913213829497367  
"10975", "TSEN34", 208.353696567277, -0.103410999019099, 0.227818878201899, -0.453917602594169, 0.649888133554832, 0.913213829497367  
"10976", "TMED10", 793.78726341309, -0.0763289946326435, 0.168384768221172, -0.453301064217317, 0.650331966610653, 0.913344320818441  
"10977", "IMMT", 161.476800591464, -0.0921228062730039, 0.20329646664885, -0.45314514212451, 0.650444231317121, 0.913394221480299  
"10978", "ELMSAN1", 328.810363135228, 0.129424487559581, 0.285650330674783, 0.453087126676329, 0.650486004762291, 0.913394221480299

"10979", "AC093323.1", 60.7029368271739, -0.118807878507735, 0.262431150713974, -0.452720182739375, 0.650750244518565, 0.913608924857723  
"10980", "TAGAP", 13.6981791240252, -0.238766056380454, 0.52756857799547, -0.452578235966327, 0.650852473492814, 0.913608924857723  
"10981", "PSD3", 170.292600705633, -0.130091722794466, 0.287466551141345, -0.452545599750496, 0.650875978773111, 0.913608924857723  
"10982", "CYP4F12", 30.292835939835, 0.215390514956228, 0.475830534513249, 0.452662238619388, 0.650791974634748, 0.913608924857723  
"10983", "AC007390.2", 11.3162167180972, 0.221565477062906, 0.48986521042784, 0.452298861699925, 0.651053695872694, 0.913691981234302  
"10984", "PPP1R18", 210.327324151693, -0.0882191229754914, 0.195038821205904, -0.452315710431607, 0.651041559668229, 0.913691981234302  
"10985", "SLC35D1", 46.0319089106204, -0.121805859910776, 0.270205510446218, -0.450789695997042, 0.652141128399143, 0.913941975476053  
"10986", "GPR137B", 116.50876918667, 0.153329460406131, 0.339403792235942, 0.451761188041001, 0.651441032773974, 0.913941975476053  
"10987", "ELMOD3", 72.8278931421262, 0.103654874067592, 0.229486231809917, 0.451682322072589, 0.651497855263197, 0.913941975476053  
"10988", "AAMP", 250.23415701755, -0.0813118435590043, 0.180713266953024, -0.449949496957195, 0.652746856406858, 0.913941975476053  
"10989", "TCAIM", 38.3658385530749, -0.120780936607845, 0.268865866206598, -0.449223764667236, 0.653270245818926, 0.913941975476053  
"10990", "CCDC71", 41.0653311371591, 0.1347760438902, 0.298712836565608, 0.451189327649126, 0.651853100852041, 0.913941975476053  
"10991", "HESX1", 4.63934234983379, -0.347071940573524, 0.77168882480858, -0.449756338845021, 0.652886143038744, 0.913941975476053  
"10992", "QTRT2", 41.054250946409, 0.123624339765911, 0.274309789971229, 0.450674180381521, 0.652224393934888, 0.913941975476053  
"10993", "REST", 278.604351012469, 0.0763315630030257, 0.170139672672176, 0.448640589253401, 0.65369094860319, 0.913941975476053  
"10994", "PRMT9", 28.4057483440553, 0.14666366410224, 0.32486091838473, 0.451466014537789, 0.65165371402099, 0.913941975476053  
"10995", "MRPL36", 298.190527049333, -0.129777931285458, 0.288617649370569, -0.449653482967807, 0.652960317518437, 0.913941975476053  
"10996", "MDC1", 48.2043095940638, 0.140442514954711, 0.311446455972202, 0.450936307868106, 0.652035454420066, 0.913941975476053  
"10997", "AGER", 6.29859557993355, 0.303633176969459, 0.675671407701092, 0.449379940469203, 0.653157599287284, 0.913941975476053  
"10998", "KCTD20", 255.164146081948, 0.0857782202365563, 0.191060911492222, 0.448957453236311, 0.653462349239218, 0.913941975476053  
"10999", "B3GAT2", 12.4254384193588, -0.259495554593919, 0.578820203115043, -0.448318066987622, 0.65392366347197, 0.913941975476053  
"11000", "AC018647.2", 29.8688291757365, -0.146172182093787, 0.324092018715399, -0.451020616530974, 0.651974690117814, 0.913941975476053  
"11001", "COA1", 149.655147412966, 0.0870303172479842, 0.193248949012036, 0.45035337937369, 0.652455655255366, 0.913941975476053  
"11002", "NDUFB2-AS1", 3.91613386935326, 0.353226509945628, 0.784530729853425, 0.450239227737608, 0.652537953762816, 0.913941975476053  
"11003", "PIWIL2", 8.51662758735317, 0.256514173740528, 0.572300216816076,

0.448216104420882,0.653997241224904,0.913941975476053  
"11004","AC138696.2",5.17452879395666,-0.274985499009753,0.60928599506  
6667,-0.4513241749134,0.651755923752608,0.913941975476053  
"11005","RFX3-  
AS1",5.8467612013506,0.287401454712249,0.639697785872846,0.44927692585  
351,0.653231900814384,0.913941975476053  
"11006","PLPP6",18.2461267968996,0.191713067938748,0.427638738380991,0  
.448306130227022,0.653932277047796,0.913941975476053  
"11007","AL358781.1",5.86906443285005,0.385056492151346,0.859773334633  
915,0.447858146607094,0.654255575697583,0.913941975476053  
"11008","CAMK2G",130.668846411546,0.0815408453199635,0.181320187907721  
,0.449706379972769,0.652922170433389,0.913941975476053  
"11009","NUTM2B-  
AS1",149.262729402069,0.109750229088872,0.244208022507095,0.4494128733  
45238,0.653133846461294,0.913941975476053  
"11010","MMS19",63.9885633655237,0.0932884723748438,0.208208508586879,  
0.448053122362755,0.654114858562428,0.913941975476053  
"11011","CATSPERZ",8.72946439962061,-0.349628398515483,0.7780095922507  
75,-0.449388287751069,0.65315157877973,0.913941975476053  
"11012","AP003396.5",7.92646783397611,0.298362356810586,0.665128057677  
884,0.448578816314317,0.653735518055749,0.913941975476053  
"11013","HYLS1",17.7791623956195,-0.173405591953053,0.385075169213521,  
-0.450316213084362,0.652482450115485,0.913941975476053  
"11014","DYRK4",18.6772452607111,-0.338026308232334,0.753811006112228,  
-0.448423153139806,0.653847835211262,0.913941975476053  
"11015","SPSB2",45.1156375500435,0.140297072655297,0.311536216777453,0  
.450339527476252,0.652465641662739,0.913941975476053  
"11016","AC079601.1",3.99755384887487,-0.321350854211047,0.71737304311  
8928,-0.447955017676588,0.654185660754265,0.913941975476053  
"11017","PAN2",37.9107342916227,-0.147788403509646,0.32967974645287,-0  
.448278685905787,0.653952081066375,0.913941975476053  
"11018","SETD1B",56.2605312219666,0.1275694601847,0.283315810118606,0.  
450273001465379,0.652513603891169,0.913941975476053  
"11019","EIF5",1175.76483957056,-0.101957512576966,0.226870113079785,-  
0.449409184810122,0.65313650679855,0.913941975476053  
"11020","RPUSD2",28.6152918062997,0.160312365417489,0.355492675437448,  
0.45095827985828,0.652019618189565,0.913941975476053  
"11021","MAN2C1",110.859857938889,0.110684033525239,0.245671207781291,  
0.450537262892342,0.652323091903439,0.913941975476053  
"11022","KLHL25",4.72818652588389,-0.379515675226982,0.846507312693856  
, -0.448331242431021,0.653914156115181,0.913941975476053  
"11023","PRSS27",2.58624608165436,-0.443576676012896,0.988075379135378  
, -0.448929996010072,0.653482156781681,0.913941975476053  
"11024","AC007611.1",6.85060732311196,0.300806735036747,0.666496110268  
523,0.451325567249832,0.651754920402208,0.913941975476053  
"11025","AKAP1",48.6206786214732,0.136546177229435,0.304613661750158,0  
.448260187822531,0.653965429553071,0.913941975476053  
"11026","B4GALT6",15.5258500979385,-0.21171257330964,0.469608373970439  
, -0.450827934603583,0.652113566344335,0.913941975476053  
"11027","TYK2",65.9230079980244,0.124233167090654,0.277140356640124,0.



448268049434514,0.653959756485668,0.913941975476053  
"11028","AC011472.4",3.5403409020541,-0.401479563595216,0.891511652545  
038,-0.45033574429352,0.652468369126909,0.913941975476053  
"11029","ZNF20",13.9486968568774,-0.180884485526169,0.400558237422319,  
-0.451580990295446,0.651570867213173,0.913941975476053  
"11030","PLEKHF1",236.257977260137,0.144650164196185,0.322797621027121  
,0.448114096181742,0.654070855300676,0.913941975476053  
"11031","CCNE1",3.15670934035548,-0.433353245165605,0.967153359669353,  
-0.44807086780297,0.65410205200338,0.913941975476053  
"11032","PIH1D1",679.888453052651,0.113027183969964,0.25136525269968,0  
.449653175035309,0.652960539589001,0.913941975476053  
"11033","PREX1",9.80876120653512,0.279106170970249,0.623116162074286,0  
.447919967347878,0.654210957345186,0.913941975476053  
"11034","FAM210B",384.221275189801,0.0969068717397613,0.21473844811703  
8,0.451278625646696,0.651788747973845,0.913941975476053  
"11035","HLCS",24.7139877137052,-0.16536922455506,0.368035791229302,-0  
.449329191605791,0.653194202576517,0.913941975476053  
"11036","ZNF140",43.2605815260923,0.121400225466869,0.271122029265888,  
0.447769684357934,0.654319424376605,0.913948344215781  
"11037","C2orf73",3.12120161243056,-0.437588361771181,0.97756623273569  
5,-0.447630397938972,0.654419961129835,0.914001858561355  
"11038","SYNCRIP",407.471670313336,-0.0753412691305628,0.1683499250024  
01,-0.447527785530573,0.654494030640848,0.914001858561355  
"11039","DERL2",265.445264310277,-0.105948849585258,0.236772984880223,  
-0.447470177557859,0.654535615741732,0.914001858561355  
"11040","MRPL27",376.419938722986,-0.112236124000402,0.250978274608967  
, -0.447194579591681,0.654734574722336,0.914196872223262  
"11041","YPEL3",820.39288796232,-0.107384698559874,0.240179624641883,-  
0.447101617050109,0.654801691534696,0.914207777828761  
"11042","CDKN2A",31.0960685451345,0.297687321978447,0.666365379254536,  
0.44673287545561,0.655067941941024,0.914417377440912  
"11043","MCM8",19.390223694395,0.168957931454362,0.378210913427808,0.4  
46729392134825,0.655070457287057,0.914417377440912  
"11044","APH1B",162.129241238281,0.092443469724277,0.207000767155298,0  
.446585155188933,0.655174615882263,0.914479962316651  
"11045","GMDS-  
DT",71.9175444241503,0.103949316011987,0.232893375520285,0.44633865510  
2422,0.655352637835129,0.914619197364271  
"11046","DGCR11",3.01752454140505,-0.386590141149678,0.866244923201593  
, -0.446282720735451,0.655393036268942,0.914619197364271  
"11047","NCBP2AS2",192.3878042438,-0.116843242883094,0.261977799387202  
, -0.446004368142662,0.655594090613627,0.914696132006879  
"11048","CHMP5",611.739719974044,-0.097332295820882,0.218253448386211,  
-0.44595994491985,0.655626179860137,0.914696132006879  
"11049","WDR93",2.47909330332845,-0.529062922957083,1.18615539530135,-  
0.446031713089895,0.655574338226165,0.914696132006879  
"11050","TMEM183A",185.031239957239,-0.0831518783745056,0.186492402792  
685,-0.445872738670978,0.65568917540106,0.914701234281207  
"11051","CTSW",8.81007559268297,0.337709967463038,0.758196368305847,0.  
445412272572123,0.656021844817589,0.915082502747546

"11052", "SUCLG2", 351.684302779087, -0.0745735684327378, 0.16753673294744  
4, -0.445117719086304, 0.656234684408673, 0.915256314434076  
"11053", "CIA02A", 130.796208660805, 0.0970281829259676, 0.218003877081996  
, 0.445075492347657, 0.656265199055455, 0.915256314434076  
"11054", "ING3", 127.527248268319, -0.0864778482421014, 0.194522250594983,  
-0.444565328529731, 0.65663390813311, 0.915687687160475  
"11055", "RRAGA", 633.689890876974, -0.103831862001716, 0.233613287137299,  
-0.44446042977295, 0.656709731647516, 0.915710584653683  
"11056", "RGS5", 7.6001155240246, 0.245582304364063, 0.553313381809664, 0.4  
43839445127575, 0.657158667678209, 0.915713023523493  
"11057", "TP53BP2", 125.398888976887, 0.121460681549137, 0.273568741438403  
, 0.443985964589764, 0.657052731410081, 0.915713023523493  
"11058", "C1orf35", 166.05622901593, -0.0898054603921175, 0.20239286838517  
3, -0.443718502082836, 0.657246116916246, 0.915713023523493  
"11059", "OTULINL", 19.6749107162423, 0.188742788987309, 0.424770289039272  
, 0.444340844587317, 0.656796175202001, 0.915713023523493  
"11060", "AC055822.1", 4.00238890370181, 0.393261575552565, 0.885951694354  
148, 0.44388602455267, 0.657124989149444, 0.915713023523493  
"11061", "NTRK2", 2148.95296022091, 0.131982745112665, 0.297165823110582, 0  
.444138372748037, 0.65694254481853, 0.915713023523493  
"11062", "TECPR2", 71.6122004599579, -0.0966053184239155, 0.21771316046521  
3, -0.44372750924881, 0.657239604021138, 0.915713023523493  
"11063", "AC006441.4", 4.08030939068294, 0.334818147494552, 0.754039075301  
416, 0.444032886970365, 0.657018807121942, 0.915713023523493  
"11064", "SLC25A18", 8.99025394045485, 0.261090377653333, 0.58793589164996  
, 0.444079671544833, 0.656984983169592, 0.915713023523493  
"11065", "NFU1", 211.444302119643, -0.117274751378007, 0.264471729155265, -  
0.443430198579591, 0.657454596954819, 0.915837937109934  
"11066", "NUDT16L1", 101.766010172417, -0.11339326349899, 0.25571710844053  
4, -0.443432448421258, 0.657452969930425, 0.915837937109934  
"11067", "RAB7A", 780.53147415921, -0.0802745447973385, 0.18109398168129, -  
0.443275607792504, 0.657566396701021, 0.91591090676301  
"11068", "GCLM", 123.630385901451, 0.141921520315314, 0.321664767000019, 0.  
441209404557838, 0.659061405397808, 0.916690184586995  
"11069", "MSH2", 63.3364763459198, 0.128804135034696, 0.291933636164698, 0.  
441210326863568, 0.659060737755651, 0.916690184586995  
"11070", "IL18R1", 8.48753982786975, -0.229841606810045, 0.520294397032471  
, -0.441752992384619, 0.658667958110055, 0.916690184586995  
"11071", "LINC01124", 4.11671197179047, 0.372055197252342, 0.8417267917749  
6, 0.442014203287726, 0.658478928016612, 0.916690184586995  
"11072", "LSM3", 621.793599368193, -0.118469488087034, 0.268411871278768, -  
0.441372013550002, 0.658943699585027, 0.916690184586995  
"11073", "NUDT9", 156.737814347395, -0.0753201021780673, 0.170281836858856  
, -0.442326108101, 0.658253240927957, 0.916690184586995  
"11074", "LRRCC1", 94.8266617308815, -0.109806180933287, 0.248615642412872  
, -0.441670443048526, 0.65872770099804, 0.916690184586995  
"11075", "CDC16", 175.344443918938, 0.0791739515102608, 0.179359354777658,  
0.441426384525126, 0.658904344606469, 0.916690184586995  
"11076", "NAA38", 684.483497117234, -0.119626898541349, 0.27060701581169, -  
0.442068725315663, 0.65843947489701, 0.916690184586995

"11077", "AC091271.1", 44.9666151652731, -0.174343576950252, 0.395169001524613, -0.441187381291579, 0.659077347763715, 0.916690184586995  
"11078", "TYMS0S", 2.8945308509891, 0.421934793669972, 0.955734167192724, 0.441477147258762, 0.658867602209759, 0.916690184586995  
"11079", "DOT1L", 30.512179697145, -0.158215436785081, 0.357882440172376, -0.442087733359804, 0.658425720558087, 0.916690184586995  
"11080", "CTU1", 75.4822786247763, 0.142679221643893, 0.323059889356657, 0.441649447500355, 0.658742896315478, 0.916690184586995  
"11081", "LINC01597", 3.86793326851735, 0.361075994693079, 0.817681738898073, 0.441585004918508, 0.658789536867762, 0.916690184586995  
"11082", "ZNF70", 15.4191868356944, 0.203018638806138, 0.460106967287777, 0.44124226156123, 0.659037620913585, 0.916690184586995  
"11083", "LPAR4", 19.6413291056922, 0.198442896588443, 0.449554427551871, 0.441421292787836, 0.658908030084465, 0.916690184586995  
"11084", "AKIRIN2", 245.119798061703, -0.0906895229503837, 0.205614838660736, -0.441065068752267, 0.659165891094025, 0.916730621726308  
"11085", "DZIP1", 123.001842710462, 0.109774835121144, 0.24903936754692, 0.44079310111668, 0.659362788436417, 0.916921730604183  
"11086", "SREK1", 429.699188848079, 0.0807514600965515, 0.183291622843651, 0.440562742823402, 0.659529580185671, 0.916948892937354  
"11087", "SYVN1", 120.314338960996, -0.0890453349678272, 0.202137026530739, -0.440519663794926, 0.65956077358997, 0.916948892937354  
"11088", "AC008735.1", 4.07287526700113, -0.299498413905093, 0.679807471969551, -0.4405635805052, 0.659528973628486, 0.916948892937354  
"11089", "LINC01116", 191.514968801339, 0.188004125727565, 0.427057323823573, 0.44023159243426, 0.659769380470674, 0.916997024653439  
"11090", "ADAP1", 17.3067634366133, -0.339934272529974, 0.772326410932693, -0.440143270666421, 0.659833343980275, 0.916997024653439  
"11091", "IL32", 345.07324674228, 0.127183520906701, 0.28893868752921, 0.440174772005371, 0.659810530109539, 0.916997024653439  
"11092", "AC087294.1", 2.54856790942585, 0.4005284186775, 0.909864714290209, 0.440206563005309, 0.659787506781504, 0.916997024653439  
"11093", "SRRM1", 722.949404487368, -0.069508520281048, 0.157989337194248, -0.4399570345408, 0.659968226198355, 0.917101794541391  
"11094", "MEGF6", 180.795274632792, 0.161334067562605, 0.366848704447406, 0.439783664509941, 0.660093800031958, 0.91717663067395  
"11095", "MYLK-AS1", 8.56470524742502, -0.237147689158101, 0.539518748724643, -0.439554120628226, 0.660260075938296, 0.91717663067395  
"11096", "PODXL2", 46.2951555520064, 0.144081333936494, 0.32774808295699, 0.439609997521792, 0.660219598554409, 0.91717663067395  
"11097", "PRPF18", 184.551191519354, -0.0814911313790538, 0.185326188958678, -0.439717299734813, 0.660141871307882, 0.91717663067395  
"11098", "RBMXL1", 77.1017570442671, -0.108951464136038, 0.24800000827618, -0.439320405242512, 0.660429390816534, 0.917246514049632  
"11099", "STOM", 807.972634259242, 0.0877177362192851, 0.199649082010375, 0.439359576993831, 0.66040101166738, 0.917246514049632  
"11100", "ATAD3C", 2.36341483679798, -0.485891486799267, 1.10646123351367, -0.43914009102359, 0.660560031153825, 0.917251654563691  
"11101", "IL22RA1", 4.18984992579931, -0.408464426593741, 0.93081912246735

4,-0.438822556106293,0.660790115078157,0.917251654563691  
"11102","SLC25A38",59.3324901859928,-0.0962537367161526,0.219257102215  
779,-0.438999401813793,0.660661969766678,0.917251654563691  
"11103","STX1A",7.014573197302,0.322886110691675,0.735417940152973,0.4  
39051174933959,0.660624455993727,0.917251654563691  
"11104","TMX1",205.193301647757,-0.0777305359244477,0.177112738728968,  
-0.43887603162976,0.660751364784276,0.917251654563691  
"11105","CCDC32",186.122736066565,-0.104883756077219,0.238982833183051  
,-0.438875691112431,0.660751611532542,0.917251654563691  
"11106","PRPSAP1",148.569129370316,-0.106084209999049,0.24179303071220  
3,-0.438739734088188,0.66085013269575,0.917252367684584  
"11107","SNHG5",1390.84973275762,0.166391007997283,0.379443098353968,0  
.438513728986218,0.661013920139899,0.917397099032731  
"11108","FAM49B",65.465545909239,-0.116305892410607,0.265289020439198,  
-0.438412008978197,0.661087642623558,0.91741681770275  
"11109","HSD17B7",53.9443128000437,-0.123003018839776,0.28084886011593  
6,-0.437968730900313,0.661408950740628,0.917480497206926  
"11110","AC009951.6",53.0786147607693,-0.157691260601363,0.35996277908  
9632,-0.438076572806151,0.661330776276775,0.917480497206926  
"11111","IP6K2",335.718272682571,-0.0944994718287882,0.215852586850034  
,-0.437796336878941,0.661533926621845,0.917480497206926  
"11112","HNRNPDL",978.874290880002,0.101525848304117,0.231954511227407  
,-0.437697235405705,0.661605773835376,0.917480497206926  
"11113","LYNX1",9.41679852951916,0.235436028143256,0.537973159867746,0  
.437635268274602,0.661650700742102,0.917480497206926  
"11114","NEK5",9.30035438581996,-0.221373054077095,0.505514492923094,-  
0.43791633509264,0.661446933729493,0.917480497206926  
"11115","KMT5C",31.8585444172324,0.135554568550536,0.30946128010823,0.  
438034019968918,0.661361622334655,0.917480497206926  
"11116","ZMAT5",112.442811487227,0.143391537534897,0.327669883196404,0  
.437609755697165,0.661669198018125,0.917480497206926  
"11117","SRPX",1583.14067978033,0.143804717896142,0.328189934756648,0.  
438175284085945,0.661259223829725,0.917480497206926  
"11118","MYL12A",1783.47892823534,-0.113652955524571,0.259806011460216  
,-0.437453140078612,0.661782752901782,0.917555417879202  
"11119","TJAP1",58.1309867242785,0.103020105246081,0.235643281864895,0  
.437186685021417,0.661975965258996,0.91774075946285  
"11120","RASIP1",2.96423956277703,0.432797815452853,0.990282103447267,  
0.437044973292198,0.662078732685593,0.917800689239966  
"11121","LEPR",414.488581442863,0.187028517339174,0.428313920069277,0.  
43666224368548,0.662356314816593,0.917874964067048  
"11122","ARFIP1",184.740070429853,0.0754512143363288,0.172753330639597  
,-0.436756929993654,0.662287637399731,0.917874964067048  
"11123","PALLD",632.074707676675,-0.0963584335957702,0.220763287370745  
,-0.436478522961782,0.662489578346414,0.917874964067048  
"11124","RNMT",309.031991411479,-0.0754886592993425,0.172930744543772,  
-0.436525381871787,0.662455587786305,0.917874964067048  
"11125","NNAT",5.66697972350578,-0.400517415175803,0.917291678773191,-  
0.436630380983577,0.662379425956601,0.917874964067048  
"11126","NF2",93.7491629342668,0.0861938467732523,0.197335882678868,0.

436787499582722,0.662265465419121,0.917874964067048  
"11127","KIN",152.804097496959,0.0975255174829603,0.22361260736165,0.4  
36136041852201,0.662738028720253,0.917889192517762  
"11128","CHID1",433.399151955245,0.126317778049999,0.289623068630278,0  
.436145430843605,0.66273121705138,0.917889192517762  
"11129","MTA2",33.5469363738585,-0.130915661597608,0.300169151461458,-  
0.436139626474632,0.662735428090335,0.917889192517762  
"11130","INPP5K",57.4140460234269,-0.109328618108722,0.250670159096516  
,-0.436145325405993,0.662731293545714,0.917889192517762  
"11131","AIFM2",90.0836822831298,0.102872398909046,0.23597164391079,0.  
435952376328475,0.662871282798377,0.917991269817355  
"11132","FBX022",92.8528957712086,0.0883283405919246,0.202685150040758  
,0.435790883417767,0.662988458889158,0.918071064837978  
"11133","LINC01128",57.0483534437731,-0.12255270894339,0.2814499448606  
63,-0.435433408963936,0.663247864674354,0.918100380204308  
"11134","AAMDC",448.789216848624,-0.101821435339677,0.233782403861406,  
-0.435539346237712,0.663170985762052,0.918100380204308  
"11135","SCRN2",142.07651856351,0.108006217682634,0.248028211820844,0.  
43545940556411,0.663228998556116,0.918100380204308  
"11136","ZNF613",4.87439646491105,0.320936606887726,0.73687324955231,0  
.435538414622477,0.663171661821816,0.918100380204308  
"11137","ATG16L1",29.8075137515523,0.131200275509063,0.301484735762396  
,0.435180491567122,0.663431421723798,0.918147404399246  
"11138","PFKFB3",99.1893666427814,0.197489044099832,0.453861337441677,  
0.435130793940363,0.663467492593683,0.918147404399246  
"11139","SLC26A10",2.43487783161825,0.46640818200482,1.0715790864124,0  
.435253158557186,0.663378680940689,0.918147404399246  
"11140","RNFT1",108.366159239679,-0.101166341979311,0.232535118303483,  
-0.435058337499277,0.663520083360856,0.918147404399246  
"11141","TMEM39A",91.2921753528663,0.0875550734997946,0.20161570675370  
6,0.434267125858166,0.664094473169221,0.918808989330975  
"11142","TMEM203",208.276975306649,-0.0945512117996773,0.2177417590444  
34,-0.434235546799189,0.664117402473287,0.918808989330975  
"11143","SLC25A21-  
AS1",31.6681326201317,0.162253343204289,0.373972881187626,0.4338639280  
18045,0.664387255536994,0.919029247913174  
"11144","JUP",96.3221296609475,-0.102959363873609,0.237323280071379,-0  
.433835921375444,0.664407594481292,0.919029247913174  
"11145","SECTM1",46.8206697549209,-0.14740494155967,0.339951476505275,  
-0.433605828322921,0.6645747016859,0.919029247913174  
"11146","TMEM259",305.529098828731,-0.0716841612248268,0.1653087542675  
35,-0.433638022030057,0.664551319705362,0.919029247913174  
"11147","ZNF793",9.00584136575408,-0.340856464679468,0.785988477895991  
,-0.433665981455485,0.664531013307837,0.919029247913174  
"11148","HARBI1",7.67629088436086,-0.240352720955087,0.554721285407078  
,-0.43328555668944,0.664807329671683,0.919186024476544  
"11149","AP000842.1",2.42557767040607,0.55088897063305,1.2713949720489  
4,0.433294910507042,0.664800535106915,0.919186024476544  
"11150","RNF123",34.0788131855428,-0.125661641587323,0.290198818768352  
,-0.433019135366058,0.66500086830457,0.919371155597753

"11151", "LRRC40", 81.2777725481727, 0.0864666823922413, 0.199931157751832, 0.43248227722249, 0.66539093040005, 0.919415667991822  
"11152", "RAB7B", 113.255863871366, 0.106302836386727, 0.245738617921102, 0.432584985160359, 0.665316299443992, 0.919415667991822  
"11153", "MARK1", 33.528527957011, -0.135271112595849, 0.312698090450003, -0.432593343954166, 0.665310225816175, 0.919415667991822  
"11154", "RRAGD", 56.8873870056245, -0.180822065097046, 0.418037096130188, -0.432550285060667, 0.6653415133036, 0.919415667991822  
"11155", "LRP12", 80.3451042559189, -0.116802488170877, 0.270064648443118, -0.432498251230678, 0.665379322944098, 0.919415667991822  
"11156", "DOLPP1", 16.144543318597, -0.191302114949395, 0.442119729826862, -0.432693006087538, 0.665237811473161, 0.919415667991822  
"11157", "GATC", 112.792041731962, 0.102534095041419, 0.237219330449826, 0.432233304288437, 0.665571856056241, 0.919583235736037  
"11158", "ERMARD", 39.3572748090723, -0.129335497741562, 0.299352772582372, -0.432050442111649, 0.66570475221788, 0.91968441973818  
"11159", "SELENOT", 264.869712740114, -0.087814344658325, 0.203333701998827, -0.431873043155589, 0.665833687985887, 0.919697697159717  
"11160", "WAPL", 183.359307495665, 0.0856871013116042, 0.198395444497034, 0.431900548567713, 0.665813696063028, 0.919697697159717  
"11161", "ATP5IF1", 856.679928818014, 0.118524830867781, 0.27495483525432, 0.431070181974254, 0.666417340953828, 0.92008270618305  
"11162", "ARF4", 952.127607241482, -0.101609719134247, 0.236262737055237, -0.430070862636672, 0.667144094566868, 0.92008270618305  
"11163", "TOPBP1", 99.2272009529879, 0.095406652196694, 0.221600148493176, 0.430535145600915, 0.666806406528648, 0.92008270618305  
"11164", "NLN", 39.7220880016113, -0.121341696897369, 0.281570178117586, -0.430946550194303, 0.666507235041377, 0.92008270618305  
"11165", "LINC01184", 102.384454934346, 0.081075843387894, 0.188499844071389, 0.430110930793072, 0.667114949039333, 0.92008270618305  
"11166", "FAM133B", 720.35393857205, -0.112213925804422, 0.260372264669002, -0.430974957901426, 0.666486579047298, 0.92008270618305  
"11167", "WDR91", 31.1857774106385, -0.118600364774411, 0.275645866785797, -0.430263533995141, 0.667003950258124, 0.92008270618305  
"11168", "ATP6V1G1", 988.556848756524, -0.0878947959707169, 0.203976085839158, -0.430907356659568, 0.666535734110679, 0.92008270618305  
"11169", "MVB12B", 21.9155548021287, 0.153260901549158, 0.356438587732496, 0.429978422157196, 0.667211337573522, 0.92008270618305  
"11170", "CHUK", 33.1006032292513, 0.136099028706995, 0.315896756986796, 0.430833890177238, 0.66658915560496, 0.92008270618305  
"11171", "GRAMD1B", 3.26568251243251, 0.411871471221116, 0.957522190355947, 0.430143003858749, 0.66709161949287, 0.92008270618305  
"11172", "ULK1", 110.038726486744, 0.123101707605857, 0.286329582745047, 0.429930105110615, 0.667246485398658, 0.92008270618305  
"11173", "IRF2BPL", 226.863484774396, 0.0928129701331982, 0.215227621901783, 0.431231685380757, 0.666299917188418, 0.92008270618305  
"11174", "AC023449.2", 2.50272998971145, -0.399024800209726, 0.926747113587795, -0.43056492365533, 0.666784750287788, 0.92008270618305  
"11175", "IRX6", 15.6220075067406, -0.25371459297303, 0.589494633252853, -0.430393388949147, 0.666909503578021, 0.92008270618305

"11176", "PGLS", 899.356684741015, -0.112279577476312, 0.261086534178847, -0.430047370422402, 0.667161183008107, 0.92008270618305  
"11177", "NDRG3", 97.2139916404274, 0.0949542599272635, 0.220793076861581, 0.430059951502882, 0.667152031399134, 0.92008270618305  
"11178", "BACE2", 250.590365494802, -0.085055129745353, 0.197594008658646, -0.43045399161009, 0.666865427588771, 0.92008270618305  
"11179", "UTP14A", 67.1555605478543, -0.113965872348164, 0.26472789394121, -0.430501941640775, 0.666830554604191, 0.92008270618305  
"11180", "LAPTM4A", 6903.71283802825, -0.10501789037181, 0.244492472653266, -0.429534247955127, 0.667534475813555, 0.920120231190947  
"11181", "HIVEP1", 194.920583521964, 0.112692422124983, 0.262391203198323, 0.429482470263331, 0.66757214827373, 0.920120231190947  
"11182", "SBN01", 199.230464276387, 0.0935939146428223, 0.217882441294043, 0.429561529083993, 0.667514626921972, 0.920120231190947  
"11183", "GPI", 257.974078472366, -0.0832937552548789, 0.193855952138897, -0.429668288932389, 0.667436954049372, 0.920120231190947  
"11184", "UBA2", 326.205394529003, -0.0749252307983697, 0.174328182721192, -0.429794136718557, 0.66734539836866, 0.920120231190947  
"11185", "DYNC1I2", 843.44304608852, 0.0747495975760224, 0.174112792150147, 0.429317091828391, 0.667692480076868, 0.920150142643191  
"11186", "AL157938.3", 14.1799159027997, -0.172881848578669, 0.402717101063848, -0.429288570368557, 0.667713233578121, 0.920150142643191  
"11187", "BGLAP", 31.0874316382096, 0.150217664308163, 0.350200034565033, 0.428948170992448, 0.667960943135258, 0.920150654897099  
"11188", "NFXL1", 46.4396144061242, 0.135330279068825, 0.315364333660613, 0.429123602843637, 0.667833276378606, 0.920150654897099  
"11189", "SCAF8", 124.639938498936, 0.0856371206790108, 0.199798759127069, 0.428616879570043, 0.668202059542598, 0.920150654897099  
"11190", "SLC29A4", 2.67904575985411, -0.395189176496073, 0.921864329936734, -0.428684746402102, 0.668152662758616, 0.920150654897099  
"11191", "TMEM74", 4.60464350206468, -0.326799057368767, 0.762409775272255, -0.428639647559697, 0.668185487731254, 0.920150654897099  
"11192", "GRHPR", 506.619907532683, -0.0983705492787334, 0.229492827522504, -0.428643240578345, 0.668182872546879, 0.920150654897099  
"11193", "CCDC61", 54.406466720031, -0.117676885054204, 0.274593210206661, -0.428549871883719, 0.66825083240824, 0.920150654897099  
"11194", "PMEPA1", 128.508260720949, -0.103907697138086, 0.24219490223484, -0.429025120592067, 0.667904943536081, 0.920150654897099  
"11195", "MED140S", 17.5055590302509, -0.200422093190525, 0.467138630453848, -0.429042001933784, 0.667892658490446, 0.920150654897099  
"11196", "FM05", 20.1021924825676, 0.151270425574332, 0.353529096605364, 0.427886776581763, 0.668733554876759, 0.920155850698123  
"11197", "ATF6", 183.022791141962, 0.0854280862988043, 0.199597369757273, 0.428002064369345, 0.668649617421905, 0.920155850698123  
"11198", "NOL10", 84.3669755483496, 0.0851203664044854, 0.198975520859474, 0.427793157855842, 0.66880171880783, 0.920155850698123  
"11199", "EIF2AK2", 478.752346113409, -0.0724646555942736, 0.169377212212342, -0.427830017082979, 0.668774881224864, 0.920155850698123  
"11200", "PLXNA1", 174.973446800904, 0.105455186152057, 0.246573073093779, 0.427683302271813, 0.668881708300224, 0.920155850698123

"11201","RELN",7.7289094398104,-0.695487570004601,1.62632836323717,-0.427642772349028,0.668911220429657,0.920155850698123  
"11202","AL589843.1",4.77162657110717,0.321291571364233,0.750134505615793,0.428311948002554,0.668424021310369,0.920155850698123  
"11203","JMJD1C",676.773366458082,-0.117107491254229,0.27361594276337,-0.427999516663787,0.668651472282388,0.920155850698123  
"11204","ZNF557",39.677103092783,-0.141843783548982,0.331445308106363,-0.427955321978681,0.668683648604598,0.920155850698123  
"11205","AC008569.2",3.47396837456859,0.399076241378341,0.933042170730207,0.427715117169913,0.66885854243163,0.920155850698123  
"11206","B3GNT8",42.0862876916746,-0.15352794809007,0.358358118832925,-0.428420454349044,0.668345035477149,0.920155850698123  
"11207","CNDP2",141.17789185981,0.0685707859360592,0.160404334257909,0.427487114068915,0.669024568782888,0.920229653590454  
"11208","AL391988.1",7.64283903362936,0.241311211617822,0.564647400434177,0.427366196022986,0.669112624950913,0.920268657531971  
"11209","ZWINT",10.345050980105,0.229156712284302,0.536407258251671,0.427206583727445,0.669228866406192,0.920346415884686  
"11210","PLEKHH2",321.874050682935,-0.173669029110237,0.406616731176863,-0.427107435071817,0.669301077767155,0.920363614074994  
"11211","C15orf39",32.2001654149714,0.140928851095122,0.330067200786924,0.426970176858317,0.669401049902216,0.92041897995207  
"11212","CDHR3",18.4823068373035,0.162865919072423,0.381592964744012,0.426805350517087,0.669521109048529,0.920501952906089  
"11213","UBR1",114.976462125722,0.114138202089885,0.267618768029855,0.426495506761886,0.669746821421984,0.920710534071249  
"11214","PLXNA3",54.0340340464956,0.123337282725214,0.289230077079664,0.426433115015361,0.669792275645474,0.920710534071249  
"11215","ZNF200",29.9055869594454,0.137507685547377,0.322574397907985,0.426282080782499,0.669902313535884,0.920779684632693  
"11216","BCDIN3D",43.0426723291559,0.13126722168274,0.308293188493974,0.425786967023134,0.670263084563398,0.92094709408546  
"11217","C18orf54",17.8908612947554,0.201221233305263,0.472513686903843,0.425852708360195,0.670215176909211,0.92094709408546  
"11218","ZNF814",10.0284151411019,0.20253297127532,0.475572775616805,0.42587166814299,0.670201360604626,0.92094709408546  
"11219","CDK16",127.765235910369,0.0758563115307291,0.178106843323412,0.425903407838109,0.67017823161809,0.92094709408546  
"11220","SEMA5A",22.7002595405808,0.45363959613917,1.06562700006315,0.425702047820001,0.67032496967995,0.920950036329449  
"11221","GPR155",31.1333504979337,-0.141891810451992,0.33370267837852,-0.425204290062795,0.670687757072341,0.921120079763911  
"11222","DDX39B",567.739435961121,-0.0786432582499789,0.184858619323056,-0.425423810574627,0.6705277515545,0.921120079763911  
"11223","AHNAK",6515.66691746003,0.0757192023281645,0.178015066300701,0.425352774355966,0.670579527253943,0.921120079763911  
"11224","ZNF543",13.6920349368893,0.194792618443016,0.458040957440078,0.42527336317626,0.670637409007897,0.921120079763911  
"11225","AL360012.1",48.7557104568872,0.174143007427387,0.410597757322519,0.424120697986668,0.671477791313671,0.921128275112573



"11226", "TESK2", 13.220244528491, -0.210211341678588, 0.495657497758719, -0.424106046270115, 0.67148847619808, 0.921128275112573  
"11227", "ZNF326", 175.195951957412, -0.085843116782978, 0.202181619579844, -0.424584152885358, 0.671139847306046, 0.921128275112573  
"11228", "ZEB2", 834.245715546577, 0.0742674872116107, 0.175065958331196, 0.42422574850965, 0.671401184303358, 0.921128275112573  
"11229", "IMPG2", 3.29604729576005, -0.460024504496742, 1.08349779259546, -0.424573550255951, 0.671147577833341, 0.921128275112573  
"11230", "CASP6", 88.0037354933457, 0.0916310577017677, 0.215696913753941, 0.424813948920461, 0.670972308313547, 0.921128275112573  
"11231", "BRIX1", 154.056949409038, -0.0955623475516285, 0.22531658656222, -0.424124779314635, 0.671474814983617, 0.921128275112573  
"11232", "ZNF680", 99.4211696411488, -0.115946547243729, 0.273003665292546, -0.424706925159713, 0.671050334836395, 0.921128275112573  
"11233", "ZC3HC1", 34.5443684484427, 0.121011965294042, 0.284796538855097, 0.424906727379899, 0.670904670311313, 0.921128275112573  
"11234", "RNF34", 79.7578817367383, -0.0964986350653571, 0.227190214972302, -0.424748200872656, 0.671020242029832, 0.921128275112573  
"11235", "AC016355.1", 3.43622473748074, -0.385257675164074, 0.908873471322149, -0.42388482810884, 0.671649809423634, 0.921128275112573  
"11236", "DLGAP1-AS2", 10.1563430887561, -0.269229637692964, 0.633697508073498, -0.424855130820142, 0.670942285267573, 0.921128275112573  
"11237", "AC027575.2", 6.99020595653479, -0.270621848487417, 0.638208796444091, -0.42403340410731, 0.671541452071394, 0.921128275112573  
"11238", "ZNF121", 46.8022103795369, 0.122256920470999, 0.288398191344249, 0.42391708457376, 0.671626284013419, 0.921128275112573  
"11239", "AL021707.1", 2.55245185971648, 0.46590133977235, 1.09840122378336, 0.424163165229902, 0.671446822103534, 0.921128275112573  
"11240", "MIRLET7BHG", 37.8179215556475, -0.189900704315557, 0.447657613246622, -0.424209705579023, 0.671412883224186, 0.921128275112573  
"11241", "AC068870.2", 6.78310542179513, -0.236868883564636, 0.55909784653515, -0.423662664831503, 0.671811847143467, 0.921194963720026  
"11242", "XYLT2", 49.3199658753956, -0.121408892425174, 0.286575387409208, -0.423654290491497, 0.671817955377264, 0.921194963720026  
"11243", "WRAP53", 25.9906278775564, -0.162648429250709, 0.384110041436031, -0.423442273580333, 0.671972607482716, 0.921325068428895  
"11244", "FBX048", 26.0579620167123, 0.146700979740765, 0.347031311748223, 0.422731248663807, 0.672491353762425, 0.921342679635737  
"11245", "PLCL2", 90.135733414211, 0.121091838396433, 0.286458990729712, 0.422719629389079, 0.672499832194896, 0.921342679635737  
"11246", "SEMA3D", 359.474969140049, 0.162221199478791, 0.383979789699505, 0.422473275496459, 0.672679603201332, 0.921342679635737  
"11247", "AC090136.3", 5.2959190560596, 0.315413602163413, 0.745819089857886, 0.42290899556287, 0.672361659371808, 0.921342679635737  
"11248", "TAF10", 488.864965065604, -0.110121849052643, 0.260180388585717, -0.423251920143715, 0.672111469366983, 0.921342679635737  
"11249", "C1QTNF4", 249.30580100973, -0.299662617895418, 0.708682715261231, -0.422844541629547, 0.672408687553058, 0.921342679635737  
"11250", "AL354811.1", 3.75385847769623, 0.315237905312162, 0.745925206031

389,0.42261328986233,0.672577428688188,0.921342679635737  
"11251","AL008727.1",2.85161648248734,0.377419046410247,0.892286621447  
08,0.422979609173296,0.672310138313984,0.921342679635737  
"11252","CD70",120.358200495418,-0.315086104915618,0.744834277521133,-  
0.423028470123917,0.672274489318826,0.921342679635737  
"11253","S1PR2",219.81603616001,-0.0905568242643634,0.214389707037118,  
-0.422393525864024,0.672737802644715,0.921342679635737  
"11254","ZNF473",16.5922555897327,0.161049793605161,0.381248707551218,  
0.422427120185123,0.672713286044581,0.921342679635737  
"11255","DDT",464.979207552167,-0.0914280873427913,0.216469697699468,-  
0.422359749722217,0.672762452285427,0.921342679635737  
"11256","EP300",262.074127932286,0.0942382374913387,0.223029350985712,  
0.422537379384546,0.672632823083032,0.921342679635737  
"11257","NBEAL2",15.3496357773141,-0.232828613916935,0.551554295723843  
, -0.422131811359347,0.672928809629548,0.921406786324346  
"11258","TPSB2",24.538250436229,-0.306081446819116,0.725038222688123,-  
0.422159049331634,0.672908929567848,0.921406786324346  
"11259","CCNT2-  
AS1",2.74014548380383,0.381787252080091,0.904863512509239,0.4219279999  
71369,0.67307757182432,0.921504081346233  
"11260","SHLD3",9.46892215853789,-0.226574958743426,0.537072093291705,  
-0.421870660519247,0.673119426270424,0.921504081346233  
"11261","ELOA",130.602753445775,-0.08652431784421,0.205755780886263,-0  
.42051949875488,0.67410598810551,0.921519611306852  
"11262","EXTL2",148.98346980626,0.0847481137563545,0.201333616707234,0  
.420933747390977,0.673803461398979,0.921519611306852  
"11263","NTPCR",271.98020612489,0.1166528778262,0.277344500162276,0.42  
0606421825368,0.674042503621768,0.921519611306852  
"11264","AC007038.1",3.45454973298561,-0.366348289199287,0.87094598753  
3602,-0.420632616078449,0.674023373038052,0.921519611306852  
"11265","SNX25",11.5315734107257,-0.21276719996108,0.506089793663004,-  
0.420413931727613,0.674183092370632,0.921519611306852  
"11266","FAM149A",83.2318369988128,0.105646446218928,0.250672602704978  
,0.421451906107447,0.673425123186616,0.921519611306852  
"11267","MRS2",58.7689189747964,0.105133176451405,0.250138655866528,0.  
420299597785891,0.674266603693155,0.921519611306852  
"11268","SAYSD1",138.101166113474,0.105953256586502,0.251543015921636,  
0.42121327121048,0.673599354329743,0.921519611306852  
"11269","CBX3",596.512737942495,-0.0601497572334246,0.142775036968346,  
-0.421290433612425,0.673543014913417,0.921519611306852  
"11270","TMEM67",48.9192263013608,0.123528322529269,0.293650009240917,  
0.420665140956708,0.673999619269608,0.921519611306852  
"11271","UQCRB",2286.63889269394,-0.100172730939338,0.238182356211197,  
-0.420571584448155,0.674067946909396,0.921519611306852  
"11272","CNTRL",93.5960125165046,0.106691397552652,0.253379672480535,0  
.421073231755987,0.673701607523401,0.921519611306852  
"11273","RCN1",685.191128633196,-0.0790700935006021,0.188107722797316,  
-0.420344748874554,0.674233624143092,0.921519611306852  
"11274","NEU3",12.4903857516715,0.217073871541109,0.515531358574042,0.  
421068220062374,0.673705267044435,0.921519611306852

"11275", "TLCD5", 52.8262697178139, 0.117294279837899, 0.27860603959166, 0.421004081640915, 0.673752101375799, 0.921519611306852  
"11276", "MYL6", 6073.91082007654, -0.111100650345827, 0.264255742737896, -0.420428518202621, 0.674172438466883, 0.921519611306852  
"11277", "PLEKHJ1", 345.198519810686, 0.099316038181165, 0.235927291328432, 0.420960362923458, 0.67378402581894, 0.921519611306852  
"11278", "DEDD2", 47.7448801153122, -0.104606324660986, 0.24880887324296, -0.420428432867179, 0.674172500795363, 0.921519611306852  
"11279", "TST", 61.0128188724165, 0.141631087264659, 0.33660117426495, 0.420768250657307, 0.673924317709456, 0.921519611306852  
"11280", "KCTD6", 63.4739716906834, -0.104753938649726, 0.24944842705586, -0.419942269775338, 0.674527627600064, 0.921635510643929  
"11281", "SMPD1", 132.316612392168, 0.122298062948759, 0.291228877769332, 0.419937967297407, 0.674530770748285, 0.921635510643929  
"11282", "PRR34-  
AS1", 20.0702434283236, -0.157417984990284, 0.374726678336296, -0.420087477329304, 0.674421550464315, 0.921635510643929  
"11283", "SLC25A13", 59.7525688021507, 0.116278972580527, 0.277017891725785, 0.419752572139381, 0.674666215410145, 0.921738873575059  
"11284", "DDX5", 5662.69995646481, 0.0878579793333787, 0.209431452295719, 0.419507091080678, 0.6748455734154, 0.921902207922579  
"11285", "AL359921.2", 2.95700795319072, 0.347779811970204, 0.829621339960837, 0.419203069181683, 0.675067729237619, 0.922123973965254  
"11286", "PSIP1", 580.132288474634, -0.0749838756975088, 0.178988754070756, -0.418930653418968, 0.675266813779155, 0.922164340511352  
"11287", "RAB1B", 316.798113501241, -0.0826953867710559, 0.197373691597157, -0.418978771192256, 0.675231647109906, 0.922164340511352  
"11288", "TSPAN3", 520.104596720448, 0.0671459930258442, 0.160284694467457, 0.418917060352741, 0.675276748342014, 0.922164340511352  
"11289", "VDAC3", 472.658801028753, -0.102328474226059, 0.244557346491671, -0.41842322749255, 0.675637706994063, 0.922248849438191  
"11290", "RABL6", 176.297942644281, -0.0779953282312529, 0.186402999892527, -0.418423138448533, 0.675637772085987, 0.922248849438191  
"11291", "NPTN", 457.65105995544, -0.0758499071063814, 0.181142069321669, -0.418731592227141, 0.675412304333418, 0.922248849438191  
"11292", "TFAP4", 43.7476561645092, -0.12804768917156, 0.305971853337714, -0.418494994800152, 0.675585245278311, 0.922248849438191  
"11293", "ETFB", 753.021126864858, -0.113719360069425, 0.271723741595709, -0.418510945718631, 0.675573585412274, 0.922248849438191  
"11294", "SEC22B", 336.041965468312, 0.0745038505126168, 0.1781395516913, 0.418233063939249, 0.675776723675475, 0.922285012741432  
"11295", "TSHZ1", 151.863450436434, 0.0754293443921612, 0.180356666473519, 0.418223212188478, 0.675783925975639, 0.922285012741432  
"11296", "LINC01504", 36.2621949129547, 0.134630152644992, 0.322055460355024, 0.418034063128693, 0.67592221256243, 0.922392077430052  
"11297", "ZNF436-  
AS1", 10.924457829535, -0.196859899246281, 0.471097176239363, -0.41787535390842, 0.676038253066353, 0.922428397855006  
"11298", "MAGI2-  
AS3", 538.01308178989, 0.0785915065819229, 0.188139497510742, 0.4177299696

32961,0.676144557769346,0.922428397855006  
"11299","AL355377.3",2.51779505335734,0.455195640408969,1.089695284423  
22,0.417727457313816,0.676146394829032,0.922428397855006  
"11300","HOXC-  
AS2",17.5949679899817,0.159919218807447,0.382958891931589,0.4175884727  
49224,0.676248026218581,0.922428397855006  
"11301","PRR34",3.76829711106571,0.378160749042687,0.90550131569532,0.  
417625841606098,0.676220699950725,0.922428397855006  
"11302","SPATA7",96.909762750725,-0.0903209887439095,0.216377684406922  
, -0.417422845574275,0.676369147514261,0.922511980970831  
"11303","DTX3L",109.161486794432,0.0914313600404274,0.219090091491014,  
0.417323117710128,0.676442081422315,0.922529831471732  
"11304","LINC01006",12.1874992660892,0.238717439508515,0.5723436336621  
6,0.417087612176401,0.67661432556389,0.922683105853446  
"11305","ZNF710-  
AS1",5.19016426519832,0.302114328749293,0.72475423771123,0.41685072405  
1464,0.676787597974669,0.922837755221541  
"11306","NUDCD1",56.578782387251,-0.0986527070298129,0.236805127836459  
, -0.416598694171622,0.676971964646226,0.923007503539853  
"11307","MRFAP1",1485.00366567958,0.0876241170824155,0.210539121474213  
, 0.41618924059749,0.677271532275202,0.923170985058116  
"11308","PINX1",52.0921788705323,-0.113754197737039,0.273277640255791,  
-0.41625870902048,0.677220703646526,0.923170985058116  
"11309","DPM1",206.589243376909,0.0943560335854757,0.226639642958159,0.  
41632625410946,0.677171283691434,0.923170985058116  
"11310","KAT7",87.1815791399142,-0.0945960170449805,0.227371943102395,  
-0.416040852509141,0.677380109735812,0.923237346735415  
"11311","CDC42EP5",226.695379441603,-0.100437055197125,0.2415737856239  
99,-0.41576139951481,0.677584607260685,0.923434419673191  
"11312","TMEM150C",71.2444821814593,-0.167708805797218,0.4038363193619  
45,-0.415289060830872,0.677930308285088,0.923578939656618  
"11313","ELMOD2",84.4655482363223,0.0884751387409233,0.213029874310959  
, 0.415317987803797,0.677909134907514,0.923578939656618  
"11314","POLE3",183.448501961418,-0.0901426494387262,0.217021538492472  
, -0.415362687339225,0.677876417150524,0.923578939656618  
"11315","PWWP3A",277.840346781103,0.089257347085928,0.214842659244984,  
0.415454488413069,0.677809225398999,0.923578939656618  
"11316","Z92544.2",2.40921204227671,-0.409114824597855,0.9858455567596  
06,-0.414988759438732,0.678150131817198,0.923796772884597  
"11317","KRB0X1",23.366231023718,-0.178990106838045,0.431526529694937,  
-0.414783552159772,0.678300361293928,0.923826639384639  
"11318","AC127070.2",3.1585501000706,0.353161532944638,0.8515801019342  
91,0.414713227965827,0.678351847628591,0.923826639384639  
"11319","NSMCE3",186.758227129136,-0.0960462466924497,0.23154948907888  
6,-0.414797921060098,0.678289841599699,0.923826639384639  
"11320","C2orf92",2.60526291826002,0.360127011786417,0.869153511212089  
, 0.414342238903457,0.678623484081582,0.923909079823062  
"11321","GET4",3.42469854194282,-0.323095325644087,0.779895156510234,-  
0.414280461863398,0.678668720997396,0.923909079823062  
"11322","AP3B2",2.88894585873333,0.367804539487856,0.887915943862028,0

.414233511663362,0.678703101571136,0.923909079823062  
"11323","GPT2",4.69181152014748,0.307490511950106,0.742355615055917,0.  
414209181844667,0.678720918012268,0.923909079823062  
"11324","IRF8",31.4357932075357,-0.19118095605546,0.461634275121073,-0  
.414139431057885,0.678771996691286,0.923909079823062  
"11325","DNAJC5",50.0977506001216,0.0975733569589472,0.23541369209903,  
0.414476133860139,0.678525442004251,0.923909079823062  
"11326","EFNA4",55.8338877283554,0.150717461675535,0.364096984301479,0  
.413948668003078,0.678911700498099,0.924017646404574  
"11327","PAMR1",449.012215387913,0.125172230866762,0.302493452366392,0  
.413801455494475,0.679019517950647,0.924050336652451  
"11328","AL008721.2",3.69747387403217,0.346259694666482,0.836877029502  
354,0.413752179185016,0.679055609056047,0.924050336652451  
"11329","PMVK",321.039157756615,-0.109167442021412,0.264393290957726,-  
0.412897928029749,0.679681399189956,0.924204030486805  
"11330","CCDC138",17.7103929816587,0.179499747428386,0.434433447317338  
,0.413181233021562,0.679473836830097,0.924204030486805  
"11331","HBEGF",30.3209470320913,0.192636001955187,0.466519190468961,0  
.412921924522638,0.679663817306307,0.924204030486805  
"11332","SMIM29",95.0024233059953,0.101644168823806,0.245933518133451,  
0.413299372916917,0.679387289247634,0.924204030486805  
"11333","BPGM",83.1809373697127,-0.0906498845259801,0.219456483109516,  
-0.413065420722808,0.679558683349619,0.924204030486805  
"11334","AP006621.3",44.7263091990981,0.113630594716763,0.275257658315  
01,0.412815379642307,0.679741882531133,0.924204030486805  
"11335","CSRP2",50.0597461804549,0.11216326968934,0.271726778501976,0  
.412779595399812,0.679768102345728,0.924204030486805  
"11336","TXNRD1",289.74988775421,0.0887570615996985,0.214730732676915,  
0.4133412134035,0.679356638524229,0.924204030486805  
"11337","ZNF433",15.1667832556501,0.163164259181364,0.394812612657782,  
0.413270128537641,0.679408712864351,0.924204030486805  
"11338","ZNF275",64.9849806943496,0.111657946799329,0.270351027846197,  
0.413010994220638,0.679598558748898,0.924204030486805  
"11339","TMEM14A",209.2856258046,-0.0905145669201163,0.219631052725107  
, -0.412120990165291,0.680250744418227,0.924277819947989  
"11340","AL359546.1",2.3971564021885,0.444239166850054,1.0778676360210  
1,0.412146308140374,0.680232188362389,0.924277819947989  
"11341","MRGPRF-  
AS1",2.92057018645809,-0.346544356892576,0.840457047691634,-0.41232845  
609943,0.6800986941485,0.924277819947989  
"11342","PFKM",79.0257938618736,-0.0888082713424926,0.215527384608771,  
-0.412050986020635,0.680302052879006,0.924277819947989  
"11343","EMC7",584.438733854267,-0.0981077285661216,0.238029443251994,  
-0.412166357345373,0.680217494032051,0.924277819947989  
"11344","AC080038.1",38.8620380541502,-0.115914285935596,0.28098997070  
1654,-0.412521079119476,0.67995753378606,0.924277819947989  
"11345","HEXD",83.6636248231975,0.0820399772794751,0.198925397278907,0  
.412415802113239,0.68003468278249,0.924277819947989  
"11346","CR381653.1",3.17480457334893,0.370930660153159,0.899528764175  
539,0.412361088300645,0.680074779429911,0.924277819947989

"11347", "IARS", 125.000739421154, -0.0911104439406001, 0.221430903518817, -0.411462187493887, 0.68073366225514, 0.924675844510996  
"11348", "TMEM260", 75.4175657684145, 0.118707742367139, 0.288547248365741, 0.411397935830163, 0.680780767244064, 0.924675844510996  
"11349", "CILP", 3788.72034403592, -0.119377926620702, 0.290200467815802, -0.411363660159481, 0.680805896364735, 0.924675844510996  
"11350", "AP005329.3", 19.443798445248, -0.153130897264906, 0.372287753625504, -0.411324024960932, 0.680834955251366, 0.924675844510996  
"11351", "DR1", 185.685311901456, 0.0629189865015427, 0.153447433434241, 0.410036095706392, 0.681779469254186, 0.924701311224567  
"11352", "ACBD6", 278.205571965314, -0.076044565630545, 0.185532961169669, -0.409870920784812, 0.681900637828248, 0.924701311224567  
"11353", "ASB1", 87.7836879983432, 0.0907305068053584, 0.220731381141686, 0.411044892375856, 0.681039617120686, 0.924701311224567  
"11354", "ARF4-AS1", 10.6826351983621, 0.211457021303605, 0.515120619618733, 0.410500013492209, 0.68143919359468, 0.924701311224567  
"11355", "TMEM44-AS1", 56.2662833449063, 0.118217571368771, 0.287921026546872, 0.410590267708446, 0.681373001217746, 0.924701311224567  
"11356", "MFSD8", 60.2257467182141, 0.114650862473907, 0.279302394964413, 0.410490080074378, 0.681446478905955, 0.924701311224567  
"11357", "HCG18", 139.902132297321, 0.110292081821238, 0.26911931811092, 0.409825955993914, 0.681933624399111, 0.924701311224567  
"11358", "ANKRD6", 37.9438438824328, 0.113796121311972, 0.277383352664674, 0.410248561129544, 0.681623621508486, 0.924701311224567  
"11359", "C9orf170", 2.70383475362959, 0.411957589787735, 1.00540140869011, 0.409744392863399, 0.681993461389043, 0.924701311224567  
"11360", "TOR1B", 58.5524966756852, 0.0888738208956195, 0.216302348375058, 0.410877743876902, 0.681162182754958, 0.924701311224567  
"11361", "EXOC6", 21.4993844046418, 0.175194149721734, 0.426895803012309, 0.410390892778777, 0.681519225921961, 0.924701311224567  
"11362", "C11orf95", 113.355072794782, 0.0840875396392018, 0.204700469353665, 0.410783326021212, 0.681231420626348, 0.924701311224567  
"11363", "AHNAK2", 846.068545403276, -0.104633411200705, 0.255322259776436, -0.409809200703158, 0.681945916385021, 0.924701311224567  
"11364", "RRAD", 33.8080594546872, -0.373350270626563, 0.909771274496063, -0.41037816986843, 0.681528557510373, 0.924701311224567  
"11365", "WDR45B", 241.951411664226, 0.0967993884976552, 0.235813651366363, 0.410491029407227, 0.681445782650328, 0.924701311224567  
"11366", "CCDC102B", 80.2850964785421, -0.151780187651794, 0.370174156264293, -0.410023728245977, 0.681788541458303, 0.924701311224567  
"11367", "LINC00909", 66.5004357625143, -0.113390435591662, 0.275753966001962, -0.411201467872471, 0.680924812031701, 0.924701311224567  
"11368", "DUS3L", 50.7939488172337, -0.11037642243697, 0.269065646379081, -0.410221163208117, 0.681643717683045, 0.924701311224567  
"11369", "PRKD2", 53.0843154989871, -0.100738188593181, 0.245322536105069, -0.41063568880617, 0.681339690345318, 0.924701311224567  
"11370", "PMF1", 286.484558204781, 0.120534413530509, 0.29443978815308, 0.409368632841981, 0.682269155256037, 0.924912411245433

"11371", "LSS", 83.7031447294198, 0.107239649755292, 0.261929154490179, 0.409422349199821, 0.682229741145659, 0.924912411245433  
"11372", "TIGD6", 25.7831288074528, -0.12499047063469, 0.305584746030946, -0.409020647326528, 0.682524508887133, 0.925088056929327  
"11373", "C6orf163", 4.13168903118689, 0.32971008481342, 0.806214528941561, 0.408960733126802, 0.682568477915667, 0.925088056929327  
"11374", "SLC35B4", 98.2096976176985, 0.0873309528103069, 0.213593638497864, 0.408864952273286, 0.682638770520344, 0.925088056929327  
"11375", "AL512506.1", 2.51147129883443, -0.359540549884669, 0.879277761477951, -0.408904404997493, 0.682609816229559, 0.925088056929327  
"11376", "MY09B", 128.183006895088, -0.100855916300785, 0.246774344032636, -0.408696927940964, 0.682762088537255, 0.925173839205501  
"11377", "AC009228.1", 2.72001642988224, -0.35215494226807, 0.861830247284057, -0.408612883311811, 0.682823774548825, 0.925176099557892  
"11378", "TMEM154", 11.7361547091196, 0.193989875136405, 0.47496585042139, 0.408429100669653, 0.682958672383594, 0.925277547441826  
"11379", "ZNF768", 51.8990760684411, -0.0940650376729925, 0.230498010772352, -0.408094791611431, 0.683204083694834, 0.925528688826422  
"11380", "LBR", 91.6366480922832, -0.0846569712763569, 0.207629403997415, -0.407731128859817, 0.683471081138163, 0.925583119624633  
"11381", "AL022069.3", 12.1157480622936, -0.210560384979891, 0.516333006789744, -0.407799583236082, 0.683420819614974, 0.925583119624633  
"11382", "ZFAND4", 13.508511948557, 0.171099018773576, 0.419557974696617, 0.407807809867749, 0.683414779437614, 0.925583119624633  
"11383", "AL162458.1", 13.402161356269, 0.175871739624882, 0.431361688288169, 0.407712934180171, 0.683484440524632, 0.925583119624633  
"11384", "ZC3H8", 73.5393358918222, -0.0863393872974846, 0.211831302954838, -0.407585593314752, 0.683577942929489, 0.925594315350883  
"11385", "ACAA2", 581.380592511822, -0.092474896061073, 0.226911030316667, -0.407538125987173, 0.683612797941603, 0.925594315350883  
"11386", "WASL", 395.900888865061, 0.0700167590520877, 0.171841680090407, 0.407449223117764, 0.683678080670876, 0.925601406423815  
"11387", "CNTLN", 237.807041750121, -0.0820353651959389, 0.201540563346861, -0.407041460208446, 0.683977537468348, 0.925681627750182  
"11388", "AC023509.2", 4.2662424384426, 0.342375720343035, 0.840714187763537, 0.40724389492441, 0.683828865323674, 0.925681627750182  
"11389", "AL163051.1", 3.781451967462, -0.370181694821919, 0.909169458553317, -0.407164683480412, 0.683887038348939, 0.925681627750182  
"11390", "MPV17L", 27.433236902411, -0.145057424941213, 0.35631012727022, -0.407110025338132, 0.683927180479799, 0.925681627750182  
"11391", "C16orf87", 86.2887709161469, -0.0942351670841493, 0.231783204994332, -0.406565985169001, 0.684326784113568, 0.925991693917719  
"11392", "ARHGAP8", 4.2288998518793, -0.329555811485623, 0.810455739266218, -0.40663023965257, 0.684279583865927, 0.925991693917719  
"11393", "YAF2", 128.84078369804, -0.0828712774657428, 0.203901004715624, -0.40642898048159, 0.684427429537395, 0.926046592321509  
"11394", "RTF1", 604.36446729292, -0.0826697649988905, 0.203594988924213, -0.40605009698772, 0.684705791451059, 0.926260620905491  
"11395", "CHMP6", 117.590658029906, -0.0977204227173643, 0.240649930412494, -0.406068776125816, 0.684692067071165, 0.926260620905491

"11396", "ZNF662", 45.4140260378622, 0.104390133585074, 0.257257924993024, 0.405780049683232, 0.684904218648017, 0.926447747495541  
"11397", "ITM2A", 4429.07291224777, -0.119013274735165, 0.293451070227454, -0.405564289279701, 0.685062772174099, 0.926580910157387  
"11398", "AC004837.4", 4.12991954175794, -0.32359289120417, 0.798208567583 844, -0.405398919963584, 0.685184304736812, 0.926663981182484  
"11399", "GUF1", 49.4251512623744, 0.114884722970595, 0.283645258363047, 0.405029590953183, 0.685455759964914, 0.926929841481271  
"11400", "PPID", 135.118547807025, -0.0836250924900996, 0.206539826029692, -0.404886041097361, 0.685561279450404, 0.926929841481271  
"11401", "MED7", 76.4579359494825, -0.11308975720098, 0.279287657888763, -0.404922143913793, 0.685534740702102, 0.926929841481271  
"11402", "NAA35", 82.5572616634656, 0.102918418279692, 0.254283749511724, 0.404738480053548, 0.685669753840589, 0.926995198689061  
"11403", "SNHG3", 104.191144795052, -0.0991797770740188, 0.245322674445664, -0.404282960383207, 0.686004654208567, 0.927122720026745  
"11404", "AC036214.2", 3.23808416599584, 0.370944860755313, 0.916996930262 193, 0.404521376804665, 0.685829361551513, 0.927122720026745  
"11405", "TM2D3", 287.285015949687, 0.0794546055963209, 0.196456406432279, 0.404438862744392, 0.685890027057724, 0.927122720026745  
"11406", "SSR4", 1556.06391585422, 0.10042853452734, 0.248410213605331, 0.4 04285045569418, 0.686003121028535, 0.927122720026745  
"11407", "XRRA1", 156.309353031159, -0.141516952421945, 0.350155062492083, -0.404155094645088, 0.686098672836126, 0.927168496692284  
"11408", "HOXD- AS2", 139.971352910421, -0.153896991713466, 0.381122301602502, -0.40379949 1833401, 0.686360170206287, 0.927265591605151  
"11409", "FKBP7", 281.319444169855, -0.104081206443363, 0.257779546150509, -0.40376053103373, 0.686388822843908, 0.927265591605151  
"11410", "AC019131.2", 6.75993841540702, 0.29503042737529, 0.7304395450854 82, 0.403908070640894, 0.68628032131782, 0.927265591605151  
"11411", "TMEM87A", 422.014428183661, -0.0560249772730311, 0.1387683621289 1, -0.403730190466514, 0.686411136283255, 0.927265591605151  
"11412", "CCDC85A", 30.9284426923226, 0.213974031192267, 0.530223096487301, 0.4035547161371, 0.68654019116997, 0.927277407069578  
"11413", "OGDH", 185.526449949068, 0.0846646214099313, 0.209783504095288, 0.40358092870579, 0.686520912213352, 0.927277407069578  
"11414", "AL162258.2", 3.8108072287486, 0.379002809873346, 0.9395254536919 04, 0.403398128687242, 0.686655363171188, 0.927351710468185  
"11415", "TNC", 77.0932570280383, 0.442236541107759, 1.09661459311867, 0.40 3274353526592, 0.686746406477267, 0.927393417069388  
"11416", "DHX37", 28.8458340177461, 0.123717952810571, 0.307115067945441, 0.402839084510661, 0.687066606396633, 0.927744546041003  
"11417", "FZR1", 75.0343504582578, 0.0927575550246073, 0.230358952493792, 0.402665292668003, 0.687194469765118, 0.927835924623745  
"11418", "MIR34AHG", 10.7302469226663, 0.279150137633008, 0.69371933401811 1, 0.402396363982153, 0.687392345522752, 0.927836865346859  
"11419", "CCDC66", 226.934083497826, -0.0893343586509741, 0.22223564611919 1, -0.401980331287905, 0.687698501516926, 0.927836865346859  
"11420", "MAML3", 31.2392460140353, -0.147650936123721, 0.367063148618663,



-0.402249413157827,0.6875004799117,0.927836865346859  
"11421","ABHD16A",146.49618610527,-0.0801208773387556,0.19933792415265  
2,-0.401934943786207,0.687731905009087,0.927836865346859  
"11422","DPH6",67.4814988015743,0.0830389999427387,0.206552631625589,0  
.402023442108745,0.687666774140495,0.927836865346859  
"11423","VPS35",423.152707150697,0.0585356083695147,0.145444909656471,  
0.402458968882247,0.68734627938297,0.927836865346859  
"11424","RSAD1",106.973326247122,-0.0858296938984916,0.213534803202175  
, -0.401947095327724,0.687722961872366,0.927836865346859  
"11425","ZNF57",9.63726243811543,-0.210055687396559,0.522548629168751,  
-0.401983041713663,0.687696506764914,0.927836865346859  
"11426","ZFP92",2.61909279033059,-0.381788033513338,0.949891175159778,  
-0.401928182403757,0.68773688118412,0.927836865346859  
"11427","TRAF3",53.9244273520798,-0.123827499316255,0.308214920755261,  
-0.401756991559083,0.687862877025172,0.927844439039467  
"11428","AC018521.5",66.7883551898978,-0.122091582501253,0.30388704657  
6159,-0.401766326919286,0.687856006010479,0.927844439039467  
"11429","IFI6",876.798094229187,0.137658804915544,0.343008089209768,0.  
401328158856796,0.688178534376043,0.927987019162665  
"11430","SUMF2",389.086052323631,-0.0755783213178779,0.188317743276933  
, -0.401334043211932,0.688174202622315,0.927987019162665  
"11431","MYC",2418.56531729315,-0.143444821590837,0.357377802383536,-0  
.401381453000521,0.688139302394948,0.927987019162665  
"11432","INTS13",43.5020764730363,-0.102242901572175,0.254883315874953  
, -0.401136108972845,0.688319917045777,0.927987019162665  
"11433","RAP2A",143.098798593538,-0.0749161041310653,0.186766049875972  
, -0.401122710368484,0.688329781194026,0.927987019162665  
"11434","SUSD6",55.8993110653496,-0.122927239813539,0.306419177119987,  
-0.401173454510659,0.688292423273873,0.927987019162665  
"11435","SUPT4H1",374.144630245939,-0.0919877997031906,0.2293939127758  
38,-0.40100366478809,0.688417425728655,0.928024015531895  
"11436","PHF23",59.1028153422713,-0.11764573949177,0.293492104204605,-  
0.400848056238522,0.688531995206198,0.928097298540009  
"11437","ACADM",180.481256230784,-0.0836283250818789,0.209297319499247  
, -0.399567109994353,0.689475385301827,0.92830843833044  
"11438","PEX19",123.165544471213,0.0976934414932496,0.244536971322618,  
0.399503768141311,0.689522047793222,0.92830843833044  
"11439","RNF149",239.37631631568,0.0719529490664746,0.179980474654174,  
0.399781971931841,0.689317110235256,0.92830843833044  
"11440","SLC11A1",10.4349538125425,-0.18466502995,0.461035874075221,-0  
.400543732785251,0.688756079248642,0.92830843833044  
"11441","ARAP2",6.82008353050988,-0.27348483241296,0.684499649599318,-  
0.399539769776432,0.689495526068902,0.92830843833044  
"11442","TXNDC5",482.155944625626,0.0824841992672318,0.206063733905129  
, 0.400284891009533,0.688946695033579,0.92830843833044  
"11443","GNRH1",9.51487143556879,0.198348305545847,0.495402127246588,0  
.400378388862102,0.688877839237559,0.92830843833044  
"11444","DOCK8-  
AS1",6.53691621188708,-0.287099037199232,0.717817284413348,-0.39996116  
4816295,0.689185120678615,0.92830843833044

"11445", "ALKBH8", 32.0370935213068, -0.112658310428029, 0.281784708433204, -0.399802782253298, 0.689301781322581, 0.92830843833044  
"11446", "SMARCD1", 114.336688097903, -0.0819089988257354, 0.20496231446354, -0.399629556487594, 0.689429383557534, 0.92830843833044  
"11447", "ZC3H14", 191.244028011168, -0.0657114191390983, 0.164131809002032, -0.40035761220596, 0.688893139828251, 0.92830843833044  
"11448", "TIPIN", 32.9526639592194, -0.123208997495441, 0.307937951972465, -0.400109816624546, 0.689075634188519, 0.92830843833044  
"11449", "IFT140", 38.4041803851334, 0.104853963461707, 0.2622511803582, 0.399822655968565, 0.689287142434425, 0.92830843833044  
"11450", "AC008760.2", 53.8756702912027, 0.191517873189134, 0.479405175286691, 0.399490625178594, 0.689531730060561, 0.92830843833044  
"11451", "DHDDS", 73.5445689702067, -0.101600525023181, 0.257070490760063, -0.395224378818379, 0.69267730248522, 0.928603479093633  
"11452", "SRSF4", 447.262199415737, -0.0751297558079776, 0.190346344739534, -0.39470028127298, 0.693064095165245, 0.928603479093633  
"11453", "NFYC-AS1", 2.74962469328653, -0.345135413341524, 0.874264576105572, -0.394772272346818, 0.693010959815876, 0.928603479093633  
"11454", "GSTM4", 81.0446706607427, 0.0948397077255507, 0.238583005454312, 0.397512419398674, 0.690989630055545, 0.928603479093633  
"11455", "RRP15", 140.443435054333, -0.103227675103741, 0.259531336826072, -0.397746477809423, 0.690817073548651, 0.928603479093633  
"11456", "JMJD4", 56.0444779713389, 0.121113218529627, 0.305714566987456, 0.396164369016138, 0.691983774879856, 0.928603479093633  
"11457", "CEBPZOS", 201.83196433616, 0.0743726015208766, 0.187822040438128, 0.395973770423266, 0.692124378243228, 0.928603479093633  
"11458", "OGG1", 82.0152078018603, 0.0829273057740849, 0.209528470186427, 0.395780610149546, 0.692266882169087, 0.928603479093633  
"11459", "RAB5A", 289.0825224679, -0.06472374812347, 0.162491871966506, -0.398319911883416, 0.690394384668766, 0.928603479093633  
"11460", "RPP14", 77.6590587474737, 0.0996213353042353, 0.25193257685034, 0.395428556916699, 0.692526637341698, 0.928603479093633  
"11461", "U2SURP", 526.838349312137, 0.056611654073036, 0.14278720727325, 0.396475672814995, 0.691754150889858, 0.928603479093633  
"11462", "AC069224.1", 6.9789152520631, 0.26674940574769, 0.674697409171363, 0.395361538552965, 0.692576089548931, 0.928603479093633  
"11463", "ZNF639", 103.46685574836, 0.080028536666471, 0.2026593632085, 0.394891878665937, 0.692922683827484, 0.928603479093633  
"11464", "C6", 13.536058633278, 0.214339928985532, 0.540410181444749, 0.396624520308831, 0.691644367975776, 0.928603479093633  
"11465", "AC109454.2", 5.8667104294049, 0.283053464393512, 0.712788143981935, 0.397107424952744, 0.691288244843367, 0.928603479093633  
"11466", "LRRTM2", 4.04007669743023, -0.329852902514127, 0.828248557345159, -0.398253518933286, 0.690443319203131, 0.928603479093633  
"11467", "LINC00847", 42.9319456920326, 0.112423329153455, 0.282298385802622, 0.398242904697511, 0.690451142483304, 0.928603479093633  
"11468", "TRIM38", 275.075593260219, -0.0859489354047607, 0.217304255288494, -0.395523480617784, 0.692456596296599, 0.928603479093633  
"11469", "HIST1H2BN", 4.66241601220888, 0.311467985026747, 0.7861933726514

86,0.396172234289259,0.691977972946219,0.928603479093633  
"11470","CDC40",286.669666744807,0.0602637046100278,0.152508072669487,  
0.3951509159822,0.69273151445111,0.928603479093633  
"11471","AC104248.1",8.90444082580836,0.267144633078585,0.672009647256  
431,0.39753094939818,0.690975968470046,0.928603479093633  
"11472","SHB",12.0092256830986,-0.193168701527678,0.487073774838322,-0  
.396590232335539,0.691669656598545,0.928603479093633  
"11473","ARRDC1",56.5722328410182,0.12004984992979,0.302151112224016,0  
.397317253099449,0.691133526136878,0.928603479093633  
"11474","AL022344.1",6.68324237381166,-0.219774917449698,0.55627426219  
0804,-0.39508374265627,0.692781086444675,0.928603479093633  
"11475","NT5C2",83.4670020518089,0.0872758543908596,0.221076525648702,  
0.394776669005301,0.693007714768263,0.928603479093633  
"11476","VTI1A",75.796861002422,-0.0928015577610103,0.234727460981335,  
-0.395358759358751,0.692578140317958,0.928603479093633  
"11477","UROS",223.830634694324,-0.0948161969907344,0.239746473378411,  
-0.395485262638581,0.692484795757421,0.928603479093633  
"11478","PIK3C2A",158.293048009808,0.078504853208712,0.198635230742859  
,0.395221194725217,0.692679652156996,0.928603479093633  
"11479","SLC39A13",213.090226538178,-0.0824785284256967,0.206808663250  
423,-0.3988156353287,0.690029055527223,0.928603479093633  
"11480","SSH3",60.8535969223892,-0.109221439985938,0.274070402573815,-  
0.398515997934222,0.690249868151087,0.928603479093633  
"11481","TSFM",97.609495229674,-0.0980550619297433,0.24725713737277,-0  
.39657120911302,0.691683687062804,0.928603479093633  
"11482","PHLDA1",289.008793471612,-0.183416219082686,0.463458281689275  
, -0.39575561885343,0.692285320285313,0.928603479093633  
"11483","AC024941.2",6.13962706711356,0.286365716810076,0.721209180330  
921,0.397063327284158,0.691320762302977,0.928603479093633  
"11484","CHPT1",598.338275040096,-0.115915208408919,0.293160925513475,  
-0.395397879870558,0.692549273476918,0.928603479093633  
"11485","ENOX1",5.24807665111571,0.256156517127754,0.648977359634699,0  
.394707940615897,0.693058441866753,0.928603479093633  
"11486","HSP90AA1",4728.65573896535,0.0772475769683816,0.1953395656148  
73,0.395452793832259,0.692508753477037,0.928603479093633  
"11487","ATP5MPL",975.063554321845,-0.0885238813644754,0.2224210765889  
95,-0.398001316790925,0.690629215103739,0.928603479093633  
"11488","FLYWCH2",243.807335529885,-0.114938658532122,0.28989339868263  
, -0.396485946401128,0.691746573367509,0.928603479093633  
"11489","ALG1",47.9630946816762,-0.12155564566586,0.307010602073956,-0  
.395933055225819,0.692154414959802,0.928603479093633  
"11490","USP7",225.919931826986,0.0773545863963581,0.194261647444194,0  
.398197932603139,0.690484289776786,0.928603479093633  
"11491","KNOP1",190.901326535398,-0.103219240475137,0.259457174292841,  
-0.39782765983043,0.690757226915386,0.928603479093633  
"11492","AC135050.6",19.7734350989998,0.16045474715382,0.4047979112499  
82,0.396382349549059,0.691822985048273,0.928603479093633  
"11493","ITFG1",285.515236075948,-0.0631691857953091,0.159624288330958  
, -0.395736679272374,0.692299293679525,0.928603479093633  
"11494","NKIRAS2",104.581423739314,-0.0770117970818217,0.1929880792347

22,-0.39904950288746,0.689856729185453,0.928603479093633  
"11495","GPATCH8",272.682178283459,0.0791423086447314,0.19857918921959  
7,0.398542812848391,0.690230106286779,0.928603479093633  
"11496","DYNLL2",184.685577708887,-0.0713751608980426,0.1806581212776,  
-0.3950841533903,0.692780783330709,0.928603479093633  
"11497","APBA3",41.5821160091138,0.100060536525592,0.252120093921044,0  
.396876484414318,0.691458545868533,0.928603479093633  
"11498","PODNL1",6.71146375409273,-0.25190010479024,0.632724212577015,  
-0.398119907193498,0.690541800873911,0.928603479093633  
"11499","BX322562.1",4.83585753068812,0.29869514767439,0.7522218308357  
54,0.397083859348413,0.691305621963016,0.928603479093633  
"11500","PCNT",60.8079421037563,0.138885379468985,0.348456702031039,0.  
398572846093843,0.690207972850357,0.928603479093633  
"11501","MICAL3",40.3277001367347,-0.171441478479283,0.432447194528954  
, -0.396444885406244,0.691776859043936,0.928603479093633  
"11502","AL022322.2",3.88886921936051,0.335699534423869,0.849010755772  
252,0.395400802806696,0.692547116674062,0.928603479093633  
"11503","CHKB-  
DT",13.0997778164731,0.21273141009208,0.537857630885112,0.395516207034  
199,0.692461963139233,0.928603479093633  
"11504","UBA1",321.198716947943,0.0667877840702015,0.168004832307127,0  
.397534899163541,0.690973056445355,0.928603479093633  
"11505","GPR173",16.5882498358999,0.170488644437078,0.429616063024736,  
0.396839548402224,0.691485784807177,0.928603479093633  
"11506","GPATCH2",166.664177092573,-0.0659920916810397,0.1672362139787  
76,-0.394604075941438,0.693135104990657,0.928617907477054  
"11507","MTCH1",1162.46839902892,-0.0721782760427969,0.182976225987356  
, -0.394468055362474,0.693235507327605,0.928671708130271  
"11508","HYI",336.444423779251,-0.105589695337069,0.267831970668609,-0  
.394238578290252,0.693404905924196,0.928737216510685  
"11509","SOCS1",571.571183691223,0.155726732219271,0.3949892489673,0.3  
94255622466735,0.693392323488495,0.928737216510685  
"11510","WDR77",44.2376910868752,-0.116409006804183,0.295791773483888,  
-0.393550521818431,0.693912916917704,0.928795457495577  
"11511","YOD1",17.8323251186202,-0.172704087832718,0.438811998893358,-  
0.393571935745288,0.693897104351947,0.928795457495577  
"11512","MTMR14",99.8411061212219,0.0781242648573039,0.198723596003237  
, 0.393130289651316,0.69422325355689,0.928795457495577  
"11513","SLC49A4",43.6303950649899,0.105095264550918,0.266977129026036  
, 0.393648942642831,0.693840241682403,0.928795457495577  
"11514","TCIM",60.1064816800784,-0.306495588783256,0.77843927259561,-0  
.393730891507161,0.693779731707932,0.928795457495577  
"11515","AC009318.3",3.50373986661596,0.310856398402023,0.789224581874  
746,0.393875717433441,0.693672798903831,0.928795457495577  
"11516","AC011611.4",5.17790560662354,0.280359677133073,0.713167659581  
425,0.393118887776856,0.694231674425173,0.928795457495577  
"11517","XRCC3",6.56016550633072,0.251691614649752,0.639934784120075,0  
.393308225924668,0.69409184339676,0.928795457495577  
"11518","CTF1",36.588221567987,0.164981751496904,0.419470437453756,0.3  
93309603647794,0.694090825951413,0.928795457495577

"11519", "CSNK2A2", 283.891226659433, -0.0856060824680052, 0.217533931803299, -0.393529789850959, 0.693928226034983, 0.928795457495577  
"11520", "DHX58", 37.587712994677, 0.112751551217705, 0.286643942249301, 0.393350546091925, 0.694060590302611, 0.928795457495577  
"11521", "ZNF257", 11.0774437512832, -0.256990842818736, 0.652939959534641, -0.393590312655848, 0.693883534499336, 0.928795457495577  
"11522", "CBR1", 477.817230247814, -0.0891538271021179, 0.226739660314585, -0.393199085587512, 0.694172445035335, 0.928795457495577  
"11523", "SMG7-  
AS1", 3.2310530831838, -0.375566371128717, 0.956095197208031, -0.392812736875405, 0.694457796656946, 0.928936735115136  
"11524", "AC022007.1", 3.38582185243157, 0.32451148046156, 0.826062030592677, 0.392841540276015, 0.694436521383574, 0.928936735115136  
"11525", "SLC1A2", 24.274635903504, 0.189470348282061, 0.482500552810069, 0.39268420974565, 0.69455273455505, 0.928983115242178  
"11526", "MMP16", 50.9421491982775, -0.174966195709829, 0.446003963974639, -0.392297400567, 0.694838484073946, 0.929262416313863  
"11527", "CCDC88C", 4.33903323880354, -0.316168763061391, 0.806062876836796, -0.392238337909967, 0.694882119549134, 0.929262416313863  
"11528", "GHRL", 2.643826856128, -0.338038263131563, 0.862112316256555, -0.392104667521031, 0.694980878929331, 0.929313866125575  
"11529", "VPS13D", 133.80716952272, 0.0924943225636425, 0.236064172859541, 0.39181855274022, 0.695192285838195, 0.929357054421012  
"11530", "AC139795.2", 2.7427881955704, -0.391767023961598, 1.00093076483894, -0.391402720071888, 0.695499582048164, 0.929357054421012  
"11531", "MAK", 2.67194822421693, -0.376812438449008, 0.962044544827881, -0.391678785015535, 0.695295567214483, 0.929357054421012  
"11532", "DAXX", 176.831651899436, -0.0739719205806703, 0.189035195095791, -0.391312953882403, 0.695565924936047, 0.929357054421012  
"11533", "TRAM2-  
AS1", 57.849334340842, -0.0963493417017227, 0.246048030267835, -0.391587535152555, 0.695362999362106, 0.929357054421012  
"11534", "USP45", 33.4656884032421, 0.120080363414877, 0.306748752756981, 0.39146161911214, 0.695456053200999, 0.929357054421012  
"11535", "ZNF696", 25.5928814754704, 0.14329859276168, 0.36568669398289, 0.39186165403214, 0.695160437274483, 0.929357054421012  
"11536", "NTN4", 194.172839454386, -0.0909745036579923, 0.232719668413321, -0.390918843595194, 0.695857224919061, 0.929357054421012  
"11537", "AC009133.1", 14.281788462949, -0.188718542304537, 0.482693256149612, -0.390969917023335, 0.69581947232245, 0.929357054421012  
"11538", "AC009107.2", 87.8425851379858, -0.119304962800565, 0.304814745551393, -0.391401546486042, 0.695500449387247, 0.929357054421012  
"11539", "COG1", 58.3162710361936, 0.107691702250136, 0.275287472798613, 0.39119724975251, 0.695651441039094, 0.929357054421012  
"11540", "SLC25A10", 11.2913492794559, 0.179905807265151, 0.46000998516794, 0.391091091641133, 0.695729905152433, 0.929357054421012  
"11541", "C19orf47", 17.1940319588264, 0.156152311490976, 0.399367316675581, 0.390999225451952, 0.695797808378258, 0.929357054421012  
"11542", "LINC01204", 2.41398982907076, 0.396148278097163, 1.01164776915231, 0.391587161240032, 0.695363275682266, 0.929357054421012

"11543", "AMIG01", 6.94040390603487, 0.283812256115683, 0.727263554153408, 0.390246774356874, 0.696354077087729, 0.92944512539693  
"11544", "AC021851.1", 2.97146680864002, -0.348663198235613, 0.893509528623114, -0.390217660882586, 0.696375603252395, 0.92944512539693  
"11545", "PCDHB4", 64.4458228851183, -0.108774126415138, 0.278549463867589, -0.390502013196638, 0.696165366927405, 0.92944512539693  
"11546", "ZNRD1", 164.077386037765, -0.0798433310815718, 0.204633517852609, -0.390177190518126, 0.696405526975968, 0.92944512539693  
"11547", "AC124242.1", 6.9184744148723, 0.2342169568801, 0.600122541285912, 0.390281885393327, 0.696328116720605, 0.92944512539693  
"11548", "AL133215.2", 2.88939641164436, -0.348290508590055, 0.891614473189767, -0.390629043227662, 0.696071454619321, 0.92944512539693  
"11549", "CEP290", 175.346033226798, 0.074986557039639, 0.192098552761499, 0.390354617261167, 0.696274341428121, 0.92944512539693  
"11550", "RFNG", 308.752060519752, -0.0800824788626668, 0.204971249462033, -0.390701032817292, 0.696018235347592, 0.92944512539693  
"11551", "AC011484.1", 12.6724226045762, 0.211820434265987, 0.543012945967228, 0.390083580583309, 0.696474743824386, 0.929457031949867  
"11552", "PPDPF", 1379.42801133832, -0.125191951677572, 0.321075649866652, -0.389914189162481, 0.696600001274195, 0.929543717074249  
"11553", "YY1AP1", 124.111600282398, 0.0671445624511368, 0.172414953945895, 0.389435840189403, 0.696953763803217, 0.929675386117392  
"11554", "CYFIP2", 5.40029787513002, 0.248876599738968, 0.639086859605235, 0.389425312065874, 0.696961550608481, 0.929675386117392  
"11555", "SLC44A1", 566.720474510147, -0.0744574078475979, 0.191263899345317, -0.389291487324375, 0.69706053277618, 0.929675386117392  
"11556", "TANC2", 94.9737341877647, 0.158461001670398, 0.406996871783486, 0.389342062940218, 0.697023124407856, 0.929675386117392  
"11557", "CASTOR1", 32.1125355003778, -0.125925787523155, 0.323450867230762, -0.389319678136199, 0.697039681287776, 0.929675386117392  
"11558", "HDAC8", 101.027725501095, 0.0868644900035925, 0.222988371085376, 0.389547174952611, 0.696871420397502, 0.929675386117392  
"11559", "Z95118.2", 3.18294195620413, 0.457541720383865, 1.17595244964253, 0.38908182088736, 0.69721562088395, 0.929801781808642  
"11560", "EIF2B3", 138.830042709122, -0.101838193013246, 0.261876934381374, -0.38887805546455, 0.697366356195308, 0.929834262176687  
"11561", "PSMB8-AS1", 45.5440937667164, 0.104079785324014, 0.267667844498874, 0.388839330024389, 0.697395004660146, 0.929834262176687  
"11562", "SEC61A2", 21.2463447850105, -0.138825151209402, 0.357056646293334, -0.388804276997978, 0.697420936703655, 0.929834262176687  
"11563", "RLF", 143.429906831208, -0.0848948251672255, 0.218586578385769, -0.388380777054848, 0.697734267642565, 0.929921193876454  
"11564", "MOB3B", 33.5105710524003, -0.221950965915601, 0.571106219682734, -0.388633424512346, 0.697547337527688, 0.929921193876454  
"11565", "HMGA2-AS1", 18.0258086750289, -0.210271549516169, 0.541433602554326, -0.388360730704871, 0.69774910042584, 0.929921193876454  
"11566", "TEX22", 2.84988059640013, -0.357239842244939, 0.919841612528037, -0.388371038425977, 0.697741473477166, 0.929921193876454

"11567","STOML1",92.4002300530688,0.0926878437727046,0.238696424184694,  
0.388308472107594,0.697787768379432,0.929921193876454  
"11568","SIM1",53.3486241236057,0.211936858719814,0.54597612440145,0.3  
88179719309445,0.697883040400571,0.929967761737102  
"11569","KAZALD1",170.042291413288,-0.135806686914557,0.35009297479086  
2,-0.387916058571825,0.698078153864331,0.930009403426807  
"11570","NCOR1",533.10924515942,-0.0575317739004662,0.148318704054227,  
-0.387892911196366,0.698095284271916,0.930009403426807  
"11571","RBFA",159.325161010918,0.0807542531723358,0.208148949693466,0  
.387963779261244,0.698042838256966,0.930009403426807  
"11572","NDUFS4",822.23247990987,-0.102587954894716,0.264719831293193,  
-0.387534074774676,0.698360863817156,0.930282813320208  
"11573","SPCS1",903.827651222335,-0.0961425542977187,0.2484201783644,-  
0.387015881442168,0.698744450675977,0.930582511138676  
"11574","DTNBP1",147.815831952067,-0.0916719710473318,0.23686979572031  
3,-0.387014185445469,0.698745706245057,0.930582511138676  
"11575","TBX1",27.0594185419992,-0.26642580535508,0.688464591535928,-0  
.386985487170368,0.698766952087588,0.930582511138676  
"11576","GUCY1B1",25.6297612864052,0.187347219902301,0.484247556725385  
,0.386883149538626,0.698842716373966,0.930603012517682  
"11577","SAMD9",116.755513208272,-0.0819321070653956,0.211854219820332  
, -0.386738140665218,0.698950076875582,0.930665581328246  
"11578","TRIM45",8.84537050402124,-0.19069297059523,0.493212660531589,  
-0.3866343787479,0.699026902983827,0.930687485705276  
"11579","PHC2",218.314020769364,-0.0702338657119043,0.181694187384586,  
-0.386549876597003,0.699089471292516,0.93069040504138  
"11580","DEAF1",135.379009911096,-0.0948829654814381,0.245563913414618  
, -0.386388065583703,0.69920928745434,0.930769530752042  
"11581","VPS37B",49.2204229170288,0.117253870053721,0.303711826403577,  
0.386069490418565,0.699445204620777,0.930922796514357  
"11582","PRSS36",17.585401505158,-0.200402087245987,0.518989286996501,  
-0.386139159838453,0.699393609255168,0.930922796514357  
"11583","AL365295.1",33.6672418717282,0.154109642974233,0.399333706016  
112,0.385916942778718,0.69955818229259,0.930992780802924  
"11584","ACP6",6.02365133947235,0.30946054530102,0.802453107220716,0.3  
85643151626432,0.699760970296997,0.931101886674856  
"11585","GOSR2",115.898596747575,-0.0822118745160308,0.21314996810774,  
-0.385699680116656,0.699719099769034,0.931101886674856  
"11586","DNPH1",285.179830812993,0.125922707620842,0.326634884027426,0  
.385515184625133,0.69985575854427,0.931147636626956  
"11587","PTPRF",32.258322216372,0.226139437180214,0.586880317462031,0.  
385324623184086,0.699996920670699,0.931177581910494  
"11588","RTN3",793.519219025698,0.0688312250182809,0.178633135763754,0  
.385321708226137,0.699999080063497,0.931177581910494  
"11589","BRAP",63.1006569877762,0.110681334577991,0.287332152384789,0.  
385203443677854,0.700086692159473,0.931186851372857  
"11590","CTSA",631.175809890731,0.0866211861181288,0.224902925530147,0  
.385149218997232,0.700126863925489,0.931186851372857  
"11591","EYA3",63.4351014398638,-0.104035828148081,0.271039361246232,-  
0.383840294154054,0.701096821008712,0.931202944014725

"11592", "SLC16A4", 75.3094752267777, 0.104226464649489, 0.271390298449572, 0.384046390917159, 0.700944064045448, 0.931202944014725  
"11593", "UCK2", 20.6646145825699, 0.12892415818773, 0.335117098629546, 0.384713757414833, 0.70044950132574, 0.931202944014725  
"11594", "MRPL44", 105.33397597234, -0.101061520573232, 0.262824537984561, -0.384520872168976, 0.700592429015683, 0.931202944014725  
"11595", "DZIP1L", 27.0730291121534, -0.169383428673564, 0.441165037593466, -0.38394572153211, 0.701018677727323, 0.931202944014725  
"11596", "MED28", 236.680073776264, 0.0600270557864229, 0.155949741973948, 0.384912825289898, 0.700302003437502, 0.931202944014725  
"11597", "G3BP1", 388.800413725573, 0.0604270312316207, 0.157243970071998, 0.384288384501819, 0.700764716131896, 0.931202944014725  
"11598", "CPSF1", 73.7546450760326, -0.0868247330477675, 0.225915619673928, -0.384323727474375, 0.700738523905838, 0.931202944014725  
"11599", "PLAA", 85.6539917872984, -0.0728196421350136, 0.189437713166655, -0.384398866085084, 0.700682840822278, 0.931202944014725  
"11600", "STAM", 164.267837947787, 0.079455573528168, 0.206964661521413, 0.383908890262153, 0.701045976882905, 0.931202944014725  
"11601", "ERLIN1", 132.217665382568, 0.0717523000284592, 0.186941882905641, 0.383821425745862, 0.701110806697565, 0.931202944014725  
"11602", "CBX5", 367.790799805799, -0.092456219794019, 0.24074816368348, -0.384037071682816, 0.70095097111248, 0.931202944014725  
"11603", "JPT2", 37.616715953258, -0.146952756365198, 0.381782524475607, -0.384912212959573, 0.700302457121858, 0.931202944014725  
"11604", "DHRS13", 7.54928374724677, -0.197328303647088, 0.513150688471418, -0.384542607230819, 0.700576322836031, 0.931202944014725  
"11605", "LINC00672", 8.87801454601488, -0.220207263659765, 0.572356839596001, -0.384737716797791, 0.700431748197826, 0.931202944014725  
"11606", "ASXL3", 8.89700650021723, -0.251604848378266, 0.655652802355511, -0.383747079970291, 0.701165914445599, 0.931202944014725  
"11607", "GAMT", 179.378009346186, 0.122892464947702, 0.320224634739244, 0.383769553044449, 0.701149256433412, 0.931202944014725  
"11608", "CPSF3", 55.2457070386536, -0.0951871600558729, 0.248916875530161, -0.382405410855076, 0.702160677531959, 0.931606472297451  
"11609", "HOXD8", 100.676235074697, -0.137087040488418, 0.357906435894182, -0.383024798494959, 0.70170137710524, 0.931606472297451  
"11610", "SLC35B3", 132.615055921603, -0.0751944096387124, 0.196641842641783, -0.382392722873799, 0.702170087309508, 0.931606472297451  
"11611", "TIAM2", 28.3977526649007, 0.131403104020879, 0.343609417208217, 0.382419972911431, 0.702149877941857, 0.931606472297451  
"11612", "ZFYVE27", 44.4000765156507, -0.122052816277871, 0.318973812328493, -0.382642121580112, 0.7019851343163, 0.931606472297451  
"11613", "CTSF", 1039.8854461709, -0.0921508284821367, 0.240461379348768, -0.383225068124058, 0.701552892558158, 0.931606472297451  
"11614", "MED17", 92.144561283725, 0.0723216529515226, 0.189088219722538, 0.382475719839369, 0.702108535162891, 0.931606472297451  
"11615", "NIPA1", 24.7115940948948, 0.12937124880578, 0.338215230657421, 0.382511599357336, 0.702081926826895, 0.931606472297451  
"11616", "PGBD4", 9.42309481155771, -0.199479894592509, 0.521078044866115, -0.382821530398125, 0.701852096433317, 0.931606472297451



"11617", "PRKCA", 53.6099366676062, -0.150963738752721, 0.394821818586254, -0.382359159616051, 0.702194979021997, 0.931606472297451  
"11618", "DPP9", 80.5151404879198, -0.0934089502767818, 0.244276498328714, -0.38239024595434, 0.702171924270659, 0.931606472297451  
"11619", "UBE2L3", 628.26099429554, -0.0781923306168521, 0.204399152400894, -0.382547235144553, 0.70205549960367, 0.931606472297451  
"11620", "DFFA", 190.743634395409, 0.0740255098521708, 0.193878748432342, 0.381813429531207, 0.702599756780445, 0.931822700745983  
"11621", "TSEN2", 25.7487645707814, -0.139418132321832, 0.365059749484647, -0.381904969032188, 0.702531854405786, 0.931822700745983  
"11622", "SLC26A1", 3.29451347224074, 0.337549808641081, 0.883973940692291, 0.381854931579461, 0.702568971004661, 0.931822700745983  
"11623", "CNPY3", 185.2977662433, -0.0811124238983366, 0.212313361491968, -0.382041070464636, 0.702430901171033, 0.931822700745983  
"11624", "SMC6", 131.378087900921, -0.0748331703592454, 0.19614349303402, -0.38152257412009, 0.702815523902451, 0.932028673516542  
"11625", "GIGYF1", 143.442730706928, 0.0817742289269669, 0.214476994713857, 0.381272728275895, 0.703000887755252, 0.932114113602892  
"11626", "AC125437.1", 2.67335973887828, -0.393661061380613, 1.0323728495015, -0.381316751569647, 0.702968225024185, 0.932114113602892  
"11627", "AC024560.5", 24.3903160334014, -0.155478759376136, 0.408268612516134, -0.380824669371299, 0.703333352655718, 0.932158312679187  
"11628", "PPP1R10", 383.798258564501, -0.0708802799487969, 0.186165090330435, -0.380738836819447, 0.703397047880915, 0.932158312679187  
"11629", "XPNPEP1", 123.956432879483, -0.082176904434845, 0.215626849664853, -0.38110701224162, 0.703123844358554, 0.932158312679187  
"11630", "GSTZ1", 104.185200496221, -0.12942634342633, 0.339825093011156, -0.380861643498707, 0.703305915276158, 0.932158312679187  
"11631", "LMF1", 88.6866737749769, -0.0945819319505847, 0.248291852231842, -0.380930469930479, 0.703254842295758, 0.932158312679187  
"11632", "LIF", 10.4357518437258, -0.229299282125642, 0.602179396503299, -0.380782344027584, 0.703364761485001, 0.932158312679187  
"11633", "C5orf58", 16.3862211594159, -0.197135096549403, 0.518012386729238, -0.380560584263488, 0.703529333444122, 0.93217334322169  
"11634", "C0Q6", 62.2088973998878, -0.0917128718390149, 0.24095400342472, -0.380623980243052, 0.703482284715201, 0.93217334322169  
"11635", "HSPB11", 204.192056849534, -0.0936146763644611, 0.246606187126186, -0.379612034294011, 0.704233426327908, 0.932590590740235  
"11636", "DIPK1A", 84.3517200816554, 0.0892793241782281, 0.235210763130926, 0.379571593535167, 0.704263450471169, 0.932590590740235  
"11637", "XPR1", 64.3290033554968, 0.104666151580374, 0.275867120805525, 0.379407851413216, 0.7043850210737, 0.932590590740235  
"11638", "COPS8", 341.111324147803, 0.0950474929081855, 0.250402300462106, 0.379579152159464, 0.704257838740788, 0.932590590740235  
"11639", "AC069287.2", 2.50196179216737, -0.350371942146207, 0.922344306137843, -0.379871095657682, 0.704041104188425, 0.932590590740235  
"11640", "POUF1", 25.3006562856491, -0.138513374925, 0.365124633556938, -0.3793591617625, 0.704421172240375, 0.932590590740235  
"11641", "CTDSP2", 585.226148334434, -0.0592470664568253, 0.15616614965631, -0.379384819227573, 0.704402121963054, 0.932590590740235

"11642", "GAS7", 1091.81720811603, 0.0992249943443528, 0.261098161055948, 0.380029464562529, 0.703923543500749, 0.932590590740235  
"11643", "RPL38", 6299.3833242631, -0.092123845404196, 0.242864892466035, -0.37932137687245, 0.704449227283769, 0.932590590740235  
"11644", "CALM3", 832.222532584818, 0.0753339507106984, 0.198435124789972, 0.379640201251837, 0.704212514807237, 0.932590590740235  
"11645", "AC018638.7", 6.05221776073796, 0.266857644031242, 0.703693555307461, 0.379224226253777, 0.704521362853539, 0.932605994709086  
"11646", "ZFP91", 383.608001711309, 0.0751746383589129, 0.198340109165042, 0.37901884129931, 0.704673872541564, 0.932727781661361  
"11647", "TTC7A", 110.381902712312, 0.104899280971484, 0.276852771990466, 0.378899153572846, 0.704762752773731, 0.932746157594867  
"11648", "HACD4", 72.0766454303331, -0.139690836966839, 0.368735813447776, -0.378837183350033, 0.704808773510542, 0.932746157594867  
"11649", "AL157893.2", 7.47402859240736, 0.251982637256646, 0.665364766293506, 0.378713526807777, 0.704900607378726, 0.93278760947232  
"11650", "NCAPD2", 34.5943449381206, 0.118754969989078, 0.313983517027873, 0.378220395494634, 0.705266875454282, 0.932843290676633  
"11651", "ZGLP1", 3.51354559852833, -0.297451156752302, 0.786097758745507, -0.378389524003973, 0.705141249338415, 0.932843290676633  
"11652", "ZNF709", 18.7925335762956, -0.153827261287861, 0.406575744754394, -0.378348347811022, 0.705171833655678, 0.932843290676633  
"11653", "JAK3", 4.91551536253995, -0.274587058339219, 0.726039994016097, -0.378198254369347, 0.70528332214447, 0.932843290676633  
"11654", "YWHAH", 812.656482889767, -0.0885678873453643, 0.234128443273228, -0.378287601912621, 0.70521695457428, 0.932843290676633  
"11655", "FBX07", 263.120836024713, -0.0703832791161269, 0.186116420332284, -0.378168025102071, 0.705305777024726, 0.932843290676633  
"11656", "ACOT13", 316.611565380687, 0.119023578856788, 0.314864105284899, 0.378015711727736, 0.705418922229048, 0.93291289345923  
"11657", "RNF180", 7.24960540683016, 0.286995291950748, 0.759497996935648, 0.377874982039044, 0.70552346834269, 0.932933942942836  
"11658", "C16orf58", 122.446853944721, -0.064838719801207, 0.171607568651406, -0.377831352723823, 0.705555881078663, 0.932933942942836  
"11659", "DDX41", 103.629503789093, 0.0761344098003419, 0.201562418325286, 0.377721255941048, 0.705637675660216, 0.932962069671689  
"11660", "CDK15", 13.5998194479894, -0.22504010082239, 0.596169827008221, -0.377476501874837, 0.705819523825742, 0.932962438670367  
"11661", "TCTEX1D2", 93.6409910958184, 0.125347235169494, 0.332016200013611, 0.377533491330709, 0.705777180115057, 0.932962438670367  
"11662", "COX11", 255.250919493812, -0.0783571621875437, 0.207515777731784, -0.377596166633755, 0.705730612817464, 0.932962438670367  
"11663", "AL139424.2", 3.95636925677275, 0.348095728242121, 0.923714150271849, 0.376843559384336, 0.706289867361294, 0.933000662332307  
"11664", "ANP32E", 192.868036430815, -0.0610543639625475, 0.161898885039298, -0.377114171896414, 0.706088759765938, 0.933000662332307  
"11665", "TNFSF4", 13.9161577175509, 0.170092227432499, 0.451620711537395, 0.376626277509451, 0.706451356763501, 0.933000662332307  
"11666", "SCCPDH", 319.002286392062, -0.0799838508006647, 0.212807636029204, -0.37585047366293, 0.707028061654343, 0.933000662332307

"11667", "AC019080.1", 16.131837541863, 0.153147357328989, 0.407339639431075, 0.375969688446937, 0.706939430694881, 0.933000662332307  
"11668", "TRAIP", 10.8556684428821, -0.182929805572505, 0.486691413324537, -0.375864049712591, 0.707017968256888, 0.933000662332307  
"11669", "CCDC126", 74.7371411008402, -0.0965074356284583, 0.25603377092511, -0.376932446371252, 0.706223808107988, 0.933000662332307  
"11670", "NIPSNAP3B", 11.6613112436105, 0.223430239630497, 0.592330761850522, 0.377205193484246, 0.706021121043158, 0.933000662332307  
"11671", "ZSWIM8-AS1", 7.12177379197311, 0.248090578201546, 0.659578911127443, 0.376134794512268, 0.706816688142742, 0.933000662332307  
"11672", "ZW10", 38.3847881855056, 0.101404558586867, 0.269670991137106, 0.376030651866855, 0.706894108602956, 0.933000662332307  
"11673", "RNF6", 97.5987095516429, -0.0704714974800439, 0.187192495468653, -0.376465398912559, 0.706570934333996, 0.933000662332307  
"11674", "CHMP4A", 344.057906661742, -0.075252786368272, 0.200175857234389, -0.375933378819791, 0.706966424888351, 0.933000662332307  
"11675", "RAB15", 3.86281299900668, 0.337037420765756, 0.893530769872964, 0.377197330108367, 0.706026964276317, 0.933000662332307  
"11676", "AC005480.1", 3.47936087449253, -0.316353252139254, 0.84006144022437, -0.376583469959959, 0.706483173978926, 0.933000662332307  
"11677", "CERNA1", 2.69700723035025, 0.328190624826957, 0.871965889470126, 0.376380118523203, 0.706634324334388, 0.933000662332307  
"11678", "UBE2Q2L", 4.56431427407585, 0.328837655107101, 0.875001754637845, 0.375813709360164, 0.707055395101084, 0.933000662332307  
"11679", "CBX4", 84.785108859457, 0.104548036630917, 0.277691592832299, 0.376489743764244, 0.706552838868825, 0.933000662332307  
"11680", "ZNF350", 43.5459206960226, 0.112309365244565, 0.298027481747774, 0.376842311943615, 0.706290794453155, 0.933000662332307  
"11681", "ZNF337", 37.0869968310114, 0.126070390082926, 0.335164576093209, 0.376144733290268, 0.706809299735656, 0.933000662332307  
"11682", "ATP6AP1", 279.250719777483, 0.0801392045984985, 0.21324454814122, 0.375808925935245, 0.707058951499579, 0.933000662332307  
"11683", "VPS41", 117.451577845989, -0.0757766780279162, 0.201755113560892, -0.375587397466612, 0.707223661309708, 0.933020905609156  
"11684", "CHKA", 21.3551289214873, -0.129040985391362, 0.343610759936495, -0.375544076137812, 0.707255872983652, 0.933020905609156  
"11685", "DCAF11", 59.2070235587783, -0.0925943722443263, 0.246463819253259, -0.375691541764104, 0.707146226721661, 0.933020905609156  
"11686", "BBX", 546.941856089989, 0.0582977818016601, 0.155315581046574, 0.375350505138171, 0.707399809548463, 0.933051087891636  
"11687", "NDST1-AS1", 2.74972664324753, 0.481484840216855, 1.28271601850575, 0.375363551456808, 0.707390108167961, 0.933051087891636  
"11688", "AL391069.2", 2.68779907119123, -0.35431397328538, 0.944226361986798, -0.375242619301423, 0.70748003641821, 0.933077067195988  
"11689", "TSN", 188.566667178113, -0.0697380378497513, 0.186097845623165, -0.374738555496048, 0.707854915125328, 0.933353378134958  
"11690", "PFN2", 163.694974540381, -0.0755482090184698, 0.201736355043845, -0.374489808750884, 0.708039937367091, 0.933353378134958

"11691", "RBM28", 131.560896374054, -0.098553803815147, 0.263128689383677, -0.374546021743157, 0.70799812363844, 0.933353378134958  
"11692", "PPP4R3A", 180.036673630608, 0.0801184400727294, 0.213781682672939, 0.374767562267256, 0.707833340496944, 0.933353378134958  
"11693", "AC027097.1", 26.2141089608756, 0.141092067610547, 0.376775537348911, 0.374472473991562, 0.708052831911138, 0.933353378134958  
"11694", "C22orf31", 4.85433990883375, 0.343818185533488, 0.917959019373652, 0.374546334070648, 0.707997891317793, 0.933353378134958  
"11695", "AMY2B", 11.5858403418558, -0.181135428160192, 0.484375588545643, -0.373956558595488, 0.70843663636059, 0.933485990270459  
"11696", "PGM2", 55.4195287769461, -0.101629142627003, 0.271635957913282, -0.374137295399776, 0.708302172570055, 0.933485990270459  
"11697", "SURF4", 413.174981526987, -0.0639833950398719, 0.171013116772331, -0.374143201688165, 0.708297778588411, 0.933485990270459  
"11698", "SLC1A5", 148.108462037086, -0.110665201880155, 0.295951464277761, -0.373930239372939, 0.708456217980804, 0.933485990270459  
"11699", "TP53INP2", 66.9179900323876, -0.183304221301412, 0.490200716284355, -0.373937073553931, 0.708451133300816, 0.933485990270459  
"11700", "FBX02", 2.59908491358242, 0.436201689671119, 1.17713105398661, 0.370563403449284, 0.710962744156342, 0.933660998085701  
"11701", "AHDC1", 175.364558286011, 0.100385050020798, 0.269773060790622, 0.372109245180376, 0.709811513161233, 0.933660998085701  
"11702", "CD2", 9.52587745881363, 0.211831873271643, 0.567889873948965, 0.373015760606219, 0.709136713900212, 0.933660998085701  
"11703", "SMG5", 47.932600649767, 0.0957188869004795, 0.256630269913381, 0.372983619324357, 0.709160635588476, 0.933660998085701  
"11704", "TBC1D8-AS1", 2.99654423564163, -0.324638005925443, 0.872905790837606, -0.371904974549353, 0.709963601227786, 0.933660998085701  
"11705", "PHOSPHO2", 26.3401505390895, 0.127091447585367, 0.343080909322841, 0.370441619255979, 0.711053468268084, 0.933660998085701  
"11706", "CREB1", 245.239457923808, 0.0727657146722327, 0.195476283201039, 0.372248302866472, 0.709707985484845, 0.933660998085701  
"11707", "GASK1A", 59.0659556767363, -0.0832642051928861, 0.224829199308976, -0.370344267776618, 0.71112599397729, 0.933660998085701  
"11708", "NAA50", 234.837848566034, -0.0541342885121092, 0.146313843269519, -0.369987468734524, 0.711391827424337, 0.933660998085701  
"11709", "DHX36", 524.344142869588, -0.0588903801110436, 0.158823786918288, -0.370790681003858, 0.710793442869741, 0.933660998085701  
"11710", "PARL", 206.417074437142, -0.0926052320290046, 0.249319420021346, -0.371432085078155, 0.710315731633007, 0.933660998085701  
"11711", "EIF2B5", 84.6090079407136, -0.0786406168694505, 0.210649285267427, -0.373324869199596, 0.708906669288979, 0.933660998085701  
"11712", "SLC30A5", 118.981633696711, 0.0848283212003912, 0.227849106637309, 0.372300433617329, 0.709669175810791, 0.933660998085701  
"11713", "AC008393.1", 12.5608376475073, 0.161871088028827, 0.433888311218495, 0.373070866035184, 0.709095701427578, 0.933660998085701  
"11714", "OGFRL1", 330.067794419188, 0.0755808039089703, 0.202489557158994, 0.373257786571307, 0.708956591227559, 0.933660998085701  
"11715", "POP7", 176.604422393103, -0.0835566568068597, 0.224833156449207,

-0.371638499082924,0.710162020774868,0.933660998085701  
"11716","RINT1",47.3738261588601,-0.0959519568793547,0.258833818829655  
,-0.370708732395217,0.710854485550343,0.933660998085701  
"11717","FSCN3",2.64941504390268,0.367449918128133,0.993109349873457,0  
.369999454918992,0.711382896536975,0.933660998085701  
"11718","PTPRN2",85.3299905124277,-0.0968315314214816,0.26056299008548  
1,-0.371624271696125,0.710172615142019,0.933660998085701  
"11719","AC034111.1",3.28324594709262,-0.346482167124699,0.93243567075  
5633,-0.371588280019269,0.710199416451525,0.933660998085701  
"11720","SNX30",41.4359566945317,0.139303855648242,0.376569655266987,0  
.369928521058012,0.711435749822552,0.933660998085701  
"11721","DAB2IP",42.848427346628,-0.138839131500073,0.372725868944005,  
-0.372496633768479,0.70952311783614,0.933660998085701  
"11722","PNPLA7",24.7217072037063,-0.192772509037872,0.520936488306171  
,-0.370049926171756,0.711345290919752,0.933660998085701  
"11723","NRP1",234.07915349135,0.105895638234198,0.284417781110664,0.3  
72324254203345,0.709651442398288,0.933660998085701  
"11724","ANKRD2",8.06423542045294,0.229266132482663,0.614219219977708,  
0.373264341176076,0.70895171332874,0.933660998085701  
"11725","FAM180B",326.648032022422,-0.122855084830371,0.33081590571708  
7,-0.371369945359992,0.710362007688095,0.933660998085701  
"11726","UBE2L6",356.289879085624,0.110878613936833,0.297059281957531,  
0.373254163970828,0.708959287150926,0.933660998085701  
"11727","ZDHC5",105.276105851271,0.0766351535188594,0.206925526522835  
,-0.370351376201052,0.711120698196037,0.933660998085701  
"11728","DPF2",157.949797092428,0.0739393466128586,0.198683337826506,0  
.3721466904156,0.709783634864071,0.933660998085701  
"11729","AP000766.1",17.6789871828027,0.145237117396316,0.389561126216  
282,0.372822408660152,0.709280623655996,0.933660998085701  
"11730","CRTAM",3.12876948723145,0.4383679587635,1.17477052205879,0.37  
315199056515,0.70903532565192,0.933660998085701  
"11731","GRASP",136.585944352408,0.0974800239730401,0.262722082638508,  
0.37103856285719,0.710608809504062,0.933660998085701  
"11732","GPN3",127.744084336899,-0.0949655828102021,0.255581205145046,  
-0.371567161037166,0.710215142931401,0.933660998085701  
"11733","ANKRD9",107.919944123154,-0.115774049099377,0.312205312053529  
,-0.370826647176096,0.710766652621458,0.933660998085701  
"11734","DNAJA4",44.3013649482215,0.134922180988617,0.362937539708747,  
0.371750414952641,0.710078685019931,0.933660998085701  
"11735","AC145285.2",2.65453281445256,0.378889384354295,1.016209179559  
39,0.372845858879739,0.709263169359069,0.933660998085701  
"11736","ZNF720",133.526466353069,0.0618530305534628,0.167187344815826  
,-0.369962395309287,0.711410509722476,0.933660998085701  
"11737","IL34",60.4732573213407,0.142494868170144,0.383237949477282,0.  
371818261642668,0.710028166123579,0.933660998085701  
"11738","AC009063.3",5.23743423266865,0.328830902843238,0.885486155129  
959,0.371356345819972,0.710372135540826,0.933660998085701  
"11739","NT5C3B",206.722950656098,0.0900933813217104,0.24311744974344,  
0.370575544522967,0.710953699790515,0.933660998085701  
"11740","LINC00526",23.3900945192376,-0.166938135647496,0.449255254132

77,-0.371588610509963,0.710199170349013,0.933660998085701  
"11741","RAB3A",10.4399433925171,0.204703888099701,0.551312021794573,0  
.37130314596328,0.710411755042349,0.933660998085701  
"11742","TBC1D17",142.191292068181,0.0654166464302378,0.17662364533149  
4,0.370373096464299,0.711104516670876,0.933660998085701  
"11743","ZNF548",38.5526160681828,0.0988100251027928,0.266866925314319  
,0.370259540354853,0.711189117040035,0.933660998085701  
"11744","PANK2",126.518127630001,0.0762785004732672,0.2052367227831,0.  
371661072340746,0.710145211802907,0.933660998085701  
"11745","MRGBP",70.2379441180062,0.0894190432629389,0.241289761717003,  
0.37058780541138,0.710944566211254,0.933660998085701  
"11746","SNAP29",196.757994427903,0.0727328955277026,0.19541259916208,  
0.372201668876919,0.709742703634397,0.933660998085701  
"11747","CAMKK2",256.670489792939,-0.0943689397621757,0.25533693035974  
7,-0.36958594132552,0.71169102775029,0.93391650572663  
"11748","AHCYL2",29.6297204095578,0.134492032915409,0.363979426142429,  
0.36950449189065,0.711751725656913,0.933916653983769  
"11749","NEIL1",23.9382574708644,-0.129338792726305,0.350226701413621,  
-0.369300205279193,0.711903972559819,0.93395742442635  
"11750","EPOR",28.2744656887154,-0.121118108349096,0.32789663450058,-0  
.369378931057255,0.711845299924532,0.93395742442635  
"11751","ZNF212",25.5953080712038,-0.136161984289858,0.368998641444739  
, -0.369004026022272,0.712124723891211,0.934167527766404  
"11752","SSBP3",250.40282591326,-0.0720465919520799,0.195680653498677,  
-0.3681845428453,0.712735635095115,0.934173949068208  
"11753","ATP8A1",18.4623379464771,0.21848251280354,0.592268167238978,0  
.368891196401888,0.712208825556967,0.934173949068208  
"11754","AC096733.2",12.1535107397725,-0.171412637172551,0.46555605979  
3235,-0.368189036673004,0.712732284517594,0.934173949068208  
"11755","TAF11",208.608661593333,-0.0731883273436505,0.198727880606174  
, -0.368284143726619,0.712661374430812,0.934173949068208  
"11756","TGS1",200.151359070413,0.0743829631417809,0.201947198107321,0  
.368328770287032,0.712628102536336,0.934173949068208  
"11757","TNFSF15",5.28671909661333,-0.43263733439765,1.17437196699669,  
-0.368398894520674,0.712575821635166,0.934173949068208  
"11758","TMEM233",36.0453677596405,-0.208175783766787,0.56467266669515  
8,-0.368666301815476,0.712376469366993,0.934173949068208  
"11759","VWA8",33.5554682666664,-0.106188716054187,0.287947485435213,-  
0.368778063450319,0.712293156836335,0.934173949068208  
"11760","MOCOS",5.16247643908362,-0.298428239262024,0.809729395448888,  
-0.368553051104913,0.712460895428429,0.934173949068208  
"11761","ACTR5",22.4393168933719,-0.129165131321132,0.350666975634731,  
-0.368341304701802,0.712618757443826,0.934173949068208  
"11762","LSG1",101.173231537416,-0.0906834877711667,0.246769887841025,  
-0.367481983172871,0.713259528540658,0.934385955390823  
"11763","HYMAI",460.51117687416,0.094786419389505,0.257713727527719,0.  
367797324181383,0.713024364384701,0.934385955390823  
"11764","AKNA",70.0182163615469,-0.0969727978467176,0.263845966554619,  
-0.367535646320533,0.713219507561906,0.934385955390823  
"11765","POLA2",14.6629882006658,0.161324588785446,0.439002479037461,0

.367479903847378,0.713261079278872,0.934385955390823  
"11766","MPV17L2",14.1409781335514,-0.164014368206948,0.44596288435947  
1,-0.367775826103822,0.713040395614468,0.934385955390823  
"11767","TOP3B",40.4721852881849,0.11127031947897,0.302594804542819,0.  
36772052199338,0.713081636763595,0.934385955390823  
"11768","SLC4A5",7.27543905715192,0.209619380207117,0.571145150946285,  
0.367015950078216,0.713607120544063,0.934443050068068  
"11769","RARS",165.365972300303,-0.0689140126393285,0.18797698021822,-  
0.366608786668065,0.713910853107469,0.934443050068068  
"11770","LINC00513",40.0389128668963,-0.185274204720506,0.505218041468  
225,-0.366721275792283,0.713826934819118,0.934443050068068  
"11771","AC087672.2",10.9246558299642,0.205747184352336,0.560526401150  
684,0.367060648579558,0.713573779470917,0.934443050068068  
"11772","PHPT1",1072.11261230483,-0.101123230813055,0.275652993849325,  
-0.366849746128024,0.71373109858227,0.934443050068068  
"11773","GOLGA3",253.483996885175,0.0899321962209404,0.245034925958726  
,0.367017868449042,0.713605689600244,0.934443050068068  
"11774","LRRC57",74.7436752340479,0.0860171225106526,0.234611917375411  
,0.366635776532244,0.71389071801688,0.934443050068068  
"11775","WTIP",188.694029583725,0.0851534615860389,0.232022469006763,0.  
.367005238546776,0.713615110467081,0.934443050068068  
"11776","ZNF497",3.58150632784423,0.274979725847705,0.749635855793927,  
0.366817733866904,0.713754978650372,0.934443050068068  
"11777","SMTN",87.5014287056506,0.110017146045544,0.299698389686138,0.  
367092883484494,0.713549735462364,0.934443050068068  
"11778","PPP4R3B",259.273458242002,0.073027958336868,0.199322847653865  
,0.366380267974523,0.71408134155585,0.934458753255731  
"11779","FAM151B",6.7141809795027,0.222881008566038,0.608384467538923,  
0.366348946197872,0.714104710564548,0.934458753255731  
"11780","ZNF563",26.2938541114076,0.1327649876986,0.362269651842293,0.  
366481119860398,0.7140060983295,0.934458753255731  
"11781","KCTD5",41.3965414799818,-0.104477085454276,0.285301333080019,  
-0.366199079150372,0.714216529271449,0.934525744734691  
"11782","HADHB",487.85295037232,-0.0881140659150575,0.240731835497877,  
-0.366025813465101,0.714345813803992,0.934615576284886  
"11783","ZNF165",3.61282495691016,-0.282557106056857,0.772755524982831  
, -0.365648768493936,0.714627179335462,0.934904351137753  
"11784","SLC24A1",10.4472572360961,0.179169426627872,0.490115470483505  
,0.36556574402991,0.71468914061249,0.934906067764896  
"11785","STAG3",5.67973728091436,0.236271591105897,0.646616878376123,0.  
.365396572541157,0.714815399357679,0.934991886389361  
"11786","SLC4A1AP",111.892128340448,-0.0751989370954205,0.206257569377  
458,-0.364587526762734,0.71541932708103,0.935147030183505  
"11787","ZNF789",15.5786720657457,0.160684196599313,0.44064204336604,0.  
.364659248971922,0.715365781461562,0.935147030183505  
"11788","GZMB",16.7264955245047,0.213949255353557,0.586480801330225,0.  
364801805733944,0.715259357078134,0.935147030183505  
"11789","AL136040.1",4.38221126939836,0.254956510746928,0.699059245041  
735,0.364713738578346,0.715325102115188,0.935147030183505  
"11790","AC016876.1",84.996734322371,-0.115982337090401,0.317729753831

901,-0.36503454804476,0.715085617432906,0.935147030183505  
"11791","ARRDC2",50.7802402556846,0.101664473770274,0.278833709930256,  
0.364606108048065,0.715405454724282,0.935147030183505  
"11792","MAP4K1",2.39744338695323,-0.363702824171985,0.997529778891898  
, -0.364603475372939,0.715407420212767,0.935147030183505  
"11793","CLEC11A",346.81445874612,0.0961961160720584,0.263479345578587  
, 0.365099267499761,0.715037307674605,0.935147030183505  
"11794","AC112206.2",5.91950860643433,-0.273040842477696,0.74956318976  
447,-0.364266610482156,0.71565893055865,0.935380906779853  
"11795","SNIP1",97.20930791686,0.0943571146459488,0.259112288754479,0.  
364155305406439,0.715742040032197,0.935410220186207  
"11796","NPHP1",64.0757232273748,-0.101547117195194,0.279066846540035,  
-0.363880978533315,0.715946889294692,0.935598618046598  
"11797","GRIP2",6.8180777344451,-0.230310022178226,0.63328640890555,-0.  
.363674348508836,0.7161012005073,0.935634779705085  
"11798","PCDHGA9",6.99436611320681,0.230090034674883,0.632894869330595  
, 0.363551745834574,0.716192765613181,0.935634779705085  
"11799","PTK7",88.3045511933314,-0.103486889754516,0.284744614141056,-  
0.363437566911276,0.716278043159242,0.935634779705085  
"11800","KMT2E",607.150991116084,0.0747985232824759,0.205700698152622,  
0.363627950484535,0.716135852126221,0.935634779705085  
"11801","C16orf95",25.6755490521003,0.15017910415009,0.413191053943178  
, 0.363461654643526,0.716260052305322,0.935634779705085  
"11802","TENT5C",18.2688973565888,-0.17236910248062,0.474866564287554,  
-0.362984289574539,0.71661662021701,0.935926654266376  
"11803","ZNF225",17.5627024335544,0.150084106197327,0.413574943929549,  
0.362894581502727,0.716683634574135,0.935926654266376  
"11804","PJA1",87.0265387894417,0.10763401108455,0.296551819456181,0.3  
62951781182561,0.71664090461341,0.935926654266376  
"11805","PIIP5K1",6.69765558083937,-0.235485596147719,0.64944061275826  
3,-0.362597582475755,0.716905516449381,0.936137105977739  
"11806","FCH02",196.676848415374,0.0675492475756237,0.186391844587988,  
0.362404523250139,0.717049759849267,0.936147644289144  
"11807","E2F3",46.4054550303376,0.105892230989016,0.29271541042728,0.3  
617583059069,0.717532651860142,0.936147644289144  
"11808","LINC00271",18.1201650156055,-0.14508087286768,0.4012064283523  
57,-0.36161153614484,0.7176423426899,0.936147644289144  
"11809","AC007285.1",4.92083698282612,0.28570078955999,0.7896229325446  
94,0.361819265607283,0.717487094322945,0.936147644289144  
"11810","TRAF1",10.9131878404474,-0.208088617887635,0.575241733668124,  
-0.361741170204609,0.717545458212824,0.936147644289144  
"11811","TRAPPC4",219.170766381938,-0.101369943586996,0.27992531344565  
, -0.362132107093907,0.717253311617481,0.936147644289144  
"11812","FAM71D",3.58509056882862,0.328420049185987,0.906734891540692,  
0.362200740536131,0.717202026207811,0.936147644289144  
"11813","ABHD17C",9.82456388396168,-0.169388409915882,0.46798089703513  
9,-0.361955821250463,0.717385044666416,0.936147644289144  
"11814","ZNF174",31.3142240357696,0.107153827985229,0.296313438842226,  
0.361623247342095,0.717633589917527,0.936147644289144  
"11815","SH2D3A",6.75780260118069,-0.219027404209948,0.604425816867362



, -0.362372681804246, 0.717073551023203, 0.936147644289144  
"11816", "DONSON", 25.2270504484905, -0.134048336170758, 0.370334973503034  
, -0.361965101223851, 0.717378109814927, 0.936147644289144  
"11817", "FUND C1", 108.214532616368, 0.101831372935189, 0.281229559333532,  
0.362093419968061, 0.717282220609804, 0.936147644289144  
"11818", "AC027097.2", 23.2070788544929, 0.145181570076687, 0.401672075062  
884, 0.361443025517663, 0.717768289097006, 0.936153496609725  
"11819", "AC027307.3", 7.58994578384612, -0.209916087992746, 0.58067759242  
7642, -0.361501960347993, 0.717724239785237, 0.936153496609725  
"11820", "AC084036.1", 9.83114094977197, -0.238431040950385, 0.66063036752  
7492, -0.360914442735578, 0.71816340653307, 0.936272742871049  
"11821", "GLE1", 63.4290091131234, 0.0836064241645161, 0.231641982494109, 0  
.360929496735949, 0.718152152572983, 0.936272742871049  
"11822", "MPH0SPH8", 822.846102477517, 0.0590554646886086, 0.1635594214537  
59, 0.361064279658782, 0.71805139526084, 0.936272742871049  
"11823", "AL356019.2", 5.41275769017302, 0.222385313547855, 0.615726258610  
575, 0.361175620558528, 0.717968165790036, 0.936272742871049  
"11824", "ZNF426-  
DT", 3.49930802264442, 0.281029043683513, 0.778142580067875, 0.36115366371  
4174, 0.71798457868993, 0.936272742871049  
"11825", "MALAT1", 195116.05869378, -0.0539092260308352, 0.149412907524144  
, -0.360807020786501, 0.718243714027087, 0.936282284061087  
"11826", "TAPBPL", 112.558326423205, 0.126290257616949, 0.350084548608122,  
0.360742163911713, 0.718292201836291, 0.936282284061087  
"11827", "KRR1", 355.159380200657, -0.0608851006100801, 0.168938264705672,  
-0.360398520229596, 0.718549133068475, 0.936458816896393  
"11828", "ZNF341", 8.93158350136218, -0.195321652402332, 0.541878269736977  
, -0.360453008195253, 0.718508392060784, 0.936458816896393  
"11829", "TERC", 2.82248373339458, -0.326245992207398, 0.905973733140386, -  
0.360105354353407, 0.718768348838107, 0.936478611871269  
"11830", "COL4A1", 760.966903474822, 0.126764150708676, 0.352013933040139,  
0.360111174048959, 0.718763996915979, 0.936478611871269  
"11831", "NPIP B4", 13.8331354908289, 0.221281176331704, 0.614579059460374,  
0.36005323143616, 0.718807326348418, 0.936478611871269  
"11832", "ICAM4", 22.3234195391166, 0.183342500164619, 0.50911192963312, 0.  
360122184323476, 0.718755763545061, 0.936478611871269  
"11833", "SNRPD3", 577.148016730467, -0.0774304151513561, 0.21512547027141  
5, -0.359931416087854, 0.718898422701363, 0.936518142985  
"11834", "AC016394.2", 3.40630516505836, 0.284878916056653, 0.792274094195  
805, 0.359571161222706, 0.719167853043853, 0.936729035835913  
"11835", "C12orf73", 43.6463665611182, 0.116402933965898, 0.32374395631917  
5, 0.359552454011336, 0.719181844898996, 0.936729035835913  
"11836", "WDR53", 18.4873380743597, 0.147057143820036, 0.409142901642301, 0  
.359427337562861, 0.719275426804324, 0.93675417636879  
"11837", "PAN3", 93.8085038311374, 0.0842705765820247, 0.234499114387527, 0  
.359364157097675, 0.719322684766615, 0.93675417636879  
"11838", "SH3BP5-  
AS1", 14.0433033904484, 0.152201597250583, 0.423644406344207, 0.3592673359  
33903, 0.719395107507345, 0.936769351429779  
"11839", "SFT2D1", 410.382595069111, 0.082982524603527, 0.23103432758326, 0

.359178332811265,0.719461684534447,0.93677691250093  
"11840","TARS2",54.3898916446372,0.0926113978613233,0.257962815865688,  
0.359010648687998,0.719587123111215,0.936781986551759  
"11841","ALG1L",6.35227046193575,0.237397391916972,0.661211007183155,0  
.359034240715859,0.719569474290928,0.936781986551759  
"11842","UBE2D4",147.42708488543,-0.107824772426174,0.300848106487417,  
-0.358402695915535,0.720041974431815,0.936828757482013  
"11843","CPEB3",21.9486673161585,0.154433969090225,0.430641813493798,0  
.358613502570273,0.719884244228064,0.936828757482013  
"11844","GTF2H1",123.473929152789,0.0696196397736089,0.194271269793156  
,0.358363024279062,0.720071658960664,0.936828757482013  
"11845","AC012085.2",2.90006828183148,0.331307088926064,0.924151716552  
62,0.358498591726848,0.719970221585893,0.936828757482013  
"11846","C12orf43",93.4971401623068,-0.0858053236876625,0.239308073405  
425,-0.358555908568513,0.719927336151052,0.936828757482013  
"11847","VAMP2",736.826476057672,0.0934407173763288,0.260779736606018,  
0.358312799117125,0.720109240830644,0.936828757482013  
"11848","AC060780.1",59.6795160359146,0.0975619489244321,0.27187088353  
2568,0.35885398118679,0.719704327365517,0.936828757482013  
"11849","TUBGCP6",47.4779082272377,0.113230731166929,0.315871447227601  
,0.358470929109782,0.719990919541302,0.936828757482013  
"11850","RAB10",366.820052132005,-0.0494637455816673,0.138106433587968  
, -0.358156707813044,0.720226043239714,0.936901641902126  
"11851","NME7",102.472124568506,-0.0860932280093898,0.240787025563948,  
-0.357549281601659,0.720680639623258,0.937136203456226  
"11852","AC099661.1",2.54394330968901,0.345170424973254,0.965139290570  
868,0.357637937182197,0.720614283832486,0.937136203456226  
"11853","AL137186.2",26.0005540218161,0.125207252116494,0.350248961589  
96,0.357480723277847,0.720731954719581,0.937136203456226  
"11854","COLCA2",32.3719758180477,0.159373436177144,0.445832050078488,  
0.357474156802066,0.720736869715214,0.937136203456226  
"11855","MT1E",3079.84127297098,-0.2185800151135,0.611724241859438,-0.  
357317889592032,0.720853838852315,0.937136203456226  
"11856","WWOX",67.8644061552614,0.095972852969087,0.268611070128631,0.  
357292992143355,0.720872475694678,0.937136203456226  
"11857","LINC01415",5.14038890633975,0.229443591902274,0.6422206862788  
82,0.357265962938227,0.720892708438789,0.937136203456226  
"11858","SF3A1",165.486707950803,0.0612103806152708,0.171308414194988,  
0.357310999012572,0.720858996739443,0.937136203456226  
"11859","THUMP3",130.432315595775,0.0632595571932216,0.17726728486327  
8,0.356859740036139,0.721196810608727,0.937203117400196  
"11860","SNRK",108.615134690989,0.0788248320610621,0.221027713548309,0  
.356628726758438,0.721369768923342,0.937203117400196  
"11861","SPATA5",33.5746431200317,-0.109477269306787,0.306667398863632  
, -0.356990243216132,0.721099109929017,0.937203117400196  
"11862","AL359091.5",9.46765772939268,0.227762086294909,0.638194442169  
007,0.356885098404842,0.721177825811984,0.937203117400196  
"11863","CORO1C",153.348814001721,0.0927361117723523,0.260030219693697  
,0.356635901325587,0.721364397151662,0.937203117400196  
"11864","AC012615.1",11.9942939833707,-0.176558939742188,0.49498979373

7022,-0.356692081283578,0.72132233433567,0.937203117400196  
"11865","INE2",4.05731551765951,0.308383516634131,0.86391819930168,0.3  
56959162202397,0.721122378191808,0.937203117400196  
"11866","WDCP",17.3542683069889,0.134162033879492,0.376327353537304,0.  
356503540384271,0.721463501196737,0.93724590181592  
"11867","RIN3",41.1515977416509,-0.118275582969018,0.331977302066851,-  
0.3562761135555,0.721633795876359,0.937388132083431  
"11868","GNA11",355.70829450148,0.113903425754742,0.319783547279346,0.  
356189137070402,0.721698926549074,0.937393743912536  
"11869","FTL",35485.6620873256,0.102046128469624,0.286589978284577,0.3  
56070121783165,0.721788052133796,0.937430518463431  
"11870","COMMD5",170.361177323153,-0.0947637487216494,0.26626991964149  
3,-0.355893556618185,0.721920281379511,0.937523263476425  
"11871","TMEM230",915.048662338982,-0.098201617052402,0.27604267409148  
8,-0.35574795591154,0.722029327665084,0.93758588880105  
"11872","MFSD14B",146.558467118306,0.0676011416347985,0.19012095893880  
1,0.355569117745503,0.722163274564088,0.937609830045195  
"11873","ERP29",910.900200894006,-0.0865602403885794,0.243447002125354  
,-0.355560921403372,0.722169413696179,0.937609830045195  
"11874","OSBPL10-  
AS1",4.94375870864519,0.241687001971149,0.681618697268939,0.3545780110  
48586,0.722905751782523,0.937635481755405  
"11875","PCGF3",104.93637339574,0.0914412159432148,0.257444526336767,0.  
.355188036989371,0.722448726306494,0.937635481755405  
"11876","SGCB",359.601087487528,0.0667720232667888,0.188078603086734,0.  
.355021901327055,0.722573183717145,0.937635481755405  
"11877","UNC5C",3.44772110759208,0.354544949997525,0.998245453142154,0.  
.355168109087332,0.722463654532411,0.937635481755405  
"11878","SGK1",288.43891565274,-0.283081902498187,0.798258163215846,-0.  
.354624500622417,0.722870918765894,0.937635481755405  
"11879","GPNMB",3925.19926191132,-0.0692467586567591,0.194908497496165  
,-0.355278294924631,0.722381114348242,0.937635481755405  
"11880","CBL",42.8095836909252,-0.140087615575398,0.394731430225448,-0.  
.354893491748018,0.722669384371065,0.937635481755405  
"11881","MGST1",3193.71773923014,-0.0937082750596725,0.264294387535588  
,-0.354560215725559,0.722919085349529,0.937635481755405  
"11882","AC004241.1",9.5029489922191,0.195787734669818,0.5516287925663  
29,0.354926605188536,0.722644576342481,0.937635481755405  
"11883","NOP9",26.1128078060581,-0.127982158857269,0.360801744565699,-  
0.354716020043978,0.722802348132562,0.937635481755405  
"11884","CINP",185.302463554,-0.0804904139848423,0.22668577532991,-0.3  
55074833732727,0.722533529602751,0.937635481755405  
"11885","DUSP18",60.5865889126706,-0.0982740529293377,0.27703737906116  
,-0.354732106051445,0.722790295973013,0.937635481755405  
"11886","GORAB-  
AS1",4.18691134987526,0.249048198313017,0.702999159577762,0.3542652859  
82137,0.723140080689521,0.937664703551174  
"11887","ERLEC1",537.005484387508,0.0504467791551111,0.142382304443898  
,-0.354305117845515,0.723110232719709,0.937664703551174  
"11888","FGF9",5.23888408021379,0.378129509921783,1.06696886978201,0.3

54396009697112,0.723042124572511,0.937664703551174  
"11889","TRAPPC6A",151.121389256014,0.103768265679945,0.29296067827012  
2,0.354205439080348,0.723184927701583,0.937664703551174  
"11890","THORLNC",9.54320408640155,0.19344095653822,0.54656382051723,0  
.35392199277874,0.723397344586036,0.937703503766713  
"11891","MB21D2",36.1985965719706,0.151964855906381,0.429370553675318,  
0.353924726802049,0.723395295585689,0.937703503766713  
"11892","SEC31A",929.029392997744,0.0670450912918441,0.189368914957737  
,0.354044861622653,0.723305263091949,0.937703503766713  
"11893","SLC9A1",58.8913498257315,0.0927563626622585,0.262343014770148  
,0.353569020099609,0.723661894874266,0.937809845270013  
"11894","CAHM",12.6001743389416,0.182177237288534,0.515030435164842,0.  
353721304315202,0.723547754983232,0.937809845270013  
"11895","BRD4",481.913333814622,0.0779654264578143,0.220488331361771,0  
.35360341282592,0.723636116340046,0.937809845270013  
"11896","GJA9",3.77620298578703,0.369591452290549,1.04636266544797,0.3  
53215442881192,0.723926931362854,0.937916763065927  
"11897","H3F3A",5663.65176724677,-0.0775447522451869,0.219479427480685  
, -0.353312167501489,0.723854424663391,0.937916763065927  
"11898","MTPAP",68.1625445490658,-0.0953479104737339,0.269911924532284  
, -0.35325564307304,0.7238967961985,0.937916763065927  
"11899","ELK4",168.308192595682,0.0872165633148941,0.247342129062746,0  
.352615074695863,0.724377034681542,0.938189942840395  
"11900","FBX036",27.1254486560044,-0.120595335827633,0.34317104808246,  
-0.351414656048301,0.725277288739342,0.938189942840395  
"11901","NME5",12.3044043431389,-0.241187077880108,0.6858234439752,-0.  
351675172376914,0.725081882186892,0.938189942840395  
"11902","GPER1",19.2501705051039,-0.145687999206351,0.413205029017824,  
-0.352580411600138,0.724403024936547,0.938189942840395  
"11903","PNPLA8",273.833768960874,-0.0588978618454978,0.16751435295533  
, -0.351598897684927,0.725139092005483,0.938189942840395  
"11904","ZNF746",31.7635538915433,-0.100018275921958,0.28465879961731,  
-0.351361967578099,0.725316811171928,0.938189942840395  
"11905","AL391834.2",11.4056040955941,0.173670346737101,0.494148447831  
88,0.351453793893506,0.725247931312832,0.938189942840395  
"11906","CD59",2417.41638387996,0.0799658342667041,0.226936425644695,0  
.352371083837829,0.724559984832616,0.938189942840395  
"11907","DPAGT1",65.2900662818762,-0.0916617111104796,0.26088707607870  
4,-0.35134630848033,0.725328557443268,0.938189942840395  
"11908","ATXN7L3B",328.055489829346,-0.0597701072207332,0.170054385043  
78,-0.351476424470593,0.725230956226723,0.938189942840395  
"11909","ZC3H13",474.177251553204,-0.0754126934473313,0.21404601089863  
1,-0.352320013490211,0.724598280585595,0.938189942840395  
"11910","LINC01588",7.48053261507868,0.19271407005194,0.54783785972880  
8,0.351772092106482,0.725009189775546,0.938189942840395  
"11911","IGHG3",75.7038756258072,0.474991978607826,1.3478279195003,0.3  
52412924332303,0.724528610716579,0.938189942840395  
"11912","GLIS2-  
AS1",3.54454735842629,0.283516916338247,0.805871265515443,0.3518141525  
45701,0.72497764408275,0.938189942840395

"11913", "RARA-  
AS1", 70.3394497550721, -0.106044451502161, 0.301047989838341, -0.35225098  
6824745, 0.724650042208097, 0.938189942840395  
"11914", "NT5C", 438.572987646849, -0.0917518647071531, 0.261230230478989,  
-0.351229888435645, 0.725415888985707, 0.938189942840395  
"11915", "CAPNS1", 818.654574626171, -0.071439343127682, 0.203387848864826  
, -0.351246859271134, 0.725403158230179, 0.938189942840395  
"11916", "ZNF765", 49.7736065009607, 0.0993407620448618, 0.281746096595774  
, 0.352589665820243, 0.72439608612705, 0.938189942840395  
"11917", "NECAB3", 79.2160303949336, -0.128727840546595, 0.36607669418567,  
-0.351641725876452, 0.725106968539464, 0.938189942840395  
"11918", "TAF4", 33.7356620758793, 0.115996789105946, 0.32878094558541, 0.3  
52808733789021, 0.724231835689019, 0.938189942840395  
"11919", "PLS3", 705.83507574604, 0.0677886541860658, 0.192855516725686, 0.  
351499689181757, 0.725213505620467, 0.938189942840395  
"11920", "LRRC37B", 19.5490202992869, 0.133670438441014, 0.38071970241946,  
0.351099345769456, 0.725513818744031, 0.938237878853963  
"11921", "LONP1", 87.5167393727208, -0.0695808033386234, 0.198232529774563  
, -0.351005979784212, 0.725583862263547, 0.938249747235347  
"11922", "ABCA3", 17.8470705189015, -0.136518723995749, 0.389114361809326,  
-0.350844732024171, 0.725704836355679, 0.93832746623241  
"11923", "CYBA", 1364.58899794486, 0.0976475816048797, 0.278462789287583, 0.  
.350666535570877, 0.725838533951327, 0.938421622147086  
"11924", "CTSS", 222.807091790552, -0.0918834648699778, 0.262285699031617,  
-0.350318241555754, 0.726099876809946, 0.938440790200412  
"11925", "ZNF687-  
AS1", 4.05654270148537, -0.263539331664972, 0.753968608798374, -0.34953621  
2236984, 0.726686789649841, 0.938440790200412  
"11926", "LINC01133", 654.453918194596, -0.0997627501876016, 0.28563400034  
9327, -0.349267769472797, 0.72688829289607, 0.938440790200412  
"11927", "TRABD2A", 19.367877755432, -0.200722859699502, 0.573180672788416  
, -0.350191255966505, 0.726195168543138, 0.938440790200412  
"11928", "BARD1", 28.983634512842, 0.137181504840669, 0.392522191248686, 0.  
34948725931716, 0.726723534145515, 0.938440790200412  
"11929", "TEX264", 323.1319720186, -0.100112026684199, 0.286152357203993, -  
0.349855677102917, 0.726447011931942, 0.938440790200412  
"11930", "C2", 467.916358294634, 0.109081043495955, 0.311806728680671, 0.34  
9835437989114, 0.726462201816995, 0.938440790200412  
"11931", "HLA-  
DQA2", 8.90992939049569, -0.707646399264514, 2.02279894421405, -0.34983526  
2317416, 0.726462333662809, 0.938440790200412  
"11932", "AL139393.3", 53.3335988808518, -0.077447807511671, 0.22170259559  
4847, -0.34933198370489, 0.726840089555979, 0.938440790200412  
"11933", "FAM120B", 63.3183228553448, 0.0864330853192646, 0.24670608462958  
8, 0.350348413372284, 0.726077236086926, 0.938440790200412  
"11934", "DUS4L", 19.5769337102028, 0.127228134053677, 0.363614637250419, 0.  
.349898274216217, 0.726415042244504, 0.938440790200412  
"11935", "GLI4", 81.9876105538212, -0.102302292763917, 0.292267246497055, -  
0.35002996055854, 0.726316212945894, 0.938440790200412  
"11936", "SH3PXD2A", 312.105620412331, 0.0937889589932151, 0.2684157839694

8,0.349416705702669,0.726776493420048,0.938440790200412  
"11937","EIF3J-  
DT",142.98046884182,0.0775470166731325,0.221752782027434,0.34970031024  
7015,0.726563620815198,0.938440790200412  
"11938","TERF2",100.815264733195,0.0757969584396264,0.216226486630244,  
0.350544281696822,0.725930263667742,0.938440790200412  
"11939","TMEM92",3.45639452138045,-0.365271790942784,1.04374909385291,  
-0.349961301134562,0.726367740596827,0.938440790200412  
"11940","MR0",2.55824566374551,0.391176766301585,1.11954659921132,0.34  
9406417363205,0.726784216209223,0.938440790200412  
"11941","TCP10L",5.50436602812286,-0.235241357502765,0.673784543798117  
, -0.349134392689853,0.726988417557772,0.938491454371749  
"11942","RHOH",7.89116324851872,0.245072258817454,0.703602100178016,0.  
348310868821241,0.72760673217636,0.938590647803382  
"11943","FAM91A1",102.235548856262,0.0745633248436522,0.21407653193285  
9,0.348302189737629,0.727613249513487,0.938590647803382  
"11944","AL359644.1",8.24948736445874,0.227287188616484,0.652126993927  
691,0.348532096865915,0.72744061325484,0.938590647803382  
"11945","TMEM80",121.305169156098,0.0959384930936445,0.275174804389464  
,0.348645630207698,0.727355366665896,0.938590647803382  
"11946","AP000487.1",8.22168454063883,0.202406057781156,0.580886663907  
335,0.348443285682738,0.727507299545225,0.938590647803382  
"11947","PHF11",212.299778840172,0.0660287472803849,0.189297611757279,  
0.348809193456959,0.727232561018447,0.938590647803382  
"11948","THUMPD1",300.403468284593,0.0538450190460544,0.15446031081891  
,0.34860100151671,0.72738887574724,0.938590647803382  
"11949","TRAPPC2L",511.662820679767,0.108715495137276,0.31156398351204  
3,0.348934732159353,0.727138309501586,0.938590647803382  
"11950","GLOD4",236.375994510254,-0.0640017860880602,0.183613890246018  
, -0.348567235312679,0.727414229167059,0.938590647803382  
"11951","LTB",15.5915617686761,0.193234072556631,0.555098951925619,0.3  
48107435415449,0.727759500499521,0.938674295134506  
"11952","AL136038.5",24.6311119665429,-0.116574047194746,0.33500928945  
503,-0.347972581251047,0.727860775202254,0.938674295134506  
"11953","ZNF830",118.111034814834,-0.0877810953113216,0.25226305753094  
, -0.347974436568284,0.727859381837421,0.938674295134506  
"11954","MED15",126.464192501512,0.0726187609753537,0.208772029104604,  
0.3478375972433,0.72796215217594,0.93872649956434  
"11955","SPDYE16",3.4243977003886,0.280271873033901,0.806439534086632,  
0.347542327958085,0.728183924715562,0.93879517929104  
"11956","MRPL51",839.703041346914,-0.0911948873812275,0.26241363404223  
7,-0.347523434573331,0.72819811604171,0.93879517929104  
"11957","ITGB2-  
AS1",4.95503131913466,-0.248270259282743,0.714103219643682,-0.34766718  
9354816,0.728090140327029,0.93879517929104  
"11958","PLEKHA1",183.175077729389,-0.0787429323313615,0.2267215617237  
26,-0.347311176461084,0.728357555184312,0.938922203810517  
"11959","LINC01772",3.37229455723885,0.285198255750381,0.8271858943870  
04,0.344781333537766,0.73025876726976,0.939624420243833  
"11960","TMEM200B",59.5987294196438,-0.0871595160307483,0.254490849645

534,-0.342485854214986,0.731985287762416,0.939624420243833  
"11961","LINC01135",4.13411722003901,0.260592179877726,0.7601926862159  
72,0.342797536207408,0.731750779600922,0.939624420243833  
"11962","TMEM9",326.788788512902,0.0571400896429156,0.166599563954228,  
0.342978626634428,0.731614539465375,0.939624420243833  
"11963","PFKFB2",11.7552117598641,0.146846722124216,0.42887375728845,0  
.342400810561721,0.732049278581523,0.939624420243833  
"11964","EIF2AK3",66.0847282975757,0.0799443984112827,0.23174160726997  
7,0.344972140967971,0.730115314856585,0.939624420243833  
"11965","LIPT1",57.4593569800039,0.0968629787999185,0.282168956447522,  
0.343280068861625,0.731387773578654,0.939624420243833  
"11966","TMEM185B",98.6678094774493,-0.0855600750947414,0.249528171897  
634,-0.342887436092151,0.731683143977271,0.939624420243833  
"11967","LINC01963",6.5954058641512,0.201998603323318,0.58617910967167  
1,0.344602187267406,0.730393461206095,0.939624420243833  
"11968","UBE2F",150.610089587799,0.0734780141712982,0.212136736291654,  
0.346371003230094,0.72906391403166,0.939624420243833  
"11969","SLC41A3",141.344422582366,0.0682383592111156,0.19745897102365  
2,0.345582471423605,0.729656521013467,0.939624420243833  
"11970","MRAS",64.9259445270073,-0.0797111849370899,0.231273735094422,  
-0.344661640477879,0.730348759454171,0.939624420243833  
"11971","DGKQ",22.6031311124165,-0.111823432810217,0.323691443933514,-  
0.345463047930254,0.729746285695441,0.939624420243833  
"11972","SLC35A4",102.543178592074,0.0651044492120268,0.19005006862999  
7,0.342564723503346,0.731925944489728,0.939624420243833  
"11973","RWDD2A",35.2790163551896,-0.0984271649636656,0.28659956328415  
, -0.34343096631337,0.731274266793142,0.939624420243833  
"11974","FAM221A",18.3809295689209,-0.163764667255387,0.47409923681076  
9,-0.345422760764222,0.729776568383702,0.939624420243833  
"11975","METTL2B",105.539805510186,0.0825721281996969,0.24041859501188  
9,0.343451504637624,0.731258818085952,0.939624420243833  
"11976","AC090114.2",57.4993524683367,-0.115214889733148,0.33417808212  
5604,-0.344770934707331,0.730266585566305,0.939624420243833  
"11977","CSPP1",101.123590132891,-0.0810527381242124,0.236165542139266  
, -0.343203065908811,0.731445698344602,0.939624420243833  
"11978","LY6E",1294.98090627805,-0.098506818515143,0.284580283861448,-  
0.346147727377708,0.729231696596582,0.939624420243833  
"11979","TSTA3",124.387888431745,-0.0876403862533187,0.255083482445555  
, -0.343575308809047,0.731165696224739,0.939624420243833  
"11980","HSF1",161.303797356014,-0.05437550048205,0.158579954838493,-0  
.342890124653076,0.731681121287152,0.939624420243833  
"11981","ZNF503-  
AS2",17.378266634767,-0.153406840470632,0.446593748329025,-0.343504227  
375818,0.73121916110677,0.939624420243833  
"11982","TSPAN32",4.71258406839664,-0.245598543324604,0.71538526236591  
4,-0.343309481260997,0.731365648774726,0.939624420243833  
"11983","TMEM223",156.531458138878,-0.0924172484564432,0.2677335153826  
32,-0.345183711215105,0.729956263628544,0.939624420243833  
"11984","CRADD",37.8907652169107,0.0954941727440645,0.277257064200447,  
0.344424669645299,0.730526938820106,0.939624420243833

"11985", "GPALPP1", 119.717830203218, 0.0734371775539265, 0.21219132920338  
8, 0.346089436498775, 0.729275501915278, 0.939624420243833  
"11986", "LAMP1", 1494.53700494286, 0.0601999292609762, 0.175832614523398,  
0.342370665556846, 0.732071961539308, 0.939624420243833  
"11987", "NFATC4", 136.731890294142, 0.0942368238828313, 0.274256409186234  
, 0.343608465386271, 0.731140757493665, 0.939624420243833  
"11988", "AP4S1", 44.0905382615774, -0.0852917484141206, 0.249071925624995  
, -0.342438226227618, 0.732021125056348, 0.939624420243833  
"11989", "TRIP11", 448.238342244318, 0.0623616265901476, 0.18158254250034,  
0.343434042344852, 0.73127195302832, 0.939624420243833  
"11990", "AC123768.4", 7.02350779241359, 0.194356373075944, 0.567291580041  
442, 0.342604015137587, 0.73189638105604, 0.939624420243833  
"11991", "NOP10", 634.444477238628, -0.0846238461480357, 0.24642657421453,  
-0.343403897967454, 0.731294627479024, 0.939624420243833  
"11992", "AC090517.2", 6.62140504465069, 0.220710962582078, 0.637824170658  
697, 0.346037313628526, 0.729314672753154, 0.939624420243833  
"11993", "AC009269.4", 2.71261073776533, -0.356628772806165, 1.03103166582  
626, -0.345895072505232, 0.729421571918708, 0.939624420243833  
"11994", "PDE8A", 115.933686198332, 0.0747400841451002, 0.216775770201694,  
0.344780618588323, 0.730259304799193, 0.939624420243833  
"11995", "ARPIN", 135.15357367675, 0.0680418087342384, 0.196540826333829, 0  
.346196818256314, 0.729194805720058, 0.939624420243833  
"11996", "SNX29", 250.418511612765, 0.0971568894175812, 0.28224692892109, 0  
.344226560015979, 0.73067590944562, 0.939624420243833  
"11997", "EIF3CL", 2.54960892333259, 0.377499608453846, 1.09864813862599, 0  
.343603739160712, 0.731144312308499, 0.939624420243833  
"11998", "RSPRY1", 149.00620752996, 0.0571282202287638, 0.16536531818123, 0  
.345466757220246, 0.729743497551475, 0.939624420243833  
"11999", "HYDIN", 7.77449056071065, 0.246720514825363, 0.72061794681838, 0  
.342373536372034, 0.73206980135111, 0.939624420243833  
"12000", "ATP2A3", 6.25219671367679, 0.234885283889856, 0.683118135234783,  
0.343842846170564, 0.730964476009697, 0.939624420243833  
"12001", "AC015802.6", 14.8923295682586, -0.190053375035307, 0.55185453734  
8274, -0.34439034595699, 0.730552748151763, 0.939624420243833  
"12002", "NAPG", 130.945943370844, 0.0680272582077309, 0.198361295487123, 0  
.342946228701895, 0.731638912847589, 0.939624420243833  
"12003", "KCTD1", 39.9821532644919, 0.124566619720715, 0.360053453334963, 0  
.345967018416093, 0.729367501399725, 0.939624420243833  
"12004", "ZNF781", 13.2362000986575, 0.193241140963115, 0.559783988948549,  
0.345206623944502, 0.729939039324358, 0.939624420243833  
"12005", "DYRK1B", 47.9062993397475, -0.0869469331547196, 0.25236919719056  
3, -0.344522763168543, 0.730453180122732, 0.939624420243833  
"12006", "IRF3", 187.650479899524, 0.0633425348262871, 0.183961342670462, 0  
.344325247395891, 0.730601699159076, 0.939624420243833  
"12007", "RDH13", 49.2322412308787, 0.0859903350614495, 0.250995402851064,  
0.342597251123657, 0.731901470342016, 0.939624420243833  
"12008", "SLC27A5", 41.3568574533284, -0.126137473755994, 0.36491782778125  
8, -0.345659938082292, 0.729598295171756, 0.939624420243833  
"12009", "GPKOW", 70.5344829394373, -0.0784671272088629, 0.227487170301522  
, -0.344929901342828, 0.73014707054299, 0.939624420243833



"12010", "OCRL", 64.0916142482483, 0.0880227037776184, 0.255790566263211, 0.344120211560274, 0.730755883479689, 0.939624420243833  
"12011", "PGAP1", 50.995994924697, 0.0979336747878758, 0.286413861499533, 0.341930639373176, 0.732403090973642, 0.939712829112978  
"12012", "CAAP1", 67.6288636183942, 0.0761067852641185, 0.222616415511909, 0.341874093557341, 0.732445646564543, 0.939712829112978  
"12013", "THSD1", 65.3613215852351, -0.150756570743184, 0.440880437592913, -0.341944341114961, 0.732392779358061, 0.939712829112978  
"12014", "DNAL1", 62.2752844714896, -0.0843086274892671, 0.246502672837908, -0.342019121004443, 0.732336502585382, 0.939712829112978  
"12015", "KCNJ14", 6.3734842518307, 0.212385702701047, 0.620691120480407, 0.342176157662226, 0.732218326883478, 0.939712829112978  
"12016", "LINC00960", 4.60253436985373, -0.287032184842423, 0.839952705153538, -0.341724222186957, 0.73255844164327, 0.939779325726615  
"12017", "SLIT2", 220.666125214106, 0.102943268618954, 0.301381424636566, 0.341571378339234, 0.732673479795733, 0.939783412290944  
"12018", "FOCAD", 60.1345717858837, 0.0877521352886524, 0.256978179013386, 0.341476990869646, 0.732744523666873, 0.939783412290944  
"12019", "JADE3", 11.5201182984582, -0.209541065945422, 0.613507623713787, -0.341545985487504, 0.73269259234573, 0.939783412290944  
"12020", "MOSM0", 209.046964748141, -0.0592411910444786, 0.173578563123913, -0.341293244847221, 0.732882832794876, 0.939882601292264  
"12021", "GUCA1B", 8.03899489291681, 0.1882510027174, 0.551942571551966, 0.341069909117666, 0.733050953526898, 0.939941810731753  
"12022", "SLC16A7", 122.172125414763, 0.0926337521293321, 0.27155257969333, 0.341126393400295, 0.733008432568688, 0.939941810731753  
"12023", "SIRT3", 47.3315961633935, 0.084803107697922, 0.248787617293493, 0.340865468388165, 0.733204861872317, 0.940060961969705  
"12024", "LINC01960", 6.67398654535897, 0.21521274165365, 0.631801775889829, 0.340633328151926, 0.733379636136928, 0.940113875964641  
"12025", "ZDHHC4", 163.400254754504, -0.0790810904091221, 0.23216025678807, -0.340631473720811, 0.733381032360863, 0.940113875964641  
"12026", "SGF29", 102.578587534211, -0.0833161299990952, 0.24463900834531, -0.340567641124075, 0.733429093243644, 0.940113875964641  
"12027", "ID2", 1038.6206819098, -0.0647678228314199, 0.190275768809847, -0.340389232094739, 0.733563426633631, 0.940120559029673  
"12028", "ATP6V0A2", 46.9452348309566, -0.104344458789635, 0.306495950144763, -0.340443189348345, 0.73352279856464, 0.940120559029673  
"12029", "PVR", 28.0126445015354, 0.130543386952433, 0.383592674695568, 0.340317726494743, 0.733617269190265, 0.940120559029673  
"12030", "BLZF1", 115.067532803304, 0.0646954052577337, 0.190232926460366, 0.340085212699562, 0.733792357361521, 0.940247766072681  
"12031", "DCXR", 74.2076094000186, 0.081880882481981, 0.240809193877274, 0.340023905082756, 0.733838525697076, 0.940247766072681  
"12032", "DHX35", 27.3868954695138, 0.112533187732201, 0.331347870254895, 0.339622486921775, 0.734140841573321, 0.940556937570872  
"12033", "DDO", 2.99097831844486, 0.327586885981913, 0.965090343050658, 0.339436497671719, 0.734280927694485, 0.940633488836621  
"12034", "HSPA2", 28.5125763515939, 0.12127097782993, 0.357329763169125, 0.33938112726572, 0.734322634100544, 0.940633488836621

"12035", "ID2-  
AS1", 4.13076973345837, -0.243119801956329, 0.716624566962382, -0.33925686  
2190563, 0.734416236586599, 0.94064579871355  
"12036", "SLC25A42", 27.2299127602512, 0.114286988995852, 0.33692467562397  
9, 0.339206348671834, 0.734454286948835, 0.94064579871355  
"12037", "KPNA1", 95.3747356163551, 0.0788116309346778, 0.232510156604096,  
0.338959949473835, 0.734639901632334, 0.940727204158699  
"12038", "IN080E", 113.426467091813, -0.0940064906801857, 0.27732815515398  
8, -0.338972040642567, 0.734630792886763, 0.940727204158699  
"12039", "AC093110.1", 4.86191278313573, 0.28836338897479, 0.8519055551135  
61, 0.338492204028826, 0.734992301031388, 0.940735114491073  
"12040", "AC006994.2", 2.83321379444069, 0.310291294201527, 0.917632859308  
875, 0.338143181179482, 0.735255291187766, 0.940735114491073  
"12041", "TOP2B", 208.956232917954, 0.0619328118993943, 0.183034796499477,  
0.338366327517245, 0.735087145921575, 0.940735114491073  
"12042", "HSPBAP1", 27.2551593544856, 0.125171946904878, 0.36998218947895,  
0.338318844702118, 0.735122924117421, 0.940735114491073  
"12043", "PDP1", 188.403004546521, 0.08394666867307, 0.248377764875587, 0.3  
37979805539836, 0.735378406073139, 0.940735114491073  
"12044", "LTBP3", 848.691949673, -0.0626375148803914, 0.185272609319024, -0  
.3380829746535, 0.735300660193188, 0.940735114491073  
"12045", "TBX5", 27.9293873388956, -0.193194376006256, 0.571123470230311, -  
0.338270769941127, 0.735159148928711, 0.940735114491073  
"12046", "SFSWAP", 231.040329055716, -0.0638541265390594, 0.18860492747598  
1, -0.338560224240119, 0.734941051138181, 0.940735114491073  
"12047", "SCFD1", 310.646390940932, -0.0579040412956048, 0.171295276389469  
, -0.338036415925154, 0.735335745448281, 0.940735114491073  
"12048", "PIGQ", 54.204162210454, 0.0865004836369494, 0.255447850686959, 0.  
338622867267544, 0.734893853733248, 0.940735114491073  
"12049", "DLG4", 38.5139596249245, -0.105786235643046, 0.312460611663864, -  
0.338558626892941, 0.734942254647407, 0.940735114491073  
"12050", "ZNF835", 14.6687214619423, 0.143446777823275, 0.424240104869291,  
0.33812639629502, 0.735267939449921, 0.940735114491073  
"12051", "RNF146", 362.369934629553, 0.0572913398337536, 0.169556474330214  
, 0.337889426281521, 0.735446516038889, 0.94074417432076  
"12052", "BANK1", 6.46922702244865, -0.251129670864469, 0.743701819021782,  
-0.337675213965173, 0.735607955118169, 0.940872604393178  
"12053", "CDK5R1", 3.81267982605225, 0.302517167061332, 0.896111347055827,  
0.33758881421963, 0.735673072771783, 0.940877824340582  
"12054", "TPM1", 1282.48102218404, -0.088315845907696, 0.261773887522197, -  
0.337374543899866, 0.735834571957098, 0.941006298881589  
"12055", "HNRNPD", 704.496925072745, -0.0590471965716882, 0.17506655284792  
, -0.337284281955231, 0.735902607415722, 0.941015237935575  
"12056", "HNMT", 531.061048398073, -0.0740076184520976, 0.219619969993799,  
-0.33698036865312, 0.736131699035949, 0.941152039532152  
"12057", "HOXC4", 65.1055844286576, -0.106139822044919, 0.314936310263965,  
-0.337019957958985, 0.736101855056675, 0.941152039532152  
"12058", "TMED5", 315.964134942356, -0.0806113776757374, 0.2396516393967, -  
0.336368980736659, 0.736592637873512, 0.941351391896209  
"12059", "AC132217.1", 35.9846717096795, 0.400102609937554, 1.188646443675

44,0.336603547729792,0.736415781425665,0.941351391896209  
"12060","ZNF214",21.1192490882615,-0.118293843874894,0.351679260625706  
,-0.336368552596551,0.73659296069102,0.941351391896209  
"12061","SLC35C1",73.5141692331443,0.0724851512235966,0.21539496744536  
1,0.336522027804498,0.736477243411338,0.941351391896209  
"12062","PYM1",96.7580545917523,-0.0845856541139635,0.25133858185302,-  
0.336540667534394,0.73646318982959,0.941351391896209  
"12063","NACC1",28.8809380402355,0.113417991537876,0.337325562332327,0  
.336227088020499,0.736699627482203,0.941409662408866  
"12064","MYOM2",15.5886255081496,0.154317801140278,0.459157358323044,0  
.336089138816995,0.736803648506445,0.941464542583459  
"12065","SLIT3",2186.11502468442,-0.118594037186837,0.353017729287498,  
-0.33594357265341,0.736913418352658,0.941526758715808  
"12066","TCTN2",30.7235604136491,0.11508867983883,0.342679903617093,0.  
335848932557855,0.736984788289647,0.941539906471482  
"12067","MCM3",100.958980131938,-0.0750122093664338,0.223452584269648,  
-0.335696316118296,0.73709988409386,0.941608909696433  
"12068","DLAT",61.3893312826903,-0.0737986784178165,0.219985901352527,  
-0.335470036780013,0.737270543681604,0.941670845211031  
"12069","AC010198.2",6.42839154219605,-0.236801426145007,0.70578867348  
2843,-0.335513213858289,0.737237978583944,0.941670845211031  
"12070","MEAF6",434.987446921236,-0.066623281026707,0.198735449329807,  
-0.335236019801096,0.737447052615265,0.941818253195055  
"12071","TRIM27",84.7073806096737,0.0748404259480135,0.223381157674338  
,0.33503464091238,0.737598955128252,0.941934213677575  
"12072","TMEM234",52.9852275660279,-0.0972393440784768,0.2909452922369  
96,-0.334218654410357,0.738214568386745,0.94194003573228  
"12073","ETV3",60.9029853007333,-0.105139978520822,0.314295484593019,-  
0.334525895772787,0.737982753333322,0.94194003573228  
"12074","TAF1B",122.90191725018,-0.0821650282113973,0.245797560654477,  
-0.334279266208417,0.738168834614441,0.94194003573228  
"12075","KIAA1841",44.0524048071988,0.100017010086684,0.29900676540101  
3,0.334497481863148,0.738004190762337,0.94194003573228  
"12076","SLC35A1",128.439007933013,-0.0769858575673455,0.2303364599200  
08,-0.334232181887667,0.738204361340343,0.94194003573228  
"12077","CALHM6",15.6339610923194,-0.140360223303314,0.419780987913455  
, -0.334365365141909,0.738103871478723,0.94194003573228  
"12078","APTR",54.1434996793946,0.100337330707483,0.299562236268148,0.  
334946527163952,0.737665423610021,0.94194003573228  
"12079","RNF26",66.9336980225586,0.0793931989774994,0.237382767660104,  
0.334452242511463,0.738038322895126,0.94194003573228  
"12080","DGKH",43.3392736712324,-0.137670890145629,0.411580244938244,-  
0.334493435578487,0.738007243577391,0.94194003573228  
"12081","NECTIN2",158.652236858639,-0.104718000820199,0.31287378727912  
3,-0.334697264768867,0.73785346496862,0.94194003573228  
"12082","KBTBD2",110.847410670647,0.0839170023905242,0.251233909363443  
,0.334019410847631,0.738364911317769,0.941975925512158  
"12083","RUSC2",75.6643587449263,-0.076480174388694,0.228939893539675,  
-0.334062243177553,0.738332590543178,0.941975925512158  
"12084","AC090617.10",6.33185569281485,0.243350162218657,0.72908872204

0761,0.333773044160533,0.738550825712389,0.942135135580642  
"12085","ZNF713",17.1804584012628,-0.123600147818789,0.370451015089304  
,-0.333647750402284,0.738645381346153,0.942177786797762  
"12086","ILVBL",146.122245871893,-0.0900499919056843,0.270022029918711  
,-0.333491278221979,0.73876347199836,0.942250448523475  
"12087","NDUF7",61.6425122059105,0.0863253863722233,0.25913648143188  
8,0.33312710697939,0.739038338446668,0.942290334976199  
"12088","ZNF311",2.48618941221772,0.295521740901103,0.887117302988691,  
0.33312588978424,0.73903925720806,0.942290334976199  
"12089","GSE1",128.031869080462,0.0916479661402044,0.275105208549396,0  
.333137880680106,0.73903020627453,0.942290334976199  
"12090","ZNF837",9.14732896923139,-0.177920064555359,0.533706280937975  
,-0.333367005242414,0.738857266078694,0.942290334976199  
"12091","AP001885.2",2.89409523756321,-0.312197106241132,0.93755792593  
9558,-0.33298967200162,0.73914207926089,0.942339101389169  
"12092","ABCC1",67.1911648401071,0.0791168676619797,0.237650101532687,  
0.332913249991176,0.739199767369305,0.942339101389169  
"12093","TAF8",56.3545615578273,0.0865220500096741,0.260073489133929,0  
.332683082377221,0.73937352113122,0.94248266172478  
"12094","CCDC77",26.6629417629549,-0.101248291585902,0.304509924826753  
,-0.332495867395804,0.739514859720819,0.942584881974237  
"12095","NCOA7",726.314898706344,0.0573304674427361,0.172804986012875,  
0.331763965644282,0.740067495839938,0.942899450233296  
"12096","TAX1BP1",600.362726090757,-0.0504063743149506,0.1518166607650  
55,-0.332021360902921,0.739873129418143,0.942899450233296  
"12097","MDK",357.276324962104,-0.117646718540249,0.354522924341092,-0  
.331845165609261,0.740006177662704,0.942899450233296  
"12098","CDK17",65.0005419147466,0.0929077366408368,0.279962425022857,  
0.331857879260945,0.739996577094517,0.942899450233296  
"12099","CYTH4",5.65868668481772,-0.273635703755641,0.824708646806149,  
-0.331796816748983,0.740042688119659,0.942899450233296  
"12100","ATP6V1B2",195.491887763663,0.0641978183013555,0.1936549470747  
82,0.331506213866898,0.74026214811212,0.94306950521887  
"12101","EPB41L1",100.232490557916,-0.0636385635112591,0.1921596883129  
21,-0.331175409733323,0.740511993364388,0.943309840319976  
"12102","DBR1",70.9120785310833,0.0693371075123873,0.209722083954504,0  
.330614240546213,0.74093588819539,0.943382069590479  
"12103","CCDC127",173.02716648698,-0.0707190543577239,0.21364120361451  
4,-0.331017861541946,0.740630993846424,0.943382069590479  
"12104","HOXC-  
AS1",41.569222805085,0.119592645302952,0.361605912177952,0.33072646567  
8189,0.740851109509435,0.943382069590479  
"12105","TSC2",131.949263100413,0.0722473363413379,0.218441221861479,0  
.330740396550027,0.740840585874023,0.943382069590479  
"12106","TADA2A",43.1532415833662,-0.103165719071689,0.312032464130877  
,-0.330624953909981,0.740927794819782,0.943382069590479  
"12107","RNF125",19.1963318047473,0.144004851330106,0.435459493117316,  
0.330696318730408,0.740873883231231,0.943382069590479  
"12108","ABHD3",32.6820186896146,0.0962509651406874,0.291340244562417,  
0.330373049851911,0.741118102502092,0.943536137270379

"12109", "PDE5A", 69.9412875127828, -0.129759150126895, 0.392900325768713, -0.330259716311051, 0.741203728534212, 0.943567220691625  
"12110", "AC118553.1", 5.02087499899351, -0.248765018130047, 0.754049857994367, -0.329905264874284, 0.741471545226691, 0.94359498405193  
"12111", "ITGA11", 847.36440961686, -0.103406314926529, 0.31348369462717, -0.329861861075458, 0.74150434245577, 0.94359498405193  
"12112", "LINC00921", 26.3936795881596, -0.111386119334812, 0.337489935284345, -0.33004278850854, 0.741367631292014, 0.94359498405193  
"12113", "GAN", 11.6125462181109, 0.17612253440715, 0.533700200509331, 0.330002751055872, 0.741397883418098, 0.94359498405193  
"12114", "PET117", 62.4526809819536, -0.0891810767650971, 0.270454854708421, -0.329744780737043, 0.741592814258134, 0.94359498405193  
"12115", "RRP1", 84.5948640725786, -0.0790302603550695, 0.23962518677461, -0.329807819531946, 0.741545178544225, 0.94359498405193  
"12116", "AIDA", 604.613100691892, 0.0608839271337887, 0.185008824387506, 0.329086611600027, 0.742090223557057, 0.943682626310182  
"12117", "AC006460.2", 5.39967762774194, 0.238035595363313, 0.723266525299596, 0.329111865456116, 0.742071136044023, 0.943682626310182  
"12118", "ARF3", 346.749144971602, 0.047300441487595, 0.143697104649791, 0.329167672535034, 0.742028956183129, 0.943682626310182  
"12119", "LEMD3", 93.1150919736531, 0.072693033453064, 0.220764962059492, 0.329277946893922, 0.741945611380613, 0.943682626310182  
"12120", "TBC1D10B", 99.9075196670712, -0.0729187156840848, 0.221537871227357, -0.329147857565404, 0.7420439325576, 0.943682626310182  
"12121", "ZNF396", 17.6280473571334, 0.139281379103367, 0.423089553736784, 0.329200704373849, 0.742003990569049, 0.943682626310182  
"12122", "TOP1", 459.596039646691, -0.0608946568918028, 0.185040162136914, -0.329088864755457, 0.742088520557869, 0.943682626310182  
"12123", "MRPS21", 723.877789043903, -0.0807269479274963, 0.245533485296061, -0.328781827171788, 0.742320599962723, 0.943732208673336  
"12124", "PON2", 125.279952532954, 0.0803022202425906, 0.244294251824343, 0.328711050886007, 0.742374100705344, 0.943732208673336  
"12125", "AC093799.1", 4.01566148224622, -0.319236912200896, 0.970713677524974, -0.328868253937509, 0.742255270500985, 0.943732208673336  
"12126", "NGFR", 8.14443254886224, 0.289696585650195, 0.8808531758753, 0.328881808665019, 0.742245024734089, 0.943732208673336  
"12127", "H2AFZ", 898.437419154272, -0.0804977065666979, 0.245085893705251, -0.328446918546472, 0.742573772867787, 0.943896170222484  
"12128", "ERI1", 44.6460746718087, 0.0845914986019177, 0.257603693364014, 0.3283784385901, 0.742625543461453, 0.943896170222484  
"12129", "ICE1", 157.89437951916, 0.0751657864696886, 0.229030389173443, 0.328191323173128, 0.7427670079603, 0.943926186954231  
"12130", "MTAP", 150.880062771218, 0.0568979273020218, 0.173371392673418, 0.328185212246643, 0.74277162813849, 0.943926186954231  
"12131", "ATP5ME", 1264.49667916916, -0.0912119331515904, 0.277999031899512, -0.328101621535721, 0.742834827992844, 0.943928684651693  
"12132", "AFTPH", 111.757231275698, -0.0832454431167525, 0.253905640726287, -0.32785976270016, 0.743017698302245, 0.944005424819015  
"12133", "PACS2", 167.840422616537, -0.0539630743465987, 0.164560324748359, -0.327922750694115, 0.742970071463326, 0.944005424819015

"12134", "IFT122", 62.0455610429611, -0.0740030517478499, 0.22594051898006  
2, -0.327533335242008, 0.743264534234264, 0.9441292223971  
"12135", "FPGS", 66.0789557237604, -0.0766416377844063, 0.234021261408842,  
-0.327498609840031, 0.743290794231293, 0.9441292223971  
"12136", "RDH5", 56.4855362906631, 0.079454263760122, 0.242677406029971, 0.  
327406926998013, 0.743360127942498, 0.9441292223971  
"12137", "P4HB", 1480.52540580727, -0.0717846415466342, 0.219236514076605,  
-0.327430135664133, 0.743342576556017, 0.9441292223971  
"12138", "SYNC", 134.881904783737, -0.104500973373558, 0.321708895475457, -  
0.324830848146475, 0.745309096043782, 0.944258405380543  
"12139", "ATRAID", 1154.13406593064, -0.0854792495133621, 0.26149709684567  
3, -0.326884124315189, 0.743755529026825, 0.944258405380543  
"12140", "RFX8", 12.1938633468307, -0.164438314245672, 0.502848278038873, -  
0.327013776177156, 0.743657465675485, 0.944258405380543  
"12141", "AC008063.1", 12.0812270095308, 0.19241280799926, 0.5900572158142  
22, 0.326091780326335, 0.744354915782917, 0.944258405380543  
"12142", "IDH1", 155.625305885756, 0.0520053317135582, 0.159269042489476, 0.  
.326525047810183, 0.744027141459666, 0.944258405380543  
"12143", "AC097634.1", 4.22825780157973, -0.231352070752227, 0.71267949523  
2137, -0.324622880691789, 0.745466508028851, 0.944258405380543  
"12144", "XXYLT1", 76.7402532595175, 0.0685823039805989, 0.211197803081059  
, 0.324730195958888, 0.745385279043704, 0.944258405380543  
"12145", "SFRP2", 1416.0077667693, 0.2063242218265, 0.633907000790239, 0.32  
5480270085821, 0.744817612623584, 0.944258405380543  
"12146", "PTCD2", 34.7986611965876, 0.106055340884606, 0.32660706918702, 0.  
324718448833933, 0.745394170530067, 0.944258405380543  
"12147", "AC008771.1", 35.8940617713203, 0.102763819440956, 0.314300204230  
353, 0.326960714812771, 0.743697598612948, 0.944258405380543  
"12148", "EPB41L4A-  
DT", 9.79941450110771, 0.236533814337508, 0.728697170227981, 0.32459823367  
1616, 0.745485164231045, 0.944258405380543  
"12149", "GRAMD2B", 83.3409010801408, 0.0958166089634145, 0.29403690908498  
9, 0.325865923640625, 0.744525798627718, 0.944258405380543  
"12150", "HEIH", 113.196174406417, 0.0808706792302803, 0.247841071761405, 0.  
.326300554849658, 0.744196968470817, 0.944258405380543  
"12151", "ABT1", 112.689787055081, -0.0779903166712028, 0.239049544335258,  
-0.32625168513948, 0.744233939639157, 0.944258405380543  
"12152", "RSBN1L", 349.767122236882, -0.0669837040481094, 0.20629242278355  
8, -0.324702687303201, 0.745406100603343, 0.944258405380543  
"12153", "ATP5MF", 815.07510639449, -0.0896836032019436, 0.275350674884252  
, -0.325706858135153, 0.744646154909841, 0.944258405380543  
"12154", "COPG2", 37.5523219930418, -0.0915289139983887, 0.281611815660381  
, -0.325018017385929, 0.745167435461047, 0.944258405380543  
"12155", "ST3GAL1", 109.071852826886, -0.0799987074068408, 0.2447975244030  
23, -0.326795410214749, 0.743822631129155, 0.944258405380543  
"12156", "ZNF7", 73.5170685875173, -0.0996172963656127, 0.306962267254424,  
-0.324526194234308, 0.745539694287337, 0.944258405380543  
"12157", "APTX", 99.3185796354031, -0.0817226739360032, 0.251714673592583,  
-0.32466392510862, 0.745435440387843, 0.944258405380543  
"12158", "RUFY2", 167.652579315209, 0.0573613519185864, 0.176187276178693,

0.32557034289133,0.744749453598581,0.944258405380543  
"12159","SUPV3L1",48.1693175276238,-0.0772283319512194,0.2371584102843  
39,-0.325640283465499,0.744696530220114,0.944258405380543  
"12160","ACTA2",302.951288028256,0.0701742223528153,0.21628191366804,0  
.324457191832148,0.745591926663501,0.944258405380543  
"12161","NAP1L1",1197.28426114755,-0.0499938352421898,0.15386975956130  
5,-0.32491007579869,0.745249130890156,0.944258405380543  
"12162","ALDH1L2",154.648561531685,0.089622662698439,0.275777769519862  
,0.32498146190128,0.745195102104101,0.944258405380543  
"12163","WDFY2",187.820316529017,0.102536445008058,0.316107229155326,0  
.324372350743282,0.745656149967736,0.944258405380543  
"12164","GDPD3",15.5553522129457,-0.139289304423692,0.428795917113053,  
-0.32483822458358,0.745303512963453,0.944258405380543  
"12165","ELAC2",87.7497510593124,-0.0653860790171297,0.200422155500482  
, -0.326241771294454,0.744241439784888,0.944258405380543  
"12166","AC138150.1",24.8589159112945,-0.121314312834049,0.37158947651  
4423,-0.326474027122616,0.744065737082128,0.944258405380543  
"12167","AC091132.4",17.0839548188106,0.21827120414452,0.6682124067065  
87,0.326649433554088,0.74393305006357,0.944258405380543  
"12168","TM6SF2",6.03932562440529,0.228842920665701,0.704229576463325,  
0.324954998077419,0.74521513118245,0.944258405380543  
"12169","ADNP-  
AS1",10.1899914583943,-0.157176026653574,0.483109463194429,-0.32534247  
1278229,0.744921890275523,0.944258405380543  
"12170","TAFAS",52.452595540743,-0.11350324566811,0.348287765145895,-0  
.325889270386987,0.74450813392988,0.944258405380543  
"12171","HDAC10",45.4364647943627,-0.0802135956885268,0.24541095181416  
3,-0.326854181101373,0.743778177436602,0.944258405380543  
"12172","FHL1",3147.95758567496,-0.0804225325179239,0.247943766917622,  
-0.324357952279736,0.745667049542481,0.944258405380543  
"12173","SLC10A3",100.720326658087,-0.0824519491847536,0.2538916481643  
91,-0.324752506751885,0.745368391931712,0.944258405380543  
"12174","EIF4A3",396.679100458069,-0.0704706131291119,0.21737909630448  
, -0.324183025539883,0.745799472394652,0.944348518725444  
"12175","PAX3",7.90187955994517,-0.258992724422798,0.799460456247105,-  
0.323959393362098,0.74596877712169,0.944407744688802  
"12176","SVIL",323.597094544493,-0.076403015288157,0.235835676078016,-  
0.323967164589985,0.745962893569312,0.944407744688802  
"12177","PSMC1",573.345581585219,-0.075148298760401,0.23220731743025,-  
0.323625885661307,0.746221287856629,0.944649844157834  
"12178","OTULIN",102.281353804141,0.0914213225499729,0.282929890999653  
,0.323123591597061,0.746601644276704,0.94465853685704  
"12179","PRDM1",27.6751827738699,0.155760124942087,0.481680765155222,0  
.323367956974353,0.746416593680073,0.94465853685704  
"12180","ADAT2",36.940935288957,0.113392348195101,0.351105680706739,0.  
322957885406051,0.746727136937037,0.94465853685704  
"12181","CLDN4",19.2080218453507,0.255585096253827,0.791360583355018,0  
.322969202193846,0.746718566290335,0.94465853685704  
"12182","TCTN1",203.360082267974,-0.0816203389847388,0.252660872051656  
, -0.323043051035031,0.746662638439304,0.94465853685704

"12183", "TGFB3", 103.377471749784, 0.0748490845778532, 0.231473927783297, 0.32335859720636, 0.746423681283388, 0.94465853685704  
"12184", "IMP3", 372.007077807079, -0.07312726104484, 0.226478373925003, -0.322888493843813, 0.746779690570217, 0.94465853685704  
"12185", "AP001020.2", 7.96212225333049, 0.222598082863848, 0.68834663210809, 0.323380797523673, 0.746406870320123, 0.94465853685704  
"12186", "COL6A1", 9286.91613832666, -0.0840028121536011, 0.260034641489626, -0.32304469770791, 0.746661391381787, 0.94465853685704  
"12187", "CBFA2T3", 2.70540978696533, 0.297914348882274, 0.92321911834777, 0.322690835752441, 0.746929393189601, 0.94469286150457  
"12188", "SIRT6", 58.1187852995713, -0.0987139712951538, 0.305839117450237, -0.322764374021631, 0.746873695535262, 0.94469286150457  
"12189", "FGD3", 2.66963954562088, 0.312271183885961, 0.967977036118642, 0.322601851318803, 0.746996791487715, 0.944700594042426  
"12190", "PRKAG1", 190.204643914661, -0.0835899453344547, 0.259344257720025, -0.322312689971698, 0.747215820484254, 0.944836152286  
"12191", "DNAJC14", 51.3958813324123, 0.0837984256488603, 0.260002528335634, 0.32229850296181, 0.747226567143602, 0.944836152286  
"12192", "ROGDI", 39.6723689804801, -0.123806557245081, 0.384482188529907, -0.32200856356562, 0.747446206984318, 0.944985470513885  
"12193", "MT-ND6", 237.520795511186, -0.123355354024058, 0.38311404001991, -0.321980771097941, 0.747467261886202, 0.944985470513885  
"12194", "C2orf74", 141.859331540651, -0.104729354696669, 0.325728893043396, -0.321523073124239, 0.747814029900736, 0.945036339639272  
"12195", "TNFSF10", 822.302693706135, -0.10219862684998, 0.317791538508544, -0.321590144689244, 0.747763210941179, 0.945036339639272  
"12196", "SLTM", 420.060502138572, -0.0557847919460518, 0.173475107606332, -0.321572314989679, 0.747776720087826, 0.945036339639272  
"12197", "TBKBP1", 19.6909079458108, 0.124392030840847, 0.386670389055659, 0.321700431069061, 0.747679651250337, 0.945036339639272  
"12198", "ZNF71", 31.6185318509218, 0.0983190727178286, 0.305644273717281, 0.321678111361488, 0.747696561783461, 0.945036339639272  
"12199", "AP000866.2", 4.27505558342313, -0.237109268315259, 0.737740443977496, -0.321399308186081, 0.747907807320989, 0.945077371083945  
"12200", "NUP210", 4.04806874600239, -0.252231308281349, 0.78503835504664, -0.321298069909417, 0.747984518931323, 0.945096832731667  
"12201", "S100A11", 7222.94769094653, -0.0896228702891457, 0.279178262270318, -0.321023813101777, 0.748192344972851, 0.945108372923541  
"12202", "AC091979.2", 3.24654135367126, -0.261898066778219, 0.816361704550756, -0.320811308661693, 0.748353388951643, 0.945108372923541  
"12203", "YBX3", 3221.08087248587, -0.0511713199770516, 0.159527178567732, -0.320768664226863, 0.748385707855585, 0.945108372923541  
"12204", "SUCLA2", 250.518790483539, -0.0812722803044185, 0.253349275944292, -0.320791444938998, 0.748368443000373, 0.945108372923541  
"12205", "STK24", 402.674776695138, 0.0665035183498806, 0.207307387803436, 0.320796663614023, 0.74836448793244, 0.945108372923541  
"12206", "NAPB", 29.6913626635461, 0.0989677826970123, 0.308301240554029, 0.321010004757565, 0.748202809129678, 0.945108372923541  
"12207", "SNHG17", 73.9595489737683, -0.104438917061016, 0.325639248999229



, -0.320719684073657, 0.74842282895087, 0.945108372923541  
"12208", "BB0F1", 65.4118243141569, -0.0756162685452691, 0.235889187455188  
, -0.320558434072499, 0.748545041276511, 0.94518527287659  
"12209", "C1GALT1C1L", 36.2323724848149, -0.117520228028326, 0.36702345676  
8177, -0.320198139549854, 0.748818133440326, 0.945387234897497  
"12210", "FIZ1", 19.6085205385514, 0.140667866020813, 0.439332279058009, 0.  
320185592377653, 0.748827644378751, 0.945387234897497  
"12211", "RFX5", 26.7484033551799, 0.101694069739287, 0.319420900789616, 0.  
31837011757182, 0.750204202659067, 0.945541931771733  
"12212", "CYB5R1", 189.290508451337, 0.0733685450443958, 0.230405112430981  
, 0.31843279982068, 0.750156661435557, 0.945541931771733  
"12213", "ANAPC13", 262.699237923426, -0.0721163141719198, 0.2265166151132  
6, -0.318370968663208, 0.750203557144189, 0.945541931771733  
"12214", "PPP2R3A", 70.3815119384106, -0.100574996511114, 0.31595050567958  
2, -0.318325163920171, 0.750238298248464, 0.945541931771733  
"12215", "AC005674.2", 4.12931705899164, -0.269573024559133, 0.84425728172  
388, -0.319301983405692, 0.749497528804463, 0.945541931771733  
"12216", "PRDM8", 122.667314608124, 0.0592409861034833, 0.185641140888653,  
0.319115611011117, 0.749638846188507, 0.945541931771733  
"12217", "CLINT1", 395.912556229639, 0.0538493496114933, 0.168811404421518  
, 0.318991183066238, 0.749733198701293, 0.945541931771733  
"12218", "LANCL2", 36.9231411786085, 0.106664896675426, 0.334124972818654,  
0.319236529301023, 0.749547158602644, 0.945541931771733  
"12219", "PURG", 5.94939868402291, 0.198641895742581, 0.62128079817731, 0.3  
19729655777789, 0.749173276841277, 0.945541931771733  
"12220", "SLA", 15.0520549901586, 0.172016402192689, 0.538866835756791, 0.3  
19218758287671, 0.749560633441657, 0.945541931771733  
"12221", "ANGPTL2", 2960.91411980067, -0.0684624058508131, 0.2145136000813  
61, -0.31915181986059, 0.749611390070189, 0.945541931771733  
"12222", "CARD9", 6.47578323899588, -0.196328632848287, 0.614570446203232,  
-0.31945667752361, 0.749380237948018, 0.945541931771733  
"12223", "AC016396.2", 3.51263254861018, -0.256928318054349, 0.80704337101  
8851, -0.318357509993534, 0.750213764965654, 0.945541931771733  
"12224", "RAB30-  
DT", 76.700466029684, 0.0966067846891204, 0.302805072935103, 0.31903951856  
7857, 0.749696545910812, 0.945541931771733  
"12225", "CCDC89", 31.9448113970711, -0.109283905293918, 0.343046741833954  
, -0.318568556312991, 0.750053700454798, 0.945541931771733  
"12226", "CMAS", 177.11129687708, -0.0539481717712548, 0.169316456172798, -  
0.318623322213863, 0.750012165942037, 0.945541931771733  
"12227", "MIR17HG", 15.6040522417798, -0.224742885798795, 0.70442182183368  
1, -0.319045888177863, 0.749691715880381, 0.945541931771733  
"12228", "CCPG1", 621.235977162631, -0.0403458696610344, 0.126564649731596  
, -0.318776765444345, 0.749895798306418, 0.945541931771733  
"12229", "AC015871.4", 3.0082480387514, -0.268294770772557, 0.842739043754  
916, -0.318360437623894, 0.750211544480357, 0.945541931771733  
"12230", "ERGIC3", 600.564636333176, -0.0506441015100722, 0.15839415350146  
6, -0.319734664383326, 0.749169479687193, 0.945541931771733  
"12231", "RNF113A", 59.4059127039958, -0.0814022194893951, 0.2551405640424  
19, -0.319048520547527, 0.749689719775861, 0.945541931771733

"12232", "CRY2", 129.903187516237, 0.076508368699077, 0.240495404514277, 0.318128193981916, 0.750387698006886, 0.945652907519305  
"12233", "TMEM69", 62.291114930392, -0.0855095390123723, 0.268958538951915, -0.317928329569265, 0.750539302764912, 0.945766643678666  
"12234", "CGAS", 37.9331796325283, 0.0898795464667313, 0.282818940273674, 0.3177988941609, 0.750637489584715, 0.945813053943794  
"12235", "AL365436.2", 4.7509248757966, 0.228193895671256, 0.718713992573038, 0.317503065237827, 0.750861913983398, 0.945906851358791  
"12236", "USP34", 321.877780981088, 0.0603088561367301, 0.190250646243755, 0.316996852980256, 0.751245990168715, 0.945906851358791  
"12237", "MRPL14", 306.505992084484, -0.08066944707034, 0.254506124112551, -0.316964659894256, 0.751270417971849, 0.945906851358791  
"12238", "DOCK8", 38.6734903425732, 0.169520934482889, 0.534724102628914, 0.317025048336998, 0.751224596008753, 0.945906851358791  
"12239", "KAT5", 146.658064212222, 0.0707641713546439, 0.223378871358339, 0.316789904633038, 0.751403024926931, 0.945906851358791  
"12240", "IGHMBP2", 21.1451695329998, 0.119196448372561, 0.376364530379688, 0.316704786852022, 0.751467616255102, 0.945906851358791  
"12241", "AP002490.1", 4.34169071833518, -0.248172992466253, 0.783695598186499, -0.316670137028375, 0.751493910650378, 0.945906851358791  
"12242", "EEF1AKMT1", 139.913208164261, -0.107760323972078, 0.339955310896104, -0.316983793216901, 0.751255899761128, 0.945906851358791  
"12243", "AC015871.7", 6.04590968747957, 0.198052999853583, 0.623906199294653, 0.317440346124927, 0.750909497230011, 0.945906851358791  
"12244", "TEL02", 69.5405312166642, -0.082423302133411, 0.259613863039842, -0.317484209696313, 0.750876219058731, 0.945906851358791  
"12245", "ITGB3", 69.5035008392755, 0.108378976019541, 0.342268060142404, 0.316649400398181, 0.751509647005586, 0.945906851358791  
"12246", "ILF3-DT", 203.769819058077, 0.0812665495662163, 0.256353952904539, 0.317009153342287, 0.751236656838469, 0.945906851358791  
"12247", "BCAM", 6.47005676000965, 0.200870067064059, 0.633090790086473, 0.317284772120319, 0.751027530989601, 0.945906851358791  
"12248", "ANKRD31", 2.45540285273422, 0.299317465899878, 0.945525846597874, 0.31656190782818, 0.751576043413175, 0.945913186578551  
"12249", "CDCA8", 2.64090564192999, -0.307740796686036, 0.973750440793111, -0.316036618617994, 0.751974713814038, 0.946140861038227  
"12250", "ZSCAN12", 9.34072551105183, 0.170860767810978, 0.540626964507068, 0.316041890301875, 0.75197071251897, 0.946140861038227  
"12251", "DNAJC25", 68.2465067629299, -0.0862401731440016, 0.272823514649007, -0.316102419745422, 0.751924770150095, 0.946140861038227  
"12252", "LRFN3", 49.9554536415381, -0.0793578268908736, 0.25113230696942, -0.316000071231524, 0.752002454066841, 0.946140861038227  
"12253", "AC138969.1", 9.74662948574336, -0.206796923090396, 0.655017146170366, -0.315712228755321, 0.75222094389565, 0.946338517110213  
"12254", "NPIP11", 7.48678229019125, 0.214940508671251, 0.681573982464411, 0.315359028075099, 0.752489071679124, 0.946598583314322  
"12255", "WWTR1", 252.854302509914, 0.0664697023671222, 0.21093875949821, 0.315113744506904, 0.752675293140486, 0.946755580886217  
"12256", "UROD", 315.250939590839, -0.0852621250216899, 0.270779901144933,

-0.31487612138559,0.752855712449442,0.946764101125324  
"12257","CMC1",240.815368008311,-0.0811922237887895,0.257865939508489,  
-0.31486214869458,0.752866321867936,0.946764101125324  
"12258","AL606970.4",22.3941662591801,0.153078407148094,0.486117094554  
869,0.314900275803438,0.752837372189219,0.946764101125324  
"12259","DBI",1865.90853304995,0.084160422427621,0.267477644321056,0.3  
14644697283944,0.753031438025777,0.946793341834238  
"12260","TARS",212.804072645089,0.0619740316398185,0.197132203261832,0  
.314378019493367,0.753233948396808,0.946793341834238  
"12261","PACRG",5.25698037010837,-0.233567132460357,0.743831607744795,  
-0.31400538781688,0.753516946698942,0.946793341834238  
"12262","TTC26",34.4040259150234,-0.109956598937341,0.349687366716631,  
-0.314442583298824,0.753184918233074,0.946793341834238  
"12263","TMEM138",76.6131519205305,-0.066217531117336,0.21092251708687  
2,-0.313942446884717,0.753564750996316,0.946793341834238  
"12264","SNX6",696.251839127332,-0.0480155295469154,0.153087878761439,  
-0.313646840856285,0.753789279505221,0.946793341834238  
"12265","ARHGAP11A",5.33073928477095,0.237987854044013,0.7588045019199  
09,0.313635268955128,0.753798069403482,0.946793341834238  
"12266","RMC1",38.2238322122873,-0.103363939723025,0.32958505488008,-0  
.313618406516139,0.753810877997509,0.946793341834238  
"12267","TICAM1",46.4773554613761,-0.0915556191447497,0.29135808008196  
4,-0.314237446646386,0.753340703751226,0.946793341834238  
"12268","U2AF2",128.035037467539,-0.0617827966015977,0.196828501134942  
, -0.313891515940775,0.753603434273265,0.946793341834238  
"12269","SIRPA",230.149996414482,-0.0560701407430822,0.178692201004952  
, -0.313780570320068,0.753687702281471,0.946793341834238  
"12270","ZSWIM3",8.35944251156083,0.166493280304344,0.529577494628318,  
0.314388889243107,0.753225693770176,0.946793341834238  
"12271","TXNRD2",71.6870733299952,0.0898823615842886,0.286045558842381  
,0.314223936732457,0.753350963844848,0.946793341834238  
"12272","MAFF",1021.15336691402,-0.11689680752795,0.37145363876051,-0.  
314700935271541,0.752988734067269,0.946793341834238  
"12273","VBP1",246.333144029423,-0.0813537314225238,0.259104064764404,  
-0.313980915337999,0.753535533690787,0.946793341834238  
"12274","NEK11",78.0937773287133,0.0770990727290579,0.245916022133502,  
0.313517891433697,0.753887229976037,0.946812094678231  
"12275","ZSWIM7",192.633829368907,-0.104566219047623,0.334055362903151  
, -0.313020626697553,0.754264991223767,0.947209355577546  
"12276","PRDM16-  
DT",3.0875628223013,-0.366108337297263,1.17174667563706,-0.31244666181  
6401,0.754701093014303,0.947290713964704  
"12277","NGF",4.07845803098906,-0.231268325024959,0.739622166022291,-0  
.312684415975155,0.754520436551797,0.947290713964704  
"12278","ECT2",16.2455762758727,0.132455940907184,0.423883493498448,0.  
312481950674657,0.754674278080602,0.947290713964704  
"12279","ADAMTS6",24.293530630729,0.207441679550657,0.664435334226746,  
0.312207477334228,0.754882849843816,0.947290713964704  
"12280","HIP1",80.6520112594211,0.0861905065560139,0.275529918430639,0  
.312817232505773,0.754419522335283,0.947290713964704

"12281", "NSMF", 57.9136153319598, -0.0749753182544173, 0.240092085933124, -0.312277341266889, 0.7548297586795, 0.947290713964704  
"12282", "DKK1", 90.0302618159632, -0.346182878035453, 1.10693082786249, -0.312741202360349, 0.754477289650766, 0.947290713964704  
"12283", "DNAJB12", 227.848911759069, -0.0580020834297905, 0.185684118976442, -0.312369650940096, 0.754759612271425, 0.947290713964704  
"12284", "ALG8", 72.3396199119201, 0.0695372360763129, 0.222619348660835, 0.312359354632082, 0.754767436367731, 0.947290713964704  
"12285", "SPAG7", 358.061822052529, -0.0732059387268704, 0.234558036569858, -0.312101600940319, 0.754963309889739, 0.947314564261321  
"12286", "FBX011", 207.048818408157, 0.0631618615938222, 0.202707341218309, 0.311591386943401, 0.755351080812179, 0.947346990937755  
"12287", "CRYGN", 4.49214876478915, 0.263958586104252, 0.847700537377998, 0.311381878936513, 0.755510328160317, 0.947346990937755  
"12288", "CCL27", 2.52298554871949, -0.294181524936466, 0.943890093876035, -0.311669257729388, 0.755291893761387, 0.947346990937755  
"12289", "GADD45G", 135.383275996375, -0.0858695650123737, 0.275356713379382, -0.311848452716182, 0.755155698938904, 0.947346990937755  
"12290", "OTUD1", 170.496521439669, -0.0995383098574415, 0.319279373651707, -0.3117592869185, 0.75522346729437, 0.947346990937755  
"12291", "TMEM101", 147.597092491093, -0.0836440743626901, 0.26852657028509, -0.311492729653853, 0.755426069070286, 0.947346990937755  
"12292", "TRAPPC10", 69.2412308814552, -0.0723625819386035, 0.232391049934562, -0.311382826313578, 0.755509608034211, 0.947346990937755  
"12293", "CCDC160", 7.75563890688672, -0.212364149850581, 0.681266608931911, -0.31171959269151, 0.75525363655872, 0.947346990937755  
"12294", "FAM122C", 14.568341746819, 0.146212987529631, 0.469624998515939, 0.311339873285449, 0.755542257968781, 0.947346990937755  
"12295", "HNRNPK", 1559.91862364141, 0.0369262603247368, 0.118657585937448, 0.31120016502108, 0.755648457591547, 0.947403088554185  
"12296", "APPL1", 484.008950178844, 0.0485215443784548, 0.155993156075934, 0.311049187022253, 0.755763229125098, 0.947434198383391  
"12297", "HOXA4", 16.5083444238655, 0.164439679209699, 0.5288725305336, 0.310924976655131, 0.755857656290557, 0.947434198383391  
"12298", "MAGI2", 109.968351327334, 0.0789478707460291, 0.253879045792394, 0.310966470271782, 0.755826111620902, 0.947434198383391  
"12299", "NTNG1", 11.6706747314589, -0.175702125330357, 0.565496571898363, -0.310704138736913, 0.756025550626969, 0.947540251809323  
"12300", "UQCC1", 55.2546190447028, 0.0742842028902619, 0.239123541514517, 0.310651985244842, 0.756065202546524, 0.947540251809323  
"12301", "AJAP1", 3.24190535008834, -0.310923899004623, 1.002457129279, -0.310161791385783, 0.756437924744176, 0.947668651034638  
"12302", "BRAT1", 80.3737943412227, -0.0668857180562022, 0.215545311491517, -0.310309315444492, 0.756325747868849, 0.947668651034638  
"12303", "C10orf143", 15.8831433263672, -0.142983814441659, 0.460996990661822, -0.310162142786196, 0.756437657534201, 0.947668651034638  
"12304", "TMUB2", 144.561011562222, 0.0632708774693624, 0.204001082746323, 0.31014971399951, 0.756447108581743, 0.947668651034638  
"12305", "MICALL1", 14.493414149229, 0.148762732098076, 0.47970494906355, 0.310112981716118, 0.756475040608578, 0.947668651034638

"12306", "Clorf198", 48.8393400996795, -0.0991676579266423, 0.319880512006  
81, -0.310014690499592, 0.756549784951181, 0.947673028381569  
"12307", "SCNN1A", 3.29929631918874, 0.274663139172954, 0.886178523190782,  
0.309941091986747, 0.756605753523256, 0.947673028381569  
"12308", "SUPT6H", 185.680855173531, 0.068604481187597, 0.22140058132873, 0  
.309865858417665, 0.75666296680638, 0.947673028381569  
"12309", "AC091488.1", 3.79455142437653, -0.22304962561206, 0.720759055554  
619, -0.309464895228301, 0.756967911962517, 0.947723700117726  
"12310", "PYCR3", 20.2342225957338, -0.13307053187589, 0.429849490730102, -  
0.309574711022382, 0.756884389821761, 0.947723700117726  
"12311", "MORN4", 48.0552739675009, -0.125539879696544, 0.405674136384826,  
-0.309459904975199, 0.756971707445948, 0.947723700117726  
"12312", "MOB3A", 112.796764442401, 0.0568179631246134, 0.183634155771885,  
0.309408469714066, 0.757010828384662, 0.947723700117726  
"12313", "USE1", 251.949184718924, -0.0794347128271298, 0.256636865416537,  
-0.309521832329906, 0.7569246071941, 0.947723700117726  
"12314", "S100A14", 3.23379307757602, 0.263144022822622, 0.8509537988056, 0  
.309234206594965, 0.757143375098009, 0.947735698508794  
"12315", "SMIM33", 3.13783017175142, -0.256714858106488, 0.830076643628958  
, -0.309266451570271, 0.757118848626821, 0.947735698508794  
"12316", "MT01", 56.1146427159914, 0.0751179493152201, 0.243254990089164, 0  
.308803323161782, 0.757471141097864, 0.948068986685903  
"12317", "CDKN2B-  
AS1", 4.79126436921871, -0.217463745065489, 0.704405524069666, -0.30871953  
3897326, 0.75753488329173, 0.948071789067306  
"12318", "KCNAB2", 23.9606041536099, 0.100948133393236, 0.327187698519558,  
0.308532789741182, 0.757676953750532, 0.94817261260468  
"12319", "BORCS6", 50.0080935585879, 0.0829796973078546, 0.269127803810445  
, 0.30832822253468, 0.757832593165865, 0.948290398867749  
"12320", "AC010359.3", 18.1163188547623, 0.134964246355595, 0.438265096548  
26, 0.307951163390748, 0.758119493508325, 0.948457496081002  
"12321", "PCDHGA11", 4.24725486567915, -0.224906519599268, 0.7306751249737  
29, -0.307806454485985, 0.75822960992475, 0.948457496081002  
"12322", "TNXB", 7976.05309203377, 0.0471455468196168, 0.153210509609545, 0  
.307717446667116, 0.758297342968811, 0.948457496081002  
"12323", "AC105206.1", 3.06912228413279, -0.283498339878535, 0.92168589436  
9727, -0.307586718653646, 0.758396827550725, 0.948457496081002  
"12324", "MSC-  
AS1", 66.7006214537703, -0.0775037949096271, 0.251928477798589, -0.3076420  
56137812, 0.758354714998305, 0.948457496081002  
"12325", "ZNF568", 41.6880626256697, -0.078486137958424, 0.254860632744741  
, -0.307957086636572, 0.758114986311762, 0.948457496081002  
"12326", "MED12", 55.4082113373357, 0.0765361954409242, 0.248599763888063,  
0.307869139712402, 0.75818190892346, 0.948457496081002  
"12327", "GUCY1A1", 12.7475510401939, 0.383305205120404, 1.24665943366536,  
0.307465852156134, 0.758488811035612, 0.948495580604685  
"12328", "PROX1", 12.4020929460877, -0.198696932669138, 0.646870211806766,  
-0.30716661401699, 0.758716556066765, 0.948634184132938  
"12329", "INSIG2", 180.856322551202, -0.0499147953091895, 0.16254779552669  
8, -0.307077651514451, 0.758784267944153, 0.948634184132938

"12330", "FBX021", 160.896238915613, -0.0679238736074114, 0.22119367831249  
9, -0.30707872903786, 0.758783447799536, 0.948634184132938  
"12331", "MKX", 3.4196569518489, 0.39867159062285, 1.2989876279065, 0.30690  
9459380584, 0.758912288789463, 0.948717292327433  
"12332", "ZNF517", 8.72135778656, -0.164416231207011, 0.536036158041455, -0  
.306726008573279, 0.759051931436278, 0.948814914295347  
"12333", "ADGRB2", 4.78026352608882, 0.22875309870009, 0.746169682460708, 0  
.306569811233433, 0.759170834953302, 0.948886598622002  
"12334", "CEBPZ", 281.064365713579, -0.0634258166322944, 0.206989269130032  
, -0.306420796106343, 0.759284276396612, 0.948951444839774  
"12335", "SDC1", 3.00143394355779, -0.354429047707847, 1.15982761433138, -0  
.305587695385378, 0.759918590250939, 0.949282420479597  
"12336", "YTHDC1", 359.941332589417, 0.0667246981093965, 0.218321518352839  
, 0.305625843081394, 0.75988954147745, 0.949282420479597  
"12337", "NRF1", 29.3030473411173, 0.104860539215432, 0.342723397820746, 0.  
305962592230943, 0.759633127847871, 0.949282420479597  
"12338", "ERP44", 438.810035625775, -0.0617414470952859, 0.201979600933806  
, -0.305681597596186, 0.759847086042399, 0.949282420479597  
"12339", "MRVI1", 3.46535067408414, -0.28708403093255, 0.939131969982501, -  
0.305690829519838, 0.759840056271919, 0.949282420479597  
"12340", "ZNF579", 45.8328920273113, -0.0859059042125701, 0.28086842397224  
6, -0.305858177283249, 0.759712630541844, 0.949282420479597  
"12341", "TBX19", 19.1606188508531, 0.131806128621899, 0.431998481710207, 0  
.305107851537119, 0.760284011480631, 0.949297490358069  
"12342", "RH0Q", 591.391997392794, -0.0743749335630718, 0.2446892321187, -0  
.303956708348295, 0.76116087332451, 0.949297490358069  
"12343", "MEIS1-  
AS2", 9.05441023375684, -0.160200452157362, 0.525413381050655, -0.30490363  
9562841, 0.760439543704458, 0.949297490358069  
"12344", "AMT", 22.5783577760285, 0.124842904776819, 0.409645326315993, 0.3  
04758523426964, 0.760550073155572, 0.949297490358069  
"12345", "TIMMDC1", 311.690513007896, -0.0694304988616133, 0.2280599294120  
82, -0.304439710389278, 0.760792918105782, 0.949297490358069  
"12346", "FAM13A", 382.080782303634, 0.0812671627240628, 0.266094490838793  
, 0.30540715994491, 0.760056069283024, 0.949297490358069  
"12347", "AC099522.2", 4.80717295037202, 0.245131716154829, 0.804176236444  
872, 0.30482337707281, 0.760500675991535, 0.949297490358069  
"12348", "MOC51", 30.1603420738364, 0.100715929236917, 0.331214880215993, 0  
.304080327463663, 0.761066694043995, 0.949297490358069  
"12349", "C7orf26", 69.6524498623811, 0.065475058648416, 0.215158684264171  
, 0.3043105551251, 0.760891304430199, 0.949297490358069  
"12350", "CDK13", 229.114160514828, 0.0823386934949056, 0.270302300671167,  
0.304617065006317, 0.760657821368933, 0.949297490358069  
"12351", "AL583785.1", 57.0317149878605, 0.163686129877581, 0.538313836182  
727, 0.304071935134171, 0.761073087632125, 0.949297490358069  
"12352", "BET1L", 104.05541015217, -0.0683067635491698, 0.223848820991295,  
-0.305146854232599, 0.760254307292358, 0.949297490358069  
"12353", "TWF1", 179.112264013941, -0.0527799909427123, 0.173613468477669,  
-0.30400861986984, 0.7611213240766, 0.949297490358069  
"12354", "METTL25", 39.7514658204622, 0.0952091993364301, 0.31208232751479

2,0.305077189389769,0.760307363812214,0.949297490358069  
"12355","MED6",155.568565870915,-0.0591376123093853,0.193939358356638,  
-0.30492836941657,0.760420708401437,0.949297490358069  
"12356","SETD1A",51.353282102008,0.076626857077682,0.252093687545136,0  
.303961823970552,0.761156975915113,0.949297490358069  
"12357","GOSR1",253.549183301888,-0.06144352126054,0.201427855774001,-  
0.305039841805588,0.760335808076325,0.949297490358069  
"12358","RAPGEFL1",7.95180505320822,-0.179309624247849,0.5887352182179  
09,-0.304567518129144,0.760695562090163,0.949297490358069  
"12359","PRR22",2.3615812713662,-0.280695461071277,0.923477563112998,-  
0.3039548249825,0.761162308194988,0.949297490358069  
"12360","ZNF283",24.5576405754724,-0.116962895290704,0.384046102321705  
, -0.304554308932232,0.760705623862191,0.949297490358069  
"12361","WDR41",165.171406566136,-0.0547178334679437,0.180193898280067  
, -0.303660856389811,0.761386282643476,0.949325327108538  
"12362","AC079174.2",4.78412039875886,0.223795256219697,0.737019838011  
018,0.303648890677962,0.761395399733894,0.949325327108538  
"12363","CLCN7",92.3260574484796,-0.0581309197277237,0.191470672638345  
, -0.303602211903872,0.761430966225752,0.949325327108538  
"12364","PRSS53",10.4420515288986,-0.145721089559313,0.479733732038086  
, -0.303754103219375,0.761315235788472,0.949325327108538  
"12365","NFKB1",252.142207436479,0.0524199455127146,0.172742246376183,  
0.303457588472938,0.761541164009205,0.949367733517844  
"12366","AC073073.2",2.7782258296515,0.333692437580913,1.0998580224379  
1,0.303395920903739,0.761588153920315,0.949367733517844  
"12367","UBQLN4",36.5214062863117,0.0939019751095673,0.310165076116032  
, 0.302748382524017,0.762081623064482,0.949368693998626  
"12368","CCDC149",66.212194438029,-0.0762565167067549,0.25165577800248  
4,-0.303019137140583,0.761875277492879,0.949368693998626  
"12369","DOLK",63.4238628252597,0.0948842123720635,0.312834443699737,0  
.303304876694252,0.761657530068469,0.949368693998626  
"12370","TIMM23",78.1237704483301,-0.073164618501002,0.241521301226034  
, -0.302932363023869,0.76194140731932,0.949368693998626  
"12371","PRKD1",33.4844711358082,0.08504147246768,0.280838329477288,0.  
302812912418201,0.76203244246732,0.949368693998626  
"12372","AP5M1",76.5701315130089,0.066196391739398,0.218559623511944,0  
.302875666949437,0.761984615861027,0.949368693998626  
"12373","AC087286.2",3.56453963846058,0.239249546977441,0.790131310063  
473,0.302797198301408,0.762044418683088,0.949368693998626  
"12374","EFHC2",4.1379125098464,0.241397897308078,0.796781763478243,0.  
302966142515973,0.761915664045083,0.949368693998626  
"12375","MCM4",48.7722456185686,-0.0835703717782322,0.276203858500503,  
-0.302567720204676,0.762219317548627,0.949463497374714  
"12376","DNAJB6",531.172812910341,-0.050491399352148,0.166938582436988  
, -0.302454942500823,0.762305276575648,0.949480069654121  
"12377","PLAGL2",35.110081241722,0.0823178069287945,0.272297959519513,  
0.302307836144088,0.762417405266215,0.949480069654121  
"12378","AC02",140.273054331044,0.0610895654318798,0.202035243803167,0  
.302370835315229,0.762369384877767,0.949480069654121  
"12379","CENPE",16.1429044001412,0.153836603368965,0.509255386978003,0

.302081445386084,0.762589976546286,0.949618263871152  
"12380","HOXA-  
AS2",5.05472618679113,0.204770280316879,0.678614709480745,0.3017474827  
116,0.762844568404027,0.94978184491948  
"12381","AC011468.1",9.01092642936798,0.180357852463602,0.597646236967  
13,0.301780286242346,0.762819559946203,0.94978184491948  
"12382","GZMK",18.1332023136658,0.163089049842933,0.54065356023386,0.3  
0165167093765,0.762917613931332,0.949796076461919  
"12383","SHC1",198.167237216288,0.065956747903331,0.218843842699913,0.  
30138726815254,0.76311920178628,0.94982763480519  
"12384","ZNF416",10.7030520135849,-0.141781042646378,0.470219540954123  
, -0.301520949892236,0.763017277193354,0.94982763480519  
"12385","ARMCX1",415.748001276649,0.0641129502639855,0.212734113266139  
, 0.301375972474041,0.763127814275853,0.94982763480519  
"12386","ETS1",139.572303910783,0.0969940242104548,0.322016892066381,0.  
.301207876357183,0.763255984104957,0.949910463020985  
"12387","COL27A1",16.6610233978741,0.159052997602601,0.528860010410858  
, 0.300746879082494,0.763607518331597,0.950271243649113  
"12388","STXBP5-  
AS1",2.98340121006718,0.262212327459759,0.872294491599302,0.3006006916  
07037,0.763719004012516,0.95032522067017  
"12389","MAFB",824.087034527491,0.0827467471967198,0.275337594787469,0.  
.300528328725292,0.763774191299561,0.95032522067017  
"12390","MMRN2",6.59879932915654,-0.17586767455394,0.585405694078115,-  
0.300420163884624,0.763856685057288,0.950351154169337  
"12391","IFI35",199.114879227875,-0.0814135381464743,0.271176727123336  
, -0.300223175528798,0.764006928467366,0.95046136730889  
"12392","ATAD3B",23.1872249557163,-0.108973200229458,0.363202854195459  
, -0.30003398643672,0.764151231728547,0.950468222602272  
"12393","KIF9-  
AS1",5.1717700115403,0.19005824090299,0.633279213730889,0.300117604971  
249,0.764087450998623,0.950468222602272  
"12394","SFMBT1",30.8671949454605,-0.0906606328034019,0.30247963742638  
1,-0.299724747010341,0.764387120561196,0.950468222602272  
"12395","CC2D2A",114.028181556794,0.0747054980287082,0.249340952670566  
, 0.299611825608971,0.764473262821534,0.950468222602272  
"12396","AC067838.1",8.92846481191575,-0.148482393038437,0.49501339863  
8771,-0.299956311176113,0.764210480610677,0.950468222602272  
"12397","CWF19L2",273.850119451272,0.0804297344986108,0.26847451790520  
3,0.29958051559668,0.764497148227478,0.950468222602272  
"12398","NAA30",73.1498741339615,0.0788831676296286,0.263366469667325,  
0.29951864308798,0.764544349442234,0.950468222602272  
"12399","SERPINF1",6812.31517055154,-0.0843331159064359,0.281590524764  
327,-0.299488471698461,0.764567366867867,0.950468222602272  
"12400","MYCBPAP",2.88642201340852,0.274197127033296,0.915315572260912  
, 0.299565674771603,0.764508469896048,0.950468222602272  
"12401","WARS2",103.617994019175,0.0691237041819339,0.231013694751599,  
0.299219075545544,0.764772895486446,0.950476549121723  
"12402","RNF25",29.6564121387539,-0.104162346579567,0.348168711824286,  
-0.299172048038987,0.764808775568769,0.950476549121723



"12403", "SMUG1", 95.1093106405264, 0.0770686168968871, 0.257679673614796, 0.299086908236684, 0.764873735072948, 0.950476549121723  
"12404", "CNEP1R1", 54.0197665316779, 0.0786802237922218, 0.262929474038115, 0.299244594315874, 0.764753425909813, 0.950476549121723  
"12405", "STARD3", 105.231877909165, -0.066067010023217, 0.220904043530227, -0.299075602996724, 0.764882360807978, 0.950476549121723  
"12406", "RRAGC", 390.744304959052, 0.0665320295703519, 0.222631820990737, 0.298843306739696, 0.765059605956543, 0.950620169742069  
"12407", "ARL6", 35.2190589020915, 0.085093052418787, 0.284955013976584, 0.298619249513467, 0.765230576272519, 0.950702220091976  
"12408", "MBD4", 204.144730196345, -0.0535302245073396, 0.179273606823346, -0.298595122036495, 0.76524898779768, 0.950702220091976  
"12409", "NFKBIA", 3053.74868683362, -0.0833390311849013, 0.279180168003903, -0.29851343589612, 0.765311322959725, 0.950703041616904  
"12410", "AC073611.1", 17.4707447295537, 0.16582972141456, 0.555692979049886, 0.298419680770653, 0.765382869906952, 0.950715305367903  
"12411", "CIAPIN1", 95.6813281228377, 0.0680889363725893, 0.228367617538761, 0.298154953431751, 0.765584900951084, 0.950824841117828  
"12412", "C18orf25", 57.4165131690497, 0.0810479784135236, 0.271843102935147, 0.298142485641282, 0.76559441634476, 0.950824841117828  
"12413", "WDR33", 296.780864609856, -0.0478253073454645, 0.160509468965147, -0.297959414194121, 0.765734140192711, 0.950921757115173  
"12414", "RNF122", 25.2727170443405, -0.177761208879912, 0.596916840477481, -0.297798950918722, 0.765856615292875, 0.950997238983379  
"12415", "ATF7IP2", 15.7271353191831, 0.161752928634651, 0.544037873593067, 0.29731924280632, 0.766222791900064, 0.951375299004389  
"12416", "SATB2-AS1", 7.61463084467349, 0.169596386080385, 0.571709130413712, 0.296648027918774, 0.76673523943033, 0.951398512100018  
"12417", "DNAJB2", 152.495985420119, -0.0620401189076777, 0.209093607610552, -0.296709782841524, 0.766688087584622, 0.951398512100018  
"12418", "MYOF", 784.197257821536, 0.0598031997953842, 0.201492912103378, 0.296800513581845, 0.766618813348718, 0.951398512100018  
"12419", "PWWP2B", 8.35471821439575, 0.191630620586986, 0.64529791954179, 0.296964572151508, 0.766493556988312, 0.951398512100018  
"12420", "BCL9L", 203.550319363442, -0.0796556568513555, 0.268500460062379, -0.296668604712445, 0.766719528298591, 0.951398512100018  
"12421", "PIGBOS1", 175.121632798348, 0.0573274864555999, 0.193110055525815, 0.296864325886625, 0.766570092846035, 0.951398512100018  
"12422", "FAM104A", 125.794961058564, 0.063128778501479, 0.21255337063323, 0.297002010899232, 0.766464973897487, 0.951398512100018  
"12423", "LINC01436", 73.8414615996863, -0.277071012308268, 0.933555770855737, -0.29679106589882, 0.766626026704705, 0.951398512100018  
"12424", "MYOC", 1955.78861437848, -0.219354840411181, 0.740652885194619, -0.29616416110165, 0.76710471700578, 0.951413646810541  
"12425", "RTN4IP1", 12.858158526691, 0.141261153958781, 0.476549665546962, 0.296424830760605, 0.766905664754045, 0.951413646810541  
"12426", "CCN6", 4.13045786236443, -0.213409721508204, 0.72072925832236, -0.296102480985658, 0.767151819350668, 0.951413646810541  
"12427", "AC004943.2", 6.55833989488368, 0.178751366512918, 0.603176680673

593,0.296349929034556,0.766962859545893,0.951413646810541  
"12428","PDRG1",74.413877950409,0.0878490661058684,0.296491971896327,0  
.296294923413934,0.767004862524301,0.951413646810541  
"12429","LINC01638",24.1402442620571,-0.108719109869342,0.366874769870  
498,-0.296338475136129,0.766971605829245,0.951413646810541  
"12430","OSM",4.65230949884504,-0.270191885175827,0.912606120150261,-0  
.296066264744466,0.767179476474539,0.951413646810541  
"12431","MOAP1",88.4841672977333,0.0687747566916775,0.232536310804298,  
0.29575921478155,0.76741397210376,0.95162789638641  
"12432","RIC3",2.37300382789172,-0.283840253469873,0.960637404687311,-  
0.295470748989066,0.767634294308981,0.951747980919564  
"12433","SPATA13",107.386139411588,0.0778910285383191,0.26360132607283  
,0.295487999619542,0.767621118225758,0.951747980919564  
"12434","GATA3",5.2118735453745,0.256204838854235,0.867484016211344,0.  
295342431752444,0.767732305506128,0.951792945904533  
"12435","PHLPP2",44.6722196181742,0.0854290977677136,0.28941213137929,  
0.295181467896915,0.767855258076814,0.951868822135431  
"12436","SENP5",114.943621782364,-0.0631044321889296,0.214075830680078  
, -0.294776070649634,0.768164947473123,0.952040182387999  
"12437","GPRIN3",8.03917107662372,-0.206641134792794,0.700784543554,-0  
.294871136490571,0.76809232184366,0.952040182387999  
"12438","ALG2",112.325138119631,-0.0534871407562801,0.181461217672341,  
-0.294757973314497,0.768178773178199,0.952040182387999  
"12439","AP001160.1",8.66070588697219,-0.189470767734894,0.64341931807  
3356,-0.294474788699603,0.768395125516102,0.952231759774155  
"12440","MAP4K4",385.847246483942,-0.0761546965306949,0.25913667866134  
2,-0.293878492709321,0.768850753138171,0.952260514191299  
"12441","BLOC1S4",174.13753581509,-0.0664491495596523,0.22603798336260  
7,-0.293973378151474,0.768778246167014,0.952260514191299  
"12442","KCNC1",4.53204702452449,-0.248740600935914,0.846383958904359,  
-0.293886241957974,0.768844831452708,0.952260514191299  
"12443","AL136295.2",5.19840583905405,-0.194372684990501,0.66135220498  
8609,-0.293901923248065,0.76883284843964,0.952260514191299  
"12444","OSER1-  
DT",77.9828268310874,0.0842397808792534,0.286483917738987,0.2940471547  
02776,0.768721871010346,0.952260514191299  
"12445","PACSIN2",90.4093116562725,-0.0620518750037557,0.2108408685819  
74,-0.294306675081971,0.768523572435582,0.952260514191299  
"12446","SEPTIN6",108.848510175332,-0.0608364954786786,0.2067888319246  
79,-0.29419623348343,0.768607958607552,0.952260514191299  
"12447","CARD16",23.9848969475451,-0.108063982526606,0.367966242926717  
, -0.293679065957491,0.769003152227913,0.952372747778041  
"12448","NAA80",38.0430055228047,-0.0933942912873902,0.318294585129379  
, -0.293420924045653,0.769200433862425,0.952387525139701  
"12449","HAUS5",26.4567600434973,-0.0947787944044897,0.322961148919149  
, -0.293468098939098,0.769164379940858,0.952387525139701  
"12450","LINC01547",5.27588534988152,0.191868511238414,0.6536690525728  
32,0.293525462897811,0.769120539588667,0.952387525139701  
"12451","ALX1",5.7043204383019,0.306670704202583,1.04606108335541,0.29  
3167109533303,0.769394422907477,0.952551203045438

"12452", "THRAP3", 705.361960259579, -0.0450710535650699, 0.15384083950889  
9, -0.292971968359955, 0.769543578056243, 0.952631460747329  
"12453", "HSPA1B", 385.029872443757, 0.0910179756568453, 0.310725764203309  
, 0.292920594757285, 0.769582846622542, 0.952631460747329  
"12454", "AL020997.2", 10.1383309022224, 0.189284655576531, 0.646686681567  
165, 0.292699170976929, 0.769752103620068, 0.952687970879434  
"12455", "FNIP1", 341.615431566721, 0.068720492422766, 0.23472235441447, 0.  
292773530643017, 0.769695261645939, 0.952687970879434  
"12456", "TCEANC2", 28.1570302313321, 0.128727096522289, 0.441092327114019  
, 0.291837079471605, 0.770411193365977, 0.952738752164985  
"12457", "BX664615.2", 11.2135147386484, 0.199688785327111, 0.684218246143  
79, 0.291849547205944, 0.770401660299452, 0.952738752164985  
"12458", "ABL1", 333.135509560814, 0.0496804237002477, 0.169863173013551, 0.  
.292473187795004, 0.769924857148838, 0.952738752164985  
"12459", "DDX6", 400.093777750366, 0.0545926646670334, 0.186741889719714, 0.  
.29234289504606, 0.770024465025958, 0.952738752164985  
"12460", "DMAC2L", 86.5486547213194, -0.0736884983123861, 0.25222158862356  
2, -0.292157775686543, 0.770165993980289, 0.952738752164985  
"12461", "DET1", 38.0963671625716, 0.0736172190908599, 0.251958588528998, 0.  
.292179836062176, 0.770149127801137, 0.952738752164985  
"12462", "DNAJA3", 55.1624564666109, -0.070596572152758, 0.241337471044325  
, -0.292522217321951, 0.769887375408066, 0.952738752164985  
"12463", "ADCYAP1", 2.60479987420045, -0.386676992030021, 1.32389325176207  
, -0.29207565754668, 0.770228778057861, 0.952738752164985  
"12464", "PGRMC1", 914.758052399741, 0.064382990390015, 0.220504306457531,  
0.291980648470533, 0.770301419882388, 0.952738752164985  
"12465", "DKC1", 126.235923525796, -0.0628756996656437, 0.21528539288209, -  
0.292057435127892, 0.770242710357384, 0.952738752164985  
"12466", "AC009309.1", 3.16843135051987, -0.345595504745223, 1.18570880420  
472, -0.291467435781604, 0.77069384570661, 0.953011842737637  
"12467", "CIDEB", 26.0788002408102, 0.0918905142243995, 0.315531801187638,  
0.291224256567897, 0.770879812126752, 0.953016689602335  
"12468", "PHB", 569.591480822399, -0.0711014635777002, 0.244150531631618, -  
0.291219777825348, 0.770883237278723, 0.953016689602335  
"12469", "ZNF540", 10.0859900267662, 0.140457370613309, 0.482288242805651,  
0.291231172869188, 0.770874522842219, 0.953016689602335  
"12470", "NEURL2", 18.5749081860834, 0.130533375491285, 0.448470003903352,  
0.291063782092805, 0.771002538972877, 0.95303503040711  
"12471", "PTPN1", 137.90592498154, 0.0702895805282303, 0.241512833314939, 0.  
.291038697875615, 0.771021723270002, 0.95303503040711  
"12472", "MRPL19", 233.328462214461, -0.0605039920482889, 0.20811678958447  
8, -0.290721340498717, 0.771264448863772, 0.953258617642322  
"12473", "NDUFB8", 901.423474482301, -0.0823939920919151, 0.28374337936751  
1, -0.290382077902852, 0.77152395307266, 0.953426465978439  
"12474", "CCT8", 437.951908393298, -0.0784539892265808, 0.270131181461663,  
-0.290429223320577, 0.771487889699887, 0.953426465978439  
"12475", "ZNF19", 10.8209154964009, 0.154851763095524, 0.533456358895283, 0.  
.290280096044222, 0.77160196467143, 0.953446435704216  
"12476", "PTAFR", 3.9936802665191, -0.295746357500674, 1.02034788708718, -0.  
.289848551894345, 0.771932102360396, 0.953539153551667

"12477", "CD8A", 5.53424760571128, -0.198637198535504, 0.685282963548567, -0.289861574125395, 0.771922139555517, 0.953539153551667  
"12478", "FAM120A", 442.909694510266, 0.0488562019343163, 0.168594738483217, 0.28978485529047, 0.771980834525554, 0.953539153551667  
"12479", "TBC1D10C", 8.49439522633491, 0.191077984973901, 0.658721920864024, 0.290073821626082, 0.771759762511603, 0.953539153551667  
"12480", "ZNF41", 16.1431638499144, 0.111643618894171, 0.385273292288385, 0.28977772695078, 0.77198628844144, 0.953539153551667  
"12481", "POLD3", 115.225869445174, -0.0609230151087184, 0.210373686680657, -0.289594274217376, 0.772126647901978, 0.953582806156915  
"12482", "ALDH1A3", 285.150207618578, -0.115688087555136, 0.399517062034451, -0.289569829548758, 0.772145351050964, 0.953582806156915  
"12483", "DPH5", 97.9991478200949, 0.0739855290643664, 0.256351807479772, 0.288609352092063, 0.772880337989177, 0.953665103337418  
"12484", "MRPL55", 270.970379649347, -0.0676133053169067, 0.234327389557656, -0.288542049841214, 0.772931847391516, 0.953665103337418  
"12485", "SEPTIN10", 506.386953542647, -0.0418967454880958, 0.145240438699882, -0.288464740695732, 0.77299101674929, 0.953665103337418  
"12486", "NAIF1", 20.2758115510993, 0.101706656730683, 0.352423842930986, 0.288591872459094, 0.772893715832612, 0.953665103337418  
"12487", "TAF5", 21.4404663888431, 0.113896582287186, 0.393962740443557, 0.289104959923243, 0.772501058124908, 0.953665103337418  
"12488", "RRP8", 75.9946841327071, -0.0674403019155793, 0.233441317128892, -0.288896167760837, 0.772660836436461, 0.953665103337418  
"12489", "LT01", 38.0458547122422, 0.0850545841482775, 0.294968980590705, 0.288350944488966, 0.773078114259123, 0.953665103337418  
"12490", "SQOR", 242.867005319569, 0.0571752943428576, 0.197735203038, 0.289150811107064, 0.772465971773784, 0.953665103337418  
"12491", "AC007950.2", 5.16958630341232, -0.203833859923801, 0.704784513458074, -0.28921444218982, 0.772417280617151, 0.953665103337418  
"12492", "L3MBTL4", 24.0111870592941, 0.103401893310909, 0.3585775444394, 0.288366895569458, 0.77306590542518, 0.953665103337418  
"12493", "ELL", 53.5728878105279, 0.111952780320897, 0.388010425070145, 0.288530341164566, 0.772940808664044, 0.953665103337418  
"12494", "GEMIN7-AS1", 3.77689151666979, -0.222508867578836, 0.770660529199604, -0.288724878397406, 0.772791922908495, 0.953665103337418  
"12495", "ZNF845", 23.1338281673173, 0.10272007479213, 0.35622594460901, 0.288356523006414, 0.773073844498523, 0.953665103337418  
"12496", "MRPL40", 402.715257555606, -0.0857022838597735, 0.296918821763614, -0.288638771199232, 0.772857822553822, 0.953665103337418  
"12497", "LINC00339", 28.6622035084419, -0.0909027437981722, 0.316105587776137, -0.287570822261291, 0.773675282269656, 0.953958207169067  
"12498", "WDR3", 55.2570836548348, 0.0822786230215351, 0.28621175331482, 0.287474647943729, 0.77374891107589, 0.953958207169067  
"12499", "RFESD", 16.1334147216755, 0.127267629583236, 0.442361411947442, 0.287700568236629, 0.773575955014814, 0.953958207169067  
"12500", "GIMAP1", 5.38484144691201, -0.20727662956111, 0.720610480999309, -0.287640320292966, 0.773622077470828, 0.953958207169067  
"12501", "AC092747.4", 35.396343959344, 0.0858940027576965, 0.298294902035

041,0.28794995211687,0.773385049169166,0.953958207169067  
"12502","SNRNP35",155.899449820099,0.0699576508728908,0.24332403873773  
,0.28750817730876,0.773723241547721,0.953958207169067  
"12503","ARMC6",46.1488204856273,0.0956295991462116,0.332283315087105,  
0.287795368603275,0.773503382774987,0.953958207169067  
"12504","GCNA",4.78138855750587,-0.193961958812319,0.675091022938096,-  
0.287312306373395,0.77387320059994,0.954035139735131  
"12505","SDHC",375.184126130208,0.0591146589741615,0.205916991120833,0  
.28708004449945,0.774051031540314,0.954178060871167  
"12506","KDM8",5.4714198528981,0.178926470571756,0.624630422542638,0.2  
86451738683193,0.774532152305886,0.954618463883844  
"12507","LINC00266-1",3.42508569298344,0.229789050810908,0.80215210238  
4404,0.286465684161218,0.774521472713674,0.954618463883844  
"12508","AL162274.2",3.44844844221748,0.271954830581761,0.950596436670  
59,0.286088628245092,0.774810241070119,0.954884862975367  
"12509","SLC9A5",2.5236340067312,-0.286970850616127,1.00343469077409,-  
0.285988568319027,0.774886877218337,0.954902966849521  
"12510","LZTFL1",65.4850502429933,-0.063710309852115,0.222846129319219  
, -0.285893724278479,0.774959520531324,0.954916147800988  
"12511","SETD6",29.2735339607672,-0.0992479794540928,0.347295398510248  
, -0.285773954621412,0.775051257782784,0.954952852587452  
"12512","AC119800.1",2.93942003990772,-0.265579186859082,0.93054282610  
6345,-0.285402433298358,0.775335843526914,0.955117291096675  
"12513","GATM",5.99284059819631,-0.208036515148206,0.729039304331144,-  
0.285357063620964,0.77537059881828,0.955117291096675  
"12514","CRISPLD2",449.436195508696,-0.0933106721873795,0.326880960841  
098,-0.285457653903371,0.775293542572229,0.955117291096675  
"12515","DNAAF1",3.00697188280701,-0.252619428278918,0.886056543214639  
, -0.285105313214445,0.775563459558632,0.955278524098786  
"12516","WDR63",2.60278708239291,-0.291280539986821,1.02225987475439,-  
0.284937858934163,0.775691750460286,0.955280028330241  
"12517","ARHGEF11",76.0349378435256,-0.0695599663002453,0.245303214276  
549,-0.283567284290964,0.776742011678691,0.955280028330241  
"12518","Clorf229",2.79535774505577,0.294584744085955,1.03878099838116  
,0.283586958699703,0.77672693243214,0.955280028330241  
"12519","LINC00954",7.08273937676799,-0.171553193183174,0.603176671389  
669,-0.284416160837139,0.776091475615643,0.955280028330241  
"12520","DNAJC27-  
AS1",11.6167101184981,0.158589425198292,0.559594592937684,0.2834005674  
8181,0.776869793424488,0.955280028330241  
"12521","BABAM2",124.222741111096,0.0705324054293566,0.248765979839011  
,0.28352914443929,0.776771243812103,0.955280028330241  
"12522","CLSTN2",58.474946521206,-0.123908098029642,0.435771515617861,  
-0.284341893833878,0.776148383829298,0.955280028330241  
"12523","AC073475.1",2.98521262907753,-0.235334624244933,0.82748683289  
6018,-0.284396820456121,0.776106295359147,0.955280028330241  
"12524","KIAA0408",126.266657382877,0.103801568994046,0.36563350282003  
8,0.283895125018497,0.776490752535719,0.955280028330241  
"12525","ST7-  
OT4",9.22710967855565,0.164206564085782,0.576711505141894,0.2847291282

06625,0.775851672848271,0.955280028330241  
"12526","ZNF572",5.169308507489,0.213110782748313,0.751773567791492,0.28347735525522,0.776810937926576,0.955280028330241  
"12527","CBWD6",3.84069704872172,0.224591898549083,0.790755784569976,0.284021821821031,0.776393657593077,0.955280028330241  
"12528","POLL",71.8163701526216,-0.0662955416541673,0.232936417579353,-0.28460788717841,0.775944567966905,0.955280028330241  
"12529","B3GAT3",173.393671351024,-0.0723365103684048,0.254728711694076,-0.283974703469154,0.776429766649426,0.955280028330241  
"12530","SSPN",1961.43558093489,-0.0709148873927089,0.249475361562308,-0.284256076225778,0.776214144365108,0.955280028330241  
"12531","ARMH4",71.2367577947782,0.0668107028851119,0.23520041267032,0.284058612510856,0.776365463456202,0.955280028330241  
"12532","LPCAT4",48.569752944001,-0.092192097768438,0.324826946565747,-0.283819118897446,0.776549002011415,0.955280028330241  
"12533","EIF2AK4",268.396191048411,-0.0545403567225143,0.191636522619952,-0.284603143371982,0.775948202746064,0.955280028330241  
"12534","OAZ1",4000.53497822186,-0.0580727469744628,0.204968970439485,-0.283324577617509,0.7769280386102,0.955280028330241  
"12535","ASXL1",284.913407671824,-0.0743737000863868,0.26126384984516,-0.284668928098798,0.775897797890706,0.955280028330241  
"12536","UQCR10",1126.47874187001,0.0766221412379899,0.270362657108305,0.283405045865102,0.776866360844433,0.955280028330241  
"12537","TBC1D8B",99.4523370962508,0.0598960866771232,0.210469143695809,0.284583695383353,0.775963104152385,0.955280028330241  
"12538","BIRC2",340.614507855606,0.0402820849460041,0.142251392155465,0.283175330206823,0.777042438347383,0.955319380920977  
"12539","ALKBH2",93.8934837023792,-0.0737962281831476,0.260652499795085,-0.283121121958022,0.777083990747203,0.955319380920977  
"12540","SOGA3",3.68127248690676,-0.202639465097368,0.716032373546221,-0.283003216871013,0.777174371063568,0.955354300633565  
"12541","SLC10A6",3.12729529836516,-0.253107877189624,0.895402835785277,-0.282674866634352,0.777426084306535,0.955380314134227  
"12542","SPATA24",6.36167484025376,-0.168411397364729,0.596294731135774,-0.282429792803891,0.777613973097335,0.955380314134227  
"12543","FKBP5",471.297803099915,0.193758061544907,0.686481526487484,0.28224803446104,0.777753328710374,0.955380314134227  
"12544","TDRP",9.07128693098182,-0.151152207981485,0.535506138116154,-0.28226045832681,0.777743803002848,0.955380314134227  
"12545","AC011029.1",2.9806866557547,-0.323750913260649,1.144957373579,-0.282762416078988,0.777358966629845,0.955380314134227  
"12546","AC234917.3",2.358096565011,0.274862856924747,0.972604104260972,0.282605076125604,0.777479588711867,0.955380314134227  
"12547","PXMP2",87.7958211620037,0.0755308696566848,0.267519774781786,0.282337519603157,0.777684718823855,0.955380314134227  
"12548","MBOAT7",93.0306965839163,-0.0602940776619483,0.213490921412474,-0.282419867144877,0.777621582996937,0.955380314134227  
"12549","TCN2",108.053588196255,0.0965305717382738,0.341329941485129,0.282807219660451,0.777324619684056,0.955380314134227  
"12550","LINC02454",2.48700788337251,-0.282032647883734,1.000011932176

74,-0.282029282660488,0.777921056990612,0.955434076448911  
"12551","L3MBTL2",53.7726394146015,0.0817365446625414,0.28976472637871  
8,0.28207900141618,0.777882934149079,0.955434076448911  
"12552","MAGI3",136.904082189204,0.0744120775418522,0.264251578004573,  
0.281595584419043,0.778253626374725,0.955538004824084  
"12553","CLUAP1",164.807952788001,0.0502738636229015,0.178524365293764  
,0.281607855264884,0.778244216260661,0.955538004824084  
"12554","PRR14",77.1292924529767,-0.0607880926291825,0.215819413862131  
, -0.281661837280379,0.77820281958835,0.955538004824084  
"12555","HCCS",49.2084312493024,-0.0835574707292906,0.296525394787663,  
-0.281788582691627,0.778105626020158,0.955538004824084  
"12556","MCPH1-  
AS1",3.90394160767026,-0.217959332364762,0.774741108901061,-0.28133182  
7962413,0.77845590051357,0.955710234662049  
"12557","IFT88",68.7801373631773,-0.0618585413760832,0.219967877237144  
, -0.281216249177122,0.778544542313212,0.955742941766199  
"12558","MMGT1",115.512055430771,-0.0560266373900607,0.199507907351318  
, -0.280824144435549,0.778845283926338,0.956035997111364  
"12559","ABRAXAS2",74.0373656475763,0.059029190402817,0.21027974303236  
8,0.280717436456685,0.778927133939329,0.956054379226567  
"12560","SIX1",109.707733100932,0.0625973699398314,0.223049889607679,0  
.280642909305777,0.778984301205688,0.956054379226567  
"12561","CT70",2.42303012825439,0.312556442841718,1.11428312846126,0.2  
80500022712661,0.779093908040423,0.956112777043478  
"12562","ARHGEF28",3.72779939506781,0.274769819296062,0.98004970413888  
2,0.280363147027821,0.779198908089095,0.956165512513405  
"12563","C1orf56",127.796879208348,-0.094186423081598,0.33610994373841  
8,-0.28022504194312,0.779304855318637,0.956219401793902  
"12564","AKR7A3",2.9229114501048,0.284306772310224,1.02229766882006,0.  
278105664310446,0.780931247707671,0.956311978345547  
"12565","MAC01",178.189316280932,-0.0438447755142601,0.157571589124547  
, -0.278253051567593,0.780818112877576,0.956311978345547  
"12566","LDLRAP1",41.6298273076439,0.071570360641297,0.255603933667642  
,0.280004926427927,0.779473725273511,0.956311978345547  
"12567","SH3GLB1",725.990015488421,-0.0387347763738776,0.1390515335192  
98,-0.278564179721914,0.780579305359424,0.956311978345547  
"12568","PRCC",118.767019887989,0.0658005187802978,0.235835739517739,0  
.279009953770592,0.780237185982408,0.956311978345547  
"12569","MOGS",75.0938670704684,-0.0699474719512967,0.249939841539418,  
-0.279857230925968,0.779587041307644,0.956311978345547  
"12570","AC069148.1",4.3896834293638,0.21936577697873,0.78875848445664  
1,0.278115267602917,0.780923876054904,0.956311978345547  
"12571","CMTM6",351.01039118532,-0.0447042965544201,0.160475432234368,  
-0.278574084094887,0.78057170356262,0.956311978345547  
"12572","CEP19",28.638749310918,-0.0927063446070875,0.333176805206517,  
-0.278249695532149,0.780820688927231,0.956311978345547  
"12573","ERCC8",23.742362524762,-0.0992716217589247,0.355390406392665,  
-0.279331180508123,0.779990679630424,0.956311978345547  
"12574","AC010245.2",6.14723404418509,0.173722008064313,0.623995233411  
981,0.278402780602038,0.780703185244172,0.956311978345547

"12575","C6orf226",115.348714070561,0.0832342285916373,0.2991909964055  
97,0.278197638269841,0.780860647720457,0.956311978345547  
"12576","MED23",74.6444612149375,-0.0671936157390915,0.240088679703654  
, -0.279869987298151,0.779577254084705,0.956311978345547  
"12577","AL355304.1",5.97120072372039,0.204470672687633,0.734146604392  
591,0.278514770025811,0.780617228565038,0.956311978345547  
"12578","YKT6",80.4873825468343,0.0636520014041387,0.227572471277089,0  
.279699917335946,0.779707741753622,0.956311978345547  
"12579","CN0T7",210.686487120917,0.0472767925102545,0.169128971205651,  
0.279531012181045,0.779837341857569,0.956311978345547  
"12580","CCDC88B",5.66293279748111,0.257443376765846,0.924306433489792  
,0.278526003323214,0.780608606676103,0.956311978345547  
"12581","NECAP1",120.103639938636,-0.0572240449261987,0.20524369237675  
4,-0.278810248751303,0.780390448859468,0.956311978345547  
"12582","DNM1L",176.772223301416,-0.0626719754402446,0.224433554954504  
, -0.279245122027092,0.780056717924596,0.956311978345547  
"12583","NPRL3",121.73318748204,-0.0685911976383785,0.246427631689826,  
-0.278342153304923,0.780749720409534,0.956311978345547  
"12584","GOT2",50.4017721686388,-0.0780626764504637,0.280302681422778,  
-0.278494219371104,0.780633001871868,0.956311978345547  
"12585","ILF3",290.299980268844,0.0518675571651367,0.18632133663049,0.  
278376905743221,0.780723045687681,0.956311978345547  
"12586","LINC01270",3.11880652276449,0.233383876308672,0.8381665526286  
06,0.278445704587886,0.780670238929842,0.956311978345547  
"12587","SLC25A1",174.022249050557,-0.0496952316784438,0.1776392653933  
66,-0.279753643252229,0.779666519402638,0.956311978345547  
"12588","LINC00894",11.1561336123686,0.157874257185985,0.5649058642696  
01,0.279470027081609,0.779884136931512,0.956311978345547  
"12589","CDKL1",32.8490402295186,-0.0937026466234609,0.337161773435649  
, -0.277915985755559,0.781076852268492,0.956366856109079  
"12590","LINC01273",3.51193226969717,0.241512471156479,0.8691074034530  
25,0.277885644739571,0.781100143912637,0.956366856109079  
"12591","FN3KRP",130.122126853136,0.0856660780206322,0.308534491922532  
,0.277654785002585,0.781277372583774,0.956507878514723  
"12592","CTPT",48.3918323671582,0.0869750340412406,0.313533844161317,0  
.277402378278789,0.781471155657709,0.956580532713614  
"12593","ATP1B1",78.6602558595509,0.121335178779122,0.437566743574522,  
0.277295248235559,0.781553407921998,0.956580532713614  
"12594","ABI3BP",2581.15090477904,-0.0698586899798894,0.25221573404559  
1,-0.276979904700401,0.781795536441559,0.956580532713614  
"12595","ZNF92",69.718870012025,0.0694100307799945,0.250859856947598,0  
.276688473096329,0.782019323597597,0.956580532713614  
"12596","BMT2",43.5354103086013,0.0776217648545629,0.28051813948415,0.  
276708540122585,0.782003913767885,0.956580532713614  
"12597","SH2D4A",113.182130876939,-0.0712062988992299,0.25707407910418  
2,-0.276987470488508,0.781789726995721,0.956580532713614  
"12598","TMC03",229.238189929785,-0.0468072202843881,0.168769429404429  
, -0.277344187567418,0.781515832996985,0.956580532713614  
"12599","AL359220.1",2.71407990538355,-0.253477442463284,0.91570109979  
5704,-0.276812425495433,0.781924139693311,0.956580532713614



"12600", "SMAD3", 402.913342138805, 0.0594688071539267, 0.21472510483224, 0.276953210479922, 0.781816033891614, 0.956580532713614  
"12601", "AP000915.1", 6.67210974286608, -0.264794277025431, 0.956372433244349, -0.276873598423531, 0.781877165782386, 0.956580532713614  
"12602", "AC120049.1", 10.2684802464454, -0.137310012982578, 0.495449799700715, -0.277142130374302, 0.781670972937673, 0.956580532713614  
"12603", "TMEM150A", 66.2404122415713, 0.0716323643454685, 0.259212740900991, 0.27634584664505, 0.78228244579768, 0.956598754717693  
"12604", "NUP35", 49.9603155867879, -0.0806971564475154, 0.291950579938377, -0.276406905800798, 0.782235553198774, 0.956598754717693  
"12605", "AKT2", 256.952094856753, 0.0531297350455034, 0.192161637008382, 0.276484608856584, 0.782175879456045, 0.956598754717693  
"12606", "KCNJ15", 41.9115248827067, -0.133856740182705, 0.484108282899012, -0.276501652442555, 0.782162790636902, 0.956598754717693  
"12607", "ADCK5", 23.7590064171565, -0.0900916837695005, 0.326217246655516, -0.27617081773925, 0.782416869994724, 0.956645563482825  
"12608", "AC087239.1", 23.9726467679111, -0.11185020460232, 0.405151759192722, -0.276069897426054, 0.782494380900659, 0.956645563482825  
"12609", "COQ5", 111.731618828337, -0.0793631956657398, 0.287496597624116, -0.276049164830473, 0.782510304644879, 0.956645563482825  
"12610", "ZNF527", 20.4163688504099, 0.101106803452399, 0.366365111678574, 0.27597279388629, 0.782568962407942, 0.956645563482825  
"12611", "PSTPIP2", 23.7028180120845, 0.118588024201401, 0.429907478393716, 0.275845455502396, 0.782666769169127, 0.956689259118396  
"12612", "GHITM", 590.218288562037, -0.0517107742704917, 0.187610959111934, -0.275627684626032, 0.782834043773864, 0.95672940801061  
"12613", "AL049840.2", 32.6335691312709, -0.0883832189224931, 0.321010801224716, -0.275327866181744, 0.783064357348249, 0.95672940801061  
"12614", "AKAP13", 1137.23428460183, -0.0724720596765922, 0.262963271596054, -0.275597649955918, 0.782857114853307, 0.95672940801061  
"12615", "ZNF764", 18.4725010768664, 0.106757032080042, 0.387612670753294, 0.275421935698254, 0.782992093279929, 0.95672940801061  
"12616", "BMP7", 27.9820274092168, -0.155103967117261, 0.563363152700681, -0.275317912386914, 0.783072003948743, 0.95672940801061  
"12617", "GP1BB", 59.0160486500125, 0.121566322346855, 0.441262299135732, 0.27549673422125, 0.78293463449751, 0.95672940801061  
"12618", "AL137796.1", 7.4542605727099, 0.176614168007237, 0.643336038103375, 0.274528640627556, 0.783678396721573, 0.956761511777811  
"12619", "DOK1", 54.853218698278, -0.0761572665754295, 0.277788608300078, -0.274155470382578, 0.783965146962626, 0.956761511777811  
"12620", "AGAP1", 223.187788450833, 0.0903234984956499, 0.330352704770917, 0.273415344240286, 0.784533958997055, 0.956761511777811  
"12621", "AC024230.1", 2.98651550943024, 0.250841245867858, 0.914855676123735, 0.274186685850471, 0.783941159351475, 0.956761511777811  
"12622", "RAD1", 109.719518514223, 0.0506021629107179, 0.185087900892274, 0.273395303889526, 0.784549362288099, 0.956761511777811  
"12623", "DTWD2", 16.7809957345058, -0.0959569156544141, 0.350842746720856, -0.27350406001342, 0.784465771839474, 0.956761511777811  
"12624", "LEAP2", 18.1742380842351, -0.141143548924347, 0.513032025438105, -0.275116448732059, 0.78322677476064, 0.956761511777811

"12625", "HARS2", 38.7621568364506, 0.0850630452969383, 0.310824210723649, 0.273669303619875, 0.7843387696155, 0.956761511777811  
"12626", "AC091729.3", 22.2801829737182, -0.102023466562857, 0.373350166603037, -0.27326482131005, 0.784649655068506, 0.956761511777811  
"12627", "MRM2", 84.3898416964058, -0.0698168527996504, 0.25433471887878, -0.27450775539979, 0.783694444503308, 0.956761511777811  
"12628", "WIPI2", 334.6741588577, -0.0424822905753952, 0.155395351577206, -0.273381990800983, 0.784559594958923, 0.956761511777811  
"12629", "ZNF250", 22.5749892991896, -0.101685878537327, 0.372077830513665, -0.27329195721483, 0.784628797312727, 0.956761511777811  
"12630", "ISCA1", 298.720712297843, -0.0627215222528342, 0.228083745326191, -0.274993389656654, 0.783321316892072, 0.956761511777811  
"12631", "SLC25A16", 60.0438729311895, -0.0671292510662945, 0.244506072458767, -0.274550445276221, 0.783661642573804, 0.956761511777811  
"12632", "MCMBP", 158.814607226728, 0.0439016647689405, 0.160209562872186, 0.274026493686678, 0.784064261631331, 0.956761511777811  
"12633", "ALDH3B1", 14.676949892086, -0.122501149772148, 0.445803329457861, -0.274787426825907, 0.783479558336622, 0.956761511777811  
"12634", "BACE1", 282.937892341224, 0.0429429013204058, 0.15678923514426, 0.273889347574752, 0.784169658090719, 0.956761511777811  
"12635", "ZNF385A", 281.395067147389, -0.0983881233600424, 0.358354690510349, -0.274555143173718, 0.783658032839764, 0.956761511777811  
"12636", "AL096870.8", 54.6172830769886, 0.0916998717569262, 0.335080173651655, 0.27366546566332, 0.784341719310592, 0.956761511777811  
"12637", "ZFYVE21", 371.654779589983, 0.0648414675247725, 0.236755866841727, 0.273874807791435, 0.78418083211161, 0.956761511777811  
"12638", "IQCK", 102.642309860337, -0.0675333929091058, 0.245686042214721, -0.274876799269223, 0.783410892300581, 0.956761511777811  
"12639", "ECH1", 618.67175515322, -0.0734149855163273, 0.268440293073376, -0.273487205202313, 0.784478726360725, 0.956761511777811  
"12640", "ZNF586", 15.0356635341209, 0.13097755058434, 0.476843206780569, 0.274676347952279, 0.783564904061963, 0.956761511777811  
"12641", "ZNF334", 5.14206934926331, 0.252399575525072, 0.919997297372986, 0.274348170636792, 0.783817069207239, 0.956761511777811  
"12642", "RUNX1", 295.256269525392, 0.0801472717208092, 0.293295657957088, 0.273264433162988, 0.784649953415186, 0.956761511777811  
"12643", "AL359232.1", 7.14246272329111, -0.149136812731023, 0.54614373295083, -0.273072460110882, 0.784797516112851, 0.956865752659938  
"12644", "AL353807.5", 61.2708161606812, 0.0824086996659422, 0.302137509495644, 0.272752296805208, 0.785043631198923, 0.95693876126296  
"12645", "TTC19", 151.224646716105, -0.0452328042034072, 0.165805365718693, -0.272806636910349, 0.78500185750258, 0.95693876126296  
"12646", "CRLF3", 29.4663455684349, 0.0845760574470934, 0.309900368546698, 0.272913703987251, 0.784919552010691, 0.95693876126296  
"12647", "NGDN", 108.578327917051, -0.072640714463126, 0.266832170145054, -0.272233720632852, 0.785442315286585, 0.957121999220768  
"12648", "GPR65", 7.70611722161425, -0.175851993101996, 0.645517735631768, -0.272420079875714, 0.78529903483638, 0.957121999220768  
"12649", "FOXK2", 79.1032385641522, -0.0656623027598466, 0.241127273131729, -0.272313877675608, 0.785380686450385, 0.957121999220768

"12650","PHETA2",102.211334041043,0.0686613396619637,0.25213776297779,  
0.272316763863777,0.785378467426319,0.957121999220768  
"12651","ZNF14",21.891405358087,-0.105979518015841,0.389667115270193,-  
0.271974497879698,0.78564162820907,0.95728920234312  
"12652","CCDC84",68.1370370084453,0.083466877392933,0.307038429846064,  
0.271845050258952,0.785741164022205,0.957334812156362  
"12653","AGRN",13.0082523666877,-0.1391695229997,0.512234653203433,-0.  
27169095673117,0.785859655313169,0.957403507994349  
"12654","OARD1",147.058049142478,-0.0597473575143224,0.220073080124312  
, -0.271488714024328,0.786015178778333,0.957517305268532  
"12655","IFT46",52.9511894497127,-0.0606161667751012,0.223613832121079  
, -0.271075211225215,0.786333186598085,0.957753324226413  
"12656","PIGU",66.3033810844511,0.0630320177590351,0.232464832838349,0.  
.271146465422003,0.786278385412771,0.957753324226413  
"12657","SPTLC1",304.31287048504,-0.04120309501352,0.152123287301745,-  
0.27085330421365,0.78650386076092,0.957885518972078  
"12658","AC114980.1",19.1004596156176,0.117325890078672,0.433552791068  
501,0.270615003514381,0.786687155136957,0.957957381818169  
"12659","CLASRP",76.8716987356428,-0.0570359734625406,0.21076350333661  
6, -0.27061598692183,0.786686398702566,0.957957381818169  
"12660","AC105114.2",4.06909318110546,0.216235124068125,0.799692614096  
596,0.270397800675455,0.786854231913623,0.958085148890087  
"12661","CDR2L",53.0033523465463,0.0636273271049674,0.235386203935157,  
0.270310349719966,0.786921503712418,0.958091381385903  
"12662","EHMT1",160.227733032408,-0.0486294526499461,0.180193406802725  
, -0.269873651388286,0.787257458448149,0.958126694783852  
"12663","FAR1",147.257089991304,-0.0482650756448285,0.178840714027523,  
-0.269877448808444,0.787254536898517,0.958126694783852  
"12664","FERMT3",26.4454981928573,-0.090356693723892,0.334817270128501  
, -0.269868676992718,0.787261285509716,0.958126694783852  
"12665","NLGN2",80.8489079715445,-0.0663843670201347,0.245919276766131  
, -0.269943730695281,0.787203543333747,0.958126694783852  
"12666","FLII",255.306116056316,0.0560410870990179,0.207495528798193,0.  
.270083347933355,0.787096132649769,0.958126694783852  
"12667","MARCKSL1",175.716461069836,-0.0939251494754447,0.348200711343  
182, -0.269744277985903,0.787356993814647,0.958167526616625  
"12668","TVP23C",17.2240632930597,-0.103425362193219,0.383777372471808  
, -0.269493121824989,0.787550234487949,0.958327033835786  
"12669","KIF20B",58.0481050775037,-0.0719497922053918,0.26714992054583  
8, -0.269323651896975,0.78768063279961,0.958334408414049  
"12670","TARSL2",52.7353803678273,-0.0840002697864776,0.31182244121680  
9, -0.269384940540801,0.787633473682759,0.958334408414049  
"12671","MON1B",116.565087748488,-0.0626031829083625,0.232540056747511  
, -0.269214619554067,0.787764530673765,0.958360842896069  
"12672","EHD3",3.24802581255564,0.209213012770461,0.778827209693663,0.  
268625710769338,0.788217724956322,0.958490948457015  
"12673","SLC04C1",5.28636593481198,0.233024916615305,0.867660567800085  
, 0.268566908838706,0.788262979874201,0.958490948457015  
"12674","LINC00863",40.3085995063646,-0.0978456183714421,0.36452022122  
3154, -0.268423019285787,0.788373722617704,0.958490948457015

"12675", "LINC02823", 6.30801746465079, -0.164816061196606, 0.614167952266195, -0.26835666137977, 0.788424795567758, 0.958490948457015  
"12676", "AL354696.2", 2.98638543488092, -0.23354473224473, 0.869888813266603, -0.268476532498129, 0.788332536362496, 0.958490948457015  
"12677", "CLN5", 258.833665571, 0.0542559817676723, 0.202162074102835, 0.268378636341421, 0.788407882243172, 0.958490948457015  
"12678", "ADCK1", 10.4703348752063, 0.12222535499092, 0.455472497982235, 0.268348485435201, 0.788431088318842, 0.958490948457015  
"12679", "CCP110", 86.2977032317351, 0.0691538586182908, 0.257497347421719, 0.268561440771013, 0.788267188223953, 0.958490948457015  
"12680", "KIAA0895L", 13.3005040827615, -0.128778139477586, 0.479162092824447, -0.268756943435354, 0.788116728749859, 0.958490948457015  
"12681", "AL139317.3", 2.71641010191077, 0.234332227273329, 0.873521663581471, 0.268261494869582, 0.788498042902575, 0.958496753516536  
"12682", "METTL17", 80.6292539644123, -0.063081787610444, 0.235283043564534, -0.268110215911678, 0.788614482464397, 0.958562706764602  
"12683", "CDC37L1-DT", 6.56007141266493, 0.176848591720077, 0.659979595318835, 0.267960696019158, 0.788729572712646, 0.958627009647989  
"12684", "MAEA", 163.270908570085, -0.0541694328728591, 0.202322599345895, -0.267737924720164, 0.78890105546618, 0.95875983680315  
"12685", "AP3M1", 71.0863005462493, -0.0629040187295672, 0.235038432652049, -0.267632905903054, 0.788981899391726, 0.958782497368818  
"12686", "ATP7B", 7.45523332068417, 0.15928570181448, 0.595401893026331, 0.267526361068246, 0.789063920374127, 0.958801504458003  
"12687", "CAPN15", 54.4679341256533, 0.0788602785662895, 0.294858794261699, 0.267450997226482, 0.789121938829626, 0.958801504458003  
"12688", "KIAA1217", 122.273380255809, 0.101585357200397, 0.380207488620568, 0.267183998844839, 0.789327495531897, 0.958975673362563  
"12689", "YTHDF1", 98.0440286528002, 0.0522974683709564, 0.19581949762524, 0.267069770912412, 0.789415441807192, 0.959006937935052  
"12690", "ACSL5", 79.3391469210548, -0.0823692012917033, 0.308807443497303, -0.266733211994039, 0.789674580565709, 0.959246151254564  
"12691", "SDF4", 841.066554455777, 0.0485691639335599, 0.18392052146739, 0.264076915104721, 0.791720651744512, 0.959344006355789  
"12692", "FAAH", 9.52931129667891, 0.147002749361489, 0.553612983433942, 0.265533420928213, 0.790598567405938, 0.959344006355789  
"12693", "QSOX1", 169.431236439323, -0.0622789769982819, 0.236040216923259, -0.263849007639787, 0.791896269556993, 0.959344006355789  
"12694", "LMO1", 229.664791366064, 0.0597916047157173, 0.226403971032822, 0.264092561817519, 0.791708595302513, 0.959344006355789  
"12695", "LPGAT1", 137.101952271848, -0.0532245385772323, 0.200769873745276, -0.265102216703887, 0.790930719734243, 0.959344006355789  
"12696", "EPRS", 399.210190448083, -0.0470123029691825, 0.176768760776008, -0.265953683008244, 0.790274880295862, 0.959344006355789  
"12697", "LINC01376", 6.26574780033539, 0.165505895100306, 0.622898851593576, 0.26570268138541, 0.79046819814834, 0.959344006355789  
"12698", "SLC35F6", 334.880785712676, 0.0545243206564648, 0.205779023417742, 0.26496539710842, 0.791036118447081, 0.959344006355789  
"12699", "MKRN2", 84.7783227113906, 0.0576536501053839, 0.21739169999741, 0

.265206307812445,0.790850535908941,0.959344006355789  
"12700","LINC02158",4.22988649116087,0.249050483959813,0.9475657076117  
16,0.262831888025507,0.792680156273349,0.959344006355789  
"12701","USP19",68.5355034133713,-0.0594723729613436,0.224012984415189  
, -0.26548627579157,0.79063488098553,0.959344006355789  
"12702","AC108865.2",2.54639705172723,0.257367603607795,0.972269981435  
853,0.264707960259879,0.791234444786583,0.959344006355789  
"12703","AC008443.1",30.2388512443855,-0.0805652523638868,0.3050137514  
68385,-0.264136459343333,0.791674770701821,0.959344006355789  
"12704","RMND1",80.2187830825229,0.0685938591138984,0.259289039070957,  
0.264545926660352,0.791359280509332,0.959344006355789  
"12705","TCTE3",9.54752170374877,-0.132361045674222,0.496675479634506,  
-0.266494020948294,0.789858763564516,0.959344006355789  
"12706","AC092428.1",6.46744571925879,-0.17364894707689,0.653876747927  
466,-0.265568316394931,0.790571689437263,0.959344006355789  
"12707","MDFIC",243.720392216616,-0.0712848638360011,0.270309615438093  
, -0.263715605234645,0.791999069855516,0.959344006355789  
"12708","C5",17.3285067121623,0.0990005790957229,0.374346400678593,0.2  
64462484255921,0.791423569219568,0.959344006355789  
"12709","LINC01503",24.238208799496,0.116666962019302,0.44312145939291  
6,0.263284387488563,0.792331392291374,0.959344006355789  
"12710","ALDH18A1",79.283430840251,0.0688638063763631,0.26193700006899  
6,0.262902172500349,0.792625981788288,0.959344006355789  
"12711","DNHD1",11.8963728356518,0.159425712634452,0.603319177459372,0  
.264247712638287,0.791589047848559,0.959344006355789  
"12712","KDM4D",6.44178664006795,0.162400107300213,0.617677311759426,0  
.262920628956928,0.792611755924457,0.959344006355789  
"12713","PYROXD1",93.8875853917886,-0.0649766694263085,0.2440342849622  
36,-0.26626041269719,0.790038659006862,0.959344006355789  
"12714","TSPAN11",9.76740157371558,0.19523269193935,0.741802259784751,  
0.263186973838554,0.792406470359451,0.959344006355789  
"12715","C12orf45",153.296767504008,0.0585260101775093,0.2209067987266  
07,0.264935305363511,0.791059300077706,0.959344006355789  
"12716","NUAK1",209.884312074893,0.123244211846482,0.465126811764993,0  
.264969055167587,0.791033300418498,0.959344006355789  
"12717","C12orf49",100.889110174236,0.0537946584914043,0.2022339765505  
04,0.266002080406949,0.790237606796659,0.959344006355789  
"12718","HIP1R",4.58471618081087,0.216118678262357,0.820072204800383,0  
.263536158154468,0.792137358024622,0.959344006355789  
"12719","RAB2B",95.206280665113,-0.0521061373109879,0.198037474846926,  
-0.263112511161151,0.792463861088707,0.959344006355789  
"12720","RBM25",850.128073705329,0.0646920405119171,0.245131315276651,  
0.263907695509678,0.791851045652176,0.959344006355789  
"12721","TDP1",20.0013881329019,-0.0939436474192741,0.354092490653027,  
-0.265308217200598,0.790772034858483,0.959344006355789  
"12722","CMTM2",2.5470689668936,0.321325243159455,1.21703729442986,0.2  
64022511577993,0.791762572308885,0.959344006355789  
"12723","AC092376.3",6.40697365867975,-0.180258286042708,0.68540537897  
994,-0.262995143561579,0.79255432227472,0.959344006355789  
"12724","DNAH9",4.47552358716506,0.210350913731643,0.795955880801364,0

.264274589591402,0.791568339005143,0.959344006355789  
"12725","AC005899.8",3.44386857918642,-0.236145501320106,0.89515773502  
5189,-0.263803229397846,0.791931546001554,0.959344006355789  
"12726","FMNL1",171.002285418134,0.0626514384335402,0.238245352797052,  
0.262970243482186,0.792573514393043,0.959344006355789  
"12727","TMED1",285.658566047302,0.0624857580439335,0.235423017584107,  
0.265419068556498,0.790686648198422,0.959344006355789  
"12728","LIPE-  
AS1",26.8420285655712,0.122421722106924,0.464651402767978,0.2634700366  
28847,0.792188315223987,0.959344006355789  
"12729","SULT2B1",7.28507104872048,-0.165587643019887,0.62344942538521  
8,-0.265599158933499,0.790547933413133,0.959344006355789  
"12730","SLC6A16",2.73291797860072,-0.242580993157058,0.92070001434107  
6,-0.263474518712446,0.792184861034444,0.959344006355789  
"12731","LENG1",101.744655877089,-0.0707393303710365,0.268595497705483  
, -0.263367520957491,0.792267321682195,0.959344006355789  
"12732","AL117335.1",9.52410002293541,-0.139949802788416,0.52633551516  
3933,-0.265894659882161,0.79032033790159,0.959344006355789  
"12733","LBP",3.32749686971106,-0.250613298697708,0.951909681564726,-0  
.26327424077225,0.792339212418304,0.959344006355789  
"12734","SLPI",341.947970538865,0.112135427359525,0.423920083525479,0.  
264520204909767,0.791379097837919,0.959344006355789  
"12735","APOBEC3D",31.9202936122626,0.0888623801065398,0.3371629180454  
73,0.263559173771758,0.79211962102274,0.959344006355789  
"12736","TENM1",67.1331083776967,-0.150422216571926,0.567829001973431,  
-0.264907597268102,0.791080645591336,0.959344006355789  
"12737","ENOX2",86.5543517342145,-0.0785069501750299,0.297458825925664  
, -0.26392543549758,0.791837375647872,0.959344006355789  
"12738","EFCAB2",70.7054815858525,-0.0686644650229407,0.26180230512128  
5,-0.26227601392253,0.793108653035556,0.959711899406789  
"12739","SLC41A2",124.892278023766,0.0580658606230775,0.22133539502472  
2,0.262343312133117,0.793056772736946,0.959711899406789  
"12740","ADPRHL2",126.186016346415,-0.0653696455257327,0.2512267934628  
02,-0.260201726992195,0.794708172186127,0.959788475572578  
"12741","RPF1",124.718685530906,-0.0519461180967134,0.200647167509604,  
-0.258892855261597,0.79571791097686,0.959788475572578  
"12742","GLMN",31.9430469957456,-0.083843755985981,0.322631215782094,-  
0.259874903247457,0.794960270639501,0.959788475572578  
"12743","NBPF20",20.3438498430831,0.128219213027831,0.490204385109594,  
0.261562762232666,0.793658556148279,0.959788475572578  
"12744","MCL1",3030.43853198231,-0.0718458107878499,0.275575953657854,  
-0.260711465692871,0.794315023427558,0.959788475572578  
"12745","CDC73",211.526261736127,0.0377132678882455,0.145416621230792,  
0.259346335852423,0.795368031190836,0.959788475572578  
"12746","SH3YL1",147.820310156105,0.0516362680702697,0.197078603733072  
,0.262008493525797,0.793314893992036,0.959788475572578  
"12747","RDH14",283.472674520105,-0.0535770118774245,0.206072462502737  
, -0.259991127522499,0.794870617538404,0.959788475572578  
"12748","SF3B6",833.359808542205,-0.0620751876028972,0.240029126778481  
, -0.258615229060035,0.795932131812976,0.959788475572578

"12749", "YPEL5", 361.80290186664, 0.0580152825298335, 0.224000723412188, 0.258995960575888, 0.795638357180351, 0.959788475572578  
"12750", "PRKAR2A", 235.033695057044, -0.0614561080771977, 0.23582726912792, -0.260597972000693, 0.794402553766627, 0.959788475572578  
"12751", "ZBTB11-AS1", 11.7774618395098, -0.122780990926032, 0.470971355318712, -0.260697364159111, 0.794325898886962, 0.959788475572578  
"12752", "C4orf33", 39.2511614032677, 0.077007374189659, 0.297134577937282, 0.259166653454629, 0.795506658973224, 0.959788475572578  
"12753", "LRP2BP", 3.90687359327153, 0.188607330068519, 0.723638727255139, 0.260637418873272, 0.794372130653363, 0.959788475572578  
"12754", "MCCC2", 52.1531853658415, 0.0640614501841537, 0.247261598835994, 0.259083701172073, 0.795570660136017, 0.959788475572578  
"12755", "MSX2", 19.6307311969623, -0.154363026756087, 0.595925769687346, -0.259030628658791, 0.795611608526025, 0.959788475572578  
"12756", "BPHL", 108.948584982016, 0.0612445853129224, 0.236866834930539, 0.258561251645392, 0.795973783439496, 0.959788475572578  
"12757", "C6orf52", 3.79797203401723, -0.225420737998957, 0.868553998347817, -0.259535663214673, 0.79522196915682, 0.959788475572578  
"12758", "AL137003.2", 3.20917454457971, 0.239183102114729, 0.915205624356587, 0.261343566679762, 0.793827572257955, 0.959788475572578  
"12759", "RARS2", 232.485814441208, -0.0573521914941602, 0.218984413731184, -0.261900792467191, 0.793397928638065, 0.959788475572578  
"12760", "RFPL4B", 16.1053743587412, 0.31204037281975, 1.19874849344503, 0.260305121988508, 0.794628421982593, 0.959788475572578  
"12761", "COX19", 110.967297844167, 0.0512039582011472, 0.196608693078307, 0.260435881035806, 0.794527568525476, 0.959788475572578  
"12762", "VPS37D", 28.7158896995286, -0.102024354190218, 0.393235010917366, -0.25944880633138, 0.795288976504593, 0.959788475572578  
"12763", "TMEM65", 129.02409614105, -0.0607348298396119, 0.234391064264729, -0.259117513844368, 0.795544572076051, 0.959788475572578  
"12764", "LIN7C", 150.77258611559, -0.0480639902225799, 0.184484305211575, -0.260531594638676, 0.794453747529662, 0.959788475572578  
"12765", "ARHGAP1", 336.885828095989, -0.0438196847674793, 0.169457423656966, -0.258588168177181, 0.795953013247754, 0.959788475572578  
"12766", "PCSK7", 243.639062100869, -0.0725995363684246, 0.278506123293734, -0.260674830089303, 0.794343277814381, 0.959788475572578  
"12767", "AP001267.3", 8.80738401378451, 0.129166213677674, 0.496479567358758, 0.260164208498712, 0.794737111326874, 0.959788475572578  
"12768", "HINFP", 31.6773680514724, 0.0774421468720367, 0.298972704156824, 0.259027482426673, 0.795614036036425, 0.959788475572578  
"12769", "ATN1", 305.600334974833, 0.0413920316948937, 0.159177958878344, 0.260036200907242, 0.794835849552153, 0.959788475572578  
"12770", "NANOG", 2.53522459551008, -0.238161033022083, 0.910164512433939, -0.261668115784034, 0.793577324154808, 0.959788475572578  
"12771", "DGKA", 35.0982318220201, -0.0786302488786739, 0.301619654101593, -0.260693385889864, 0.79432896703603, 0.959788475572578  
"12772", "VTI1B", 470.513367219885, -0.0512744099369424, 0.197377720107793, -0.259778104179845, 0.795034941587671, 0.959788475572578  
"12773", "NOM01", 47.7365257903863, -0.0959628972828661, 0.369729628050506

, -0.259548843269215, 0.795211801292154, 0.959788475572578  
"12774", "HEATR3", 21.3075386197993, -0.089664279890968, 0.34645368600825,  
-0.258805963140577, 0.795784956678421, 0.959788475572578  
"12775", "AC040169.1", 10.252506036408, -0.15061097819881, 0.5817917007267  
36, -0.258874401286021, 0.795732149883278, 0.959788475572578  
"12776", "RAP1GAP2", 3.99071374191922, 0.221596899405346, 0.85025392484938  
5, 0.260624376940806, 0.794382189114209, 0.959788475572578  
"12777", "LINC00910", 25.1441023690378, -0.116920359287882, 0.446631248954  
398, -0.261782756046745, 0.793488934262732, 0.959788475572578  
"12778", "DNM2", 116.107932122409, -0.0541908709342312, 0.209471350691604,  
-0.258703019555234, 0.795864389593234, 0.959788475572578  
"12779", "NOTCH3", 37.8108445088183, 0.141565434601655, 0.544788037117108,  
0.2598541541969, 0.794976276330558, 0.959788475572578  
"12780", "RPS11", 12143.840588238, -0.0476784855427246, 0.183726870500799,  
-0.259507416703738, 0.795243760283976, 0.959788475572578  
"12781", "ZNF749", 38.4247002811976, 0.108538564589182, 0.416436056716302,  
0.260636808073333, 0.794372601725984, 0.959788475572578  
"12782", "CPXM1", 702.517011785438, 0.121035996031059, 0.462104944277445, 0  
.261923178987648, 0.793380669034523, 0.959788475572578  
"12783", "PABPC1L", 6.86039275835605, 0.16921717333168, 0.653107887372988,  
0.259095283648045, 0.795561723687715, 0.959788475572578  
"12784", "SLC25A17", 58.7783308577795, -0.0642991353420864, 0.248348699241  
218, -0.258906672507406, 0.795707249770155, 0.959788475572578  
"12785", "SERPINB6", 534.813614600777, -0.0485256262070843, 0.187910884764  
518, -0.258237442008186, 0.796223663072939, 0.959836252632944  
"12786", "KLHDC3", 302.569202383209, -0.0594231606654273, 0.23022731869100  
9, -0.258106470610379, 0.7963247379126, 0.959836252632944  
"12787", "IL15RA", 252.844319311531, -0.080634637081695, 0.312268549538372  
, -0.25822208865061, 0.796235511575888, 0.959836252632944  
"12788", "ZNF641", 53.3335914087272, -0.10001099202485, 0.387431819959619,  
-0.258138301689506, 0.796300172530805, 0.959836252632944  
"12789", "AC116913.1", 8.87450500226891, 0.128629476888645, 0.498129872470  
109, 0.258224780318437, 0.796233434356871, 0.959836252632944  
"12790", "MITD1", 188.578873843278, 0.0542054144596294, 0.210207782811863,  
0.257865877916345, 0.796510419934211, 0.959984997911326  
"12791", "DCPS", 113.468840012773, 0.0706526552109416, 0.27425483960878, 0.  
257616803815482, 0.796702659780445, 0.96014162305649  
"12792", "KIF18A", 2.51878087209254, -0.245910096718084, 0.955151543852745  
, -0.257456629056128, 0.796826292042563, 0.960215548142285  
"12793", "AC006064.2", 3.8088339254139, -0.200399354695388, 0.778712043737  
823, -0.257347187971397, 0.79691076801475, 0.960242280070927  
"12794", "TSPAN10", 18.4517636724123, 0.130835782887608, 0.508933999722382  
, 0.257078094524983, 0.797118487424383, 0.960417499112621  
"12795", "FAM200A", 42.928160571034, 0.0794798074580195, 0.309335638926525  
, 0.256937117668805, 0.797227316433644, 0.960473550826465  
"12796", "NECAP2", 202.829110328668, 0.0530719145941842, 0.207462661491304  
, 0.255814295510755, 0.798094234895228, 0.960534238903653  
"12797", "RGPD8", 6.90518926823111, 0.146973563978038, 0.576172600519924, 0  
.255086000003146, 0.798656676953121, 0.960534238903653  
"12798", "FARSB", 64.8476140169291, -0.0601275080450035, 0.234448984496071



, -0.256463077348118, 0.797593287234594, 0.960534238903653  
"12799", "C3orf52", 4.23839297062278, -0.20046798949839, 0.781242989110153  
, -0.256601329282616, 0.797486548737153, 0.960534238903653  
"12800", "PLSCR1", 354.148849352953, 0.0556595948147757, 0.217728972013267  
, 0.255637062445618, 0.798231097351581, 0.960534238903653  
"12801", "MEOX2", 116.001302871829, -0.102022800035595, 0.399418221078932,  
-0.255428507392589, 0.798392155133301, 0.960534238903653  
"12802", "HOXA10-  
AS", 21.0993284984379, 0.0941303345559964, 0.36781454702991, 0.25591792199  
6549, 0.798014215594421, 0.960534238903653  
"12803", "PPP1R3B", 118.571259464289, -0.0697597079731495, 0.2731759944603  
82, -0.255365439818199, 0.798440861102873, 0.960534238903653  
"12804", "AC019270.1", 12.8608879496758, 0.17963396187002, 0.7028560185002  
21, 0.255577183863816, 0.798277338035819, 0.960534238903653  
"12805", "TMEM71", 7.00218078864645, 0.211545965667843, 0.826582876161488,  
0.255928318585823, 0.798006187572804, 0.960534238903653  
"12806", "ZDHC6", 107.150699110713, -0.0584096398943353, 0.22910032463711  
6, -0.254952235387939, 0.798759990956149, 0.960534238903653  
"12807", "TNNT3", 834.906340902442, 0.078309233062863, 0.30613196555881, 0.  
255802209089528, 0.798103568042873, 0.960534238903653  
"12808", "HOXC-  
AS3", 28.3841354643721, -0.0933165259383689, 0.364192360452814, -0.2562286  
74929768, 0.797774268119232, 0.960534238903653  
"12809", "MYL6B", 356.700417241664, -0.0698969807188569, 0.274015760508945  
, -0.255083797329881, 0.798658378174137, 0.960534238903653  
"12810", "AL049828.1", 4.98404594755631, 0.167030249622124, 0.654655950764  
214, 0.255142032127166, 0.798613401211595, 0.960534238903653  
"12811", "PIGH", 118.108881647802, -0.0547344848359475, 0.214637252701538,  
-0.255009250011498, 0.798715954896038, 0.960534238903653  
"12812", "EIF2B2", 78.1719259391857, 0.0649839278001447, 0.253357541267205  
, 0.256490994801725, 0.797571733039127, 0.960534238903653  
"12813", "FAM192A", 146.335345558454, -0.0494755619744976, 0.1939350142575  
7, -0.255114127605591, 0.798634952858111, 0.960534238903653  
"12814", "TEKT3", 35.7206216175546, 0.101267728882223, 0.396491415913531, 0.  
.255409637681307, 0.798406727794532, 0.960534238903653  
"12815", "KDSR", 877.251851680594, -0.0475526545404745, 0.186079477688966,  
-0.255550236549779, 0.798298148082218, 0.960534238903653  
"12816", "TECR", 299.732633607519, -0.062294918390257, 0.243145127550888, -  
0.256204675033923, 0.797792798927256, 0.960534238903653  
"12817", "BAX", 271.751055626486, -0.0642114254334734, 0.251478214046549, -  
0.255335937058897, 0.798463645830143, 0.960534238903653  
"12818", "RIN2", 210.265202449918, -0.0790344448477498, 0.308532112252891,  
-0.256162784063685, 0.797825144070947, 0.960534238903653  
"12819", "EDA", 34.1489408780641, -0.0675682491945872, 0.265040905999581, -  
0.254935172892497, 0.798773169543038, 0.960534238903653  
"12820", "KLRF1", 3.20094599719436, 0.240358299899259, 0.943269098003617, 0.  
.25481413565648, 0.798866656912016, 0.960571725140306  
"12821", "AL592295.4", 7.70660581983997, 0.165927594453028, 0.651771867880  
541, 0.254579251775009, 0.799048085970135, 0.960677006455066  
"12822", "SOD2-

OT1",2.8773090595961,-0.205499477349159,0.807802023613843,-0.254393367  
857413,0.799191674156417,0.960677006455066  
"12823","POLB",24.2740851561142,0.0801357283914713,0.315015469555681,0  
.254386644898741,0.799196867511012,0.960677006455066  
"12824","PTPN2",135.123112403979,-0.0593751562252094,0.233413039017278  
, -0.254378060776692,0.799203498590968,0.960677006455066  
"12825","ABRAXAS1",215.158527508494,-0.0487573711258784,0.191783786674  
357,-0.254230933549493,0.799317153979376,0.960738707882424  
"12826","TMEM8B",76.1490515826912,0.0513825608014322,0.202202390853062  
,0.254114506681433,0.799407096435993,0.960771900168472  
"12827","AC108488.1",30.9146615951729,-0.0878056275551487,0.3474029246  
4623,-0.252748671141913,0.800462434491882,0.960884067017162  
"12828","AL121658.1",6.03782634716648,-0.180557310470569,0.71334630306  
348,-0.253113122890189,0.800180798398756,0.960884067017162  
"12829","LINC02245",3.78659993679744,-0.20369068533282,0.8052894838917  
25,-0.252940947829646,0.800313846278159,0.960884067017162  
"12830","SG02",28.746249768001,0.0853193149276548,0.337842580489202,0.  
252541626943859,0.800622442865289,0.960884067017162  
"12831","EOGT",22.5302586531695,0.116407234789039,0.459927494030177,0.  
253099099966833,0.800191634363479,0.960884067017162  
"12832","AC093849.4",3.22705835457903,-0.240816678552577,0.95121400492  
5912,-0.253167717575114,0.800138611692939,0.960884067017162  
"12833","OSMR-  
AS1",26.1180503036507,-0.10456456207635,0.412508019860556,-0.253484919  
18217,0.79989351345833,0.960884067017162  
"12834","LARS",226.739566496346,0.0517815633240098,0.204244456622672,0  
.253527386643705,0.799860700807592,0.960884067017162  
"12835","ECHDC1",305.687284838495,0.0567005859567017,0.223373801717573  
,0.253837224959766,0.799621313712179,0.960884067017162  
"12836","DNAJC30",85.0773753759576,0.0681979469270973,0.26940612152616  
5,0.253141786611088,0.800158649137676,0.960884067017162  
"12837","TRIP6",399.157116018158,0.0632052727958654,0.250150458451737,  
0.252669026421392,0.800523984717404,0.960884067017162  
"12838","AC026979.2",24.6558209046265,-0.11682633515395,0.461860906830  
095,-0.252947009427076,0.800309162094351,0.960884067017162  
"12839","PITRM1",72.127543451565,0.0544006013079246,0.215186046197581,  
0.252807290571131,0.800417133610373,0.960884067017162  
"12840","AL158211.1",3.27646260751472,0.202687415690034,0.802426220004  
36,0.252593211234962,0.800582576591947,0.960884067017162  
"12841","RUBCNL",4.41566071738458,-0.196053155226754,0.773533492769535  
, -0.253451411036917,0.799919403907508,0.960884067017162  
"12842","LINC00519",16.5320238415052,0.137085652417163,0.5410795054285  
07,0.253355839653543,0.799993249430673,0.960884067017162  
"12843","COPS2",371.459022754315,-0.0514641702701404,0.203009719641334  
, -0.253505942282292,0.799877269833403,0.960884067017162  
"12844","LRRC37A2",15.6243975638766,-0.154449877357428,0.6098861595271  
71,-0.253243781556166,0.800079836086438,0.960884067017162  
"12845","MFN2",65.9441068862841,-0.0573623421597451,0.229331468658276,  
-0.250128525733292,0.802487956624733,0.960960048759806  
"12846","ARHGEF19",18.006455897175,-0.0945533853933005,0.3759088382115

61,-0.25153275417293,0.801402241833271,0.960960048759806  
"12847","TPR",833.331407560816,-0.0500869209029137,0.201223227789322,-  
0.24891222277457,0.803428680403268,0.960960048759806  
"12848","FLVCR1",27.0896971451214,-0.082868701774777,0.331365753613262  
, -0.250082275766775,0.802523722456993,0.960960048759806  
"12849","EPHX1",1628.4754951603,-0.065680211358386,0.262446034714367,-  
0.250261778311374,0.802384912607349,0.960960048759806  
"12850","GFPT1",229.644775995817,0.0492390096911791,0.197718087945609,  
0.249036444782555,0.803332590438171,0.960960048759806  
"12851","IL18RAP",2.43296210653289,0.269369494417336,1.07528736407911,  
0.250509308874869,0.802193506718077,0.960960048759806  
"12852","GORASP2",243.606550733988,-0.0516296781515225,0.2046140437585  
96,-0.2523271482403,0.800788205612917,0.960960048759806  
"12853","CAMK1",182.428597172193,-0.0592416758135199,0.237966935825961  
, -0.24894918954979,0.803400085029703,0.960960048759806  
"12854","ACAA1",267.222996528484,0.0595321779885437,0.238818061730463,  
0.249278373491421,0.803145458853808,0.960960048759806  
"12855","ZBTB11",109.987338991385,0.0487181413283653,0.195427631667985  
, 0.249289933631971,0.803136517380508,0.960960048759806  
"12856","TPRA1",112.578555115182,0.0630057792105543,0.25243542471693,0  
.249591669953637,0.802903141163672,0.960960048759806  
"12857","SEC62",1704.11467533803,-0.0423294310051495,0.16878762246617,  
-0.250785160586248,0.801980215155101,0.960960048759806  
"12858","DCTD",268.305731699426,0.0509702558230535,0.204042592822726,0  
.249802039456227,0.802740442482763,0.960960048759806  
"12859","FEM1C",245.944587698731,-0.101052766884954,0.402357782738453,  
-0.251151515442767,0.801696968382466,0.960960048759806  
"12860","C7orf61",3.74394495472677,0.206073345751501,0.817503112741144  
, 0.252076527342535,0.800981912706516,0.960960048759806  
"12861","PCMTD1",669.690137357862,0.0469708482726697,0.18750027833683,  
0.250510818913507,0.802192339099536,0.960960048759806  
"12862","GDF6",14.6549745212888,0.137230963616151,0.548955144159565,0.  
249985750340763,0.802598368431585,0.960960048759806  
"12863","AP001330.4",7.28452174638369,-0.132865307363714,0.53151243762  
6273,-0.249975913935502,0.802605975316632,0.960960048759806  
"12864","AZIN1",389.09249997385,-0.045388740179912,0.181698708222246,-  
0.249802217219917,0.802740305004862,0.960960048759806  
"12865","ABCA2",59.8753417594641,0.060809163759772,0.241730456182256,0  
.251557725576475,0.801382938023856,0.960960048759806  
"12866","TWNK",7.79001767148349,0.150712666028635,0.605414424028581,0.  
248941320270757,0.803406172229827,0.960960048759806  
"12867","RHOD",72.5372082580095,-0.0928367168853593,0.371989823945872,  
-0.249567893821923,0.802921530037931,0.960960048759806  
"12868","TPCN2",21.0101746450557,-0.0906243334700985,0.360566938204505  
, -0.251338444731997,0.801552454288504,0.960960048759806  
"12869","C11orf71",85.3951110708715,-0.0733689457082747,0.292808212931  
09,-0.250569971975279,0.802146600079931,0.960960048759806  
"12870","ZNF384",73.3491969814527,-0.05551589286975,0.222975899012453,  
-0.248977100734324,0.803378494715204,0.960960048759806  
"12871","RAPGEF3",3.22212984895058,0.21855985919643,0.870508863587605,

0.251071377143347,0.801758924977064,0.960960048759806  
"12872","DDX23",151.971614267361,0.0454950156106343,0.181049066478839,  
0.251285557531177,0.801593340429121,0.960960048759806  
"12873","MMP19",194.091081453696,0.0920045512626791,0.366398547877464,  
0.251105119809177,0.801732837664747,0.960960048759806  
"12874","ANKRD52",36.3391840939809,0.0729263000013465,0.29229027059194  
2,0.249499580857266,0.802974365081366,0.960960048759806  
"12875","NUP37",94.8813360603263,0.0712537197996241,0.283522403478308,  
0.251316012158015,0.801569796440293,0.960960048759806  
"12876","CUL4A",147.436227231476,0.0487955680733636,0.194276749945018,  
0.251165247962884,0.80168635160922,0.960960048759806  
"12877","WDR25",28.176971016983,0.0804885798834659,0.322711740153337,0  
.249413237476956,0.803041146610848,0.960960048759806  
"12878","LINC02323",2.58222556442233,-0.277062258775717,1.105237684233  
28,-0.250681154586147,0.802060632000935,0.960960048759806  
"12879","AC090510.1",6.22448217816576,0.234897575720933,0.931635614671  
002,0.252134602866041,0.800937024534428,0.960960048759806  
"12880","ERCC4",76.2482152341649,0.0533342773345618,0.213386347778213,  
0.249942313038675,0.802631960373215,0.960960048759806  
"12881","ZNF785",49.4453910626768,0.0728065737183375,0.28939798964257,  
0.251579403879963,0.80136617999971,0.960960048759806  
"12882","SRCAP",83.5964908380953,0.0597075561943166,0.238921815473419,  
0.249904162480965,0.802661464147925,0.960960048759806  
"12883","AC079414.3",11.1815815666443,0.134954972947754,0.541144205161  
178,0.249388188325065,0.803060520926624,0.960960048759806  
"12884","RAD51D",54.942675341566,0.0577048772792882,0.230860519995633,  
0.249955589116666,0.802621693370049,0.960960048759806  
"12885","PLCD3",129.995223228236,0.0480863696979349,0.192498536924429,  
0.249801221693507,0.802741074919656,0.960960048759806  
"12886","MIER2",28.2829128021622,0.079254828361554,0.315170490397977,0  
.251466526137888,0.801453439116875,0.960960048759806  
"12887","NR2F6",157.708331104283,-0.0624676564222455,0.248917921590429  
, -0.250956845626528,0.801847473850869,0.960960048759806  
"12888","RYR1",4.46061029163917,0.269419806884665,1.07720004897637,0.2  
50111209278802,0.802501347665038,0.960960048759806  
"12889","MXRA8",3288.64372469674,-0.05103448271369,0.205401445959596,-  
0.248462139471641,0.803776860082327,0.960961319400101  
"12890","FAM229A",19.3631719781233,0.0970127140736719,0.39047002040643  
7,0.248451120453991,0.803785384766336,0.960961319400101  
"12891","RPL31",4390.09449260115,0.0480953757255957,0.193337207691792,  
0.248764199606455,0.803543185258017,0.960961319400101  
"12892","IFT80",87.6486244837074,0.0548156818805278,0.22065075827899,0  
.248427344225208,0.803803778939014,0.960961319400101  
"12893","HOXC6",224.41737658723,-0.040439516088371,0.162634456737621,-  
0.24865281871733,0.803629347878502,0.960961319400101  
"12894","GAS8",30.0379160113272,-0.0820968765381635,0.330410539917054,  
-0.248469302942857,0.803771318191704,0.960961319400101  
"12895","CCDC106",64.0033256236192,-0.092059951703548,0.37075008829049  
2,-0.248307295429197,0.80389665480039,0.960997823477938  
"12896","AC108471.2",17.2946424626873,0.107660646589392,0.433766040325

605,0.248199804919207,0.803979817281575,0.961022711181411  
"12897","LINC01002",6.70294673321313,0.162761522421754,0.6559893331171  
92,0.248116111352495,0.804044570251964,0.961025591256418  
"12898","CD276",588.675581528325,0.0436144150428354,0.175853241710382,  
0.248015985481037,0.804122038517367,0.961043667525601  
"12899","PAP0LA",524.213360057003,-0.0326840806937188,0.13190200025048  
5,-0.247790637228026,0.804296399474411,0.961103023092872  
"12900","SLC7A60S",105.481886388992,0.0536804254018146,0.2165713839587  
86,0.247864812149098,0.804239006295688,0.961103023092872  
"12901","TP53I3",428.076483825191,0.0654733778953341,0.264575410672783  
,0.247465846235836,0.804547720383472,0.961328820224108  
"12902","WNK3",4.96774516089117,-0.188470152727185,0.762567847632064,-  
0.247151979082812,0.804790607698399,0.961544506097568  
"12903","GEMIN5",71.7686396525856,-0.0522964260370774,0.21203478439720  
9,-0.24664078672634,0.805186236212795,0.961776251346395  
"12904","SPTAN1",880.599104357834,0.0425061645737862,0.172332979460083  
,0.24665136474143,0.805178049034539,0.961776251346395  
"12905","ZNF45",17.9092657222894,0.104009682529429,0.421810973934727,0  
.246578891865255,0.805234142061406,0.961776251346395  
"12906","SUM03",752.288020038574,-0.0466792712521203,0.189146680197356  
, -0.246788741961609,0.805071723674399,0.961776251346395  
"12907","FASTKD1",15.3519523351834,0.0931625145912886,0.37820060363931  
3,0.246330951602968,0.805426052053321,0.96178190350933  
"12908","AN07",3.5370427868345,-0.192417721921379,0.781048769071064,-0  
.246358139902365,0.805405007273471,0.96178190350933  
"12909","ZNF699",35.53615057229,0.0717914101945549,0.291309785007779,0  
.246443524691894,0.80533891710898,0.96178190350933  
"12910","GIGYF2",229.374908126415,0.0587355108445245,0.238917475373083  
,0.245840161975618,0.805805966149979,0.962161035492016  
"12911","AEBP2",140.654495251997,0.0504247419719081,0.205218255678442,  
0.245712750092365,0.805904601589822,0.962204278019294  
"12912","SPATA41",15.2080397538589,-0.112478167778599,0.45826846438544  
8,-0.245441649425813,0.80611448344524,0.962380325457588  
"12913","BCAT1",95.2442545978735,-0.0581517272461829,0.237019564569476  
, -0.245345684234169,0.806188781528925,0.962394491386075  
"12914","EN03",2.3707563878971,-0.242075932529808,0.987084048495263,-0  
.245243485495318,0.806267907667343,0.962414418204436  
"12915","SH3D21",4.98348333406438,-0.184783792532296,0.754249806309622  
, -0.244990175650694,0.806464038301153,0.962573995386162  
"12916","WASF2",1602.63238832581,0.0351156173398828,0.143510940180781,  
0.244689480088748,0.806696874152346,0.962641613317644  
"12917","MFN1",122.822414948345,-0.0458239047812374,0.187284733859537,  
-0.244675066872269,0.806708035085133,0.962641613317644  
"12918","ZCCHC10",133.193604284296,0.0503655642420801,0.20581982991586  
7,0.244707054041722,0.806683265743657,0.962641613317644  
"12919","AL592148.3",14.6581326703124,0.115673795114732,0.473381738307  
806,0.244356268427739,0.806954908016235,0.962678613449287  
"12920","PKDCC",567.824404513694,0.0676230240741117,0.276651059408268,  
0.244434357919146,0.806894434857621,0.962678613449287  
"12921","AC084198.2",9.47274582190065,0.145496960049011,0.595536421963

234,0.244312446196604,0.806988844825929,0.962678613449287  
"12922","AC006333.2",49.9120969717273,-0.0761763528243053,0.3116440830  
82129,-0.24443381716389,0.806894853619069,0.962678613449287  
"12923","ARIH2",181.82265120015,0.0434411884043724,0.177908581272869,0  
.244177026726688,0.807093718659923,0.962729217143288  
"12924","SLC66A1",34.3896016353381,0.0702070916575364,0.28883338271919  
4,0.24307125096337,0.80795020181876,0.962736067139256  
"12925","AL604028.1",8.78929653847634,0.125749895786695,0.517517734647  
335,0.242986640588053,0.808015746627497,0.962736067139256  
"12926","SHISAL2A",3.90843953906413,0.178832850922475,0.73379937458834  
5,0.243708099400874,0.807456900066663,0.962736067139256  
"12927","FAM171B",91.6145165251392,0.0672523501017513,0.27556538057126  
4,0.244052246194109,0.807190356378232,0.962736067139256  
"12928","RFT1",84.5983492738797,-0.0561356165757647,0.230227761472282,  
-0.243826444807452,0.807365238338922,0.962736067139256  
"12929","PAK2",383.365432691413,-0.044066330193468,0.181372676311523,-  
0.242960136496969,0.808036278731605,0.962736067139256  
"12930","LINC02615",10.7896170093225,0.158366338603556,0.6509563968923  
18,0.243282559875901,0.807786513807577,0.962736067139256  
"12931","AL356776.2",3.4628676176165,-0.204060974029559,0.837790178157  
286,-0.243570501719643,0.807563476527114,0.962736067139256  
"12932","NDUF6",41.2511930316187,-0.0723637527570413,0.2969280511548  
92,-0.243708037942474,0.807456947668548,0.962736067139256  
"12933","RAB14",618.467668786109,-0.0396781678992946,0.163250049738287  
,-0.243051490415496,0.807965509529184,0.962736067139256  
"12934","AL135791.1",5.43394988055226,-0.16053586728148,0.659876474277  
7,-0.24328169519485,0.807787183605636,0.962736067139256  
"12935","NUP98",113.443334840777,-0.0518074203939281,0.212905723706913  
,-0.24333502872495,0.80774587072283,0.962736067139256  
"12936","YY1",764.216149035701,0.0289304085164004,0.118646818782873,0.  
243836360832765,0.807357558228402,0.962736067139256  
"12937","PET100",541.899395125193,-0.0686628278804682,0.28204906769613  
4,-0.243442846456923,0.807662355268717,0.962736067139256  
"12938","NKILA",5.54525967946866,-0.164159229000243,0.675058659041959,  
-0.243177725078318,0.807867721822692,0.962736067139256  
"12939","PIGF",149.36806179342,0.0678365734662591,0.279692217957464,0.  
242540081957431,0.808361702876131,0.962764428289336  
"12940","MGAT4A",8.61868044129405,0.126653256187228,0.522128345254282,  
0.242571117500901,0.808337657922433,0.962764428289336  
"12941","DHX16",76.2664207185668,-0.0669157445388921,0.276074915382791  
,-0.242382559263344,0.808483747218131,0.962764428289336  
"12942","SLC22A3",2.97312672549066,-0.242966637291239,1.00248196006356  
,-0.242365096800182,0.808497276951376,0.962764428289336  
"12943","ASH2L",123.511092565837,-0.0494406062813587,0.203908629441772  
,-0.242464511760533,0.808420252048218,0.962764428289336  
"12944","RAB6A",309.787090779112,-0.0356054474260582,0.146727199048393  
,-0.242664261684127,0.808265495054056,0.962764428289336  
"12945","ZNF222",16.9318384298605,0.109142074008463,0.449715994778465,  
0.242691110113234,0.808244694705778,0.962764428289336  
"12946","HNRNPA2B1",2255.48489980941,0.0331915941462951,0.137143852110

603,0.2420202847994,0.808764445395456,0.96300818212351  
"12947","CHCHD6",78.5936318385702,-0.062680062440398,0.259796701882562  
,-0.24126581279208,0.809349105768685,0.963258130400944  
"12948","AC113349.2",3.17957166244206,-0.265001107535355,1.09736076007  
968,-0.241489505708327,0.809175749079368,0.963258130400944  
"12949","FRAT1",22.192739105434,-0.109001561634858,0.451362762124906,-  
0.241494360593029,0.809171986762999,0.963258130400944  
"12950","OLMALINC",22.5872591352446,0.0873335339845352,0.3617838189260  
27,0.241397015056641,0.809247425999411,0.963258130400944  
"12951","AC025682.1",2.45922115916439,0.231902279381522,0.960004902003  
15,0.241563640870619,0.809118298157596,0.963258130400944  
"12952","TSPAN7",5.27087796543389,-0.173180811898289,0.717801583677092  
,-0.241265575106611,0.809349289974248,0.963258130400944  
"12953","AL161669.3",38.2707100343067,0.109576090138093,0.454489364512  
,-0.24109714922757,0.809479822206607,0.963339107489759  
"12954","SLC35G1",21.5962691901778,-0.0912608249624262,0.3788371182013  
97,-0.24089726317132,0.809634743360749,0.963374725504126  
"12955","HNRNPA1",2415.68530216814,-0.0528587754825344,0.2193872729577  
22,-0.240938203797814,0.809603011829822,0.963374725504126  
"12956","NFX1",125.494548438381,-0.0547474832600819,0.227388122484418,  
-0.240766679727669,0.809735955739072,0.963420790191247  
"12957","IARS2",245.154705655434,0.037394616986,0.155407131844869,0.24  
0623557890046,0.809846890008134,0.96347841394423  
"12958","YPEL2",267.594972755678,-0.0753813758936341,0.31339841436466,  
-0.240528900078999,0.809920261728911,0.963491343922763  
"12959","AL133243.2",14.540293043656,-0.101950710404757,0.424273221645  
784,-0.240294944868978,0.810101613636744,0.963558362207593  
"12960","ZBTB20-  
AS4",5.13322009223232,-0.162139777126136,0.67467589291808,-0.240322470  
134297,0.810080276718321,0.963558362207593  
"12961","GOLGA7",297.791888993519,0.0507555327769894,0.211296746225524  
,-0.240209722504748,0.810167676842419,0.963562590735737  
"12962","SZRD1",267.779907965471,-0.0409045414866369,0.172462012245809  
,-0.237180008246313,0.812517144980288,0.963591066349701  
"12963","LAMTOR5",694.617733106928,-0.0597660412903136,0.2505809175799  
12,-0.23850994667722,0.811485601598347,0.963591066349701  
"12964","PIK3C2B",43.3879584361238,0.078360256904325,0.328318157018907  
,-0.238671712877008,0.811360152769656,0.963591066349701  
"12965","NSL1",200.099332806392,0.0426412111547781,0.179912039555027,0  
.237011437701677,0.812647917036676,0.963591066349701  
"12966","GAREM2",28.8997023507776,0.070803556153629,0.297136949035428,  
0.238285936446049,0.811659328334319,0.963591066349701  
"12967","MEMO1",25.567709868647,-0.0908619113459025,0.379666319133648,  
-0.239320442100943,0.810857115391645,0.963591066349701  
"12968","OXER1",9.7571778696503,-0.127612555956054,0.53230032024646,-0  
.23973789062717,0.810533458889139,0.963591066349701  
"12969","RNF103",178.346240664992,-0.048985380758516,0.205601378707692  
,-0.238254145309792,0.811683984077391,0.963591066349701  
"12970","NHEJ1",48.5691038304849,0.0634082061044289,0.264278555626461,  
0.239929440942049,0.810384956793932,0.963591066349701

"12971", "BOK", 35.9941135639776, -0.0864584386770669, 0.360967384586304, -0.239518699940591, 0.810703397940516, 0.963591066349701  
"12972", "PRRT3-  
AS1", 8.18394330397891, 0.136020555082469, 0.567933773276054, 0.239500733153888, 0.810717328027965, 0.963591066349701  
"12973", "H1FX", 1133.33086092693, 0.0545896873612444, 0.228367753521529, 0.239042888146193, 0.811072326631274, 0.963591066349701  
"12974", "BOD1L1", 741.248439988447, -0.0460738184730946, 0.193733832079974, -0.237820198869938, 0.812020551639654, 0.963591066349701  
"12975", "FYB1", 26.134444430408, 0.108638924381942, 0.454612060829414, 0.238970616361863, 0.811128367449836, 0.963591066349701  
"12976", "GLRX", 478.68656745164, 0.0766951084491497, 0.322898243510206, 0.237520983748323, 0.812252642230638, 0.963591066349701  
"12977", "B3GALT4", 110.961790461548, -0.0694933842514041, 0.291672676803473, -0.238258122128554, 0.811680899829451, 0.963591066349701  
"12978", "LYRM2", 207.093397392717, -0.0442710253242779, 0.185505022815252, -0.238651356456091, 0.811375938799622, 0.963591066349701  
"12979", "PREP", 51.7618279419166, 0.0612914836844307, 0.255986939205461, 0.239432073662308, 0.810770561956692, 0.963591066349701  
"12980", "RP9", 107.852211090713, 0.0603378654073265, 0.251888441844066, 0.239542016956377, 0.810685319779496, 0.963591066349701  
"12981", "SPIDR", 78.845153151868, -0.0507964704692923, 0.21379616642128, -0.23759299018112, 0.812196787878634, 0.963591066349701  
"12982", "C8orf33", 192.260910500598, 0.052811007292065, 0.222278380558547, 0.237589490976855, 0.812199502138857, 0.963591066349701  
"12983", "PMPCA", 111.277832767611, 0.0418158317094704, 0.176433363188619, 0.237006374269285, 0.812651845179021, 0.963591066349701  
"12984", "FUT4", 61.4733725388211, -0.059359360308905, 0.248398223304503, -0.238968538177257, 0.811129978925217, 0.963591066349701  
"12985", "IFF01", 136.534692793805, 0.0492152340867677, 0.20758217535123, 0.237087958074894, 0.812588554140397, 0.963591066349701  
"12986", "BL0C1S1", 1121.19937522547, -0.0598378686596252, 0.251445164997751, -0.237975817352305, 0.81189985041175, 0.963591066349701  
"12987", "AC025164.1", 8.82736004041875, 0.130690007529718, 0.550595054671193, 0.237361390046927, 0.812376440168987, 0.963591066349701  
"12988", "RHOF", 11.7145838729052, -0.114225990486405, 0.477111981920322, -0.239411280401423, 0.810786683818318, 0.963591066349701  
"12989", "DNAH100S", 4.0659488525889, -0.206568184478218, 0.868783860620379, -0.237767060187688, 0.812061768231271, 0.963591066349701  
"12990", "LINC00539", 4.82036738762367, 0.17096629136447, 0.720632700465446, 0.237244703514072, 0.812466957687957, 0.963591066349701  
"12991", "TEX30", 76.7570632566987, -0.0699656287483137, 0.294573957127677, -0.237514644643173, 0.812257559428885, 0.963591066349701  
"12992", "EMC9", 31.4512294731409, 0.0920292307293168, 0.388383403380586, 0.236954591592409, 0.812692017749755, 0.963591066349701  
"12993", "LBHD2", 33.0706906412643, 0.234342382557024, 0.987691142824696, 0.237262816680555, 0.812452906554328, 0.963591066349701  
"12994", "NDN", 884.721620889514, 0.0575160004650912, 0.242720878049324, 0.236963548118853, 0.812685069315653, 0.963591066349701  
"12995", "SIN3A", 117.157037514209, 0.0550329233285713, 0.231804242221137,



0.237411200076618,0.812337801680765,0.963591066349701  
"12996","CMTM1",5.5883749434261,0.175516383557916,0.731667322194642,0.  
23988550292427,0.810419019761655,0.963591066349701  
"12997","RND2",7.37789332583301,-0.153048091241564,0.641057766703488,-  
0.238743057476058,0.811304826950959,0.963591066349701  
"12998","AC005944.1",3.18717004690878,0.232453522022677,0.972599111354  
686,0.239002400175859,0.811103721599619,0.963591066349701  
"12999","ZNF211",10.7817573180546,0.107988002303502,0.452250025244247,  
0.238779427917512,0.811276623013946,0.963591066349701  
"13000","NRSN2-  
AS1",15.2153224777032,-0.0911529159664837,0.383279954807663,-0.2378233  
3206605,0.812018121417543,0.963591066349701  
"13001","SLC16A2",42.8227387098435,-0.0698915655217758,0.2931199058292  
36,-0.238440188236457,0.811539700392489,0.963591066349701  
"13002","GPR153",58.5490107817753,0.0611216252306483,0.258084388173831  
,0.236828061019639,0.812790181191013,0.96363333664509  
"13003","METTL18",34.0317758309291,0.0855076698127885,0.36138362889631  
3,0.236611907611681,0.812957881556402,0.963683923730539  
"13004","ZNF460",53.3308978014746,0.077868753497,0.329026400810781,0.2  
36664150065518,0.812917349007613,0.963683923730539  
"13005","C5orf15",421.314117233798,0.0518858877528618,0.21959701868245  
,0.236277742130424,0.813217157234155,0.963907522523684  
"13006","ARMC1",168.881138042156,-0.0429795116383788,0.181968991812111  
, -0.236191403878066,0.813284149555689,0.963907522523684  
"13007","PSMD5",121.293876362268,-0.0438884648817434,0.185868025328909  
, -0.236127030478099,0.813334099608534,0.963907522523684  
"13008","ZDHHC18",49.2574231373504,0.0579086101442383,0.24960178136163  
3,0.232003993835036,0.816534911798681,0.96396893526626  
"13009","C1orf122",611.191807159191,0.0732355620057298,0.3146904054408  
2,0.232722576664328,0.81597683685638,0.96396893526626  
"13010","C1orf52",184.909686720717,-0.0489419174161929,0.2115814887112  
03,-0.23131474173053,0.817070294971014,0.96396893526626  
"13011","ST7L",63.2867957654497,-0.0592901238506071,0.25557350770249,-  
0.231988535836923,0.816546918009216,0.96396893526626  
"13012","TUFT1",31.2946440154603,0.085005044293077,0.363577062199215,0  
.233801999991133,0.815138696836471,0.96396893526626  
"13013","Z99127.4",21.2176349571109,0.117334351892082,0.50536697447882  
1,0.232176532732649,0.816400903945309,0.96396893526626  
"13014","SEC16B",19.1559376801076,0.106315350448274,0.455255165234679,  
0.233529147095935,0.815350539034549,0.96396893526626  
"13015","AC104463.2",2.47811234034627,0.272252112098979,1.167394868454  
74,0.233213387736879,0.815595710535787,0.96396893526626  
"13016","ZFP36L2",6639.2470022523,-0.0367629821531029,0.15813225225204  
1,-0.232482505178689,0.816163273861875,0.96396893526626  
"13017","ZNF502",25.842660010869,0.0782900986631752,0.333155253482899,  
0.234995840061679,0.814211961976605,0.96396893526626  
"13018","POC1A",4.25674284479242,-0.16354359193699,0.701527742492597,-  
0.233124910150956,0.815664412237873,0.96396893526626  
"13019","PCCB",44.8710269684012,0.0701053518066944,0.300302388679534,0  
.23344919803987,0.815412613808069,0.96396893526626

"13020", "AADACL2", 4.79947368309499, -0.228728114391461, 0.98919035692644  
4, -0.231227602240435, 0.817137987487786, 0.96396893526626  
"13021", "TMEM44", 74.6474265995353, 0.0555936365617943, 0.237260619054775  
, 0.234314640091872, 0.814740721104147, 0.96396893526626  
"13022", "TLR6", 6.73574422196953, -0.163185200189689, 0.701458860502927, -  
0.232636879193015, 0.816043387421607, 0.96396893526626  
"13023", "SCFD2", 41.0598427690512, -0.0666103973594908, 0.287405676215785  
, -0.231764376530544, 0.816721027139504, 0.96396893526626  
"13024", "AC110609.1", 2.8327791445003, -0.209623538433171, 0.892497369895  
102, -0.234873004116313, 0.814307303100978, 0.96396893526626  
"13025", "AC104118.1", 2.72938156970985, -0.237421920980949, 1.01500206549  
926, -0.233912746634821, 0.815052717317661, 0.96396893526626  
"13026", "LMBRD1", 368.414033545639, 0.0378742439228123, 0.163493942738591  
, 0.231655334065611, 0.816805725929117, 0.96396893526626  
"13027", "AC019205.1", 30.6443247435931, -0.0880286466650826, 0.3763202388  
62566, -0.233919512092016, 0.815047464943942, 0.96396893526626  
"13028", "PEX7", 40.2774186855113, -0.0762403946068828, 0.32700741523792, -  
0.23314576689771, 0.815648217115877, 0.96396893526626  
"13029", "AC018647.1", 3.47767169420368, 0.216630275858658, 0.925323940425  
706, 0.234112905107583, 0.814897327476897, 0.96396893526626  
"13030", "BET1", 153.234800718114, 0.0547508719385558, 0.233455282822725, 0  
.234524022230548, 0.814578186093063, 0.96396893526626  
"13031", "FMC1", 233.559511720472, -0.0596638055534268, 0.257114712468013,  
-0.232051308852462, 0.816498162543068, 0.96396893526626  
"13032", "EPHB6", 66.2241488710821, 0.0873753966980786, 0.37695475762911, 0  
.231792794572043, 0.816698953763016, 0.96396893526626  
"13033", "PLIN2", 1189.23191110504, -0.0683851313205469, 0.291571771384353  
, -0.234539616081013, 0.814566081527559, 0.96396893526626  
"13034", "CTSL", 1592.72744818544, -0.0768589597671337, 0.331822187980373,  
-0.231626945247193, 0.816827777309195, 0.96396893526626  
"13035", "NOTCH1", 9.14128450210595, -0.125600844849524, 0.536133482351958  
, -0.234271592772991, 0.81477413801099, 0.96396893526626  
"13036", "NMT2", 160.408590071471, 0.0407669934774783, 0.174286762524174, 0  
.23390757213603, 0.81505673455384, 0.96396893526626  
"13037", "ARHGAP22", 9.88260369580498, 0.19361266237795, 0.837229524046199  
, 0.231253983307051, 0.817117493755967, 0.96396893526626  
"13038", "KIF11", 4.13402265310713, 0.178056823397216, 0.759791710474133, 0  
.234349520983986, 0.814713643903731, 0.96396893526626  
"13039", "MGMT", 552.872538567814, 0.0680687571303337, 0.290808528256547, 0  
.23406726597194, 0.81493275805195, 0.96396893526626  
"13040", "RPS3", 10942.9445765858, -0.059039229004495, 0.254510913814183, -  
0.231971305747616, 0.816560300651821, 0.96396893526626  
"13041", "PGR", 33.1644738281114, 0.0909306613356902, 0.390077757213451, 0.  
233109065190643, 0.815676715794421, 0.96396893526626  
"13042", "FDX1", 267.182913340037, -0.0452552427019842, 0.194434781985831,  
-0.232752814284443, 0.815953355375139, 0.96396893526626  
"13043", "PLEKHA5", 546.987274478377, -0.0460342263391216, 0.1983939020526  
23, -0.232034482223709, 0.816511231626153, 0.96396893526626  
"13044", "PPFIBP1", 372.751669807885, -0.0507886641889993, 0.2184703766598  
78, -0.232473916901186, 0.816169943621229, 0.96396893526626

"13045", "PLBD2", 304.747319007782, -0.0396770291279206, 0.171378276379155, -0.231517260916662, 0.816912977386844, 0.96396893526626  
"13046", "UBE2L5", 5.16410740730607, -0.15833174677297, 0.67131678929374, -0.235852505550388, 0.813547123670701, 0.96396893526626  
"13047", "RFXAP", 64.6657678157241, -0.0528787264620353, 0.22808769972865, -0.23183506399049, 0.816666121762844, 0.96396893526626  
"13048", "AC004846.2", 2.36698502093341, 0.240990977863621, 1.03185942419271, 0.23355020287978, 0.815334190904073, 0.96396893526626  
"13049", "SRP14-AS1", 31.1626557457899, 0.0816346081690747, 0.346078476177748, 0.235884672952462, 0.813522161906217, 0.96396893526626  
"13050", "WDR24", 25.7919620241495, 0.0761062971880799, 0.329009030765194, 0.231319781742998, 0.817066379782949, 0.96396893526626  
"13051", "TBL3", 61.5011947848361, -0.052671631268338, 0.227721818495495, -0.231298132152322, 0.817083197674254, 0.96396893526626  
"13052", "ZNF646", 29.1697436349602, -0.0725498803790326, 0.311824267319489, -0.23266271417131, 0.816023324468107, 0.96396893526626  
"13053", "BEAN1", 3.17015186912113, -0.205424491718469, 0.886389483328786, -0.23175420690576, 0.816728926310192, 0.96396893526626  
"13054", "AC009054.2", 8.73261650044047, -0.115755460115711, 0.500090061187566, -0.231469227444405, 0.816950289282447, 0.96396893526626  
"13055", "AC040977.1", 8.748528435603, -0.14332406839123, 0.617378837447433, -0.232149305576794, 0.816422050430125, 0.96396893526626  
"13056", "ALDOC", 5.39016195883053, -0.163047403131304, 0.69316807514373, -0.235220589317383, 0.814037526297819, 0.96396893526626  
"13057", "MY018A", 34.3036841737885, 0.0941471406291276, 0.402597468930574, 0.233849310774884, 0.815101966255226, 0.96396893526626  
"13058", "AC099850.1", 10.9275577896825, 0.110834666688303, 0.474635462621572, 0.233515351078333, 0.815361250581328, 0.96396893526626  
"13059", "RBBP8", 43.0182526925431, 0.0728057699190669, 0.313251352619324, 0.232419650578632, 0.816212087806317, 0.96396893526626  
"13060", "ZNF823", 25.5707130076399, 0.088216617299968, 0.378449618451037, 0.233100029697563, 0.815683731843704, 0.96396893526626  
"13061", "GTPBP3", 58.411824016746, -0.0565967042242279, 0.240695183742363, -0.235138499010468, 0.814101238358685, 0.96396893526626  
"13062", "NIPSNAP1", 66.72351996962, 0.0550086052243604, 0.236768363962101, 0.232330892116843, 0.816281020341932, 0.96396893526626  
"13063", "CCDC134", 4.98524928041817, -0.160302946074766, 0.684576987576731, -0.234163503862738, 0.814858047092396, 0.96396893526626  
"13064", "RABL2B", 73.5242383862932, -0.0598749219718218, 0.254687160530862, -0.235092031522203, 0.814137303325443, 0.96396893526626  
"13065", "CHST7", 245.593778685998, 0.0847380705347347, 0.360497877353881, 0.235058445161251, 0.814163371065169, 0.96396893526626  
"13066", "DIAPH2", 281.506926932527, -0.0503790832761819, 0.217128381875188, -0.232024403447824, 0.816519059740301, 0.96396893526626  
"13067", "GPRASP2", 32.5164720570108, 0.0808472265508303, 0.344446840415825, 0.234716121806284, 0.814429073866921, 0.96396893526626  
"13068", "PDZD8", 185.502751915364, 0.044217516417686, 0.191356795789171, 0.23107366652608, 0.817257572607245, 0.964036232150343  
"13069", "USP1", 228.660321923089, -0.039744034344196, 0.173546529163064, -

0.229010828023259,0.818860500211598,0.964187337278172  
"13070","ASH1L-  
AS1",12.210865033292,-0.108812296212179,0.475526508592649,-0.228824879  
887803,0.81900502842649,0.964187337278172  
"13071","AL096803.2",13.4006148133402,-0.104213224513567,0.45578971390  
9654,-0.228643212721172,0.819146235196784,0.964187337278172  
"13072","TRIM11",57.9211454572989,-0.0598586830080254,0.26180580291780  
2,-0.228637724377786,0.81915050128319,0.964187337278172  
"13073","ZNF621",95.4543808667715,0.0713267822407908,0.310180766313077  
,0.229952305194829,0.818128831509614,0.964187337278172  
"13074","SFXN1",104.248959225445,0.0530974454543031,0.230537746563403,  
0.230319963848957,0.817843148665389,0.964187337278172  
"13075","ARMT1",95.4220777367688,-0.0528059646960985,0.229311941781364  
, -0.230280046847478,0.817874164316029,0.964187337278172  
"13076","AC005076.1",8.9865316742623,-0.117429875462622,0.512279360257  
239,-0.229230151696244,0.818690038766352,0.964187337278172  
"13077","AC083843.3",17.7053036439706,-0.113276207157754,0.49540651276  
9817,-0.228653043990938,0.819138593369389,0.964187337278172  
"13078","PHYH",387.101039197787,0.0640581368169811,0.277647682635097,0  
.230717347283501,0.817534395895098,0.964187337278172  
"13079","TYSND1",69.5921720124949,-0.0518024015578283,0.2255420526645,  
-0.2296795694898,0.818340771712856,0.964187337278172  
"13080","AS3MT",24.0152615670035,-0.0789639785971231,0.342695305646563  
, -0.230420368461546,0.8177651351888,0.964187337278172  
"13081","LDLRAD3",17.7499772014467,0.0934868602029086,0.40899937022866  
6,0.228574582280265,0.81919958198717,0.964187337278172  
"13082","FADS1",31.4062242593071,0.104728339272767,0.457647662604246,0  
.228840542256482,0.818992854610946,0.964187337278172  
"13083","KRAS",333.444078010201,-0.0408494244429086,0.178139737826288,  
-0.229311129236885,0.818627104047907,0.964187337278172  
"13084","FAM216A",32.0036625044231,-0.0722670778958831,0.3146543147585  
09,-0.22967133932788,0.818347167496253,0.964187337278172  
"13085","NDUFAB1",61.3379995777217,-0.0659343900493593,0.2866663439349  
, -0.230003945159089,0.81808870410322,0.964187337278172  
"13086","ALDH1A2",2.53195514380946,0.280826778343176,1.22418984370876,  
0.229398062552449,0.818559541877387,0.964187337278172  
"13087","IQGAP1",970.891022781541,-0.0427290309050892,0.18576313516763  
3,-0.2300188940423,0.818077087996838,0.964187337278172  
"13088","AC009065.4",4.58824138479766,0.157361558392862,0.684224119513  
11,0.229985400843279,0.818103114114449,0.964187337278172  
"13089","ZNF597",8.7222307920035,0.130560682344519,0.568831778248778,0  
.229524241325735,0.81846148161877,0.964187337278172  
"13090","AC009053.2",5.42129442572065,0.157678415720662,0.689222908275  
993,0.228777096389723,0.819042169150604,0.964187337278172  
"13091","CCDC144A",53.5738905841085,-0.21434654295974,0.93653656581020  
6,-0.228871515309503,0.818968780460351,0.964187337278172  
"13092","AC103702.1",10.3587653830411,0.115309408252678,0.500149024472  
864,0.230550101290729,0.817664336625704,0.964187337278172  
"13093","AP000915.2",9.09984119061916,0.145978402349987,0.632602790239  
187,0.230758391525262,0.817502507593631,0.964187337278172

"13094", "ATG4D", 30.6426990209096, -0.0683184366449059, 0.297717394705039, -0.229474118274452, 0.818500434576975, 0.964187337278172  
"13095", "ZNF730", 2.5150612206419, 0.209001456657039, 0.913807221600873, 0.228715041549896, 0.819090403179835, 0.964187337278172  
"13096", "PPP1R13L", 16.0256277577618, -0.111444711918359, 0.485122071672445, -0.229725090705842, 0.81830539670525, 0.964187337278172  
"13097", "ZNF274", 32.7403216425263, 0.0774611519679157, 0.337722595704213, 0.229363249463351, 0.818586597486486, 0.964187337278172  
"13098", "COR02B", 104.023882215094, -0.0591264515079453, 0.258834808275924, -0.228433153569188, 0.819309517881734, 0.964243107203156  
"13099", "IFI16", 1329.41478516045, -0.049702262376466, 0.218145487579266, -0.227839974725152, 0.819770648543039, 0.96438306775782  
"13100", "B3GNT2", 27.2394939695986, 0.0860672168091352, 0.37854789296868, 0.227361500110783, 0.82014265482735, 0.96438306775782  
"13101", "AC097382.3", 35.2452130460942, 0.0717737306263966, 0.315529433314927, 0.227470793682692, 0.820057677271147, 0.96438306775782  
"13102", "AL355353.1", 4.37527871243211, -0.159693247945375, 0.700448374453238, -0.227987177598962, 0.819656208839611, 0.96438306775782  
"13103", "GNB2", 894.964431869772, -0.0384824386099708, 0.168994257246463, -0.227714475254904, 0.819868218434047, 0.96438306775782  
"13104", "RPS26", 3854.62614832647, -0.152770227014076, 0.670990318051721, -0.227678735302258, 0.819896005063777, 0.96438306775782  
"13105", "HSP90B1", 2025.70085743897, -0.0430400686263818, 0.188652004719031, -0.22814530219535, 0.819533282556861, 0.96438306775782  
"13106", "NEURL4", 21.8994324467077, -0.078114796774586, 0.343156467031241, -0.227636091053107, 0.819929159851262, 0.96438306775782  
"13107", "CHRNA1", 55.3247508187606, 0.0730653632917055, 0.320567195679813, 0.22792526583002, 0.819704340342942, 0.96438306775782  
"13108", "AP001033.2", 11.3605405920849, -0.102593801570264, 0.449961413008294, -0.228005776949528, 0.819641749448392, 0.96438306775782  
"13109", "POLRMT", 35.1602750668578, 0.0741218593687733, 0.326076208698549, 0.227314527682385, 0.82017917731463, 0.96438306775782  
"13110", "FDX2", 145.593127170322, 0.0675773157200136, 0.297045061145792, 0.227498533250637, 0.820036109635294, 0.96438306775782  
"13111", "WARS2-IT1", 10.9895727666086, 0.126590905158794, 0.557626559554378, 0.227017352365637, 0.820410249168632, 0.964507625910193  
"13112", "CCL4", 214.197062126612, -0.148716018536509, 0.655005977683067, -0.227045284475964, 0.820388529592661, 0.964507625910193  
"13113", "AC016747.1", 53.9636005437761, 0.0776630994046656, 0.342516827064441, 0.22674243502219, 0.820624027979088, 0.964511298490912  
"13114", "VGLL4", 510.814127378073, -0.044987489663567, 0.198452493337825, -0.226691481204949, 0.820663651703328, 0.964511298490912  
"13115", "KIF13A", 158.415909105486, 0.048588214419599, 0.214270829433734, 0.226760752025863, 0.820609784056998, 0.964511298490912  
"13116", "AL158163.1", 4.67599044513647, 0.155269630358648, 0.684929363588095, 0.226694369686893, 0.820661405492116, 0.964511298490912  
"13117", "AC017071.1", 4.28566955483581, 0.18142291548746, 0.800673365713871, 0.226587923685591, 0.820744183578466, 0.964532407552188  
"13118", "KYAT3", 119.346514148176, -0.0600908213529851, 0.265535260500986

, -0.226300722697285, 0.820967536338841, 0.964647806438237  
"13119", "MOB4", 259.844710494206, -0.0564199610439379, 0.249293549136521,  
-0.226319378256517, 0.820953027693362, 0.964647806438237  
"13120", "AATK", 7.16072780544829, -0.127536728634906, 0.564016412036121, -  
0.226122371465209, 0.821106245258472, 0.964737253861231  
"13121", "PPARGC1B", 5.31403362354583, -0.159012753738601, 0.7036057893512  
16, -0.22599693769607, 0.821203802085189, 0.964771402691027  
"13122", "AL353751.1", 2.91808281075273, 0.198405492225281, 0.878821505455  
505, 0.225763128227552, 0.821385656108793, 0.964771402691027  
"13123", "AC130650.2", 7.47294565873438, 0.144056261221259, 0.638067135600  
363, 0.225769755537895, 0.821380501339067, 0.964771402691027  
"13124", "MMP28", 101.228641010384, 0.0822480982370786, 0.36412158052262, 0  
.22588086682209, 0.821294079330628, 0.964771402691027  
"13125", "LRRIC14", 28.8775351700325, 0.0718048688990985, 0.318464213518316  
, 0.225472332058336, 0.821611847054768, 0.96496355217899  
"13126", "XPC", 213.779276163481, -0.0495601876022711, 0.220070183580096, -  
0.225201736991478, 0.821822338232257, 0.965098181846805  
"13127", "TMEM254-  
AS1", 12.5521419756308, -0.127039544704902, 0.564208946162744, -0.22516400  
2749184, 0.821851692059878, 0.965098181846805  
"13128", "GSPT1", 316.98177932527, -0.0359950709141596, 0.159938274832923,  
-0.225056015839619, 0.821935697486617, 0.965123307187401  
"13129", "TRPC1", 70.1339098773647, 0.0622431095205396, 0.276829326484399,  
0.224842903427168, 0.822101488377425, 0.965170940086672  
"13130", "PPP2CB", 350.769396875845, 0.0364147218566464, 0.161946163266649  
, 0.224856959387723, 0.822090553292219, 0.965170940086672  
"13131", "GCLC", 44.2568454141822, 0.0701910648889652, 0.312389827175042, 0  
.224690623006859, 0.82221995986129, 0.965216381573605  
"13132", "NDFIP2", 161.649394417481, -0.0542075722198923, 0.24140352233521  
1, -0.224551703701407, 0.822328040169066, 0.965216381573605  
"13133", "AC010487.2", 3.5332208216252, -0.20019652437373, 0.8912355560302  
21, -0.22462807169123, 0.822268624857401, 0.965216381573605  
"13134", "PEX10", 70.7770056334667, 0.0613345737078339, 0.278835428926047,  
0.219966931548362, 0.825896908755981, 0.965307373531829  
"13135", "AGTRAP", 399.706762817818, 0.0552035538994946, 0.24917502168002,  
0.221545295861897, 0.824667871696937, 0.965307373531829  
"13136", "MED18", 29.663933264688, 0.0657388520792965, 0.296819139144994, 0  
.221477807221803, 0.824720414821478, 0.965307373531829  
"13137", "SNHG12", 80.1540992828717, -0.0586127507586146, 0.26601101748216  
6, -0.220339560794861, 0.825606712086411, 0.965307373531829  
"13138", "JUN", 25224.4661579963, 0.0331571868979331, 0.147787249659155, 0.  
22435756111846, 0.822479090267215, 0.965307373531829  
"13139", "COLGALT2", 12.7442565665413, -0.175109320951194, 0.7953445961629  
72, -0.220167864088075, 0.825740423304422, 0.965307373531829  
"13140", "RAB29", 133.737038695473, -0.067908103635766, 0.306696946327118,  
-0.221417606040773, 0.82476728497439, 0.965307373531829  
"13141", "COQ8A", 110.113812984095, 0.054053171495988, 0.245162494613029, 0  
.220478958583396, 0.825498157824283, 0.965307373531829  
"13142", "C2orf81", 30.5106415613997, -0.0867380644080742, 0.3882057576535  
12, -0.223433225030864, 0.823198348016644, 0.965307373531829

"13143", "POLR1B", 18.8191814631749, 0.0812020740577989, 0.364734605818131, 0.222633314093286, 0.823820906202857, 0.965307373531829  
"13144", "TANK", 327.468211958015, 0.0323297815697761, 0.144854032001752, 0.223188689489741, 0.823388654418384, 0.965307373531829  
"13145", "TMBIM1", 346.838291315131, 0.031250556901676, 0.142019389858521, 0.220044297703347, 0.825836655487306, 0.965307373531829  
"13146", "TXNRD3", 32.3331700457986, 0.0626692714816842, 0.281682936879909, 0.222481603521488, 0.823938992691192, 0.965307373531829  
"13147", "LRRC34", 33.8253843613292, 0.0684970118140892, 0.308453727023661, 0.222065761613686, 0.824262690698275, 0.965307373531829  
"13148", "APOD", 14361.7590903856, 0.0811470307011677, 0.363689131812148, 0.22312195664698, 0.823440590134487, 0.965307373531829  
"13149", "LYAR", 130.89409444397, -0.0457852963921614, 0.205847247494168, -0.222423651273056, 0.8239841018557, 0.965307373531829  
"13150", "PPAT", 44.136813809078, 0.0693089275741722, 0.313078777749971, 0.221378555494181, 0.824797688451048, 0.965307373531829  
"13151", "AC114956.3", 2.40586837192988, -0.239265831919052, 1.08017545252152, -0.221506451901419, 0.824698113476518, 0.965307373531829  
"13152", "SMN1", 22.0028816675987, -0.0941863569627937, 0.424027694922852, -0.222123125660295, 0.824218035826233, 0.965307373531829  
"13153", "FAF2", 195.052709347733, 0.0336941907273614, 0.151779143930245, 0.221994866059112, 0.824317879918512, 0.965307373531829  
"13154", "AL590062.1", 13.7439881622904, -0.103532455387396, 0.462619034428789, -0.223796358736581, 0.822915763421862, 0.965307373531829  
"13155", "HIST1H4J", 6.6099986968959, 0.164536152268116, 0.743941595462549, 0.221168104151799, 0.824961543497875, 0.965307373531829  
"13156", "APOM", 23.6831239466451, 0.092066602701511, 0.411534141156844, 0.223715588803172, 0.822978615252656, 0.965307373531829  
"13157", "PAPOLB", 2.89186267687391, 0.216706492686552, 0.982227165901662, 0.220627671693055, 0.825382353052032, 0.965307373531829  
"13158", "EPHA1-AS1", 9.31096700890023, 0.119933616257201, 0.535336201710571, 0.224034197339866, 0.822730693830212, 0.965307373531829  
"13159", "AC064807.4", 3.3160001961518, -0.194287626570396, 0.869649559457604, -0.223409101352931, 0.823217121473151, 0.965307373531829  
"13160", "LINC01410", 2.39905091006841, 0.215289914773488, 0.979183845819894, 0.219866693770076, 0.825974976119677, 0.965307373531829  
"13161", "FBXW2", 172.262244681174, -0.0398751496879302, 0.177957560588866, -0.224071118731806, 0.82270196503432, 0.965307373531829  
"13162", "RPL12", 14958.7238453163, -0.0537277875602562, 0.242487366839733, -0.221569429618025, 0.824649082607646, 0.965307373531829  
"13163", "MED27", 66.2950915487284, -0.0585429631584013, 0.265602370137591, -0.220415816048908, 0.82554732885999, 0.965307373531829  
"13164", "PCBD1", 693.757807336437, -0.0817680438156272, 0.369513870260684, -0.221285452039842, 0.824870176811696, 0.965307373531829  
"13165", "ZMIZ1", 359.523849632504, 0.0641268956674234, 0.286952572947545, 0.223475590438933, 0.823165378780357, 0.965307373531829  
"13166", "SMC3", 477.537765653048, -0.0396431170339178, 0.180075383708296, -0.220147341727372, 0.825756405718857, 0.965307373531829  
"13167", "DDB2", 78.2547404638107, 0.0649336436860792, 0.292742086863898, 0

.221811781085882,0.824460407920158,0.965307373531829  
"13168","AP000759.1",3.43851935906373,-0.204540425681086,0.92725033083  
7022,-0.220588139878525,0.825413136603438,0.965307373531829  
"13169","TIMM8B",481.60465997001,-0.0551301305884745,0.250722083120852  
, -0.219885420152244,0.825960391474897,0.965307373531829  
"13170","USP28",57.3688540895572,0.0579844619724504,0.263626204165891,  
0.219949538612493,0.825910454629641,0.965307373531829  
"13171","OGF0D2",34.3503688951449,0.064190378200854,0.287202676183308,  
0.223502019737046,0.823144811361885,0.965307373531829  
"13172","MTMR6",100.70938438747,0.0435368224319622,0.197423958594061,0  
.220524513549451,0.825462683194696,0.965307373531829  
"13173","NUBPL",61.9699189058584,-0.0506608647723194,0.229987204316982  
, -0.220276884197851,0.825655521779171,0.965307373531829  
"13174","TRAPPC6B",131.369898160539,0.0395020814648601,0.1795979361751  
15,0.219947301768234,0.825912196720531,0.965307373531829  
"13175","VASH1-  
AS1",8.54615155716964,-0.114447909820194,0.516887097999603,-0.22141761  
7625042,0.824767275955296,0.965307373531829  
"13176","SNURF",2.5549997280242,-0.205568770569352,0.925863952708266,-  
0.22202913286346,0.824291204537899,0.965307373531829  
"13177","TMEM62",25.1716802537271,0.085812786868591,0.382985680092298,  
0.224062651240408,0.822708553628192,0.965307373531829  
"13178","ZNF689",56.6493461058516,0.060467300998561,0.271558472070102,  
0.222667702235972,0.823794140165032,0.965307373531829  
"13179","SLC25A11",229.665625425214,-0.0528722803064868,0.240402885151  
979,-0.219931970754268,0.825924136788003,0.965307373531829  
"13180","TMEM199",60.3133694329321,-0.0686920999329777,0.3110864671237  
19,-0.220813526760259,0.825237630711191,0.965307373531829  
"13181","WBP2",223.394437778729,-0.0342922324706712,0.155507600316221,  
-0.220518047998547,0.825467718036224,0.965307373531829  
"13182","SERPINB2",3.05642676718178,0.240039116308939,1.07764820528347  
,0.222743484499004,0.823735155704713,0.965307373531829  
"13183","MVB12A",385.67733916071,-0.0520806268048775,0.235198238076644  
, -0.221432895206919,0.824755381401962,0.965307373531829  
"13184","KMT2B",118.468324925866,-0.0468393010092555,0.209068197755309  
, -0.224038383226872,0.822727436750019,0.965307373531829  
"13185","TIMM50",114.291410022986,-0.0505839268806923,0.22694514107126  
, -0.222890548094216,0.823620692885316,0.965307373531829  
"13186","EGLN2",229.88263839829,0.0517412806821978,0.233108683679843,0  
.221962047339517,0.824343428211446,0.965307373531829  
"13187","FASTKD5",43.9461726131868,0.0542237144758323,0.24637669299022  
6,0.220084594113711,0.825805272784997,0.965307373531829  
"13188","BACH1",168.09975916596,-0.0693035728776761,0.309817360412506,  
-0.223691702703173,0.822997202648097,0.965307373531829  
"13189","GRIPAP1",78.9004892835871,0.0509060466143514,0.22811164488832  
1,0.2231628579912,0.823408758031487,0.965307373531829  
"13190","SLC9A6",32.1033295090856,0.065355836959156,0.295844290168107,  
0.220912957022151,0.825160208409543,0.965307373531829  
"13191","KIAA2013",182.281820189961,-0.0415156417446959,0.188892991817  
, -0.219783917578669,0.826039445316508,0.965309532981122



"13192", "WDPCP", 50.6515711405028, -0.0584014025075667, 0.265965483655743, -0.219582637960493, 0.826196214311292, 0.965327700771  
"13193", "GPBP1", 470.623462439142, 0.0299866041350817, 0.136699202724258, 0.21936195338, 0.82636810505184, 0.965327700771  
"13194", "AL135925.1", 66.6653424758586, -0.0680189221648296, 0.309959018877923, -0.219444887943779, 0.82630350652377, 0.965327700771  
"13195", "MAP3K10", 20.5806017318975, 0.0848276416797794, 0.386692982043246, 0.219366902475341, 0.82636425012098, 0.965327700771  
"13196", "U2AF1", 43.8743741839959, 0.0717948524649377, 0.327235665239224, 0.219398006059188, 0.826340023129416, 0.965327700771  
"13197", "SHC3", 54.7685273291688, 0.0726193868249702, 0.331350119023117, 0.219162096694173, 0.826523780171091, 0.965436392463239  
"13198", "LINC01048", 35.8127514566797, 0.102178103276624, 0.466415241035913, 0.219071107217007, 0.826594657205704, 0.965446025217906  
"13199", "AC009630.1", 6.19129459727448, -0.141943045397643, 0.64845339891831, -0.218894751163952, 0.826732035290075, 0.965533322524169  
"13200", "TMEM167B", 174.901247635729, 0.0368762047515808, 0.168704021682717, 0.218585214411391, 0.826973171482283, 0.965629774320172  
"13201", "ARHGEF2", 120.984776993081, -0.0519297056098297, 0.237598582718706, -0.21856067075665, 0.826992292247715, 0.965629774320172  
"13202", "HSD17B4", 203.282826848186, -0.040114659418897, 0.183618767362467, -0.218467098952417, 0.827065190421617, 0.965629774320172  
"13203", "PTBP1", 346.892532378879, -0.0446455766816316, 0.204340063331087, -0.218486653834953, 0.8270499558457, 0.965629774320172  
"13204", "RNF19A", 433.585085331853, 0.04197109959934, 0.192285460276827, 0.218274951933004, 0.82721488940474, 0.965658274909054  
"13205", "TNKS2-AS1", 3.83260919230552, 0.211398779776965, 0.96815277374643, 0.218352707867501, 0.827154310116342, 0.965658274909054  
"13206", "C2orf42", 24.6713753436909, 0.0716858993019928, 0.328700307401733, 0.218088932951253, 0.827359820103257, 0.96575432582854  
"13207", "DDX20", 34.075811697134, -0.0683466991739444, 0.314588621420981, -0.217257378430364, 0.828007770849356, 0.965802449100531  
"13208", "PTPN7", 5.64425848015085, -0.139871251069643, 0.64613619921666, -0.216473324415526, 0.828618816240951, 0.965802449100531  
"13209", "GOLGA4", 862.212990940937, -0.0440705866652499, 0.202319640655282, -0.217826536872605, 0.82756426755245, 0.965802449100531  
"13210", "ADAMTS9", 3.23503102857734, -0.191096985682847, 0.877977465014556, -0.217655911794591, 0.827697217357185, 0.965802449100531  
"13211", "SEC24B-AS1", 9.16104525364908, 0.124843683389805, 0.5768369314876, 0.216428034640304, 0.828654115588948, 0.965802449100531  
"13212", "ADAM19", 32.3468091245495, 0.101414551942928, 0.468012108565765, 0.216692154084892, 0.828448262871384, 0.965802449100531  
"13213", "HLA-DRB1", 275.427214075852, -0.091432547728815, 0.421608541306045, -0.216865975830514, 0.828312793931471, 0.965802449100531  
"13214", "AC072061.1", 4.2378422243508, 0.174195722559606, 0.802830599997495, 0.216976934561474, 0.828226320300168, 0.965802449100531  
"13215", "TMEM168", 96.3168778951397, 0.0434405467531464, 0.20046047212987

1,0.216703803456089,0.828439183709867,0.965802449100531  
"13216","KLF14",8.94995180367999,0.182805828692947,0.842511135347348,0  
.216977344302494,0.828226000979953,0.965802449100531  
"13217","MTMR9",109.3739128537,-0.0482021567014505,0.221992270914506,-  
0.217134391674448,0.828103612589849,0.965802449100531  
"13218","ZNF79",5.91810985685776,-0.143971341627761,0.661737238355578,  
-0.217565724403739,0.827767492703111,0.965802449100531  
"13219","MSS51",7.32831987035747,0.119198292078392,0.548909896031355,0  
.217154569338613,0.828087888262231,0.965802449100531  
"13220","PIK3C3",109.891392708736,0.0440957646604355,0.203540045536265  
,0.21664417212965,0.828485658772724,0.965802449100531  
"13221","PDE4C",2.81561459958778,0.238847824420897,1.10140874882286,0.  
216856661685472,0.828320052832533,0.965802449100531  
"13222","ZNF226",88.4789289074407,0.0582110800699514,0.268421053537678  
,0.216864807371678,0.828313704559291,0.965802449100531  
"13223","IGLC2",199.976312982581,0.188003626674135,0.868402586031733,0  
.216493628298874,0.828602991283722,0.965802449100531  
"13224","LRRC75B",66.4240597841681,0.0510847189861951,0.23602913375297  
4,0.2164339553085,0.828649500935498,0.965802449100531  
"13225","MIATNB",20.1684693590522,-0.0900383972224091,0.41576490717022  
5,-0.216560839237798,0.828550607208269,0.965802449100531  
"13226","MECP2",228.301145919262,0.0412738644846944,0.18970260624287,0  
.217571415080364,0.827763058403138,0.965802449100531  
"13227","ZBTB8A",158.738375891835,0.0372105619864351,0.174133268446489  
,0.213690136976152,0.830788703248452,0.965892817431176  
"13228","ATP8B2",153.933921307345,-0.0555059596248456,0.25973930250228  
, -0.213698732113744,0.830782000131474,0.965892817431176  
"13229","RASAL2-  
AS1",7.44259068867662,-0.167165770113773,0.784487053037022,-0.21308926  
5739462,0.83125733707685,0.965892817431176  
"13230","HSD11B1-  
AS1",18.5659573536198,-0.112310693497342,0.522012019336798,-0.21514963  
1305481,0.829650659651324,0.965892817431176  
"13231","TSGA10",23.4186004051638,0.0690405349254054,0.324327301514273  
,0.212873028582723,0.831426000291552,0.965892817431176  
"13232","RBM45",32.5096278511368,0.0698849320858021,0.32800236495337,0  
.213062281108056,0.83127838444453,0.965892817431176  
"13233","UBA3",121.545269195868,-0.0449776565758319,0.211213355152776,  
-0.212948923344825,0.831366802112818,0.965892817431176  
"13234","MAP9",82.5109528748733,0.0485895486061547,0.226685945567672,0  
.214347424514897,0.830276137912451,0.965892817431176  
"13235","PCDHB10",21.1429813702553,-0.0954956128200258,0.4470408084472  
87,-0.213617215734089,0.830845573062032,0.965892817431176  
"13236","PWWP2A",115.013785013413,-0.0455066346101703,0.21261895691901  
5,-0.21402905587343,0.830524398835827,0.965892817431176  
"13237","LCP2",21.1235100499352,0.0980693424502717,0.454429410289082,0  
.215807648514399,0.829137686148523,0.965892817431176  
"13238","VEGFA",302.460655177233,0.0775291937858022,0.358681178202094,  
0.216150716841126,0.828870267669221,0.965892817431176  
"13239","SUPT3H",36.6069672687013,-0.0670460805151232,0.31478304738689

4,-0.212991395412466,0.831333674169648,0.965892817431176  
"13240","RUNX2",15.7867279269205,-0.10215692242351,0.475542672694365,-  
0.2148217779168,0.829906272947142,0.965892817431176  
"13241","RPA3",214.660758797198,-0.059291609089446,0.27821356921305,-0  
.213115446730932,0.831236916644789,0.965892817431176  
"13242","SNHG26",53.5196773539706,0.0796039120639342,0.370308751867222  
,0.214966326511443,0.829793572356055,0.965892817431176  
"13243","ZNF777",39.9947461051462,-0.0563775161835057,0.26194729516553  
8,-0.215224654821794,0.829592169551327,0.965892817431176  
"13244","RARRES2",917.690221428903,-0.0763067020212315,0.3569795076560  
76,-0.213756533315485,0.830736922846363,0.965892817431176  
"13245","GIMAP5",3.00678976290565,-0.202186270697875,0.942902452517205  
, -0.21442967950514,0.830211998984435,0.965892817431176  
"13246","TM2D2",236.043186978827,-0.0433067942526311,0.201917585424526  
, -0.214477575896026,0.830174651945755,0.965892817431176  
"13247","DLG5-  
AS1",4.17650554127841,0.158116947951773,0.739041773515701,0.2139485934  
59872,0.830587145361054,0.965892817431176  
"13248","API5",149.258418286355,0.0397574581851815,0.183979625891473,0  
.216097070491022,0.828912083178817,0.965892817431176  
"13249","RCOR2",2.45070586516745,0.25086730951693,1.17171017315346,0.2  
1410355159908,0.830466306240665,0.965892817431176  
"13250","CCDC82",310.15410561721,-0.0349093825909749,0.163483018269227  
, -0.213535221948775,0.830909519428112,0.965892817431176  
"13251","CD69",48.2972051180048,0.108219066778437,0.507884343639024,0.  
213078170520162,0.831265991068126,0.965892817431176  
"13252","AC025159.1",37.1619151401206,-0.0817737603404659,0.3827484260  
99219,-0.213648848079829,0.830820903521456,0.965892817431176  
"13253","LINC00571",2.98959002071004,0.194815030177769,0.9096923150503  
57,0.214154859785734,0.830426296085052,0.965892817431176  
"13254","ACOT1",3.15799168524401,-0.193333981276272,0.902810014169231,  
-0.21414691711653,0.83043248975464,0.965892817431176  
"13255","SPTLC2",96.421665594803,-0.0435918026084266,0.204037348663804  
, -0.213646192199123,0.830822974792256,0.965892817431176  
"13256","CHST14",134.373785915116,-0.0486594709323766,0.22796461636018  
6,-0.213451858052805,0.830974535481516,0.965892817431176  
"13257","RPAP1",39.0229007201362,0.059537983116244,0.279267441809892,0  
.213193427527344,0.831176094506662,0.965892817431176  
"13258","RNF111",65.465454951575,0.0500962981767264,0.234315855577733,  
0.213798157419643,0.830704461900632,0.965892817431176  
"13259","AC116667.1",7.05635266042373,0.137816120764162,0.642818930466  
264,0.214393376163017,0.830240306640552,0.965892817431176  
"13260","CMC2",129.097246176625,-0.0587263016974375,0.275701917982131,  
-0.213006504007142,0.831321889633963,0.965892817431176  
"13261","TRPV1",28.0935516995148,0.0797229085699804,0.371194222766589,  
0.21477410929456,0.829943439637354,0.965892817431176  
"13262","HEATR6",43.6106449125856,0.0591291676763341,0.27606034136518,  
0.214189286965042,0.830399449995834,0.965892817431176  
"13263","CELF4",4.99135019079013,0.164185319270652,0.76222920387147,0.  
215401507101449,0.829454295087244,0.965892817431176

"13264", "AC005253.1", 9.30408995484017, 0.127621551013923, 0.592489917078404, 0.2153986883747, 0.829456492532243, 0.965892817431176  
"13265", "ZSCAN5A", 17.6017049852709, 0.0797906937177372, 0.372714530376286, 0.214079911607369, 0.830484740868702, 0.965892817431176  
"13266", "CRNKL1", 133.51805044644, 0.0533322159467194, 0.247133682304607, 0.215803104819133, 0.829141228048441, 0.965892817431176  
"13267", "RBM38", 35.6863793627244, -0.0689363706328291, 0.323743382236595, -0.212935227143731, 0.831377485126628, 0.965892817431176  
"13268", "MIS18A", 75.9653663806261, -0.0560935404386202, 0.260209026007712, -0.215571078756344, 0.829322101547989, 0.965892817431176  
"13269", "RAB9A", 322.003529997924, -0.0530394648734366, 0.248673088944232, -0.213289926540187, 0.83110083024426, 0.965892817431176  
"13270", "KIF3A", 97.3829121994168, 0.0445128067610768, 0.209254125133897, 0.212721286773172, 0.831544362298828, 0.965957524102218  
"13271", "GAR1", 97.7827137815832, 0.0468099733779468, 0.220593096714851, 0.21220053607777, 0.831950588533495, 0.966106109962696  
"13272", "ZNF827", 97.2083862510013, -0.0580182773724081, 0.273283584164044, -0.21230063104552, 0.831872503148711, 0.966106109962696  
"13273", "REPS1", 62.5302802323655, -0.0488628862123724, 0.230417698994321, -0.212062208873879, 0.832058502112063, 0.966106109962696  
"13274", "NCOR2", 349.671796476566, -0.04859443038222, 0.228943869849258, -0.212254778493156, 0.831908273114618, 0.966106109962696  
"13275", "PEX11G", 49.3718469618112, 0.07061281062468, 0.332915160068639, 0.212104521194293, 0.832025492550072, 0.966106109962696  
"13276", "AP1M1", 174.450958966269, 0.0454023706592218, 0.214167240493578, 0.211994937015511, 0.832110984234493, 0.966106109962696  
"13277", "ZBTB46", 7.43934953677517, -0.132202413212777, 0.623293097022647, -0.212103124267352, 0.832026582344863, 0.966106109962696  
"13278", "WBP4", 288.735762777561, 0.0362961655695812, 0.171418125656234, 0.211740534617503, 0.832309462963077, 0.966118676454874  
"13279", "DDX24", 859.612229138358, 0.0367321535929658, 0.173477578026777, 0.211740064686032, 0.832309829602383, 0.966118676454874  
"13280", "PIGA", 22.5729275414192, 0.0828534857591054, 0.391179274849624, 0.211804385063487, 0.832259647351163, 0.966118676454874  
"13281", "TMEM79", 18.3766289271394, 0.0792104756474414, 0.375062838277796, 0.211192545790882, 0.832737027176507, 0.966126132933502  
"13282", "AL133243.3", 34.5916913216954, -0.0749470363088985, 0.354306430566282, -0.211531685126663, 0.832472410383901, 0.966126132933502  
"13283", "TTC31", 49.2780819256857, -0.0507437210251619, 0.240422399726755, -0.211060704338835, 0.832839902880335, 0.966126132933502  
"13284", "CDC23", 57.7095074239494, -0.0482247390684749, 0.228448297245501, -0.211096951257423, 0.832811619174176, 0.966126132933502  
"13285", "AFDN", 90.0867042005806, 0.0528256367962516, 0.250243714273174, 0.211096758013212, 0.832811769963316, 0.966126132933502  
"13286", "CDK20", 15.0902633349487, 0.0844787359459534, 0.39972578448826, 0.211341722811565, 0.83262062800653, 0.966126132933502  
"13287", "EARS2", 18.0654988852345, -0.0775848137636839, 0.367138775644966, -0.211322853674031, 0.832635350929015, 0.966126132933502  
"13288", "AC002553.2", 3.7430169896537, 0.161318350642772, 0.764509683201397, 0.211008904383329, 0.832880323097847, 0.966126132933502

"13289", "ZNF337-  
AS1", 21.6783855331483, -0.0824456618914501, 0.390256891771115, -0.2112599  
76773977, 0.832684411980127, 0.966126132933502  
"13290", "FBX05", 33.8873932289887, -0.0749030062054157, 0.355161975600394  
, -0.210898157323271, 0.832966742033426, 0.966153674074135  
"13291", "CHCHD7", 90.0141235280293, -0.0436116135022531, 0.20700118039207  
2, -0.210682921805809, 0.833134701919641, 0.966271405356971  
"13292", "AC104938.1", 2.42622661611631, 0.244925490212932, 1.162947984720  
77, 0.210607433376945, 0.833193611417766, 0.966271405356971  
"13293", "TDP2", 119.654260635231, -0.0467580924742389, 0.222267707944709,  
-0.210368356728952, 0.833380187717918, 0.966292018882272  
"13294", "AC025259.3", 5.30416643787321, -0.262550300267067, 1.24808123739  
973, -0.210363149769055, 0.833384251353126, 0.966292018882272  
"13295", "XPNPEP3", 66.4844731480163, -0.0671739988257142, 0.3193535311685  
47, -0.210343685820281, 0.833399441520585, 0.966292018882272  
"13296", "PIIE", 197.418404403817, -0.0494876035493981, 0.235451754740877,  
-0.210181502379802, 0.833526016076618, 0.966300355637347  
"13297", "LOXL4", 63.7699584388045, 0.0827866657450886, 0.393896163557011,  
0.210173831086594, 0.833532003172871, 0.966300355637347  
"13298", "UBE2J1", 281.28989795603, 0.0358315231958118, 0.170650484873223,  
0.209970239594872, 0.833690900620443, 0.966364701931941  
"13299", "ZNF552", 15.5311069964084, 0.0973402905795728, 0.463653099290266  
, 0.209942068172467, 0.833712888160421, 0.966364701931941  
"13300", "EMC2", 271.355166170558, 0.0507853412654149, 0.242286744659361, 0  
.209608418061895, 0.833973308935187, 0.966409945892116  
"13301", "ERBB3", 3.48498506751098, -0.178357952273814, 0.851063102659643,  
-0.209570772973744, 0.834002692844815, 0.966409945892116  
"13302", "FAM106A", 30.5090150941108, -0.126497619568649, 0.60301265190375  
2, -0.209776062192539, 0.833842456964284, 0.966409945892116  
"13303", "SLC9A3R1", 32.207471006418, 0.0830042930809946, 0.39599615783873  
2, 0.20960883442409, 0.833972983944573, 0.966409945892116  
"13304", "AL136454.1", 17.1710206177335, 0.100545348502981, 0.481493684365  
384, 0.208819662163381, 0.834589021511292, 0.96644360302787  
"13305", "PREB", 117.084983878115, 0.0534555938383786, 0.255629920584785, 0  
.209113212240931, 0.834359860834093, 0.96644360302787  
"13306", "AC012360.3", 12.4468392646701, -0.0913247501301437, 0.4373565937  
95501, -0.208810731164705, 0.834595993740318, 0.96644360302787  
"13307", "AC109322.1", 3.58442535206086, -0.167339374287736, 0.80130231903  
682, -0.208834256824417, 0.834577627816919, 0.96644360302787  
"13308", "SLC35F2", 29.0187860972418, -0.0939285796830214, 0.4497857263960  
64, -0.208829614126775, 0.834581252253478, 0.96644360302787  
"13309", "FBRSL1", 88.8906624362268, -0.0447526457672381, 0.21378021833633  
8, -0.209339508189805, 0.834183211878531, 0.96644360302787  
"13310", "ZNF774", 4.09498907666089, 0.174449084066508, 0.833785203029175,  
0.209225449711422, 0.834272246059691, 0.96644360302787  
"13311", "RAB3D", 35.9706557206752, 0.0653664573426101, 0.312521973677229,  
0.209157956394197, 0.834324932422497, 0.96644360302787  
"13312", "SHROOM4", 4.8122498471254, -0.1546130934922, 0.7387324542847, -0.  
209295114348142, 0.834217865510449, 0.96644360302787  
"13313", "STK17B", 113.281811117259, 0.0816983150274013, 0.391993233211546

,0.208417666698117,0.83490286316635,0.966726330331952  
"13314","AL034417.2",10.2933910887269,-0.120128352804287,0.57928709098  
376,-0.207372742590003,0.835718768172142,0.96673841193759  
"13315","R060",316.143308149003,0.0265375265478046,0.128375517675171,0  
.206717971061683,0.836230121657605,0.96673841193759  
"13316","ARID4B",565.395277946346,-0.0544300734501199,0.26311577029151  
5,-0.206867392972359,0.836113422308759,0.96673841193759  
"13317","IFT172",33.0581186677676,0.0615119607431792,0.297864392893498  
,0.206509949529862,0.836392593640516,0.96673841193759  
"13318","LINC02614",27.7833917607978,0.0665358222782538,0.319512439548  
62,0.208241727214909,0.83504022905767,0.96673841193759  
"13319","KIAA0232",150.096859721394,-0.0474744479762364,0.229661321788  
962,-0.20671503414868,0.836232415439234,0.96673841193759  
"13320","TAPT1",89.6148027418919,-0.0521430047767249,0.252309407044064  
, -0.206662943675415,0.836273099262692,0.96673841193759  
"13321","OSTC",1091.91369105162,-0.0582834025120112,0.280315666881615,  
-0.207920603084329,0.835290961776266,0.96673841193759  
"13322","MGARP",2.52293875936804,0.226484432383213,1.09594466451742,0.  
206656813720556,0.836277886923201,0.96673841193759  
"13323","AC010273.3",3.3021564062616,0.181620061771008,0.8804995125003  
45,0.206269349605048,0.83658051917522,0.96673841193759  
"13324","AP3B1",191.148534487541,-0.043244393661815,0.20832998711935,-  
0.207576423633343,0.835559714604065,0.96673841193759  
"13325","ARHGEF37",5.74075537901338,-0.128279974087872,0.6222480191279  
98,-0.206155696996256,0.836669293133921,0.96673841193759  
"13326","STX7",267.888684913017,0.0338841423273102,0.163649661245044,0  
.20705293289042,0.835968519614647,0.96673841193759  
"13327","NUP188",50.808348970815,0.0518342651047582,0.249341196382697,  
0.207884881667132,0.835318853982477,0.96673841193759  
"13328","AC127035.1",3.30902698955998,-0.205196098193542,0.99524914594  
3355,-0.206175608419182,0.836653740187632,0.96673841193759  
"13329","C2CD3",31.6273432335804,0.0606187872795336,0.293234934383164,  
0.206724302501844,0.836225176694238,0.96673841193759  
"13330","PCED1B-  
AS1",14.4518520253166,-0.117305715619308,0.565488476629938,-0.20744138  
9996837,0.835665160984367,0.96673841193759  
"13331","DHRS4L2",265.118590452489,-0.0568171808398386,0.2752186487307  
02,-0.206443789699125,0.836444268210844,0.96673841193759  
"13332","PSMA6",538.396428313899,-0.0521449047041277,0.252248597782342  
, -0.206720295623296,0.836228306134361,0.96673841193759  
"13333","KTN1-  
AS1",12.0824833929533,0.102325436082683,0.494376543486833,0.2069787440  
98543,0.836026458801291,0.96673841193759  
"13334","DUOX1",6.27045036351684,-0.179173038571277,0.865835103686857,  
-0.206936676288974,0.836059312874462,0.96673841193759  
"13335","PSMA4",750.254649375616,-0.0461933422673,0.223886769913239,-0  
.206324573288546,0.836537384752936,0.96673841193759  
"13336","PRKCB",6.44521165934462,-0.135975546074716,0.653951901180796,  
-0.207928971273261,0.835284427707916,0.96673841193759  
"13337","ATPAF2",56.0525982298642,-0.0612270817429854,0.29403109827401

7,-0.208233353894852,0.835046766707045,0.96673841193759  
"13338","SEH1L",53.3560561661535,0.067057578466043,0.322691089515114,0  
.207807344686232,0.835379397574761,0.96673841193759  
"13339","ZIK1",4.69557937885192,0.173881179082074,0.838382776935996,0.  
20740070510221,0.835696931979981,0.96673841193759  
"13340","SERPIND1",4.40622479475483,-0.248735823850227,1.2041053255422  
2,-0.206573144868551,0.836343235165432,0.96673841193759  
"13341","MOSPD1",34.3200271848381,-0.0661737519441325,0.32054651638076  
1,-0.206440402757421,0.836446913622901,0.96673841193759  
"13342","DHX29",299.518081817834,-0.0366697222654768,0.178152665442448  
, -0.205833138529846,0.836921254610253,0.966957063395071  
"13343","PER3",220.308860938503,-0.173485949363808,0.869263031959783,-  
0.199578197835789,0.841810480336272,0.967177857579687  
"13344","SLC25A34",12.8401895705641,0.115350614138794,0.56445166384490  
3,0.20435871045725,0.838073193551718,0.967177857579687  
"13345","GNL2",106.331555351754,-0.0395174747076427,0.193334232634972,  
-0.204399780468543,0.838041101723912,0.967177857579687  
"13346","ARMH1",5.6320178201945,-0.125140347252644,0.622985732348783,-  
0.20087193133756,0.840798715905488,0.967177857579687  
"13347","ATG4C",78.2274760425956,-0.0528882535331234,0.257959786447264  
, -0.205025187303509,0.837552446388635,0.967177857579687  
"13348","RTCA",146.213970057173,0.037749675712898,0.18888493911655,0.1  
99855403450694,0.841593669604973,0.967177857579687  
"13349","CTTNBP2NL",139.152630021902,-0.0449783138595027,0.22421901406  
3771,-0.200599909188389,0.841011429085023,0.967177857579687  
"13350","CADM3-  
AS1",3.57268380057008,-0.194943098952048,0.974418184569126,-0.20006102  
3120426,0.841432856122244,0.967177857579687  
"13351","CD48",23.6521044884469,0.0807958779383404,0.395357881218704,0  
.204361369221436,0.838071116003291,0.967177857579687  
"13352","ATP2B4",574.073705015306,-0.041037548370831,0.204426479396367  
, -0.200744778719505,0.840898144001615,0.967177857579687  
"13353","STAMPB",137.07432152774,-0.0381059546467542,0.186800578038555  
, -0.203992701986657,0.838359201974116,0.967177857579687  
"13354","LMAN2L",58.677977673384,0.0457574538832992,0.226968709573793,  
0.201602476258616,0.840227509204261,0.967177857579687  
"13355","ABCB11",2.36114753040158,0.225598698995829,1.12651645131156,0  
.200262232063431,0.84127549863705,0.967177857579687  
"13356","TLK1",253.284614785328,0.0321445668372725,0.160597061639589,0  
.200156631192987,0.841358084073658,0.967177857579687  
"13357","PJKV",20.6603804412829,0.0865897626466996,0.429190280661497,0  
.201751452789755,0.840111036070856,0.967177857579687  
"13358","DNAH7",2.94564013687381,-0.160494253816594,0.784550681768774,  
-0.204568369572707,0.837909370166508,0.967177857579687  
"13359","GOLGB1",654.623233641013,-0.0496799941621966,0.24631366474187  
8,-0.201694023814141,0.840155934894424,0.967177857579687  
"13360","SLC35G2",51.7435409916765,0.0613777586768617,0.30289014439106  
6,0.20264032955003,0.839416165482016,0.967177857579687  
"13361","GYG1",160.573618767005,0.0430565124573339,0.213087490111999,0  
.202060254380506,0.839869619337018,0.967177857579687

"13362","EIF4G1",334.199393602882,0.051082638120297,0.250927431622851,  
0.203575343635906,0.838685362569357,0.967177857579687  
"13363","TACC3",6.36778563809268,-0.120691979278892,0.594897586910255,  
-0.20287858269141,0.839229934698862,0.967177857579687  
"13364","ENOPH1",115.430828976627,-0.04261802534858,0.20945681926044,-  
0.203469266357896,0.83876826512162,0.967177857579687  
"13365","ZSWIM6",73.4358944098405,0.0502398246096667,0.247248731615261  
,0.203195479634832,0.838982245867343,0.967177857579687  
"13366","GFM2",39.0172098926027,0.0518680215898365,0.257915612848879,0  
.201104621069325,0.840616768721982,0.967177857579687  
"13367","PCDHGA3",8.52664271074115,0.114258940471716,0.568271401430405  
,0.201064034164156,0.840648504245706,0.967177857579687  
"13368","UNC5CL",3.54699182839562,-0.175656601163498,0.857633752917537  
, -0.204815401173218,0.837716353695613,0.967177857579687  
"13369","RPL7L1",488.104037523206,0.0329096437237676,0.164792174518433  
,0.199703922955919,0.841712145504316,0.967177857579687  
"13370","ELOVL5",162.50777915016,-0.05189489839077,0.255888341632016,-  
0.202802902468289,0.839289089238576,0.967177857579687  
"13371","HIVEP2",197.308752379681,0.0615576970048091,0.306942485356684  
,0.200551243120599,0.841049485718073,0.967177857579687  
"13372","LINC00997",11.0100860781631,0.111233372157055,0.5441719598904  
14,0.204408496497055,0.838034291113098,0.967177857579687  
"13373","ARPC1A",499.771523552872,-0.0520418410100624,0.25527627224724  
9,-0.203864779722485,0.838459168755966,0.967177857579687  
"13374","CNPY4",231.988076825075,-0.0560682308030348,0.280325074561674  
, -0.200011472005153,0.841471609044486,0.967177857579687  
"13375","ATP6V0E2",49.2751915015888,0.0685808991011504,0.3387695707918  
96,0.202441142930394,0.839571866784359,0.967177857579687  
"13376","POLR1E",122.194354658845,0.0428547078704229,0.209198950432929  
,0.204851447780865,0.837688189738627,0.967177857579687  
"13377","EXOSC3",110.279131930319,-0.0535334603862214,0.26846184096709  
9,-0.199408080468249,0.841943540114292,0.967177857579687  
"13378","AL161457.2",11.5436962194878,-0.111486261020985,0.54541426463  
5646,-0.204406573589455,0.838035793651345,0.967177857579687  
"13379","PTGR1",262.505124983508,-0.0643608153142869,0.313850416820563  
, -0.205068439820119,0.837518653784411,0.967177857579687  
"13380","AL359091.4",2.83503116711814,-0.185321454587567,0.92182928662  
0805,-0.201036631486193,0.8406699309664,0.967177857579687  
"13381","CCSER2",393.669713394973,0.0333276775149969,0.16386723739611,  
0.203382189414929,0.838836319683456,0.967177857579687  
"13382","GBF1",107.392292596924,0.0516715693485116,0.254952628327105,0  
.202671255784101,0.839391991455195,0.967177857579687  
"13383","FANK1",8.6129018998982,-0.110463357569538,0.552127570099967,-  
0.200068541314714,0.841426976328542,0.967177857579687  
"13384","ELP4",66.4135226084777,-0.0438118904511205,0.217131312403158,  
-0.20177601270964,0.840091834920595,0.967177857579687  
"13385","VPS37C",40.2972566536159,0.05429532610051,0.27117086590583,0.  
200225514341814,0.841304213629152,0.967177857579687  
"13386","EIF1AD",58.8251420544831,-0.0475720077933131,0.23704051798979  
6,-0.200691460669863,0.840939837269815,0.967177857579687



"13387", "PHLDB1", 352.300263847655, 0.044056967122334, 0.218993739080328, 0.201179117299667, 0.840558519650853, 0.967177857579687  
"13388", "EN02", 49.3724105898714, -0.0577655976772687, 0.287082651833698, -0.20121591224095, 0.840529749776855, 0.967177857579687  
"13389", "EPS8", 547.307360435269, -0.0347812586564023, 0.174180832362936, -0.19968476545071, 0.841727129224454, 0.967177857579687  
"13390", "AC027288.3", 20.5648222238564, 0.122898798217301, 0.615122102257003, 0.199795776751252, 0.841640304401308, 0.967177857579687  
"13391", "CHST11", 28.9402124121171, 0.0660923363767474, 0.329285906293618, 0.200714136601444, 0.84092210525203, 0.967177857579687  
"13392", "MLXIP", 202.911148563899, 0.0530594187267751, 0.2608049874252, 0.203444800847578, 0.838787385900605, 0.967177857579687  
"13393", "SGCG", 55.611569915808, 0.114468649377462, 0.570867749191414, 0.200516931530284, 0.841076317441417, 0.967177857579687  
"13394", "AL121603.2", 47.4674313522761, -0.0590550264724819, 0.29054660537096, -0.203254918077885, 0.83893579014678, 0.967177857579687  
"13395", "GPHN", 38.153731781811, 0.0548598453298414, 0.272552082732445, 0.201282062422159, 0.840478027648753, 0.967177857579687  
"13396", "AC078909.1", 5.05355978269915, -0.1454120712157, 0.712373645899221, -0.20412331653868, 0.838257133954899, 0.967177857579687  
"13397", "LINC01579", 7.42372440241962, 0.219354853446584, 1.08660590114453, 0.201871583078591, 0.840017118114495, 0.967177857579687  
"13398", "RGS11", 20.8302634775949, 0.0935112844376576, 0.459683314030677, 0.203425448745823, 0.838802510412829, 0.967177857579687  
"13399", "ZNF469", 36.1182920038187, 0.073523192539775, 0.365349413786039, 0.201240756835682, 0.840510323969869, 0.967177857579687  
"13400", "LLGL1", 36.5641132858308, 0.0891630683802509, 0.439528826533699, 0.202860570223406, 0.839244013846331, 0.967177857579687  
"13401", "GGNBP2", 430.956982461647, -0.0324099289483197, 0.161916481505666, -0.200164483855743, 0.841351942818147, 0.967177857579687  
"13402", "NARF", 143.190509782749, 0.0389128251714684, 0.194867693554993, 0.199688437121503, 0.841724257484524, 0.967177857579687  
"13403", "TGIF1", 179.549544148211, 0.047886608688896, 0.24009624660388, 0.19944755224725, 0.841912666284856, 0.967177857579687  
"13404", "AC011503.2", 2.71283480343608, -0.179098982582615, 0.873848144440456, -0.204954354737798, 0.837607787558109, 0.967177857579687  
"13405", "ZNF599", 38.7058144849526, 0.0609674745708215, 0.303908427594871, 0.200611332345462, 0.841002496284474, 0.967177857579687  
"13406", "AC074212.1", 14.212219514613, 0.102459050351221, 0.505942760982142, 0.202511149981326, 0.839517142568377, 0.967177857579687  
"13407", "NAPA", 234.699985372759, -0.0402443480892463, 0.197397017989201, -0.203875157280481, 0.838451058959632, 0.967177857579687  
"13408", "ZSCAN18", 176.154329638019, 0.0451835257820774, 0.224125726051638, 0.201599015775937, 0.840230214727423, 0.967177857579687  
"13409", "CDH22", 5.13766171356568, -0.205760254696641, 1.027943419062, -0.200166906933845, 0.841350047826996, 0.967177857579687  
"13410", "ARFRP1", 164.80508992692, -0.0526609937200152, 0.260740877755679, -0.20196677319373, 0.839942700023294, 0.967177857579687  
"13411", "TTC3", 1251.14848481498, -0.0382847723966266, 0.191981104772098, -0.199419481631146, 0.84193462238743, 0.967177857579687

"13412", "GGA1", 104.733833088224, -0.0464595867627364, 0.227599952212229, -0.204128279954183, 0.838253255374966, 0.967177857579687  
"13413", "MAGED1", 181.570580181067, 0.0664852247906356, 0.326936402897897, 0.203358280697176, 0.838855005636604, 0.967177857579687  
"13414", "AMER1", 14.035188969231, -0.0977064529770036, 0.484609093359416, -0.201619107680545, 0.84021450621876, 0.967177857579687  
"13415", "PABPC5", 59.2057938966389, -0.0507466968474957, 0.248767391379349, -0.203992559338741, 0.838359313447028, 0.967177857579687  
"13416", "CAPN6", 10.5335156204178, 0.146161107212074, 0.717465429012919, 0.203718675913293, 0.838573346969374, 0.967177857579687  
"13417", "FMR1", 162.735450803409, 0.0457606423633515, 0.228717823493025, 0.200074666960737, 0.841422185618916, 0.967177857579687  
"13418", "MTM1", 25.5488503497913, -0.0642403861953021, 0.319743834215713, -0.200912040580469, 0.840767352660782, 0.967177857579687  
"13419", "GDI1", 203.313138448406, -0.0414907897941243, 0.203126720310156, -0.20426061982772, 0.838149841993014, 0.967177857579687  
"13420", "ZAP70", 5.45248876383488, -0.162659530073865, 0.81687612401381, -0.199123863817466, 0.842165854377858, 0.967293170692008  
"13421", "ZFP3", 9.20598927650816, 0.110962745262109, 0.557267647068112, 0.199119302629365, 0.842169422241806, 0.967293170692008  
"13422", "PECR", 23.236172395778, 0.0710696086667425, 0.357070262770208, 0.199035361038954, 0.842235083820797, 0.967296514461152  
"13423", "POLR3C", 86.5391491257235, 0.041526096332716, 0.209543841330108, 0.198173785827725, 0.842909096608883, 0.967306046521953  
"13424", "ULK4", 21.6514521862058, -0.0794981628638167, 0.400814109837616, -0.198341727281069, 0.842777706476939, 0.967306046521953  
"13425", "HHIP-  
AS1", 21.1287726527232, -0.216842637734002, 1.09320915620132, -0.198354209259907, 0.842767941291052, 0.967306046521953  
"13426", "SCAMP1-  
AS1", 39.3882245443033, -0.067172084648065, 0.338266054069662, -0.198577669381604, 0.842593122972919, 0.967306046521953  
"13427", "RGMB", 43.0412596051737, -0.0561314068224946, 0.283148763209203, -0.198239985886932, 0.842857304022465, 0.967306046521953  
"13428", "TBC1D9B", 246.998091165959, -0.0359943869917195, 0.181524498280778, -0.198289417310738, 0.842818631066917, 0.967306046521953  
"13429", "MAP3K4", 141.226054000251, 0.0412883840399359, 0.208145898055473, 0.198362708204473, 0.842761292217061, 0.967306046521953  
"13430", "TRAM1", 919.739597332202, -0.0256665625189383, 0.129535935772282, -0.198142410180747, 0.842933644043425, 0.967306046521953  
"13431", "TRDMT1", 44.6782013568771, 0.0610429516674077, 0.307552690571206, 0.198479654182296, 0.842669801705841, 0.967306046521953  
"13432", "GDPD1", 9.98246703586416, 0.0972663065864797, 0.489460402413466, 0.198721502509441, 0.842480602902363, 0.967306046521953  
"13433", "TPGS2", 245.591996795807, 0.02838906777803, 0.142787229194589, 0.198820776466932, 0.842402943165206, 0.967306046521953  
"13434", "USP21", 26.2352103270705, 0.066544029805319, 0.336229423728086, 0.197912571325507, 0.843113468230603, 0.967383952193978  
"13435", "PRKAB1", 35.9893079214215, 0.0530519453067879, 0.268080985437507, 0.197895218939931, 0.843127044938443, 0.967383952193978

"13436", "PIK3CD-  
AS2", 6.14007446221381, -0.153080913126491, 0.774853862742928, -0.19756101  
1807563, 0.843388541568546, 0.967405279193412  
"13437", "EIF2AK1", 208.983400626246, -0.0339706763475009, 0.1718657493630  
67, -0.197658209814323, 0.843312488294234, 0.967405279193412  
"13438", "NAA16", 68.1734441405812, 0.0489167268865086, 0.24761614778709, 0  
.197550633606372, 0.843396662152466, 0.967405279193412  
"13439", "COL18A1", 456.934674634367, -0.0852508418307855, 0.4314089642207  
63, -0.197610269839364, 0.843349999087333, 0.967405279193412  
"13440", "AL050341.2", 37.9023324304711, 0.0578241931656288, 0.29359821747  
4174, 0.19695008254168, 0.84386660094421, 0.967584324126376  
"13441", "ZBTB47", 129.575611671498, -0.0505850126298525, 0.25653906754895  
3, -0.197182491981264, 0.84368473102055, 0.967584324126376  
"13442", "AG02", 265.472607187817, 0.0457083417204134, 0.231901198944246, 0  
.197102653753001, 0.843747206771131, 0.967584324126376  
"13443", "PARPBP", 12.9750779680452, 0.119973074623411, 0.608850459600515,  
0.197048507940898, 0.84378957801352, 0.967584324126376  
"13444", "HCFC1", 100.066697546267, 0.0421034077495039, 0.213718551355155,  
0.197003991850651, 0.843824413955806, 0.967584324126376  
"13445", "PRDX3", 472.002861690792, -0.0454946387787051, 0.231106599387463  
, -0.196855645400376, 0.843940504261797, 0.967597089862075  
"13446", "GTF3C2", 66.0402459335248, 0.0420186609292949, 0.21503814996961,  
0.195400959947028, 0.845079065166897, 0.967624698366941  
"13447", "PARTICL", 12.5008245143921, -0.0957374002461832, 0.4880720338575  
93, -0.196154242826617, 0.844489441183546, 0.967624698366941  
"13448", "REV1", 183.424176686899, -0.0385524336406788, 0.197481076118515,  
-0.195220901153801, 0.845220017094444, 0.967624698366941  
"13449", "AC024060.2", 6.14035052506814, -0.123314931757019, 0.62809490786  
9148, -0.196331685247016, 0.844350562723871, 0.967624698366941  
"13450", "TRMT10C", 154.364171691479, -0.0424799492513696, 0.2165001209874  
9, -0.196212127076937, 0.844444136516224, 0.967624698366941  
"13451", "GPR171", 2.73671502687691, -0.183718373053712, 0.936163089344247  
, -0.196246119020139, 0.844417532046276, 0.967624698366941  
"13452", "TMEM267", 54.0038868606539, -0.0533026714099529, 0.2722729113194  
14, -0.195769278521511, 0.844790756943587, 0.967624698366941  
"13453", "AL035587.2", 8.34486609894191, 0.102516337970066, 0.524434603508  
65, 0.195479736242033, 0.845017399809236, 0.967624698366941  
"13454", "C8orf58", 35.1836746561395, -0.0628171823293639, 0.3213349653823  
94, -0.195488163744056, 0.845010802894549, 0.967624698366941  
"13455", "TERF1", 282.42530657827, 0.0322246172385571, 0.164537086244842, 0  
.195850175629126, 0.844727436009084, 0.967624698366941  
"13456", "TIMM10B", 93.5053587620961, -0.0461864820911123, 0.2365661205315  
78, -0.195237094759506, 0.845207340365814, 0.967624698366941  
"13457", "SYT7", 3.43558719390258, 0.156745335755653, 0.798688719812776, 0.  
196253348604192, 0.844411873691512, 0.967624698366941  
"13458", "EHBP1L1", 92.1379295102405, 0.0477422197318966, 0.24322297797115  
7, 0.196289923469147, 0.844383247885349, 0.967624698366941  
"13459", "MBD6", 83.4894675391531, -0.0424470704377835, 0.217283942401202,  
-0.19535300201525, 0.845116606658733, 0.967624698366941  
"13460", "TMEM186", 49.4231092865813, -0.0537746458778721, 0.2741095085391

38,-0.196179425385362,0.84446973131256,0.967624698366941  
"13461","ZC3H18",128.952719327691,0.0456250009116813,0.233087820304038  
,0.195741677330752,0.844812361569599,0.967624698366941  
"13462","TMX3",228.067221721028,-0.0322774659251464,0.165102026767972,  
-0.195500119271752,0.845001444316063,0.967624698366941  
"13463","BORCS8",82.5997912451851,-0.0552614650602477,0.28188839134189  
9,-0.196040229954776,0.844578677932335,0.967624698366941  
"13464","LINC00663",6.06803015170592,-0.12185840628195,0.6232350867917  
26,-0.195525587157247,0.844981508572578,0.967624698366941  
"13465","C5AR2",19.2061073957442,0.212103079004005,1.08562878223215,0.  
195373485371217,0.845100572234892,0.967624698366941  
"13466","DNAJC9",103.185857127285,0.0490688459740083,0.251454179375685  
,0.195140307851861,0.845283107988947,0.967625063838528  
"13467","GPSM2",141.734682419939,0.052680717589887,0.270196530703902,0.  
.194971850499508,0.845414984745661,0.967675702870667  
"13468","HIST2H2AA4",17.9411120443274,0.137295003875714,0.705427273619  
18,0.194626730508058,0.845685175286971,0.967675702870667  
"13469","POLM",43.7316319090021,0.0501680671577294,0.257797393250125,0.  
.194602693709375,0.845703994101436,0.967675702870667  
"13470","COMMD4",289.407469850936,0.0554727471722934,0.284651512999673  
,0.194879509290917,0.845487275854248,0.967675702870667  
"13471","AC135050.3",5.00001677589689,0.158565171478762,0.814728420969  
183,0.194623346133103,0.84568782496579,0.967675702870667  
"13472","ZNF208",71.210205427938,0.102017493083939,0.524142305307666,0.  
.194637013747737,0.845677124392346,0.967675702870667  
"13473","USF3",107.168091016326,0.0426170702665865,0.219465858539809,0.  
.194185421596481,0.846030697484376,0.967690376324231  
"13474","ASAH2B",4.03062565405032,0.157272392118647,0.808675731438057,  
0.194481404603266,0.845798954727646,0.967690376324231  
"13475","AL158212.2",23.7094161135771,-0.100537070143002,0.51726765778  
1713,-0.194361794383496,0.845892603100601,0.967690376324231  
"13476","ABHD13",102.664097693537,0.036934687912947,0.190194820024162,  
0.194193973885592,0.846024001199963,0.967690376324231  
"13477","AC104532.2",16.5122306450296,-0.0967396730119715,0.4978879295  
60402,-0.19430009700654,0.845940909681705,0.967690376324231  
"13478","GPBAR1",2.82373293274821,-0.186207571145664,0.959890024661121  
, -0.1939884428025,0.846184931318676,0.96774350751926  
"13479","FBX045",59.3116190365812,-0.0459369812673433,0.23749426721230  
5,-0.193423537361761,0.846627283336216,0.96774350751926  
"13480","AC246817.2",3.74720787702666,-0.165527948787325,0.85501210793  
9354,-0.19359719850782,0.846491291959266,0.96774350751926  
"13481","M6PR",223.4289720739,-0.0339517611909532,0.175132754431689,-0.  
.193863000105992,0.846283155664631,0.96774350751926  
"13482","AL442125.1",7.53992759603698,0.108983244997134,0.563073306668  
903,0.193550721915535,0.846527686617147,0.96774350751926  
"13483","TOX4",303.899586919649,0.0318956166344009,0.164573769063224,0.  
.193807414243199,0.846326681361925,0.96774350751926  
"13484","TMEM121",42.4425425837666,0.0703805979249996,0.36390355283003  
,0.193404536387894,0.846642162984414,0.96774350751926  
"13485","LINC00926",10.322499875541,-0.0950333490010723,0.491239474162

604,-0.193456255043575,0.846601662272602,0.96774350751926  
"13486","DDX52",149.210663904061,0.0394440248903522,0.20371288657118,0  
.193625575457005,0.846469070840556,0.96774350751926  
"13487","ZFYVE19",82.1011853252258,-0.047806878552311,0.24730654056997  
4,-0.193310207009201,0.846716033058652,0.96775618370276  
"13488","AC017002.3",4.75946892795154,0.163717617114794,0.849163458157  
181,0.192798707412689,0.847116615832606,0.967783490184512  
"13489","RBPMS-  
AS1",15.2449316308655,0.0981232854420415,0.508196748517126,0.193081293  
275403,0.84689530279357,0.967783490184512  
"13490","SLC2A3",1336.78030761922,-0.0425506454803379,0.22069577644772  
4,-0.192802264570826,0.84711382989471,0.967783490184512  
"13491","RIOX1",17.1314048429783,-0.0728204162063192,0.377334518777887  
, -0.192986362451467,0.846969648511282,0.967783490184512  
"13492","AL118558.3",13.9510528477939,-0.0781173527689841,0.4051217461  
20893,-0.192824388019085,0.847096503029295,0.967783490184512  
"13493","AL022238.2",3.89383601373566,0.152771035545177,0.790949856468  
306,0.193148825169928,0.846842415562458,0.967783490184512  
"13494","TMC01",690.08203860532,0.033894599377217,0.176181290451738,0.  
192384783255416,0.84744081097063,0.96795106497547  
"13495","TACC1",1560.20121228468,0.0396720187894915,0.20622670151755,0  
.192370912677937,0.8474516751806,0.96795106497547  
"13496","AAAS",73.5323589276165,0.0410794454939272,0.213524990774116,0  
.192387061322412,0.847439026664262,0.96795106497547  
"13497","FBX08",135.498222745762,-0.0434839025063295,0.226231920058437  
, -0.192209403938655,0.847578179967457,0.968023830791905  
"13498","DPH7",69.185437911249,-0.05519940863279,0.28764797375488,-0.1  
91899174231028,0.84782118429061,0.968086189321464  
"13499","ANG",399.182526685808,-0.0431751318061062,0.224922023425827,-  
0.191955999454825,0.84777667175467,0.968086189321464  
"13500","PAXBP1",126.856853176741,-0.0544620951158683,0.28368303358087  
1,-0.19198220784798,0.847756142266748,0.968086189321464  
"13501","SUDS3",178.043202526205,0.0394801439356275,0.206103495672596,  
0.19155494576542,0.848090836924885,0.968274703677947  
"13502","AC139099.2",7.07124790674399,0.126839037612389,0.662247843700  
594,0.191528049232477,0.848111907172212,0.968274703677947  
"13503","MISP3",13.0618861879538,0.0922744332850924,0.48226140330197,0  
.191336965084296,0.848261602089906,0.968373887004066  
"13504","PINLYP",31.8530609099541,0.0684024931299783,0.357689119020535  
,0.191234481264864,0.848341889952591,0.968393826541705  
"13505","INCENP",13.324827568147,-0.0911085412405899,0.477184633695368  
, -0.190929327575022,0.848580962738072,0.968407400978474  
"13506","FOXN3",853.599261713897,0.0414623112416577,0.217077262908704,  
0.191002552206932,0.848523593598657,0.968407400978474  
"13507","SNRPA1",171.156566943862,-0.052851219331766,0.276910685535978  
, -0.190860165722638,0.848635149557209,0.968407400978474  
"13508","CCR10",16.7712144542631,0.0820582075802725,0.430033053363923,  
0.190818373002666,0.848667893598327,0.968407400978474  
"13509","AC006115.2",34.2091636777405,-0.0578808359077521,0.3032058860  
66563,-0.190896148681776,0.848606957595798,0.968407400978474

"13510", "SEC24D", 231.140018894699, 0.0523744089294354, 0.274818954966891, 0.190577862199298, 0.84885633569269, 0.968457029869028  
"13511", "L3MBTL3", 31.0104561436767, 0.0771983616856057, 0.405139035021215, 0.19054782435754, 0.848879871183461, 0.968457029869028  
"13512", "PPP1R3D", 36.8701419551546, -0.0578471512479027, 0.303624029261439, -0.190522309412121, 0.848899862964016, 0.968457029869028  
"13513", "SCP2", 1028.5392974577, 0.0427664484875442, 0.225431421778157, 0.189709349966439, 0.849536893653431, 0.968487954851818  
"13514", "AC107204.1", 5.79777978736841, 0.119959081023587, 0.632676358360113, 0.18960575883461, 0.849618074178472, 0.968487954851818  
"13515", "TMEM129", 113.884588838733, 0.0413668871181869, 0.217642714537083, 0.190067869747777, 0.849255947328473, 0.968487954851818  
"13516", "THEMIS", 2.58611052907698, 0.181449865152341, 0.95468649706748, 0.190062251545091, 0.849260349764762, 0.968487954851818  
"13517", "MTFR2", 2.83058398297087, -0.195736109853579, 1.03108101752708, -0.189835819422831, 0.84943778639746, 0.968487954851818  
"13518", "AGFG2", 12.7867086314308, -0.0807345736238424, 0.425309441104233, -0.189825491327516, 0.849445879876582, 0.968487954851818  
"13519", "ENTPD2", 2.93588260540564, -0.16147789565131, 0.849150317754867, -0.190164087882878, 0.849180551310714, 0.968487954851818  
"13520", "LINC00857", 6.93865107959636, -0.103731355066713, 0.545248528891421, -0.190246006307648, 0.849116361556945, 0.968487954851818  
"13521", "MSANTD4", 70.4253959635349, 0.0435404929192872, 0.229605705036541, 0.189631581290012, 0.849597837929392, 0.968487954851818  
"13522", "SBN01-AS1", 11.5406399184969, 0.105609865637468, 0.555387959285356, 0.190155122868277, 0.849187576190096, 0.968487954851818  
"13523", "PTOV1-AS1", 4.12228564021862, -0.13405421940802, 0.706395482895295, -0.189772192283242, 0.849487647239662, 0.968487954851818  
"13524", "EVC", 36.4326609940067, -0.0740471945952763, 0.390795260581759, -0.189478230838945, 0.849718015324912, 0.968530257781242  
"13525", "GOLPH3L", 103.632204162859, 0.0359429867007133, 0.189976380838812, 0.189197133570039, 0.849938314173528, 0.968709731089459  
"13526", "ACP2", 99.147541936004, 0.0546733788709553, 0.28913904896156, 0.189090263204898, 0.850022072663368, 0.96873356869036  
"13527", "RBF0X2", 541.380729521934, -0.0249255412923414, 0.132111719226356, -0.18867017580503, 0.850351328002376, 0.969037164275643  
"13528", "C12orf75", 266.817954735765, 0.0791148830372849, 0.419935551179477, 0.188397678679679, 0.850564919262321, 0.969065648959991  
"13529", "FBF1", 15.0459809671691, 0.0709173679766883, 0.37633138141334, 0.188443939249374, 0.850528658094255, 0.969065648959991  
"13530", "PPP5C", 76.8503314894646, -0.037427736977038, 0.198636467995411, -0.188423290822422, 0.850544843244552, 0.969065648959991  
"13531", "AC012063.1", 29.852634195197, -0.0677642960696521, 0.360120120109873, -0.188171369178087, 0.850742315640366, 0.969084215276663  
"13532", "C3orf35", 5.79989294615927, 0.149769270211498, 0.796342319671847, 0.188071469406792, 0.85082062610242, 0.969084215276663  
"13533", "SLC18B1", 57.0305952953195, 0.0553439590951915, 0.294294954888636, 0.188056091943996, 0.850832680477091, 0.969084215276663

"13534", "SLC24A3", 3.24319064328895, -0.168672707296509, 0.89670496830227  
1, -0.188102791061653, 0.850796073202508, 0.969084215276663  
"13535", "HYPK", 19.1443454043957, -0.0862742419025828, 0.459591423918794,  
-0.187719433854855, 0.851096595080826, 0.969241578987215  
"13536", "CERS1", 4.36718644571687, 0.132196594794725, 0.704078660410147, 0  
.187758275073579, 0.851066145636979, 0.969241578987215  
"13537", "EMC3", 367.324613632939, -0.0419456773384193, 0.225081393296338,  
-0.186357818050266, 0.852164169241585, 0.969284387996282  
"13538", "MAGI1", 21.8129251777738, 0.0691208986140839, 0.369979530654038,  
0.18682357505534, 0.851798962121695, 0.969284387996282  
"13539", "CENPC", 256.594142359921, 0.0468228370704699, 0.251246649709925,  
0.186362035571534, 0.852160862076957, 0.969284387996282  
"13540", "UBA6-  
AS1", 28.551892886774, -0.0622102853995742, 0.333872344290809, -0.18632955  
5182887, 0.852186331604787, 0.969284387996282  
"13541", "LIFR-  
AS1", 20.8611964356441, 0.0808996220622939, 0.436923511558226, 0.185157401  
518121, 0.853105579974821, 0.969284387996282  
"13542", "CLDN12", 45.8652963079249, 0.0512093303603358, 0.276013211630124  
, 0.185532170934483, 0.852811649504471, 0.969284387996282  
"13543", "PRKDC", 423.020820687636, -0.0338647690108362, 0.18299684728943,  
-0.185056570713894, 0.853184664740082, 0.969284387996282  
"13544", "TESK1", 151.384040968915, 0.0451957688918431, 0.243932955582977,  
0.185279470680086, 0.853009839274603, 0.969284387996282  
"13545", "SECISBP2", 204.189070014233, -0.0343859695530606, 0.183385443928  
15, -0.187506537141154, 0.851263498691681, 0.969284387996282  
"13546", "BX255925.3", 15.6125592236682, 0.0925869224431824, 0.49701169941  
8153, 0.186287209237877, 0.852219537449556, 0.969284387996282  
"13547", "TUBGCP2", 200.719156278723, -0.031790451541815, 0.17036837903504  
6, -0.186598309626902, 0.851975592191821, 0.969284387996282  
"13548", "AKIP1", 109.199736869123, 0.042544064102713, 0.228741632630848, 0  
.185991783014736, 0.852451205105148, 0.969284387996282  
"13549", "CSNK2A3", 2.54435754629306, -0.198760423669071, 1.06634177685835  
, -0.186394670060341, 0.852135271866607, 0.969284387996282  
"13550", "SDHAF2", 173.951663341126, -0.0502636352567081, 0.27008498116043  
3, -0.186103037054293, 0.852363960296595, 0.969284387996282  
"13551", "ATG16L2", 24.7333280445134, -0.0673735570363368, 0.3598119474274  
68, -0.187246581215645, 0.85146730412012, 0.969284387996282  
"13552", "PPME1", 78.0334769950307, -0.03744446589565251, 0.201169730204999  
, -0.186134658123604, 0.852339163556832, 0.969284387996282  
"13553", "AP001528.1", 143.990578071422, 0.0571095307292282, 0.30606530252  
7882, 0.186592633198027, 0.851980043161725, 0.969284387996282  
"13554", "CWC15", 523.826331167302, -0.0416888560718223, 0.22531437197379,  
-0.185025285811203, 0.853209202771427, 0.969284387996282  
"13555", "RHEBL1", 5.27244953505459, 0.132579300154837, 0.71643723760663, 0  
.185053614183622, 0.853186983661865, 0.969284387996282  
"13556", "CTSG", 24.5805834042555, -0.141854522662602, 0.763873828765143, -  
0.185704127201112, 0.85267679158468, 0.969284387996282  
"13557", "ATXN2L", 157.163482127881, 0.0385156993216216, 0.207569365224781  
, 0.185555798563589, 0.852793119113965, 0.969284387996282

"13558", "AC012181.1", 4.14010056416149, -0.152179519521706, 0.813575080097221, -0.187050369713291, 0.851621140495641, 0.969284387996282  
"13559", "LINC01572", 3.81643818456075, -0.190419395852885, 1.02771209242962, -0.185284767256862, 0.85300568513789, 0.969284387996282  
"13560", "RNF167", 201.865561950919, -0.0358169380022551, 0.192221783003587, -0.186331317099409, 0.852184949992307, 0.969284387996282  
"13561", "MTMR4", 45.706199804293, 0.0634366173511335, 0.341834597107877, 0.185576936588177, 0.852776541309161, 0.969284387996282  
"13562", "ANKRD12", 1160.3235570094, -0.0384934754768067, 0.207876730871187, -0.18517452778618, 0.853092147451782, 0.969284387996282  
"13563", "AC005523.2", 17.3832128394092, -0.0785583951928178, 0.4228292710896, -0.185792234748504, 0.852607694285011, 0.969284387996282  
"13564", "BISPR", 8.28499671862894, 0.112475199543458, 0.607181361109833, 0.18524152213413, 0.853039602664458, 0.969284387996282  
"13565", "ZNF585B", 27.8003795019058, -0.0539510701144134, 0.288310271402956, -0.187128505175623, 0.851559879004931, 0.969284387996282  
"13566", "ZNF132", 4.9394229539312, -0.12690154461541, 0.684616286427326, -0.185361562573462, 0.852945454571794, 0.969284387996282  
"13567", "CEBPB-AS1", 8.98876253515071, 0.0961504338290098, 0.513109155516862, 0.187387874091149, 0.85135652928352, 0.969284387996282  
"13568", "NAP1L3", 29.431355952893, 0.0609120958267559, 0.328694706176865, 0.185315110593781, 0.852981886756593, 0.969284387996282  
"13569", "AC234775.3", 4.08287483899941, 0.143750512948366, 0.771260991571756, 0.186383746253543, 0.852143837710854, 0.969284387996282  
"13570", "MZF1-AS1", 11.6509501259021, -0.0864408602065477, 0.467398609825112, -0.184940345113332, 0.853275825958218, 0.969288640909796  
"13571", "GPLD1", 4.85708691409944, 0.127815914250317, 0.6915896791401, 0.184814664107248, 0.853374405701775, 0.969329191945535  
"13572", "MFAP2", 517.104673033668, 0.0554230853288454, 0.300759171243693, 0.184277291028769, 0.853795927977976, 0.969393877318812  
"13573", "ELP6", 128.315724949658, 0.0431009534097346, 0.23401426507212, 0.184180880582008, 0.853871557978257, 0.969393877318812  
"13574", "CYBR4", 60.9083677708881, 0.0457323071227762, 0.247674468402379, 0.184646836703726, 0.853506047161459, 0.969393877318812  
"13575", "PRTFDC1", 130.640420298322, -0.0450004941398956, 0.244232731855626, -0.184252511110988, 0.85381536666834, 0.969393877318812  
"13576", "PHYHIPL", 4.2786182759471, 0.172850572973109, 0.938351653863265, 0.18420660552908, 0.853851377673225, 0.969393877318812  
"13577", "UCKL1", 110.210078951394, -0.0363401500793945, 0.197049505075083, -0.184421422756417, 0.853682865116466, 0.969393877318812  
"13578", "PDK3", 38.0619125243387, 0.0639531495728959, 0.346709158899687, 0.184457629489388, 0.853654463536588, 0.969393877318812  
"13579", "EAF1-AS1", 4.9302392157103, -0.135595459255002, 0.738119250582276, -0.183704000604287, 0.854245670296194, 0.969463346884861  
"13580", "AC009275.1", 9.58838982638913, 0.100860507795322, 0.54840819612576, 0.183915026266663, 0.854080116627289, 0.969463346884861  
"13581", "AC009318.1", 11.7952283452134, 0.115076349953705, 0.625659978135



259,0.183927938457375,0.8540699869752,0.969463346884861  
"13582","AC026124.1",11.7955752375651,0.106483350771653,0.579652501683  
077,0.183702046419999,0.854247203421153,0.969463346884861  
"13583","SNAP23",205.914805216391,-0.0319911513346499,0.17409626569925  
5,-0.183755528621811,0.854205244988239,0.969463346884861  
"13584","ATXN7L2",5.87871744953408,-0.106836746412728,0.58300070018157  
3,-0.183253204291957,0.854599350116783,0.969472367455568  
"13585","ETV7",14.9400732732926,-0.0852497584041059,0.465620677493517,  
-0.183088429111469,0.854728634548544,0.969472367455568  
"13586","PGM3",204.844044968798,-0.0347186269853854,0.189360203405027,  
-0.183347009356158,0.854525751367929,0.969472367455568  
"13587","AC021054.1",20.6033516622917,0.0780827639982463,0.42566763312  
0089,0.18343599071865,0.854455938429039,0.969472367455568  
"13588","B3GLCT",39.7401282554409,0.0495765463351238,0.270767194884174  
,0.183096576216817,0.854722242147761,0.969472367455568  
"13589","AL136418.1",2.73927174665124,0.191449665985517,1.045883612830  
27,0.183050641234768,0.854758283885088,0.969472367455568  
"13590","FAM219B",114.574716797399,-0.0345949112390608,0.1886023976735  
05,-0.18342773827801,0.85446241307556,0.969472367455568  
"13591","CFDP1",685.451748188508,-0.0324972720333001,0.177443773695821  
, -0.183141235989536,0.854687201262233,0.969472367455568  
"13592","GTPBP1",67.4725097792013,0.0403872889986425,0.220906704253497  
,0.182825094127958,0.854935258189654,0.969601751397405  
"13593","ANKRD39",86.1169967349763,-0.0504643353327946,0.2773449721057  
46,-0.181955111533637,0.855617953562711,0.969972767123997  
"13594","AC079305.3",6.60633504538685,-0.11686499402741,0.642971204121  
297,-0.181757741681637,0.855772849288819,0.969972767123997  
"13595","ABHD14B",287.922222435507,0.0427060656198399,0.23501538382179  
3,0.181716043117513,0.855805575004889,0.969972767123997  
"13596","PLK4",2.63327472663231,0.167081371536419,0.917768393481219,0.  
18205178204346,0.855542088641232,0.969972767123997  
"13597","AC013643.2",4.43835573111245,-0.139177824013153,0.76519662787  
2536,-0.181885046200618,0.855672940152046,0.969972767123997  
"13598","DEPDC7",5.31835920678516,0.117781425652248,0.648267128593641,  
0.181686561692191,0.855828712659973,0.969972767123997  
"13599","FAM174B",19.3470340899549,0.0716502228339136,0.39366295884830  
8,0.182009054251718,0.855575620321771,0.969972767123997  
"13600","AC135178.6",3.43986850982052,-0.136290573997873,0.74923728870  
6106,-0.181905754094594,0.855656688726056,0.969972767123997  
"13601","ZNF236-  
DT",7.09847118343698,0.111971334321277,0.615635693286614,0.18187921126  
4555,0.855677519384516,0.969972767123997  
"13602","TRIM62",9.21133674311259,0.0866285075179193,0.481562102036541  
,0.179890625012983,0.857238435295019,0.970293283809472  
"13603","IRF2BP2",1093.36012200681,0.0381546108325741,0.21165528016616  
5,0.180267701342579,0.856942410854024,0.970293283809472  
"13604","GCFC2",81.7585733997951,-0.0358409373970327,0.198451574176715  
, -0.180602938251916,0.856679249419213,0.970293283809472  
"13605","MRPL35",112.566656525018,-0.0436631101885277,0.24299542594988  
5,-0.17968696331565,0.857398328625961,0.970293283809472

"13606", "GORASP1", 45.964735160988, -0.0550681302130705, 0.306409473753786, -0.179720716655518, 0.857371828717366, 0.970293283809472  
"13607", "PROS1", 556.388624771371, 0.0360343038313607, 0.19958790423916, 0.180543525263846, 0.856725887535741, 0.970293283809472  
"13608", "DUBR", 49.97078277218, -0.0556267425188528, 0.308437139541609, -0.180350338488821, 0.856877539102489, 0.970293283809472  
"13609", "AC112236.2", 3.09078888653589, -0.162629923219324, 0.904613737876022, -0.179778303611848, 0.857326617293582, 0.970293283809472  
"13610", "THBS4", 82.5320382876773, -0.273717810228608, 1.51908960788547, -0.180185427382138, 0.857006998457738, 0.970293283809472  
"13611", "SPDL1", 37.0625500294606, 0.0576626196879812, 0.318393753291655, 0.181104745592044, 0.856285359750057, 0.970293283809472  
"13612", "TRIM26", 72.7114856893765, -0.0426794567884462, 0.237765308669884, -0.179502455708132, 0.857543189271047, 0.970293283809472  
"13613", "AL662797.1", 3.70090016753615, -0.140448251234361, 0.781091210531263, -0.179810308118606, 0.857301490810817, 0.970293283809472  
"13614", "AL355312.3", 8.08861480105443, 0.11747511457163, 0.653622771283888, 0.179729225683001, 0.857365148264554, 0.970293283809472  
"13615", "UBE2W", 117.086325141197, -0.0404401544344873, 0.224304967985923, -0.180290944055351, 0.856924164779105, 0.970293283809472  
"13616", "FBX032", 68.2913296637626, 0.064768423226885, 0.357352375940644, 0.181245257027878, 0.856175072829863, 0.970293283809472  
"13617", "CSTF3", 78.5889409243381, 0.0507179519866817, 0.280202832840101, 0.181004422662722, 0.856364104573538, 0.970293283809472  
"13618", "AP5B1", 51.1437229358622, 0.0492394080882455, 0.272514085860104, 0.18068573568532, 0.856614255772501, 0.970293283809472  
"13619", "ORMDL2", 94.4157281007642, -0.0532829298299569, 0.296528729316002, -0.179688929139729, 0.857396785243664, 0.970293283809472  
"13620", "PEBP1", 2434.70356826805, -0.0391874500757801, 0.218180453152787, -0.179610269891309, 0.857458541597724, 0.970293283809472  
"13621", "DTD2", 44.4529769737771, -0.0471599138877938, 0.262859650190364, -0.179411004517583, 0.857614991224414, 0.970293283809472  
"13622", "MAP1LC3B", 857.185187034032, 0.0375924687075833, 0.209543382750004, 0.179401841347732, 0.857622185657091, 0.970293283809472  
"13623", "B9D1", 41.3696347874078, 0.049446811055342, 0.27504531626629, 0.179776960853495, 0.857327671485606, 0.970293283809472  
"13624", "DCAF15", 48.5042794815112, -0.0478160139672493, 0.264427700158185, -0.180828309358834, 0.856502341744527, 0.970293283809472  
"13625", "AC007773.1", 3.16811965209519, -0.164007595609576, 0.913775943619394, -0.179483380750816, 0.857558165678598, 0.970293283809472  
"13626", "SELENON", 253.0174654496, -0.0379014833832764, 0.211811013698775, -0.178940097218823, 0.857984737842893, 0.970385853555271  
"13627", "MUC1", 11.8533776001855, 0.0997379046743667, 0.557913720912679, 0.178769406336176, 0.858118768472352, 0.970385853555271  
"13628", "ORMDL1", 331.736438444102, 0.031256745893481, 0.174996936581092, 0.178613103201363, 0.858241505079958, 0.970385853555271  
"13629", "TMF1", 417.602220466635, -0.0291231530118745, 0.163047026880247, -0.17861811754019, 0.858237567530941, 0.970385853555271  
"13630", "AL353135.2", 7.3254157148768, -0.107947537511232, 0.604758490118879, -0.17849693600831, 0.858332727269341, 0.970385853555271

"13631", "FAM229B", 220.078307495105, 0.0582264400225464, 0.32596847466363  
9, 0.178625985481048, 0.858231389175585, 0.970385853555271  
"13632", "NOL6", 33.2610037489961, -0.0570725000117165, 0.319746273196201,  
-0.178493089039684, 0.858335748196773, 0.970385853555271  
"13633", "NUDT13", 6.6531536366492, 0.115560128962368, 0.647181058644276, 0  
.178559195172437, 0.858283837006561, 0.970385853555271  
"13634", "TRIM6", 13.3981269557025, -0.0801258834065153, 0.449096416134057  
, -0.178415771152797, 0.858396464422943, 0.970385853555271  
"13635", "CACNA1C", 34.4895034591196, 0.0888058198070661, 0.49576015788589  
9, 0.179130610627861, 0.857835146918533, 0.970385853555271  
"13636", "TRPV4", 5.3560885920884, -0.120316872118783, 0.672534683325752, -  
0.178900620446523, 0.858015735600165, 0.970385853555271  
"13637", "VRK2", 64.8637204730225, -0.040557652879539, 0.227676536033359, -  
0.178137165937892, 0.858615254599805, 0.970387685468351  
"13638", "ASNS", 6.20739365173439, 0.104291449479858, 0.585592024479752, 0.  
178095747756319, 0.858647781448567, 0.970387685468351  
"13639", "ANAPC2", 41.3634653663769, -0.051992036461783, 0.2915505872713, -  
0.178329383412979, 0.858464304018136, 0.970387685468351  
"13640", "LYRM1", 211.963714088273, 0.0428697872205446, 0.240715646357457,  
0.178093064864109, 0.858649888406637, 0.970387685468351  
"13641", "INVS", 42.4809971342658, 0.0485556837234159, 0.27279157572698, 0.  
177995539613042, 0.858726478680067, 0.970403098662358  
"13642", "UGDH-  
AS1", 6.57371298423482, -0.113453452582808, 0.637872508854436, -0.17786227  
0293732, 0.858831142273742, 0.970450231501959  
"13643", "DMAP1", 143.866472413089, 0.0480570432962945, 0.270371268159736,  
0.177744638412919, 0.858923527003874, 0.970483483747322  
"13644", "GNL3L", 119.891879719635, -0.052291436790223, 0.294441131624511,  
-0.177595557053177, 0.859040614034536, 0.97054463979349  
"13645", "MORN1", 14.947905235967, 0.0858223994987352, 0.485915933261758, 0  
.176619850521558, 0.859807000752393, 0.970569785189001  
"13646", "SYTL1", 7.25923902501122, -0.115456487452247, 0.657974630506662,  
-0.17547255182672, 0.860708336618884, 0.970569785189001  
"13647", "TMEM59", 2707.16848660421, -0.0416677299067799, 0.23809792490748  
5, -0.175002490773366, 0.861077676434952, 0.970569785189001  
"13648", "MCOLN2", 2.79517431238581, 0.157030116810393, 0.890841677747186,  
0.176271632471776, 0.860080547069202, 0.970569785189001  
"13649", "RSBN1", 184.555794402704, 0.0326948439670566, 0.185229726720317,  
0.176509702551272, 0.859893526820417, 0.970569785189001  
"13650", "PSMB4", 596.441196287929, -0.0375346544298303, 0.213755025910688  
, -0.175596593670332, 0.860610878629134, 0.970569785189001  
"13651", "CGREF1", 68.0647876778951, 0.0768875568647491, 0.433920212043453  
, 0.177192844976416, 0.859356915621134, 0.970569785189001  
"13652", "UMPS", 82.0641226459421, -0.0463007928416297, 0.262873716319778,  
-0.176133215179665, 0.860189286880665, 0.970569785189001  
"13653", "H1FX-  
AS1", 23.3456555565699, -0.0615584691375172, 0.351081255027311, -0.1753396  
63556599, 0.860812747479217, 0.970569785189001  
"13654", "FOXO1", 11.5658269722933, -0.122267186464484, 0.698113512626184,  
-0.175139406777181, 0.860970094649308, 0.970569785189001

"13655", "CKMT2-  
AS1", 32.9530580882822, 0.0569882114042965, 0.323400270952888, 0.176215719  
41292, 0.860124471720457, 0.970569785189001  
"13656", "FYN", 1305.61268478058, -0.0305135704839992, 0.174037198900185, -  
0.175327864829056, 0.860822017905588, 0.970569785189001  
"13657", "HSF2", 65.5941224287969, -0.0394937346257785, 0.22310701332965, -  
0.177017002004436, 0.859495034804675, 0.970569785189001  
"13658", "INHBA", 14.4325521239792, -0.137521581953156, 0.776415577639724, -  
0.177123676950451, 0.859411244440296, 0.970569785189001  
"13659", "TP53I11", 186.430417727201, 0.045831101716087, 0.26165974404217, 0.  
175155341085638, 0.860957574429835, 0.970569785189001  
"13660", "INTS5", 48.4048908009501, -0.0444489793659588, 0.251782119730829  
, -0.176537473802658, 0.859871711124181, 0.970569785189001  
"13661", "SPINDOC", 23.2189131596187, -0.0569356068910951, 0.3250124924837  
66, -0.175179749110533, 0.860938396142325, 0.970569785189001  
"13662", "DPP3", 31.8132063176031, -0.0626226434385081, 0.356510333833103,  
-0.175654497206873, 0.86056538533452, 0.970569785189001  
"13663", "CCS", 314.879619656333, 0.0337248770556664, 0.190978872972826, 0.  
176589569991153, 0.85983078727113, 0.970569785189001  
"13664", "BORCS5", 76.2306229512593, 0.0420309609630204, 0.239732128263083  
, 0.175324689550561, 0.860824512769888, 0.970569785189001  
"13665", "PPP1R12A-  
AS1", 3.25478712304111, -0.145218597089365, 0.8250853465104, -0.1760043342  
22575, 0.860290537386819, 0.970569785189001  
"13666", "PARN", 87.8053252923394, 0.0422893834840138, 0.241634162691001, 0.  
.175014091604642, 0.861068560978776, 0.970569785189001  
"13667", "NOM02", 3.25243716509333, 0.151885569235866, 0.867037642570089, 0.  
.175177595272154, 0.860940088489467, 0.970569785189001  
"13668", "ZFP1", 144.034739404877, -0.0544553537321755, 0.307910166390705  
, -0.176854679306293, 0.859622538050049, 0.970569785189001  
"13669", "LINC02693", 40.2924337761356, 0.0460086686515982, 0.260056010731  
014, 0.17691830510769, 0.859572560030385, 0.970569785189001  
"13670", "SPOP", 590.069551880429, 0.0345711620781944, 0.197490249620244, 0.  
.17505250079268, 0.861038380750332, 0.970569785189001  
"13671", "C18orf32", 630.4426681155, -0.0459852197669553, 0.26222509146109  
3, -0.175365444667137, 0.860792490964377, 0.970569785189001  
"13672", "RAC2", 16.1800745786018, 0.0882888363771878, 0.504334177665272, 0.  
.175060188833336, 0.861032339854936, 0.970569785189001  
"13673", "CHKB", 160.31162817641, -0.0340985289013818, 0.194675511990831, -  
0.175155717083655, 0.860957278993671, 0.970569785189001  
"13674", "KRB0X4", 77.5941960082053, 0.036351190464327, 0.207443423068329,  
0.175234239421288, 0.860895581386589, 0.970569785189001  
"13675", "USP27X", 18.6479803057969, 0.0705914690323689, 0.403247767940167  
, 0.175057308792948, 0.861034602852256, 0.970569785189001  
"13676", "MID2", 4.5156071180246, -0.134661621216695, 0.768714134183787, -0.  
.175177761444022, 0.860939957922319, 0.970569785189001  
"13677", "SLC41A1", 62.7379965876704, -0.0624102155764304, 0.3569447578568  
84, -0.174845586614424, 0.861200967088289, 0.970592944825296  
"13678", "BCL2L11", 81.2869406543108, -0.0600813494144014, 0.3438407973815  
45, -0.174735953010636, 0.861287115943252, 0.970592944825296

"13679", "SLC16A12", 10.9460074900584, 0.120966702323076, 0.692036638554286, 0.174798118457693, 0.861238266830255, 0.970592944825296  
"13680", "MTPN", 744.309708584548, -0.0234095418466696, 0.13406761234123, -0.174609970580273, 0.861386113560396, 0.970633548284612  
"13681", "PIDD1", 24.3002700461797, -0.0644055491855498, 0.369384258995992, -0.174359214333085, 0.861583165539815, 0.970784628082469  
"13682", "TFDP1", 133.16431527817, -0.0321968692643945, 0.18489306824976, -0.174137784445774, 0.861757179126252, 0.970909729296242  
"13683", "AC099778.1", 14.4929840778091, -0.076249998295156, 0.438434953322672, -0.173914049774765, 0.861933010772312, 0.971036860414762  
"13684", "CYP39A1", 8.58342075752352, -0.107472313211409, 0.618576647165547, -0.173741303852758, 0.862068775367955, 0.971047875213521  
"13685", "PCCA-DT", 30.1354130865197, -0.0517651888147508, 0.297931214113309, -0.173748792884332, 0.862062889498506, 0.971047875213521  
"13686", "HCP5", 4.80293230764593, 0.130691837186162, 0.752691033717216, 0.173632780691875, 0.862154068050605, 0.971072991304989  
"13687", "SLC22A15", 11.9934356854549, -0.0873017916054867, 0.503470547064699, -0.173399997506245, 0.862337027065072, 0.971203840971874  
"13688", "ADAMTS10", 55.6316483914296, -0.0564529135817858, 0.325856902348136, -0.173244492214172, 0.862459252615244, 0.971203840971874  
"13689", "ZNF677", 146.515028709385, 0.0325333925063468, 0.18774426204007, 0.173285682091329, 0.862426877477386, 0.971203840971874  
"13690", "FYTTD1", 214.491368670543, 0.0259307450758226, 0.149884296927074, 0.173005081969588, 0.86264743302594, 0.971273842677296  
"13691", "RPL13A", 18558.8848833653, 0.0324743504500299, 0.18767458721184, 0.173035416954849, 0.862623588794507, 0.971273842677296  
"13692", "AC156455.1", 5.55019265533554, 0.105266264157483, 0.609024783936548, 0.172843974389802, 0.862774070635478, 0.9713454790276  
"13693", "TSTD1", 5.33055920425428, 0.115966415419911, 0.67140437829408, 0.17272216144101, 0.862869823286446, 0.971382335935191  
"13694", "UBE4B", 106.059302167688, 0.0384155707931388, 0.230937317966719, 0.166346310467999, 0.867884423207373, 0.971575092178001  
"13695", "AL031293.1", 5.60846851743469, 0.105811327515655, 0.63387013060946, 0.166929032314425, 0.867425889162343, 0.971575092178001  
"13696", "SAMD13", 8.10977093891368, -0.100027032661693, 0.597367574292331, -0.167446371323702, 0.867018841145391, 0.971575092178001  
"13697", "PSRC1", 7.19904744403609, -0.0957299420643879, 0.590125124509914, -0.16221973627015, 0.871132818348995, 0.971575092178001  
"13698", "S100A9", 45.8180861988033, -0.0621477724204444, 0.364951301898124, -0.170290589723099, 0.864781611488628, 0.971575092178001  
"13699", "MEF2D", 164.073667379664, -0.0316353849453266, 0.191262589603792, -0.165402889351549, 0.868626879626213, 0.971575092178001  
"13700", "SH2D2A", 8.60814254289424, 0.0836171074834027, 0.503998104121508, 0.165907583380996, 0.868229679531058, 0.971575092178001  
"13701", "KLHL12", 46.7046410234202, -0.0455201182728396, 0.271038701589859, -0.167946931585149, 0.866625028393331, 0.971575092178001  
"13702", "AKT3", 242.824376781083, 0.045225323374242, 0.272668595858058, 0.165861870641623, 0.868265654622547, 0.971575092178001  
"13703", "SILC1", 2.58273592953666, -0.199503529770382, 1.19852835056752, -

0.166457080198324,0.86779725693863,0.971575092178001  
"13704","CYS1",205.636613728054,-0.0615022357197307,0.367631054413922,  
-0.167293363771398,0.867139225501498,0.971575092178001  
"13705","DDX1",403.977250132432,0.0357140705714059,0.218234961372911,0  
.16364962949442,0.870006972654012,0.971575092178001  
"13706","THUMPD2",67.5083407851184,-0.0377284474053597,0.2215866339165  
6,-0.170264996306441,0.864801738173509,0.971575092178001  
"13707","SRBD1",87.1819305831867,0.0363663217305547,0.221899801431946,  
0.163886229261489,0.869820707979256,0.971575092178001  
"13708","UGP2",1053.79887355559,0.0337816007729893,0.201879586360159,0  
.16733539721407,0.867106153827291,0.971575092178001  
"13709","AC073263.2",7.0308544261212,0.123327380185789,0.7549367874820  
27,0.163361200872365,0.870234049679298,0.971575092178001  
"13710","AC233263.6",6.36523883986356,0.112665746366195,0.670496016745  
584,0.168033431299183,0.866556978619571,0.971575092178001  
"13711","IL1R1",695.477307002683,0.0364171440789461,0.220612865841093,  
0.165072621399956,0.868886822316448,0.971575092178001  
"13712","POLR2D",68.2666192659993,0.0425663047721494,0.25693741472947,  
0.16566798890293,0.868418239042855,0.971575092178001  
"13713","AC012306.2",37.6873170564172,-0.0539116831776444,0.3226979555  
64883,-0.167065462448536,0.867318541016526,0.971575092178001  
"13714","MGAT5",29.5628825183974,-0.0516968484331778,0.316856118156014  
, -0.163155594829712,0.870395927833372,0.971575092178001  
"13715","UBXN4",982.036226231094,-0.0210579799068259,0.124149430951644  
, -0.169618013916052,0.865310554779798,0.971575092178001  
"13716","SP3",340.58833267628,0.0308412172288288,0.189479883321966,0.1  
62767765570254,0.870701289106127,0.971575092178001  
"13717","NFE2L2",910.595509375106,0.0267906089911624,0.163234023045994  
, 0.164123927666805,0.869633585667291,0.971575092178001  
"13718","AC010136.1",2.66081222683753,-0.169614053670384,1.01537631618  
107,-0.167045509105745,0.867334240872951,0.971575092178001  
"13719","BRPF1",34.7716105217756,0.0452672603369104,0.277041310991204,  
0.163395344091292,0.870207168499221,0.971575092178001  
"13720","SEMA3B-  
AS1",2.83406345947562,-0.151296289215242,0.91391433660291,-0.165547560  
811467,0.868513018103225,0.971575092178001  
"13721","C3orf38",114.8237649656006,0.0431613378969192,0.25236465730086  
6,0.171027664327271,0.864202013076727,0.971575092178001  
"13722","LINC02066",2.74989346153812,-0.148824009512965,0.873605714231  
459,-0.17035603944497,0.864730142170055,0.971575092178001  
"13723","LINC00884",10.376156309631,-0.0981717189197241,0.604875598184  
785,-0.162300676724825,0.871069081796747,0.971575092178001  
"13724","PIGZ",41.3282919381068,0.0482068453729221,0.296398762643697,0  
.162641857688427,0.870800428091852,0.971575092178001  
"13725","NOP14-  
AS1",36.1464368028038,-0.051122842045062,0.313464537985677,-0.16308971  
4624746,0.870447797915071,0.971575092178001  
"13726","AC110792.4",4.37356174475266,0.150128840999839,0.911768953662  
01,0.164656671404378,0.869214222594636,0.971575092178001  
"13727","CEP135",45.8083386622741,0.0492890475475238,0.287763579486898

,0.171283133311761,0.864001142145161,0.971575092178001  
"13728","METAP1",70.1361062234283,-0.0347770301018219,0.21193554145300  
9,-0.164092487099587,0.869658336073569,0.971575092178001  
"13729","NUDT6",33.9675517672623,0.048657680633409,0.284504524082906,0  
.171026034788923,0.864203294383288,0.971575092178001  
"13730","TMA16",187.102175389538,-0.0379726627324648,0.22753137108411,  
-0.166889789972864,0.867456766903618,0.971575092178001  
"13731","NREP",108.474921439938,-0.0438698860773854,0.268894955905337,  
-0.163148787710356,0.870401287320884,0.971575092178001  
"13732","APBB3",26.8560116515784,0.0604341008740994,0.354208532509104,  
0.17061729271738,0.864524699683885,0.971575092178001  
"13733","PCDHB14",56.0098556341657,0.0496325379571057,0.29636886939074  
,0.167468796770517,0.867001197354005,0.971575092178001  
"13734","AFAP1L1",37.936035399329,-0.0813620550925712,0.49425031662223  
4,-0.164617102622431,0.869245368926082,0.971575092178001  
"13735","SIMC1",26.9718287713071,-0.0535327898113594,0.3167448591346,-  
0.169009182840788,0.865789418445319,0.971575092178001  
"13736","AL391422.4",53.6576897065613,0.0470262263537628,0.28866551722  
9516,0.162909054067489,0.870590041950605,0.971575092178001  
"13737","HLA-  
E",5205.3464245998,-0.0318774710173066,0.193231678478136,-0.1649702122  
7766,0.868967427939056,0.971575092178001  
"13738","AL512274.1",7.99742115841468,0.139116376451779,0.844494465719  
089,0.164733319280335,0.869153890252102,0.971575092178001  
"13739","HECA",140.351671513649,-0.0445351177635812,0.270330594863855,  
-0.16474316488672,0.869146140470934,0.971575092178001  
"13740","AHR",489.375114018672,0.0470451568586058,0.278698122865742,0.  
168803278525378,0.865951379444563,0.971575092178001  
"13741","AC003986.2",2.43144684542489,-0.156398984547557,0.93606635524  
5541,-0.167081087436939,0.867306246868718,0.971575092178001  
"13742","TRGC2",2.44184711851787,0.176215649859665,1.03838681593419,0.  
169701355174788,0.865245008256341,0.971575092178001  
"13743","VKORC1L1",189.560102551188,0.0292326729935509,0.1712955360915  
9,0.1706563618676,0.864493977550791,0.971575092178001  
"13744","ADAM22",37.2784786986788,-0.0677702734082627,0.41361284988674  
8,-0.163849535687344,0.869849594756459,0.971575092178001  
"13745","MEPCE",114.160451905611,0.0361824021680105,0.21269219206522,0  
.1701162690397,0.864918699159351,0.971575092178001  
"13746","EPHB4",39.1192726029165,-0.0469906532594802,0.28330192848109,  
-0.1658677493352,0.868261028182721,0.971575092178001  
"13747","ZNF783",45.9486732500031,0.0500833266746109,0.293274855470445  
,0.170772658277409,0.864402528763505,0.971575092178001  
"13748","LINC01003",154.461519935994,-0.0483183734107632,0.28866464210  
0082,-0.16738583935753,0.867066466542089,0.971575092178001  
"13749","NOM1",75.5708964928495,0.0512497377192642,0.302449469534438,0  
.169448925792971,0.865443542642327,0.971575092178001  
"13750","INTS9",33.9357878449434,0.0467202225497128,0.27931818898555,0  
.167265235104792,0.867161357106678,0.971575092178001  
"13751","AC016405.1",2.72518282635967,0.176773262611272,1.065655486926  
07,0.165882186860579,0.868249666095382,0.971575092178001

"13752", "OPLAH", 16.2656255391669, -0.0666141710528129, 0.39084119369698, -0.170437948013379, 0.86466573050925, 0.971575092178001  
"13753", "TDRD7", 29.0624740684316, -0.050258001483699, 0.307150084254103, -0.163626852344019, 0.870024904491587, 0.971575092178001  
"13754", "TRM0", 38.3972133274249, 0.048801534133087, 0.296582256304038, 0.164546371523516, 0.869301044995475, 0.971575092178001  
"13755", "UGCG", 282.521954793533, -0.0624147624719591, 0.36689717878766, -0.170115133286651, 0.864919592341166, 0.971575092178001  
"13756", "TTLL11", 18.4383448204765, -0.0583774542009338, 0.359629636885217, -0.162326594400133, 0.871048673103096, 0.971575092178001  
"13757", "WDR5", 53.2968896183454, -0.0447914849005583, 0.262219032655106, -0.170817062541269, 0.86436761229123, 0.971575092178001  
"13758", "SFTA1P", 7.50155101765231, -0.0989865459896411, 0.609870750724397, -0.162307416566651, 0.87106377454679, 0.971575092178001  
"13759", "ARL5B", 180.254650451961, 0.045631968815696, 0.278641674508604, 0.163765771563675, 0.869915538167823, 0.971575092178001  
"13760", "AL442003.1", 4.46782441874944, -0.126102663467337, 0.746753959788157, -0.168867753313435, 0.865900664014945, 0.971575092178001  
"13761", "SAR1A", 551.255708023239, -0.0341754191706358, 0.200013961280063, -0.170865168370836, 0.864329785460047, 0.971575092178001  
"13762", "FRA10AC1", 241.10761001632, -0.0340784285166832, 0.20442365716274, -0.166704915613331, 0.867602237564698, 0.971575092178001  
"13763", "TRIM8", 421.905944512077, -0.0271330403558689, 0.163941946550506, -0.165503953849358, 0.868547338027841, 0.971575092178001  
"13764", "DHX32", 72.6606161489847, 0.0403891425955896, 0.240628929778718, 0.167848240993846, 0.866702670000853, 0.971575092178001  
"13765", "MOB2", 168.027759986449, -0.0419323545893065, 0.245001725926656, -0.171151262019515, 0.864104829209931, 0.971575092178001  
"13766", "TRIM3", 49.3253907262342, 0.0479851693895668, 0.291071113317989, 0.164857202223101, 0.869056379074106, 0.971575092178001  
"13767", "LINC02709", 14.6437141681819, 0.102024469227155, 0.608981556417399, 0.167532937823863, 0.866950733112641, 0.971575092178001  
"13768", "COMMD9", 178.558830966534, -0.0418481655993536, 0.248659740249645, -0.168294897908843, 0.866351287496891, 0.971575092178001  
"13769", "YPEL4", 52.0115442645306, 0.0539810140800841, 0.329383990152078, 0.163884753643189, 0.869821869646797, 0.971575092178001  
"13770", "CLP1", 30.3011618492485, 0.0493338264291766, 0.291053300715443, 0.169501003108051, 0.86540258341124, 0.971575092178001  
"13771", "H2AFX", 170.665728846493, 0.0557807948454398, 0.333512592628593, 0.167252439872813, 0.867171424416143, 0.971575092178001  
"13772", "SC5D", 86.7340726619497, -0.0407889263095445, 0.239981454230672, -0.169966993659176, 0.865036094164374, 0.971575092178001  
"13773", "TMEM117", 18.6138695211954, 0.0614581729315849, 0.376930690626166, 0.163049002004823, 0.870479852843853, 0.971575092178001  
"13774", "ARHGAP9", 6.28907090900325, 0.131181042625952, 0.783294622824649, 0.167473436946239, 0.866997546585858, 0.971575092178001  
"13775", "TBK1", 121.477764950147, 0.0298135453382468, 0.178357203601402, 0.167156384694588, 0.867247001475447, 0.971575092178001  
"13776", "ANKRD13A", 89.1626663424878, 0.0359348797459239, 0.210037397450444, 0.171088007098366, 0.864154565786617, 0.971575092178001



"13777", "WSB2", 132.702865180311, 0.0359563957683824, 0.215652958194374, 0.16673268045771, 0.867580390169572, 0.971575092178001  
"13778", "LINC00545", 11.3339162778039, 0.110559558970681, 0.680247737196501, 0.16252837448064, 0.870889785715717, 0.971575092178001  
"13779", "RFC3", 31.3848584704146, -0.0560425492818722, 0.333165069857891, -0.16821255993546, 0.866416060337668, 0.971575092178001  
"13780", "TPT1", 35786.5403396089, -0.0415792117877846, 0.253333461573697, -0.164128384499608, 0.869630077203309, 0.971575092178001  
"13781", "ALG11", 33.6218048111354, -0.0548333167509662, 0.326433628025856, -0.167976924076655, 0.866601433032685, 0.971575092178001  
"13782", "TDRD3", 130.322828481095, -0.033000630273505, 0.20318930155598, -0.162413227570513, 0.870980455037237, 0.971575092178001  
"13783", "PCCA", 79.6512367806085, 0.036174965165491, 0.21017631754344, 0.172117227993655, 0.86334536889984, 0.971575092178001  
"13784", "FGF14-AS2", 46.2264350219096, -0.0514321343795489, 0.303036280381842, -0.169722695628199, 0.865228224491273, 0.971575092178001  
"13785", "AL355075.4", 43.5692404704424, -0.101823167624867, 0.598513203374294, -0.170126852759152, 0.864910375891949, 0.971575092178001  
"13786", "CLEC14A", 66.1624825344443, 0.0740800432182389, 0.453511051712737, 0.163347823473027, 0.870244581834371, 0.971575092178001  
"13787", "FBX033", 101.733689731248, -0.0418535188624881, 0.258210982891623, -0.162090389780418, 0.871234673965391, 0.971575092178001  
"13788", "STYX", 47.0230555395249, -0.0527302327497014, 0.319840798889801, -0.164863997753673, 0.869051030209763, 0.971575092178001  
"13789", "CDKN3", 7.58683417188089, 0.0965496046322918, 0.571732369745673, 0.168872027790276, 0.865897301760059, 0.971575092178001  
"13790", "BATF", 4.31029088758253, -0.139575453882447, 0.823005326529932, -0.169592406492609, 0.865330694781491, 0.971575092178001  
"13791", "FAH", 30.7492306807058, -0.063931195601174, 0.377807904284207, -0.169216140997097, 0.865626634191349, 0.971575092178001  
"13792", "AC012291.3", 4.54705584278522, -0.117327930268335, 0.7159520164337, -0.163876806790445, 0.869828125741627, 0.971575092178001  
"13793", "CHTF18", 12.4566696701372, 0.090876990876869, 0.558731293068527, 0.162648829597098, 0.870794938406606, 0.971575092178001  
"13794", "NTHL1", 92.4573573841953, 0.0534922015040321, 0.321224799630324, 0.166525752574498, 0.867743218480745, 0.971575092178001  
"13795", "BOLA2", 110.236702536524, -0.0490622362856548, 0.301354030412257, -0.162805973487519, 0.870671204860993, 0.971575092178001  
"13796", "CKLF", 365.702481907143, -0.0414637529926699, 0.247019578518319, -0.167856140154474, 0.86669645554621, 0.971575092178001  
"13797", "UTP4", 55.0523343013859, -0.0396294957765924, 0.232806699718504, -0.170224893976462, 0.864833274856682, 0.971575092178001  
"13798", "TMEM231", 20.2463946584524, 0.0626780142215219, 0.377667446591282, 0.165960859976775, 0.868187752166936, 0.971575092178001  
"13799", "ACAP1", 26.2212504906487, -0.054614096411153, 0.335092704246628, -0.162982051590586, 0.870532566464348, 0.971575092178001  
"13800", "AC087501.4", 3.04107414813647, 0.146344808835208, 0.879662709093822, 0.16636468423899, 0.867869964515757, 0.971575092178001  
"13801", "COX10", 24.5323762949179, -0.0522963495200702, 0.319445132405236

, -0.163709958972638, 0.869959477202286, 0.971575092178001  
"13802", "PGAP3", 28.8232337940985, -0.0554530829715366, 0.336707553944303  
, -0.164692126214398, 0.869186314724105, 0.971575092178001  
"13803", "ORMDL3", 62.8924010407071, -0.0352554099545324, 0.20978373184973  
5, -0.168055976713129, 0.866539242187936, 0.971575092178001  
"13804", "AC025048.2", 3.72232205553385, -0.124121064522848, 0.74411573962  
9889, -0.166803439186199, 0.867524712522669, 0.971575092178001  
"13805", "TAC01", 78.3689030698291, -0.0482457915531665, 0.293375103824198  
, -0.164450871680227, 0.869376218839773, 0.971575092178001  
"13806", "LIMD2", 30.2214369561027, -0.0572795457934678, 0.353341058979649  
, -0.162108377551353, 0.871220509127673, 0.971575092178001  
"13807", "UNK", 87.3321280382429, 0.0338474301502473, 0.203508517567014, 0.  
166319476722155, 0.86790553930352, 0.971575092178001  
"13808", "RIOK3", 245.392718859423, 0.0409992075747179, 0.242128678186406,  
0.169328176578712, 0.865538514270051, 0.971575092178001  
"13809", "DYM", 161.07613482894, 0.0314156994762744, 0.184927984204088, 0.1  
69880722009081, 0.865103942348871, 0.971575092178001  
"13810", "RAB27B", 7.18791841414501, -0.143287270355002, 0.845837990435944  
, -0.169402736664917, 0.865479871068973, 0.971575092178001  
"13811", "TIMM21", 68.04769497818, -0.0355616280054247, 0.213172464131087,  
-0.166820926663196, 0.867510952320572, 0.971575092178001  
"13812", "ARHGAP45", 12.1642296821045, 0.112281406304535, 0.65962157087268  
2, 0.170220943738979, 0.86483638135586, 0.971575092178001  
"13813", "GET3", 437.025668983037, -0.0421532573426162, 0.252566371483389,  
-0.166899722615639, 0.867448951408625, 0.971575092178001  
"13814", "SYDE1", 112.045813891165, 0.0396878173075562, 0.243615606713848,  
0.162911637078217, 0.870588008174074, 0.971575092178001  
"13815", "SMIM7", 478.446482653719, 0.0388946260939865, 0.23386948956566, 0.  
.166309107554907, 0.867913699066652, 0.971575092178001  
"13816", "ZNF780B", 31.189550954122, -0.0539721460344043, 0.31679818473578  
8, -0.170367598789802, 0.864721052021426, 0.971575092178001  
"13817", "CD79A", 2.5578973272314, -0.149461267800887, 0.920054302287012, -  
0.162448311397888, 0.87095282904615, 0.971575092178001  
"13818", "ERF", 90.7583713678255, 0.0431833090185179, 0.265769861308364, 0.  
162483845255929, 0.870924848848769, 0.971575092178001  
"13819", "PRR12", 99.7425448261185, 0.0397072219532776, 0.241916455158695,  
0.164136093707351, 0.86962400844285, 0.971575092178001  
"13820", "SH3BP1", 11.313954485834, 0.0742486043935435, 0.44763407104819, 0.  
.165868974673178, 0.868260063861481, 0.971575092178001  
"13821", "AL121672.2", 7.39363824194411, 0.0908444332906011, 0.54833951717  
4784, 0.165671870155665, 0.86841518445903, 0.971575092178001  
"13822", "CXorf38", 79.6947854251099, 0.0377499104141016, 0.23273167514972  
2, 0.162203577960826, 0.871145542308141, 0.971575092178001  
"13823", "ARMCX5", 32.1201987175824, 0.0512884915280086, 0.300158195258015  
, 0.170871534871541, 0.864324779342724, 0.971575092178001  
"13824", "WDR35", 49.842684858718, -0.0461116972983316, 0.284872360183649,  
-0.161867923123902, 0.87140986329171, 0.971700162228133  
"13825", "FAM189B", 38.9876171459935, -0.0515896705267206, 0.3195222924040  
36, -0.161458751871639, 0.87173209629653, 0.971824071117753  
"13826", "CDC42SE2", 93.2008876029444, 0.0296711421585895, 0.1844578583691

55,0.160855939784407,0.872206865266125,0.971824071117753  
"13827","THOC3",58.9285727837121,-0.0457346665764839,0.284337720150044  
,-0.16084628712768,0.872214467980157,0.971824071117753  
"13828","LTV1",149.270031044038,0.0349470784824189,0.216465744726893,0  
.161443920498878,0.871743776788518,0.971824071117753  
"13829","LY6K",14.9687609849886,0.0883265778105555,0.548510106650723,0  
.161029991498041,0.872069779085066,0.971824071117753  
"13830","UQCC3",226.640528334484,-0.0414284705214219,0.25682630970098,  
-0.161309293310551,0.871849804112288,0.971824071117753  
"13831","AC009779.2",47.9182241595388,0.0544203076369434,0.33704207464  
3832,0.161464433467103,0.871727621746435,0.971824071117753  
"13832","ZFAND6",306.128862175543,0.0299844928140675,0.186227898937893  
,0.161009671403034,0.872085783350119,0.971824071117753  
"13833","DUS2",21.5064730790113,0.0576382169527555,0.357808546532662,0  
.161086752989267,0.872025073570069,0.971824071117753  
"13834","AJ009632.2",2.41056449397287,0.216226735089361,1.342546490529  
58,0.161057167565249,0.872048375084776,0.971824071117753  
"13835","AC007325.4",36.2162601837042,0.0771578403996002,0.47930551115  
4519,0.160978412732513,0.872110403024648,0.971824071117753  
"13836","ARL17A",30.0573412382416,-0.0706193214626004,0.43937137153426  
, -0.160728090262235,0.872307564236497,0.971857552956462  
"13837","AC022915.1",3.10362753025525,-0.170347945865306,1.06177720160  
328,-0.160436620421009,0.872537144301848,0.972043078659607  
"13838","ARMC2",21.5129390135176,0.0653150356921373,0.407324644641877,  
0.16035129853133,0.872604351245976,0.972047700134176  
"13839","ATP6V1FNB",3.037079461337,0.139739436455123,0.873931420447263  
,0.159897485301086,0.872961829472275,0.972318388309625  
"13840","CAMK1D",391.302295159649,-0.0450712190042502,0.28215502361613  
6,-0.159739204450842,0.873086516732358,0.972318388309625  
"13841","PPP1R13B",4.76612382142292,-0.111607603069016,0.6986340464520  
35,-0.159751165343011,0.8730777094314512,0.972318388309625  
"13842","UBB",3502.98381629343,0.0441603404543746,0.276481597293452,0.  
159722530854391,0.873099651701708,0.972318388309625  
"13843","CCDC163",2.47312521454788,0.153170088891116,0.961786163684965  
,0.159255866505985,0.873467290340338,0.972376563919716  
"13844","NEDD9",87.7199069364781,0.0493324151910187,0.309610110138649,  
0.159337223093027,0.873403195571288,0.972376563919716  
"13845","ZMIZ2",75.3606585926862,-0.0432949448682928,0.271808763675579  
, -0.159284580389645,0.873444668724497,0.972376563919716  
"13846","CCDC171",50.246010353037,-0.0504234594116167,0.31639997031437  
7,-0.159366195140649,0.873380370862823,0.972376563919716  
"13847","MRPL10",168.131336314109,0.0430954853253644,0.270176996479419  
,0.159508344111181,0.873268384833984,0.972376563919716  
"13848","STX18",127.185517513224,0.0283859266536233,0.178464717972753,  
0.159056237984009,0.873624566237616,0.972481418872968  
"13849","HENMT1",21.1895798443549,0.0626469120444751,0.3945574830323,0  
.158777655319102,0.8738440539352,0.972515464938649  
"13850","AL160408.2",2.61769966696381,-0.144100895646916,0.90700139699  
7809,-0.158876156226322,0.873766446641601,0.972515464938649  
"13851","PSMD1",282.34668628391,-0.0246927014498054,0.155561293660142,

-0.158732939723116,0.873879285040626,0.972515464938649  
"13852","OSBPL7",8.51532903148723,0.0989748775883945,0.623742662968786  
,0.158679024964094,0.873921764434807,0.972515464938649  
"13853","AC119403.1",5.73297069943583,-0.0966085584286239,0.6090679356  
10618,-0.158617048739841,0.87397059589978,0.972515464938649  
"13854","JOSD2",362.601393654442,-0.0410432719939938,0.258906275927104  
, -0.158525597137513,0.874042652081098,0.972525442603589  
"13855","TMEM218",129.164162288491,0.0463521193459728,0.29281959373282  
7,0.158295825614269,0.874223697350369,0.97265667951324  
"13856","CCNE2",2.66528886656857,0.152921449628615,0.96742137924183,0.  
158071191013434,0.874400701419183,0.972713199998319  
"13857","CSKMT",138.809453662045,-0.0372930953839044,0.235836522214598  
, -0.158131128434678,0.874353472249781,0.972713199998319  
"13858","CHSY1",86.0303409210989,-0.042643009564383,0.269946510144255,  
-0.157968367665118,0.874481724654762,0.972733135052183  
"13859","ZCCHC17",263.482368846417,-0.032930376141275,0.20903505615590  
7,-0.15753518451333,0.874823080835421,0.972837434058871  
"13860","FAM102B",170.29344990263,0.0525257301836765,0.334058681445936  
,0.157235040132245,0.875059613717861,0.972837434058871  
"13861","LINC01118",5.50697156961166,-0.101768344149103,0.647319611899  
99,-0.157214986659212,0.875075417529474,0.972837434058871  
"13862","MYMX",3.14247053350682,-0.131924512611194,0.841836216195561,-  
0.156710426652097,0.875473069337363,0.972837434058871  
"13863","TMED4",449.482897807143,0.0234072389741127,0.148561684223815,  
0.157559057683061,0.874804267737548,0.972837434058871  
"13864","TMEM273",6.91405437853248,-0.100858382146819,0.64226296046251  
6,-0.157035962457164,0.875216505759895,0.972837434058871  
"13865","BNIP3",336.950290475051,-0.0324212311097673,0.206440152225715  
, -0.157049056398287,0.875206186344755,0.972837434058871  
"13866","ZFHX2",11.1766470929499,0.0856772226187899,0.543483443322081,  
0.1576445863651,0.874736867990694,0.972837434058871  
"13867","MAP4K5",266.646028833122,0.0297780487127462,0.189286941504773  
,0.157316973247176,0.874995044098038,0.972837434058871  
"13868","AC011330.2",3.37126485346035,0.13652339971325,0.8698702208465  
18,0.156946859935487,0.875286728565972,0.972837434058871  
"13869","CASC4",500.844642782227,0.0235183440969607,0.149918032330154,  
0.156874684995651,0.875343611254091,0.972837434058871  
"13870","PALB2",31.0023616753235,0.0455388682071583,0.289427191827408,  
0.157341360774126,0.874975825004789,0.972837434058871  
"13871","CENPN",9.79799796334609,-0.0918185552762001,0.586145081464062  
, -0.15664817155312,0.875522135757296,0.972837434058871  
"13872","MRPS7",245.28555087592,0.0356988279039905,0.227646551178335,0.  
.156816906380561,0.875389148340118,0.972837434058871  
"13873","ZNF573",29.0748153592632,-0.0493724582534133,0.31500152387834  
1,-0.156737204460261,0.875451964527691,0.972837434058871  
"13874","WIPF3",2.62290762906425,-0.151766235407627,0.97039156799949,-  
0.15639690245918,0.875720178611918,0.972917229066863  
"13875","ARMCX5-  
GPRASP2",25.0456776459219,-0.0482613225848188,0.308551837538905,-0.156  
412364838805,0.875707991397602,0.972917229066863

"13876", "SDR42E2", 20.5938917841849, 0.0629825292203329, 0.402988513410111, 0.156288646262821, 0.875805505337803, 0.972941904351559  
"13877", "BTD", 194.542287934277, -0.0453413295412738, 0.290823784967061, -0.155906538202882, 0.876106691592664, 0.973091369212504  
"13878", "FIP1L1", 311.033766901642, -0.0249383594093729, 0.160151265618328, -0.155717529381291, 0.87625567927595, 0.973091369212504  
"13879", "SQSTM1", 1920.11845913884, -0.0234348444907265, 0.150437499269377, -0.155777945023957, 0.876208055695588, 0.973091369212504  
"13880", "TNFRSF6B", 11.3631227300046, -0.0782397912838036, 0.502371938169088, -0.155740767625181, 0.876237361311753, 0.973091369212504  
"13881", "ST13", 1252.63820495449, -0.0273011401042196, 0.175103437252731, -0.155914358578897, 0.876100527214595, 0.973091369212504  
"13882", "LIMS1", 938.667904565501, -0.0238398626739144, 0.153423332741242, -0.155386160944123, 0.876516893620608, 0.973117145524408  
"13883", "AL590428.1", 8.29912780670463, -0.088952650425421, 0.573120461021626, -0.155207598533224, 0.87665765811855, 0.973117145524408  
"13884", "FDXACB1", 9.18004790408627, 0.0835839348875503, 0.537854400425243, 0.155402530538872, 0.876503989320709, 0.973117145524408  
"13885", "CLIP3", 101.183858527675, 0.0373996258720349, 0.240447349308742, 0.155541851384739, 0.876394162764203, 0.973117145524408  
"13886", "IQSEC2", 46.6980711872615, 0.0436628707704518, 0.281180546094388, 0.155284109718582, 0.876597342266627, 0.973117145524408  
"13887", "ABC7", 111.266659239071, -0.0338713685735759, 0.218215974813041, -0.155219472830051, 0.876648297239889, 0.973117145524408  
"13888", "SYNJ2BP", 163.958720526565, 0.0253895210754121, 0.163768710481521, 0.15503279595205, 0.876795462442684, 0.973200032657977  
"13889", "PTPRC", 55.3514131266891, 0.0869956288864802, 0.562805192893266, 0.154575028775505, 0.877156357501366, 0.973374210410994  
"13890", "MARK4", 66.7322480098139, 0.0336958844456461, 0.218037723074057, 0.15454153515537, 0.877182764246975, 0.973374210410994  
"13891", "SNRPB2", 510.505903469359, -0.0284786611228275, 0.184289118826526, -0.15453251556124, 0.877189875419466, 0.973374210410994  
"13892", "KRTAP13-4", 4.15120015238598, 0.153629683638931, 0.994280798306021, 0.154513376805298, 0.877204964711614, 0.973374210410994  
"13893", "PTBP2", 88.6826233282516, 0.03815418948732, 0.247177613961148, 0.154359405270888, 0.877326359881467, 0.97337955757234  
"13894", "PLXNA2", 30.6316014437577, -0.0502051297170871, 0.325757829771475, -0.154117952444326, 0.877516733390381, 0.97337955757234  
"13895", "PEX3", 81.4318793987651, -0.0372494358926439, 0.241728934204652, -0.154095892637775, 0.87753412680075, 0.97337955757234  
"13896", "EXD2", 50.0499949470608, 0.0423278519136644, 0.274311312383085, 0.154305892622292, 0.877368551323805, 0.97337955757234  
"13897", "AMFR", 182.004914149251, -0.0259373673654081, 0.16839522614723, -0.154026737923857, 0.877588653333791, 0.97337955757234  
"13898", "SLC35C2", 190.567646617191, -0.0311602200815053, 0.20209725626116, -0.154184280667515, 0.877464436188959, 0.97337955757234  
"13899", "PINK1-AS", 3.95768460432665, 0.110665942971705, 0.721866669627173, 0.153305239912049, 0.878157568670927, 0.973422741379567  
"13900", "IP013", 32.6078950581987, -0.0433738227033524, 0.28379223590365,

-0.152836537494557,0.878527183460007,0.973422741379567  
"13901","C2orf76",109.712594557533,-0.0443771033682945,0.2907198849605  
77,-0.152645572814231,0.878677784198963,0.973422741379567  
"13902","R3HDM1",68.32828434774,-0.0341047603097049,0.222281010769562,  
-0.153430831503017,0.878058532705587,0.973422741379567  
"13903","PASK",5.31220755741141,0.109440929556179,0.718599510221911,0.  
152297528733887,0.878952273969632,0.973422741379567  
"13904","ING5",92.5365551944028,0.0292367388752446,0.190475868564389,0.  
153493138504111,0.87800940087265,0.973422741379567  
"13905","FANCD2",3.65826379549584,0.115565445695639,0.76073725464376,0.  
.151912430987433,0.879256003580543,0.973422741379567  
"13906","LINC02202",35.3957963869701,-0.0464553565020094,0.30483987835  
7229,-0.152392648732035,0.878877254823189,0.973422741379567  
"13907","AL139274.2",6.88657955319978,0.0922372991555504,0.60351202641  
4868,0.152834235472458,0.878528998880704,0.973422741379567  
"13908","PHF14",381.766805571659,0.0217889168893426,0.14275199971271,0.  
.152634757714029,0.87868631345774,0.973422741379567  
"13909","ZNF775",47.9579520281235,0.0461451928566507,0.302018399151567  
,0.152789343252869,0.878564401911155,0.973422741379567  
"13910","TPRN",28.0193494190814,-0.0446283031279136,0.292243657500949,  
-0.152709227326067,0.878627583765543,0.973422741379567  
"13911","CASC2",10.6087293857545,0.0795780348471198,0.52375459507177,0.  
.151937635671178,0.879236123905015,0.973422741379567  
"13912","EEF1G",5352.26875296881,-0.0341424633068277,0.224052914586131  
, -0.152385713749341,0.878882724261766,0.973422741379567  
"13913","PRH1",78.0178586189491,-0.0310780932704208,0.204787710334702,  
-0.151757608987509,0.879378117915686,0.973422741379567  
"13914","GAS6",1102.65640182829,0.0467447780712795,0.303815765715257,0.  
.15385896107541,0.877720943039669,0.973422741379567  
"13915","HAUS2",62.0288428117783,0.0422612050739133,0.277539997289273,  
0.152270683457079,0.87897344647277,0.973422741379567  
"13916","FAM227B",6.82588910864938,-0.0928775901015844,0.6103746417502  
26,-0.152164889804828,0.879056885323719,0.973422741379567  
"13917","EFL1",34.0902121796278,-0.0421262263929904,0.27455095807364,-  
0.153436821668971,0.878053809173729,0.973422741379567  
"13918","KCTD13",33.9257435632299,-0.0427075926567315,0.28146117895426  
1,-0.151735286604735,0.879395724713062,0.973422741379567  
"13919","AC027682.6",9.31076151077076,0.0731272659765895,0.48115108192  
0615,0.151983999879386,0.879199555288914,0.973422741379567  
"13920","TVP23B",47.7670204665736,-0.0453043414512835,0.29478631668485  
1,-0.153685360842977,0.877857827997404,0.973422741379567  
"13921","CCDC144NL",2.85204346955588,-0.176141269733457,1.160189223566  
51,-0.151821156545469,0.879327995054823,0.973422741379567  
"13922","JPT1",204.554547056367,0.0358535170432732,0.234494084691017,0.  
.152897319736299,0.87847924959886,0.973422741379567  
"13923","PPP1R37",68.0527872262959,0.0357862897557422,0.23405203908162  
5,0.152898859143294,0.878478035603333,0.973422741379567  
"13924","ZNF324B",11.529795120311,-0.0737704665187008,0.48444952337385  
, -0.152276889457835,0.87896855187705,0.973422741379567  
"13925","GSPT2",92.4192518967641,-0.032528460422976,0.212430639449954,

-0.153125088298006,0.87829963158259,0.973422741379567  
"13926","MAMLD1",7.60474661154939,0.0841481952873248,0.549064243623099  
,0.153257467162782,0.878195240645519,0.973422741379567  
"13927","MTRR",54.616581904706,0.0355769174201069,0.234600798469958,0.  
151648748223091,0.879463982494883,0.973428397369041  
"13928","DCLRE1B",15.1213662744572,-0.0574891266664279,0.3795382251426  
36,-0.151471242836799,0.879603993969908,0.973513466904519  
"13929","P4HTM",195.553031304924,0.0359815521654402,0.238068040193126,  
0.151139783972057,0.879865449883117,0.973593131142649  
"13930","VIPR2",21.8264122190368,-0.171925096824673,1.13746616026677,-  
0.151147438781257,0.879859411594951,0.973593131142649  
"13931","RACGAP1",15.0993209792278,0.0599229417508743,0.39640742179548  
,0.151165034901366,0.879845531400384,0.973593131142649  
"13932","GYS1",23.4088825376224,-0.0490406810538438,0.324725179279031,  
-0.151022107872035,0.879958276354946,0.973625956790948  
"13933","CPNE8-  
AS1",2.39641247278639,0.1469301366835,0.975548210553665,0.150612891391  
714,0.880281091543947,0.973913229466012  
"13934","WDFY4",6.24273090848972,0.0878387936325629,0.584339046798472,  
0.150321622547427,0.880510874489968,0.973957744708873  
"13935","CD63",12753.8370331232,-0.0417414443921923,0.277508614193396,  
-0.150414950229627,0.880437246879248,0.973957744708873  
"13936","CRYL1",292.530977663123,-0.0424371505493229,0.28226961379188,  
-0.150342610312324,0.880494316836854,0.973957744708873  
"13937","AL080317.2",6.74182237630483,0.116323882892562,0.775184940810  
873,0.150059523564639,0.880717653837287,0.974082753524202  
"13938","TMEM50B",245.355102736035,0.0226216988643214,0.15080385991442  
2,0.150007426051022,0.880758756415501,0.974082753524202  
"13939","ZBED4",29.8944338659575,0.0580288574264837,0.387018788618646,  
0.149938088622522,0.880813461003818,0.974082753524202  
"13940","PSMA3-  
AS1",227.824887578278,-0.0314030533881154,0.209761313213228,-0.1497085  
08719114,0.880994594854899,0.974166801865987  
"13941","ZNF575",19.5349319950726,0.0514376248812854,0.34383070838172,  
0.149601602263459,0.881078943988287,0.974166801865987  
"13942","FBLN1",9225.2504476059,-0.0386117831365755,0.258097621569138,  
-0.149601468242249,0.881079049731793,0.974166801865987  
"13943","AC009506.1",13.3927188387601,-0.0712906368799808,0.4783909849  
40999,-0.149021697992016,0.881536511614159,0.97432950641916  
"13944","PRMT3",37.9382615977702,0.0434418310794827,0.291599483610036,  
0.148977736660119,0.881571200474799,0.97432950641916  
"13945","LINC00562",4.91364418427925,0.115643537297059,0.7759737157629  
34,0.149030224797446,0.881529783337381,0.97432950641916  
"13946","PRORP",57.0569530322188,-0.0331160770875756,0.221992877617973  
, -0.149176304406329,0.881414517107623,0.97432950641916  
"13947","TOMM34",32.0854089568542,-0.0416225231182338,0.27946895226160  
3,-0.148934337003819,0.881605446353191,0.97432950641916  
"13948","CHEK2",79.5544100484598,0.0403689546338292,0.270791519106062,  
0.14907761796638,0.881492386796343,0.97432950641916  
"13949","CHRD",81.4326862876343,-0.0428290631168157,0.288011666155157,

-0.148706001005331,0.881785625775606,0.974409948136765  
"13950","C5orf30",32.6690369182585,0.0477375305812507,0.32137163832692  
7,0.148543072530526,0.881914196009133,0.974409948136765  
"13951","TSPYL1",303.972111503392,-0.0302556081556573,0.20382166002658  
, -0.14844157461828,0.881994291686817,0.974409948136765  
"13952","NSUN6",67.2375743136935,-0.0363850723285898,0.244942780259327  
, -0.148545192024309,0.881912523452714,0.974409948136765  
"13953","CUEDC1",174.293856762036,-0.0308455411590234,0.20776155987990  
4, -0.148466064544633,0.881974965688688,0.974409948136765  
"13954","AC073111.4",39.0511779147652,0.0421108499841392,0.28390864979  
6101,0.148325350475875,0.882086009848,0.974441439143394  
"13955","GPATCH11",126.100326752686,0.0313239739941696,0.2115963343996  
33,0.14803646803734,0.882313987970703,0.974553605944998  
"13956","ACVR1",226.228950453274,-0.0332646065365957,0.224651263216757  
, -0.148072198928612,0.882285789599406,0.974553605944998  
"13957","EEA1",1171.64100429001,0.0257590000529664,0.174120148372858,0  
.147938077779526,0.882391637099017,0.97456954115364  
"13958","HSD11B2",47.0454163166977,0.0803345002096861,0.54337394502531  
7,0.147843857706396,0.882465996196619,0.97458184061978  
"13959","DMRT2",57.8010887095032,0.0547388341733784,0.370491500258288,  
0.147746531661906,0.882542807634715,0.974596846456704  
"13960","DHRS3",867.489853062613,-0.0406640323690734,0.275672422270019  
, -0.147508524916008,0.882730651425784,0.974664636611164  
"13961","RNF14",87.9080443305782,0.0310746153198836,0.210625534628824,  
0.147534891126306,0.8827098419053,0.974664636611164  
"13962","NCF1",6.78119741777986,-0.107629350097754,0.730264027003908,-  
0.147384159862469,0.882828807583397,0.974703199319443  
"13963","SEMA4A",94.5503520618751,0.108693114791717,0.739458709930433,  
0.146990106860655,0.883139829082125,0.974767325311539  
"13964","CPVL",249.477225864412,-0.055189585829315,0.375413923702713,-  
0.147009959793125,0.883124158959683,0.974767325311539  
"13965","AP000880.1",3.58650792096892,-0.126089886642452,0.85741436637  
92,-0.14705828545295,0.883086015213793,0.974767325311539  
"13966","SIPA1L1",28.2938809636154,-0.0558840766662491,0.3795798593579  
65,-0.147226137763931,0.882953530440212,0.974767325311539  
"13967","THAP3",84.4013827823742,0.0445895529497665,0.303910889648068,  
0.146719168245013,0.883353688267625,0.974786094780197  
"13968","ATPAF1",112.538855035327,0.0310922660064608,0.212352274053491  
,0.146418333144992,0.88359115551745,0.974786094780197  
"13969","SH3PXD2B",302.960205860649,-0.0475695551160111,0.325089269107  
611,-0.146327669463198,0.883662723870157,0.974786094780197  
"13970","RNGTT",52.1959498577827,-0.0382959301390707,0.261221539839521  
, -0.146603263125228,0.88344517791425,0.974786094780197  
"13971","AL158152.1",67.3891728932422,-0.0427427448552662,0.2920768723  
43213,-0.146340737328357,0.883652408263343,0.974786094780197  
"13972","INPP5E",48.3601938310238,-0.0454722716689215,0.31027609115240  
1,-0.146554223691655,0.883483887633987,0.974786094780197  
"13973","FBXL19-  
AS1",10.312105085768,-0.0897902089596728,0.612114205943567,-0.14668865  
3992701,0.883377774526144,0.974786094780197



"13974", "KCNE5", 3.31582569526544, 0.123699167596772, 0.844158154109315, 0.146535536018472, 0.883498638990786, 0.974786094780197  
"13975", "SUB1", 1202.24545490665, 0.0358354206136222, 0.24506185792131, 0.146230102544677, 0.883739742579985, 0.97480129745048  
"13976", "LRR8B", 10.7528307303778, -0.0664862805534284, 0.455788077389984, -0.145871039308782, 0.884023194290391, 0.974806063886254  
"13977", "TBC1D14", 71.1897704406074, -0.0354615541048993, 0.24358174503327, -0.145583792004018, 0.884249963757476, 0.974806063886254  
"13978", "TMEM33", 129.18664258878, -0.0291570783421328, 0.200179520281276, -0.145654651890282, 0.884194022024717, 0.974806063886254  
"13979", "ZFAT", 13.5388606943314, 0.0691122024047493, 0.473931847877925, 0.145827301360324, 0.884057722918081, 0.974806063886254  
"13980", "ATAD1", 178.906726878988, -0.0269400272006791, 0.184453212454853, -0.146053445435508, 0.883879197382771, 0.974806063886254  
"13981", "MRPL21", 315.929528953822, -0.0368231505612684, 0.252542834724059, -0.145809524160538, 0.884071757071208, 0.974806063886254  
"13982", "CTDPL2", 143.258644889824, -0.0265805730769715, 0.18246138230142, -0.145677801744708, 0.884175746041329, 0.974806063886254  
"13983", "ZNF285", 3.37485101021433, 0.111508155157362, 0.764374694476734, 0.145881536847183, 0.884014907112455, 0.974806063886254  
"13984", "ADA2", 13.0330643083628, -0.0736392279590405, 0.50681947516573, -0.145296760616708, 0.884476572239645, 0.974986152822807  
"13985", "STX2", 219.026404760151, -0.0293887575595988, 0.202833017755031, -0.144891388418293, 0.884796625733119, 0.975269215993996  
"13986", "MRPS24", 773.450487204337, 0.0366516730095273, 0.253667034261631, 0.144487332050111, 0.885115659046708, 0.975342079092831  
"13987", "ZKSCAN5", 24.282554868077, 0.0511947680140594, 0.354320610017817, 0.144487129923052, 0.885115818646099, 0.975342079092831  
"13988", "TMC8", 7.96232395249243, 0.10486261669957, 0.725351179615256, 0.144568065299338, 0.885051912499577, 0.975342079092831  
"13989", "EFCAB6", 3.74455517862654, 0.108307353541358, 0.749513946313848, 0.144503453303331, 0.885102929730892, 0.975342079092831  
"13990", "ARHGEF10L", 126.802325778609, -0.0303697417065532, 0.210459969705677, -0.144301748921776, 0.885262197323175, 0.97541603618589  
"13991", "LOH12CR2", 18.8953593673628, 0.053367760044854, 0.369988023144309, 0.144241858402099, 0.885309488308582, 0.97541603618589  
"13992", "LNCTAM34A", 6.25412104862067, 0.0968338116027966, 0.67512659936675, 0.143430597599968, 0.885950119401771, 0.975462259150484  
"13993", "CCDC28B", 111.962145615792, 0.045473802397096, 0.315805795735081, 0.143992931767606, 0.885506051103152, 0.975462259150484  
"13994", "DARS", 279.581884768345, 0.019887101113592, 0.138202706518271, 0.143898058255196, 0.885580969018364, 0.975462259150484  
"13995", "CRBN", 377.217806182233, 0.0252935265576361, 0.176084124083563, 0.143644560174163, 0.885781151588968, 0.975462259150484  
"13996", "ABHD6", 31.0092238866595, -0.0425183887613554, 0.296365210885169, -0.14346619373564, 0.885922008512787, 0.975462259150484  
"13997", "AC008549.2", 8.12149095271852, 0.0942436684309595, 0.65544438031726, 0.143785912675211, 0.885669527331189, 0.975462259150484  
"13998", "UBXN2B", 35.0033408410264, -0.0490792959829239, 0.34211804498677, -0.143457197602137, 0.885929112902714, 0.975462259150484

"13999", "SEC23IP", 102.343829515545, -0.0272399482873873, 0.1899358154419  
59, -0.143416596938303, 0.885961176007729, 0.975462259150484  
"14000", "MRPS35", 145.982790692359, -0.0306860361017266, 0.21400791426636  
4, -0.143387389232407, 0.885984241995843, 0.975462259150484  
"14001", "HLF", 110.665232334644, -0.0673952924587853, 0.468027561134112, -  
0.143998554904491, 0.885501610763228, 0.975462259150484  
"14002", "RAPGEF2", 70.4415376310095, -0.0355463314157244, 0.2481278106672  
4, -0.143258151192875, 0.886086305367394, 0.975504956237565  
"14003", "RPL7", 8966.03718940051, -0.0288973342976002, 0.202205463901716,  
-0.142910748997594, 0.886360669242161, 0.975597980461829  
"14004", "PGM5-  
AS1", 2.4210604340435, -0.150636541232243, 1.05354378879394, -0.1429808070  
95532, 0.886305339158565, 0.975597980461829  
"14005", "CHCHD1", 279.969479843958, 0.0377949218820151, 0.264281887641358  
, 0.14300988319451, 0.886282375766267, 0.975597980461829  
"14006", "AC097662.1", 11.5478075486537, 0.066378428002304, 0.465391016709  
474, 0.142629371042934, 0.886582899890512, 0.975772911738701  
"14007", "AGK", 40.1742361578104, 0.0363962908106695, 0.255697222757127, 0.  
142341361467349, 0.886810377390492, 0.975953592309162  
"14008", "MRPS16", 277.694459536985, -0.0269835715104817, 0.19028817784302  
8, -0.141803720106779, 0.887235045546256, 0.975965457244662  
"14009", "SAMD4A", 169.757885023815, -0.0347627312459348, 0.24508588570335  
3, -0.141838976757768, 0.887207196291916, 0.975965457244662  
"14010", "MGRN1", 92.5347945382625, -0.032163146202897, 0.226784363312053,  
-0.141822591880556, 0.88722013870106, 0.975965457244662  
"14011", "TIMM22", 123.413094312948, 0.0421152223799074, 0.297172516094613  
, 0.141719775884318, 0.887301353709166, 0.975965457244662  
"14012", "AC022706.1", 8.84886622614005, -0.0933828020589598, 0.6570596285  
40771, -0.142122264103105, 0.886983432469175, 0.975965457244662  
"14013", "P3H4", 140.796321177597, -0.0348617862637628, 0.245406198439347,  
-0.142057480558622, 0.88703460308764, 0.975965457244662  
"14014", "ZNF343", 23.4631206991106, 0.0513867236233847, 0.362249718793015  
, 0.141854419637925, 0.88719499799347, 0.975965457244662  
"14015", "BLCAP", 179.437634321649, 0.0334646272605467, 0.236187877362877,  
0.141686472795265, 0.887327660284394, 0.975965457244662  
"14016", "SLC4A3", 3.75874391985079, 0.139033940133322, 0.982144674059439,  
0.141561568071903, 0.887426325375668, 0.976004138848205  
"14017", "TTF1", 131.484798607563, 0.0330323691076191, 0.233474590122709, 0.  
.141481645134308, 0.887489459243288, 0.976004138848205  
"14018", "TMX4", 432.013480585749, -0.0220883358806845, 0.156210410559526,  
-0.1414011767946, 0.887553024663952, 0.976004413981654  
"14019", "PLPPR2", 89.0104357291918, -0.0284772898860187, 0.20166630714426  
6, -0.141209953656993, 0.887704082988929, 0.976100894448559  
"14020", "ITPR1", 27.0223481341496, -0.0608009785248624, 0.431368548595698  
, -0.140949030064425, 0.887910208353331, 0.976126971952781  
"14021", "AC093627.5", 6.40105855415268, -0.082549583568334, 0.58570951947  
9376, -0.140939460300578, 0.887917768454226, 0.976126971952781  
"14022", "CD300E", 3.41718571363056, 0.15315866460744, 1.08594511128904, 0.  
141037206222732, 0.887840549783791, 0.976126971952781  
"14023", "EEF1AKMT3", 49.6669871231097, 0.0347297861454711, 0.246691338340

935,0.14078234922652,0.888041887454171,0.976193802688871  
"14024","LMBR1",64.270039340952,0.0330836054042668,0.235417067302364,0  
.14053188999154,0.888239757920236,0.97629780916971  
"14025","TRPA1",2.59546872374905,0.152484564122867,1.08528196618756,0.  
140502255518465,0.888263170522555,0.97629780916971  
"14026","COPZ1",432.279053527849,0.0369410140996112,0.263093871608731,  
0.140410013634028,0.888336046495074,0.976308295787934  
"14027","CPLANE2",5.04291278503333,-0.0871095061997953,0.6216018430703  
03,-0.140137142723921,0.88855163448509,0.976385030712046  
"14028","RETSAT",81.6122232391642,0.0322808288071534,0.230443800601528  
,0.140081133547055,0.888595886854316,0.976385030712046  
"14029","GXYLT1",76.3997079335302,-0.0313535727381954,0.22370977870641  
1,-0.140152893268661,0.888539190177637,0.976385030712046  
"14030","TCEAL9",894.540707378433,-0.0320711280083684,0.22913678623086  
4,-0.139964990065173,0.888687651927372,0.976416261900245  
"14031","ABTB1",168.17409999386,0.0254936044555427,0.182498293460738,0  
.139692289566682,0.888903118705941,0.976429690965406  
"14032","PIGX",100.329288274778,-0.0274960296671406,0.19672814087773,-  
0.139766631984947,0.888844378279817,0.976429690965406  
"14033","STKLD1",4.72225146470806,-0.0998239827894145,0.71492376781971  
7,-0.139628848952448,0.888953245735226,0.976429690965406  
"14034","SRSF6",396.116409717564,0.0300122566440139,0.21477565494847,0  
.139737702819319,0.888867236106673,0.976429690965406  
"14035","BIN2",7.35849084026573,0.0939590523161779,0.673457841196624,0  
.13951734847905,0.889041347904767,0.976456884784608  
"14036","VMA21",127.832078103528,-0.02500373287245,0.179800441132091,-  
0.139063801595909,0.889399732375846,0.976780911554122  
"14037","KIAA1586",99.1791828727321,-0.0277162870509877,0.200234342421  
622,-0.138419247746358,0.889909085937917,0.976950826218501  
"14038","CLIP1",516.965908653997,0.0325049689980033,0.234321938350419,  
0.138719273264945,0.889671987487687,0.976950826218501  
"14039","DUOX2",2.78985908905347,-0.16970548209068,1.22631239197361,-0  
.138386828023126,0.889934706568939,0.976950826218501  
"14040","PGS1",48.0431640284834,0.0350533664271028,0.253162317599293,0  
.13846202215049,0.889875282394495,0.976950826218501  
"14041","SELEN00",72.8308492576404,-0.0279756684032006,0.2017331419009  
94,-0.138676610791748,0.889705701372802,0.976950826218501  
"14042","UPRT",37.1257393263352,-0.0431012453415267,0.311115905392383,  
-0.138537582278755,0.889815569601249,0.976950826218501  
"14043","ARCN1",265.769960775457,-0.0215903369300201,0.156166460445984  
, -0.138252073257996,0.890041201680504,0.976998157367014  
"14044","AL160006.1",14.7195976811838,0.0634702185486386,0.45984063390  
8651,0.138026555002634,0.890219430552294,0.977054647345219  
"14045","C1orf53",7.71779784246877,-0.0772353093160907,0.5593000015530  
42,-0.138092810837881,0.890167067462528,0.977054647345219  
"14046","ZBTB1",151.760512362896,0.0274300587851725,0.199020760377248,  
0.137825112984084,0.890378636473895,0.977090245692681  
"14047","SNW1",399.778669467747,-0.0253371881998683,0.183761096306672,  
-0.137881133216489,0.890334361489824,0.977090245692681  
"14048","AC104596.1",3.4172629530592,0.11757760625714,0.85422009596556

,0.137643221942979,0.890522394444828,0.977108883932452  
"14049","AC009093.1",26.828900258986,-0.070806166161831,0.514257751880  
514,-0.13768614260633,0.890488471682707,0.977108883932452  
"14050","TIMM9",259.474508957914,-0.0338740143823139,0.246535424685393  
, -0.137400190765854,0.890714480268629,0.977180536142688  
"14051","CACNA1A",26.1165429902248,0.0512445822503075,0.37288753081754  
8,0.137426376628778,0.890693783302532,0.977180536142688  
"14052","RNF115",476.439534857234,0.0205348864047971,0.149745270499589  
,0.137132120008114,0.890926364196098,0.977188094050071  
"14053","AC091978.1",2.60517730145046,0.13048556275093,0.9527781343265  
34,0.13695272598081,0.891068162122364,0.977188094050071  
"14054","POMK",5.32430033766613,-0.0977637381712802,0.713063863878248,  
-0.137103761841973,0.890948779031143,0.977188094050071  
"14055","MSRB2",393.07309637232,0.0330534981971781,0.241761938571696,0  
.136719197374304,0.891252754713455,0.977188094050071  
"14056","AC012470.1",5.51827386726499,0.0927499415084897,0.67849195478  
5123,0.136700134547452,0.891267823177432,0.977188094050071  
"14057","NAB2",64.2432468165031,0.0424476185566839,0.310514682448345,0  
.136700842040682,0.891267263929335,0.977188094050071  
"14058","PLA2G4B",14.2553806028631,0.0642144605584749,0.46765821870688  
1,0.137310664048702,0.890785241586009,0.977188094050071  
"14059","UBL7-  
AS1",47.5916861613666,0.0388430940252924,0.284339862754293,0.136607979  
088947,0.891340669233884,0.977188094050071  
"14060","CHD9",820.199713551321,0.0229909324344615,0.168005042319763,0  
.136846681010342,0.891151984594574,0.977188094050071  
"14061","AP1B1",67.8099998178186,-0.0389495708948754,0.285157904900535  
, -0.136589483319641,0.891355289681352,0.977188094050071  
"14062","TRABD2B",6.29271797969885,0.100644350282606,0.742340580397504  
,0.135577055788481,0.892155644777657,0.977851862621014  
"14063","CYP21A2",6.04258245169096,0.0866609043850261,0.63880927870513  
1,0.135660058915688,0.892090024107852,0.977851862621014  
"14064","NFE2L3",3.1374353563843,-0.146375827855567,1.08024355079992,-  
0.135502616745247,0.892214495476131,0.977851862621014  
"14065","ABCD1",31.4199396872708,0.0467551281694036,0.344929537903978,  
0.135549795049502,0.892177196752677,0.977851862621014  
"14066","AL121821.2",10.296347506801,-0.0795810872995451,0.58805422635  
4259,-0.135329504887536,0.892351358124092,0.977932332253866  
"14067","AL353194.1",11.5636446996259,0.0600575902844458,0.44485651237  
3973,0.13500440841913,0.892608388829511,0.9781444738613  
"14068","AL355488.1",5.18098765193401,-0.0896749240787879,0.6663098438  
42931,-0.134584420307509,0.892940460319915,0.978204091156979  
"14069","ANKMY1",17.7224084547138,0.055366318119334,0.412854935105561,  
0.134105985932269,0.893318766313826,0.978204091156979  
"14070","TIPARP-  
AS1",6.95482223077626,-0.0769620634983758,0.572119071228272,-0.1345210  
59284298,0.892990559534141,0.978204091156979  
"14071","RUBCN",45.790519316222,0.0436460468086733,0.325310359079418,0  
.134167405342349,0.893270199607995,0.978204091156979  
"14072","CTNNA1",582.508334380813,-0.0161935700427144,0.12054475039394

8,-0.134336584461727,0.893136425197333,0.978204091156979  
"14073","AC007938.3",9.82835369966136,0.0858209937471982,0.64020296189  
9151,0.13405279084091,0.893360830055656,0.978204091156979  
"14074","ETFRF1",227.616345558485,-0.032350373320721,0.240968473133652  
, -0.134251476552196,0.893203721895832,0.978204091156979  
"14075","COASY",97.6565762875565,-0.0269643350565079,0.200234559325426  
, -0.134663742100008,0.892877741614998,0.978204091156979  
"14076","FECH",75.9362049277204,-0.0272344702804409,0.202791929339194,  
-0.134297604294143,0.89316724757888,0.978204091156979  
"14077","CERS4",156.722676913561,-0.0296822144437602,0.22095949210636,  
-0.134333285077758,0.893139034078572,0.978204091156979  
"14078","RFXANK",146.078861623304,0.036534475893935,0.270943435181318,  
0.134841709191019,0.89273702779974,0.978204091156979  
"14079","SNTB2",873.599782954746,0.0271014388270833,0.202356591472877,  
0.133929113105841,0.89345862874064,0.978241690605651  
"14080","PYHIN1",31.2936360248665,0.0441774245039634,0.330104417665543  
, 0.133828637666774,0.893538081305927,0.978259199100204  
"14081","USP48",220.136754973226,-0.0254907903525677,0.193406823697047  
, -0.13179881591198,0.895143423147611,0.97843862550557  
"14082","LAMTOR2",460.467842515836,0.0356156637794814,0.26678317407495  
1,0.133500412471573,0.893797638085872,0.97843862550557  
"14083","AL591895.1",34.7797483854748,-0.0439520194406026,0.3367717036  
03656,-0.130509834912762,0.896163073558283,0.97843862550557  
"14084","MBOAT2",73.2946802435176,0.0457648902693776,0.343858180496688  
, 0.133092341160161,0.894120352130549,0.97843862550557  
"14085","LINC01943",14.576498904645,0.0722127649150223,0.5461177110741  
45,0.132229304142121,0.894802923269619,0.97843862550557  
"14086","EEF1B2",3483.00631077235,-0.032723898068228,0.246345029326532  
, -0.132837663328097,0.894321767268589,0.97843862550557  
"14087","MDH1B",2.95742729264013,0.115883897178238,0.870321631673702,0  
.133150657137389,0.894074233173182,0.97843862550557  
"14088","AC097468.3",5.76358728206291,-0.0839846305034851,0.6372733345  
22387,-0.131787454383963,0.895152409947708,0.97843862550557  
"14089","STK11IP",24.6784248341378,-0.0430990734866728,0.3255132710638  
84,-0.132403429653762,0.894665202089682,0.97843862550557  
"14090","PPP1R2",273.071464766024,0.0228034963835532,0.171600428471402  
, 0.132887176254071,0.894282608819899,0.97843862550557  
"14091","ZNF330",179.993303878752,-0.0250518645769649,0.18995130526029  
5,-0.131885719567105,0.895074684090956,0.97843862550557  
"14092","NIPBL-  
DT",79.1498599488283,0.0305202831259817,0.233037301072369,0.1309673729  
72208,0.895801117644672,0.97843862550557  
"14093","AL022068.1",3.05350818359652,0.122510064167546,0.942706270646  
877,0.12995571153195,0.896601466536281,0.97843862550557  
"14094","U91328.1",5.82768087303459,0.075022651767884,0.57776455300361  
6,0.129849869428411,0.896685206780227,0.97843862550557  
"14095","GTF2H4",55.2134439533598,0.0387178075810578,0.291079227087738  
, 0.133014670845568,0.894181777944054,0.97843862550557  
"14096","AL646090.2",2.50275706494005,0.126049989870331,0.960383274636  
429,0.131249672083314,0.895577803140999,0.97843862550557

"14097", "COL12A1", 1869.36139745144, 0.0522041202103014, 0.399164464870583, 0.130783486018043, 0.895946587028815, 0.97843862550557  
"14098", "ZNR2", 60.7433966029014, -0.0399043178436401, 0.300015059516171, -0.133007716039298, 0.894187278205511, 0.97843862550557  
"14099", "C7orf25", 53.0542587642277, -0.0387899739721708, 0.29268139054488, -0.132533106734105, 0.894562638592807, 0.97843862550557  
"14100", "MKRN1", 260.997617265938, -0.0204730094804423, 0.15651639401568, -0.130804249671068, 0.895930161132438, 0.97843862550557  
"14101", "TTI2", 46.2490645498253, -0.0358690461831503, 0.27590872934901, -0.130003303149491, 0.896563813335876, 0.97843862550557  
"14102", "VPS13B-DT", 35.7241485224429, -0.0443726670972707, 0.338038022080905, -0.131265313955276, 0.895565429780667, 0.97843862550557  
"14103", "LRRC24", 10.3246192797677, -0.0643414079456773, 0.48726999144912, -0.132044675590074, 0.894948955088256, 0.97843862550557  
"14104", "XPA", 255.070545280257, -0.0254966781503299, 0.19252419671973, -0.132433629563182, 0.894641316382866, 0.97843862550557  
"14105", "TRIM14", 4.0293806821129, -0.105937189291972, 0.813010831859818, -0.130302309810108, 0.896327252687444, 0.97843862550557  
"14106", "MRRF", 55.81556993074, 0.0340492263208749, 0.262103301026228, 0.12990765926091, 0.896639484429543, 0.97843862550557  
"14107", "C10orf25", 8.96369278160039, -0.0734448499956481, 0.562817280779193, -0.130495015885026, 0.896174797173692, 0.97843862550557  
"14108", "C10orf55", 5.29993314467528, 0.0892594060664489, 0.683321710270713, 0.13062574293313, 0.896071377295669, 0.97843862550557  
"14109", "ZBED5-AS1", 39.5660284270867, -0.0421026819294763, 0.323468005014578, -0.130160267095285, 0.89643962935965, 0.97843862550557  
"14110", "PLAAT5", 26.8261686891714, 0.0439505513355563, 0.333785399985661, 0.131673078982617, 0.895242879942626, 0.97843862550557  
"14111", "AVIL", 21.7929760340816, -0.0673553467824148, 0.517871976630526, -0.130061771676959, 0.896517554937486, 0.97843862550557  
"14112", "AC025165.5", 2.91396268732085, -0.11703525086932, 0.885069954492929, -0.132232769031654, 0.894800182751835, 0.97843862550557  
"14113", "NDUFB1", 772.781634464111, -0.0345062466865912, 0.261116445532338, -0.132148883293212, 0.894866531643483, 0.97843862550557  
"14114", "RASGRP1", 8.39385158583348, 0.087967455984285, 0.664154673703396, 0.132450255139769, 0.894628166925653, 0.97843862550557  
"14115", "TMED3", 398.840517147513, -0.0345581550577398, 0.264826106038947, -0.13049376277374, 0.896175788534965, 0.97843862550557  
"14116", "E4F1", 57.1575515141856, -0.0294498871257906, 0.223885185880554, -0.131540132992553, 0.895348040831589, 0.97843862550557  
"14117", "PDXDC1", 148.7430938165, 0.0330729423878726, 0.252917800187762, 0.130765578236565, 0.895960753712606, 0.97843862550557  
"14118", "AC133552.5", 17.2641835235015, -0.0578947915636771, 0.441396127267656, -0.131162889720078, 0.895646452000269, 0.97843862550557  
"14119", "INCA1", 5.99776320075642, -0.0842404458498411, 0.64813494179088, -0.129973621877373, 0.896587296328138, 0.97843862550557  
"14120", "INTS2", 31.4170452832386, 0.044438782232867, 0.335411716179118, 0.132490250308178, 0.894596534171095, 0.97843862550557

"14121", "AC092329.4", 16.0366587362415, 0.0525520494679522, 0.39950650197  
8522, 0.131542413471853, 0.895346236946478, 0.97843862550557  
"14122", "CEACAM19", 2.80148635096588, 0.116313079623665, 0.88996522810357  
7, 0.130693959663476, 0.896017410848941, 0.97843862550557  
"14123", "ZNF583", 32.8502571546459, 0.0423164317318496, 0.320076221447092  
, 0.132207358423982, 0.894820281032783, 0.97843862550557  
"14124", "FP565260.6", 10.1830442708935, -0.0754412733233824, 0.5658121558  
95571, -0.133332719237842, 0.893930252394049, 0.97843862550557  
"14125", "LIMK2", 26.0143236935564, 0.0436748659826412, 0.335193899938222,  
0.130297317435343, 0.896331202354667, 0.97843862550557  
"14126", "TTLL1", 42.7612935743228, -0.036164474233414, 0.273588040199033,  
-0.132185874086838, 0.894837273919692, 0.97843862550557  
"14127", "AKAP17A", 100.15126616389, -0.0247769488283369, 0.19049409779372  
9, -0.13006675332884, 0.896513613632708, 0.97843862550557  
"14128", "FANCF", 29.2913480677956, 0.04683189568718, 0.36157965647281, 0.1  
29520272639292, 0.896945984811429, 0.978653904011055  
"14129", "AL445524.1", 15.6246979614794, -0.0521923799459399, 0.4034146875  
26141, -0.129376499070966, 0.897059742406337, 0.978708750031402  
"14130", "KDM1A", 154.843311123262, 0.0217431893314945, 0.16902749153867, 0  
.128636999422784, 0.897644888214368, 0.97893487372005  
"14131", "AL390195.2", 2.75896829302004, 0.153397919855167, 1.196615711964  
86, 0.128193135290933, 0.897996132492597, 0.97893487372005  
"14132", "AC244033.2", 13.1666720140576, -0.0539388996939165, 0.4307205461  
554, -0.125229456025197, 0.900341898261914, 0.97893487372005  
"14133", "LINC01139", 13.4804467241851, 0.0810041924572885, 0.644526307334  
61, 0.125680195727425, 0.89998507906641, 0.97893487372005  
"14134", "FAM228A", 2.43291153556521, -0.148376897903337, 1.17076736906205  
, -0.126734739816167, 0.899150349125538, 0.97893487372005  
"14135", "KIF3C", 24.4597877623503, 0.0563436847684144, 0.441267106989419,  
0.127686119984841, 0.898397374821124, 0.97893487372005  
"14136", "COMMD1", 360.029046259766, 0.0367417332122609, 0.290226870702617  
, 0.126596593634876, 0.899259693134756, 0.97893487372005  
"14137", "TMEM182", 9.05454657463562, -0.0664025848042677, 0.5159955210798  
43, -0.128688296877664, 0.897604296143561, 0.97893487372005  
"14138", "ANKRD44", 31.7010763251483, -0.0472150039601422, 0.3759312776077  
21, -0.125594774291195, 0.900052699711507, 0.97893487372005  
"14139", "GLB1L", 49.6310650843565, 0.0465386404261865, 0.361076833638475,  
0.128888469407547, 0.897445900644178, 0.97893487372005  
"14140", "COL7A1", 4.10346622054583, -0.104690677418003, 0.82960427994121,  
-0.126193511713105, 0.899578747211229, 0.97893487372005  
"14141", "STIMATE", 56.4647762091846, 0.037784357481633, 0.296464305738738  
, 0.127449938323877, 0.898584293397729, 0.97893487372005  
"14142", "AC124016.1", 9.3250498510779, -0.0667493780828874, 0.52558425003  
9485, -0.127000339294552, 0.898940130006261, 0.97893487372005  
"14143", "ARHGAP24", 311.99046397871, -0.0314190181031457, 0.2510031574654  
85, -0.125173796299618, 0.900385961584517, 0.97893487372005  
"14144", "PDE4D", 32.9820567447847, -0.0549086548347912, 0.438596726480245  
, -0.125191665873649, 0.900371815006183, 0.97893487372005  
"14145", "PNRC1", 4812.89626358045, 0.0284305032980786, 0.227677354549792,  
0.124871897577591, 0.900624966684631, 0.97893487372005

"14146", "FAXC", 4.83349246279647, -0.14075833174364, 1.11468641889517, -0.126276170013046, 0.899513318820613, 0.97893487372005  
"14147", "SP4", 40.2967832875811, 0.0414491723186961, 0.331466675693476, 0.125047781144148, 0.900485723297594, 0.97893487372005  
"14148", "AC007036.2", 5.03697086981969, -0.0917933509748912, 0.733377893881444, -0.125165145746444, 0.900392809869263, 0.97893487372005  
"14149", "ALKBH4", 82.3994371328373, -0.0319359208375532, 0.252168245773043, -0.126645290883675, 0.899221148583359, 0.97893487372005  
"14150", "INSIG1", 200.761408253993, -0.0343350159676371, 0.272682049915955, -0.12591593754785, 0.899798466749504, 0.97893487372005  
"14151", "SLC39A14", 149.361198679564, 0.0432371649856933, 0.345552545689758, 0.125124718440107, 0.900424814591965, 0.97893487372005  
"14152", "LAPTM4B", 197.403250367151, -0.0379924245454968, 0.299721403877763, -0.126759130492367, 0.899131043873391, 0.97893487372005  
"14153", "KIF27", 40.3965968997495, 0.0446557859103222, 0.349322908223148, 0.127835263188053, 0.898279343008214, 0.97893487372005  
"14154", "ZMYND11", 281.115737584004, 0.0227470423741124, 0.180367666620211, 0.126114856395018, 0.899641007664941, 0.97893487372005  
"14155", "NUDT5", 207.403623272571, 0.0249372905389521, 0.197607333234781, 0.126196179720332, 0.899576635332562, 0.97893487372005  
"14156", "CUBN", 12.7881123258038, -0.0584892193103982, 0.455803683648623, -0.128321076394563, 0.897894886438411, 0.97893487372005  
"14157", "AL121749.1", 3.95989780893134, -0.100736107151126, 0.807264761476091, -0.124786949658163, 0.900692219293455, 0.97893487372005  
"14158", "IFITM3", 5743.16618747783, -0.0279616516051065, 0.222846835905507, -0.125474752609739, 0.900147711556086, 0.97893487372005  
"14159", "IP07", 171.770702286883, -0.0277249460222274, 0.217075357445959, -0.127720374843236, 0.89837026535438, 0.97893487372005  
"14160", "CUL5", 251.057493425848, -0.0232154068686911, 0.180043221427621, -0.128943520809107, 0.89740233946783, 0.97893487372005  
"14161", "SORL1", 6.98207639135427, -0.0886374436277794, 0.695990448333767, -0.127354396658721, 0.898659908454541, 0.97893487372005  
"14162", "HOXC11", 28.9535234086196, -0.0387346510013133, 0.309635104828451, -0.125097737295562, 0.900446174602547, 0.97893487372005  
"14163", "DDIT3", 319.993918382117, 0.0421097206780564, 0.329828037238742, 0.127671743829272, 0.898408752218072, 0.97893487372005  
"14164", "UGGT2", 152.421303249071, 0.0268885224309875, 0.212462248466003, 0.126556706544928, 0.899291264499617, 0.97893487372005  
"14165", "SLC38A6", 61.5433175092534, 0.0284610884702836, 0.227226255166663, 0.125254400946793, 0.900322150579561, 0.97893487372005  
"14166", "SNRPN", 326.198283173036, -0.0284996481345065, 0.226679456291321, -0.12572664766709, 0.899948307452195, 0.97893487372005  
"14167", "LRRK1", 113.004474259081, 0.0290677789619135, 0.226218529251843, 0.128494244295759, 0.897757852854546, 0.97893487372005  
"14168", "FAM234A", 172.857079662558, 0.0272459434382811, 0.217199906741366, 0.125441782397838, 0.900173811763025, 0.97893487372005  
"14169", "TPSAB1", 7.49532766632298, 0.110174014491375, 0.868381821876706, 0.126872778443557, 0.899041092158384, 0.97893487372005  
"14170", "ARHGAP44", 22.0562957764082, -0.0492804252671735, 0.384989921116236, -0.128004455608319, 0.898145446985393, 0.97893487372005



"14171", "TMEM98", 649.279053292858, 0.0274621889066487, 0.217559727397259, 0.126228274116668, 0.899551230857803, 0.97893487372005  
"14172", "HSD17B1", 10.887689770969, 0.0570878581450003, 0.443704219441864, 0.128661968139071, 0.897625130243558, 0.97893487372005  
"14173", "UBTF", 360.064818445126, -0.0249874940695926, 0.200022600139085, -0.124923353922095, 0.900584229442773, 0.97893487372005  
"14174", "P2RY11", 5.5511148834775, -0.0778339799996801, 0.623046984406545, -0.124924735931139, 0.900583135329861, 0.97893487372005  
"14175", "DOCK6", 30.4356986680297, -0.0390245976918993, 0.30725316073257, -0.127011216414681, 0.898931521034169, 0.97893487372005  
"14176", "ZNF256", 10.4057512684557, 0.0669710902718034, 0.529070120714906, 0.126582635551803, 0.899270741195942, 0.97893487372005  
"14177", "SNAI1", 4.87315132530915, 0.0920651983469307, 0.728160174232865, 0.126435366290011, 0.899387308521389, 0.97893487372005  
"14178", "CSTF1", 65.2351915628854, 0.0303002176576681, 0.237114923835725, 0.12778705434273, 0.898317495204212, 0.97893487372005  
"14179", "CBR3", 454.530212812479, -0.0296515524284355, 0.235111110935031, -0.126117189062278, 0.89963916120847, 0.97893487372005  
"14180", "ADARB1", 64.0402897392543, 0.0472763315468411, 0.369314585392205, 0.128011005838382, 0.898140263302271, 0.97893487372005  
"14181", "PRDX4", 999.389405616874, -0.0381695666783705, 0.298526730611591, -0.127859795336158, 0.898259928501082, 0.97893487372005  
"14182", "TMSB15B-AS1", 10.1098379188837, 0.0690199695957531, 0.553125258537177, 0.12478180761133, 0.900696290234931, 0.97893487372005  
"14183", "FGF13", 2.55357892642782, -0.14145677503232, 1.12136402846451, -0.126147059689455, 0.899615516729985, 0.97893487372005  
"14184", "IRAK2", 5.91783510235685, -0.082954867257115, 0.665934956539468, -0.124569023509728, 0.900864752993848, 0.979048940172036  
"14185", "PANK4", 35.2802443196383, 0.0377183164855955, 0.304526347926785, 0.123858959142228, 0.901426948515806, 0.979082824785134  
"14186", "TRAPPC12", 161.137374677533, -0.0236301538021959, 0.191273072940782, -0.123541455359541, 0.901678349071064, 0.979082824785134  
"14187", "AC104695.3", 3.4168622488827, -0.10157214855731, 0.822737440115798, -0.123456334432786, 0.901745749782393, 0.979082824785134  
"14188", "RPN1", 373.67880048364, -0.0182036089542842, 0.147072040334413, -0.123773416843152, 0.901494680221896, 0.979082824785134  
"14189", "SNX14", 165.135356050102, 0.0213756231818802, 0.1723614807692, 0.124016242413832, 0.901302414756376, 0.979082824785134  
"14190", "THAP1", 73.0864212473394, 0.0273533995618515, 0.221525267806032, 0.123477560066882, 0.901728942769884, 0.979082824785134  
"14191", "MFSD3", 25.5168530487479, -0.048329857312041, 0.391877982457388, -0.123328840801349, 0.901846703502512, 0.979082824785134  
"14192", "CFAP300", 31.342113790515, 0.0447070409094289, 0.360829312828485, 0.123900801071225, 0.901393818673456, 0.979082824785134  
"14193", "LINC02731", 4.18933842423773, -0.09591783744283, 0.77358757226883, -0.123990923434196, 0.901322461655823, 0.979082824785134  
"14194", "AC093525.4", 10.473392681399, 0.0748603511721649, 0.602968392423016, 0.124153027111985, 0.901194113333563, 0.979082824785134  
"14195", "DHX38", 142.039010113419, 0.0280855520514973, 0.227139456440457,

0.123648935731515,0.901593244648325,0.979082824785134  
"14196","CEP76",22.76320843464,-0.0525254208785953,0.426122176325633,-  
0.123263758135077,0.90189823874579,0.979082824785134  
"14197","KRI1",50.990482047168,0.0354370561368139,0.287682350610023,0.  
123181196419143,0.901963615244257,0.979082824785134  
"14198","AKAP8L",119.764341809488,0.0216646038804509,0.174193938568886  
,0.124370595546776,0.901021853914606,0.979082824785134  
"14199","ZNF146",128.437264394965,0.022404388774788,0.180588385416042,  
0.124063287476503,0.901265165885279,0.979082824785134  
"14200","FITM2",39.4264046682975,-0.0376138327944033,0.302562208999799  
, -0.124317683027058,0.901063746878777,0.979082824785134  
"14201","APOBEC3G",70.8865182376372,0.0319871824624716,0.2597079926560  
29,0.123165953174329,0.90197568568107,0.979082824785134  
"14202","AC139887.4",5.23579138142646,0.0915930234291147,0.74554374583  
519,0.122853989374572,0.902222720692066,0.979092823798465  
"14203","AL359711.2",4.81348357405471,-0.082856133852133,0.67542236192  
5052,-0.122673068768379,0.902365990769043,0.979092823798465  
"14204","APOLD1",45.9048134256685,-0.0699279952916639,0.56923961177702  
6,-0.122844569922613,0.902230179828015,0.979092823798465  
"14205","ATF7",278.189781508842,0.0195186138192877,0.158623849489486,0.  
.123049679364775,0.902067758402621,0.979092823798465  
"14206","FES",90.927453745922,-0.0290011975452119,0.236306681114325,-0.  
.122726947069182,0.902323324493185,0.979092823798465  
"14207","SREBF2",71.3879692570276,0.0336634520154742,0.274286156983549  
,0.122731137384718,0.902320006190289,0.979092823798465  
"14208","TM9SF2",429.135488679434,-0.016856453765931,0.137936318379573  
, -0.122204608358078,0.902736976870219,0.979288564282507  
"14209","AC091057.2",3.25032110199735,-0.10585928960255,0.866185124616  
524,-0.122213238941752,0.902730141892073,0.979288564282507  
"14210","AC002310.1",3.86343092416454,-0.0932405496123478,0.7623684812  
95696,-0.122303783406522,0.902658435769986,0.979288564282507  
"14211","AC080013.5",2.63465088392314,-0.118114516020761,0.96747815115  
0819,-0.122084944120199,0.902831745531455,0.979322451436731  
"14212","CASC3",168.27970843243,-0.0269102686920233,0.220574732607183,  
-0.122000685998551,0.902898474981586,0.97932592118218  
"14213","RPE",103.63440553334,0.0263017666161584,0.215843759766075,0.1  
21855580372875,0.903013395108885,0.979381656624461  
"14214","CHML",40.7060906482968,0.0360418048141121,0.296180127896008,0.  
.121688801575394,0.903145482371077,0.979456001881958  
"14215","GMEB1",70.0362637268868,0.0272353498947851,0.225595296243019,  
0.120726585830257,0.903907600561845,0.979593339613389  
"14216","PCAT6",12.0455236774431,0.0594072763777126,0.490916970744962,  
0.121012879810536,0.903680833556136,0.979593339613389  
"14217","AHCTF1",152.516592480216,0.0295220357413666,0.244456619291742  
,0.120765949504252,0.903876421018184,0.979593339613389  
"14218","SPDYA",2.6654592782452,-0.120314608816642,0.990945255226257,-  
0.121413981430459,0.903363143225804,0.979593339613389  
"14219","OSGEPL1",35.2412675812832,-0.0343876347281541,0.2840180971070  
47,-0.121075505675236,0.903631230067543,0.979593339613389  
"14220","GIN1",34.4082893166938,-0.0394866086964459,0.326670054882973,

-0.120876119822466,0.903789157079729,0.979593339613389  
"14221","KCTD9",170.032671972724,-0.0235495858369981,0.194175762052496  
, -0.121279739489995,0.903469467095895,0.979593339613389  
"14222","AP002381.2",2.92023718634393,0.113292640019043,0.937411951401  
447,0.120856833380104,0.903804433441868,0.979593339613389  
"14223","KMT5A",105.933000309143,-0.0229410228361625,0.189615952758993  
, -0.120986776177641,0.903701509329876,0.979593339613389  
"14224","TXNDC16",35.1272072616158,0.0400866334294044,0.33120014266135  
3,0.121034469089563,0.903663733493395,0.979593339613389  
"14225","THAP4",117.972883994524,-0.0239298193216553,0.198738066477674  
, -0.120408836343105,0.904159291941434,0.979728348465993  
"14226","SMN2",15.3540788527922,-0.0600094522439047,0.498169200426434,  
-0.120459980650222,0.904118779561197,0.979728348465993  
"14227","LINC01355",9.42466235977596,-0.09717334362117,0.8083650396588  
69,-0.120209730571942,0.904317009792005,0.979777731049977  
"14228","MCPH1",89.9832742305318,-0.0257984845001758,0.214741897275784  
, -0.1201371731714,0.904374485695948,0.979777731049977  
"14229","MLEC",451.430472944793,-0.0221603441635652,0.184622839857064,  
-0.120030350419925,0.904459105601114,0.979777731049977  
"14230","AC110597.1",4.82368872845754,0.0822224682199728,0.68484882363  
0159,0.120059296859325,0.904436175500779,0.979777731049977  
"14231","SDAD1",141.716278207988,-0.0260546939992473,0.217239990274899  
, -0.119935072572399,0.904534581097712,0.979790637876553  
"14232","NFYC",114.268773979714,0.0220842351177216,0.184713478507012,0  
.119559413293618,0.904832172525949,0.979843151812898  
"14233","C3orf67",11.9764735982369,-0.0645844481306553,0.5401696878320  
81,-0.11956325870461,0.904829126183488,0.979843151812898  
"14234","USP31",31.3151454385121,0.0378761728984629,0.316815128582608,  
0.119552917399861,0.904837318589465,0.979843151812898  
"14235","ACOX1",138.041751894556,0.0262439017180011,0.219400513510864,  
0.119616409725046,0.904787019979759,0.979843151812898  
"14236","KLHL23",23.2045747037654,0.0409741575401725,0.344060426557087  
, 0.119090003898993,0.905204050116549,0.980033742979815  
"14237","KPNA2",150.656387607041,0.0554050059713853,0.464754211793111,  
0.119213563998962,0.90510616076744,0.980033742979815  
"14238","ZNF711",15.5574673823509,0.0526602460951418,0.441987400131074  
, 0.119144224653294,0.905161094046805,0.980033742979815  
"14239","KYAT1",8.31371079524491,-0.0729807207199105,0.613902882882346  
, -0.118879912042858,0.905370496757065,0.980076278617286  
"14240","PPP2R1B",64.8327857550902,-0.0322646316306415,0.2712281130094  
24,-0.118957549321299,0.905308987633222,0.980076278617286  
"14241","COPG1",189.265437565573,-0.0235845858455925,0.199578625483605  
, -0.118171902369024,0.905931452598627,0.980078845026611  
"14242","SNX10",27.6582311913821,-0.0630568841377647,0.534335715041699  
, -0.118009862269536,0.906059843528654,0.980078845026611  
"14243","MKLN1-  
AS",32.8953072275193,0.0390282264678557,0.329710218146988,0.1183712979  
45205,0.905773466786607,0.980078845026611  
"14244","AC067817.1",3.80450430936202,-0.0910479761564151,0.7716308562  
87286,-0.117994213702772,0.906072242651588,0.980078845026611

"14245", "ITPR2", 77.5512491818592, -0.0355886189389337, 0.300929542255644, -0.118262297121698, 0.90585983024507, 0.980078845026611  
"14246", "MAP1LC3B2", 4.92106590267316, -0.0921217050007301, 0.778708014661576, -0.118300702273837, 0.90582940097393, 0.980078845026611  
"14247", "XP04", 41.7425057511083, -0.0299367987618443, 0.252553245922227, -0.118536582860089, 0.905642510481354, 0.980078845026611  
"14248", "FAM98B", 86.8522518729482, -0.0350397154524755, 0.295709134672671, -0.118493855427435, 0.905676363456365, 0.980078845026611  
"14249", "AC005332.5", 24.1533523292682, -0.0389454677552337, 0.327842658431966, -0.118793167251344, 0.905439222095761, 0.980078845026611  
"14250", "SLC9A8", 26.6213233701201, 0.0405027322841134, 0.341600292258398, 0.118567616017951, 0.905617922995989, 0.980078845026611  
"14251", "NSDHL", 45.5524433232276, -0.0312762013278209, 0.264746425565066, -0.118136444188306, 0.905959547340507, 0.980078845026611  
"14252", "AC012511.1", 12.0802464717794, 0.0605415088357957, 0.514576913550686, 0.117652982948743, 0.906342622114055, 0.980255621549238  
"14253", "FCHSD2", 47.4853403624892, 0.0368364871467655, 0.313162332694031, 0.117627451647436, 0.906362852672156, 0.980255621549238  
"14254", "AC010210.1", 2.96807591008635, 0.10096309627757, 0.86056175984714, 0.117322313154495, 0.906604643793451, 0.980342378977101  
"14255", "CAVIN4", 3.43948896309069, 0.100729472237379, 0.859536235627539, 0.117190489547933, 0.906709103230079, 0.980342378977101  
"14256", "PUS7L", 168.047619880124, 0.0215195055920148, 0.183311494507849, 0.117393105379397, 0.906548547406424, 0.980342378977101  
"14257", "LRRC45", 38.9761573530051, -0.0376557139432526, 0.32156178631325, -0.117102577314862, 0.906778767388367, 0.980342378977101  
"14258", "INSR", 225.320455259405, 0.0300013230441056, 0.256323687445546, 0.1170446763742, 0.906824650135224, 0.980342378977101  
"14259", "GET1", 170.994901693158, -0.0290009129044566, 0.247282336177514, -0.117278546267203, 0.90663932529629, 0.980342378977101  
"14260", "PCBP1-AS1", 85.0646996335786, -0.0315329524786011, 0.272222831382184, -0.115835076427997, 0.907783250651943, 0.980959201968435  
"14261", "TBCCD1", 33.778849564091, 0.0361040938564081, 0.310761148914715, 0.116179560998844, 0.907510235008416, 0.980959201968435  
"14262", "GSR", 57.2985722199925, 0.0303404558236058, 0.262591434850144, 0.115542442733978, 0.908015181285833, 0.980959201968435  
"14263", "PRPF40B", 31.6390664233503, -0.0343145570210515, 0.296860645444796, -0.115591465381465, 0.907976327202679, 0.980959201968435  
"14264", "MAPK1IP1L", 224.844332387719, 0.0192777935883809, 0.166408027533459, 0.115846536216559, 0.907774168207555, 0.980959201968435  
"14265", "ANKS3", 73.1523281115142, -0.0286251665154653, 0.2474200025667, -0.115694633491682, 0.907894559544778, 0.980959201968435  
"14266", "LGALS3BP", 2317.14633875325, 0.0306915186315866, 0.265010309496159, 0.115812545896564, 0.907801107238084, 0.980959201968435  
"14267", "THOC1", 95.5102857515781, 0.024517493702958, 0.212225590583456, 0.115525623632635, 0.90802851172149, 0.980959201968435  
"14268", "AC020911.2", 10.3247788382639, -0.0722233338436871, 0.625152645157621, -0.115529118213164, 0.90802574199463, 0.980959201968435  
"14269", "APOL4", 52.6650857145267, -0.037087764727585, 0.32104573560273, -

0.11552174850713,0.908031583061148,0.980959201968435  
"14270","TNFRSF14",207.758879009082,0.0203200688119778,0.1763705820875  
5,0.115212347611865,0.908276811872162,0.981155364751884  
"14271","NIPAL3",30.575737203477,0.0354450037441758,0.308613611138705,  
0.114852367053394,0.908562140742541,0.981394814627305  
"14272","ODC1-  
DT",4.24937970542737,0.0789213591397241,0.688929205072129,0.1145565590  
17499,0.908796613827122,0.981510530522321  
"14273","ZNF33A",114.16340769982,0.03425162988562,0.298882918807034,0.  
114598820241493,0.908763114860242,0.981510530522321  
"14274","SHOC2",204.857026762275,-0.0199432645161616,0.174346636656276  
, -0.114388581842733,0.908929764952901,0.981585563034116  
"14275","ATP1A1",627.055197042214,0.0265041615991558,0.232244951816723  
, 0.114121583232826,0.909141413051776,0.981745350766594  
"14276","VPS26A",307.89198944611,0.019325599269296,0.169690319792654,0.  
.113887458594634,0.909327007469894,0.981809098628191  
"14277","SPTY2D1",208.000305525071,0.0203496849616655,0.17868403280677  
2,0.113886420862638,0.909327830107991,0.981809098628191  
"14278","CROCC",166.531232809767,-0.0223264274635128,0.196521220055359  
, -0.113608227433269,0.909548365034264,0.981836711406354  
"14279","ALDH4A1",7.98519541869281,0.0628171405308695,0.56060565275757  
3,0.112052278142179,0.910781955568786,0.981836711406354  
"14280","CDC42-  
AS1",3.89043105696526,0.0891083806963596,0.799408252038376,0.111467927  
018699,0.911245297602014,0.981836711406354  
"14281","DNAJB4",198.210200718975,-0.0258096871736326,0.23350483085301  
5,-0.110531705401329,0.911987706636602,0.981836711406354  
"14282","EFNA1",4.9675195725874,0.0696408351060725,0.626176111027321,0.  
.111216052288897,0.911445022714859,0.981836711406354  
"14283","RUSC1-  
AS1",5.10446433439453,0.0709020768484621,0.626167317648087,0.113231838  
919306,0.909846754176573,0.981836711406354  
"14284","EEF1AKNMT",81.24897524121,-0.0258663003272962,0.2312666126201  
85,-0.111846236835652,0.910945325801793,0.981836711406354  
"14285","AL391832.2",8.13730515711741,0.065857580533152,0.583016558712  
168,0.112960051561187,0.910062226675634,0.981836711406354  
"14286","HAT1",201.418302274311,-0.0210984578731691,0.188728904282611,  
-0.111792403783447,0.91098801067068,0.981836711406354  
"14287","MON1A",27.5097562956393,0.0368866277347529,0.327445272776306,  
0.112649748832844,0.910308242173807,0.981836711406354  
"14288","SRD5A3-  
AS1",3.75588411833702,-0.0850438525774113,0.752152370169779,-0.1130673  
19801458,0.90997718382827,0.981836711406354  
"14289","AC146944.4",14.3469304734464,-0.0499835047030605,0.4437873935  
46284,-0.112629392880326,0.910324381165478,0.981836711406354  
"14290","SERINC5",69.3992561857514,-0.0300887445967351,0.2647026302970  
46,-0.113669987196463,0.909499405026575,0.981836711406354  
"14291","ZMAT2",320.049697139403,0.023378990159733,0.210969104910942,0.  
.110817127321094,0.911761363367549,0.981836711406354  
"14292","DDR1",9.10459631291188,0.0578109056709592,0.514726970135906,0

.112313729462622,0.910574656144454,0.981836711406354  
"14293","ZNF318",58.1146998560185,0.0332446076633768,0.29614479182644,  
0.112257951451195,0.910618880882797,0.981836711406354  
"14294","MRPS18A",180.111733763321,0.0325667850135276,0.28756424348308  
8,0.113250467509681,0.909831985708306,0.981836711406354  
"14295","AL122017.1",5.0026073049321,0.0763309545479986,0.685816148839  
783,0.111299441806861,0.911378898030187,0.981836711406354  
"14296","CCDC28A",113.922176083239,0.0247286163668873,0.22289463112870  
8,0.110943077640161,0.91166148541319,0.981836711406354  
"14297","TYW1B",26.352866805285,-0.047858476015636,0.431231048370432,-  
0.110981053420173,0.911631371088986,0.981836711406354  
"14298","NUDT18",55.5019902550441,-0.0389848694581196,0.34512998521975  
8,-0.112957062926006,0.910064596096705,0.981836711406354  
"14299","TNFRSF10B",68.5393213517866,0.037900328774419,0.3418745585631  
92,0.110860337001104,0.911727098156667,0.981836711406354  
"14300","IMPAD1",265.698824640488,-0.0166993843309185,0.15079454401708  
5,-0.110742629580992,0.911820440348015,0.981836711406354  
"14301","DECR1",501.445396907032,-0.0325224754429783,0.292480230058224  
, -0.111195465883297,0.911461347038159,0.981836711406354  
"14302","SLC31A2",136.867087731827,0.0291983135611692,0.26428543779679  
6,0.110480220948152,0.912028535233707,0.981836711406354  
"14303","NDOR1",5.2759192581997,-0.0689465808723243,0.618148603033679,  
-0.111537226702376,0.911190347113198,0.981836711406354  
"14304","CUTC",574.278318965045,-0.0326163461325033,0.290200152621039,  
-0.112392587798173,0.910512132171353,0.981836711406354  
"14305","AP000851.2",2.49682958224954,0.104872797782351,0.945436704362  
797,0.110925244702693,0.911675626755984,0.981836711406354  
"14306","AASDHPPT",148.251571347602,0.0216912035635869,0.1955524484874  
7,0.110922689699673,0.911677652850365,0.981836711406354  
"14307","CD3G",6.46642899052272,-0.0730119034741433,0.648605964385133,  
-0.112567425344843,0.910373511667925,0.981836711406354  
"14308","MARCH9",68.9038584368042,0.031713356958337,0.284763900894017,  
0.11136719527571,0.911325172583735,0.981836711406354  
"14309","LATS2-  
AS1",5.47553631101202,0.104577867133944,0.936140839853523,0.1117116812  
7897,0.911052016988209,0.981836711406354  
"14310","NGRN",423.816143242837,-0.0212114187167641,0.187914506392328,  
-0.112878026949548,0.910127256931505,0.981836711406354  
"14311","TMEM159",635.977988755414,-0.0164479746182675,0.1472782873679  
23,-0.111679561951844,0.911077485137689,0.981836711406354  
"14312","AC007336.1",4.87627254315099,-0.0982342044743701,0.8691948970  
23849,-0.113017465715373,0.910016708292059,0.981836711406354  
"14313","TNFRSF11A",8.70762076844078,0.0683513833738369,0.611336302443  
149,0.111806518115605,0.910976819223591,0.981836711406354  
"14314","AC008946.1",4.11812779807693,-0.0804323125428415,0.7215734825  
97795,-0.111467943989946,0.911245284144782,0.981836711406354  
"14315","AC005498.3",4.54902909693939,0.0778156501016169,0.70345946370  
7387,0.110618527600029,0.911918854755041,0.981836711406354  
"14316","LINC00237",3.01511651414443,0.108872409830492,0.9597509725976  
61,0.113438186507713,0.909683166629641,0.981836711406354

"14317", "FAM207A", 153.698702379343, -0.0288591648118083, 0.259164040611083, -0.111354818916086, 0.911334986448733, 0.981836711406354  
"14318", "TCEAL8", 648.515246302747, 0.0250101861040924, 0.226331331101378, 0.110502536181744, 0.912010838606981, 0.981836711406354  
"14319", "TAZ", 86.2080645580997, 0.0243503855443383, 0.216425909524118, 0.112511416021679, 0.91041791854065, 0.981836711406354  
"14320", "CLCC1", 121.194040449133, -0.0210037767076235, 0.191460750416164, -0.109702780658538, 0.912645095082596, 0.981943415940297  
"14321", "NPRL2", 65.6473123204583, -0.030987090397361, 0.282514616029388, -0.109683140762309, 0.912660671458382, 0.981943415940297  
"14322", "HOXA3", 33.1254662530751, 0.0430847908126072, 0.392962367110549, 0.10964100997612, 0.912694085442508, 0.981943415940297  
"14323", "KIFC2", 6.87220190181099, -0.0655991291956555, 0.596548957039314, -0.109964368257763, 0.9124376335054, 0.981943415940297  
"14324", "ERC1", 216.800356722608, -0.0284649341048818, 0.25917946758705, -0.109827118520959, 0.912546483666982, 0.981943415940297  
"14325", "ATP6V0C", 1076.00838221635, -0.0268540237550866, 0.244946176956585, -0.109632344904269, 0.912700957741977, 0.981943415940297  
"14326", "N4BP1", 197.018659497266, 0.018561039244757, 0.169179589673581, 0.109712047892829, 0.91263774526296, 0.981943415940297  
"14327", "ABHD15", 39.0072836553856, -0.0320799671971762, 0.291888037722519, -0.109905042520697, 0.912484683420141, 0.981943415940297  
"14328", "ATAD5", 12.6834415486174, 0.0535384471827686, 0.487504387638531, 0.109821467335112, 0.912550965550414, 0.981943415940297  
"14329", "SMC5", 234.771161425506, -0.0260836911214212, 0.238303245406122, -0.109455878693422, 0.912840915144406, 0.982025452365903  
"14330", "LINC02227", 3.98278815851781, 0.0906972025531118, 0.829313097806981, 0.109364247101547, 0.912913590291306, 0.982035100791381  
"14331", "AC018816.1", 3.17229573698035, -0.103207599619527, 0.946113128061518, -0.109085897403187, 0.913134360375488, 0.982104565681348  
"14332", "TIMP4", 51.5668671254496, -0.0491440349094794, 0.45069824271559, -0.109039774846629, 0.913170942635463, 0.982104565681348  
"14333", "AL078587.2", 2.3577787269546, -0.104293660792812, 0.957158837281612, -0.10896170701303, 0.913232862817962, 0.982104565681348  
"14334", "CBY1", 252.723479296112, 0.0261920317111924, 0.240378725176591, 0.108961521831646, 0.913233009696817, 0.982104565681348  
"14335", "TMEM201", 15.9906364956771, -0.0433597808955565, 0.399827217499525, -0.108446296294494, 0.913641678521123, 0.982236685117443  
"14336", "AC079140.6", 2.64376057468115, 0.104339394658167, 0.962983322389018, 0.108350157507729, 0.913717936831805, 0.982236685117443  
"14337", "LRSAM1", 29.8992619105626, -0.0309478656702887, 0.285907564158667, -0.108244305327697, 0.913801900828365, 0.982236685117443  
"14338", "AC079866.2", 21.8327313053694, 0.0720484315209416, 0.663506068151583, 0.108587449277829, 0.913529715910583, 0.982236685117443  
"14339", "AL136419.3", 8.73244956802553, -0.0671923128166913, 0.619864942601956, -0.108398310984718, 0.913679740881112, 0.982236685117443  
"14340", "ZNF841", 23.1429200773588, 0.0403846780274741, 0.372391257403411, 0.108446901544, 0.913641198433279, 0.982236685117443  
"14341", "PDZD11", 190.406299147118, 0.0329486544882135, 0.304273851648627, 0.108286184664538, 0.913768681213296, 0.982236685117443

"14342", "AEBP1", 2840.00287551257, -0.0161467341289471, 0.149635483764117, -0.107907120174788, 0.914069369022134, 0.982437014788539  
"14343", "GINS4", 5.00202525793805, -0.0723921316566928, 0.671238081593435, -0.107848665982781, 0.914115738119495, 0.982437014788539  
"14344", "TAPT1-  
AS1", 4.91684518430657, 0.0751884060093136, 0.701359068909125, 0.107203869376437, 0.914627245804218, 0.982849703316279  
"14345", "ZNHIT2", 21.878867687908, 0.0439366752611996, 0.409801263389379, 0.107214592014209, 0.914618739403345, 0.982849703316279  
"14346", "AC027644.3", 126.18822228498, -0.0299171695567765, 0.27940606321105, -0.107074160141537, 0.914730146515298, 0.982891761364374  
"14347", "PDSS1", 14.7657323324704, -0.0431097957119799, 0.402940328361133, -0.106988039363841, 0.91479846849471, 0.98289666075458  
"14348", "GMPR", 13.8722782797477, -0.0427528026159723, 0.400000887652211, -0.106881769355334, 0.914882776280211, 0.98291873406464  
"14349", "EPDR1", 181.866811314128, 0.0229692934599502, 0.215180972336786, 0.106744073188778, 0.914992016981113, 0.982967589501976  
"14350", "FXR2", 69.0657823131789, -0.0222811223869862, 0.209594602261362, -0.10630580247101, 0.915339727974093, 0.983272606740115  
"14351", "ZNF687", 34.2833516713738, 0.0345480119411482, 0.328225473704163, 0.10525694898467, 0.91617192288484, 0.983329659183558  
"14352", "GJC2", 23.9712629354897, 0.0517263270656905, 0.490451518065614, 0.105466748823011, 0.91600545340117, 0.983329659183558  
"14353", "TMEM232", 5.35396784141801, -0.0689236407500486, 0.652836137608834, -0.105575713076328, 0.915918995192623, 0.983329659183558  
"14354", "ETF1", 225.404821469396, -0.0187656050935104, 0.178107199079396, -0.105361294717488, 0.916089127412249, 0.983329659183558  
"14355", "AC034213.1", 7.09109734285764, 0.0872856384430437, 0.825446799527248, 0.105743505811682, 0.915785861188701, 0.983329659183558  
"14356", "MCM7", 80.5780356212356, 0.03024474138841, 0.285382068394818, 0.105979824025128, 0.915598360117612, 0.983329659183558  
"14357", "ID01", 9.15415070260708, -0.0571244991886568, 0.544503843774264, -0.104911103643814, 0.916446348159249, 0.983329659183558  
"14358", "BNC2-  
AS1", 16.6549950499012, -0.0489438101262541, 0.463039490165748, -0.105701157602636, 0.91581946186425, 0.983329659183558  
"14359", "AL353796.2", 3.42368802328011, -0.0898645669990964, 0.855628352667993, -0.105027570345096, 0.916353931729665, 0.983329659183558  
"14360", "RBM14", 87.250038742797, -0.025282183902984, 0.239613536968996, -0.105512335499873, 0.915969282313185, 0.983329659183558  
"14361", "DDX47", 13.0791104259875, -0.0526670833403488, 0.502013825477016, -0.104911619297146, 0.916445938985388, 0.983329659183558  
"14362", "RBM23", 179.756374787176, -0.0181625271169001, 0.172255720690082, -0.10543932616077, 0.916027212200364, 0.983329659183558  
"14363", "PAPLN", 96.8850422657917, 0.0519259102160991, 0.493539161068478, 0.105211327311257, 0.916208122715217, 0.983329659183558  
"14364", "ACYP1", 109.969556141103, -0.0327640655238306, 0.312419194685547, -0.104872127196947, 0.916477276256256, 0.983329659183558  
"14365", "KIAA0556", 26.6752895947797, 0.0340061474000364, 0.322630755540592, 0.105402683457926, 0.91605628683575, 0.983329659183558



"14366", "KIAA0100", 127.175957687393, -0.0230096642366341, 0.217661591780  
25, -0.105713020144888, 0.915810049658051, 0.983329659183558  
"14367", "INE1", 14.6759451953879, 0.0487665581084763, 0.464362866710915, 0  
.105018212274143, 0.916361357325422, 0.983329659183558  
"14368", "CEP85L", 110.921147710441, 0.0242685469075948, 0.231983561395324  
, 0.104613218116083, 0.91668272572136, 0.983359700721625  
"14369", "SAAL1", 30.7726722926162, 0.0326507324850118, 0.31240152881669, 0  
.104515277529805, 0.916760444960783, 0.983359700721625  
"14370", "METTL22", 27.6851790630638, 0.0350231663288793, 0.33490895103623  
5, 0.104575187436809, 0.916712904284936, 0.983359700721625  
"14371", "CSNK1E", 448.824101267699, -0.0160248312037561, 0.15318053925264  
, -0.104614014821598, 0.916682093511268, 0.983359700721625  
"14372", "AC025449.2", 6.46401248701977, -0.0626455965333994, 0.6024842460  
60161, -0.10397881262964, 0.917186162489618, 0.983699577728836  
"14373", "PML", 185.873890289821, 0.0298172422367655, 0.286827917209053, 0.  
103955160735046, 0.917204932254074, 0.983699577728836  
"14374", "DDAH1", 17.0289323891894, 0.0523707441570693, 0.51769764280923, 0  
.101160870412477, 0.91942275820993, 0.983794312742258  
"14375", "AL121987.1", 4.06562374947732, 0.0777787508954492, 0.77382641432  
0042, 0.100511884133334, 0.919937948443195, 0.983794312742258  
"14376", "SLAMF7", 3.7624819902916, -0.0929169270980463, 0.943684413385657  
, -0.098461864771813, 0.921565552276997, 0.983794312742258  
"14377", "XCL1", 4.84106738388454, 0.102285191058031, 1.03507857709742, 0.0  
988187692424861, 0.921282165733759, 0.983794312742258  
"14378", "AL356512.1", 4.92710393656875, 0.0701030191418726, 0.70025126054  
1305, 0.100111235912209, 0.920256015179844, 0.983794312742258  
"14379", "CAB39", 146.50639782763, -0.0219527747617908, 0.211943805511354,  
-0.103578279670999, 0.917504025245479, 0.983794312742258  
"14380", "PRRT3", 23.378181069412, -0.0396530221680601, 0.393616699895441,  
-0.100740192625449, 0.919756704550911, 0.983794312742258  
"14381", "CMTM7", 45.490787067404, -0.0325511939982246, 0.314280788505776,  
-0.103573604205929, 0.917507735770188, 0.983794312742258  
"14382", "ITGA9-  
AS1", 48.8436856236455, -0.0280568015621724, 0.277227255238763, -0.1012050  
62027571, 0.919387678436168, 0.983794312742258  
"14383", "KLHL18", 40.5493893173686, 0.0301121493372689, 0.290829080094282  
, 0.103538990418383, 0.917535205887775, 0.983794312742258  
"14384", "LRTM1", 5.2210114911935, -0.0914093982266206, 0.885844530675735,  
-0.103188985269111, 0.917812981726219, 0.983794312742258  
"14385", "COL8A1", 105.288402485957, 0.104906161703073, 1.03291420459918, 0  
.101563286898336, 0.919103321522759, 0.983794312742258  
"14386", "P2RY12", 3.54513973287046, 0.0808310783364395, 0.796810551958991  
, 0.10144328302093, 0.919198578783781, 0.983794312742258  
"14387", "CRIPAK", 22.5537965117881, -0.0457055912130441, 0.44831162682085  
8, -0.101950492645393, 0.918795971386477, 0.983794312742258  
"14388", "PRKAA1", 271.868983225059, -0.0178688796552009, 0.17782250511621  
3, -0.100487166365826, 0.919957571022085, 0.983794312742258  
"14389", "SNRNP48", 90.4508729397167, -0.0228411938865553, 0.2279198809325  
44, -0.100215890746781, 0.920172930533586, 0.983794312742258  
"14390", "ZKSCAN4", 26.8406462294654, 0.0345061430815882, 0.33591777767452

2,0.102721991436315,0.918183619329128,0.983794312742258  
"14391","RGL2",131.456738748437,-0.0238149651132317,0.234008645723762,  
-0.101769595048827,0.918939559950837,0.983794312742258  
"14392","MAPK13",20.005880992221,-0.0465223228224033,0.470794989734334  
, -0.0988165206444858,0.921283951117003,0.983794312742258  
"14393","AGPAT4",96.6166864292014,-0.0231987026469545,0.23550254619759  
, -0.0985072264462502,0.92152953399591,0.983794312742258  
"14394","AC004982.2",9.3411300468866,-0.0495804804767378,0.49829537601  
3722,-0.0995001817463633,0.920741143604299,0.983794312742258  
"14395","HOXA11-  
AS",21.4634990758811,0.0404156207452389,0.408127448194194,0.0990269606  
321808,0.921116863820643,0.983794312742258  
"14396","AC016831.5",99.3046926046016,-0.046431653545674,0.45445535031  
0746,-0.102169890868102,0.918621826270565,0.983794312742258  
"14397","EZH2",17.6291944622956,-0.0517959361658549,0.521821694143494,  
-0.0992598367357486,0.920931966526123,0.983794312742258  
"14398","CCDC107",554.147264528008,-0.0283468700990692,0.2742480626462  
9,-0.103362152591136,0.917675549069066,0.983794312742258  
"14399","GNE",69.8716794493317,-0.0290646306467282,0.280910012486644,-  
0.103465983250099,0.917593145998115,0.983794312742258  
"14400","ABHD17B",42.8267920221018,-0.0279185541883904,0.2723632499138  
9,-0.102504850405541,0.918355963064183,0.983794312742258  
"14401","SLC31A1",66.4682037929539,-0.0241275611297535,0.2449963213866  
77,-0.0984813200181607,0.921550104314941,0.983794312742258  
"14402","AL356481.1",14.047546942257,0.0447307812979255,0.436605164823  
413,0.102451333382685,0.918398439843394,0.983794312742258  
"14403","NDST2",63.4529776578815,-0.0242348850231777,0.236583315304772  
, -0.102436999802618,0.918409816530656,0.983794312742258  
"14404","AL157394.3",12.3952030138137,-0.0471716424519215,0.4611930363  
58989,-0.102281775163672,0.918533020747174,0.983794312742258  
"14405","MARVELD1",338.936487524518,0.0181567762552686,0.1802283213397  
89,0.100743191304752,0.919754324061354,0.983794312742258  
"14406","PNPLA2",153.77431101726,0.0184514901916558,0.180485746909183,  
0.102232395120598,0.918572214867653,0.983794312742258  
"14407","NRIP3",8.83327158297272,-0.0627078922865305,0.62564547296114,  
-0.10022911536423,0.92016243167628,0.983794312742258  
"14408","TMEM134",150.600207980011,-0.0194677086514547,0.1950105390470  
3,-0.0998290079427955,0.92048007807132,0.983794312742258  
"14409","RDX",579.862787430982,-0.0124024390170532,0.125336295436545,-  
0.0989532918126837,0.921175355748593,0.983794312742258  
"14410","ACAD8",51.0897712663631,-0.0278948065541816,0.272923207049949  
, -0.102207528834572,0.918591951908141,0.983794312742258  
"14411","FKBP4",106.935179443114,-0.0274946789015785,0.278638448238207  
, -0.0986751077441883,0.921396233532069,0.983794312742258  
"14412","REP15",4.08831809895479,0.0859337959161995,0.846451219458116,  
0.101522443279381,0.919135742438851,0.983794312742258  
"14413","ASB8",219.846848819242,-0.0175518586887936,0.175597442588639,  
-0.0999550929105,0.920379977493135,0.983794312742258  
"14414","MCF2L",76.9478726417738,-0.0308936531504526,0.305937547618597  
, -0.100980260157432,0.919566130179523,0.983794312742258

"14415", "MIS18BP1", 148.878090400538, 0.0231818926532748, 0.2282513278886  
08, 0.101563013313938, 0.919103538688592, 0.983794312742258  
"14416", "FRMD6-  
AS1", 27.0878104213165, 0.0435545905668275, 0.441374287818949, 0.098679492  
1427176, 0.921392752278348, 0.983794312742258  
"14417", "AL442663.3", 3.71277266346338, -0.0930421232161911, 0.9354390455  
60604, -0.099463587347299, 0.920770197585554, 0.983794312742258  
"14418", "LINC02256", 39.7950992924072, -0.0425796174542809, 0.42021385360  
7881, -0.101328447619468, 0.919289734472657, 0.983794312742258  
"14419", "ARPP19", 273.736066451809, 0.0144341527741359, 0.139973495982721  
, 0.103120613461835, 0.917867245060541, 0.983794312742258  
"14420", "SOX8", 3.51790197558036, -0.0876993055919864, 0.872230866616073,  
-0.100545978075996, 0.919910882523835, 0.983794312742258  
"14421", "UBE2I", 812.223353999717, -0.0209159979636583, 0.205486700740658  
, -0.101787599334986, 0.918925268820975, 0.983794312742258  
"14422", "TXNDC11", 77.8148954663144, 0.0288553050801991, 0.28180807710878  
5, 0.102393463580748, 0.918444371711315, 0.983794312742258  
"14423", "ZNF821", 30.3197751567694, -0.0297644372312557, 0.29575705278133  
3, -0.100638131707588, 0.919837725630462, 0.983794312742258  
"14424", "PIEZ01", 94.617842985829, -0.0231407069649643, 0.232395154202223  
, -0.0995748256645144, 0.920681880682898, 0.983794312742258  
"14425", "DPH1", 3.65985460339046, -0.078950123249606, 0.788465798702216, -  
0.100131322600872, 0.920240068448893, 0.983794312742258  
"14426", "SRR", 34.8072504561439, -0.0406226990568386, 0.396848070372024, -  
0.102363352853794, 0.918468271018337, 0.983794312742258  
"14427", "ZNF286A", 63.5342970844652, 0.0258501063439348, 0.25503609745256  
, 0.101358617866803, 0.919265785399053, 0.983794312742258  
"14428", "SLFN11", 160.2902301436, -0.0212153391065565, 0.214476235309888,  
-0.0989169689401874, 0.921204195716697, 0.983794312742258  
"14429", "VEZF1", 257.957987334006, 0.0186665362623207, 0.187966212419075,  
0.0993079342403476, 0.920893778947392, 0.983794312742258  
"14430", "AP000897.1", 3.21434821053304, -0.086556753225082, 0.85937909413  
6129, -0.100720105731791, 0.919772650469544, 0.983794312742258  
"14431", "AC010336.8", 5.1376892334965, -0.0723040140297, 0.72872046313697  
3, -0.0992205072963752, 0.920963192731972, 0.983794312742258  
"14432", "MY01F", 15.9495163940972, 0.0497898833819276, 0.484402922573092,  
0.102786092035633, 0.918132743743019, 0.983794312742258  
"14433", "ZNF439", 10.4897371252536, 0.0512086404428144, 0.520110581768682  
, 0.0984572170569476, 0.921569242685579, 0.983794312742258  
"14434", "LINC01534", 21.8222337336882, -0.0379914391555388, 0.38215483712  
5787, -0.0994137335569922, 0.92080977897924, 0.983794312742258  
"14435", "NELFCD", 159.891929119366, 0.0195916435301903, 0.198052207367856  
, 0.0989216115819473, 0.921200509503551, 0.983794312742258  
"14436", "TOM1", 128.302704968665, -0.0221952923981632, 0.223912470033673,  
-0.0991248606869698, 0.921039133318905, 0.983794312742258  
"14437", "SERHL2", 12.4050732416961, 0.0518126879358456, 0.503053461706554  
, 0.10299638483766, 0.917965840176937, 0.983794312742258  
"14438", "SLC25A43", 115.168371683805, -0.0194930098028642, 0.191370391111  
399, -0.101860113728446, 0.918867709869198, 0.983794312742258  
"14439", "PDZD4", 2.61518908498256, 0.105923923190219, 1.06339376474567, 0.

0996093137856165,0.920654499273171,0.983794312742258  
"14440","IKBKG",83.2907243923921,-0.0223751237305059,0.218895175086061  
,-0.102218441871589,0.918583289930761,0.983794312742258  
"14441","NDUFV2-  
AS1",16.8323841370477,0.0415589957682964,0.423230688370137,0.098194665  
250623,0.9217777185068,0.983948724519238  
"14442","ATR",83.8571855780122,0.0242789878272732,0.248033847366642,0.  
0978857848839643,0.922022987794293,0.983950709756343  
"14443","TLE4",146.374011114675,-0.0321617102367485,0.328387234975838,  
-0.0979383691303191,0.921981232266876,0.983950709756343  
"14444","MARCH5",170.252409963521,-0.0195351027325267,0.19960096721616  
5,-0.0978707819154528,0.922034901228049,0.983950709756343  
"14445","RTN4RL2",26.5880612000475,-0.0396165006588358,0.4045490009179  
8,-0.0979275701310354,0.921989807401436,0.983950709756343  
"14446","AP001267.1",2.57134003644302,0.0957297870807734,0.98109467864  
6911,0.0975744636723546,0.922270202761002,0.984133682373034  
"14447","LGALS8-  
AS1",2.53965334349054,0.0854738402654904,0.877536153755783,0.097402072  
7233509,0.922407098762142,0.984143509649669  
"14448","AP001437.1",3.68612116877879,0.0721045021032831,0.73974193283  
9897,0.0974725088605849,0.922351165005201,0.984143509649669  
"14449","DSCC1",36.2805134735033,0.0313880186511735,0.323148453270911,  
0.0971318857740575,0.922621659387879,0.984304303374916  
"14450","TARDBP",198.733856824835,-0.0207991940318863,0.21451581260929  
6,-0.0969587918899408,0.922759119513185,0.984314706753564  
"14451","HLX-  
AS1",5.23614518348607,0.101697648484269,1.04850644495178,0.09699286921  
30706,0.922732057293608,0.984314706753564  
"14452","CPT2",65.7100090903046,0.0233219325812123,0.241737901888962,0.  
.0964761106925005,0.923142446315102,0.984314920795967  
"14453","AC011365.1",11.5364843389913,-0.056550285593487,0.58480634346  
5291,-0.0966991658441942,0.922965302287445,0.984314920795967  
"14454","KCNMB1",5.73392048413154,-0.0805805109320921,0.83456552251256  
2,-0.0965538459934153,0.923080710727197,0.984314920795967  
"14455","BTN2A2",22.0370657538393,0.0338521573621317,0.349869951252754  
,0.0967564011739784,0.922919848239677,0.984314920795967  
"14456","SERF2",8130.22644689851,0.0264208975711178,0.273733087800619,  
0.0965206573432665,0.923107068333071,0.984314920795967  
"14457","SCAF1",129.128728758699,-0.0181685106994385,0.187802316354705  
, -0.0967427401966829,0.922930697227675,0.984314920795967  
"14458","AC146507.3",4.40009209867468,0.080515683105098,0.835340075942  
897,0.0963867117403834,0.923213445478888,0.98432253852933  
"14459","ZMYM1",83.7845590584948,0.0197045213570639,0.204907265785165,  
0.0961631169180848,0.923391023452543,0.984345050226315  
"14460","AC124045.1",2.4688719179619,0.0957500733378017,1.008192743734  
56,0.0949719921442039,0.924337073373163,0.984345050226315  
"14461","TIPARP",461.464970056173,0.0366748344611694,0.387060665206633  
,0.0947521609864191,0.92451168583695,0.984345050226315  
"14462","GFM1",107.4655212871,-0.020317442276895,0.211884627968113,-0.  
0958891754995676,0.923608591663808,0.984345050226315

"14463", "GSTCD", 26.5054605450315, 0.0342563726377801, 0.360364551046351, 0.0950603285986748, 0.924266908522559, 0.984345050226315  
"14464", "TBC1D22B", 18.4442020962168, 0.0386735072601596, 0.4034684129056 58, 0.0958526269296886, 0.923637619495698, 0.984345050226315  
"14465", "AC102953.2", 3.69651060837459, 0.100337118080511, 1.056555176392 28, 0.0949662831837359, 0.924341607969329, 0.984345050226315  
"14466", "C8orf76", 89.2621444228735, 0.0233499566817777, 0.24414095121239 1, 0.0956412947759196, 0.923805467022623, 0.984345050226315  
"14467", "COMMD3", 361.260043876537, 0.0240691896215252, 0.253514332598969 , 0.0949421256572498, 0.924360796188083, 0.984345050226315  
"14468", "PSTK", 21.7440492254898, 0.0370097021808683, 0.386750337236319, 0 .0956940398432129, 0.923763574692722, 0.984345050226315  
"14469", "AMOTL1", 103.080177161014, -0.0240306150314324, 0.25203630012929 , -0.0953458490666032, 0.924040126217685, 0.984345050226315  
"14470", "LINC01852", 17.0900030365825, -0.0411947538180288, 0.43446082326 8763, -0.0948181092787399, 0.92445930255354, 0.984345050226315  
"14471", "LYSMD2", 148.163500208474, -0.0242590275732883, 0.25290371724885 4, -0.0959219889576305, 0.923582530442262, 0.984345050226315  
"14472", "FKBP10", 556.304439287731, -0.0223934614554563, 0.23481340267092 7, -0.0953670497541361, 0.924023287247853, 0.984345050226315  
"14473", "TXNL1", 526.105405117527, -0.0246200587797064, 0.259320840266628 , -0.0949405329490396, 0.924362061270869, 0.984345050226315  
"14474", "CDC34", 121.963527090546, 0.0210027669026928, 0.22135862929555, 0 .0948811752653683, 0.924409209016182, 0.984345050226315  
"14475", "TIMM13", 583.304246720196, -0.0249054508997382, 0.26023795722310 7, -0.0957026068199046, 0.923756770462875, 0.984345050226315  
"14476", "FEM1A", 37.5449184980832, 0.0317398745911041, 0.334179774043087, 0.0949784429114247, 0.924331949566898, 0.984345050226315  
"14477", "ZNF784", 10.8373742265303, -0.0426357979698572, 0.44601469913640 5, -0.0955928090540754, 0.92384397658934, 0.984345050226315  
"14478", "PSMD10", 108.305898309034, 0.0166139249691243, 0.173195652017573 , 0.0959257624287166, 0.923579533467873, 0.984345050226315  
"14479", "CDC42- IT1", 6.78768877060668, 0.0600325913647713, 0.635792303559813, 0.094421701 9121617, 0.924774177184792, 0.984368372270297  
"14480", "SKIV2L", 37.889059653309, 0.0306579793854203, 0.324220671647834, 0.0945589904234138, 0.924665124723048, 0.984368372270297  
"14481", "AFMID", 67.8193934235153, 0.0282171701578522, 0.298578435430139, 0.0945050506316772, 0.924707970579971, 0.984368372270297  
"14482", "LIN7B", 16.3594286381192, -0.0450081656209978, 0.476766192523084 , -0.0944030141541937, 0.924789021551634, 0.984368372270297  
"14483", "TANG06", 25.7845979259973, -0.027738590389347, 0.29424528652543, -0.0942702964485709, 0.924894444812464, 0.984412612496315  
"14484", "DDX55", 80.1845775544711, 0.0198023089452174, 0.210654088105311, 0.0940039147748116, 0.925106046968937, 0.984440325441303  
"14485", "EIF3C", 27.8244548571304, 0.041785090314244, 0.444539579229219, 0 .0939963329850057, 0.925112069694629, 0.984440325441303  
"14486", "DHX8", 102.837143220454, 0.0232814841479316, 0.24740593516629, 0. 0941023671573737, 0.925027840008181, 0.984440325441303  
"14487", "TM2D1", 398.966543567288, -0.0188877351899538, 0.201248849044313

, -0.093852637069218, 0.925226217838562, 0.984493832262127  
"14488", "TAMM41", 55.658487526615, -0.027532753498762, 0.293773936259501,  
-0.093720885689605, 0.925330878919307, 0.984537237613275  
"14489", "PTN", 21.5875478111594, 0.102145277543824, 1.09267466670964, 0.09  
34818758555213, 0.925520747610382, 0.984603335018222  
"14490", "RPP30", 160.69252018457, 0.0230679516474347, 0.246669895645841, 0  
.0935174987082928, 0.925492448654333, 0.984603335018222  
"14491", "HOXD9", 9.68213373508125, -0.0525254967068005, 0.564502316844402  
, -0.0930474422149776, 0.925865871239554, 0.98475591011175  
"14492", "YIPF5", 361.171928006976, 0.015529047734409, 0.167381355018803, 0  
.0927764489220705, 0.926081161335183, 0.98475591011175  
"14493", "EMC4", 448.508986118256, -0.0193869024630859, 0.208443314352743,  
-0.0930080320555539, 0.92589718022727, 0.98475591011175  
"14494", "AP001094.2", 3.6599824859586, -0.0730126661522731, 0.78704266206  
9812, -0.0927683716156632, 0.926087578418733, 0.98475591011175  
"14495", "RASAL3", 6.22439957992978, 0.0615667575321559, 0.661336960775269  
, 0.0930943848352022, 0.925828578317202, 0.98475591011175  
"14496", "ITPKC", 102.887546617031, -0.0332219451137793, 0.358232687998794  
, -0.0927384524828484, 0.926111347965621, 0.98475591011175  
"14497", "MRPS26", 315.839389570869, 0.0255828701766804, 0.275361374066076  
, 0.0929065315113568, 0.925977816798087, 0.98475591011175  
"14498", "TMEM102", 2.72603864276114, -0.0960234908099483, 1.0365161133895  
7, -0.0926406155867051, 0.926189075902378, 0.984770630779084  
"14499", "AL627309.5", 4.28313036781956, -0.0716215464361012, 0.7860895930  
24486, -0.0911111749495841, 0.927404253251567, 0.984778763196905  
"14500", "PABPC4", 371.285906626874, 0.0187481890414824, 0.20351338750721,  
0.0921226326735786, 0.926600606638209, 0.984778763196905  
"14501", "SF3B4", 141.160136658813, -0.0229002529863791, 0.248660514416405  
, -0.0920944486909189, 0.926622999012814, 0.984778763196905  
"14502", "OBSCN", 11.0995028595495, -0.0452338887770073, 0.49416627241944,  
-0.0915357670112572, 0.927066887551695, 0.984778763196905  
"14503", "RABL2A", 45.5670886143521, 0.0232044856795778, 0.251077523019018  
, 0.0924196057080754, 0.926364662988113, 0.984778763196905  
"14504", "EXOSC7", 205.731025368151, 0.0228516342730462, 0.247716864099626  
, 0.0922490051539478, 0.92650020351911, 0.984778763196905  
"14505", "COMMD8", 176.319982763444, -0.021106402467907, 0.231192482995588  
, -0.0912936363433141, 0.927259274336861, 0.984778763196905  
"14506", "PKD2", 349.02511503464, 0.0246643823042864, 0.269878711062249, 0.  
0913906184270955, 0.927182215964828, 0.984778763196905  
"14507", "AC010226.1", 121.448796502889, -0.029122354557947, 0.31979201283  
7878, -0.0910665475960805, 0.927439713313075, 0.984778763196905  
"14508", "VARS", 70.0976948420568, 0.0233301497733559, 0.252538346558663, 0  
.0923826028453719, 0.926394061232131, 0.984778763196905  
"14509", "GALNT12", 157.427557909831, -0.0252712178784133, 0.2767504738327  
35, -0.0913140907346267, 0.927243021978257, 0.984778763196905  
"14510", "TAF1D", 508.193020403672, 0.0132975724458176, 0.145424458406214,  
0.0914397247309901, 0.92714319817483, 0.984778763196905  
"14511", "RNF10", 257.395680271484, -0.0132678319409647, 0.145634741689316  
, -0.091103481127251, 0.927410366608797, 0.984778763196905  
"14512", "LYSMD4", 32.2362757469748, 0.0326203110317013, 0.358135852094631

,0.0910836232700936,0.927426145284432,0.984778763196905  
"14513","AC022167.2",5.50232560413867,0.059740217559716,0.656320912934  
532,0.0910228767396829,0.927474413499362,0.984778763196905  
"14514","ZKSCAN2",13.5895019662945,0.0420889224594945,0.46181550171019  
5,0.0911379594310518,0.927382970872126,0.984778763196905  
"14515","ADORA2A",4.89054326030516,-0.0754455526801028,0.8176554506578  
84,-0.0922705922395545,0.926483052665262,0.984778763196905  
"14516","WBP2NL",2.60441431217222,0.0941921912621214,1.03133731063733,  
0.0913301499815938,0.927230261872051,0.984778763196905  
"14517","TIMM17B",110.083510496214,-0.0238127957794054,0.2590898747845  
2,-0.0919094032493939,0.926770020374458,0.984778763196905  
"14518","KDM5C-  
IT1",2.3901093542937,-0.104745674511678,1.14252247396626,-0.0916793121  
347136,0.926952834681925,0.984778763196905  
"14519","HIST2H2AC",94.7805283707116,0.0252564634737439,0.279395960442  
792,0.0903966665578021,0.927972005551231,0.984884907280469  
"14520","SLC22A18",41.0106427802125,-0.03004080225107,0.33085429383051  
, -0.0907976798586126,0.927653353642221,0.984884907280469  
"14521","AP002807.1",7.15239275711884,-0.0653840050651846,0.7220395975  
25906,-0.0905545974060497,0.927846509663087,0.984884907280469  
"14522","AC026461.3",6.49022821725137,-0.0766528245789541,0.8479218670  
17838,-0.090400811160283,0.927968712121273,0.984884907280469  
"14523","METTL2A",75.80666730463,-0.0226883367381821,0.251064042900265  
, -0.0903687221638306,0.927994211067478,0.984884907280469  
"14524","AC020915.2",59.9108126071341,0.0211927707147068,0.23460399129  
2563,0.0903342291746366,0.92802162038591,0.984884907280469  
"14525","MMP240S",365.562044685264,0.0230693002219531,0.25510499887970  
4,0.0904306082721318,0.927945034446345,0.984884907280469  
"14526","SLC35E2A",64.7017064080853,-0.0396904000737786,0.439969813253  
837,-0.0902116437949338,0.928119031645897,0.984920478646668  
"14527","DPP8",140.895104033133,-0.0163787667265639,0.181780641088174,  
-0.0901018206807801,0.92820630241264,0.984945284758783  
"14528","SLC25A19",29.0805992752997,0.0283800665324984,0.3156519432244  
74,0.0899093673955813,0.928359237198196,0.985039760559622  
"14529","AC009961.1",5.22701454137676,-0.0637810184489052,0.7124003765  
99295,-0.0895297371309227,0.928660921657283,0.985076256632453  
"14530","HIBCH",162.869818527225,-0.0169369140836104,0.188988538696835  
, -0.0896187366725965,0.928590194607793,0.985076256632453  
"14531","AP003071.4",7.30023667537183,-0.0543402151646649,0.6073974670  
63242,-0.0894640134530015,0.92871315197142,0.985076256632453  
"14532","AC092375.2",3.18296978472643,-0.0772081553785399,0.8599594392  
2336,-0.0897811592698693,0.928461120441746,0.985076256632453  
"14533","MAP1LC3A",371.596405841247,0.0179604639741759,0.2005625146672  
61,0.0895504526554868,0.92864445918586,0.985076256632453  
"14534","ZFX",231.285920163392,0.018495046150122,0.206993493318161,0.0  
893508576218579,0.928803077125899,0.985103855366433  
"14535","DTX1",119.65585295268,0.0290928445850261,0.326241164916824,0.  
0891758849391168,0.928942130039556,0.985172253560315  
"14536","NUSAP1",7.16126931064188,-0.0502643273002096,0.56407769346674  
3,-0.0891088725584806,0.92899538616625,0.985172253560315

"14537", "MGLL", 514.955325724334, -0.0241778771027465, 0.272491641333813, -0.0887288761754263, 0.929297383169005, 0.985424720475353  
"14538", "AK5", 3.42542845013685, 0.0812107970861368, 0.918773281416668, 0.0883904644690112, 0.929566339883925, 0.985642119226214  
"14539", "BNC1", 3.20979802121818, 0.0766129710580639, 0.869973508901452, 0.0880635677686393, 0.929826152550913, 0.985849793078776  
"14540", "PSEN2", 26.6642727499943, -0.0270687313524028, 0.30870475282624, -0.0876848545562854, 0.930127157565973, 0.985857281215045  
"14541", "HIST1H4E", 3.4774492399685, -0.093369267745599, 1.06364054072498, -0.0877827275011149, 0.930049366219737, 0.985857281215045  
"14542", "HCG25", 11.5446315744348, 0.0471233570896053, 0.538131715118736, 0.087568444240845, 0.930219683649047, 0.985857281215045  
"14543", "ADRA2A", 20.8117220251501, 0.101829329939113, 1.16284153565363, 0.0875693951556998, 0.930218927832249, 0.985857281215045  
"14544", "CHURC1", 785.38203272225, -0.0149762669333381, 0.171174098872, -0.0874914314258314, 0.930280896046322, 0.985857281215045  
"14545", "THAP10", 12.1348320494015, -0.0463844468116546, 0.528757641949566, -0.0877234542476435, 0.930096477690473, 0.985857281215045  
"14546", "C16orf72", 141.274160120367, 0.0214309453754881, 0.244303337927734, 0.0877226875296625, 0.930097087093614, 0.985857281215045  
"14547", "SPN", 5.55609567137578, 0.062052627674129, 0.711421583249462, 0.0872234257930435, 0.930493919225532, 0.985947468027329  
"14548", "ZNF30", 9.87904514594733, 0.0397918565704692, 0.456154938544955, 0.0872332034755503, 0.930486147387034, 0.985947468027329  
"14549", "AC009159.3", 2.79959060847046, 0.0771317841106291, 0.886008227919252, 0.0870553812934328, 0.930627491248644, 0.986021223286676  
"14550", "HYOU1", 55.8004965882882, -0.0304662188319584, 0.351274358692527, -0.0867305514281096, 0.930885691384128, 0.986226215443062  
"14551", "CATSPER2", 8.41791125588208, -0.0674889200248869, 0.778859075226254, -0.0866510029497721, 0.930948923834706, 0.986226215443062  
"14552", "TCHH", 12.1863246038414, -0.0508234044129435, 0.588955412440565, -0.0862941461091885, 0.931232591847005, 0.986261300987434  
"14553", "MRPS31", 173.592091983202, 0.0171275003613605, 0.19844604896485, 0.0863080945713067, 0.931221503952085, 0.986261300987434  
"14554", "TUBGCP3", 73.4368160562606, 0.0224963824620117, 0.260577123551965, 0.0863329142457334, 0.931201774359015, 0.986261300987434  
"14555", "ZNF587B", 9.85756784447936, -0.0507221509557541, 0.587828107094848, -0.0862873863014684, 0.93123796535012, 0.986261300987434  
"14556", "TMEM41A", 106.99201157588, -0.0161000754727451, 0.187056951916024, -0.0860704470367553, 0.931410416269529, 0.986274875242851  
"14557", "PFDN1", 346.118551474034, 0.0247723769738299, 0.287796810372735, 0.0860759260734902, 0.931406060794601, 0.986274875242851  
"14558", "PCYT2", 34.4811884959463, -0.0240106681021286, 0.279097099639692, -0.0860298015748849, 0.931442726810602, 0.986274875242851  
"14559", "ARL8A", 208.425909841443, 0.0176717838084498, 0.205843206790387, 0.085850702017314, 0.931585100842397, 0.986302070367082  
"14560", "IQCB1", 66.4058498704509, 0.019498387535116, 0.228361281942107, 0.0853839467412834, 0.931956155197411, 0.986302070367082  
"14561", "HIST1H1A", 3.12490162591164, 0.0782545049564314, 0.91553393849369, 0.0854741715912596, 0.931884428396314, 0.986302070367082



"14562","PDCD11",77.8657254526738,0.02482516631367,0.289768732690241,0.0856723431931068,0.931726888208588,0.986302070367082  
"14563","ARL14EP",168.884726344167,0.0183052056278261,0.213336109462311,0.0858045347970497,0.931621801529807,0.986302070367082  
"14564","NAA25",67.866478967453,0.0223218331270096,0.261479439413551,0.0853674505998379,0.931969269332254,0.986302070367082  
"14565","HAGHL",26.4445667479358,0.037627114427681,0.440838021096844,0.0853536052404496,0.931980276157439,0.986302070367082  
"14566","TBC1D3L",2.4075194453178,-0.100314532796777,1.17029508882919,-0.085717297931358,0.93169115097821,0.986302070367082  
"14567","RAI14",27.5281560894795,-0.0351629915475908,0.413995884628669,-0.0849356064955334,0.932312584163553,0.9864031068289  
"14568","CTSB",854.479983656469,0.0134866685364177,0.159133650701547,0.0847505758647602,0.93245968684468,0.9864031068289  
"14569","UCK1",102.48653987034,-0.018326871443888,0.216115046677526,-0.0848014598041121,0.932419232967056,0.9864031068289  
"14570","ZNF675",45.3471030494386,0.0242576096746642,0.286001375090985,0.0848164092460994,0.932407347857206,0.9864031068289  
"14571","PHKA2",21.8357627268144,-0.0279642563243684,0.329266176639871,-0.0849290279667985,0.932317814172673,0.9864031068289  
"14572","RTL3",2.85515418983344,-0.080114871713468,0.944037061797625,-0.0848641170516274,0.932369419284149,0.9864031068289  
"14573","COMMD10",137.002509937371,0.0205703363544928,0.244207805233628,0.0842329193156363,0.932871245355178,0.986635351433967  
"14574","C11orf74",168.902085514025,-0.0233278246263252,0.276764034110686,-0.0842877749678838,0.932827631975581,0.986635351433967  
"14575","AC025034.1",2.73872885127154,-0.0765350071611941,0.908608367688894,-0.0842332184941968,0.932871007490572,0.986635351433967  
"14576","PCDHB11",34.5442019217481,0.0371897351574536,0.442402956837638,0.0840630348026861,0.933006314533034,0.986642816665069  
"14577","FAM98C",105.260164061219,-0.0182821106749278,0.217312625117025,-0.0841281571426541,0.932954537831706,0.986642816665069  
"14578","CASP8AP2",160.754993315477,0.0154044914057227,0.183762584143238,0.0838282258466465,0.933193006017952,0.986704862320237  
"14579","GCH1",22.6834881604342,0.049194346693433,0.586781473087852,0.0838375936352505,0.933185557822892,0.986704862320237  
"14580","ISCA2",139.704161123645,0.0230683427794525,0.275527521936365,0.0837242777684483,0.933275654044198,0.986724568387607  
"14581","HADH",131.609709197513,0.0177140185450514,0.212688602580226,0.0832861673364456,0.93362399894554,0.986839883463998  
"14582","AL662884.3",8.28853927655918,0.0510879022459103,0.614746482724957,0.0831040171542835,0.933768831670832,0.986839883463998  
"14583","AC090739.1",2.5561526260542,0.0869315287156208,1.04260857931508,0.0833788733761704,0.933550286613229,0.986839883463998  
"14584","POLR3A",61.8165589034065,-0.0200869602999245,0.241443416944935,-0.0831953115727553,0.93369624064047,0.986839883463998  
"14585","OSBPL8",759.690632656792,0.0154142445534869,0.184929666801973,0.08335192952028,0.933571710125899,0.986839883463998  
"14586","AC011447.3",6.57341224122401,0.0499426669777421,0.600629130779433,0.0831505906364077,0.933731799578428,0.986839883463998

"14587","OSCP1",46.3695870582369,-0.0248745977171471,0.301326720490835,-0.082550255339548,0.934209156685713,0.987069267189191  
"14588","RNPC3",112.475043373114,-0.0243039599037036,0.294162674299286,-0.0826208150357523,0.934153049854813,0.987069267189191  
"14589","LINC01142",3.30670696928168,-0.0943272208302036,1.14659770649007,-0.0822670587044476,0.934434348946721,0.987069267189191  
"14590","TGFB2",68.1317624620128,0.0341564301329422,0.41282281479114,0.0827387172150915,0.934059298513984,0.987069267189191  
"14591","HYAL2",127.237701807085,-0.0252505939314959,0.306256607864143,-0.0824491399796903,0.934289560980197,0.987069267189191  
"14592","AC005229.4",13.3225456603709,-0.0336319191515221,0.408512351434161,-0.0823277901719515,0.934386056064287,0.987069267189191  
"14593","SERPING1",5982.15793111323,0.012814143294815,0.155899489967738,0.0821949019683567,0.934491727369521,0.987069267189191  
"14594","FAM234B",15.2212036152158,0.0371850371783302,0.4524451885037,0.0821868330643683,0.934498143714502,0.987069267189191  
"14595","CYLD",121.281182064702,-0.020742635285685,0.252879808208996,-0.0820256683702557,0.93462630182181,0.987136995038245  
"14596","KRCC1",275.119664154881,0.0109509758541796,0.133901486112066,0.0817838260959585,0.934818617889741,0.987171365142063  
"14597","MAK16",52.5125704878296,-0.0213005825294027,0.260413112532726,-0.0817953532456085,0.934809451266571,0.987171365142063  
"14598","CLK3",120.293435713665,0.0157339299440784,0.192480097752494,0.0817431522936479,0.934850962591232,0.987171365142063  
"14599","AC096586.1",3.62347106790465,0.0884335330236382,1.08572193595884,0.0814513643822984,0.935083001900755,0.9872160298597  
"14600","CWF19L1",31.1438658821694,0.0234165070360023,0.287388503585432,0.0814803193024777,0.935059975752529,0.9872160298597  
"14601","TLE3",152.596557156455,-0.0176042094578092,0.21619084193766,-0.0814290249301377,0.935100767192739,0.9872160298597  
"14602","GNA01",8.03924128621645,-0.051105421369764,0.628078933278246,-0.0813678323885507,0.935149430295903,0.9872160298597  
"14603","IQCC",7.39881731975777,0.044274040714593,0.54629204603964,0.0810446372696781,0.935406453826842,0.987352128577155  
"14604","FAM98A",104.014747196473,-0.0173119968258771,0.213568595244971,-0.0810605922936356,0.93539376530687,0.987352128577155  
"14605","VKORC1",1343.3142396369,-0.0209134676669995,0.258325553163087,-0.080957796899776,0.935475515481614,0.987357416716815  
"14606","NCAPD3",29.647990975215,-0.0243064954626325,0.300605233095416,-0.0808585240261514,0.935554464944659,0.987373139608512  
"14607","ABHD14A",387.956529669408,0.0228934868011723,0.28470841638943,0.0804102916643606,0.935910941847055,0.987392038946908  
"14608","ZDHHC11B",11.8314325948889,-0.0693964133728027,0.863763889555979,-0.0803418783904895,0.935965351705447,0.987392038946908  
"14609","ARSB",27.6612710960557,-0.0272669047531713,0.339680451748323,-0.080272223573054,0.936020750251779,0.987392038946908  
"14610","FURIN",93.0092570071368,0.0147737828570645,0.183545975480737,0.0804909114371455,0.935846824404812,0.987392038946908  
"14611","FXD1",1684.93809330921,0.022744812032017,0.283023437919758,0.0803637048549512,0.935947992836376,0.987392038946908

"14612", "ARFGAP1", 60.6912833433626, -0.0197757094748857, 0.2458706418947  
25, -0.0804313574101014, 0.935894188079033, 0.987392038946908  
"14613", "TBL1X", 105.882626054617, 0.0190800577434417, 0.237535391283131,  
0.0803251155138362, 0.935978683458406, 0.987392038946908  
"14614", "SHLD2", 137.359353753753, -0.0143623100724834, 0.179401045375373  
, -0.0800570032489622, 0.93619191937298, 0.987505025122108  
"14615", "HGS", 159.99253857641, 0.0154488401826152, 0.193381526503434, 0.0  
798878799953049, 0.936326429381781, 0.987579330066381  
"14616", "SHISA5", 376.509044411887, 0.0144792388856317, 0.183166563457615  
, 0.0790495743999815, 0.936993191731522, 0.987927710568382  
"14617", "POLR2J3", 233.56450987122, -0.0208497978321038, 0.26362380097523  
4, -0.0790892087701234, 0.936961666780203, 0.987927710568382  
"14618", "ETFBKMT", 50.0868499758998, -0.0202287637210159, 0.2560955096300  
64, -0.0789891386625124, 0.937041262161551, 0.987927710568382  
"14619", "ELF1", 412.151717515151, 0.0165528399836632, 0.209053789670053, 0  
.0791798130509295, 0.936889601024704, 0.987927710568382  
"14620", "SLC9A3R2", 62.4272393540996, -0.0292290725794461, 0.368787163529  
139, -0.0792572938269762, 0.936827973986132, 0.987927710568382  
"14621", "RAB12", 109.733694766111, 0.0236341672800411, 0.297941105421546,  
0.0793249633903384, 0.936774150947472, 0.987927710568382  
"14622", "FANCL", 48.1015782377351, -0.0213084907322279, 0.270526508934589  
, -0.0787667382991293, 0.937218160812843, 0.988013072038063  
"14623", "IFITM2", 1759.00766715853, -0.0192432125591305, 0.24443216567937  
5, -0.078726187716113, 0.937250415336529, 0.988013072038063  
"14624", "RAPGEF6", 69.5952580402813, 0.0217730536792679, 0.27733100331618  
4, 0.0785092666125199, 0.937422959285629, 0.988127387676968  
"14625", "AC006059.5", 2.4726744623735, -0.0752985398057159, 0.96734813554  
5119, -0.0778401663670791, 0.937955195220845, 0.988414362280836  
"14626", "UBE2K", 377.931798359147, -0.0114562479359991, 0.147211543789639  
, -0.0778216683358051, 0.937969909878704, 0.988414362280836  
"14627", "AC008966.1", 6.50473516937452, -0.0549742615248085, 0.7113615484  
06663, -0.0772803388768231, 0.93840053142913, 0.988414362280836  
"14628", "ZNF484", 22.9707197567726, 0.0253770222014076, 0.327842777028212  
, 0.0774060738242947, 0.938300509069158, 0.988414362280836  
"14629", "PRKCQ-  
AS1", 2.8733203414893, 0.0671553709665548, 0.861663186535648, 0.0779369155  
093601, 0.937878234374683, 0.988414362280836  
"14630", "PAWR", 52.2060909807814, -0.0437374818958823, 0.564624253151952,  
-0.0774629882647135, 0.938255233857044, 0.988414362280836  
"14631", "AC108134.2", 36.1669626452384, -0.03001189370383, 0.386917665748  
718, -0.07756661522744, 0.938172799530981, 0.988414362280836  
"14632", "MYO15B", 51.0746568882916, -0.027566834703194, 0.355581905836618  
, -0.0775259771397378, 0.938205126688947, 0.988414362280836  
"14633", "CD7", 7.56459703000407, -0.0539428805727268, 0.692721191652959, -  
0.0778709836261963, 0.937930681014605, 0.988414362280836  
"14634", "MBD1", 101.000011175894, 0.0155447588936187, 0.201070393558214, 0  
.0773100336580291, 0.938376909093539, 0.988414362280836  
"14635", "RANBP3", 117.994574753037, -0.0150715392740323, 0.19397533052361  
2, -0.077698227054691, 0.938068104449678, 0.988414362280836  
"14636", "DDX10", 74.7026616589238, 0.0172216704067466, 0.22352779906082, 0

.0770448708353304,0.938587849261154,0.988544116996494  
"14637","NEMP2",19.4611958241887,-0.027182117179275,0.353722420422098,  
-0.0768458983935439,0.938746137027312,0.988575741376965  
"14638","AC048382.6",6.96476206042787,0.0441925635045076,0.57449934776  
6089,0.0769236095329753,0.938684315500993,0.988575741376965  
"14639","COPS4",225.21761830338,-0.0165852504279898,0.217610787287739,  
-0.0762152034589156,0.939247887259561,0.988622566108187  
"14640","ITGA1",5.68900482647198,-0.0572719998104294,0.749534050700871  
,-0.0764101374138716,0.939092804696097,0.988622566108187  
"14641","VSTM5",2.36311195006746,-0.0759477057628387,0.997392574326239  
,-0.0761462514538401,0.93930274358922,0.988622566108187  
"14642","MSANTD2",53.8430770716406,0.0170648449058718,0.22493810742612  
8,0.0758646238342522,0.939526801809756,0.988622566108187  
"14643","AL079343.1",29.6562946576271,0.027833608697237,0.366839198273  
39,0.0758741400271345,0.939519230807725,0.988622566108187  
"14644","AC020765.2",9.812601279947,0.0411354223160992,0.5436776805909  
03,0.0756614144457625,0.939688474772439,0.988622566108187  
"14645","MAP3K14",33.2920110213947,-0.0257214905656246,0.3387159995270  
02,-0.0759382214053758,0.939468248351207,0.988622566108187  
"14646","CEP112",79.78617269879,0.016254098762117,0.211970115284419,0.  
0766810865782065,0.938877250957228,0.988622566108187  
"14647","AC132872.1",22.5901395972774,-0.0275043364039331,0.3610848691  
31213,-0.0761713900394381,0.939282743984589,0.988622566108187  
"14648","WIZ",88.2429027643788,0.0147266837378169,0.19408034670855,0.0  
758793148691763,0.939515113749753,0.988622566108187  
"14649","LINC00665",25.871338177889,-0.0363501720776999,0.478259117850  
237,-0.0760051836357935,0.939414974184702,0.988622566108187  
"14650","PIGP",291.130742592304,0.0256313913030096,0.337083081305709,0.  
0760387949573886,0.939388233613352,0.988622566108187  
"14651","BX890604.2",2.75654056655402,-0.0668583839872688,0.8823050914  
46043,-0.075776944546123,0.93959655896193,0.988622566108187  
"14652","MAGED2",694.281755206813,-0.021989445873579,0.290625186241639  
,-0.0756625609705276,0.939687562592765,0.988622566108187  
"14653","AC024909.1",3.1783578349897,-0.0724379331190653,0.95980544996  
1806,-0.0754714751014884,0.939839592363516,0.988714073314925  
"14654","ANKRD36",71.6666897661482,0.024735186672704,0.33329957322619,  
0.0742130763423383,0.940840841127907,0.988822633530148  
"14655","ZNF35",20.9260774246942,0.029885097094665,0.402374762327199,0.  
0742717980666078,0.940794116918849,0.988822633530148  
"14656","PDHB",217.477668825426,-0.0164716825047871,0.221300715766055,  
-0.0744312211000705,0.94066726684988,0.988822633530148  
"14657","MED12L",2.65161838231768,0.0639092991282121,0.85791499504506,  
0.0744937429667556,0.940617519724576,0.988822633530148  
"14658","SORCS2",31.802914499995,-0.0412015756710751,0.55410198692143,  
-0.0743573866247793,0.940726015440207,0.988822633530148  
"14659","TEC",4.42216486713587,-0.0552701347895841,0.736558864729282,-  
0.0750383132105786,0.940184228274801,0.988822633530148  
"14660","ARMH3",46.2331476187559,0.0188253420275003,0.252410367857571,  
0.074582285138632,0.940547069273144,0.988822633530148  
"14661","AC016957.2",3.81914310134812,0.0613788860819565,0.82439599940

0093,0.0744531585871613,0.94064981169977,0.988822633530148  
"14662","LACC1",26.9350531965544,0.0254794090325977,0.342092892860193,  
0.0744809657387729,0.940627686234597,0.988822633530148  
"14663","RCN2",401.637493221365,-0.0156263328038159,0.207735030100735,  
-0.0752224253956511,0.940037742015183,0.988822633530148  
"14664","COR01A",28.0970759395332,0.0342045743451184,0.459799515526292  
,0.0743901922253386,0.940699912651213,0.988822633530148  
"14665","TAF1C",44.5003416720773,0.021460915137875,0.287106166468061,0  
.074749056775353,0.940414375157532,0.988822633530148  
"14666","DBP",125.173793826774,-0.051614471215948,0.692806961776636,-0  
.074500508891521,0.940612136257055,0.988822633530148  
"14667","CST3",18363.7084157985,-0.0217530210736484,0.289987730225743,  
-0.0750135912878611,0.940203898077661,0.988822633530148  
"14668","OXSM",18.1903064123414,0.0330477125197915,0.446020628449466,0  
.0740945831018572,0.940935125473379,0.988854305915744  
"14669","POLR3E",62.5498853018594,-0.0172435677886302,0.23308480543308  
7,-0.0739798021436468,0.941026456767903,0.9888828707531  
"14670","RAP1A",566.377671499285,0.0111714654370364,0.152084575826372,  
0.0734556109739251,0.941443565915063,0.989118904619732  
"14671","TBC1D23",197.510928781027,-0.0139034321802144,0.1890882270420  
95,-0.0735288092638319,0.941385319639392,0.989118904619732  
"14672","HSPH1",181.380999595096,-0.019020501101461,0.258840625279879,  
-0.073483445965619,0.941421416663981,0.989118904619732  
"14673","DRAM2",254.297901003851,0.018780289457562,0.256776946708576,0  
.073138534040115,0.941695878024483,0.989181734906126  
"14674","SLC36A1",36.3032315981548,-0.0204129038231484,0.2790492525452  
95,-0.0731516162002082,0.941685467856455,0.989181734906126  
"14675","NUP205",39.7475860441555,-0.0197739571180577,0.26978607416544  
, -0.0732949511172019,0.941571409320418,0.989181734906126  
"14676","CEP78",53.7575930886843,0.0243361395959517,0.33367752810019,0  
.072933109204299,0.941859346757154,0.989218629846803  
"14677","SNX12",75.9637262602986,-0.0161976619270052,0.221990584769695  
, -0.0729655356501246,0.941833542946919,0.989218629846803  
"14678","TDG",177.230831191137,-0.0137615718764905,0.189378444740614,-  
0.0726670445273708,0.942071073849344,0.989373593363376  
"14679","AL139089.1",3.06135730610473,-0.0681368861900435,0.9424847443  
99154,-0.0722949486397062,0.942367184580994,0.98937801443727  
"14680","CMA1",4.77181685732138,0.0630401757291448,0.869787094386666,0  
.072477708781823,0.942221744621781,0.98937801443727  
"14681","CGNL1",8.2251375178789,-0.0627019310193069,0.864869340923775,  
-0.0724987325280075,0.942205014112666,0.98937801443727  
"14682","UBALD2",208.729908982731,0.0176344078215271,0.244046167445069  
,0.072258491113147,0.942396197598601,0.98937801443727  
"14683","MPST",317.870978723332,0.0163563890152508,0.226269249848378,0  
.0722872817504415,0.942373285909931,0.98937801443727  
"14684","AC079807.1",5.88181023212505,-0.0444538232564801,0.6169381231  
35654,-0.0720555621211068,0.94255769054277,0.989451125464066  
"14685","FBXW4",82.2630563710718,-0.0169520950446508,0.23541414576853,  
-0.0720096704015353,0.942594211964957,0.989451125464066  
"14686","ZNF143",79.0759338387268,-0.0206577547731995,0.28727840449978

1,-0.0719084847646988,0.942674737666782,0.989468274624366  
"14687","CLMP",598.684516934878,0.0134913064843608,0.187868613949323,0  
.0718124555280962,0.942751160336517,0.989481115039654  
"14688","AC139768.1",8.96254011641057,-0.0356468553250516,0.4969485586  
90072,-0.071731479449331,0.942815603704773,0.989481381475291  
"14689","CIART",4.32771953602296,0.0878804453922917,1.22809953150133,0  
.0715580807077252,0.942953601259551,0.989509642707611  
"14690","PHYHD1",256.085559984236,0.0214141190649436,0.299625346655654  
,0.0714696513628198,0.943023977478073,0.989509642707611  
"14691","SPRYD4",31.2950040071696,-0.0238172153161524,0.33331457085944  
6,-0.0714556680037724,0.943035106131529,0.989509642707611  
"14692","PPP3R1",113.362336713686,-0.0152358437663536,0.21383409621700  
3,-0.0712507688712655,0.943198176338586,0.989613387439376  
"14693","LINC00710",15.647976435569,-0.0440277718593603,0.619360864238  
061,-0.0710858150740979,0.943329457540339,0.989645422087288  
"14694","C10orf88",33.623710886779,-0.0265258470637767,0.3733349324314  
2,-0.0710510717307426,0.94335710879991,0.989645422087288  
"14695","LRIG1",36.1146727667263,0.0244183449283347,0.344268355637002,  
0.0709282294713183,0.943454876080827,0.989680633874511  
"14696","GPR158",4.69135021838741,-0.0458550943085362,0.64755351840916  
6,-0.0708128255116081,0.943546724169054,0.989709632081244  
"14697","AL050343.2",4.54868646167089,0.0504846339134975,0.71878220453  
4697,0.0702363436309315,0.944005547705706,0.989831031884043  
"14698","CCDC150",10.2280331198772,0.0376168444575903,0.53294150003517  
3,0.0705834401244934,0.943729290403269,0.989831031884043  
"14699","BTBD9",27.2516082542242,-0.0230511860222965,0.327978822108906  
, -0.0702825440803685,0.943968775952348,0.989831031884043  
"14700","ARHGAP33",20.1396374760002,0.0259140863933508,0.3692341594656  
03,0.070183339566568,0.944047734723269,0.989831031884043  
"14701","ZNF773",16.335413757011,-0.0341018542441199,0.484899195104035  
, -0.0703277188092742,0.943932820703522,0.989831031884043  
"14702","SPTLC3",34.4525391408908,-0.0269234376483939,0.38355476654592  
7,-0.0701945067476304,0.944038846522692,0.989831031884043  
"14703","PRR26",2.91783066102419,0.0706117350019751,1.00833312564964,0  
.0700281813676227,0.944171229204948,0.98989318494146  
"14704","PEX14",39.5973658831959,0.0201760221946198,0.290073669783018,  
0.0695548210553271,0.944547997376735,0.990153511020903  
"14705","MYH9",380.56002773174,0.0141324978235206,0.202978402092213,0.  
0696256236025553,0.944491641742299,0.990153511020903  
"14706","ZNF831",5.37201673643029,-0.0623846760454069,0.89969489712205  
5,-0.0693398131355008,0.944719135684062,0.990265570282185  
"14707","LINC01409",11.3531825572954,0.0315496505523189,0.459453034681  
659,0.0686678467020655,0.945254012384246,0.99027255235029  
"14708","LEPROT",1536.75454896479,-0.00876335189164409,0.1308136553067  
23,-0.0669911093845391,0.946588780984854,0.99027255235029  
"14709","ZNF385D",86.2071569536483,0.0294589697563378,0.42742617165424  
6,0.0689217734195456,0.945051887045612,0.99027255235029  
"14710","NCKIPSD",42.1161319633224,-0.0204740114025501,0.3011007021929  
72,-0.0679972223692409,0.94578784539686,0.99027255235029  
"14711","ACAD9",91.8742373228433,-0.0169235779233427,0.248326499338782

, -0.0681505113969112, 0.945665821508744, 0.99027255235029  
"14712", "SENP2", 110.287837745738, -0.0133879957377136, 0.195307047314588  
, -0.0685484518955891, 0.945349051714715, 0.99027255235029  
"14713", "LINC02362", 3.15273926152254, 0.0623402212950314, 0.930513213918  
276, 0.0669955250098216, 0.946585265722904, 0.99027255235029  
"14714", "ZC3H12D", 4.18757741481667, -0.0540616069358648, 0.7942857818946  
53, -0.0680631684063496, 0.945735349690561, 0.99027255235029  
"14715", "FSCN1", 212.578828781943, -0.0237873303537294, 0.35447614339689,  
-0.0671055889002266, 0.946497644628093, 0.99027255235029  
"14716", "BRI3", 2378.71189918526, -0.0169208051355274, 0.249675210617617,  
-0.0677712660927398, 0.945967717493425, 0.99027255235029  
"14717", "TPK1", 42.8041175550051, 0.0193852759328256, 0.286150158648925, 0.  
.0677451168447863, 0.945988533734277, 0.99027255235029  
"14718", "PPP3CC", 73.1751146938267, 0.0135995152681307, 0.199354015801046  
, 0.0682179148159368, 0.94561216623047, 0.99027255235029  
"14719", "AC107959.1", 31.8851501572961, 0.0255403149194587, 0.37967161324  
0777, 0.067269487706635, 0.946367167132167, 0.99027255235029  
"14720", "AP002784.1", 7.21097303046561, -0.0482688412403528, 0.7148032146  
10037, -0.0675274540653626, 0.94616180671837, 0.99027255235029  
"14721", "TRHDE", 11.6008989008798, -0.0615647115840951, 0.909989960841826  
, -0.0676542755780976, 0.946060848669726, 0.99027255235029  
"14722", "WSCD2", 65.6811379486649, 0.0232954574156304, 0.344154487664903,  
0.0676889543811871, 0.946033242271604, 0.99027255235029  
"14723", "IFI27L2", 1193.40813942381, 0.0183708061894733, 0.26891464718518  
4, 0.0683146358213153, 0.945535173646451, 0.99027255235029  
"14724", "ARHGAP17", 111.673698099777, -0.0137628776598828, 0.205371992473  
051, -0.0670143844550213, 0.946570251804337, 0.99027255235029  
"14725", "PSMB10", 275.630071516503, -0.0182956797694184, 0.26630374606679  
8, -0.068702299684621, 0.945226587647756, 0.99027255235029  
"14726", "TNFSF9", 201.389687375105, 0.0241377805514468, 0.353520863357933  
, 0.0682782349029504, 0.945564149720304, 0.99027255235029  
"14727", "TMEM147-  
AS1", 4.19440893489487, 0.0462660998199788, 0.678583472728613, 0.068180410  
633847, 0.945642020729017, 0.99027255235029  
"14728", "POU2F2", 4.22389358633767, 0.0625892440717456, 0.930963716467502  
, 0.0672305944524214, 0.946398129365597, 0.99027255235029  
"14729", "ZNF615", 28.972528967926, 0.0216843308185063, 0.322871357648918,  
0.0671608995496134, 0.94645361245049, 0.99027255235029  
"14730", "ZNF816", 13.0336428125814, -0.0305733286442653, 0.44284964282057  
3, -0.0690377177444232, 0.944959596688559, 0.99027255235029  
"14731", "ZNF761", 35.8498860813291, -0.0221497865107144, 0.32767866843922  
4, -0.0675960587126918, 0.946107192916655, 0.99027255235029  
"14732", "TFPT", 52.8171966612554, 0.018993615493865, 0.275299699603204, 0.  
0689925035197674, 0.944995586606665, 0.99027255235029  
"14733", "AL050309.1", 45.9155795267529, -0.0191121638461182, 0.2849932945  
82872, -0.0670618018367467, 0.9465325031262, 0.99027255235029  
"14734", "NHSL2", 62.8233743528506, 0.0341952369152222, 0.504141418490331,  
0.0678286600962504, 0.945922028836529, 0.99027255235029  
"14735", "SASH3", 3.75595286996824, -0.0810157693699014, 1.20172431273272,  
-0.0674162688659193, 0.946250317971259, 0.99027255235029

"14736", "ELF4", 44.9025891325052, -0.022701844392088, 0.339374200878366, -0.0668932533272454, 0.946666684074589, 0.9902868441239  
"14737", "EIF4E2", 361.174976740676, 0.0143993996140396, 0.216206846251867, 0.0666001094029428, 0.946900058649807, 0.990335512643503  
"14738", "LRCH1", 49.7244403039621, 0.0169894058009543, 0.255291613054176, 0.0665490166233898, 0.946940734548524, 0.990335512643503  
"14739", "GNPTG", 360.43012274391, 0.0135841173185641, 0.204235525759525, 0.0665120197284316, 0.946970188541371, 0.990335512643503  
"14740", "NKRFB", 33.3673123563514, 0.0176615149406316, 0.265144399832667, 0.0666109295605632, 0.946891444541667, 0.990335512643503  
"14741", "DAB1", 2.69531446564979, 0.0684437388992629, 1.03493962788894, 0.0661330739058412, 0.947271879309999, 0.990516620510353  
"14742", "LINC02422", 3.29317075443865, 0.0540451912671206, 0.816525831344658, 0.0661891996461628, 0.947227195352892, 0.990516620510353  
"14743", "VIRMA", 162.580773660385, 0.0121659934686401, 0.184280034446977, 0.0660190535841291, 0.947362655980234, 0.990544349313932  
"14744", "GTF2IRD2", 112.927914741653, -0.0208237820706036, 0.31585880397229, -0.0659275024432452, 0.947435544426805, 0.990553372038741  
"14745", "PIAS3", 63.7245615850418, -0.0166026620333564, 0.254594429369012, -0.0652121968045589, 0.948005050155264, 0.990590992182684  
"14746", "EPC2", 148.416641293478, 0.0130784954540303, 0.201304916536828, 0.0649685843695607, 0.94819901343215, 0.990590992182684  
"14747", "UMAD1", 61.5074242045863, 0.0146389867096084, 0.224793727058098, 0.0651218648366685, 0.94807697175927, 0.990590992182684  
"14748", "NSD3", 628.883823502164, 0.00852395263641486, 0.130144586246702, 0.0654960216344065, 0.947779073812497, 0.990590992182684  
"14749", "CAMSAP1", 42.2343999360648, 0.0208614510157147, 0.319940683863912, 0.0652041208506894, 0.948011480149127, 0.990590992182684  
"14750", "NTF3", 2.98090262654003, -0.0723756795277515, 1.10886844718492, -0.0652698520834384, 0.947959145696103, 0.990590992182684  
"14751", "RILPL1", 122.323832179438, 0.0125297001848314, 0.191154063897484, 0.0655476526596425, 0.947737966548407, 0.990590992182684  
"14752", "AC022613.3", 9.43463785031035, -0.0578165399199706, 0.891006819544114, -0.0648889982116552, 0.94826238028856, 0.990590992182684  
"14753", "PIGB", 25.3977749691178, 0.0261376016979169, 0.401312762842174, 0.0651302528053317, 0.948070293306612, 0.990590992182684  
"14754", "G6PC3", 109.209855867428, -0.0163306358440233, 0.251820603423126, -0.0648502768321284, 0.948293210543233, 0.990590992182684  
"14755", "OGFOD3", 164.486188112845, -0.0156691057369603, 0.238944441037056, -0.0655763560305229, 0.947715113739743, 0.990590992182684  
"14756", "C22orf23", 5.08573307857781, 0.0422233610855437, 0.647026743614085, 0.0652575206547066, 0.947968963821011, 0.990590992182684  
"14757", "SUV39H1", 7.13793289908518, 0.0356888038229235, 0.550472385107567, 0.0648330502827124, 0.9483069264768, 0.990590992182684  
"14758", "TFDP2", 380.56600002563, -0.0116572033275546, 0.181198916767645, -0.0643337362910555, 0.948704491407857, 0.990939133693733  
"14759", "AL121944.1", 21.5754091157987, 0.0216923359806356, 0.337728719952634, 0.0642300601017228, 0.948787042305439, 0.990950898488634  
"14760", "AL133227.1", 2.39477965888151, 0.0682645730793232, 1.06400520516087, 0.0641581194793139, 0.948844324469169, 0.990950898488634



"14761", "TRAF3IP2-  
AS1", 50.331012410841, -0.015097671922524, 0.236200521837128, -0.063918876  
2374309, 0.949034821948614, 0.991082703091788  
"14762", "HNRNPL", 262.772562419462, -0.0149375352866749, 0.23479836676339  
8, -0.0636185655487425, 0.949273948516967, 0.991265270043967  
"14763", "ALG12", 66.212641788355, 0.013701656316303, 0.215748350054076, 0.  
0635075833157879, 0.949362320822935, 0.991290400019342  
"14764", "NEXN", 389.51703482948, 0.0174435707763359, 0.280006244510067, 0.  
0622970777200248, 0.950326255600317, 0.991475233101457  
"14765", "C1orf74", 3.722564813071, -0.0456501329884189, 0.728326083827466  
, -0.0626781520009834, 0.950022795356488, 0.991475233101457  
"14766", "FHL2", 101.238893241355, 0.0322230884719346, 0.519630092197146, 0.  
.0620115904675306, 0.950553601908506, 0.991475233101457  
"14767", "OXNAD1", 21.1752085140336, -0.0211044500515245, 0.33737874589492  
2, -0.0625541777848021, 0.950121518743083, 0.991475233101457  
"14768", "NADK2", 110.498954487838, -0.014318450440854, 0.230811115674606,  
-0.0620353590814057, 0.950534673740992, 0.991475233101457  
"14769", "VCAN", 3371.96539770664, 0.0177272739598446, 0.283491089562881, 0.  
.0625320322666176, 0.950139153785414, 0.991475233101457  
"14770", "PITX1", 3.19446172497632, 0.0721468391735193, 1.16075656938992, 0.  
.0621550125806643, 0.950439387940609, 0.991475233101457  
"14771", "MRAP2", 5.98903379197052, -0.114345417190929, 1.84851520861369, -  
0.0618579802092533, 0.950675930315858, 0.991475233101457  
"14772", "SYNE1", 703.456316020989, -0.0179092607681762, 0.28711936943772,  
-0.062375662092212, 0.95026367604777, 0.991475233101457  
"14773", "FNDC1", 646.181363425044, -0.023945293149526, 0.382333094576329,  
-0.0626294021867509, 0.950061615811013, 0.991475233101457  
"14774", "POP1", 17.4275844888246, -0.0260454601084494, 0.422043201065204,  
-0.06171278211025, 0.950791560720762, 0.991475233101457  
"14775", "PCAT1", 6.03413941942956, 0.052222767971392, 0.842224606681505, 0.  
.0620057494842828, 0.950558253387614, 0.991475233101457  
"14776", "SLC15A3", 42.1157532751614, -0.0161876489310249, 0.2568723074110  
3, -0.06301827197403, 0.949751954308245, 0.991475233101457  
"14777", "FKBP3", 398.218500347148, -0.0132892033792551, 0.213488807169017  
, -0.062247756819083, 0.950365516736994, 0.991475233101457  
"14778", "NEMF", 290.728380004473, -0.0125028886342567, 0.19974725580437, -  
0.0625935439458648, 0.950090170522861, 0.991475233101457  
"14779", "TRIM9", 9.04369895251222, -0.0458258498965785, 0.74060590537923,  
-0.0618761605379223, 0.950661452246487, 0.991475233101457  
"14780", "VPS33B-  
DT", 2.43436581661527, -0.0563456105608403, 0.908408607626195, -0.06202672  
46345008, 0.950541549791129, 0.991475233101457  
"14781", "SLC16A5", 23.2404525160119, 0.0206136325021531, 0.33425761395023  
2, 0.0616698966361384, 0.950825713327203, 0.991475233101457  
"14782", "ZSWIM4", 13.2987278241795, 0.0289197692036749, 0.468701472307102  
, 0.061701895369183, 0.950800230561164, 0.991475233101457  
"14783", "NAGA", 92.4037047735818, -0.0185486934232915, 0.295988753525556,  
-0.0626668858270995, 0.950031766826107, 0.991475233101457  
"14784", "CTNNB1", 628.232954254949, 0.013747869386766, 0.226850660575704,  
0.0606031710548099, 0.951675248031866, 0.991532025048369

"14785", "RHOA", 2514.09889622238, 0.0127300535281131, 0.209380355387227, 0.0607987005493912, 0.951519525220053, 0.991532025048369  
"14786", "ATG3", 251.397152221649, 0.00971960422156941, 0.158670066669661, 0.0612566971551408, 0.951154776666542, 0.991532025048369  
"14787", "PCDHB6", 7.01195266708445, 0.0400597295411902, 0.654787101345519, 0.0611797780665985, 0.951216034325268, 0.991532025048369  
"14788", "NR3C1", 1038.8319177858, -0.00868555089286193, 0.143456626479557, -0.0605447869924617, 0.951721746389457, 0.991532025048369  
"14789", "HLA-F", 127.338557758641, -0.0259638842990141, 0.427785588232469, -0.0606936863074142, 0.951603160009541, 0.991532025048369  
"14790", "LINC00476", 42.062973074437, 0.0174705595035932, 0.288611492616747, 0.0605331386674637, 0.951731023392596, 0.991532025048369  
"14791", "BAG3", 343.463946205135, -0.0187040307636154, 0.306465757949098, -0.0610313885922684, 0.951334211159846, 0.991532025048369  
"14792", "DUSP8", 25.5963284646239, 0.0298505207658992, 0.492615640702176, 0.0605959663062061, 0.95168098604399, 0.991532025048369  
"14793", "CTSD", 1232.56677953591, 0.0134534635694393, 0.222478773735539, 0.0604707736542609, 0.951780692483991, 0.991532025048369  
"14794", "RBM19", 63.8257177268445, 0.0160847612335713, 0.265887686312704, 0.0604945699315102, 0.951761740498129, 0.991532025048369  
"14795", "PROCA1", 10.7567804904762, -0.0352740142420462, 0.576900714894013, -0.0611439946794426, 0.951244531985846, 0.991532025048369  
"14796", "BLMH", 95.8378996145032, -0.0130657168727287, 0.212382867633766, -0.0615196367687214, 0.950945376144678, 0.991532025048369  
"14797", "SARS2", 24.266107958357, -0.0206282078995781, 0.335813471216105, -0.0614275771155807, 0.951018690462048, 0.991532025048369  
"14798", "MIR4453HG", 5.96537299724947, -0.0353449118420554, 0.58732205375297, -0.0601797797583157, 0.952012449937355, 0.99170644112612  
"14799", "AL353796.1", 3.66707774070318, -0.0500139981135735, 0.834859776241159, -0.0599070640805749, 0.952229653679515, 0.991865674131341  
"14800", "SOCS4", 61.9466715071806, 0.0178568575516555, 0.299803375814053, 0.0595618962033665, 0.952504566886705, 0.991883935591336  
"14801", "AL162171.3", 4.80295731945897, 0.0425140223306843, 0.713184365792312, 0.0596115455832425, 0.952465022677789, 0.991883935591336  
"14802", "IFI27", 3006.32609541438, -0.0269074132554542, 0.451458675982432, -0.0596010547297607, 0.952473378311209, 0.991883935591336  
"14803", "ZNF592", 58.8971736009891, 0.0146609362360354, 0.245820919344943, 0.0596407184348, 0.95244178745049, 0.991883935591336  
"14804", "VAMP3", 318.908642592789, 0.0109887422035428, 0.185324923832773, 0.0592944649660745, 0.952717569677192, 0.991904723529239  
"14805", "SPR", 93.2692485490074, -0.0138003321233041, 0.232668736126901, -0.0593132208178463, 0.952702630965069, 0.991904723529239  
"14806", "AC017033.1", 3.12858696387442, -0.0539737247507183, 0.908463918825358, -0.0594120730964266, 0.95262389710657, 0.991904723529239  
"14807", "NIFK-AS1", 64.2070309968356, 0.0149896042752715, 0.253398767451721, 0.0591542114668232, 0.952829279694175, 0.991954031639474  
"14808", "ZNF407", 58.5581388783679, -0.015339137160569, 0.259805001605391, -0.0590409617435581, 0.952919482244901, 0.991980944003589

"14809", "WDT1", 107.77273438178, 0.0134777088846267, 0.231477196329595, 0.0582247802303434, 0.953569582432518, 0.992106475996741  
"14810", "ACTR2", 713.574070915225, -0.00980835679403786, 0.167193721727008, -0.0586646238430702, 0.953219236871067, 0.992106475996741  
"14811", "KIF5C", 3.7797617651712, -0.0535490855608844, 0.916436325867387, -0.0584318670587412, 0.953404631885311, 0.992106475996741  
"14812", "UBP1", 79.6070734949925, -0.0124943658915186, 0.212874393023455, -0.0586936066572459, 0.9531961517092, 0.992106475996741  
"14813", "C3orf33", 31.8473511752382, -0.021014822388097, 0.359633744628084, -0.0584339559398952, 0.953402968042232, 0.992106475996741  
"14814", "GOLGA1", 69.6886493295815, 0.0151882353658532, 0.260721754805528, 0.0582545763286309, 0.953545848870335, 0.992106475996741  
"14815", "OS9", 824.844317035146, -0.00864499213881676, 0.148635534509704, -0.0581623510645251, 0.95361930942872, 0.992106475996741  
"14816", "FGF14-IT1", 3.84900625306934, 0.0453749515476282, 0.778347177454348, 0.0582965453745601, 0.953512419228996, 0.992106475996741  
"14817", "AC011825.4", 2.37439936200768, -0.0549871414221607, 0.940378965103125, -0.0584733851592806, 0.953371561777659, 0.992106475996741  
"14818", "CASP3", 110.491909390913, 0.0118132283758666, 0.204317709785208, 0.0578179365278, 0.953893650795346, 0.992314720379447  
"14819", "NDUFA2", 674.989179378876, 0.0152547937943341, 0.264154892384472, 0.0577494274538404, 0.953948221946353, 0.992314720379447  
"14820", "ASF1A", 123.115317116742, 0.0130290554473005, 0.226660425591264, 0.0574827097112919, 0.95416067898438, 0.992334831098652  
"14821", "PARP4", 216.597228201153, 0.00903470260165364, 0.157110172228861, 0.057505522866418, 0.954142506779735, 0.992334831098652  
"14822", "CCDC113", 14.0097412342628, -0.0276724942327715, 0.480943780534685, -0.0575378980928018, 0.954116717786392, 0.992334831098652  
"14823", "KLHL17", 8.07892046928699, -0.0277149874018764, 0.508754625114143, -0.0544761384639173, 0.956555819100922, 0.992533124265062  
"14824", "SCNN1D", 6.10129610543372, -0.0325226237921777, 0.594779736957613, -0.0546801139503099, 0.956393312425316, 0.992533124265062  
"14825", "NBPF1", 76.9521433611061, -0.0154980761508573, 0.28122701878813, -0.0551087737502676, 0.956051806326765, 0.992533124265062  
"14826", "CLSPN", 2.76148972715861, -0.0589594930839731, 1.05363810917539, -0.0559580111715174, 0.955375256949745, 0.992533124265062  
"14827", "TMEM53", 25.9443048709583, -0.0200293593928411, 0.356395732440745, -0.0561997733689789, 0.955182661704518, 0.992533124265062  
"14828", "OSBPL9", 254.959927444209, -0.00954351244448771, 0.167117209834828, -0.0571067004644233, 0.954460198937177, 0.992533124265062  
"14829", "CYB561D1", 28.8191912810477, 0.0162071805912032, 0.301066240766985, 0.0538326069037646, 0.957068530623307, 0.992533124265062  
"14830", "CRT2", 74.6218130763337, -0.012876393905038, 0.239327594359681, -0.053802378866878, 0.957092614205065, 0.992533124265062  
"14831", "DPM3", 294.651021853076, -0.0123354353232586, 0.229443103577962, -0.0537625020360097, 0.957124385329705, 0.992533124265062  
"14832", "AC231981.1", 5.5509178519367, 0.0357880395962482, 0.657645513347139, 0.0544184349621761, 0.956601791640573, 0.992533124265062  
"14833", "CYTOR", 536.611447514875, -0.014988768007004, 0.278461943459544,

-0.0538269891418092,0.957073006459441,0.992533124265062  
"14834","SPOPL",112.924961615433,-0.012917248142519,0.240611827459164,  
-0.0536850090825701,0.957186126596372,0.992533124265062  
"14835","CALCRL",20.2847753128015,0.0242286415948469,0.441799976946836  
,0.0548407488888629,0.956265336313271,0.992533124265062  
"14836","DOCK10",16.8235963080116,-0.0232373156242153,0.43015842428958  
9,-0.0540203662466729,0.956918938013473,0.992533124265062  
"14837","DIS3L2",60.1355808850552,0.0132503167786836,0.244211657108757  
,0.0542575114372311,0.956730000620775,0.992533124265062  
"14838","ABHD5",683.960492109659,-0.018082259940973,0.325555200920237,  
-0.0555428384798043,0.955706002431913,0.992533124265062  
"14839","MST1",5.15512612778148,0.050867366556606,0.914583350053585,0.  
0556180763116076,0.955646063979631,0.992533124265062  
"14840","CTBP1-  
AS",4.46640211244461,0.0445789970975323,0.822853594562256,0.0541760981  
444671,0.956794863628836,0.992533124265062  
"14841","SDHA",331.761767570429,0.00927287005221886,0.168581214388177,  
0.0550053580161489,0.956134195177789,0.992533124265062  
"14842","AC008608.2",21.4071597659564,0.0197086957821979,0.34971553521  
0785,0.0563563633806512,0.95505791865286,0.992533124265062  
"14843","PTPRK",56.46346597321,-0.0161857810884233,0.29008485011615,-0.  
.0557967128650204,0.955503753620113,0.992533124265062  
"14844","AL078581.2",3.1299236288856,0.0535957106547253,0.989238449546  
143,0.0541787580934756,0.956792744409034,0.992533124265062  
"14845","PDE10A",55.1864480197881,0.0217310926498707,0.382322122274273  
,0.0568397468621527,0.954672851684126,0.992533124265062  
"14846","LACTB2",82.7211921060455,-0.0147384120805157,0.27065832136955  
3,-0.0544539403257144,0.956573504402012,0.992533124265062  
"14847","TIGD5",55.9396846623881,-0.0137350482318263,0.252379010830024  
, -0.0544223078878644,0.95659870606543,0.992533124265062  
"14848","FXN",48.7197179738878,-0.0143437006216959,0.262698410754734,-  
0.0546013985409595,0.956456024548166,0.992533124265062  
"14849","RALGPS1",20.5538689241979,0.0190377143290802,0.35513902885992  
9,0.0536063704127233,0.957248780956775,0.992533124265062  
"14850","ZNF248",51.9734002534377,0.0154840008915189,0.278020058824376  
,0.0556938263986917,0.955585717690973,0.992533124265062  
"14851","PHRF1",74.4984806827052,-0.0155371844779348,0.275271367413466  
, -0.0564431550724908,0.95498877895382,0.992533124265062  
"14852","PATL1",67.8420422712253,0.0139727229487804,0.255748827380477,  
0.054634553330691,0.956429610281229,0.992533124265062  
"14853","ATL3",499.18428235715,0.00959712930450521,0.178835163540715,0.  
.0536646659107411,0.957202334734541,0.992533124265062  
"14854","APOA1-  
AS",2.45065996292439,0.0519305102561645,0.95001263779262,0.05466296782  
83296,0.956406972621051,0.992533124265062  
"14855","SLC38A2",996.478144655159,0.0174761470111055,0.31197938510272  
8,0.0560169929348087,0.95532827001183,0.992533124265062  
"14856","COQ10A",55.4074197086688,0.017914380471977,0.323630773928203,  
0.0553543788637087,0.955856140468898,0.992533124265062  
"14857","CPSF6",189.26632642082,-0.00994874083178281,0.178085332181052

, -0.0558650210544479, 0.955449336448023, 0.992533124265062  
"14858", "AL161891.1", 3.38107339509251, -0.0493111966120254, 0.8841650326  
67263, -0.055771484723014, 0.955523851469873, 0.992533124265062  
"14859", "AEN", 14.8026497802723, -0.0229899019274938, 0.416665451641061, -  
0.0551759255223748, 0.955998308361503, 0.992533124265062  
"14860", "CDC27", 232.249530850624, 0.00931960462309406, 0.164060473978369  
, 0.0568059106322151, 0.954699805539683, 0.992533124265062  
"14861", "TBX2-  
AS1", 4.53716623897651, -0.0408966647052491, 0.718756365278338, -0.0568992  
035144091, 0.954625488790268, 0.992533124265062  
"14862", "SLC35E1", 171.135826728658, -0.0111487314907139, 0.1992705639554  
23, -0.055947708830733, 0.95538346417107, 0.992533124265062  
"14863", "NDUFA3", 475.672827870734, 0.0179728216751948, 0.32206135347868,  
0.0558055832563114, 0.955496687082203, 0.992533124265062  
"14864", "AL031668.2", 5.54649834310008, 0.0428471009215517, 0.75150484893  
1444, 0.057015069140905, 0.954533191229266, 0.992533124265062  
"14865", "Z93930.2", 18.5212913446119, -0.0246905165838009, 0.443076869365  
18, -0.0557251309895196, 0.955560778970546, 0.992533124265062  
"14866", "LINC01521", 2.42535117732579, 0.0514698294766542, 0.945148993126  
086, 0.0544568420968396, 0.95657119255394, 0.992533124265062  
"14867", "LINC01315", 74.2256510091661, -0.0247380427276237, 0.45143739825  
3208, -0.0547983902604105, 0.956299082863495, 0.992533124265062  
"14868", "VRK1", 39.6742550717708, -0.0143631768522404, 0.268747056480269,  
-0.0534449643480836, 0.957377380013662, 0.99259969820491  
"14869", "ITPKB", 43.7718446475316, 0.0149422472078893, 0.281286745726156,  
0.0531210497292189, 0.957635459871264, 0.992652504448856  
"14870", "PRPF19", 122.138344904357, 0.0100247725697926, 0.188940772471092  
, 0.0530577515836419, 0.957685893361232, 0.992652504448856  
"14871", "FOXN3-  
AS1", 29.2392657329096, -0.0177203767785377, 0.333510118451545, -0.0531329  
509905477, 0.957625977430034, 0.992652504448856  
"14872", "GSS", 84.900555955519, 0.0141362718913227, 0.265259157542382, 0.0  
532923048625159, 0.957499011320918, 0.992652504448856  
"14873", "SLC25A44", 39.8052684683422, 0.0182448553008056, 0.3458577717802  
72, 0.052752480324186, 0.957929123951479, 0.992837856902579  
"14874", "RORA", 353.021508175667, -0.0147696086359088, 0.282365996204097,  
-0.052306612107901, 0.958284384831063, 0.99313928950994  
"14875", "BRD1", 164.235125863092, -0.00870770529453502, 0.166813613457524  
, -0.0522002078490571, 0.958369167321459, 0.993160384151952  
"14876", "AC025171.1", 35.2050771432972, 0.0141025026180688, 0.27091295143  
3207, 0.0520554759138039, 0.958484489907746, 0.99321312260876  
"14877", "WRAP73", 76.532612050103, 0.0120165839244003, 0.231981273236144,  
0.051799801582122, 0.958688213655321, 0.993223927246238  
"14878", "AC242426.2", 19.4501453811786, -0.0210022899474502, 0.4048359096  
11581, -0.0518785252217394, 0.958625485619855, 0.993223927246238  
"14879", "ERAP2", 222.324725947256, 0.0487985390542339, 0.941562490169313,  
0.051827191040139, 0.958666389344503, 0.993223927246238  
"14880", "PLEKHM2", 273.971691329085, -0.0125712036714175, 0.2437485389317  
83, -0.0515744780523005, 0.958867755831435, 0.993276423368159  
"14881", "AC091057.3", 3.993919722985, -0.0475388294363988, 0.920483883256

237,-0.0516454772333752,0.958811182075871,0.993276423368159  
"14882","TNFRSF1B",117.408534289067,0.0107148465080329,0.2111512628594  
91,0.05074488479457,0.95952880980571,0.993341104741869  
"14883","MAP3K6",73.9293366829782,-0.01523210639655,0.298254874864845,  
-0.0510707709419752,0.959269126997259,0.993341104741869  
"14884","TMEM177",20.4136047087559,-0.0206601438448325,0.4081774632887  
79,-0.0506155917535695,0.959631838328187,0.993341104741869  
"14885","ESPNL",5.29296656601488,-0.0358798045155639,0.706725472587881  
,-0.0507690834804349,0.959509526902868,0.993341104741869  
"14886","CENPU",4.72766091443889,0.0429808742603652,0.844030119955844,  
0.0509233891589245,0.95938656783274,0.993341104741869  
"14887","CSGALNACT2",160.965565869869,-0.00944804602769264,0.185682524  
49772,-0.0508827960695281,0.959418914497761,0.993341104741869  
"14888","TCHP",65.2766150154989,-0.0140385229963271,0.27617267683854,-  
0.0508324109286689,0.959459064066806,0.993341104741869  
"14889","METTL21C",3.17084314367169,-0.0471814508706172,0.932318872381  
872,-0.0506065599102149,0.959639035472975,0.993341104741869  
"14890","PAQR5",2.76413133724806,0.0521201835976056,1.02627407078555,0  
.0507858330257832,0.959496179916932,0.993341104741869  
"14891","ANTKMT",208.022749209473,0.0145734907236756,0.286955547981059  
,0.0507865794064994,0.959495585158789,0.993341104741869  
"14892","METTL4",51.5140390177685,0.0124796707499029,0.246222622403195  
,0.0506845009938494,0.959576927189739,0.993341104741869  
"14893","AC012358.3",14.0511333017516,-0.0205108310093344,0.4067341026  
51081,-0.0504281073941069,0.959781238413387,0.993354893926572  
"14894","SHC4",3.79511973183302,0.0383045370090369,0.759290393160922,0  
.0504478093678695,0.95976553849561,0.993354893926572  
"14895","SPATS2",149.364596304145,0.00895410843746285,0.17831755154278  
7,0.0502143976293571,0.959951538379084,0.993464448748814  
"14896","LINC01140",327.955610333737,-0.014975545592971,0.306617268786  
635,-0.0488411681841444,0.961045873839394,0.993541686667471  
"14897","PHGDH",312.168941675701,-0.0141498366175984,0.28979721131618,  
-0.0488266831600405,0.961057417443961,0.993541686667471  
"14898","RTKN",36.9365692225175,-0.0147763974601939,0.300146362421662,  
-0.049230639815102,0.960735493822009,0.993541686667471  
"14899","NOP58",199.6995043972,0.00855743336600602,0.171230306365107,0  
.0499761610410213,0.960141385310822,0.993541686667471  
"14900","IL20RB",12.6254060652617,-0.0271473761719756,0.55121914087737  
6,-0.0492496979128213,0.960720306083297,0.993541686667471  
"14901","ARL10",48.335655984251,0.0145569815737693,0.29463155284049,0.  
049407408790498,0.960594624013594,0.993541686667471  
"14902","RIPK1",96.0367309394415,-0.0116961164701337,0.235582390651651  
,-0.0496476686469679,0.960403159357271,0.993541686667471  
"14903","SLC17A5",158.559144048527,-0.0103025367772845,0.2095554583905  
74,-0.0491637719981616,0.960788782093178,0.993541686667471  
"14904","SEPTIN7-  
AS1",3.05992158029639,0.0425072965698182,0.868957839839464,0.048917559  
1967399,0.960984995398478,0.993541686667471  
"14905","HDHD3",37.0753792492177,0.0158326173712305,0.322933565906793,  
0.0490274751302879,0.960897400275181,0.993541686667471

"14906", "AP002884.3", 5.34457284727476, -0.0455518194291501, 0.924299262833124, -0.049282544367207, 0.960694130190169, 0.993541686667471  
"14907", "MFSD5", 90.1552664194708, 0.0115056213653182, 0.234175129060047, 0.0491325505466804, 0.960813663138523, 0.993541686667471  
"14908", "SYNE3", 459.376896516111, -0.0138040479339264, 0.279266334440842, -0.0494296885500553, 0.960576869031214, 0.993541686667471  
"14909", "OPA3", 28.86121315992, 0.0188057161044724, 0.379702886903983, 0.0495274509441058, 0.960498961348818, 0.993541686667471  
"14910", "NTN5", 4.57485432320432, 0.0369122601907762, 0.754449584121954, 0.0489260793134846, 0.960978205459067, 0.993541686667471  
"14911", "BFSP1", 4.65818019009506, 0.0361803051356355, 0.727655430267511, 0.0497217551476725, 0.960344119798858, 0.993541686667471  
"14912", "CD300A", 3.45415271205876, -0.0383591539496659, 0.787856365269609, -0.048688004109149, 0.961167935872835, 0.993589306027344  
"14913", "GTF3C5", 85.7611881862028, 0.0100785278816543, 0.208943894990381, 0.0482355700419881, 0.961528502374747, 0.993811377275774  
"14914", "TRIM13", 128.237280000293, -0.00938764380600005, 0.195190167353845, -0.0480948601728587, 0.961640642455105, 0.993811377275774  
"14915", "AC105429.1", 12.75467846914, 0.034975464652936, 0.726677898663982, 0.0481306294263791, 0.961612135733269, 0.993811377275774  
"14916", "IGLC1", 55.3357375375442, -0.0765681273775875, 1.58827981670454, -0.0482082102739652, 0.961550306944859, 0.993811377275774  
"14917", "MTRES1", 103.859608562337, -0.0123700818876727, 0.260183585200053, -0.0475436675921021, 0.962079927959405, 0.994028679959115  
"14918", "MAMDC4", 4.45272552901487, -0.0367975610714155, 0.774205632370084, -0.0475294411883401, 0.96209126616947, 0.994028679959115  
"14919", "EPC1", 486.681769720765, 0.00814587183333919, 0.17146539945948, 0.0475073796755373, 0.962108848847875, 0.994028679959115  
"14920", "NDUFA6-DT", 14.232519174143, -0.0219592659711955, 0.461443096348929, -0.0475882425047499, 0.96204440253604, 0.994028679959115  
"14921", "IRF2", 237.043885135546, 0.00799816393331979, 0.169578847853485, 0.0471648677565622, 0.962381827814039, 0.994040384107754  
"14922", "AL359643.3", 9.40291569069835, -0.0226755059804213, 0.482378522322901, -0.0470077023148274, 0.962507088757206, 0.994040384107754  
"14923", "AC105219.1", 2.88030980837094, 0.0411672710814737, 0.873535236785111, 0.0471272014543826, 0.96241184779303, 0.994040384107754  
"14924", "SAV1", 745.703049863567, -0.0094509013534097, 0.200876677141802, -0.0470482760262813, 0.962474751398209, 0.994040384107754  
"14925", "ENTPD5", 59.2247886740917, 0.012861088339048, 0.271800740957246, 0.0473180768152176, 0.962259721004079, 0.994040384107754  
"14926", "NFS1", 47.0969877909054, -0.0118438126987304, 0.250133059853509, -0.0473500492324636, 0.96223423926807, 0.994040384107754  
"14927", "MFSD14A", 153.545388934444, 0.00845419781076592, 0.183758471954344, 0.0460071185880693, 0.963304576106481, 0.994139471462062  
"14928", "SATB2", 17.8739010637267, 0.019047508186612, 0.410611123683484, 0.0463881933244814, 0.963000846745772, 0.994139471462062  
"14929", "NUB1", 323.385984464642, -0.00743497103579531, 0.160756024969071, -0.0462500303626305, 0.963110966647509, 0.994139471462062  
"14930", "UBE2V2", 326.125906832685, -0.0104133286503091, 0.22344004479789

8,-0.04660457645239,0.962828384514166,0.994139471462062  
"14931","DENND1A",53.9323377219175,0.0120221560557885,0.25951711295710  
7,0.0463250994078974,0.963051134346164,0.994139471462062  
"14932","CCAR1",258.910454500313,0.007782983873814,0.168704311342408,0  
.0461338765552789,0.963203545157094,0.994139471462062  
"14933","ARFGAP2",210.501609061655,-0.0088107786959728,0.1906387527730  
42,-0.0462171440371421,0.963137178109816,0.994139471462062  
"14934","LINC02334",3.43181755874366,0.0393583396041868,0.842009442824  
32,0.046743347048661,0.962717782134989,0.994139471462062  
"14935","PELP1",85.2520539811174,0.0125993417238425,0.272322235807988,  
0.0462662980364415,0.963098000801432,0.994139471462062  
"14936","SPAG5",7.15225918195509,-0.0258891988206421,0.560533560986113  
, -0.0461867060646588,0.963161438191297,0.994139471462062  
"14937","RPN2",742.227552413082,-0.00892392722070779,0.194010014649719  
, -0.0459972503832843,0.963312441467974,0.994139471462062  
"14938","TXLNA",257.381652516563,0.00923963339780212,0.212250253953818  
, 0.04353178960065,0.965277624100114,0.99457350274515  
"14939","RNF220",112.94616406401,-0.0101508799734638,0.247849762228175  
, -0.0409557785418357,0.967331149870768,0.99457350274515  
"14940","GBP2",445.998310076809,-0.00814252021258287,0.200033309299809  
, -0.0407058216508277,0.967530420437816,0.99457350274515  
"14941","AC245297.2",8.4686627251181,-0.0205506867514259,0.50684099794  
1449,-0.0405466148849307,0.9676573442717,0.99457350274515  
"14942","TDRKH",4.39360689352926,0.0325848976878377,0.748110112743239,  
0.0435562855424484,0.965258097686981,0.99457350274515  
"14943","THEM4",72.3526544986274,-0.00929228066769787,0.22703981285458  
8,-0.0409279788899812,0.967353312201328,0.99457350274515  
"14944","RABGAP1L",277.950271697256,-0.00950798833364326,0.22143414864  
9243,-0.0429382206477292,0.965750781161632,0.99457350274515  
"14945","MIA3",328.402477102423,-0.00706647348980254,0.159436537815088  
, -0.0443215437730975,0.964648099099133,0.99457350274515  
"14946","TTC13",19.6852121375165,0.0152536748967189,0.346919332890612,  
0.043968938743257,0.964929163204386,0.99457350274515  
"14947","CRIPT",228.845574412237,-0.00775647190590194,0.19114804409559  
9,-0.0405783482776454,0.967632045508372,0.99457350274515  
"14948","IDH1-  
AS1",4.09757279872539,-0.0340329439921088,0.809535387377716,-0.0420400  
942599309,0.966466735757677,0.99457350274515  
"14949","GALNT15",1065.2408435893,-0.0259113385531456,0.60204729286119  
1,-0.0430387095173266,0.965670676695141,0.99457350274515  
"14950","AC097359.2",4.22151371903665,0.0310513304396969,0.72262166351  
6033,0.042970384099214,0.96572514210414,0.99457350274515  
"14951","ZNF620",6.84305031299934,-0.0248086831048253,0.60839071568831  
2,-0.0407775504541643,0.967473236612067,0.99457350274515  
"14952","C3orf62",27.8455243214198,-0.0137392676467388,0.3311806625384  
02,-0.0414857182222879,0.966908678260365,0.99457350274515  
"14953","USP4",109.652389623191,-0.00890817843391114,0.215751013883369  
, -0.0412891613975299,0.967065373655071,0.99457350274515  
"14954","FOX P1",949.951622665589,-0.013510184965082,0.300820733624629,  
-0.0449110830968861,0.96417818272572,0.99457350274515



"14955", "GMPS", 157.609728780165, -0.00799521147399563, 0.184289943710674, -0.0433838727876965, 0.965395533248149, 0.99457350274515  
"14956", "GOLIM4", 715.313845920168, 0.0110302644860206, 0.245641118405553, 0.0449039825157026, 0.964183842459986, 0.99457350274515  
"14957", "C1QTNF7", 250.8511834851, -0.0270551678358199, 0.657419447243879, -0.0411535861149897, 0.967173455214552, 0.99457350274515  
"14958", "TRIP13", 3.52042068542053, -0.0339584675658704, 0.817111494752947, -0.041559160266296, 0.966850130480605, 0.99457350274515  
"14959", "SLF1", 38.5341590363947, 0.0112546947348171, 0.274236877296889, 0.0410400484637695, 0.967263968684908, 0.99457350274515  
"14960", "SMAD5-AS1", 12.4586744365097, 0.0231166739845448, 0.536581810592458, 0.0430813596886949, 0.965636678315837, 0.99457350274515  
"14961", "RNF145", 249.575428782788, 0.0103894525876034, 0.237615623212877, 0.0437237772799798, 0.965124585809752, 0.99457350274515  
"14962", "SERPINB9P1", 4.96877540054193, 0.0499546393150028, 1.17494298050803, 0.0425166498661943, 0.966086839077636, 0.99457350274515  
"14963", "SMIM8", 121.957403791863, 0.0107868367636089, 0.252069811554723, 0.0427930528335685, 0.965866501953995, 0.99457350274515  
"14964", "STX11", 19.7272474313136, -0.0194803636576824, 0.452450607924757, -0.0430552270601038, 0.965657509807824, 0.99457350274515  
"14965", "AL354892.3", 3.13302428359104, 0.0405880664434541, 0.90866354073675, 0.0446678716860864, 0.964372042806286, 0.99457350274515  
"14966", "MRPL32", 254.783458665064, -0.0110250423151731, 0.250704838131371, -0.0439761848927541, 0.964923387200478, 0.99457350274515  
"14967", "ZNF138", 75.079158092673, -0.0101892456687702, 0.234798453243153, -0.0433957103551208, 0.965386097122619, 0.99457350274515  
"14968", "VPS13A", 83.4192360104238, 0.0135572186850526, 0.306818188280351, 0.0441864895984095, 0.9647557512743, 0.99457350274515  
"14969", "ZNF883", 3.25407232942946, 0.038347201891088, 0.946089029230655, 0.0405323396702648, 0.967668724889507, 0.99457350274515  
"14970", "AL445222.1", 4.52778331861805, 0.030396712906338, 0.732503172543605, 0.0414970392562068, 0.96689965315405, 0.99457350274515  
"14971", "UNC5B", 8.92071831539149, 0.0233694806369846, 0.551710241697812, 0.042358250528517, 0.966213109709532, 0.99457350274515  
"14972", "EXOSC1", 135.115960938993, 0.0117910775368634, 0.274844741240357, 0.0429008664442734, 0.965780558065388, 0.99457350274515  
"14973", "TPBGL", 2.69634893073508, -0.0417887597091073, 0.964114808134392, -0.0433441736985355, 0.965427178770744, 0.99457350274515  
"14974", "AQP11", 5.81269281048952, 0.0252719376518173, 0.614039838751339, 0.0411568371576806, 0.967170863453611, 0.99457350274515  
"14975", "FOXRED1", 62.848153389777, -0.0115854480829407, 0.257330120268967, -0.0450217334481923, 0.964089985730086, 0.99457350274515  
"14976", "LTA4H", 137.05352786407, 0.00901496888963405, 0.214351015597064, 0.0420570383794231, 0.966453228252806, 0.99457350274515  
"14977", "ACADS", 168.279037889525, -0.0100835321089908, 0.245258832331057, -0.0411138388499695, 0.967205142125455, 0.99457350274515  
"14978", "KCNRG", 4.14963093888992, 0.0327114911407167, 0.752281226856766, 0.0434830618828469, 0.965316466414194, 0.99457350274515  
"14979", "CLYBL", 25.9112048760133, -0.0145618928240337, 0.324500332157692

, -0.0448748163898867, 0.964207090226867, 0.99457350274515  
"14980", "GTF2A2", 539.290347153051, -0.0115950954872549, 0.28237389657022  
5, -0.0410629156168169, 0.967245738703819, 0.99457350274515  
"14981", "SPNS1", 198.316548612519, 0.00892434779698693, 0.204066838644823  
, 0.0437324744003101, 0.965117653143032, 0.99457350274515  
"14982", "ORC6", 5.82536259713694, 0.0249817276682833, 0.603492482303999, 0  
.0413952590973605, 0.966980792251725, 0.99457350274515  
"14983", "MLYCD", 78.7283150023908, -0.00993979171350038, 0.23548732810192  
1, -0.0422094547236035, 0.966331725499444, 0.99457350274515  
"14984", "AC055811.3", 2.92698988155773, -0.0366593102572562, 0.9028881622  
48423, -0.0406022714551547, 0.967612973292302, 0.99457350274515  
"14985", "SRSF2", 882.422605210511, -0.00764675465188518, 0.18861549747839  
, -0.0405414971416189, 0.967661424285291, 0.99457350274515  
"14986", "TYMS", 9.27587764492217, 0.0247242111883659, 0.567855551145617, 0  
.0435396134430422, 0.965271387490167, 0.99457350274515  
"14987", "TWSG1", 186.714554357165, -0.00893695415831177, 0.20422590886595  
4, -0.0437601389947915, 0.965095601101244, 0.99457350274515  
"14988", "TIMM44", 139.232809753643, 0.0110103226499415, 0.255043256698697  
, 0.0431704127074762, 0.965565690331005, 0.99457350274515  
"14989", "TMEM38A", 10.9648319978602, -0.0198207782932999, 0.4694317993272  
12, -0.0422229135770242, 0.966320996453041, 0.99457350274515  
"14990", "XRCC1", 78.2703919898286, 0.0100395481529295, 0.233170093871688,  
0.0430567573492259, 0.965656289944986, 0.99457350274515  
"14991", "MOCS3", 21.2843106135768, 0.0153777371872249, 0.340337734270777,  
0.045183756130286, 0.963960841756564, 0.99457350274515  
"14992", "IL10RB", 347.502997230589, 0.00719795411337245, 0.17081427457449  
5, 0.0421390667220454, 0.966387837075006, 0.99457350274515  
"14993", "TEF", 68.0273156724561, 0.0354115480810451, 0.832957961378747, 0.  
0425130075261307, 0.96608974261926, 0.99457350274515  
"14994", "SLC9A7", 6.84632434739999, 0.0299972992308685, 0.731331794537207  
, 0.0410173596374967, 0.967282056518566, 0.99457350274515  
"14995", "ZC4H2", 26.9792895850538, -0.0139153438142732, 0.332006926437799  
, -0.0419128117704504, 0.966568203057598, 0.99457350274515  
"14996", "GLA", 158.182939687375, 0.00992056707913709, 0.219582094523222, 0  
.0451793079972099, 0.963964387232607, 0.99457350274515  
"14997", "TMEM164", 19.1667534203459, -0.0155180900448125, 0.3641985053193  
54, -0.0426088789991194, 0.96601331750205, 0.99457350274515  
"14998", "AC240274.1", 76.4899415396209, 0.0147709311991336, 0.32850642215  
5577, 0.0449639039085156, 0.96413608034742, 0.99457350274515  
"14999", "NBPF26", 72.2271885620353, -0.0179670741387476, 0.45427691966992  
1, -0.0395509288735218, 0.968451149885469, 0.994614925253725  
"15000", "AC092902.4", 8.19600491229716, 0.0224071554053155, 0.56461314834  
6912, 0.0396858547678524, 0.96834357905325, 0.994614925253725  
"15001", "MCCC1", 40.90691244759, -0.0100476385785333, 0.25284604803594, -0  
.0397381673812243, 0.968301872526189, 0.994614925253725  
"15002", "AC008443.5", 14.1031759172604, 0.0190833805613305, 0.47381534462  
2716, 0.0402759867908583, 0.967873098006253, 0.994614925253725  
"15003", "CCZ1B", 57.9158863436464, -0.0197919176412379, 0.497414422349446  
, -0.0397895934495715, 0.968260872886675, 0.994614925253725  
"15004", "COL14A1", 2452.61799135167, -0.0115046353655726, 0.2881734865144

8,-0.0399226018490585,0.96815483179539,0.994614925253725  
"15005","MINPP1",75.7515490648364,-0.0107719715138629,0.26859392507693  
5,-0.0401050452305554,0.968009379527151,0.994614925253725  
"15006","CRACR2A",25.2844645669673,-0.0164989565955713,0.4170560952304  
98,-0.0395605214364573,0.968443502113009,0.994614925253725  
"15007","CERS3-  
AS1",2.52135678131381,0.0399510726535332,1.00635353315849,0.0396988447  
27205,0.968333222726557,0.994614925253725  
"15008","AC005726.1",5.79340153064919,-0.0255453867943335,0.6342942271  
25286,-0.0402737179401883,0.967874906819573,0.994614925253725  
"15009","EPOP",3.72404842157289,0.0317173631428404,0.802755662516279,0  
.0395106065566959,0.968483297311607,0.994614925253725  
"15010","RAB36",12.294951434012,0.0202360040127701,0.506141562490495,0  
.0399809174200156,0.968108339820408,0.994614925253725  
"15011","ELAVL1",225.016138479656,-0.00690721315528553,0.1756433962998  
52,-0.0393252083528024,0.968631108798632,0.994700455807802  
"15012","MROH6",19.5161052131811,0.018300149387449,0.466880475858131,0  
.0391966473942033,0.968733606576015,0.99473944480211  
"15013","F3",697.030519300259,-0.0142578807398336,0.370618978909623,-0  
.0384704549717903,0.969312587556089,0.994803830704201  
"15014","TATDN3",64.9617767177068,0.0108898586682963,0.280354440907057  
,0.0388431823411226,0.969015416266303,0.994803830704201  
"15015","ANAPC10",116.16200084924,-0.0103027003970028,0.26532419388808  
3,-0.0388306103790469,0.969025439678712,0.994803830704201  
"15016","CN0T8",130.132686272552,-0.00776977733196212,0.20133454155978  
9,-0.0385913776730398,0.969216176793567,0.994803830704201  
"15017","HAUS6",60.6925867792099,-0.00904496633086482,0.23503642371492  
8,-0.0384832537353244,0.969302383176694,0.994803830704201  
"15018","AL354920.1",6.14123392801118,0.0240823134240791,0.61919104448  
2869,0.0388931875527883,0.96897554800654,0.994803830704201  
"15019","RAB18",310.465318762318,-0.00652162352468608,0.16869500384382  
5,-0.0386592570976417,0.969162057234647,0.994803830704201  
"15020","MVD",63.5278713163494,-0.00925931047408748,0.239459462737266,  
-0.0386675488545915,0.969155446312839,0.994803830704201  
"15021","TMEM204",133.396032434706,-0.0104683505381499,0.2734747725164  
23,-0.0382790355462177,0.969465205744396,0.994894224522327  
"15022","CLK2",46.0136899307604,-0.0113548508173787,0.29753271894763,-  
0.0381633685785572,0.969557427246064,0.994922629543208  
"15023","CBR3-  
AS1",26.1031331313089,-0.0121488078049798,0.319119471849569,-0.0380697  
791161633,0.969632046607206,0.994932969343678  
"15024","LRRC29",13.6857457319423,-0.0161212099826503,0.42571941386193  
1,-0.0378681578939661,0.969792801150187,0.99503168461995  
"15025","SAMSN1",23.7439786368846,-0.0187935364786832,0.49832352711343  
9,-0.0377135243594569,0.969916092789057,0.995091951437159  
"15026","DNAJC8",797.95102778793,-0.00773992138975332,0.21168400420384  
9,-0.0365635628391641,0.970832996733337,0.995092173552769  
"15027","TRMT13",85.075495346381,0.0105391891309404,0.283440432777553,  
0.0371830829767737,0.970339027113404,0.995092173552769  
"15028","RNPEP",156.349999892633,0.00703440865831896,0.195329293710394

,0.0360130757895872,0.971271932745699,0.995092173552769  
"15029","AC092620.1",4.99693186984136,-0.024172610607897,0.66999281965  
3012,-0.0360789099507305,0.971219438799089,0.995092173552769  
"15030","SCD5",53.0489597650508,-0.0131444459213512,0.355407772890048,  
-0.0369841261896591,0.970497662547113,0.995092173552769  
"15031","AC012640.2",5.05789133106189,0.024971542192064,0.689270828716  
845,0.0362289264998366,0.971099821112842,0.995092173552769  
"15032","TBCA",1019.5710306849,0.00785802035913439,0.21402818384331,0.  
0367148859464567,0.970712339376831,0.995092173552769  
"15033","AC018645.3",15.9604135808955,-0.0159002806936985,0.4351121955  
2065,-0.0365429442276891,0.970849437018164,0.995092173552769  
"15034","BAZ1B",282.576598843242,0.00792753635364189,0.219086330896999  
,0.0361845320115792,0.971135219579591,0.995092173552769  
"15035","CN0T4",281.985007633559,-0.00566550543917959,0.15642886191336  
6,-0.0362177757344887,0.971108712301237,0.995092173552769  
"15036","NSMCE2",137.643048441416,-0.0086532030774904,0.23709441486682  
3,-0.0364968659525402,0.970886177653763,0.995092173552769  
"15037","CD274",2.66210873752717,-0.0363315461042953,0.967019205378447  
, -0.0375706562002321,0.970030004356656,0.995092173552769  
"15038","ATG13",103.621254114342,0.00722964531561714,0.197540950281346  
,0.0365982106764211,0.970805370249457,0.995092173552769  
"15039","RAD51AP1",6.21582546650894,0.022854669567934,0.63169821153283  
4,0.0361797281529047,0.971139049996151,0.995092173552769  
"15040","PIBF1",135.296025481697,0.00706024721460712,0.193704978810687  
,0.036448455057561,0.970924778276563,0.995092173552769  
"15041","PRMT5",80.0748904793038,-0.0079966184874507,0.21328977167935,  
-0.0374918048084952,0.970092874369969,0.995092173552769  
"15042","WDHD1",10.64665866242,0.0173370866904306,0.473529448642135,0.  
0366124783583058,0.970793993910786,0.995092173552769  
"15043","LINS1",50.3387598843175,-0.0101322689974924,0.28067945056706,  
-0.0360990766407089,0.971203358583484,0.995092173552769  
"15044","ZFP90",122.40067766589,-0.00699929169462048,0.188449410898352  
, -0.0371414888550427,0.970372191512437,0.995092173552769  
"15045","KLF8",60.2726951890117,-0.0109578973676924,0.303812082881369,  
-0.0360680104088264,0.971228129718731,0.995092173552769  
"15046","RAP2C-  
AS1",42.8945975072098,0.0094578365493667,0.253837625529957,0.037259395  
7638109,0.970278180482542,0.995092173552769  
"15047","BROX",166.896535477439,-0.00743971789684415,0.207642088149732  
, -0.0358295274485937,0.971418288678017,0.995109843166642  
"15048","MAP7D2",11.0733417433049,-0.0200884203611165,0.56022348846002  
4,-0.0358578688236309,0.971395690054132,0.995109843166642  
"15049","ANKRD23",6.51337523961669,0.0208861773583236,0.58574472454989  
1,0.0356574741230036,0.971555479704494,0.995184246105706  
"15050","KDM7A",157.763478409385,-0.0131420738309053,0.369449751105944  
, -0.0355720197173354,0.971623619227269,0.995187912982615  
"15051","SELENOF",1000.66928268815,0.00708050432336682,0.2035974523057  
31,0.0347769790003779,0.972257577621467,0.995224448050132  
"15052","THP0",5.48724824439474,-0.0286859134865981,0.824733120525479,  
-0.0347820558829029,0.972253529304476,0.995224448050132

"15053", "AT0X1", 534.522334398124, -0.00949471719875791, 0.268001026826467, -0.0354279135090994, 0.971738526916948, 0.995224448050132  
"15054", "AL365203.2", 4.21434309590324, 0.0279555073884736, 0.797549575988312, 0.0350517487942133, 0.972038476630042, 0.995224448050132  
"15055", "IKZF5", 59.934311532175, 0.0101975643722795, 0.292001173328299, 0.0349230253291287, 0.972141120252231, 0.995224448050132  
"15056", "IFT81", 62.1763025832088, -0.0088270460203344, 0.251992045554585, -0.0350290660997168, 0.972056563694447, 0.995224448050132  
"15057", "TMEM8A", 69.2447412128672, -0.00827008953508782, 0.238210146177067, -0.0347176208394602, 0.972304909999026, 0.995224448050132  
"15058", "AC092718.4", 4.98236230280437, -0.0264469504153346, 0.751268924164903, -0.0352030405686386, 0.971917837712355, 0.995224448050132  
"15059", "UNC13D", 6.57689201395889, 0.0194985955404487, 0.555786396830285, 0.035082894528638, 0.97201364120438, 0.995224448050132  
"15060", "ZNF726", 5.3686483082076, -0.022470065011905, 0.64024981003317, -0.0350957777101736, 0.972003368239039, 0.995224448050132  
"15061", "GPR89B", 22.6190389979064, -0.0119105952575592, 0.346323157921836, -0.0343915645983091, 0.972564909969732, 0.995424479595208  
"15062", "URB2", 10.0747001426633, -0.0160886501550465, 0.471864270432964, -0.0340959279249608, 0.972800655643902, 0.995475639396884  
"15063", "TRIQK", 175.402718547073, 0.00836413993132789, 0.244762934896472, 0.0341724123175173, 0.972739665469399, 0.995475639396884  
"15064", "AP005482.3", 3.77861713931071, -0.0258978744362291, 0.759782003242897, -0.0340859277078055, 0.972808630027548, 0.995475639396884  
"15065", "SC0C-AS1", 11.3708432858499, -0.0186529928262671, 0.549654610640184, -0.0339358434645748, 0.972928310688184, 0.995532021855849  
"15066", "FGFR10P", 37.0542596374305, 0.00895907550642371, 0.266313804691635, 0.0336410480740847, 0.973163389149966, 0.995645191105522  
"15067", "EDNRB", 6.96682252603234, -0.0266839872522039, 0.793336255606645, -0.0336351541526352, 0.973168089159059, 0.995645191105522  
"15068", "ADCY7", 97.2342380350049, 0.0074136283910322, 0.225247082807993, 0.032913315895646, 0.973743714000363, 0.996128993958032  
"15069", "CEBPA-DT", 10.0285359437807, 0.0161479938173506, 0.491117715120958, 0.0328800882561801, 0.973770211479311, 0.996128993958032  
"15070", "NSF", 100.909537772883, -0.00671237648979732, 0.204809821762781, -0.0327737040734885, 0.973855048053674, 0.996149672577796  
"15071", "AL138995.1", 8.93925268713988, -0.0176557300694138, 0.540716274511098, -0.0326524850493498, 0.973951715103655, 0.996182448963098  
"15072", "C1orf159", 17.5155351756909, -0.0123944000274869, 0.420164290751869, -0.0294989372021777, 0.976466666563743, 0.996301760659144  
"15073", "LINC02606", 8.04379091835172, 0.0192136676656377, 0.644792340313444, 0.0297982256679687, 0.976227973851638, 0.996301760659144  
"15074", "PIGK", 188.466117950809, 0.00693842769287308, 0.23815914400505, 0.0291335767176169, 0.976758056808332, 0.996301760659144  
"15075", "GON4L", 218.006541869089, 0.00590790388904577, 0.202010984114906, 0.0292454586810254, 0.976668825938838, 0.996301760659144  
"15076", "C1orf131", 137.196869490532, -0.00552053755525016, 0.191293744595995, -0.0288589549381728, 0.97697708119013, 0.996301760659144

"15077", "DNAJC27", 49.4334494504189, 0.00871424183165635, 0.2759041703110  
87, 0.0315843063257467, 0.974803558884251, 0.996301760659144  
"15078", "AC093690.1", 11.9643844896242, -0.0187681142433119, 0.6320123817  
74694, -0.0296958015135889, 0.976309660353467, 0.996301760659144  
"15079", "AC110769.2", 6.44514567878977, 0.0200028192036082, 0.64960785215  
7236, 0.0307921450413234, 0.975435304800181, 0.996301760659144  
"15080", "GLI2", 68.3561352955548, -0.00833716451992651, 0.27516544337692,  
-0.030298733800328, 0.975828806391493, 0.996301760659144  
"15081", "PRPF40A", 505.212511365145, 0.00464581837905455, 0.1617326589643  
66, 0.0287252952421819, 0.977083682003409, 0.996301760659144  
"15082", "CNPPD1", 163.473127655987, -0.00612030276481918, 0.2137465447243  
83, -0.0286334582517395, 0.977156927191646, 0.996301760659144  
"15083", "CCDC174", 173.19355586018, 0.00577756365128694, 0.20683214985470  
4, 0.0279335860278277, 0.977715121111854, 0.996301760659144  
"15084", "ATRIP", 25.4075275787741, 0.0100317129185836, 0.331056752024377,  
0.0303020943002695, 0.975826126331058, 0.996301760659144  
"15085", "CNTN3", 79.7528569612742, 0.0243024292789298, 0.74988337896707, 0  
.0324082783544359, 0.974146460784977, 0.996301760659144  
"15086", "MBNL1", 900.873111486956, -0.00704548589113771, 0.22492006722022  
2, -0.0313243988329391, 0.97501083249825, 0.996301760659144  
"15087", "TNK2", 16.0589455473579, 0.0137636753052082, 0.482239239635005, 0  
.0285411766069174, 0.977230527210878, 0.996301760659144  
"15088", "LINC02104", 12.4967985042383, -0.0158921590331796, 0.54137085636  
4338, -0.0293554018402577, 0.976581141636798, 0.996301760659144  
"15089", "SREK1IP1", 318.08988958416, 0.0061777632486034, 0.20618603632744  
4, 0.0299620835563884, 0.976097292523162, 0.996301760659144  
"15090", "CWC27", 182.31114969788, -0.00546113365431586, 0.180204259378423  
, -0.0303052418025683, 0.975823616140402, 0.996301760659144  
"15091", "OCLN", 23.5087749226394, 0.0202464047984533, 0.665219567737572, 0  
.0304356723409562, 0.975719595611133, 0.996301760659144  
"15092", "TRIM39", 27.3067339336196, -0.00854404152977452, 0.3037865893948  
49, -0.0281251438610061, 0.977562340102124, 0.996301760659144  
"15093", "AKAP7", 42.2258657722327, 0.00976307483177141, 0.309289380234087  
, 0.031566149553477, 0.974818038672581, 0.996301760659144  
"15094", "SND1-  
IT1", 22.2721082350971, 0.0174578258143817, 0.545496840129114, 0.032003532  
4315528, 0.974469233868874, 0.996301760659144  
"15095", "TLN1", 836.570385565186, -0.00537527843173983, 0.185172842180853  
, -0.0290284383413523, 0.97684190963059, 0.996301760659144  
"15096", "C9orf64", 80.4670498223183, -0.00665274792862768, 0.230204243697  
933, -0.0288993279261924, 0.976944881636409, 0.996301760659144  
"15097", "TRIM32", 34.7954399134415, 0.00992938194115399, 0.34840177861525  
2, 0.0284998026721306, 0.977263525411262, 0.996301760659144  
"15098", "EXOSC2", 46.1700744663781, 0.00736446513259481, 0.26334470446680  
4, 0.027965115712145, 0.977689973887531, 0.996301760659144  
"15099", "DCLRE1C", 89.2238055850365, 0.00711555722420252, 0.2326523539171  
17, 0.0305845056127713, 0.975600899099632, 0.996301760659144  
"15100", "PCGF6", 51.7828990694285, -0.00841686731058636, 0.28269780860664  
1, -0.0297733730306272, 0.976247794592898, 0.996301760659144  
"15101", "ADD3-

AS1",18.9452617664978,0.0141913748309736,0.457028779116051,0.031051381  
1808994,0.975228563149596,0.996301760659144  
"15102","CASP7",146.837225256173,0.0080576745591429,0.277816250475191,  
0.0290036113631245,0.976861710356044,0.996301760659144  
"15103","THAP12",277.255199627364,0.00651685018572809,0.21250553307078  
,0.0306667317860259,0.975535322865638,0.996301760659144  
"15104","KANSL2",54.1239645119016,0.00654420982708159,0.22454036948720  
2,0.0291449143066213,0.97674901456079,0.996301760659144  
"15105","AC008147.2",33.0774319823161,-0.0148734857343317,0.5204379034  
4822,-0.0285787903528658,0.977200528020969,0.996301760659144  
"15106","TSPAN8",105.768275801652,-0.020524638380067,0.731659123043745  
, -0.0280521867815756,0.977620528470333,0.996301760659144  
"15107","TAOK3",279.766748078872,-0.00631337862952586,0.22048514232466  
, -0.0286340320393541,0.977156469563009,0.996301760659144  
"15108","CCDC92",130.709888302487,-0.00678044332618511,0.2150955544034  
47,-0.0315229356784719,0.974852501205878,0.996301760659144  
"15109","CDK8",30.7575675321265,-0.00925967585574388,0.290864933447632  
, -0.0318349680244662,0.974603660309765,0.996301760659144  
"15110","RPS29",12626.9588883097,-0.00820682624597632,0.28125838095068  
8,-0.02917895715049,0.976721863848451,0.996301760659144  
"15111","JKAMP",194.582257728674,0.00787086687646395,0.272932668175291  
,0.0288381267405076,0.97699369277364,0.996301760659144  
"15112","PNMA1",183.115683256023,0.00635129502613516,0.201889599581861  
,0.0314592482192718,0.974903291256074,0.996301760659144  
"15113","IGHM",27.6656424516601,-0.0319125455350866,0.997187243041133,  
-0.0320025609611316,0.974470008593288,0.996301760659144  
"15114","AC009754.1",2.47412665598653,-0.0291265134599227,0.9958691068  
77206,-0.029247331058653,0.976667332636423,0.996301760659144  
"15115","ZFH3",444.164937871433,0.00760251675415711,0.262905903887026  
,0.0289172538225844,0.976930584815538,0.996301760659144  
"15116","PIK3R5",8.07167541045683,0.0246758886543572,0.783650749719316  
,0.0314883749721359,0.974880062977484,0.996301760659144  
"15117","RNF135",105.514987940588,-0.00527866064061477,0.1874209546707  
44,-0.028164730298638,0.977530767202238,0.996301760659144  
"15118","COA3",376.637571838923,0.00779631214744506,0.265808888931977,  
0.0293305170446734,0.976600988285079,0.996301760659144  
"15119","SRSF1",270.186794789121,0.00531101450712341,0.189232927022279  
,0.0280660167905034,0.977609498062781,0.996301760659144  
"15120","AC022211.2",2.62408893486904,-0.0279726220186225,0.9870168534  
44152,-0.028340571815986,0.97739052195449,0.996301760659144  
"15121","DNASE2",312.671418303204,0.00687399595781634,0.21711930270104  
8,0.0316599946310677,0.974743198540539,0.996301760659144  
"15122","NFI",1289.02459059143,-0.00617708885638407,0.197935618451877  
, -0.0312075658979279,0.975104006140614,0.996301760659144  
"15123","FAM32A",346.594626377343,-0.00651574736443911,0.2023592983850  
54,-0.0321989027261835,0.974313431224471,0.996301760659144  
"15124","ZNF235",8.57259761376363,-0.0164552693370761,0.53270127159049  
6,-0.0308902385157544,0.975357074745694,0.996301760659144  
"15125","PNMA8A",7.14324399424421,0.0162318529497011,0.581700615685379  
,0.0279041357564598,0.977738609872598,0.996301760659144

"15126", "ZNF600", 19.3801609545031, -0.0120708521757424, 0.42099149584299, -0.0286724370799269, 0.977125839350484, 0.996301760659144  
"15127", "GID8", 198.33215794175, 0.00435273373423409, 0.151601958274784, 0.0287115930675817, 0.977094610249513, 0.996301760659144  
"15128", "HDAC6", 58.652578852333, 0.00641610040328976, 0.230076091631326, 0.0278868628104606, 0.977752386328351, 0.996301760659144  
"15129", "NUCKS1", 2601.38400307593, 0.00432393620562091, 0.156466548081803, 0.0276348923052888, 0.977953352249919, 0.996434774876559  
"15130", "GFOD2", 59.4808478193806, -0.00621786322175228, 0.225602844725768, -0.0275611029165453, 0.978012205246989, 0.996434774876559  
"15131", "PISD", 48.5568165295336, -0.00788365741456003, 0.286915964422533, -0.0274772351215355, 0.978079096732344, 0.996437068014611  
"15132", "STARD7-AS1", 10.148689812495, 0.0146078135713775, 0.557945566409544, 0.0261814313990893, 0.979112626402976, 0.996445652799236  
"15133", "LYG2", 2.37160510582369, 0.0257540772461014, 0.993936656813966, 0.0259111856570974, 0.979328178178816, 0.996445652799236  
"15134", "KIAA1143", 182.084672511125, 0.00462182432246213, 0.173581763820813, 0.0266262090021923, 0.978757868906621, 0.996445652799236  
"15135", "AC093849.2", 32.5719244757779, 0.011620881894015, 0.446229603428848, 0.0260423822281615, 0.97922353773038, 0.996445652799236  
"15136", "FARS2", 79.0521206080999, 0.00764956260145074, 0.284932262650869, 0.0268469513781381, 0.978581804913752, 0.996445652799236  
"15137", "QS0X2", 20.9207828265785, 0.00917244563849373, 0.34348146968489, 0.0267043390926111, 0.978695552272408, 0.996445652799236  
"15138", "MICAL2", 2.72415527490812, 0.0236177536243305, 0.863336954088745, 0.0273563566490203, 0.97817550755735, 0.996445652799236  
"15139", "FAR2", 37.8102747245847, 0.0134937417043427, 0.503424158007919, 0.0268039216825397, 0.97861612529276, 0.996445652799236  
"15140", "GNPTAB", 162.559031956335, 0.0061300036274698, 0.224761624071262, 0.0272733552838462, 0.978241708364266, 0.996445652799236  
"15141", "UHL3", 150.739701659724, -0.0070841951366556, 0.2740948810917, -0.0258457768654408, 0.979380349371471, 0.996445652799236  
"15142", "RSKR", 8.91846074203526, 0.015921697131298, 0.615259402350111, 0.0258780232703177, 0.979354629065675, 0.996445652799236  
"15143", "MRM1", 7.70236286481052, -0.0134512673203148, 0.520296300386763, -0.0258530904607928, 0.979374515915919, 0.996445652799236  
"15144", "TOP2A", 3.98675777124747, 0.0210746008267526, 0.790057702321302, 0.0266747615583424, 0.978719143326518, 0.996445652799236  
"15145", "SEPTIN4", 7.66089440566064, 0.0156502030750887, 0.602695941253745, 0.0259669959657148, 0.979283662973487, 0.996445652799236  
"15146", "AC008982.2", 11.5537928263224, 0.0171700436519684, 0.644159533380592, 0.0266549554298434, 0.97873494071357, 0.996445652799236  
"15147", "ZNF335", 70.0576263196954, -0.00739653405473078, 0.285529123023807, -0.0259046572076435, 0.979333385379958, 0.996445652799236  
"15148", "SH3BGR", 13.3568536493292, 0.0127694319370224, 0.478663418864015, 0.0266772672274129, 0.978717144803063, 0.996445652799236  
"15149", "AP000547.3", 15.0449773062174, 0.0142634012924916, 0.538929781261202, 0.0264661590218904, 0.978885525327067, 0.996445652799236  
"15150", "POLA1", 21.9519184709087, -0.00936024463017312, 0.35741523578091



8,-0.0261887118765989,0.979106819413521,0.996445652799236  
"15151","GK",29.057788549106,0.00953969070766858,0.365161634157927,0.0  
261245700952877,0.979157979646385,0.996445652799236  
"15152","GNB1L",19.4071364429765,0.012361486929296,0.481902091325386,0  
.0256514490221404,0.979535349166873,0.996537579686335  
"15153","MY01C",445.138373453316,-0.00471765277377316,0.18458009033709  
2,-0.0255588387954382,0.979609217218124,0.996546959903477  
"15154","AL049597.2",29.530092683444,-0.0112544357642256,0.45418131545  
2442,-0.0247796097754798,0.980230755106605,0.996576308367802  
"15155","MAP10",14.3800488477597,-0.0113467188939138,0.45574166087119,  
-0.0248972605932571,0.980136912288117,0.996576308367802  
"15156","SLC8A1",7.21178094376163,-0.0161145175568323,0.64847522313735  
2,-0.0248498585325581,0.980174721962377,0.996576308367802  
"15157","IL17RC",122.521335380966,-0.00733155583488659,0.2909381957978  
87,-0.0251997020012449,0.97989567465036,0.996576308367802  
"15158","SRF",52.4529110094273,0.00640236004113249,0.257213891878407,0  
.0248911907299279,0.980141753837912,0.996576308367802  
"15159","PLAAT4",515.740137820968,0.00747454299891992,0.30246430746673  
8,0.024712148886334,0.980284564630619,0.996576308367802  
"15160","AP002360.1",27.1313857219982,-0.00887116212753286,0.358908132  
225582,-0.0247170830945595,0.980280628904234,0.996576308367802  
"15161","LRMP",4.24023091447273,0.0204578332905237,0.821229328315669,0  
.0249112307429185,0.980125769177524,0.996576308367802  
"15162","AC092140.1",4.85371712805695,0.0211536148615403,0.85254250343  
8975,0.0248123873897326,0.980204610392917,0.996576308367802  
"15163","RCAN1",90.1098098882529,0.00617223809014177,0.244423507068815  
,0.02525222784077,0.979853778426402,0.996576308367802  
"15164","ADPRH",15.6746043919817,0.01037866532343,0.423688863013059,0.  
0244959597229492,0.980457006423423,0.996616981221897  
"15165","EXOC3",156.516373741247,0.00394187754639221,0.162506612360728  
,0.0242567209366358,0.980647834652853,0.996616981221897  
"15166","PSMB8",538.134033666503,-0.00630414075580852,0.25868411021706  
5,-0.02437003475211,0.980557450027956,0.996616981221897  
"15167","DAPK1",10.800327354349,-0.0139141435655303,0.573294231160483,  
-0.0242705103405014,0.980636835538599,0.996616981221897  
"15168","LINC02352",6.37894849163067,0.0204899431890643,0.842313887050  
665,0.0243257810467891,0.980592748911684,0.996616981221897  
"15169","DDA1",122.923935635496,0.0049867483390218,0.206868876230646,0  
.0241058414870581,0.980768183844801,0.996673581249101  
"15170","NIPSNAP2",292.749200279865,0.00493984312101169,0.206123984526  
7,0.0239653970029471,0.980880209966197,0.996721716323594  
"15171","C1D",318.157222133764,0.00578653456435238,0.244279006470498,0  
.0236882188443452,0.981101303370704,0.996792544688915  
"15172","OCIAD1",781.051835044609,-0.00522368697499202,0.2216559316697  
49,-0.0235666464490331,0.981198277036061,0.996792544688915  
"15173","LINC01176",7.14885274847917,0.0165207215682309,0.698342437414  
017,0.02365704944403972,0.98112616598948,0.996792544688915  
"15174","PARD3",140.225677320647,0.00589632509800403,0.25033492679284,  
0.0235537452705647,0.981208567830659,0.996792544688915  
"15175","ITGB7",5.78679262016772,0.0178931121006298,0.763927613359431,

0.0234225230083561,0.981313239170457,0.996833184962939  
"15176","MRPS14",193.824463901623,0.00563700367991128,0.24358437818465  
1,0.0231418932606512,0.98153708863444,0.996916124686127  
"15177","WDR66",13.8052164627023,0.0118580892776958,0.513850243584185,  
0.0230769361808293,0.981588903048072,0.996916124686127  
"15178","GOLGA8A",91.9840618855354,-0.0105544656015632,0.4572162664053  
17,-0.0230841865809884,0.981583119606386,0.996916124686127  
"15179","AL359397.2",3.1117844609366,-0.018780538990843,0.820665153625  
65,-0.0228845332446147,0.981742377848635,0.99694062941612  
"15180","RANBP10",42.4338259430739,0.00688016248805882,0.3003128449562  
55,0.022909984050336,0.981722076366264,0.99694062941612  
"15181","ZFP69B",4.90117774122801,0.0139624479502347,0.689995456540526  
,0.0202355650575427,0.983855456875106,0.997051545162714  
"15182","ZNF684",42.5096072373681,0.00580819650291175,0.27946143365026  
6,0.0207835350554326,0.9834183320256,0.997051545162714  
"15183","ZRANB2",493.962149263343,-0.00413558098672614,0.2122130055352  
82,-0.0194878771746087,0.984451907821344,0.997051545162714  
"15184","CNN3",817.977212301836,-0.00484083659752154,0.246402423291403  
, -0.0196460592102076,0.984325720976129,0.997051545162714  
"15185","HCN3",9.9316199316781,0.0114179695285966,0.565647922495561,0.  
0201856474222022,0.983895277252134,0.997051545162714  
"15186","CD55",1732.50165497068,0.00553032933153672,0.266541791378778,  
0.0207484511262913,0.983446318915999,0.997051545162714  
"15187","COA6",195.236690461342,0.0055173698946406,0.282818667022793,0.  
0195085068207183,0.984435450873813,0.997051545162714  
"15188","TBCE",19.1788347819138,-0.00826905336844938,0.376500333705501  
, -0.0219629376873739,0.982477519842331,0.997051545162714  
"15189","INPP1",136.088573833187,0.0043804911563491,0.212318193620547,  
0.0206317276991244,0.983539430804574,0.997051545162714  
"15190","CTLA4",4.05913176243287,-0.0164623885108223,0.734637252763939  
, -0.0224088670277549,0.982121807263554,0.997051545162714  
"15191","RAF1",176.32519074946,-0.00399094659774586,0.189029136241568,  
-0.0211128648053793,0.983155622552232,0.997051545162714  
"15192","COLQ",8.6105191250958,-0.0129260223271664,0.587228867226226,-  
0.0220118986796791,0.982438464064324,0.997051545162714  
"15193","COPB2",400.425950956882,-0.00338945059172212,0.17435855267682  
2,-0.0194395430547336,0.984490465565126,0.997051545162714  
"15194","PCOLCE2",4047.26785607525,0.00504521507793521,0.2507834994714  
08,0.0201178111341827,0.983949391790135,0.997051545162714  
"15195","HAUS3",65.1979822712463,-0.00569875659994821,0.25249890820879  
1,-0.0225694306576404,0.98199372841517,0.997051545162714  
"15196","FIG4",62.0548447021072,0.00473360106875853,0.223551046489837,  
0.0211745869370096,0.983106386423263,0.997051545162714  
"15197","SYTL3",6.41905734392539,0.0131038984722422,0.641922682925316,  
0.0204135152422503,0.983713502493101,0.997051545162714  
"15198","AC083880.1",4.7026332876178,0.0155897124851267,0.746493505520  
304,0.0208839224585895,0.983338251847613,0.997051545162714  
"15199","CASP2",68.4368411636449,0.00506252416487317,0.25971779280681,  
0.0194924040827611,0.984448296557184,0.997051545162714  
"15200","LEPROTL1",144.949768369624,0.00457694032289237,0.214842097257

278,0.021303740660339,0.98300335990188,0.997051545162714  
"15201","LRRC69",5.2793047708504,-0.0139657514955366,0.669590308664834  
, -0.0208571589445259,0.983359601392058,0.997051545162714  
"15202","INTS8",62.9783499708989,-0.00524622362682237,0.23559309141936  
, -0.0222681556373994,0.982234050700614,0.997051545162714  
"15203","PKN3",4.46876911149384,0.0150576980825447,0.722933722203399,0  
.0208286010460973,0.983382382349449,0.997051545162714  
"15204","ZMYND19",42.536294405113,0.00557490187861768,0.27853398007366  
4,0.0200151589301359,0.984031279910489,0.997051545162714  
"15205","KIF1BP",149.477679771973,0.00462949549350658,0.21388106831506  
8,0.021645185943652,0.982730988792848,0.997051545162714  
"15206","AL121929.3",5.82358736115425,-0.0124493440855793,0.6242140690  
67598,-0.0199440299450077,0.984088021303273,0.997051545162714  
"15207","MS4A2",2.69513524584372,0.0273078578674038,1.22420064596909,0  
.0223066847394013,0.982203316559206,0.997051545162714  
"15208","AC026356.2",14.5101988886625,0.00925152899175279,0.4514516484  
66897,0.0204928457414442,0.983650219150737,0.997051545162714  
"15209","EIF4B",1023.70147046266,0.00503566208591506,0.230008538237213  
,0.0218933702396807,0.98253301329132,0.997051545162714  
"15210","CPB2-  
AS1",7.36850940941403,0.0124731361253272,0.601231834414732,0.020745967  
5475587,0.983448300098682,0.997051545162714  
"15211","MNAT1",187.14432168232,-0.00351960209783498,0.181206142021047  
, -0.0194231942614074,0.984503507552492,0.997051545162714  
"15212","TMEM30B",20.6516272472365,-0.00817024545371292,0.389130607649  
743,-0.0209961521738402,0.98324872512082,0.997051545162714  
"15213","INAFM2",8.98989202438159,-0.0114459300727962,0.51545363646834  
7,-0.0222055472364468,0.982283992627994,0.997051545162714  
"15214","MRPS11",192.935586695093,-0.00524708499350119,0.2416933534887  
35,-0.0217096784738259,0.982679543287571,0.997051545162714  
"15215","MEF2A",321.213159423099,0.00523358726510959,0.233022556270122  
,0.022459573651929,0.982081359410866,0.997051545162714  
"15216","NRN1L",2.71333302650729,-0.0175040662730138,0.88122236839461,  
-0.0198633930558325,0.98415234748924,0.997051545162714  
"15217","PIEZ02",32.9336324939016,-0.0100409293746624,0.51248975962430  
6,-0.0195924487974611,0.984368487665188,0.997051545162714  
"15218","TRAPPC5",793.900672270491,0.00517801079886927,0.2482219055137  
64,0.0208604103177435,0.983357007735863,0.997051545162714  
"15219","AC024075.1",12.2870731521501,-0.0110313504324933,0.5514812145  
45526,-0.0200031300097578,0.984040875679241,0.997051545162714  
"15220","AC008555.4",5.0084802635946,0.021703184423219,1.0443390601307  
,0.0207817415356492,0.983419762738336,0.997051545162714  
"15221","PIGT",1128.19866753019,-0.003562986365424,0.178144401495598,-  
0.0200005519988909,0.984042932222883,0.997051545162714  
"15222","HAND2-  
AS1",87.1853233998349,-0.00743297969009861,0.386581413368991,-0.019227  
4626586971,0.984659649616327,0.997113314963146  
"15223","AC139795.3",7.69756711595683,0.0130443230453349,0.68282437397  
9011,0.0191034818650687,0.984758553811154,0.997113314963146  
"15224","AC087284.1",3.27156808857534,-0.0150975380383892,0.7873912519

44836,-0.0191741246821052,0.984702199320216,0.997113314963146  
"15225","RIDA",87.2862166537393,-0.00516255253394888,0.274639779244696  
, -0.0187975410850778,0.985002615407212,0.997229431006317  
"15226","TBC1D13",68.4019048057453,0.00410858984573788,0.2183434612238  
64,0.0188170958851175,0.984987015693343,0.997229431006317  
"15227","NEURL1",2.58786480089173,0.0167019961492662,0.898051846512268  
,0.0185980310759687,0.985161773539096,0.997259570469212  
"15228","IFT43",175.389051011,0.00510655753694494,0.274081894582459,0.  
0186315026197712,0.985135071737686,0.997259570469212  
"15229","RAB42",57.7893403733315,-0.00731963789208908,0.40673294554728  
9,-0.0179961765384901,0.985641903598494,0.997365882187841  
"15230","COL16A1",346.148313990256,0.00356794331118039,0.1993414284184  
55,0.0178986542811894,0.985719702570986,0.997365882187841  
"15231","AP003392.5",3.61100143638721,-0.0148783673873198,0.8276697469  
13635,-0.0179762126654996,0.985657829888215,0.997365882187841  
"15232","THSD4",4.99288481089105,-0.0182602953035751,1.00281945451648,  
-0.0182089559803958,0.985472157982606,0.997365882187841  
"15233","COIL",119.280108061728,-0.00397439486496591,0.21867900689914,  
-0.0181745606097388,0.985499596977108,0.997365882187841  
"15234","AC123912.4",3.59240114523317,-0.018891350773688,1.03386781620  
012,-0.0182725010660659,0.985421464773973,0.997365882187841  
"15235","ZNF582",19.0631113456752,0.00662515049250003,0.36785287023081  
9,0.0180103270319541,0.985630614967798,0.997365882187841  
"15236","PDE4DIP",627.564844033067,0.00454407708407198,0.2568043995399  
43,0.0176947010729277,0.985882407918502,0.997371713833889  
"15237","FAM161A",27.5900011231633,-0.00625181522280679,0.355883772924  
487,-0.0175670140041292,0.98598427162599,0.997371713833889  
"15238","LINC00607",6.85155963046977,-0.0103306970186895,0.58738936477  
5059,-0.0175874771288133,0.985967946936768,0.997371713833889  
"15239","LINC00839",2.57824353596779,-0.0228791583445784,1.30222200829  
413,-0.0175693224341596,0.985982430049524,0.997371713833889  
"15240","GRSF1",172.345355912663,0.00306352266575214,0.178264571429289  
,0.0171852580756201,0.986288822805438,0.997614317817968  
"15241","MTBP",9.2990791206567,0.00816231989665197,0.479986019908425,0.  
.0170053284014589,0.986432364937729,0.997628585849304  
"15242","C14orf119",296.442588126854,0.00494561179146673,0.29023864903  
5434,0.0170398112308707,0.98640485560648,0.997628585849304  
"15243","GINS2",6.9534235286615,-0.0126504825979521,0.752413891226302,  
-0.0168131964939324,0.986585642105835,0.997718144266971  
"15244","LINC00115",4.77910125305689,-0.0104418052401053,0.72010076733  
4062,-0.0145004778688998,0.988430698019908,0.997743194173247  
"15245","BEND5",82.5701845610578,0.00414892625017947,0.27729941885429,  
0.0149619002712717,0.988062576157161,0.997743194173247  
"15246","CC2D1B",20.404448839513,0.00546578328376134,0.398292908140552  
,0.0137230243673647,0.989050954387433,0.997743194173247  
"15247","SELL",4.91849444778242,-0.0125884885759802,0.85320381974181,-  
0.0147543743765582,0.988228139587971,0.997743194173247  
"15248","AC012065.4",2.42150576181723,-0.0142155189694134,0.9750721690  
63448,-0.0145789403291732,0.988368100651259,0.997743194173247  
"15249","DNAJC10",266.697899739289,0.00281546525322681,0.1766069803571

6,0.0159419817242386,0.987280677678382,0.997743194173247  
"15250","CRELD1",95.0054323629436,-0.00570037894473676,0.3756272399948  
85,-0.0151756271584946,0.987892066133695,0.997743194173247  
"15251","ZDHC3",242.216269133927,-0.00289036474995529,0.1783591878035  
01,-0.0162053033855459,0.987070604530117,0.997743194173247  
"15252","CDV3",583.611060355157,0.00228293180213246,0.163884843766849,  
0.0139300971930039,0.98888574996932,0.997743194173247  
"15253","AC079298.3",5.36322624492275,-0.0107369582954526,0.7709004093  
24917,-0.0139278150142053,0.988887570707914,0.997743194173247  
"15254","RPS10-  
NUDT3",7.18518530614607,0.0105258267470761,0.744106909296124,0.0141455  
839417387,0.988713833359641,0.997743194173247  
"15255","IRAK1BP1",55.5699018036066,0.00412781052390192,0.281775690801  
397,0.0146492783396681,0.988311985031347,0.997743194173247  
"15256","RNF216",208.150134554155,-0.00253291492417887,0.1798105755374  
26,-0.0140865736990629,0.988760912030426,0.997743194173247  
"15257","SKAP2",270.68607126867,0.0054067324603628,0.393145107257818,0  
.0137525111226099,0.989027429580654,0.997743194173247  
"15258","PARP12",32.8427763296346,0.00413939832307418,0.30216402882003  
2,0.0136991763686723,0.989069980548906,0.997743194173247  
"15259","ZNF34",40.457718766484,-0.00355793937143806,0.252910954591461  
, -0.0140679527985862,0.988775767887363,0.997743194173247  
"15260","ANK3",8.41572752605923,-0.0115708928128635,0.705553625930896,  
-0.0163997354525633,0.986915490799787,0.997743194173247  
"15261","LRRC27",28.9200835898214,-0.00405520268224896,0.2946178709831  
31,-0.0137642793653924,0.989018040770092,0.997743194173247  
"15262","NRXN2",28.1462003289615,-0.00980111990885676,0.66775973105777  
3,-0.0146776144966561,0.988289378479698,0.997743194173247  
"15263","P3H3",199.906817952382,-0.00363284332985459,0.228883829573851  
, -0.0158719964473612,0.987336510786038,0.997743194173247  
"15264","AL162377.1",24.1500612417334,0.00582332319357634,0.3750768705  
43037,0.0155256792698129,0.987612797865706,0.997743194173247  
"15265","TYR03",26.9491492346826,-0.00613415339078181,0.39116587705810  
9,-0.0156817190622958,0.987488311280174,0.997743194173247  
"15266","OSGIN1",25.5526740098805,-0.00632713744488373,0.4209908213991  
59,-0.0150291576995801,0.988008918526749,0.997743194173247  
"15267","TRIM16L",10.9458397434908,-0.00733164473562839,0.477067013491  
682,-0.0153681653274823,0.987738460815323,0.997743194173247  
"15268","ATP6V0A1",110.129646105954,-0.00355367312006526,0.21400994332  
7368,-0.0166051776137768,0.986751593990121,0.997743194173247  
"15269","TMEM200C",3.23058059330544,0.0119557987438571,0.8106189609364  
12,0.0147489749438453,0.988232447243246,0.997743194173247  
"15270","AC016588.2",7.46566104987118,-0.00790726157125746,0.548555785  
806399,-0.0144146899474107,0.988499139724671,0.997743194173247  
"15271","ZNF700",25.1340961766512,0.00496138683314079,0.31976446443007  
, 0.0155157542035938,0.987620715969043,0.997743194173247  
"15272","SDHAF1",176.760070059304,0.00369416163160545,0.25404060653078  
1,0.0145416186886558,0.988397875855645,0.997743194173247  
"15273","CARD8-  
AS1",18.4659967403011,-0.00728329438415244,0.448236921381558,-0.016248

7605030479,0.987035935331796,0.997743194173247  
"15274","ZNF432",31.9176264193503,0.00539527910060841,0.32951636745192  
6,0.0163733265886877,0.986936559195725,0.997743194173247  
"15275","WFDC2",6.19297808272245,0.0105037787843373,0.680383076239326,  
0.0154380365284727,0.987682718275824,0.997743194173247  
"15276","MTFP1",8.21209797864923,0.00915292836903248,0.557719603814955  
,0.0164113441708413,0.98690622962907,0.997743194173247  
"15277","AL033543.1",2.8446683080989,-0.013701011303912,0.934104816590  
205,-0.0146675309457511,0.988297423123293,0.997743194173247  
"15278","RPS6KA3",204.067288331316,0.00381531084499023,0.2310288289743  
89,0.016514436150361,0.98682398527627,0.997743194173247  
"15279","DLG3",19.3085894953437,0.00705550306381289,0.44255642521612,0  
.0159426067769039,0.987280179021883,0.997743194173247  
"15280","AL136169.1",21.1498639201643,0.00600846922065969,0.4372834772  
6776,0.013740444203842,0.989037056679197,0.997743194173247  
"15281","CLIC2",169.338181988862,0.00323637986575698,0.231020069543024  
,0.0140090853238803,0.988822732708416,0.997743194173247  
"15282","CCNG1",370.294491305081,0.00239987170828357,0.179252193815855  
,0.0133882417681814,0.98931804771228,0.997797546812666  
"15283","PPP1R26",11.6721556432261,-0.00588263970553165,0.434210164678  
48,-0.0135479087871827,0.989190663416667,0.997797546812666  
"15284","AL355574.1",2.87748965657868,0.0115035756111491,0.85690879688  
3803,0.0134245040463845,0.989289117200333,0.997797546812666  
"15285","SCAMP3",93.675311613148,0.00305187953563199,0.231640632059755  
,0.0131750613374458,0.98948812608454,0.997838509982545  
"15286","AP001269.4",5.62242547055252,-0.00909220256760761,0.689787066  
265584,-0.0131811728753216,0.989483250206224,0.997838509982545  
"15287","LRFN5",23.1895728242276,0.00592705616447097,0.454515544015245  
,0.0130403816602412,0.989595575688573,0.997881585611261  
"15288","COPB1",470.659302041993,0.00274115054373919,0.2117325074705,0  
.0129462904703998,0.989670643259251,0.997892004568378  
"15289","EDC4",54.188269933625,-0.00318699085856519,0.247763279655685,  
-0.0128630475952455,0.989737055934017,0.997893695939752  
"15290","SLC25A53",18.9693080151487,-0.00453033879820845,0.35711922701  
5628,-0.0126857879819789,0.989878477103081,0.997971008799476  
"15291","ATAD2",45.7890060711104,0.00370042540174698,0.298348667024635  
,0.012403023075821,0.99010407310446,0.998133168982097  
"15292","PIIB",3247.13096439655,0.00304264705258537,0.24948447985807,0  
.0121957368022104,0.990269451112313,0.998169331648225  
"15293","SYP",14.2622337215519,0.00558492739887811,0.455012524639415,0  
.0122742278430775,0.990206829009936,0.998169331648225  
"15294","SPACA6",32.4175099294095,0.00362085270450335,0.30341901897329  
1,0.0119335060694468,0.990478665738072,0.998314936076395  
"15295","GPN1",89.1803112725627,-0.00268584660537615,0.233182213101868  
, -0.0115182310419312,0.99080998449035,0.998387757283223  
"15296","CIA01",277.924736034205,-0.00160895964356997,0.13761803090264  
6,-0.0116914886299179,0.990671754244265,0.998387757283223  
"15297","ILRUN",102.908086182916,0.00252033967198109,0.216125632025728  
,0.0116614565720787,0.990695714726101,0.998387757283223  
"15298","C21orf91",54.8038194792552,-0.00299917609016594,0.25911769042

8502,-0.0115745709418999,0.990765034750449,0.998387757283223  
"15299","NAGK",257.975202583301,0.002115809436347,0.185583648632935,0.  
0114008397395605,0.990903643048163,0.998416867611441  
"15300","LZTS2",243.322358146297,-0.00191720401190244,0.17335354572309  
2,-0.0110595027284005,0.991175973404826,0.998418138609461  
"15301","RAB11A",404.602406433994,0.00192299758703996,0.17461377918978  
7,0.011012862764684,0.991213184445616,0.998418138609461  
"15302","VAC14",51.0281515502267,-0.00260401596100783,0.23687187883587  
2,-0.0109933520762595,0.991228750780357,0.998418138609461  
"15303","LRRC37A",2.9412273184123,-0.00963160829109853,0.8720026753539  
86,-0.0110453884641909,0.99118723427051,0.998418138609461  
"15304","ENDOV",100.085422007754,-0.00275478414735753,0.24477962634255  
7,-0.0112541398502764,0.991020685115596,0.998418138609461  
"15305","NUDT16",133.157784286741,0.00271390231649093,0.25399963762165  
8,0.0106846700330076,0.99147502894857,0.998600952057642  
"15306","HBS1L",146.103837331215,-0.00194408389932549,0.18353732522135  
1,-0.01059230811488,0.991548718926884,0.998609924360245  
"15307","HTT",155.52009079919,0.00276087752536032,0.267578470057996,0.  
0103180107306911,0.991767564612734,0.998765075358025  
"15308","EX05",22.7171869047313,-0.00360079683725982,0.368482368811429  
, -0.00977196507087841,0.992203224028819,0.998877527325251  
"15309","SGTB",68.7810332752028,0.00216524480081807,0.216905795375884,  
0.00998242023485742,0.992035313293845,0.998877527325251  
"15310","LINC00265",6.19144456505371,0.00649412156693201,0.65441439467  
7319,0.00992356161440207,0.992082273352333,0.998877527325251  
"15311","SPAG9",575.898832313446,0.00185160521416117,0.186920296724223  
, 0.00990585424167704,0.992096401097237,0.998877527325251  
"15312","U2AF1L5",10.8613399979149,-0.00880439368878356,0.897430235679  
19,-0.00981067200406976,0.992172341844804,0.998877527325251  
"15313","CCDC13",7.60754624065897,-0.00549470089699549,0.5732062156688  
73,-0.00958590599123866,0.992351670742107,0.998961732155004  
"15314","SCYL3",42.0262920154944,-0.00252595575297597,0.26877204832951  
, -0.00939813410165032,0.992501484284407,0.998975710720783  
"15315","AC016065.1",20.1963426323053,-0.00370845137569063,0.391189756  
612206,-0.00947992965819625,0.992436223779982,0.998975710720783  
"15316","HSBP1",899.441930821619,0.00215353608650702,0.230946516403112  
, 0.00932482602486225,0.992559973104087,0.998975710720783  
"15317","PDLIM5",299.398993432595,-0.0021065016860352,0.23263181266103  
4,-0.00905508864819177,0.992775183303737,0.998996634938776  
"15318","ALKBH3",89.4363202203022,-0.00219200654708675,0.2407712018159  
99,-0.00910410601664027,0.992736074714316,0.998996634938776  
"15319","IL2RG",11.4504370672489,0.00460567105123742,0.503562608698655  
, 0.00914617362702873,0.992702511014903,0.998996634938776  
"15320","THNSL2",84.7374469858338,-0.00374803884303999,0.4346334208316  
35,-0.0086234483208135,0.99311956899995,0.999105157860196  
"15321","TANC1",16.6241035622168,0.00458472272368443,0.560034450462489  
, 0.00818650124094734,0.99346819001195,0.999105157860196  
"15322","CHROMR",52.3630104836005,-0.00245248120824631,0.2846318926098  
53,-0.00861632611074945,0.993125251490283,0.999105157860196  
"15323","AGFG1",215.33747798334,0.00146237334533094,0.171042186204952,

0.00854978165198757,0.993178344330847,0.999105157860196  
"15324","Z99289.3",3.58726859745971,0.00715195948383816,0.869548841915  
674,0.00822490829621706,0.993437546647208,0.999105157860196  
"15325","DPYSL2",1973.44298648866,-0.00216840138300197,0.2674540328912  
66,-0.00810756659587756,0.993531168656435,0.999105157860196  
"15326","UBE2D1",174.79818316033,-0.00190959115650754,0.22250329566358  
9,-0.00858230504322381,0.993152395371163,0.999105157860196  
"15327","PLBD1",558.497148301712,-0.0019658434408359,0.23678469856415,  
-0.00830224019016718,0.993375846829656,0.999105157860196  
"15328","SMYD4",152.57186959287,-0.00205181785201129,0.246411171611407  
,-0.00832680530916443,0.993356247377953,0.999105157860196  
"15329","RAI1",42.9622677601872,0.0026497911417234,0.322878370345456,0  
.00820677810931814,0.993452011955206,0.999105157860196  
"15330","UVSSA",50.4670500655663,-0.00257645968959547,0.32226051877252  
6,-0.00799495916970863,0.993621013471115,0.999128598893879  
"15331","RNF138",66.0675352363628,0.00226915714972736,0.28665895637814  
7,0.00791587738404376,0.993684109610254,0.999128598893879  
"15332","TTC5",117.027507945715,0.00176359170360828,0.226822577432094,  
0.00777520352503827,0.993796347656051,0.999176278314507  
"15333","KLHL29",47.3567453779108,-0.00237041388700342,0.3791797142060  
31,-0.00625142590227134,0.995012116277616,0.999177910390309  
"15334","KIF15",2.62886590713355,0.00511556355027032,0.832019552413791  
,0.00614836939279785,0.995094341895039,0.999177910390309  
"15335","C4orf36",11.4314570226556,0.00288548688580298,0.4643433589895  
94,0.00621412329893501,0.995041878870788,0.999177910390309  
"15336","KIFC1",6.61555623953988,0.00551201740678742,0.749737214262019  
,0.00735193251973361,0.994134059393727,0.999177910390309  
"15337","AL135910.1",12.7453432716857,0.0033303194118135,0.53386857021  
1274,0.00623808854395671,0.995022757742402,0.999177910390309  
"15338","AC007384.1",2.5218035371264,-0.00740398255935271,1.1251897894  
6762,-0.0065802077379816,0.994749791727261,0.999177910390309  
"15339","ESYT2",355.078419845237,0.00130977051296129,0.171633254005401  
,0.00763121645948673,0.993911229303953,0.999177910390309  
"15340","TEK",14.0020171469506,0.00382126648604029,0.564979178921976,0  
.00676355276194702,0.994603506819443,0.999177910390309  
"15341","APBB1",86.0728392649616,-0.00138492617346202,0.19136983509553  
6,-0.00723690947829177,0.994225832061001,0.999177910390309  
"15342","RPL27A",11223.5291290484,0.00140713920974538,0.19661931066278  
,0.00715666841167369,0.994289853511203,0.999177910390309  
"15343","ZP1",3.51830649783658,0.0064715657001234,0.927647018039032,0.  
00697632350913362,0.994433744331699,0.999177910390309  
"15344","ZNF106",923.827077466056,-0.00140148405074096,0.2088368729279  
2,-0.00671090325713067,0.994645514093094,0.999177910390309  
"15345","AC005332.2",3.55756899766152,-0.00532984294232566,0.784493332  
134524,-0.00679399393723808,0.994579218833711,0.999177910390309  
"15346","RPRD1A",76.7962796963438,-0.00162389570708593,0.2406173306732  
69,-0.00674887258761506,0.994615219636565,0.999177910390309  
"15347","ZNF627",14.3064263974818,-0.00270811670364135,0.4149330169794  
07,-0.00652663584921648,0.99479253499233,0.999177910390309  
"15348","AKAP8",86.7530326928847,-0.00173691299450418,0.24745951743541



9,-0.00701897834645812,0.994399711528811,0.999177910390309  
"15349","DNTTIP1",134.164976863939,0.00151976825475182,0.2224575673233  
77,0.00683172199101951,0.99454911690069,0.999177910390309  
"15350","PRDM15",11.5460884790497,0.00358112556298304,0.48918793037643  
6,0.00732055175651477,0.99415909694643,0.999177910390309  
"15351","UBE2G2",227.991187401616,-0.00163538546385838,0.2564374973402  
41,-0.00637732578433546,0.994911664708166,0.999177910390309  
"15352","SFI1",30.0558435422076,-0.00231957404375613,0.33947918505453,  
-0.00683274305428636,0.994548302229088,0.999177910390309  
"15353","BEND3",3.97226611601468,-0.00485890459007277,0.82638580854730  
8,-0.00587970478173405,0.995308701363016,0.999203105103264  
"15354","FAM210A",73.4814561499471,-0.001324960355545,0.22199367035780  
3,-0.00596846006198949,0.995237886137866,0.999203105103264  
"15355","SMIM11A",7.57571034030369,-0.0031616575854675,0.5383197415478  
, -0.00587319643224855,0.995313894184925,0.999203105103264  
"15356","PENK",43.4051725834449,0.00326096114629976,0.56806559100009,0  
.0057404658862699,0.995419796052748,0.999244344630966  
"15357","SUC0",137.367166603996,-0.000939109940546599,0.17016149358881  
, -0.00551893334232204,0.995596550647908,0.99927609702041  
"15358","MIER3",40.6847231834314,0.00157546325883976,0.280550706679637  
, 0.00561560966103284,0.995519415301239,0.99927609702041  
"15359","ASB13",57.2760186718591,-0.00145783123354027,0.26714492193732  
5,-0.00545708008585053,0.995645901663086,0.99927609702041  
"15360","AC016831.1",59.947662482419,-0.00404333197541264,0.7769819947  
75904,-0.00520389404464747,0.995847912025842,0.99928365863028  
"15361","PGR-  
AS1",4.83370776832404,-0.00331713987012588,0.634279906155628,-0.005229  
77290929973,0.99582726396026,0.99928365863028  
"15362","RALBP1",570.796417002877,0.00084334454628144,0.15995294417415  
3,0.00527245403725252,0.995793209816742,0.99928365863028  
"15363","RAB1A",613.561730966647,0.000765773074955006,0.15493446880665  
, 0.0049425610766488,0.996056422882338,0.999365164970666  
"15364","C19orf38",2.74945519494525,0.00434814021025061,0.880264744680  
948,0.00493958236601489,0.996058799520552,0.999365164970666  
"15365","SLC16A1",175.565350411801,0.00111317658768787,0.3109555079458  
82,0.00357985808015211,0.997143692608762,0.99942788160094  
"15366","ABL2",829.467808521219,0.00235431670065886,0.64487547719997,0  
.00365080823181746,0.997087082948137,0.99942788160094  
"15367","AC017048.3",2.4711826729831,-0.00323771961429574,0.9760056137  
77168,-0.00331731658977419,0.997353169164273,0.99942788160094  
"15368","CHCHD4",35.914490362254,-0.00100535880928004,0.27499691883524  
6,-0.00365589117702937,0.997083027371694,0.99942788160094  
"15369","LINC01094",3.0781934335263,0.00356369857183822,0.854730444121  
115,0.00416938298658898,0.996673323325284,0.99942788160094  
"15370","PLAC8",4.91079961357148,-0.00321070408831757,0.72017361721065  
9,-0.00445823619692305,0.996442853953629,0.99942788160094  
"15371","GOLPH3",319.406461563064,0.000476309376003649,0.1391935119866  
31,0.00342192225201845,0.997269706395267,0.99942788160094  
"15372","HOXA11",31.1052280373569,0.00136851253955511,0.32156135542203  
1,0.00425583645696173,0.996604344048126,0.99942788160094

"15373", "MPLKIP", 261.566493438125, 0.000946473736926772, 0.208287512099121, 0.00454407336948917, 0.996374366492711, 0.99942788160094  
"15374", "TYW1", 55.9360767323186, -0.000854492602804153, 0.254423227294448, -0.00335854792776147, 0.997320271499544, 0.99942788160094  
"15375", "IPMK", 107.5363050677, 0.00100325765447352, 0.268200998666812, 0.00374069320942339, 0.997015365602061, 0.99942788160094  
"15376", "AC037198.1", 70.706519322283, 0.00332524437370657, 0.90572723083908, 0.00367135298629148, 0.997070690715594, 0.99942788160094  
"15377", "HDGFL3", 216.971365385062, -0.000997977044325438, 0.235215532898779, -0.00424281947721072, 0.996614730001529, 0.99942788160094  
"15378", "LRRC36", 6.31069908972728, -0.00274845411675754, 0.73796727158053, -0.00372435773590756, 0.997028399333381, 0.99942788160094  
"15379", "FAM157C", 5.80994679731344, 0.0026272949627175, 0.718890156127941, 0.00365465424769277, 0.997084014291921, 0.99942788160094  
"15380", "COPZ2", 1162.30131930094, 0.000858279463545839, 0.25465495264211, 0.00337036234575833, 0.997310845011181, 0.99942788160094  
"15381", "ZNF223", 19.7673324647604, -0.00145582194715095, 0.38439956148647, -0.00378726224744195, 0.996978209148826, 0.99942788160094  
"15382", "ZNF460-  
AS1", 2.47539890069809, -0.00450703060692895, 0.951383869848036, -0.0047373418341104, 0.996220162229433, 0.99942788160094  
"15383", "ATXN10", 393.971430380483, 0.000787637846519238, 0.222296352108858, 0.00354318835665613, 0.997172950629425, 0.99942788160094  
"15384", "CNNM4", 18.6825059426973, 0.0012233256139125, 0.380387704421334, 0.00321599673094977, 0.997434010283966, 0.999443920211085  
"15385", "PRPF6", 282.499441067194, 0.00056965681812609, 0.186268267743467, 0.00305826013752721, 0.997559865257094, 0.999505058364517  
"15386", "RIOX2", 84.3517675390638, -0.000641647808627544, 0.232795130325294, -0.0027562767645996, 0.997800812108788, 0.999637063439276  
"15387", "ITSN1", 190.567775807379, 0.000579621588924101, 0.21227001671908, 0.00273058624992326, 0.997821310096668, 0.999637063439276  
"15388", "ITGA9", 48.097866828079, 0.000708406171343762, 0.286591061665691, 0.00247183623671459, 0.99802776203828, 0.999675423105244  
"15389", "ZNF425", 15.6782239795828, 0.00126159489241506, 0.517309869226515, 0.00243876053302715, 0.998054152552041, 0.999675423105244  
"15390", "EML3", 61.4627886593694, 0.000562814688728149, 0.229727675709189, 0.00244992113810707, 0.998045247704161, 0.999675423105244  
"15391", "NKAPD1", 182.090796275204, 0.000541768689110895, 0.231781793530607, 0.00233740830484753, 0.998135019699483, 0.999691464405661  
"15392", "WDR47", 58.6597080867538, -0.000422073683062773, 0.275934083332577, -0.00152961779119565, 0.998779542056399, 0.999797713807051  
"15393", "RBM15", 28.9513022315626, 0.00055366223391797, 0.356175514353083, 0.00155446461535566, 0.998759717182588, 0.999797713807051  
"15394", "OTUD7B", 70.6694271109643, -0.000482767902975499, 0.289857208174656, -0.00166553699325153, 0.998671094362039, 0.999797713807051  
"15395", "MARC0", 5.30888944068439, 0.00115670271674247, 0.730564614850863, 0.00158329967429178, 0.998736710162569, 0.999797713807051  
"15396", "RTP4", 43.7527581895901, 0.000333541971538184, 0.359084293234439, 0.000928868173357896, 0.999258870532031, 0.999797713807051  
"15397", "PAICS", 77.6709838856903, 0.000156384494950722, 0.22209204495963

8,0.000704142712446738,0.999438175447564,0.999797713807051  
"15398","GYPE",5.2283884009057,0.000492371168982393,0.639267640532088,  
0.000770211313328128,0.9993854603453,0.999797713807051  
"15399","TTC33",82.6332942284715,0.000229118930470534,0.21132440445263  
1,0.00108420478488509,0.999134929910873,0.999797713807051  
"15400","AC011374.2",9.76814309184407,-0.000428658492950823,0.47748579  
8519046,-0.000897740821361255,0.999283706555248,0.999797713807051  
"15401","AARS2",28.3205157954384,-0.000386023242756412,0.3465652117287  
46,-0.00111385456385204,0.999111272824292,0.999797713807051  
"15402","KMT2E-  
AS1",117.994256324423,-0.000236659128031481,0.32637933366946,-0.000725  
104513728668,0.999421450354225,0.999797713807051  
"15403","CAPN5",82.2264865103137,0.000166286376224309,0.25196044334641  
4,0.000659970168395387,0.999473420030273,0.999797713807051  
"15404","TMEM126B",327.242332899794,-0.000375138343692037,0.2590418433  
91773,-0.00144817662961378,0.998844522629797,0.999797713807051  
"15405","IP05",403.063963476282,0.00022676169373112,0.219699314867547,  
0.00103214565720349,0.999176467061839,0.999797713807051  
"15406","C15orf40",203.300030258014,0.000353668140925051,0.24738712688  
6302,0.00142961416536276,0.998859333318101,0.999797713807051  
"15407","C10TNF1",134.437343244687,0.000681734211109054,0.357202297490  
524,0.0019085381474265,0.998477207802931,0.999797713807051  
"15408","GPATCH1",52.231454573484,-0.000317800071607032,0.316450007741  
023,-0.00100426627850524,0.999198711576136,0.999797713807051  
"15409","NRIP1",261.271726269095,0.000241864034857123,0.29738128397712  
5,0.000813312901277699,0.999351070264511,0.999797713807051  
"15410","NCAPH2",74.9985133732684,0.000168437888962756,0.2357372948884  
62,0.000714515236303409,0.999429899373004,0.999797713807051  
"15411","EHMT2",119.055857566775,6.93548783284078e-05,0.20212157726124  
3,0.000343134460299438,0.99972621831722,0.999920818541393  
"15412","WARS",111.623363313486,-0.000104451983086876,0.26777496891990  
2,-0.00039007373806519,0.999688766194716,0.999920818541393  
"15413","ZNF142",26.1228144668409,-8.33425110144964e-05,0.323009550373  
781,-0.000258018720864612,0.999794130848508,0.999923864726514  
"15414","AL109811.2",11.4922822286378,6.95619766910785e-05,0.537298599  
849906,0.000129466141751552,0.999896700964638,0.999957593667592  
"15415","FAM160A2",59.6498163500879,1.25248002816982e-05,0.23565689838  
6346,5.31484559436255e-05,0.999957593667592,0.999957593667592  
"15416","AL627309.1",1.00859034074865,-0.435797724977332,1.42291014608  
741,-0.306272132625978,0.75939745530186,NA  
"15417","AL627309.4",0,NA,NA,NA,NA,NA  
"15418","LINC02593",1.14184429646053,0.332343452219126,1.4056282725974  
5,0.236437654747077,0.813093080067267,NA  
"15419","PLEKHN1",0.386471127445929,-0.0386990368869363,2.948184401817  
32,-0.0131263963214382,0.989526951792023,NA  
"15420","AL645608.7",1.52315122773972,-2.58211824294629,1.403324413960  
56,-1.84000094152061,0.0657680990903939,NA  
"15421","AL390719.2",0,NA,NA,NA,NA,NA  
"15422","TTLL10",0.11921983002294,-0.0533240139618846,3.35247519753738  
,-0.0159058638229612,0.987309491940711,NA

"15423", "TNFRSF18", 1.91369782089535, 0.0759991728967967, 1.0872288090647  
1, 0.0699017283787532, 0.944271877449301, NA  
"15424", "AL162741.1", 0.339262812684241, -0.0349910483728248, 3.044545146  
73679, -0.0114930298899752, 0.990830090769536, NA  
"15425", "LINC01786", 0.814733617497782, -0.193339265296354, 1.55074217852  
977, -0.124675312229952, 0.900780602863336, NA  
"15426", "TAS1R3", 0.106924501560529, 0.385965786494404, 3.34626872025989,  
0.115342137395477, 0.908173940404949, NA  
"15427", "AL391244.2", 1.39165028575412, 1.7292609753857, 1.31489514934677  
, 1.31513221890337, 0.188465470112326, NA  
"15428", "AL691432.4", 1.11737048510541, 1.16192750615122, 1.4089065868925  
9, 0.824701592682522, 0.409541027261111, NA  
"15429", "F0704657.1", 1.23352163826391, 1.42074007252515, 1.4130372299748  
1, 1.005451266525, 0.314679604482407, NA  
"15430", "AL109917.1", 0.869022315416839, 0.093937739887387, 1.63454497395  
29, 0.0574702693314168, 0.954170588589465, NA  
"15431", "CALML6", 0, NA, NA, NA, NA, NA  
"15432", "TMEM52", 2.09548613746448, 0.147476341872636, 1.01417897358913, 0  
.145414513328673, 0.88438360647713, NA  
"15433", "CFAP74", 0.0644961186387932, -0.0533240139618838, 3.352475197537  
38, -0.015905863822961, 0.987309491940711, NA  
"15434", "PRKCZ", 1.80199799011714, -1.78329358926266, 1.17202411252997, -1  
.52155025668643, 0.128121809600567, NA  
"15435", "AL590822.2", 0, NA, NA, NA, NA, NA  
"15436", "PRKCZ-  
AS1", 2.28399373463185, 1.89996376012645, 1.22083918964396, 1.556276843210  
24, 0.119642275472047, NA  
"15437", "AL590822.1", 0.33713047520475, -2.38103637458962, 3.318158042575  
58, -0.71757774766552, 0.473017682228765, NA  
"15438", "PLCH2", 0.661683056549067, -0.343917858269042, 1.78926130366842,  
-0.192212203753542, 0.847575986925823, NA  
"15439", "AL139246.1", 0.102230937222884, -1.35173207482145, 3.35247519753  
738, -0.403204198442509, 0.686798011343181, NA  
"15440", "HES5", 0.221906102043421, 0.695830468846429, 3.33747149841039, 0.  
208490310457437, 0.834846147549618, NA  
"15441", "AL139246.3", 0.204917209243366, -0.774663427007578, 3.3524751975  
3738, -0.231072082972194, 0.817258802814834, NA  
"15442", "MMEL1", 0.306195696679323, -0.0320258052725539, 3.12823849898919  
, -0.0102376482109348, 0.991831681239967, NA  
"15443", "TTC34", 1.64551406401988, -0.0989887317513684, 1.1959363631575, -  
0.0827709021991934, 0.934033706394291, NA  
"15444", "AL513320.1", 0.142120095111522, -0.0533240139618842, 3.352475197  
53738, -0.0159058638229611, 0.987309491940711, NA  
"15445", "TP73", 0.102230937222884, -1.35173207482145, 3.35247519753738, -0  
.403204198442509, 0.686798011343181, NA  
"15446", "AL365330.1", 0.453961805915417, 0.69652223287419, 2.14678704892  
418, 0.324448679544842, 0.745598370244741, NA  
"15447", "LINC01134", 0.427278646084383, 1.70712042304806, 2.8512221216445  
2, 0.598732876715838, 0.549351029677302, NA  
"15448", "AL365255.1", 0.102230937222884, -1.35173207482145, 3.35247519753

738,-0.403204198442509,0.686798011343181,NA  
"15449","CHD5",0.408923748891538,-2.68302595843898,3.30195635283568,-0.812556457972206,0.416472404531544,NA  
"15450","AL031847.1",1.01805228843917,-1.66014650570637,1.53774197859947,-1.07960017272754,0.280320264501851,NA  
"15451","LINC00337",0,NA,NA,NA,NA,NA  
"15452","HES2",0,NA,NA,NA,NA,NA  
"15453","ESPN",1.16355776238671,-1.91345529175563,1.45028686379071,-1.31936332013262,0.187047678228943,NA  
"15454","PLEKHG5",0.448315791790845,0.611004695004865,2.47222544714815,0.247147644123514,0.804793962455449,NA  
"15455","CAMTA1-DT",0.773029552193966,0.461207745456809,1.79633622052261,0.256749120898219,0.797372449241136,NA  
"15456","Z98884.2",0.333884508879529,-1.5113465063233,2.58424426686441,-0.58483113446435,0.558661267333854,NA  
"15457","Z98884.1",0.100823152638361,-1.35173207482145,3.35247519753738,-0.40320419844251,0.686798011343181,NA  
"15458","UTS2",1.49278441597327,-0.414389095158588,1.3392266522287,-0.309424169888626,0.756998886985921,NA  
"15459","TNFRSF9",0.320866135299661,-1.37464340165215,3.04127275254598,-0.451996092919114,0.651271797119151,NA  
"15460","RERE-AS1",2.12285568356943,-0.352693634661574,1.07140161817639,-0.329189006884165,0.742012831553934,NA  
"15461","EN01-AS1",2.13436577996874,-0.887045901846178,1.01034669026297,-0.877961901983666,0.379964394138824,NA  
"15462","CA6",0,NA,NA,NA,NA,NA  
"15463","BX323043.1",1.03518062743572,-1.45969245692104,1.65231975987607,-0.88342008149229,0.3770093447387,NA  
"15464","PIK3CD-AS1",0,NA,NA,NA,NA,NA  
"15465","AL139424.3",1.01611858211772,1.06013142516061,1.55276973678511,0.682735759234677,0.49477382938523,NA  
"15466","AL354956.1",0.168565237602375,-1.35173207482145,3.35247519753738,-0.40320419844251,0.686798011343181,NA  
"15467","AL139423.2",0.102686272020481,-0.0533240139618846,3.35247519753738,-0.0159058638229612,0.987309491940711,NA  
"15468","AL139423.1",0.273505233441565,-0.226106766776126,2.74490218220006,-0.082373342205914,0.934349833830783,NA  
"15469","C1orf127",0,NA,NA,NA,NA,NA  
"15470","MASP2",0,NA,NA,NA,NA,NA  
"15471","AL109811.1",1.67650834192902,-1.15568133263117,1.29159545900255,-0.894770359074854,0.370909858358901,NA  
"15472","ANGPTL7",0.850333730428894,2.76045730699051,2.38471934904185,1.15756066142527,0.247043370659998,NA  
"15473","DISP3",0.341125932066361,1.37790492328387,3.03290540471936,0.454318463457443,0.649599628836418,NA  
"15474","DRAXIN",0.535446817354266,2.03137562790896,1.82471980207838,1.11325345710349,0.265599589622981,NA

"15475", "AL096840.2", 0.738500907215511, 0.657005433403435, 1.54921663922  
283, 0.424088805122198, 0.671501049531571, NA  
"15476", "TNFRSF8", 0.713737522744808, -0.105587064070375, 1.7267913944309  
5, -0.0611463923267756, 0.951242622512901, NA  
"15477", "AADACL4", 0, NA, NA, NA, NA, NA  
"15478", "KAZN-  
AS1", 0.307603481263847, -0.0321837065735757, 3.12361882183901, -0.0103033  
399429408, 0.99177926958558, NA  
"15479", "TMEM51-  
AS1", 1.67473541937872, 0.0132358536717863, 1.1666005477919, 0.01134566042  
92177, 0.990947666920602, NA  
"15480", "TMEM51", 0.833092690776395, -0.950572047199096, 1.65013793020735  
, -0.576056116157303, 0.564577252127531, NA  
"15481", "AL031283.1", 1.41532536934449, -0.455522434715539, 1.27242117797  
723, -0.357996583678121, 0.720345870182927, NA  
"15482", "CTRC", 0.306195696679323, -0.0320258052725539, 3.12823849898919,  
-0.0102376482109348, 0.991831681239967, NA  
"15483", "CELA2A", 0, NA, NA, NA, NA, NA  
"15484", "AL121992.3", 0, NA, NA, NA, NA, NA  
"15485", "AGMAT", 1.32088298460996, -0.199046777988837, 1.21012139869447, -  
0.164484966717866, 0.869349380387406, NA  
"15486", "AL121992.1", 0.622132058049334, 1.13749906195951, 2.000757867946  
45, 0.568534094096567, 0.569672361897874, NA  
"15487", "AL121992.2", 0.275368352823686, 1.11865680170283, 2.739778946225  
96, 0.408301846119294, 0.683052084109357, NA  
"15488", "AL450998.3", 0.221906102043421, 0.695830468846429, 3.33747149841  
039, 0.208490310457437, 0.834846147549618, NA  
"15489", "CLCNKB", 0.102230937222884, -1.35173207482145, 3.35247519753738,  
-0.403204198442509, 0.686798011343181, NA  
"15490", "AL451042.2", 0.798148503719929, -1.43435285640033, 1.66949916261  
992, -0.859151587802793, 0.390256888870483, NA  
"15491", "SPATA21", 1.694495451611, -0.25726189363024, 1.29419227258181, -0  
.198781818652821, 0.842433418785842, NA  
"15492", "AL137802.2", 0.963127969960388, 1.09924799784837, 1.513956723152  
99, 0.7260762352302, 0.467792036799851, NA  
"15493", "AL137798.1", 0.759926632001453, 1.65892682353636, 1.910665493964  
78, 0.868245555685395, 0.385259920092006, NA  
"15494", "BX284668.2", 0.362053593518754, 0.143931775625763, 2.98640704900  
717, 0.0481956321639453, 0.96156033117261, NA  
"15495", "BX284668.6", 1.22260477571273, 0.833930219444167, 1.394396853180  
56, 0.598058018807206, 0.549801220814632, NA  
"15496", "PADI2", 0.5415107767392, 0.0702417634040783, 1.89262582391733, 0.  
0371133916257641, 0.970394594411954, NA  
"15497", "PADI4", 0.257924125226034, -1.38354199007994, 3.26926698797967, -  
0.423196390862814, 0.672151979809054, NA  
"15498", "PADI6", 0, NA, NA, NA, NA, NA  
"15499", "IGSF21", 0.730768952112098, -3.4752872980483, 2.3415420726883, -1  
.48418742442597, 0.137759205065048, NA  
"15500", "PAX7", 0, NA, NA, NA, NA, NA  
"15501", "AL137127.1", 1.53931096496922, 0.234186582201244, 1.274671836122

81,0.183723038012335,0.854230734821922,NA  
"15502","HTR6",0.388608220263676,-1.50962735921242,2.47349094131884,-0.610322574461302,0.541648145797489,NA  
"15503","PLA2G2D",0,NA,NA,NA,NA,NA  
"15504","Z98257.1",0.311841710803895,0.171849028305229,2.65045670284036,0.064837515784003,0.948303371003042,NA  
"15505","PLA2G2C",0.142120095111522,-0.0533240139618842,3.35247519753738,-0.0159058638229611,0.987309491940711,NA  
"15506","VWA5B1",0.102686272020481,-0.0533240139618846,3.35247519753738,-0.0159058638229612,0.987309491940711,NA  
"15507","KIF17",0.386770038522978,-0.777140795601295,2.23651825660742,-0.347477957448084,0.728232275507767,NA  
"15508","AL031005.1",0,NA,NA,NA,NA,NA  
"15509","AL031728.1",0,NA,NA,NA,NA,NA  
"15510","LINC02596",0.205372544040962,0.695830627438559,3.33747149429751,0.208490358233014,0.834846110249776,NA  
"15511","RAP1GAP",0,NA,NA,NA,NA,NA  
"15512","LINC01635",0.274106892219803,1.20013018856317,2.69897131421608,0.444662076340649,0.65656397946606,NA  
"15513","AL445253.1",0.814451955508494,1.44466822453588,1.95073437016139,0.740576598553679,0.458950201335191,NA  
"15514","TEX46",0.38679665665695,-0.154274896056064,2.50238787680135,-0.0616510723562424,0.950840704404243,NA  
"15515","AL109936.6",0.102686272020481,-0.0533240139618846,3.35247519753738,-0.0159058638229612,0.987309491940711,NA  
"15516","E2F2",0.322273919884185,-1.38549380438952,2.60912169626995,-0.531019233932344,0.595405450737739,NA  
"15517","MDS2",0.376337829442688,0.498741423931096,2.21785614790155,0.224875461108236,0.82207615960145,NA  
"15518","CNR2",0,NA,NA,NA,NA,NA  
"15519","MYOM3",0.370691815318116,0.409327796421713,2.565354855683,0.159559912545796,0.873227759460615,NA  
"15520","IFNLR1",0,NA,NA,NA,NA,NA  
"15521","RCAN3AS",0.49440128137563,0.471668930345083,2.14383053342663,0.220012227175057,0.825861632100525,NA  
"15522","NCMAP-DT",1.05284964339392,-0.695596485407407,1.70287379667367,-0.40848387400532,0.682918467285881,NA  
"15523","AL031432.1",0.102686272020481,-0.0533240139618846,3.35247519753738,-0.0159058638229612,0.987309491940711,NA  
"15524","AL031432.4",2.32457944006572,0.375476501357327,1.06948771442216,0.351080705550876,0.725527802523938,NA  
"15525","AL031432.5",0.271251509622856,-0.774665352300728,3.18287089738686,-0.243385728568736,0.8077065984266,NA  
"15526","AL031432.3",0.970696002889987,-0.958051871205916,1.53703415776904,-0.623312023589963,0.533079498109511,NA  
"15527","RHD",1.38684195603497,-0.1963154661365,1.56683905864099,-0.125293957317337,0.900290835849549,NA  
"15528","RHCE",1.74267570825501,-0.510068090493125,1.0463804189144,-0.487459514028665,0.625932727020553,NA

"15529", "AL606491.1", 1.36803476087338, -2.99672773675174, 1.47469634048064, -2.03209817132593, 0.0421437184903384, NA  
"15530", "AL020996.1", 0.839660360468155, 1.85320889805573, 1.65603544095526, 1.11906354913922, 0.26311302894285, NA  
"15531", "AUNIP", 0.221906102043421, 0.695830468846429, 3.33747149841039, 0.208490310457437, 0.834846147549618, NA  
"15532", "SLC30A2", 0, NA, NA, NA, NA, NA  
"15533", "TRIM63", 0.388633157905099, 0.432636944008462, 2.25154176219256, 0.192151418762563, 0.84762359891593, NA  
"15534", "FAM110D", 0.25651634064151, -1.38285975574301, 2.79187243968638, -0.495316238695472, 0.62037691003485, NA  
"15535", "CNKSR1", 1.01480632211395, -1.19759671546903, 1.47488335863673, -0.811994188188553, 0.416794966355299, NA  
"15536", "CRYBG2", 0.155693188003149, -0.774663427007578, 3.35247519753738, -0.231072082972193, 0.817258802814835, NA  
"15537", "ZNF683", 0.49083915748656, -1.97471909140065, 2.06099924310347, -0.958136737802533, 0.337993812366009, NA  
"15538", "AL513365.2", 0.244806367132003, 0.695807100884759, 3.33664907448574, 0.208534696143316, 0.834811494458112, NA  
"15539", "AL512408.1", 0.166727055861678, -0.774663427007578, 3.35247519753738, -0.231072082972193, 0.817258802814835, NA  
"15540", "SFN", 1.67438827562641, -1.48382520087609, 1.17756855905666, -1.26007542360402, 0.207642155049065, NA  
"15541", "TENT5B", 0.907272818127666, 1.85637767679242, 1.68208111213471, 1.10361959563086, 0.269758187189889, NA  
"15542", "FCN3", 0.203054089861245, -1.95461545718866, 3.33573296423696, -0.585962808817275, 0.557900507779092, NA  
"15543", "GPR3", 0.481984566574001, 1.85204954024787, 1.89977319937515, 0.974879286041629, 0.329620142128351, NA  
"15544", "BX293535.1", 0.100823152638361, -1.35173207482145, 3.35247519753738, -0.40320419844251, 0.686798011343181, NA  
"15545", "LINC02574", 1.47508906802049, -1.47739728876647, 1.39341564454087, -1.06027034686644, 0.289021625545623, NA  
"15546", "AL445490.1", 0, NA, NA, NA, NA, NA  
"15547", "AL020997.3", 0.605458929962323, 1.3587872537337, 2.23726713128907, 0.607342428952948, 0.543623686302899, NA  
"15548", "SMPDL3B", 0, NA, NA, NA, NA, NA  
"15549", "MATN1", 0.946742223007766, 1.85421310415993, 1.83918783512513, 1.0081695130578, 0.313373091050922, NA  
"15550", "AL137857.1", 0, NA, NA, NA, NA, NA  
"15551", "LINC01778", 0.351019725660226, 0.108771112860584, 2.57102516275453, 0.0423065143182222, 0.966254352262437, NA  
"15552", "NKAIN1", 1.42589211255034, 1.326619962987, 1.43656688395965, 0.923465505017357, 0.355764668741914, NA  
"15553", "LINC01226", 0.204461874445769, -1.96013641505178, 3.33548947920397, -0.587660799793491, 0.556759992345141, NA  
"15554", "TINAGL1", 1.48384839001968, -1.30126035393189, 1.21671071456652, -1.06949033846183, 0.284848780051555, NA  
"15555", "AC114488.2", 0, NA, NA, NA, NA, NA  
"15556", "AC114488.3", 0.809498529142306, 0.262301872428355, 1.85437229081



376,0.14145049175279,0.887514068560467,NA  
"15557","SPOCD1",1.3413121018751,-2.02981604173222,1.45970962760746,-1  
.39056152219754,0.164358431161503,NA  
"15558","AL354919.1",0.762689251041947,1.26624442040671,1.944956073852  
66,0.651040112128842,0.515020593855944,NA  
"15559","AL136115.2",2.12558713570254,-1.27837547043398,1.044428270664  
53,-1.2239954684687,0.220953937000978,NA  
"15560","AL136115.1",0.102230937222884,-1.35173207482145,3.35247519753  
738,-0.403204198442509,0.686798011343181,NA  
"15561","AL445248.1",1.31188114559971,1.15107175458679,1.5976847029847  
8,0.720462399393551,0.471240342483413,NA  
"15562","AL049795.2",1.33619011938986,1.59631742558297,1.3352814995276  
4,1.19549130737427,0.231895130478488,NA  
"15563","AL049795.1",1.15773584353188,1.08805168770263,1.6093646816744  
2,0.676075286162359,0.498992846686479,NA  
"15564","DCDC2B",0,NA,NA,NA,NA,NA  
"15565","FAM167B",1.55102445354758,1.00508267661213,1.26597832858457,0  
.79391775824146,0.427243310802941,NA  
"15566","AL031602.2",0.102686272020481,-0.0533240139618846,3.352475197  
53738,-0.0159058638229612,0.987309491940711,NA  
"15567","AL020995.1",0,NA,NA,NA,NA,NA  
"15568","AL662907.3",0.221906102043421,0.695830468846429,3.33747149841  
039,0.208490310457437,0.834846147549618,NA  
"15569","AL513327.1",1.20316379544403,2.19479195209787,1.7980751504438  
1,1.22063416067796,0.222224566249011,NA  
"15570","GJA4",0.25651634064151,-1.38285975574301,2.79187243968638,-0.  
495316238695472,0.62037691003485,NA  
"15571","DLGAP3",0.226144331583469,0.885845475851209,3.33280882803988,  
0.265795466094045,0.790396735192843,NA  
"15572","AL590434.1",0.205372544040962,0.695830627438559,3.33747149429  
751,0.208490358233014,0.834846110249776,NA  
"15573","AC004865.2",1.97816537723635,-0.696967730517225,0.99560721105  
1616,-0.700042871104809,0.483900531505672,NA  
"15574","AL139286.3",0.857972143732977,0.611371391372451,1.76500280791  
917,0.346385506373907,0.729053015967862,NA  
"15575","AL139286.2",0.473094938280113,1.94288269051029,2.281308680968  
37,0.851652696857129,0.394406882262211,NA  
"15576","TEKT2",0.244351032334407,-0.774664026145693,3.30062972833046,  
-0.234701887187309,0.814440122883676,NA  
"15577","AL591845.1",0.621599531372288,2.26195232335986,1.932056420677  
74,1.17074858640329,0.2416998493121,NA  
"15578","AL929472.2",0.221906102043421,0.695830468846429,3.33747149841  
039,0.208490310457437,0.834846147549618,NA  
"15579","AL442071.2",0.37209959990264,0.409277752655724,2.562639076400  
71,0.159709479350703,0.873109933317219,NA  
"15580","BMP8A",1.96038796150412,3.07726130724391,1.71351547543621,1.7  
9587599374352,0.0725142411852532,NA  
"15581","PABPC4-AS1",0,NA,NA,NA,NA,NA  
"15582","HEYL",0.938108402948588,1.99335009475633,1.60009411765212,1.2  
4577052859943,0.212848652213326,NA

"15583", "HPCAL4", 0, NA, NA, NA, NA, NA  
"15584", "OXCT2", 0.302935778684673, 1.24376146070571, 3.12847474347089, 0.397561611549346, 0.690953362451962, NA  
"15585", "AL033527.4", 0.275489739162904, -0.333877366261583, 3.20869724067456, -0.104053870221608, 0.917126598293383, NA  
"15586", "MYCL", 0.567201673355407, -1.42775860435217, 1.85112772890263, -0.771291241581995, 0.440534322586199, NA  
"15587", "MFSD2A", 1.05665798389887, -0.794657512640741, 1.29938684838476, -0.611563456740049, 0.540826622050684, NA  
"15588", "AL031985.3", 1.07571392438411, 1.40972506044708, 1.60034182441303, 0.880889969219005, 0.378377377165009, NA  
"15589", "AL603839.2", 0, NA, NA, NA, NA, NA  
"15590", "RIMS3", 0.605160956143808, -0.0391432738249548, 2.01725787708008, -0.0194041992695617, 0.984518660507438, NA  
"15591", "KCNQ4", 1.0636522115217, 1.21277054648301, 1.47947499838569, 0.819730342051276, 0.412369848806259, NA  
"15592", "SLFNL1-  
AS1", 1.12837058808307, -0.0759367868709002, 1.40833800980199, -0.0539194329361151, 0.956999353942529, NA  
"15593", "SLFNL1", 0.828263788430103, -0.491056259684204, 1.87333965262632, -0.262128791752084, 0.793222150035673, NA  
"15594", "AC093151.2", 0.892100105243253, 0.45410311552854, 1.50989648598449, 0.300751157277152, 0.763604255763082, NA  
"15595", "EDN2", 0, NA, NA, NA, NA, NA  
"15596", "RIMKLA", 0, NA, NA, NA, NA, NA  
"15597", "AC098484.4", 0.796190616132562, -1.08858648285374, 1.69498447729603, -0.642239794779915, 0.520717498248407, NA  
"15598", "AC098484.2", 0.721942411571629, -0.513517873086733, 1.75714301530339, -0.292245917728028, 0.770098605956844, NA  
"15599", "TMEM269", 0.767385890225299, 0.191740252801486, 1.89148073852936, 0.101370449561419, 0.919256393446812, NA  
"15600", "SLC2A1-  
AS1", 0.700517427143603, 2.49002744851278, 2.12729313451281, 1.17051449474218, 0.24179398453585, NA  
"15601", "TIE1", 1.87106540052227, -0.67522923700343, 1.37762417365747, -0.490140380747499, 0.624034565361461, NA  
"15602", "AL139289.2", 1.26656862635967, -0.361220069740563, 1.4665092420704, -0.24631284916459, 0.805440064108653, NA  
"15603", "CDC20", 0.769705660213809, -1.74478044762802, 1.74023459483089, -1.00261220688902, 0.31604800379142, NA  
"15604", "AL139289.1", 0, NA, NA, NA, NA, NA  
"15605", "SZT2-  
AS1", 0.284240190223044, 0.69583062743856, 3.33747149429751, 0.208490358233014, 0.834846110249776, NA  
"15606", "HYI-  
AS1", 0.268005543297635, -0.150415693622294, 2.77274999608506, -0.0542478383679276, 0.956737707263394, NA  
"15607", "AL451062.1", 1.41969340447111, 0.33547428721514, 1.53350461622719, 0.218763141411658, 0.826834560294508, NA  
"15608", "ARTN", 0.312297045601491, 1.32499568071923, 3.05012201583773, 0.4

34407434797427,0.663992599764673,NA  
"15609","AL357079.1",1.36495959334706,-0.474668129054523,1.42510525391  
227,-0.333075839662678,0.739077036287248,NA  
"15610","ERI3-IT1",0,NA,NA,NA,NA,NA  
"15611","KIF2C",0.520455840138209,1.06350316989514,2.02880066843193,0.  
524202888161075,0.60013743231107,NA  
"15612","AL592166.1",0,NA,NA,NA,NA,NA  
"15613","BEST4",1.15401675151453,0.713639336182654,1.2940817600837,0.5  
51463870518116,0.581315727224257,NA  
"15614","TCTEX1D4",0.94931796096864,-0.726388017662717,1.5026738386884  
6,-0.48339699471757,0.628813881652869,NA  
"15615","LINC01144",0.660340002325551,1.18437385453593,2.0113076209572  
9,0.588857637785025,0.555956777280083,NA  
"15616","HPDL",0.362764736551061,1.46681914601225,2.23095446981539,0.6  
57485020809783,0.510869099430787,NA  
"15617","TSPAN1",1.20271431722475,-2.72427831310251,1.48779411242277,-  
1.8310855583816,0.0670877737151732,NA  
"15618","RAD54L",0,NA,NA,NA,NA,NA  
"15619","TMEM275",0,NA,NA,NA,NA,NA  
"15620","MKNK1-  
AS1",0.380559755157402,1.49425147940121,2.95269759084475,0.50606316205  
0306,0.612812310059885,NA  
"15621","TEX38",0,NA,NA,NA,NA,NA  
"15622","CYP4A22-  
AS1",0.792847424025729,1.67576347883257,1.89743998158755,0.88317074326  
1397,0.37714402635372,NA  
"15623","CYP4A22",0.203509424658842,-0.774663427007579,3.3524751975373  
8,-0.231072082972194,0.817258802814834,NA  
"15624","PDZK1IP1",0.0644961186387932,-0.0533240139618838,3.3524751975  
3738,-0.015905863822961,0.987309491940711,NA  
"15625","TAL1",0.204461874445769,-1.96013641505178,3.33548947920397,-0  
.587660799793491,0.556759992345141,NA  
"15626","STIL",1.81340522701114,-0.44119568561017,1.21678348418765,-0.  
362591776880273,0.716909853928744,NA  
"15627","SLC5A9",0,NA,NA,NA,NA,NA  
"15628","AL109659.2",1.35757425316657,-1.3657235206921,1.3200026355969  
4,-1.0346369650046,0.300838484150528,NA  
"15629","AGBL4",0.167182390659274,0.576034712544328,3.34068880739852,0  
.172429922616139,0.863099549623161,NA  
"15630","DMRTA2",0,NA,NA,NA,NA,NA  
"15631","LINC01562",1.10393656944753,0.832095435118924,1.5501623191939  
6,0.536779551932078,0.591419897791629,NA  
"15632","TTC39A",1.43715706557088,0.461506051180293,1.39052471125418,0  
.331893455359049,0.739969712427517,NA  
"15633","TTC39A-  
AS1",0.167182390659274,0.576034712544328,3.34068880739852,0.1724299226  
16139,0.863099549623161,NA  
"15634","AC104170.2",0.195582345891787,0.494635591052761,3.34300496985  
029,0.147961368742719,0.882373255878367,NA  
"15635","AC104170.1",0.155693188003149,-0.774663427007578,3.3524751975

3738,-0.231072082972193,0.817258802814835,NA  
"15636","AL050343.3",1.09488795070845,0.234942941196245,1.455823241551  
77,0.16138150188193,0.871792935063535,NA  
"15637","RAB3B",0.949923458971979,0.175218939741067,1.47801312512477,0  
.118550327302591,0.905631620786316,NA  
"15638","AL513218.1",0.593542675993841,2.12857656766778,2.290568643031  
26,0.929278663681914,0.352744689640075,NA  
"15639","ORC1",0.663976573087361,0.108456413585284,1.83558994298634,0.  
0590853169574653,0.952884153579528,NA  
"15640","AL445183.1",0.733809023370415,-1.52661665986802,1.81084514448  
769,-0.843040977035022,0.399205526801777,NA  
"15641","AL606760.2",0.748959734429773,0.170786021892052,1.69751024391  
486,0.100609715024858,0.919860284367734,NA  
"15642","AL606760.3",1.40061073626438,-0.477576986547089,1.20753257831  
034,-0.395498221021372,0.692475234256767,NA  
"15643","LINC01771",0,NA,NA,NA,NA,NA  
"15644","LINC02812",0,NA,NA,NA,NA,NA  
"15645","GLIS1",0.172682080803205,0.494635591052761,3.34300496985029,0  
.147961368742719,0.882373255878367,NA  
"15646","DI01",0.156148522800746,0.494635591052761,3.34300496985029,0.  
147961368742719,0.882373255878367,NA  
"15647","SSBP3-  
AS1",0.83989931506687,0.251764666598829,1.69208942051702,0.14878922091  
5938,0.881719956422429,NA  
"15648","FAM151A",0.155693188003149,-0.774663427007578,3.3524751975373  
8,-0.231072082972193,0.817258802814835,NA  
"15649","MROH7",0.221450767245824,-0.774663427007578,3.35247519753738,  
-0.231072082972194,0.817258802814834,NA  
"15650","TTC22",0.102686272020481,-0.0533240139618846,3.35247519753738  
, -0.0159058638229612,0.987309491940711,NA  
"15651","LEXM",0,NA,NA,NA,NA,NA  
"15652","TMEM61",0.532091366774976,2.1203555181467,2.23641577107945,0.  
948104348738011,0.343076334613843,NA  
"15653","MIR4422HG",0,NA,NA,NA,NA,NA  
"15654","LINC01767",0.102686272020481,-0.0533240139618846,3.3524751975  
3738,-0.0159058638229612,0.987309491940711,NA  
"15655","TACSTD2",2.21204951149255,-1.0263133699256,1.05949436673545,-  
0.968682233854547,0.33270375944375,NA  
"15656","AL136985.3",0.102686272020481,-0.0533240139618846,3.352475197  
53738,-0.0159058638229612,0.987309491940711,NA  
"15657","AL136985.2",0.203054089861245,-1.95461545718866,3.33573296423  
696,-0.585962808817275,0.557900507779092,NA  
"15658","AC093424.1",2.12894951802075,0.132059225165822,1.105774404254  
32,0.119426914439095,0.904937139245032,NA  
"15659","H00K1",0.204917209243366,-0.774663427007578,3.35247519753738,  
-0.231072082972194,0.817258802814834,NA  
"15660","AC099792.1",0,NA,NA,NA,NA,NA  
"15661","NFIA-  
AS1",1.07511226560587,0.782036602129108,1.77122616592635,0.44152272429  
8793,0.658834613953333,NA

"15662","AC099791.4",0.479024101463169,0.886663367987631,2.07888309986  
113,0.426509488699418,0.669736635334904,NA  
"15663","L1TD1",0.618903882618642,1.29957250039615,1.9934577018339,0.6  
51918773696876,0.51445357321842,NA  
"15664","ANGPTL3",0.270796174825259,-2.10201442494854,3.17084321545501  
, -0.662919697417743,0.507381985665671,NA  
"15665","AC103923.1",0.819683712759939,-0.41366848839902,1.84621070470  
723,-0.224063530421692,0.822707869532624,NA  
"15666","DNAJC6",0.489482928677431,0.405462049251573,2.38477451752876,  
0.170021126220242,0.864993522216747,NA  
"15667","AL139147.1",0.168565237602375,-1.35173207482145,3.35247519753  
738,-0.40320419844251,0.686798011343181,NA  
"15668","TCTEX1D1",0,NA,NA,NA,NA,NA  
"15669","IL23R",0.156148522800746,0.494635591052761,3.34300496985029,0  
.147961368742719,0.882373255878367,NA  
"15670","IL12RB2",0.699994596269974,-1.36183499001207,1.72388286908074  
, -0.78998116080721,0.429538770640143,NA  
"15671","DEPDC1",0.538662540889147,0.0325006829933678,2.09584401413129  
, 0.015507205104116,0.987627536342964,NA  
"15672","LRRC7",0.165319271277154,-0.774663427007578,3.35247519753738,  
-0.231072082972193,0.817258802814835,NA  
"15673","AL353771.1",0,NA,NA,NA,NA,NA  
"15674","AL354872.2",0.81248831292643,1.68104394447359,1.7499776004738  
5,0.960608835232179,0.336748884601901,NA  
"15675","AL031429.1",0.963686193694558,-3.28060944727923,1.91801176918  
261,-1.71042195881692,0.0871878733010214,NA  
"15676","AL031429.2",0.142120095111522,-0.0533240139618842,3.352475197  
53738,-0.0159058638229611,0.987309491940711,NA  
"15677","ZRBAN2-  
AS1",0.362163077772823,-0.055843711240554,2.5915710022774,-0.021548208  
0913392,0.982808347881005,NA  
"15678","NEGR1-IT1",0,NA,NA,NA,NA,NA  
"15679","LRRIQ3",1.03237582966993,0.656000641556894,1.69749157713551,0  
.386452958231396,0.699161235511333,NA  
"15680","AC105271.1",0.378036833949638,1.57816511636365,2.443262166767  
48,0.645925409818635,0.518327662756108,NA  
"15681","ERICH3",0.128992237277586,0.513744972953418,3.34245151459318,  
0.153703044220807,0.877843884367224,NA  
"15682","AC135803.1",1.75610595594819,1.45994885648468,1.2207634098769  
2,1.19593104173386,0.231723470292331,NA  
"15683","LHX8",0,NA,NA,NA,NA,NA  
"15684","SLC44A5",1.67966412007125,0.490693903336841,1.58882503333498,  
0.308840742713414,0.757442674925092,NA  
"15685","ST6GALNAC3",0,NA,NA,NA,NA,NA  
"15686","AC093433.2",0.193488355916379,0.860398995964988,3.33340328940  
337,0.258114281791264,0.796318709677277,NA  
"15687","AC093575.1",0,NA,NA,NA,NA,NA  
"15688","AC096531.2",0.505523547776327,-3.00137143189983,2.57173918032  
013,-1.16705902949545,0.24318653187626,NA  
"15689","LINC01781",0.309302485770796,1.17088912763199,2.6618389491026

3,0.439879778611974,0.660024182340411,NA  
"15690","LINC01725",0.627876785024713,-1.41975607657452,1.989153746108  
7,-0.713748788575005,0.475382531722742,NA  
"15691","TTLL7-  
IT1",1.11126913618324,0.358001360216399,1.34976531950164,0.26523230004  
7967,0.79083051382488,NA  
"15692","DNASE2B",1.05607144916154,-2.46071779388004,1.76920679578663,  
-1.39085933862579,0.164268085031358,NA  
"15693","AL359762.1",1.84417132918356,-0.919869767369912,1.46992542172  
203,-0.625793495218469,0.531450398950271,NA  
"15694","LPAR3",0.219614265997676,-1.35173207482145,3.35247519753738,-  
0.40320419844251,0.686798011343181,NA  
"15695","AL360219.1",0.849673402814065,-0.538900907285795,1.7409177724  
1491,-0.309549891341657,0.756903266574559,NA  
"15696","AC092807.2",0.297813283114671,-0.22601258613788,2.68166806192  
223,-0.0842805973442787,0.932833338585223,NA  
"15697","LINC02795",0.536829664297366,0.741943666966457,2.071899161747  
1,0.358098347962467,0.720269715326313,NA  
"15698","CLCA4-  
AS1",1.28564139425395,0.997954405785614,1.40833099218638,0.70860785662  
0643,0.478567859437644,NA  
"15699","AL121989.1",0,NA,NA,NA,NA,NA  
"15700","LINC02801",0,NA,NA,NA,NA,NA  
"15701","PKN2-  
AS1",0.673870366681226,-0.93221302514625,1.93010375512878,-0.482985965  
220326,0.6291057014913,NA  
"15702","GBP7",0.700571317406789,-1.62482876266137,1.92788135819891,-0  
.842805370647567,0.399337303850669,NA  
"15703","GBP6",0.258834794821227,1.09609913055011,3.27112624850828,0.3  
35083102050849,0.737562399373167,NA  
"15704","AC099568.1",0.626118881094856,1.41412238710867,2.192112242360  
66,0.645095793811093,0.518865109467947,NA  
"15705","AC099568.2",0.796870739290713,-1.11655482807898,1.74943056347  
982,-0.638239008387978,0.523318108027411,NA  
"15706","LINC01763",0.351730868692533,1.42565098196998,2.5401900302629  
9,0.561237925110027,0.574635352232741,NA  
"15707","BRDT",0,NA,NA,NA,NA,NA  
"15708","EPHX4",0.531455976801571,-0.548448827074067,2.07372297825221,  
-0.264475454448749,0.791413576162138,NA  
"15709","AC104836.1",1.13537399132876,3.09650946109914,1.9999758072738  
9,1.54827345902744,0.121556471703469,NA  
"15710","GFI1",2.01194363627358,-0.249188165039233,1.05225728753799,-0  
.23681296199171,0.81280189533543,NA  
"15711","AC093577.1",0.594127088285279,-0.0669832411982057,1.851443120  
84111,-0.0361789354715771,0.971139682050546,NA  
"15712","AL049796.1",0.698474252585674,0.162818544639544,1.76123811159  
036,0.0924455038578076,0.92634408733918,NA  
"15713","ABCA4",0.0534622507802646,-0.0533240139618838,3.3524751975373  
8,-0.015905863822961,0.987309491940711,NA  
"15714","ARHGAP29-

AS1",1.91252881002651,-0.396355283272311,1.1541605160428,-0.3434143498  
78532,0.731286765576927,NA  
"15715","AC118469.2",0.333884508879529,-1.5113465063233,2.584244266864  
41,-0.58483113446435,0.558661267333854,NA  
"15716","AC092802.4",0,NA,NA,NA,NA,NA  
"15717","DPYD-  
AS1",0.512811910429638,0.896679482292354,2.11836189794499,0.4232890910  
48237,0.672084352498009,NA  
"15718","DPYD-  
IT1",1.3837953017039,0.675047018815108,1.37123125469924,0.492292614029  
695,0.6225125007409,NA  
"15719","PLPPR5",0.954720642981483,2.90004056625135,1.99774167277724,1  
.45165944414612,0.146596321248994,NA  
"15720","LRRC39",0.995870313129785,0.30279217268156,1.48037161049892,0  
.204537948805647,0.837933139901965,NA  
"15721","AL445928.2",1.02112023315527,2.07124790967447,1.6739958173896  
2,1.2373076970433,0.215972871412208,NA  
"15722","GPR88",0,NA,NA,NA,NA,NA  
"15723","AC093157.2",0.517856265775972,-0.238521814235107,1.9432285801  
3899,-0.122745114328262,0.902308937887642,NA  
"15724","AL109741.1",0.11921983002294,-0.0533240139618846,3.3524751975  
3738,-0.0159058638229612,0.987309491940711,NA  
"15725","COL11A1",2.07472517235168,0.160806301640616,1.55191494128542,  
0.103617986632324,0.917472513231124,NA  
"15726","VAV3-AS1",0,NA,NA,NA,NA,NA  
"15727","LINC02785",0.155693188003149,-0.774663427007578,3.35247519753  
738,-0.231072082972193,0.817258802814835,NA  
"15728","AL160171.1",0.155693188003149,-0.774663427007578,3.3524751975  
3738,-0.231072082972193,0.817258802814835,NA  
"15729","FNDC7",0,NA,NA,NA,NA,NA  
"15730","SPATA42",0.182454488057851,0.814003878402388,3.33451052748657  
,0.244114952312343,0.80714179253596,NA  
"15731","AL356488.2",1.43083291691937,1.71740447805871,1.3913969955749  
4,1.23430227571324,0.217090288255334,NA  
"15732","KIAA1324",1.49536421080977,-0.836921264012715,1.1907283133634  
6,-0.702865006752595,0.482139880580005,NA  
"15733","CELSR2",1.54255546537063,0.196750542026584,1.26859848117815,0  
.155092840599858,0.876748126266658,NA  
"15734","SYPL2",1.28022273829636,1.54800539243345,1.45336329438663,1.0  
651193672032,0.286821916088735,NA  
"15735","GNAT2",0.0644961186387932,-0.0533240139618838,3.3524751975373  
8,-0.015905863822961,0.987309491940711,NA  
"15736","AC000032.1",0.983727571763782,-0.209303721964489,1.3513273094  
4746,-0.154887509858785,0.8769100005036,NA  
"15737","ALX3",1.86176646646686,1.02780322731956,1.2670575677039,0.811  
173267511509,0.417266175034448,NA  
"15738","UBL4B",0.563153420449001,0.845131521674386,2.06534492446433,0  
.409196309857822,0.682395602238133,NA  
"15739","RBM15-  
AS1",0.11921983002294,-0.0533240139618846,3.35247519753738,-0.01590586

38229612,0.987309491940711,NA  
"15740","AL365361.1",2.22525256456104,0.687143734267363,1.089400908442  
29,0.630753773879162,0.528201532770674,NA  
"15741","KCNA3",0.523957614698141,0.975101415462914,2.08106990456499,0  
.468557742017196,0.639385788682183,NA  
"15742","AL360270.2",0.634406850610506,0.378594911230237,1.81193144713  
381,0.208945493952938,0.834490788856604,NA  
"15743","AL360270.1",0.481382907795763,0.732552488271384,2.44638770409  
598,0.2994425156098,0.764602426668835,NA  
"15744","AL360270.3",1.7979284369301,-1.79607550817325,1.1559811605917  
2,-1.55372385762228,0.120250299718156,NA  
"15745","AL355816.1",0.142120095111522,-0.0533240139618842,3.352475197  
53738,-0.0159058638229611,0.987309491940711,NA  
"15746","AL355816.2",1.6248077163867,1.13430908054648,1.27945230872584  
,0.886558313123916,0.375316745962281,NA  
"15747","AL390195.1",0.262617689563678,-0.0044714060693364,3.291379923  
03141,-0.00135852018724662,0.998916058050473,NA  
"15748","TMIGD3",1.38050278319598,-1.97863217485623,1.36288801864639,-  
1.45179365273267,0.146558989323641,NA  
"15749","ADORA3",0,NA,NA,NA,NA,NA  
"15750","LINC01160",0.102686272020481,-0.0533240139618846,3.3524751975  
3738,-0.0159058638229612,0.987309491940711,NA  
"15751","INKA2-  
AS1",0.715293311802522,-1.02209367992566,1.78416657064663,-0.572868978  
009843,0.566733410563588,NA  
"15752","AL049557.1",0.464970736132523,-0.953144535949503,2.1332181437  
1253,-0.446810626826334,0.655011797800086,NA  
"15753","AL354760.1",0.729894427980107,-0.042946622474472,1.7563195912  
8327,-0.0244526239345157,0.98049157302585,NA  
"15754","AL603832.1",0.410289753284328,0.547543542914136,2.92149338898  
395,0.18741905936832,0.85133208015149,NA  
"15755","PPM1J",2.09342678633684,0.836545626105775,1.08427671520242,0.  
771524108538663,0.440396338131055,NA  
"15756","TAFA3",0.269388390240736,-2.09481427187859,3.17548848369632,-  
0.659682528415343,0.509457580965155,NA  
"15757","AL390242.1",0.67162967841879,1.3516220468258,2.03544777088786  
,0.664041625708837,0.506663669728473,NA  
"15758","AL137856.1",0,NA,NA,NA,NA,NA  
"15759","AP4B1-  
AS1",1.26967522202779,1.36717705162911,1.55723662347701,0.877950743655  
43,0.379970449785316,NA  
"15760","BCL2L15",0.744010147288686,-0.43308392996085,1.75763416650217  
, -0.246401633636151,0.80537134175914,NA  
"15761","AMPD1",0.100823152638361,-1.35173207482145,3.35247519753738,-  
0.40320419844251,0.686798011343181,NA  
"15762","TSPAN2",2.24891536897063,-2.25167214438416,1.07979885524373,-  
2.0852699865809,0.0370448001946164,NA  
"15763","LINC01765",0.219614265997676,-1.35173207482145,3.352475197537  
38,-0.40320419844251,0.686798011343181,NA  
"15764","CASQ2",0.0534622507802646,-0.0533240139618838,3.3524751975373



8,-0.015905863822961,0.987309491940711,NA  
"15765","MAB21L3",1.41946712947843,0.162766250216028,1.32086764036032,  
0.123226767953545,0.901927529340454,NA  
"15766","LINC01779",1.43260250836565,-0.334846586232999,1.252889796968  
11,-0.267259408643361,0.789269437552959,NA  
"15767","LINC01762",0.204461874445769,-1.96013641505178,3.335489479203  
97,-0.587660799793491,0.556759992345141,NA  
"15768","AL390066.1",0.414527982824376,0.61066848644143,2.453830896228  
2,0.248863313026212,0.803466514579085,NA  
"15769","AL157904.1",1.37375870065289,-1.03260162926247,1.390729940078  
89,-0.742488961734649,0.457791137209204,NA  
"15770","CD101",1.50268193964397,-1.03851283613766,1.16473514207959,-0  
.891630035549055,0.372591265616885,NA  
"15771","AL445231.1",0.417609834274426,0.175713628377686,2.43690601757  
665,0.0721052133772571,0.942518177352526,NA  
"15772","AL358072.1",0.425397735807734,0.605016634891276,2.16395509345  
9,0.279588350386782,0.779793345844935,NA  
"15773","AL157902.1",0,NA,NA,NA,NA,NA  
"15774","AL139420.2",1.7072719973378,1.63021586259385,1.47407683859753  
,1.10592325983826,0.268759736257601,NA  
"15775","AL359915.1",0.49131942992558,0.845567594182551,2.130193093050  
47,0.396944106588801,0.691408678058255,NA  
"15776","HA02",0.154285403418625,-0.774663427007578,3.35247519753738,-  
0.231072082972193,0.817258802814835,NA  
"15777","HSD3B2",0.409379083689134,-1.78470406805556,2.82546474996282,  
-0.631649737650787,0.527615778260201,NA  
"15778","ADAM30",0,NA,NA,NA,NA,NA  
"15779","AC245008.1",0.268005543297635,-0.150415693622294,2.7727499960  
8506,-0.0542478383679276,0.956737707263394,NA  
"15780","FCGR1B",0.851019157576901,-1.04181277285866,1.71702935517684,  
-0.6067530352452,0.544014820047089,NA  
"15781","LINC02798",1.0835723618303,0.378699032796003,1.97282925253016  
,0.191957328446098,0.847775630730321,NA  
"15782","AL592494.1",0,NA,NA,NA,NA,NA  
"15783","AL592494.2",0.558448362018292,-1.79602275615255,2.64086766675  
917,-0.680088131169632,0.496448659172799,NA  
"15784","AC239800.2",1.63642731234546,-1.46860109858336,1.085875883962  
81,-1.35245760613435,0.17622897185148,NA  
"15785","FAM72C",0.442095408685363,0.693931517896884,1.96769736575265,  
0.352661710065081,0.724342068163414,NA  
"15786","AC246785.3",0.744265955523396,-0.152784886352397,1.7780684656  
7062,-0.0859274484094584,0.931524091527365,NA  
"15787","FP700111.1",0.642711338520222,-2.39729897535534,1.90700735243  
388,-1.25710001710047,0.208717420978706,NA  
"15788","PDZK1",2.05708015369457,0.0970746070870282,1.01388910239881,0  
.0957447977864189,0.923723260819204,NA  
"15789","CD160",1.85062310867151,0.788615132560643,1.14847522350121,0.  
686662730221112,0.492295288174765,NA  
"15790","ITGA10",0.860134174192147,0.705669694441825,1.73915495396171,  
0.405754353764938,0.684923100802983,NA

"15791","ANKRD34A",0.682387202141369,0.536148038604374,2.00034242000856,0.268028130204867,0.788677665889944,NA  
"15792","AC239799.1",1.79605176981504,0.606216066052044,1.07504327220399,0.563899223153328,0.572822718777857,NA  
"15793","LINC00624",0.94521840054127,-1.38528639592171,1.68569993802402,-0.821787059887746,0.411198099698764,NA  
"15794","AC239803.1",0.939596332405573,0.492527880011393,1.93426467215918,0.254633136354393,0.799006463472466,NA  
"15795","LINC02804",0.440258907437215,0.231940583716098,2.16067209960437,0.107346498230142,0.914514097374778,NA  
"15796","LINC02805",0.102686272020481,-0.0533240139618846,3.35247519753738,-0.0159058638229612,0.987309491940711,NA  
"15797","LINC01731",0.559036577248171,-1.04308014632551,2.34198823881235,-0.445382316204316,0.656043489529887,NA  
"15798","AC245100.6",1.00125029742705,0.588576936718592,1.59334837687201,0.36939626340478,0.711832382726508,NA  
"15799","PPIAL4G",0.386926462243525,1.51070939514628,2.94063395657504,0.513735955394397,0.607436610092053,NA  
"15800","NUDT4B",1.0107199569805,-0.730461255579624,1.48464313486781,-0.492011338229548,0.622711328226899,NA  
"15801","AC239802.2",0.102686272020481,-0.0533240139618846,3.35247519753738,-0.0159058638229612,0.987309491940711,NA  
"15802","AC239804.1",0.839600403989821,0.860857480124555,1.73759420091915,0.495430682071324,0.620296141184078,NA  
"15803","AC243772.2",1.0461647378085,2.16026995294862,1.53948492110342,1.40324203461523,0.160544676835167,NA  
"15804","HIST2H3D",0.438294723048383,1.76325634544046,2.40772808339573,0.732332009415971,0.463965946529121,NA  
"15805","HIST2H4A",0.41353133857768,0.614206680598069,2.48673302608403,0.246993414313272,0.804913320826333,NA  
"15806","AC242988.2",0.102686272020481,-0.0533240139618846,3.35247519753738,-0.0159058638229612,0.987309491940711,NA  
"15807","AL356356.1",1.18004159658911,1.35112439304943,1.37843804743792,0.980185069296907,0.326994773221943,NA  
"15808","HORMAD1",0.541914804015833,-1.80012731222464,2.66414887485842,-0.675685705559643,0.499240213473887,NA  
"15809","ANXA9",1.57121127898799,0.552435071893952,1.23274784015303,0.448133068175056,0.654057163938574,NA  
"15810","BNIPL",1.07549850198798,-0.12687668338143,1.42796335257186,-0.0888514982915469,0.92919992978043,NA  
"15811","AL592424.1",0.964640837058796,0.67832136723642,1.67513620163436,0.404935053385277,0.685525251198272,NA  
"15812","TNFAIP8L2",1.77628845266098,-2.56942218662681,1.30579986488225,-1.96769984109205,0.049102584133932,NA  
"15813","TMOD4",0.100823152638361,-1.35173207482145,3.35247519753738,-0.40320419844251,0.686798011343181,NA  
"15814","CGN",0.0644961186387932,-0.0533240139618838,3.35247519753738,-0.015905863822961,0.987309491940711,NA  
"15815","AL391335.1",0.388179503600051,-2.37645961319578,2.86395305033592,-0.829783020680815,0.406661472415033,NA

"15816", "AL589765.5", 0.142120095111522, -0.0533240139618842, 3.35247519753738, -0.0159058638229611, 0.987309491940711, NA  
"15817", "TDRKH-AS1", 0.380559755157402, 1.49425147940121, 2.95269759084475, 0.506063162050306, 0.612812310059885, NA  
"15818", "LING04", 0, NA, NA, NA, NA, NA  
"15819", "RORC", 0.155693188003149, -0.774663427007578, 3.35247519753738, -0.231072082972193, 0.817258802814835, NA  
"15820", "C2CD4D", 0.11921983002294, -0.0533240139618846, 3.35247519753738, -0.0159058638229612, 0.987309491940711, NA  
"15821", "C2CD4D-AS1", 0.142120095111522, -0.0533240139618842, 3.35247519753738, -0.0159058638229611, 0.987309491940711, NA  
"15822", "AL450992.2", 0.581797665103006, 0.890341464216116, 2.28794546315692, 0.389144531001023, 0.697169233531181, NA  
"15823", "AL450992.1", 0, NA, NA, NA, NA, NA  
"15824", "AL589986.2", 0.166727055861678, -0.774663427007578, 3.35247519753738, -0.231072082972193, 0.817258802814835, NA  
"15825", "HRNR", 1.19941093854582, 0.427694712104334, 1.55873070627347, 0.274386531543247, 0.783787592251238, NA  
"15826", "FLG", 0, NA, NA, NA, NA, NA  
"15827", "FLG2", 0.572804441364428, 2.13970439276979, 2.21299260915756, 0.966882755918616, 0.333602647967332, NA  
"15828", "SPRR2D", 0.11921983002294, -0.0533240139618846, 3.35247519753738, -0.0159058638229612, 0.987309491940711, NA  
"15829", "SPRR2A", 0.287785067625315, -0.774666036310719, 3.12039593109626, -0.248258891953677, 0.803934102976972, NA  
"15830", "SPRR2B", 0.937091202092338, 0.555446476300087, 1.8780443990384, 0.295757904650437, 0.767414972703242, NA  
"15831", "SPRR2E", 0.341125932066361, 1.37790492328387, 3.03290540471936, 0.454318463457443, 0.649599628836418, NA  
"15832", "LOR", 0.242943247749883, -0.774663951729422, 3.30711343151841, -0.234241724020258, 0.814797324817481, NA  
"15833", "S100A12", 1.95740436109711, 0.151960712875876, 1.01849171108904, 0.149201717816035, 0.881394464545291, NA  
"15834", "S100A7", 0.686746818020636, -0.480064233412545, 1.94578543822942, -0.246720025744145, 0.80512490727118, NA  
"15835", "BX470102.1", 1.14716884787234, -0.900897553060941, 1.32241064456538, -0.681254008929296, 0.495710778893525, NA  
"15836", "S100A5", 1.43724891866808, -0.167559689994054, 1.36347087525835, -0.122892019943078, 0.902192604889675, NA  
"15837", "AL358472.5", 0.219614265997676, -1.35173207482145, 3.35247519753738, -0.40320419844251, 0.686798011343181, NA  
"15838", "AL358472.3", 0.891525064598986, -0.0373622448920701, 1.46730610000822, -0.0254631565232782, 0.979685535787271, NA  
"15839", "NUP210L", 0, NA, NA, NA, NA, NA  
"15840", "C1orf189", 0.792072092439183, -1.17071181864754, 1.64026021793154, -0.713735421885602, 0.475390798630246, NA  
"15841", "AL162591.2", 1.92969775800237, 0.626207474334096, 1.04764165788226, 0.597730597693045, 0.550019705734567, NA

"15842", "UBE2Q1-AS1", 0, NA, NA, NA, NA, NA  
"15843", "CHRNA2", 0.102686272020481, -0.0533240139618846, 3.3524751975373  
8, -0.0159058638229612, 0.987309491940711, NA  
"15844", "KCNA3", 1.42831712479039, -0.685553317618192, 1.16100573474658, -  
0.59048228367953, 0.55486735980671, NA  
"15845", "AL451085.1", 1.83235006323475, -1.13223076018935, 1.077110242682  
6, -1.05117444373147, 0.293178478395413, NA  
"15846", "DCST2", 1.39246596148965, 0.344501080867889, 1.40495976031276, 0.  
245203521552247, 0.806298849806707, NA  
"15847", "DCST1-  
AS1", 1.6791485351972, 1.11577367736074, 1.2659785558761, 0.88135274660208  
3, 0.378126925149819, NA  
"15848", "TRIM46", 0.55990745412378, 1.08891901403085, 1.87058799834173, 0.  
582126590674253, 0.560481415483309, NA  
"15849", "AC234582.1", 1.95058499135848, -0.951853648223689, 1.07942950859  
238, -0.881811772465761, 0.377878604324253, NA  
"15850", "AC234582.2", 0.168565237602375, -1.35173207482145, 3.35247519753  
738, -0.40320419844251, 0.686798011343181, NA  
"15851", "ASH1L-  
IT1", 0.23843966004588, 0.69583062743856, 3.33747149429751, 0.208490358233  
014, 0.834846110249776, NA  
"15852", "AL355388.2", 1.34366186335932, 0.433681321973178, 1.201996628609  
15, 0.360800780676897, 0.718248379161593, NA  
"15853", "PAQR6", 1.22911527634152, 0.158135708575816, 1.30842386869153, 0.  
120859694140216, 0.903802167495147, NA  
"15854", "TSACC", 0.306195696679323, -0.0320258052725539, 3.12823849898919  
, -0.0102376482109348, 0.991831681239967, NA  
"15855", "C1orf61", 1.19066432410982, 1.36712267795839, 1.49127277969944, 0.  
.916748898369841, 0.359274236175292, NA  
"15856", "IQGAP3", 0.221450767245824, -0.774663427007578, 3.35247519753738  
, -0.231072082972194, 0.817258802814834, NA  
"15857", "TTC24", 0, NA, NA, NA, NA, NA  
"15858", "HAPLN2", 0.307439366388676, -0.151735553622885, 2.6698589116342,  
-0.0568327985279224, 0.954678386705447, NA  
"15859", "BCAN", 2.08474040359699, -1.11450251038858, 1.01205275218813, -1.  
10122966216824, 0.270796715051885, NA  
"15860", "NTRK1", 2.18618846253983, 1.79827288608761, 1.28019949546449, 1.4  
0468176441137, 0.160115930711692, NA  
"15861", "INSRR", 0.362309401753464, 0.230443291991928, 2.25634854133181, 0.  
.102131070519765, 0.918652639244649, NA  
"15862", "LRRC71", 0, NA, NA, NA, NA, NA  
"15863", "FCRL5", 0.213849003121058, 0.96816891762709, 3.33094636315095, 0.  
290658813464423, 0.771312274283839, NA  
"15864", "FCRL3", 0.833689031701294, 1.72077075607155, 1.75011234222833, 0.  
983234455612477, 0.325492060483836, NA  
"15865", "AL356276.1", 0, NA, NA, NA, NA, NA  
"15866", "FCRL2", 0, NA, NA, NA, NA, NA  
"15867", "FCRL1", 0.0534622507802646, -0.0533240139618838, 3.3524751975373  
8, -0.015905863822961, 0.987309491940711, NA  
"15868", "KIRREL1-

IT1",0.322729254681782,-0.0522366723701696,2.65678688704254,-0.0196615  
967298446,0.984313326223208,NA  
"15869","CD1D",1.45687679315789,-1.13880864915152,1.17922548071411,-0.  
965725951292953,0.334181330162888,NA  
"15870","AL138899.1",0.273651557422207,0.0572713106177806,2.7582874522  
8977,0.0207633582824144,0.98343442728806,NA  
"15871","CD1A",0,NA,NA,NA,NA,NA  
"15872","CD1B",0.462841334469399,-1.25399534357129,2.39492373119974,-0.  
.52360554419121,0.600552924549524,NA  
"15873","CD1E",1.2321306962297,-1.08661917969217,1.38414477296945,-0.7  
85047345416773,0.432425809942905,NA  
"15874","SPTA1",0.0534622507802646,-0.0533240139618838,3.3524751975373  
8,-0.015905863822961,0.987309491940711,NA  
"15875","AIM2",0.897024754742917,-0.0451760603322506,1.52069705859127,  
-0.0297074687407499,0.976300355358326,NA  
"15876","FCRL6",0.915682173982535,-0.227793768545685,1.85529581642371,  
-0.12278029548128,0.902281078114654,NA  
"15877","SLAMF8",2.04229337983529,-2.45728687017369,1.32356740702527,-  
1.85656344900216,0.0633732881660021,NA  
"15878","AL590560.2",1.51674607637787,0.885285797561202,1.306926795160  
98,0.677379789624836,0.498165017954561,NA  
"15879","VSIG8",1.51783689792051,-1.43021624026846,1.34725369159378,-1  
.06157901009463,0.288426846771441,NA  
"15880","CFAP45",1.10230209035548,-1.6797658682374,1.39410650857694,-1  
.20490497526768,0.228239987726985,NA  
"15881","IGSF9",0.448315791790845,0.611004695004865,2.47222544714815,0  
.247147644123514,0.804793962455449,NA  
"15882","SLAMF9",0.8896243411109,-2.02959952923652,1.82570360675144,-1  
.11168073598095,0.266275445428978,NA  
"15883","KCNJ10",1.27348397052482,-0.379734296554388,1.26848678764674,  
-0.29936007237321,0.764665323645378,NA  
"15884","KCNJ9",0.102686272020481,-0.0533240139618846,3.35247519753738  
, -0.0159058638229612,0.987309491940711,NA  
"15885","ATP1A2",0,NA,NA,NA,NA,NA  
"15886","ATP1A4",0.221450767245824,-0.774663427007578,3.35247519753738  
, -0.231072082972194,0.817258802814834,NA  
"15887","AL121987.2",0.909455421213975,-1.32577976934175,1.50630050294  
288,-0.880156228290141,0.378774682140878,NA  
"15888","NHLH1",0.90115552890486,-0.529830151762229,1.94356569813406,-  
0.272607276548922,0.785155117859169,NA  
"15889","SLAMF6",1.59532436401311,-0.283414432789058,1.25982450204647,  
-0.224963423340851,0.822007728883487,NA  
"15890","SLAMF1",2.15088081492834,0.916850026460695,1.0326746911602,0.  
88784012459008,0.374626756055105,NA  
"15891","AL121985.1",0.389088492702695,1.57791456375365,2.493269790487  
27,0.632869563403832,0.526818825201591,NA  
"15892","LY9",0.709474355563337,-1.60502703880771,2.16107021564283,-0.  
742700087757344,0.457663276616414,NA  
"15893","CD244",1.00430352609433,2.97257147930481,1.52056438253652,1.9  
5491326342008,0.0505933087859853,NA

"15894", "ITLN1", 0, NA, NA, NA, NA, NA  
"15895", "F11R", 1.24044745531629, -2.00701451078626, 1.68034330285288, -1.19440742101852, 0.232318635349334, NA  
"15896", "NECTIN4", 0.271251509622856, -0.774665352300728, 3.18287089738686, -0.243385728568736, 0.8077065984266, NA  
"15897", "AL590714.1", 0.106924501560529, 0.385965786494404, 3.34626872025989, 0.115342137395477, 0.908173940404949, NA  
"15898", "NR1I3", 0.394588182846626, 1.58555090478059, 2.48513843699939, 0.63801311072836, 0.523465145618432, NA  
"15899", "MPZ", 1.51422407928716, 1.27656954238535, 1.30637339780248, 0.977185806548673, 0.328477173444652, NA  
"15900", "CFAP126", 0, NA, NA, NA, NA, NA  
"15901", "FCGR3B", 1.78650767869423, 0.519152717576585, 1.32678226235319, 0.391287050111608, 0.695585069893263, NA  
"15902", "FCRLA", 0.100823152638361, -1.35173207482145, 3.35247519753738, -0.40320419844251, 0.686798011343181, NA  
"15903", "NOS1AP", 0.578690876011532, -0.31293706568785, 1.89703372327304, -0.164961256011794, 0.868974477428428, NA  
"15904", "C1orf226", 0.270796174825259, -2.10201442494854, 3.17084321545501, -0.662919697417743, 0.507381985665671, NA  
"15905", "SH2D1B", 0.973425382838799, 0.997596014160322, 1.43895141806662, 0.693279843666087, 0.488133949820036, NA  
"15906", "AL596325.1", 2.21200133741057, -1.84951992377798, 1.08241031027938, -1.70870501344412, 0.0875056049870058, NA  
"15907", "RGS4", 1.36970597487488, -1.86329294144729, 1.35361766004393, -1.37652824460551, 0.168658149020915, NA  
"15908", "AL499616.1", 0.102686272020481, -0.0533240139618846, 3.35247519753738, -0.0159058638229612, 0.987309491940711, NA  
"15909", "NUF2", 1.94597844358649, 0.946074664509912, 1.13865802805078, 0.830868128273291, 0.406048130363105, NA  
"15910", "AL357568.1", 1.09890980004962, -1.40394849584417, 1.56301836776381, -0.898229045032131, 0.36906345165628, NA  
"15911", "AL356441.1", 1.94513639416679, 0.175110178468113, 1.04772089352728, 0.167134376674099, 0.867264317750483, NA  
"15912", "AL451074.5", 0.160386752340794, 0.715986771710925, 3.33695183420161, 0.214563112470645, 0.830107956063492, NA  
"15913", "TMC01-AS1", 0.723350196156153, -0.523717511742404, 1.64105843411093, -0.319133981372295, 0.749624916437823, NA  
"15914", "AL596087.2", 0.842703898263923, -1.02542863398743, 1.78279131971754, -0.575181527218733, 0.565168534744015, NA  
"15915", "LINC01675", 0.0534622507802646, -0.0533240139618838, 3.35247519753738, -0.015905863822961, 0.987309491940711, NA  
"15916", "ILDR2", 0, NA, NA, NA, NA, NA  
"15917", "GPA33", 0.102686272020481, -0.0533240139618846, 3.35247519753738, -0.0159058638229612, 0.987309491940711, NA  
"15918", "DUSP27", 0.100823152638361, -1.35173207482145, 3.35247519753738, -0.40320419844251, 0.686798011343181, NA  
"15919", "AL451050.2", 0.586617232088785, 0.835130349831921, 2.00890957573881, 0.41571326052582, 0.677619836708347, NA

"15920", "AL136984.1", 0.512976025304809, 0.936381618809862, 2.77607406361731, 0.33730426398989, 0.735887545663924, NA  
"15921", "AL359962.3", 0.256971675439106, -0.226175799809587, 2.79502848435046, -0.0809207494935953, 0.935504978368658, NA  
"15922", "AL359962.2", 0.11921983002294, -0.0533240139618846, 3.35247519753738, -0.0159058638229612, 0.987309491940711, NA  
"15923", "AL031733.2", 0, NA, NA, NA, NA, NA  
"15924", "ADCY10", 0.273505233441565, -0.226106766776126, 2.74490218220006, -0.082373342205914, 0.934349833830783, NA  
"15925", "Z99943.1", 0.544617565830674, 1.03740947538299, 1.87235359000574, 0.554067074146938, 0.579532942722168, NA  
"15926", "AL023755.1", 0.413120198239852, 0.610630740268671, 2.45617295473343, 0.248610644088353, 0.803661974175172, NA  
"15927", "CCDC181", 0.554784958553778, 0.0622611564471181, 1.88383882387263, 0.0330501503940379, 0.973634595232349, NA  
"15928", "F5", 1.4701459922496, -3.67991055942792, 1.69993128602649, -2.16474076903987, 0.0304075430579819, NA  
"15929", "SELP", 0, NA, NA, NA, NA, NA  
"15930", "SELE", 0.306692811668653, -2.34839005368482, 3.32010114242453, -0.707324853353681, 0.479364624090735, NA  
"15931", "LINC01681", 0.997136529071923, -1.91142367307772, 1.67575652223313, -1.14063328873728, 0.254022558404452, NA  
"15932", "BX284613.2", 1.37231015024065, 1.46209960355072, 1.49213867113705, 0.979868447774072, 0.327151059516962, NA  
"15933", "MROH9", 0, NA, NA, NA, NA, NA  
"15934", "AL021026.1", 0.345629519770364, -0.054409187889382, 2.61698850261154, -0.0207907630603215, 0.98341256615796, NA  
"15935", "MYOCOS", 0.269413327882159, -0.15046778595343, 2.76844275514859, -0.0543510555432646, 0.956655473192921, NA  
"15936", "FASLG", 0.978578672628541, -1.49156434101235, 1.4413357303776, -1.03484865432538, 0.300739596729849, NA  
"15937", "ANKRD45", 1.82801918793534, 0.768048239374715, 1.19444032635176, 0.643019347580642, 0.520211545808557, NA  
"15938", "GAS5-AS1", 1.89788789167081, 0.50695601214035, 1.19245532608797, 0.425136272235451, 0.670737337373502, NA  
"15939", "SERPINC1", 0, NA, NA, NA, NA, NA  
"15940", "RC3H1-IT1", 1.78679669233492, -0.607147407763249, 1.17885752197807, -0.515030354766266, 0.606531808538388, NA  
"15941", "RABGAP1L-DT", 1.15045022588528, -0.905834398286242, 1.60402192127174, -0.564726944359998, 0.572259504367878, NA  
"15942", "GPR52", 0.45325066288311, -0.61028385474067, 2.15474811642802, -0.283227468717946, 0.77700247307112, NA  
"15943", "RABGAP1L-IT1", 2.1488959083523, -0.401203200030266, 1.16139755109359, -0.345448636130227, 0.729757118576975, NA  
"15944", "Z99127.1", 0.11921983002294, -0.0533240139618846, 3.35247519753738, -0.0159058638229612, 0.987309491940711, NA

"15945", "TNN", 0.63073600684676, 0.90092384666817, 2.279079558907, 0.395301622160236, 0.692620302389344, NA  
"15946", "TNR", 0, NA, NA, NA, NA, NA  
"15947", "LINC02803", 0.916692228091891, 0.113090001206458, 1.45500508536784, 0.0777248150839746, 0.938046954232061, NA  
"15948", "AL590723.1", 0.5415107767392, 0.0702417634040783, 1.89262582391733, 0.0371133916257641, 0.970394594411954, NA  
"15949", "AL591043.2", 0.432869479777192, -1.22608949904548, 2.41171321006996, -0.508389427866474, 0.611180265515232, NA  
"15950", "ASTN1", 0.479479436260766, 1.92433648503242, 2.30972246837453, 0.833146194567123, 0.40476228343553, NA  
"15951", "CLEC20A", 0.0534622507802646, -0.0533240139618838, 3.35247519753738, -0.015905863822961, 0.987309491940711, NA  
"15952", "TEX35", 2.12038722010363, 1.21105857007619, 1.09875700643185, 1.1022078248302, 0.270371330946469, NA  
"15953", "AL449106.1", 0.106924501560529, 0.385965786494404, 3.34626872025989, 0.115342137395477, 0.908173940404949, NA  
"15954", "AXDND1", 0.267550208500038, -1.3833228396413, 2.75673373075219, -0.501797770386714, 0.615809781659427, NA  
"15955", "AL160286.2", 1.61683336291124, -0.825603120910292, 1.12678413608834, -0.73270744099788, 0.463736884618282, NA  
"15956", "AL353708.3", 1.81482223168591, -0.0975289802016085, 1.19267513312427, -0.0817732989419565, 0.934826989303642, NA  
"15957", "AL353708.1", 2.32383394985985, 0.299742293021733, 1.09387464094008, 0.274018869990563, 0.78407012031963, NA  
"15958", "AL162431.1", 1.37237819072441, 1.55265438186892, 1.46289832765008, 1.06135495032182, 0.288528621866844, NA  
"15959", "KIAA1614-AS1", 0.442095408685363, 0.693931517896884, 1.96769736575265, 0.352661710065081, 0.724342068163414, NA  
"15960", "LINC01732", 0, NA, NA, NA, NA, NA  
"15961", "TEDDM1", 0, NA, NA, NA, NA, NA  
"15962", "RGSL1", 0, NA, NA, NA, NA, NA  
"15963", "AL355999.1", 1.52141659813538, -0.133248064185411, 1.27746207353994, -0.104306865108074, 0.916925830065597, NA  
"15964", "SHCBP1L", 1.9010507773072, 0.621529484904203, 1.27320732446027, 0.488160469205341, 0.62543618243418, NA  
"15965", "AL445228.2", 1.60747134270071, 0.924108506537641, 1.19797356272639, 0.77139307184252, 0.440473980391792, NA  
"15966", "AL713852.1", 2.03378874544442, 1.71000929727492, 1.28134980066446, 1.33453745135651, 0.182027781467976, NA  
"15967", "AL713852.2", 1.29244087487932, 3.30941696805297, 1.79355059495774, 1.84517625393832, 0.0650119035931815, NA  
"15968", "AL078644.2", 0.297557474879961, -0.207493288647577, 3.12446022598217, -0.0664093230959124, 0.947051947833083, NA  
"15969", "OCLM", 0.102686272020481, -0.0533240139618846, 3.35247519753738, -0.0159058638229612, 0.987309491940711, NA  
"15970", "AL096803.4", 0.322729254681782, -0.0522366723701696, 2.65678688704254, -0.0196615967298446, 0.984313326223208, NA  
"15971", "PACERR", 0.782186349000945, 0.048083683185238, 1.97357006400699,



0.0243638085427849,0.980562416349661,NA  
"15972","ERVMER61-1",0.632984190239505,0.281945149292095,1.86776027198  
647,0.150953606584762,0.880012313004837,NA  
"15973","RGS18",1.42767565258425,-2.13763397367293,1.45421639018044,-1  
.46995590759893,0.14157369618535,NA  
"15974","AL390957.1",1.80548599697247,-0.798905186515799,1.14432633684  
787,-0.698144542156077,0.485086804629276,NA  
"15975","AL136987.1",0.168565237602375,-1.35173207482145,3.35247519753  
738,-0.40320419844251,0.686798011343181,NA  
"15976","RGS13",1.88237299736663,0.158547644187828,1.29808665170905,0.  
122139491981591,0.902788545921892,NA  
"15977","B3GALT2",1.10676554847923,1.1047296092113,1.45747227854294,0.  
757976412639368,0.448465103500574,NA  
"15978","LINC01031",0,NA,NA,NA,NA,NA  
"15979","AL138778.1",0.0534622507802646,-0.0533240139618838,3.35247519  
753738,-0.015905863822961,0.987309491940711,NA  
"15980","AL136456.1",0.0534622507802646,-0.0533240139618838,3.35247519  
753738,-0.015905863822961,0.987309491940711,NA  
"15981","CFHR3",1.34665736585148,3.32837573717673,1.67488332587414,1.9  
872284151134,0.0468970903310933,NA  
"15982","CFHR1",0.220189306641942,-0.267602342861375,2.93506496557825,  
-0.0911742486111047,0.927354136344172,NA  
"15983","ASPM",1.28823824620949,-2.74983184695231,1.6137524618777,-1.7  
03998544952,0.0883813590757661,NA  
"15984","CRB1",1.09630672126497,1.40071524868976,1.47282735601268,0.95  
1038316182456,0.341584925573029,NA  
"15985","AL450352.1",0,NA,NA,NA,NA,NA  
"15986","AL157402.2",0.142120095111522,-0.0533240139618842,3.352475197  
53738,-0.0159058638229611,0.987309491940711,NA  
"15987","MIR181A1HG",1.80975656335452,0.177374815555825,1.105584677175  
93,0.160435305605813,0.87253817995772,NA  
"15988","NR5A2",0,NA,NA,NA,NA,NA  
"15989","LINC00862",0.156148522800746,0.494635591052761,3.343004969850  
29,0.147961368742719,0.882373255878367,NA  
"15990","AL359834.1",0,NA,NA,NA,NA,NA  
"15991","KIF14",1.23937017525271,-1.2806093999731,1.32843709441285,-0.  
963997019775417,0.335047420027023,NA  
"15992","DDX59-  
AS1",0.730668272497458,2.57215377853561,2.00978913957091,1.27981275641  
92,0.200610996405684,NA  
"15993","INAVA",1.03881398732745,2.11596473666169,1.66124881501914,1.2  
7371933543701,0.202762901447626,NA  
"15994","AL358473.1",0,NA,NA,NA,NA,NA  
"15995","ASCL5",0.100823152638361,-1.35173207482145,3.35247519753738,-  
0.40320419844251,0.686798011343181,NA  
"15996","IGFN1",0.59577915332575,-0.644815732345979,2.02351755945697,-  
0.318660803970993,0.749983740158533,NA  
"15997","PKP1",0.343766400388244,-1.37533059850399,2.97715619562404,-0  
.461961183133594,0.644109157014252,NA  
"15998","LAD1",0,NA,NA,NA,NA,NA

"15999", "TNNI1", 0, NA, NA, NA, NA, NA  
"16000", "AC096677.1", 1.83410603537742, 0.181893640301199, 1.087675892752  
01, 0.167231471721761, 0.867187922238295, NA  
"16001", "AL645504.1", 1.96880373601315, 0.102669394546298, 1.168649089747  
4, 0.0878530565308443, 0.92999346773292, NA  
"16002", "ELF3", 1.15021353543957, 0.519688382262577, 1.45527057076104, 0.3  
57107738384899, 0.721011151538132, NA  
"16003", "GPR37L1", 0.324137039266305, -0.0524131773797337, 2.653492295942  
42, -0.0197525266833754, 0.984240788704199, NA  
"16004", "LGR6", 0.377143955248973, -0.842802200139846, 2.52682562173735, -  
0.333541892598178, 0.738725272299152, NA  
"16005", "SYT2", 0.760381966799049, 2.57820255871369, 2.09567840506692, 1.2  
3024723281975, 0.218604537446964, NA  
"16006", "AC098934.4", 0.183715948661733, 0.576034712544328, 3.34068880739  
852, 0.172429922616139, 0.863099549623161, NA  
"16007", "PPFIA4", 0.493265823419883, -0.648609686894505, 2.11554841579398  
, -0.306591748055588, 0.759154135443565, NA  
"16008", "ADORA1", 0.0534622507802646, -0.0533240139618838, 3.352475197537  
38, -0.015905863822961, 0.987309491940711, NA  
"16009", "CHIT1", 1.93973361858401, -4.21010556225138, 1.40777332949463, -2  
.99061324294497, 0.00278417874491021, NA  
"16010", "LINC01353", 0.506146292266465, 1.88603467024434, 2.3772538781346  
5, 0.793366954868217, 0.427564057735052, NA  
"16011", "LINC01136", 0.773241165968907, -0.0845784313169009, 1.7760747606  
2526, -0.0476209860034977, 0.96201830658999, NA  
"16012", "LAX1", 1.15341509273629, 0.0934942471635033, 1.30882426498822, 0.  
0714337666748138, 0.943052536322074, NA  
"16013", "LINC00303", 0.171420620199322, 0.765902268429694, 3.335691013369  
87, 0.22960827767316, 0.818396174063793, NA  
"16014", "AL592146.2", 0.527482349049977, -0.142990433014554, 2.1253022112  
4961, -0.0672800471658475, 0.946358760946984, NA  
"16015", "LINC00628", 0, NA, NA, NA, NA, NA  
"16016", "AL512306.3", 0.851432712182764, 1.80931134214735, 1.774480988049  
21, 1.01962847409057, 0.307904695460201, NA  
"16017", "LRRN2", 2.24562392200695, 3.21927918978889, 1.44440812198284, 2.2  
2878779258701, 0.0258280275608975, NA  
"16018", "AL512306.2", 0.350443004523411, 0.278677423508893, 2.58156446456  
357, 0.107949046918727, 0.914036110590592, NA  
"16019", "NFASC", 0.721949772887255, 0.207588645048869, 1.9839119438927, 0.  
104636017585313, 0.916664633668953, NA  
"16020", "CNTN2", 1.41564409363298, 0.157408748031358, 1.4359577716106, 0.1  
09619343370247, 0.912711269317349, NA  
"16021", "NUAK2", 1.4975346605163, 0.430069940592014, 1.32436685284963, 0.3  
2473626145704, 0.745380688036259, NA  
"16022", "CDK18", 0.944962163169096, -0.303505699229135, 1.63732288083884,  
-0.185367042005571, 0.852941157086008, NA  
"16023", "MFSD4A", 0.536724581783482, 1.14856381622338, 2.05196674310039, 0  
.559738026985748, 0.57565814039046, NA  
"16024", "SLC45A3", 0.891087306127186, -0.221970617700672, 1.6016069496804  
4, -0.138592441638044, 0.889772216366387, NA

"16025","PM20D1",1.97386625964219,-0.176598727727501,1.13641326455468,-0.15540009364173,0.876505910346733,NA  
"16026","RHEX",0.779641425968125,0.116907547868288,1.66393294406158,0.0702597711557548,0.943986901310178,NA  
"16027","C1orf147",0,NA,NA,NA,NA,NA  
"16028","AC244034.2",0.735670462259986,0.609585602697333,1.80069033414392,0.338528835935103,0.734964700539956,NA  
"16029","IL19",0.819007607108961,0.880823849669997,1.95896784458704,0.449636706444091,0.652972416228046,NA  
"16030","IL20",0.886256245048343,-0.910192809934758,1.46596164723595,-0.620884462871806,0.534675644659674,NA  
"16031","IL24",0,NA,NA,NA,NA,NA  
"16032","PIGR",0,NA,NA,NA,NA,NA  
"16033","C4BPB",0.203054089861245,-1.95461545718866,3.33573296423696,-0.585962808817275,0.557900507779092,NA  
"16034","AL445493.3",1.00316345182967,2.05021249447615,1.62128394059007,1.26456103286262,0.206028729127021,NA  
"16035","CR2",0.219614265997676,-1.35173207482145,3.35247519753738,-0.40320419844251,0.686798011343181,NA  
"16036","CR1",2.15601300938355,0.229490625069378,1.06542361859219,0.215398477248532,0.829456657123683,NA  
"16037","CR1L",0.688273128667403,-0.778369704036361,2.23065293250479,-0.348942541752711,0.727132446378234,NA  
"16038","AL356275.1",1.71293100516495,2.06923238588434,1.29744343751586,1.59485363758607,0.110744969274736,NA  
"16039","IRF6",0.271251509622856,-0.774665352300728,3.18287089738686,-0.243385728568736,0.8077065984266,NA  
"16040","KCNH1",0.156148522800746,0.494635591052761,3.34300496985029,0.147961368742719,0.882373255878367,NA  
"16041","AL590101.1",0.907898888758143,-0.547047299148904,1.52854405070641,-0.357887820698454,0.720427265549768,NA  
"16042","RD3",0,NA,NA,NA,NA,NA  
"16043","NEK2",0.102230937222884,-1.35173207482145,3.35247519753738,-0.403204198442509,0.686798011343181,NA  
"16044","DTL",0.675342902335073,1.54188956692058,1.9061555504141,0.808900179518727,0.418572565654836,NA  
"16045","AL360091.2",0,NA,NA,NA,NA,NA  
"16046","AL360091.3",0.244351032334407,-0.774664026145693,3.30062972833046,-0.234701887187309,0.814440122883676,NA  
"16047","LINC01740",0.306692811668653,-2.34839005368482,3.32010114242453,-0.707324853353681,0.479364624090735,NA  
"16048","AC092803.4",1.49973466982706,-0.665275763265011,1.25894197733609,-0.528440369168344,0.597193724730533,NA  
"16049","AL590648.2",0,NA,NA,NA,NA,NA  
"16050","LINC02773",0.522550044682349,0.493660772099988,2.35823272327543,0.209335052994399,0.834186689569368,NA  
"16051","PROX1-AS1",0.593980764304638,-0.173140762338544,2.07201272934259,-0.083561630624479,0.933404974524611,NA  
"16052","AC011700.1",0.205372544040962,0.695830627438559,3.33747149429

751,0.208490358233014,0.834846110249776,NA  
"16053","KCNK2",0.806782323779106,-2.10793032846405,1.8330235478209,-1  
.14997449485576,0.250154376296835,NA  
"16054","TGFB2-  
AS1",1.57635210725929,0.534267174429745,1.23896973356717,0.43121890709  
2683,0.666309207559588,NA  
"16055","LYPLAL1-  
DT",0.857611252984382,0.834016047886343,1.56212768931022,0.53389748712  
1948,0.593412460733196,NA  
"16056","AL360093.1",0.314802175914727,1.16511964632437,2.651977911478  
1,0.439339875826864,0.660415284707152,NA  
"16057","AC096642.2",0.249044596672051,0.88628321168114,3.274626073559  
89,0.270651729929472,0.786658905412859,NA  
"16058","SLC30A10",0,NA,NA,NA,NA,NA  
"16059","C1orf115",0.324713760403121,-0.225893185321799,2.608892863089  
65,-0.0865858420319639,0.931000720053001,NA  
"16060","LINC01352",0.508429709064854,0.69367862620079,1.9134119917202  
8,0.362534900587264,0.716952347855726,NA  
"16061","LINC02817",1.33084229365254,2.41976142120617,1.40430596699122  
,1.72310128852518,0.0848702098608272,NA  
"16062","LINC01655",0,NA,NA,NA,NA,NA  
"16063","LINC02257",0.79325123673363,1.38226839926984,1.74229022473479  
,0.793362885038422,0.427566428223141,NA  
"16064","AL356108.1",0.635437440621101,1.33082457431499,1.987972500071  
06,0.669438120631657,0.503216041245057,NA  
"16065","AL513314.2",1.74868372121005,0.385705656550384,1.156838633349  
81,0.333413533600199,0.738822148701562,NA  
"16066","HHIPL2",0.0644961186387932,-0.0533240139618838,3.352475197537  
38,-0.015905863822961,0.987309491940711,NA  
"16067","FAM177B",0.204461874445769,-1.96013641505178,3.33548947920397  
, -0.587660799793491,0.556759992345141,NA  
"16068","AL392172.2",0,NA,NA,NA,NA,NA  
"16069","AL929091.1",1.01018849481762,1.27675073970446,1.6738050754404  
8,0.762783407959537,0.445592577872426,NA  
"16070","SUSD4",0.237178199441998,0.945890913069552,2.83590635755811,0  
.333540954393156,0.738725980375699,NA  
"16071","CAPN8",0.106924501560529,0.385965786494404,3.34626872025989,0  
.115342137395477,0.908173940404949,NA  
"16072","AC138393.3",0.205372544040962,0.695830627438559,3.33747149429  
751,0.208490358233014,0.834846110249776,NA  
"16073","AC092809.2",0.168565237602375,-1.35173207482145,3.35247519753  
738,-0.40320419844251,0.686798011343181,NA  
"16074","AC092809.4",0.594795717350366,-1.08733999000724,2.06601432875  
907,-0.526298377930583,0.598680909866317,NA  
"16075","AC096537.1",1.37023600479965,-4.34823958238606,1.629545711496  
96,-2.66837533412403,0.00762190584143897,NA  
"16076","AC099066.2",0.644601076036314,-1.07007166783785,2.59791101942  
449,-0.411896966384516,0.680414944411643,NA  
"16077","LEFTY1",1.91317557629588,-2.087273760941,1.2486630474696,-1.6  
7160689600836,0.0946018640526724,NA

"16078", "AL117348.1", 0, NA, NA, NA, NA, NA  
"16079", "LEFTY2", 2.18998657036649, -0.464343597498494, 1.285401725685, -0.361243950603101, 0.717917089420544, NA  
"16080", "ACBD3-AS1", 0, NA, NA, NA, NA, NA  
"16081", "MIXL1", 0, NA, NA, NA, NA, NA  
"16082", "ITPKB-IT1", 0, NA, NA, NA, NA, NA  
"16083", "ITPKB-AS1", 0.322850641021, -1.51171106944378, 2.60963996021438, -0.579279552923307, 0.562400559885429, NA  
"16084", "AL359732.1", 0.551499178800657, -1.10038970849099, 2.33611426399405, -0.471034197877658, 0.637616313896921, NA  
"16085", "AL353689.3", 0.11921983002294, -0.0533240139618846, 3.35247519753738, -0.0159058638229612, 0.987309491940711, NA  
"16086", "AL627308.3", 0.23843966004588, 0.69583062743856, 3.33747149429751, 0.208490358233014, 0.834846110249776, NA  
"16087", "AL731702.1", 0.909346701339299, 0.21518242632736, 1.9061626014089, 0.112887760030709, 0.910119540377548, NA  
"16088", "PRSS38", 0, NA, NA, NA, NA, NA  
"16089", "LINC02809", 0.204917209243366, -0.774663427007578, 3.35247519753738, -0.231072082972194, 0.817258802814834, NA  
"16090", "IBA57-DT", 0, NA, NA, NA, NA, NA  
"16091", "OBSCN-AS1", 0.347492639152484, 1.36515954890128, 3.01727533496929, 0.452447787273339, 0.650946427429436, NA  
"16092", "AL353593.3", 0, NA, NA, NA, NA, NA  
"16093", "AL670729.3", 1.40044163645666, 0.840355124553822, 1.71927035647916, 0.48878590931723, 0.62499327482658, NA  
"16094", "TRIM17", 2.19973439549071, 1.54440933303664, 1.10240548587578, 1.40094489080823, 0.161230553366332, NA  
"16095", "HIST3H2BB", 1.54341298253372, 1.05628338858784, 1.30051348776915, 0.812204870246864, 0.416674085428085, NA  
"16096", "AL117350.1", 0.5834093779906, 2.18793633594127, 1.91232893192176, 1.14412133781951, 0.252573319657131, NA  
"16097", "ACTA1", 1.01044905839058, -0.472224713405119, 1.46739991432481, -0.321810509047495, 0.747596252413276, NA  
"16098", "LINC01736", 1.2392133223947, -1.05384953111067, 1.50598115531535, -0.699776041281205, 0.484067179390576, NA  
"16099", "AL136988.2", 0.221906102043421, 0.695830468846429, 3.33747149841039, 0.208490310457437, 0.834846147549618, NA  
"16100", "AL136988.1", 0.766086123971027, 0.718273629940659, 1.98382457304103, 0.362065093709172, 0.717303387691052, NA  
"16101", "PGBD5", 0.873010625531556, 0.989975263229481, 1.70853692986584, 0.57942865964695, 0.562299970637541, NA  
"16102", "AL158214.2", 0, NA, NA, NA, NA, NA  
"16103", "AL118511.1", 0.911356652823131, 0.144770127370962, 1.70928039499607, 0.0846965353342713, 0.932502650474362, NA  
"16104", "TRIM67", 0.102686272020481, -0.0533240139618846, 3.35247519753738, -0.0159058638229612, 0.987309491940711, NA  
"16105", "DISC1-IT1", 0.571773851353833, 1.09689045870771, 1.86497812632338, 0.58815191622

1196,0.556430328685596,NA  
"16106","SLC35F3",0.166727055861678,-0.774663427007578,3.3524751975373  
8,-0.231072082972193,0.817258802814835,NA  
"16107","LINC01132",0.591662310124921,-2.31771523900407,1.934570314882  
47,-1.19805169198251,0.230896893683207,NA  
"16108","AL391832.4",0.102230937222884,-1.35173207482145,3.35247519753  
738,-0.403204198442509,0.686798011343181,NA  
"16109","AL391832.3",0.273505233441565,-0.226106766776126,2.7449021822  
0006,-0.082373342205914,0.934349833830783,NA  
"16110","LINC01348",0.410289753284328,0.547543542914136,2.921493388983  
95,0.18741905936832,0.85133208015149,NA  
"16111","AL732292.2",0.865656643244949,0.69210724554715,1.566282041366  
92,0.441879066009808,0.65857671987911,NA  
"16112","LINC02768",0.339409136664882,0.229924359511437,2.292888735885  
26,0.100277155150604,0.920124293611764,NA  
"16113","EDARADD",0.355931708695347,-1.7667699881487,2.95338520765146,  
-0.598218608115003,0.549694076769176,NA  
"16114","AL359921.1",0.347037304354888,-0.0545756175730095,2.614005304  
4848,-0.0208781586936244,0.983342849664216,NA  
"16115","ACTN2",0.788986389059609,0.727627646135318,1.79707776708003,0  
.404894912988434,0.685554757793496,NA  
"16116","RYR2",0,NA,NA,NA,NA,NA  
"16117","AC093426.1",0,NA,NA,NA,NA,NA  
"16118","CHRM3",0,NA,NA,NA,NA,NA  
"16119","CHRM3-  
AS2",0.450178911172965,1.76774888517765,2.81742879482692,0.62743338480  
2275,0.530375189704012,NA  
"16120","FMN2",1.85796098055614,0.617655149736452,1.15860699159804,0.5  
33101521236752,0.593963306081474,NA  
"16121","AL358176.4",0,NA,NA,NA,NA,NA  
"16122","RGS7",0,NA,NA,NA,NA,NA  
"16123","AL359764.2",0.483367413517102,0.406160622257373,2.14632006088  
113,0.189235813269448,0.849907999795882,NA  
"16124","KM0",0.788652440601231,-1.20948029634058,1.60780505566527,-0.  
752255562376075,0.451897385773939,NA  
"16125","AL133390.1",0.249044596672051,0.88628321168114,3.274626073559  
89,0.270651729929472,0.786658905412859,NA  
"16126","EX01",0.591233593461296,-3.10691786786195,1.92131913827195,-1  
.61707537596088,0.105862011419001,NA  
"16127","AL591686.2",0.500251223803273,2.01684082651871,2.023551627873  
85,0.996683652019204,0.318918087339069,NA  
"16128","AL591686.1",0.669173727497874,-0.264031774240659,2.0359672181  
1723,-0.129683706049464,0.896816674382602,NA  
"16129","AL591721.1",0.203054089861245,-1.95461545718866,3.33573296423  
696,-0.585962808817275,0.557900507779092,NA  
"16130","C1orf100",0.659431013222907,-2.38972712282497,2.1832352162675  
, -1.09458069612421,0.273700376459465,NA  
"16131","AL451007.3",0.275489739162904,-0.333877366261583,3.2086972406  
7456,-0.104053870221608,0.917126598293383,NA  
"16132","AL451007.2",0.439677569991484,0.279268974458065,2.42445800272

399,0.11518820872306,0.908295944540891,NA  
"16133","BX323046.2",1.49404298569627,1.35347873025308,1.4426408382417  
3,0.938195214203613,0.348144097385103,NA  
"16134","BX323046.1",0.358747277864394,-1.79344174898354,2.50947896308  
126,-0.714666978830322,0.474814846659672,NA  
"16135","KIF26B",0.816376290182766,0.474101816753772,1.99992636764037,  
0.237059636007073,0.812610525679466,NA  
"16136","SMYD3-  
IT1",0.769996880136235,-0.79786074961557,1.95273053537325,-0.408587224  
485157,0.682842607711289,NA  
"16137","AL591848.3",0.711389030720852,1.18313728735065,1.984975132820  
55,0.596046402691941,0.55114422804883,NA  
"16138","ZNF695",0.931252808151773,1.04490676705204,1.57883322780852,0  
.661822128295596,0.508085222784455,NA  
"16139","AC104335.1",1.64671265872013,-0.37701793959803,1.146689731404  
19,-0.328788101325673,0.742315857305814,NA  
"16140","AC104335.2",0.32696748422183,0.17244460144307,2.6132994629272  
4,0.0659873098699178,0.947387928690436,NA  
"16141","OR2B11",0.220042982661301,-0.774663427007579,3.35247519753738  
, -0.231072082972194,0.817258802814834,NA  
"16142","GCSAML",0.710882140147861,-1.64349215327227,1.91355343949796,  
-0.858869221704856,0.390412671815044,NA  
"16143","OR2C3",1.0400455979918,1.36555348805387,1.84848084003838,0.73  
8743652882829,0.460062673108148,NA  
"16144","AL390860.1",0.717248847233984,-1.67130669419584,1.75775715616  
471,-0.950817744268214,0.341696903343228,NA  
"16145","TRIM58",2.2953987809993,-0.44913291190075,1.16069953573176,-0  
.386950195183453,0.69879307969553,NA  
"16146","OR2L2",1.59295978229549,0.382276872702557,1.30363527387099,0.  
293239129352054,0.769339377086112,NA  
"16147","FAM110C",0,NA,NA,NA,NA,NA  
"16148","AC079779.2",1.13407311231168,0.93814876998218,1.7167057478835  
6,0.546481988039464,0.584734665693255,NA  
"16149","AC093326.1",2.27949400803013,-0.333946998842868,1.44633738727  
979,-0.230891493077519,0.817399099735423,NA  
"16150","AC116609.3",0.786687932056155,2.64144186709427,2.064733744885  
1,1.27931355490161,0.200786661195631,NA  
"16151","LINC01115",0,NA,NA,NA,NA,NA  
"16152","TPO",0,NA,NA,NA,NA,NA  
"16153","AC144450.1",0.676887511997439,0.545158577848217,2.26665313391  
533,0.240512573225764,0.809932917264621,NA  
"16154","MYT1L",0.0644961186387932,-0.0533240139618838,3.3524751975373  
8,-0.015905863822961,0.987309491940711,NA  
"16155","EIPR1-IT1",0,NA,NA,NA,NA,NA  
"16156","TRAPPC12-  
AS1",0.853049174725862,0.297456876961083,1.90988164272999,0.1557462359  
47845,0.87623305081758,NA  
"16157","AC114810.1",0,NA,NA,NA,NA,NA  
"16158","SOX11",0,NA,NA,NA,NA,NA  
"16159","LINC00487",0.0644961186387932,-0.0533240139618838,3.352475197

53738,-0.015905863822961,0.987309491940711,NA  
"16160","NRIR",0.320866135299661,-1.37464340165215,3.04127275254598,-0.451996092919114,0.651271797119151,NA  
"16161","AC017076.1",0.102686272020481,-0.0533240139618846,3.35247519753738,-0.0159058638229612,0.987309491940711,NA  
"16162","RNF144A-AS1",1.19521837901198,-2.13242382799994,1.62365089215593,-1.31335118793207,0.189064637370983,NA  
"16163","AC010904.2",0.420894148103731,1.71663245073883,2.39410559968025,0.717024533490962,0.473358958865676,NA  
"16164","AC013460.1",0.417033113137611,0.413097229319217,2.22161725051422,0.185944374182187,0.852488383400628,NA  
"16165","AC092580.4",0.156148522800746,0.494635591052761,3.34300496985029,0.147961368742719,0.882373255878367,NA  
"16166","LINC00298",0,NA,NA,NA,NA,NA  
"16167","LINC00299",0.965529504828934,1.99706896345856,1.67266013192739,1.19394784710828,0.232498369410133,NA  
"16168","U91324.1",1.17337364141132,-0.156571218621887,1.64336455216949,-0.0952747936635174,0.924096563304857,NA  
"16169","LINC01814",0.20961077358101,0.88584532733971,3.33280883148308,0.265795421258984,0.790396769724465,NA  
"16170","AC092617.1",0,NA,NA,NA,NA,NA  
"16171","AC082651.4",0.102686272020481,-0.0533240139618846,3.35247519753738,-0.0159058638229612,0.987309491940711,NA  
"16172","AC082651.3",1.28745873853718,-1.73139353727922,1.42043386792767,-1.21891879401976,0.222875015650851,NA  
"16173","AC010969.1",0.142120095111522,-0.0533240139618842,3.35247519753738,-0.0159058638229611,0.987309491940711,NA  
"16174","RRM2",0.912188640387888,0.857900703074758,1.579471548061,0.543156794516457,0.587021851402053,NA  
"16175","AC007240.3",0.546025350415198,1.03737835727126,1.87139084499042,0.554335487986511,0.579349267503447,NA  
"16176","ATP6V1C2",0.913962848143078,-2.14023770325648,1.54843381451061,-1.38219514660555,0.166911789940007,NA  
"16177","AC092687.3",1.15680738304215,-0.0960227690127695,1.38786290337692,-0.0691875031598068,0.944840370304166,NA  
"16178","C2orf50",0.392871387445147,0.542201704530288,2.19605406031056,0.246898158988677,0.804987041144592,NA  
"16179","LINC00570",1.25575772049498,2.47796943396374,1.52415006924032,1.62580410155992,0.103991335563797,NA  
"16180","AC099344.3",0.645029792699939,-0.175674016925042,2.04119321124105,-0.086064374483311,0.931415243553722,NA  
"16181","MIR3681HG",0.0534622507802646,-0.0533240139618838,3.35247519753738,-0.015905863822961,0.987309491940711,NA  
"16182","AC009486.1",0,NA,NA,NA,NA,NA  
"16183","LINC00276",0.414363867949205,0.555913947657834,2.16963488019048,0.256224654541426,0.797777372334948,NA  
"16184","MYCN",0,NA,NA,NA,NA,NA  
"16185","AC079148.1",2.07201924529623,0.74191890620609,1.20747892104076,0.614436321229204,0.538927040524367,NA



"16186","NT5C1B",0.102686272020481,-0.0533240139618846,3.3524751975373  
8,-0.0159058638229612,0.987309491940711,NA  
"16187","AC130814.1",0.388179503600051,-2.37645961319578,2.86395305033  
592,-0.829783020680815,0.406661472415033,NA  
"16188","AC010096.1",0.142120095111522,-0.0533240139618842,3.352475197  
53738,-0.0159058638229611,0.987309491940711,NA  
"16189","AC013400.1",1.32485350383014,0.424305043108221,1.247214759777  
05,0.340202070078188,0.733704359368856,NA  
"16190","AC079145.1",0.944276507588873,1.97853957241215,1.829123712256  
44,1.08168712654836,0.279391575321103,NA  
"16191","MATN3",2.0568164397365,0.879415413863609,1.16504384281362,0.7  
54834609262252,0.450348225018614,NA  
"16192","LAPTM4A-  
DT",1.38340067976014,-0.0120863125702601,1.25698715324527,-0.009615303  
17876026,0.992328216260997,NA  
"16193","AC012065.3",1.26201903384676,-0.76515929673513,1.293825336982  
82,-0.591393038042885,0.554257104019742,NA  
"16194","GDF7",1.01912707290953,-0.274993679882011,2.4072271607536,-0.  
11423669704521,0.909050162273575,NA  
"16195","APOB",1.17781813626906,3.19078666396819,1.47234443035835,2.16  
714689727294,0.0302236549643285,NA  
"16196","TDRD15",0,NA,NA,NA,NA,NA  
"16197","AC018742.1",0,NA,NA,NA,NA,NA  
"16198","AC011752.1",0.142120095111522,-0.0533240139618842,3.352475197  
53738,-0.0159058638229611,0.987309491940711,NA  
"16199","AC018467.1",0.657240359980972,1.4267240323098,1.9516414724466  
3,0.731037976212514,0.464755957067319,NA  
"16200","AC009242.1",1.23307971332897,1.0050007493412,1.44393520112039  
,0.696015131815745,0.486419353438946,NA  
"16201","MFSD2B",0.828436515975984,0.262917691454743,1.55958466638407,  
0.168581864852726,0.866125546134242,NA  
"16202","AC012073.1",0.6939448031232,-0.871242795360431,1.964811995437  
62,-0.443422982648464,0.657459815331197,NA  
"16203","EFR3B",1.40769550045362,-0.59194624145956,1.23292230001122,-0.  
.480116420519096,0.631144612782562,NA  
"16204","AC012074.1",0.574187288307529,0.882860482742878,2.06239570861  
431,0.428075213236386,0.668596362152897,NA  
"16205","ADGRF3",0.117958369419058,0.451348601316665,3.34428110054629,  
0.134961322851401,0.892642454377335,NA  
"16206","OTOF",0.474785871923121,0.808293718624075,2.42713866470911,0.  
333023296269292,0.739116698027793,NA  
"16207","KCNK3",0.219614265997676,-1.35173207482145,3.35247519753738,-  
0.40320419844251,0.686798011343181,NA  
"16208","DPYSL5",0.102686272020481,-0.0533240139618846,3.3524751975373  
8,-0.0159058638229612,0.987309491940711,NA  
"16209","AC013472.1",0,NA,NA,NA,NA,NA  
"16210","AGBL5-  
AS1",0.67617564627533,1.22266143822716,1.90148485699089,0.643003510510  
213,0.52022182200525,NA  
"16211","AC013472.3",0.0534622507802646,-0.0533240139618838,3.35247519

753738,-0.015905863822961,0.987309491940711,NA  
"16212","AC013403.2",0.416777304902901,0.279134849681388,2.45910155107  
754,0.113510907900113,0.909625515721006,NA  
"16213","TCF23",1.99893257269711,0.555628150067095,1.23163801739938,0.  
451129424569333,0.651896271644896,NA  
"16214","SLC30A3",0.11921983002294,-0.0533240139618846,3.3524751975373  
8,-0.0159058638229612,0.987309491940711,NA  
"16215","TRIM54",0,NA,NA,NA,NA,NA  
"16216","GTF3C2-  
AS1",0.7422941162666,1.18686327460034,2.21287357323326,0.5363448183197  
37,0.591720261052158,NA  
"16217","KRTCAP3",2.26597721751864,0.280262699677929,1.08771168210982,  
0.257662673195076,0.7966672560458,NA  
"16218","GCKR",0.375762788798422,-0.225710046048203,2.51055325657251,-  
0.0899045042989249,0.928363101737299,NA  
"16219","LINC01460",0.258834794821227,1.09609913055011,3.2711262485082  
8,0.335083102050849,0.737562399373167,NA  
"16220","AC104695.2",0.273076516777941,-0.774665331385065,3.1847619460  
6587,-0.243241204367569,0.807818548712931,NA  
"16221","PLB1",1.27852597371525,-0.841264311208228,1.26460258661901,-0.  
.665240068389707,0.505896956293773,NA  
"16222","AC097724.1",0.182454488057851,0.814003878402388,3.33451052748  
657,0.244114952312343,0.80714179253596,NA  
"16223","TOGARAM2",2.2873527734694,-0.207267053424543,1.06631432912972  
, -0.194377068526975,0.845880644145967,NA  
"16224","PCARE",0.449858372577248,-0.329289749654812,2.43155560776834,  
-0.13542349128385,0.892277051856705,NA  
"16225","ALK",0.424986810038638,-0.0437719833216291,2.82908759553679,-  
0.0154721201954596,0.987655526691838,NA  
"16226","AC016907.2",0.805212616737662,-1.03576761455337,1.66096800812  
814,-0.623592754035433,0.532895070478084,NA  
"16227","LINC01936",0.345629519770364,-0.054409187889382,2.61698850261  
154,-0.0207907630603215,0.98341256615796,NA  
"16228","GALNT14",0,NA,NA,NA,NA,NA  
"16229","CAPN14",0,NA,NA,NA,NA,NA  
"16230","AL121652.1",0.370691815318116,0.409327796421713,2.56535485568  
3,0.159559912545796,0.873227759460615,NA  
"16231","AL121655.1",1.04787783985905,-0.441137205070226,1.54398597488  
299,-0.285713220357236,0.775097778231398,NA  
"16232","NLRC4",0.769679042079837,-1.8196180135069,1.86625310590983,-0.  
.975011378544931,0.329554615807526,NA  
"16233","AL133243.1",0.477867723373171,0.426489552005014,2.14898565583  
742,0.198460864941799,0.842684500975616,NA  
"16234","LINC00486",0.117958369419058,0.451348601316665,3.344281100546  
29,0.134961322851401,0.892642454377335,NA  
"16235","AC019127.1",0,NA,NA,NA,NA,NA  
"16236","RASGRP3",1.13075986447916,-1.30025391216228,1.47118363095445,  
-0.883814831000214,0.376796178963991,NA  
"16237","AC020594.1",0.82934740013991,1.52909169060165,1.7150024981633  
7,0.891597354662275,0.372608788568835,NA

"16238", "AC017050.1", 0.172682080803205, 0.494635591052761, 3.34300496985  
029, 0.147961368742719, 0.882373255878367, NA  
"16239", "AC007378.1", 0.339262812684241, -0.0349910483728248, 3.044545146  
73679, -0.0114930298899752, 0.990830090769536, NA  
"16240", "AC006369.1", 0.168565237602375, -1.35173207482145, 3.35247519753  
738, -0.40320419844251, 0.686798011343181, NA  
"16241", "LINC00211", 0, NA, NA, NA, NA, NA  
"16242", "RMDN2-  
AS1", 0.541375438730553, 2.04168176237738, 2.69418093198324, 0.75781167409  
3638, 0.448563732625456, NA  
"16243", "AC009229.3", 0.167182390659274, 0.576034712544328, 3.34068880739  
852, 0.172429922616139, 0.863099549623161, NA  
"16244", "AC009229.1", 0.589337999366887, 2.17289977712762, 2.235459776972  
33, 0.972014705659591, 0.331043232718552, NA  
"16245", "AC074366.1", 0, NA, NA, NA, NA, NA  
"16246", "CDKL4", 0.324592374063902, 1.32629053141379, 3.07347552214963, 0.  
431527930466861, 0.666084548480396, NA  
"16247", "AC007684.2", 1.43868312796322, 0.753846616518977, 1.403483734181  
6, 0.537125296260421, 0.59118106844706, NA  
"16248", "SLC8A1-  
AS1", 0.824291874856757, -1.63168403955387, 2.15013856802825, -0.758873899  
48555, 0.447927993595444, NA  
"16249", "AC007877.1", 0.334364781318548, 1.40513136139298, 2.996844298340  
15, 0.468870325419052, 0.639162328433279, NA  
"16250", "AC009413.2", 0, NA, NA, NA, NA, NA  
"16251", "LINC01913", 0.271251509622856, -0.774665352300728, 3.18287089738  
686, -0.243385728568736, 0.8077065984266, NA  
"16252", "C2orf91", 0.814196689080552, 0.14511898792536, 1.78235361193124,  
0.0814198635747252, 0.935108052705447, NA  
"16253", "AC083949.1", 0.205372544040962, 0.695830627438559, 3.33747149429  
751, 0.208490358233014, 0.834846110249776, NA  
"16254", "LINC01819", 0.916127958850886, 1.76515372751106, 1.6649443564909  
4, 1.06018781986884, 0.289059161200435, NA  
"16255", "AC010883.2", 0, NA, NA, NA, NA, NA  
"16256", "LINC01126", 1.8867999820663, -0.566216883616986, 1.2384986911735  
4, -0.457180041975231, 0.647541642314599, NA  
"16257", "AC010883.1", 2.0289229711405, -0.725330179190661, 0.939615006868  
622, -0.771944013120766, 0.440147587872846, NA  
"16258", "ABCG5", 0.308058816061443, 1.2759273050851, 3.31959886931736, 0.3  
84361892901681, 0.700710240394097, NA  
"16259", "ABCG8", 0.233061356241168, -0.774663445836492, 3.35085807648355,  
-0.231183603767975, 0.817172167312465, NA  
"16260", "AC019129.2", 0.52781864966426, 2.06805563436852, 2.2049002157441  
3, 0.937936156748289, 0.348277220570322, NA  
"16261", "LINC01833", 0, NA, NA, NA, NA, NA  
"16262", "SIX3", 0.824377277097584, 0.311162165546047, 2.09199381019275, 0.  
148739524959387, 0.88175917171552, NA  
"16263", "AC093833.1", 0.472228463144689, 0.896335102595912, 2.40092843029  
805, 0.373328538778909, 0.70890393847627, NA  
"16264", "U51244.1", 0, NA, NA, NA, NA, NA

"16265","AC018682.1",0.768070629692366,0.447947284716244,1.77116557503  
251,0.252911015791408,0.800336976782738,NA  
"16266","AC016722.2",0.672206399555605,1.19626085154926,2.006304698524  
92,0.596250834895006,0.551007670182554,NA  
"16267","STPG4",0,NA,NA,NA,NA,NA  
"16268","AC073283.1",0.172682080803205,0.494635591052761,3.34300496985  
029,0.147961368742719,0.882373255878367,NA  
"16269","EPCAM-DT",0,NA,NA,NA,NA,NA  
"16270","KCNK12",0.90847392940241,0.0827954130361913,1.45331757434631,  
0.0569699386408589,0.954569141724813,NA  
"16271","AC092650.1",0.171420620199322,0.765902268429694,3.33569101336  
987,0.22960827767316,0.818396174063793,NA  
"16272","STON1-  
GTF2A1L",0.220042982661301,-0.774663427007579,3.35247519753738,-0.2310  
72082972194,0.817258802814834,NA  
"16273","GTF2A1L",0,NA,NA,NA,NA,NA  
"16274","NRXN1",0.30714814646625,-1.38503406788992,3.08534410716656,-0  
.448907486420329,0.653498395299422,NA  
"16275","GPR75",0.102686272020481,-0.0533240139618846,3.35247519753738  
, -0.0159058638229612,0.987309491940711,NA  
"16276","TSPYL6",0.142120095111522,-0.0533240139618842,3.3524751975373  
8,-0.0159058638229611,0.987309491940711,NA  
"16277","EML6",1.00474984168377,-0.858497039252114,1.49059088800687,-0  
.575944107910149,0.564652960827923,NA  
"16278","AC012358.1",0.361521066841708,1.49138941530967,2.965156963716  
08,0.502971489725318,0.614984317080534,NA  
"16279","AC011306.1",0.142120095111522,-0.0533240139618842,3.352475197  
53738,-0.0159058638229611,0.987309491940711,NA  
"16280","AC007743.1",1.61089153326364,-0.614396494778223,1.23293151506  
883,-0.498321672590161,0.618257334657278,NA  
"16281","AC132153.1",2.32952750428801,1.07031321646253,1.0931856684653  
6,0.979077248574864,0.327541812219017,NA  
"16282","AC007381.1",0,NA,NA,NA,NA,NA  
"16283","BCL11A",0.954427046675982,-0.492113441627363,1.36449168715963  
, -0.360656973038627,0.718355893320161,NA  
"16284","LINC01185",0.102686272020481,-0.0533240139618846,3.3524751975  
3738,-0.0159058638229612,0.987309491940711,NA  
"16285","AC016747.3",0.42806698099614,0.480112305801356,2.216646682388  
09,0.216593970349893,0.828524785164299,NA  
"16286","AC016727.3",0,NA,NA,NA,NA,NA  
"16287","AC107081.2",0.348606503275262,-0.207419509720268,2.9766877549  
0289,-0.0696813125187982,0.944447316071686,NA  
"16288","AC107081.4",0.306195696679323,-0.0320258052725539,3.128238498  
98919,-0.0102376482109348,0.991831681239967,NA  
"16289","AC092567.2",0.23843966004588,0.69583062743856,3.3374714942975  
1,0.208490358233014,0.834846110249776,NA  
"16290","OTX1",0.465451008571542,1.82689806140378,2.09202841207233,0.8  
7326637193903,0.382517905398113,NA  
"16291","AC009501.3",0.102686272020481,-0.0533240139618846,3.352475197  
53738,-0.0159058638229612,0.987309491940711,NA

"16292", "AC012368.2", 0, NA, NA, NA, NA, NA  
"16293", "AC012368.1", 1.96785438178024, 0.283443014065159, 1.122726914883  
04, 0.2524594452202, 0.800685957053934, NA  
"16294", "LINC00309", 0.501322707773513, -0.261522632567014, 1.94506697276  
945, -0.134454307346883, 0.89304334038757, NA  
"16295", "LGALSL-  
DT", 1.62666562739154, -3.1393513776992, 1.48859143632312, -2.108940909571  
22, 0.0349496824432671, NA  
"16296", "LINC01800", 0, NA, NA, NA, NA, NA  
"16297", "LINC02576", 0.102686272020481, -0.0533240139618846, 3.3524751975  
3738, -0.0159058638229612, 0.987309491940711, NA  
"16298", "AC012370.1", 0.786689936704948, -0.885871378541513, 1.9498764984  
4287, -0.454321788712748, 0.649597235827075, NA  
"16299", "LINC01829", 0.0534622507802646, -0.0533240139618838, 3.352475197  
53738, -0.015905863822961, 0.987309491940711, NA  
"16300", "LINC02831", 0.201646305276721, -1.9490730241217, 3.3359781915796  
, -0.584258323103367, 0.559046527482917, NA  
"16301", "AC017083.2", 2.08997570652119, -1.79720918655722, 1.139242482452  
44, -1.57754754956853, 0.114669590142483, NA  
"16302", "PROKR1", 0, NA, NA, NA, NA, NA  
"16303", "LINC01888", 0, NA, NA, NA, NA, NA  
"16304", "AC114802.1", 0.156148522800746, 0.494635591052761, 3.34300496985  
029, 0.147961368742719, 0.882373255878367, NA  
"16305", "TGFA", 0.25651634064151, -1.38285975574301, 2.79187243968638, -0.  
495316238695472, 0.62037691003485, NA  
"16306", "ADD2", 1.57592968171438, -0.640023124162768, 3.16485116791137, -0.  
.202228506241306, 0.839738088740305, NA  
"16307", "CLEC4F", 0.102230937222884, -1.35173207482145, 3.35247519753738,  
-0.403204198442509, 0.686798011343181, NA  
"16308", "VAX2", 1.82012417501219, 0.910492571977997, 1.23485804053803, 0.7  
37325702297969, 0.460924305633055, NA  
"16309", "ATP6V1B1", 0.811552705689814, -1.1853119517537, 1.72127499091768  
, -0.688624396454958, 0.491059664355781, NA  
"16310", "AC007881.3", 1.036000456657, -1.53251855121288, 1.61211732289526  
, -0.95062470295932, 0.341794923920267, NA  
"16311", "AC007881.4", 0.561168914727662, 1.05661332470561, 2.366384368118  
8, 0.446509594527784, 0.655229183583799, NA  
"16312", "FBX041", 0.838722401075633, -0.523283041555537, 1.71595038072085  
, -0.304952315308624, 0.76040247033215, NA  
"16313", "EGR4", 0.11921983002294, -0.0533240139618846, 3.35247519753738, -  
0.0159058638229612, 0.987309491940711, NA  
"16314", "AC074008.1", 1.42253720069602, -0.287923795829749, 1.19444202538  
648, -0.241052968423969, 0.809514063777954, NA  
"16315", "AC092653.1", 0.156148522800746, 0.494635591052761, 3.34300496985  
029, 0.147961368742719, 0.882373255878367, NA  
"16316", "AC073046.4", 0.284685425280735, 0.104122352415883, 2.73164482693  
201, 0.0381170902561391, 0.969594325157982, NA  
"16317", "ACTG2", 2.17016518665358, 2.09391684982739, 3.09000500018105, 0.6  
7764189692402, 0.497998774695249, NA  
"16318", "DGUOK-

AS1",0.552921839171657,-0.860613549241406,2.01780306155492,-0.42651018  
1116593,0.669736130898409,NA  
"16319","AC073046.1",0,NA,NA,NA,NA,NA  
"16320","DCTN1-AS1",0,NA,NA,NA,NA,NA  
"16321","AC005041.5",0.793618331567652,-1.07874770282755,2.12728126314  
423,-0.507101586196975,0.612083542114334,NA  
"16322","AC005041.3",0.0534622507802646,-0.0533240139618838,3.35247519  
753738,-0.015905863822961,0.987309491940711,NA  
"16323","TLX2",0.11921983002294,-0.0533240139618846,3.35247519753738,-  
0.0159058638229612,0.987309491940711,NA  
"16324","M1AP",0.403292610553443,-2.66819139654035,3.30268191986861,-0  
.807886275844117,0.419156052561062,NA  
"16325","AC019069.1",1.44492255990075,0.630209164404242,1.222015565744  
61,0.515712878027241,0.606054958865471,NA  
"16326","TACR1",0.221450767245824,-0.774663427007578,3.35247519753738,  
-0.231072082972194,0.817258802814834,NA  
"16327","AC007681.1",0.986036868865059,2.90117297136771,1.731544976761  
77,1.67548230643902,0.0938396397583636,NA  
"16328","EVA1A",2.23553646364318,-1.2098695126105,1.12224231256899,-1.  
07808224575041,0.28099705403154,NA  
"16329","AC005034.3",0.25651634064151,-1.38285975574301,2.791872439686  
38,-0.495316238695472,0.62037691003485,NA  
"16330","AC005034.5",1.11394585795753,-0.243675240786845,1.53306623114  
962,-0.158946323280578,0.873711163879471,NA  
"16331","AC005034.6",1.34227901641622,1.16364986491776,1.3133650760036  
1,0.886006401554838,0.375614077637913,NA  
"16332","AC005034.4",0.527646463925147,-0.0604133997871304,2.129396424  
65267,-0.0283711379843162,0.977366143483478,NA  
"16333","AC079117.2",0.0644961186387932,-0.0533240139618838,3.35247519  
753738,-0.015905863822961,0.987309491940711,NA  
"16334","AC013716.1",0.410745088081924,1.66416763505049,3.300435467626  
9,0.504226685046224,0.614102090381297,NA  
"16335","CTNNA2",0.167182390659274,0.576034712544328,3.34068880739852,  
0.172429922616139,0.863099549623161,NA  
"16336","DNAH6",1.22939330097001,-0.0441557975270456,1.47724771645089,  
-0.0298905843856239,0.976154315067614,NA  
"16337","AC022210.2",1.49169908575406,0.191619128899084,1.230612052612  
24,0.155710427581406,0.876261277410816,NA  
"16338","TCF7L1-  
IT1",0.586053685537583,0.87568335573748,1.88945899177042,0.46345719041  
8811,0.643036693418764,NA  
"16339","AC062037.3",0.220644641439539,0.945449760607245,2.90117912387  
055,0.325884655941509,0.744511625317288,NA  
"16340","SH2D6",0.307439366388676,-0.151735553622885,2.6698589116342,-  
0.0568327985279224,0.954678386705447,NA  
"16341","AC105053.1",0.424531475241042,-1.51514635242664,2.42235737435  
231,-0.625484236334766,0.531653291268699,NA  
"16342","ST3GAL5-  
AS1",1.76950098229522,1.33048536728676,1.19864724313908,1.109989093874  
2,0.267003726141576,NA

"16343", "REEP1", 0.709216900521777, -0.693309943042082, 1.75429155943239, -0.395207934116953, 0.692689437730672, NA  
"16344", "AC015971.1", 0.696236639168945, 0.558083717215282, 1.99662927380426, 0.279512939401085, 0.779851209376202, NA  
"16345", "RGPDI", 0.244351032334407, -0.774664026145693, 3.30062972833046, -0.234701887187309, 0.814440122883676, NA  
"16346", "AC068279.2", 1.90306872371157, -0.533811931020563, 1.06105752537925, -0.50309424159615, 0.614898015093506, NA  
"16347", "AC133644.2", 0.538562763524179, 0.90313874452996, 2.31782972076697, 0.389648444162288, 0.69679652459605, NA  
"16348", "AC108479.3", 0, NA, NA, NA, NA, NA  
"16349", "AC062029.1", 0.20774765419889, -0.335374473295219, 3.34626863491525, -0.10022341595528, 0.920166956363588, NA  
"16350", "MAL", 0.954829393460066, -0.746634943595703, 1.57045985381786, -0.475424406284949, 0.634484501939794, NA  
"16351", "PROM2", 1.39173390824972, 0.651714343305787, 1.28464467666336, 0.507310974890351, 0.611936639211716, NA  
"16352", "AC009237.15", 0.466833855514643, 0.37579093201435, 2.15084347773124, 0.174717935500701, 0.861301274058197, NA  
"16353", "ASTL", 0, NA, NA, NA, NA, NA  
"16354", "AC021188.1", 0, NA, NA, NA, NA, NA  
"16355", "ITPRIPL1", 0.645604833344205, 0.417980907145017, 1.69305361531922, 0.246879899941154, 0.805001172445546, NA  
"16356", "NCAPH", 0.364147583494162, -0.225749893303696, 2.53073911227991, -0.0892031470997106, 0.928920464327001, NA  
"16357", "NEURL3", 0, NA, NA, NA, NA, NA  
"16358", "AC013270.1", 0, NA, NA, NA, NA, NA  
"16359", "FER1L5", 0.128992237277586, 0.513744972953418, 3.34245151459318, 0.153703044220807, 0.877843884367224, NA  
"16360", "CNNM3-DT", 0.829673253507176, -1.86308378606261, 1.72496402370485, -1.08007109740243, 0.280110521222243, NA  
"16361", "LINC02611", 0.165319271277154, -0.774663427007578, 3.35247519753738, -0.231072082972193, 0.817258802814835, NA  
"16362", "KIAA1211L", 0, NA, NA, NA, NA, NA  
"16363", "C2orf15", 0.602335837045516, 1.24667204221943, 1.99540705291991, 0.624770790699149, 0.532121503964285, NA  
"16364", "AC079447.1", 0.805537931379951, -0.671676925208498, 1.74643283587832, -0.384599345253776, 0.700534279293245, NA  
"16365", "LYG1", 1.56029072660474, -0.890492101985288, 1.1389333588245, -0.781864974878221, 0.434293930878525, NA  
"16366", "AC018690.1", 1.48967623252864, -0.621602418754717, 1.25290927563753, -0.496127238293788, 0.619804642749397, NA  
"16367", "AC092667.1", 0, NA, NA, NA, NA, NA  
"16368", "AC092168.2", 0.306195696679323, -0.0320258052725539, 3.12823849898919, -0.0102376482109348, 0.991831681239967, NA  
"16369", "AC016738.2", 0.324592374063902, 1.32629053141379, 3.07347552214963, 0.431527930466861, 0.666084548480396, NA  
"16370", "AC016738.1", 0.410745088081924, 1.66416763505049, 3.3004354676269, 0.504226685046224, 0.614102090381297, NA

"16371", "LINC01127", 2.02966253059642, 2.4504987270144, 1.34132126923128, 1.82692900144556, 0.0677104450776924, NA  
"16372", "AC007271.1", 0, NA, NA, NA, NA, NA  
"16373", "IL1RL2", 2.31060668984364, -1.07965788679681, 0.894232596200116, -1.20735689057258, 0.227294730013665, NA  
"16374", "AC007278.2", 0, NA, NA, NA, NA, NA  
"16375", "AC007278.1", 0.0644961186387932, -0.0533240139618838, 3.35247519753738, -0.015905863822961, 0.987309491940711, NA  
"16376", "POU3F3", 1.84688183274241, -1.18481493502308, 1.19066250935395, -0.995088806202484, 0.319693074373721, NA  
"16377", "AC010884.1", 0, NA, NA, NA, NA, NA  
"16378", "LINC01918", 0, NA, NA, NA, NA, NA  
"16379", "AC012360.2", 1.00027837625304, 2.04880393683947, 1.62242447838217, 1.2628038864912, 0.206659667654495, NA  
"16380", "AC108058.1", 0.735831662027105, 0.744025616231345, 1.7134895307864, 0.434216610526868, 0.664131152101119, NA  
"16381", "AC010978.1", 0.203509424658842, -0.774663427007579, 3.35247519753738, -0.231072082972194, 0.817258802814834, NA  
"16382", "RGPD3", 0.938880975841779, 1.09773389638254, 2.12776134509192, 0.515910254180839, 0.605917091903351, NA  
"16383", "LINC01885", 0.306195696679323, -0.0320258052725539, 3.12823849898919, -0.0102376482109348, 0.991831681239967, NA  
"16384", "SULT1C2", 0.269413327882159, -0.15046778595343, 2.76844275514859, -0.0543510555432646, 0.956655473192921, NA  
"16385", "SULT1C4", 0.553653518105203, 0.98667823613526, 2.09806005250255, 0.470281217622135, 0.638154114731893, NA  
"16386", "GCC2-AS1", 1.58403714549624, -1.04026695736861, 1.13625762367188, -0.915520332446196, 0.359918533415601, NA  
"16387", "AC011753.2", 0.756520390026161, 2.54362515180853, 2.06863818062296, 1.22961336382302, 0.218841923252701, NA  
"16388", "LINC01123", 0.6443184350989, -0.673672400628086, 1.77898103225981, -0.378684420132536, 0.70492222415578, NA  
"16389", "LINC01106", 2.34327812191747, 0.883370593797565, 1.02875658942793, 0.85867794469126, 0.390518221873029, NA  
"16390", "RGPD6", 0.102686272020481, -0.0533240139618846, 3.35247519753738, -0.0159058638229612, 0.987309491940711, NA  
"16391", "BUB1", 0.738089225070914, 1.57084908820623, 2.18073430961408, 0.720330340693459, 0.471321628150419, NA  
"16392", "AC0XL", 0.267550208500038, -1.3833228396413, 2.75673373075219, -0.501797770386714, 0.615809781659427, NA  
"16393", "AC017002.1", 0.203509424658842, -0.774663427007579, 3.35247519753738, -0.231072082972194, 0.817258802814834, NA  
"16394", "AC093675.1", 1.24890267010589, -0.186059948824116, 1.26743293445402, -0.146800626499632, 0.883289390167156, NA  
"16395", "AC012442.1", 0.128992237277586, 0.513744972953418, 3.34245151459318, 0.153703044220807, 0.877843884367224, NA  
"16396", "CKAP2L", 1.13192261223223, 0.0779462738098864, 1.40269264767257, 0.0555690328449496, 0.95568513458116, NA  
"16397", "IL1A", 2.18650604009705, -1.39988366073611, 1.1939980500233, -1.1



7243379141934,0.241022939368637,NA  
"16398","AC079753.2",0.267550208500038,-1.3833228396413,2.756733730752  
19,-0.501797770386714,0.615809781659427,NA  
"16399","AC016745.2",1.23862194004014,-1.47834066460614,1.601107075282  
9,-0.923324047109674,0.355838359831564,NA  
"16400","AC104653.1",0.40610817972249,-2.69560124372427,2.718643946354  
01,-0.99152419254436,0.321429685206664,NA  
"16401","LINC01191",0.102686272020481,-0.0533240139618846,3.3524751975  
3738,-0.0159058638229612,0.987309491940711,NA  
"16402","AC009303.2",0,NA,NA,NA,NA,NA  
"16403","LINC01956",0.371644265105043,-0.769794427818552,2.54805679340  
679,-0.302110388516626,0.762567913357264,NA  
"16404","SCTR",0,NA,NA,NA,NA,NA,NA  
"16405","AC013275.1",2.22346224948566,3.30483066567065,1.3132449623678  
3,2.51653785879514,0.0118514166855712,NA  
"16406","CFAP221",0.102686272020481,-0.0533240139618846,3.352475197537  
38,-0.0159058638229612,0.987309491940711,NA  
"16407","AC073257.2",0.220042982661301,-0.774663427007579,3.3524751975  
3738,-0.231072082972194,0.817258802814834,NA  
"16408","AC073257.1",0.233061356241168,-0.774663445836492,3.3508580764  
8355,-0.231183603767975,0.817172167312465,NA  
"16409","TFCP2L1",0.203054089861245,-1.95461545718866,3.33573296423696  
, -0.585962808817275,0.557900507779092,NA  
"16410","AC012447.1",0.100823152638361,-1.35173207482145,3.35247519753  
738,-0.40320419844251,0.686798011343181,NA  
"16411","AC011246.1",1.69278057197912,-0.764295822087061,1.19015227627  
335,-0.642183220856623,0.52075422623334,NA  
"16412","AC012508.2",0.154285403418625,-0.774663427007578,3.3524751975  
3738,-0.231072082972193,0.817258802814835,NA  
"16413","AC012508.1",0.0644961186387932,-0.0533240139618838,3.35247519  
753738,-0.015905863822961,0.987309491940711,NA  
"16414","AC110926.2",0.106924501560529,0.385965786494404,3.34626872025  
989,0.115342137395477,0.908173940404949,NA  
"16415","AC068282.1",0.23843966004588,0.69583062743856,3.3374714942975  
1,0.208490358233014,0.834846110249776,NA  
"16416","AC068282.2",0.44207047104394,-0.953743253576691,2.15481320550  
325,-0.442610640746442,0.658047386860537,NA  
"16417","PROC",0.142120095111522,-0.0533240139618842,3.35247519753738,  
-0.0159058638229611,0.987309491940711,NA  
"16418","AC010976.1",0.309302485770796,1.17088912763199,2.661838949102  
63,0.439879778611974,0.660024182340411,NA  
"16419","MY07B",0.570889799892612,-0.54616978041725,2.03839609330458,-  
0.267940947400374,0.78874477420159,NA  
"16420","AC010976.2",0.273505233441565,-0.226106766776126,2.7449021822  
0006,-0.082373342205914,0.934349833830783,NA  
"16421","LINC02572",0.549596631382708,0.966326513812169,2.027927187349  
67,0.47650947225333,0.633711460690127,NA  
"16422","RAB6C",0.4173584277799,0.678545480277549,2.46825583533512,0.2  
74908893382772,0.7833862343782,NA  
"16423","AC073869.3",0.183715948661733,0.576034712544328,3.34068880739

852,0.172429922616139,0.863099549623161,NA  
"16424","AC093787.2",0.82934740013991,1.52909169060165,1.7150024981633  
7,0.891597354662275,0.372608788568835,NA  
"16425","AC097532.2",0.166727055861678,-0.774663427007578,3.3524751975  
3738,-0.231072082972193,0.817258802814835,NA  
"16426","AC097532.3",0.569380950301376,2.1028379963893,1.9796130176151  
6,1.06224700367075,0.288123566432277,NA  
"16427","GPR39",1.20121591488053,2.40562650202756,1.71508731162359,1.4  
0262626032156,0.160728316784154,NA  
"16428","LYPD1",0.102686272020481,-0.0533240139618846,3.35247519753738  
, -0.0159058638229612,0.987309491940711,NA  
"16429","AC092623.1",0,NA,NA,NA,NA,NA  
"16430","TMEM163",0.102686272020481,-0.0533240139618846,3.352475197537  
38,-0.0159058638229612,0.987309491940711,NA  
"16431","AC110620.2",0,NA,NA,NA,NA,NA  
"16432","MAP3K19",0,NA,NA,NA,NA,NA  
"16433","AC011893.1",0,NA,NA,NA,NA,NA  
"16434","DARS-  
AS1",0.390202142256741,0.602045180891302,2.46209679175779,0.2445253910  
84028,0.806823939466615,NA  
"16435","AC068492.1",0,NA,NA,NA,NA,NA  
"16436","THSD7B",0.102686272020481,-0.0533240139618846,3.3524751975373  
8,-0.0159058638229612,0.987309491940711,NA  
"16437","AC114763.1",2.33453564246859,-0.414857413884229,1.20760733941  
913,-0.343536678142233,0.731194752652524,NA  
"16438","LINC02631",0.369781145722923,-1.7945647392599,2.4874302731430  
6,-0.721453283991886,0.470630673231099,NA  
"16439","AC079793.1",0.304332577297202,-1.37410761592356,3.09443671322  
021,-0.444057430566612,0.657001062693595,NA  
"16440","AC092652.3",0.172682080803205,0.494635591052761,3.34300496985  
029,0.147961368742719,0.882373255878367,NA  
"16441","AC092652.1",0,NA,NA,NA,NA,NA  
"16442","AC092652.2",0.142120095111522,-0.0533240139618842,3.352475197  
53738,-0.0159058638229611,0.987309491940711,NA  
"16443","AC016910.1",1.6209153580985,2.12111666488859,1.32437164685833  
,1.60160229186444,0.10924358369405,NA  
"16444","AC009951.5",0.102686272020481,-0.0533240139618846,3.352475197  
53738,-0.0159058638229612,0.987309491940711,NA  
"16445","LINC01412",2.34289723399261,-0.281995190802105,0.978156877459  
504,-0.288292396956316,0.773122926570204,NA  
"16446","AC018678.1",0.205372544040962,0.695830627438559,3.33747149429  
751,0.208490358233014,0.834846110249776,NA  
"16447","AC105402.3",0,NA,NA,NA,NA,NA  
"16448","LYPD6B",0.160386752340794,0.715986771710925,3.33695183420161,  
0.214563112470645,0.830107956063492,NA  
"16449","LYPD6",0.745442869514633,0.709530554854527,1.92727817935614,0  
.368151604918582,0.712760193632864,NA  
"16450","LINC02612",0,NA,NA,NA,NA,NA  
"16451","AC079790.2",0.375762788798422,-0.225710046048203,2.5105532565  
7251,-0.0899045042989249,0.928363101737299,NA

"16452","AC012066.2",0.520174719955689,1.95616560566392,2.062885098994  
55,0.948266874687958,0.342993609903603,NA  
"16453","AC012443.2",0.68099040352884,2.37569210060777,1.9182397199270  
4,1.23847508521934,0.215539954710914,NA  
"16454","RPRM",0.892631352837406,-1.03477038329207,2.07195259767284,-0  
.499417981113226,0.617484954404084,NA  
"16455","AC073225.1",1.21672036994159,2.35387664081106,1.8509874030199  
3,1.27168701254836,0.203484346896514,NA  
"16456","LINC01876",0.0644961186387932,-0.0533240139618838,3.352475197  
53738,-0.015905863822961,0.987309491940711,NA  
"16457","AC074099.1",0.102686272020481,-0.0533240139618846,3.352475197  
53738,-0.0159058638229612,0.987309491940711,NA  
"16458","ERMN",0.700783879525948,1.46522284447086,1.97262312519845,0.7  
42778904776073,0.457615549170672,NA  
"16459","ACVR1C",1.07560168944058,0.679174602191746,1.63482189228266,0  
.415442566188928,0.677817951460661,NA  
"16460","AC019186.1",0.589850746518195,-1.42501090271909,1.84580423564  
594,-0.772027106233402,0.440098373308005,NA  
"16461","UPP2",0.362053593518754,0.143931775625763,2.98640704900717,0.  
0481956321639453,0.96156033117261,NA  
"16462","AC013731.1",0.654896968159832,-1.40522033213501,1.75698242203  
711,-0.799791912832994,0.423831369390497,NA  
"16463","CCDC148",2.18705364750667,-0.578952399541089,1.02022504452508  
, -0.56747518858508,0.570391378966443,NA  
"16464","PKP4-AS1",0,NA,NA,NA,NA,NA  
"16465","AC008277.1",0.410289753284328,0.547543542914136,2.92149338898  
395,0.18741905936832,0.85133208015149,NA  
"16466","LINC01806",0.102686272020481,-0.0533240139618846,3.3524751975  
3738,-0.0159058638229612,0.987309491940711,NA  
"16467","TBR1",0.117958369419058,0.451348601316665,3.34428110054629,0.  
134961322851401,0.892642454377335,NA  
"16468","SLC4A10",0.980055589314256,0.0588586938506707,2.0277950930971  
5,0.0290259573321942,0.976843888355701,NA  
"16469","AC007750.1",0.494982618821362,0.374388275009055,2.12525678702  
168,0.176161430136506,0.860167121161149,NA  
"16470","GRB14",0.411533422993681,0.431173404665129,2.22551876595861,0  
.193740628594254,0.84637897750817,NA  
"16471","AC019197.1",0.154285403418625,-0.774663427007578,3.3524751975  
3738,-0.231072082972193,0.817258802814835,NA  
"16472","SLC38A11",0,NA,NA,NA,NA,NA  
"16473","SCN3A",0.11921983002294,-0.0533240139618846,3.35247519753738,  
-0.0159058638229612,0.987309491940711,NA  
"16474","SCN2A",0.427278646084383,1.70712042304806,2.85122212164452,0.  
598732876715838,0.549351029677302,NA  
"16475","CSRP3",0.319604674695779,-0.87023804472743,2.6537153836642,-  
0.327931944052652,0.742963120211237,NA  
"16476","GALNT3",2.2436411499363,0.0569208731550717,0.98990048331685,0  
.0575016116411496,0.954145622330696,NA  
"16477","AC009495.3",0,NA,NA,NA,NA,NA  
"16478","TTC21B-

AS1",0.527482349049977,-0.142990433014554,2.12530221124961,-0.06728004  
71658475,0.946358760946984,NA  
"16479","SCN9A",1.5956541029956,-2.92868098830388,1.3573603803976,-2.1  
5762963955528,0.0309566383535362,NA  
"16480","B3GALT1",0.37518145135269,-0.153942501950355,2.52238095681358  
, -0.0610306312115614,0.951334814337818,NA  
"16481","CERS6-  
AS1",0.204917209243366,-0.774663427007578,3.35247519753738,-0.23107208  
2972194,0.817258802814834,NA  
"16482","SPC25",0.322729254681782,-0.0522366723701696,2.65678688704254  
, -0.0196615967298446,0.984313326223208,NA  
"16483","KLHL41",2.06306124695941,-0.455708035869426,0.992826799314694  
, -0.459000538849255,0.646233779124693,NA  
"16484","AC007405.2",0,NA,NA,NA,NA,NA  
"16485","AC007405.4",0,NA,NA,NA,NA,NA  
"16486","AC010092.1",0.309302485770796,1.17088912763199,2.661838949102  
63,0.439879778611974,0.660024182340411,NA  
"16487","DLX1",0.102230937222884,-1.35173207482145,3.35247519753738,-0  
.403204198442509,0.686798011343181,NA  
"16488","DLX2",0.474305599484101,-1.97441555239015,2.07795404124892,-0  
.950172868695141,0.342024422114431,NA  
"16489","ITGA6",1.88129234831405,0.173731965053071,1.13587597011984,0.  
152949767072493,0.878437889137363,NA  
"16490","ITGA6-  
AS1",1.30979470069906,-0.582182253711548,1.26902341146392,-0.458763997  
931256,0.646403650814318,NA  
"16491","AC078883.1",1.23948988109938,-1.20911165722384,1.250374210934  
72,-0.966999836248994,0.333544115523501,NA  
"16492","MAP3K20-  
AS1",1.29190685805129,1.67484919679935,1.57636748200574,1.062473830447  
4,0.288020632180979,NA  
"16493","CDCA7",1.05415285358563,-0.636024071421004,1.40559826732888,-  
0.452493494197078,0.650913506994176,NA  
"16494","AC016737.1",0,NA,NA,NA,NA,NA  
"16495","AC016737.2",0.394132848049029,0.436200404954529,2.52699059775  
496,0.172616552409043,0.862952840268597,NA  
"16496","LINC01305",2.20630211620892,2.44940699388271,1.43163946247532  
,1.71091050371555,0.0870976353061465,NA  
"16497","SP9",0.322300538018157,-0.774667165166207,3.0144598883595,-0.  
256983736342828,0.797191328075268,NA  
"16498","AC010894.2",2.20031697320585,-0.493215140766298,0.94639979162  
8265,-0.521148826457083,0.602263099554281,NA  
"16499","AC010894.3",0.11921983002294,-0.0533240139618846,3.3524751975  
3738,-0.0159058638229612,0.987309491940711,NA  
"16500","CHRNA1",0,NA,NA,NA,NA,NA  
"16501","EVX2",0.365759296381756,1.5417386961623,2.89974975000726,0.53  
1679913467859,0.594947706152603,NA  
"16502","HOXD13",0.308058816061443,1.2759273050851,3.31959886931736,0.  
384361892901681,0.700710240394097,NA  
"16503","HOXD11",1.2607187081592,0.945197630998406,2.39164462440799,0.

395208226737437,0.692689221792866,NA  
"16504","HOXD10",0.410745088081924,1.66416763505049,3.3004354676269,0.  
504226685046224,0.614102090381297,NA  
"16505","HAGLR",0.808387231744166,0.727848060104767,1.69253625366485,0.  
.430033955567425,0.66717094116788,NA  
"16506","HAGLROS",0.0644961186387932,-0.0533240139618838,3.35247519753  
738,-0.015905863822961,0.987309491940711,NA  
"16507","HOXD1",0.499914923188989,-0.239580629461308,2.13068974565348,  
-0.11244275706965,0.910472355026477,NA  
"16508","AC092162.2",0.11921983002294,-0.0533240139618846,3.3524751975  
3738,-0.0159058638229612,0.987309491940711,NA  
"16509","AC074286.1",0,NA,NA,NA,NA,NA  
"16510","AC019080.4",0,NA,NA,NA,NA,NA  
"16511","AC019080.5",0.338834096020616,-0.774667674034573,2.9654685095  
3071,-0.261229438635032,0.793915577320881,NA  
"16512","AC019080.6",2.16534586240358,1.12349844960978,1.1463630549770  
9,0.980054656098655,0.3270591400902,NA  
"16513","PDE11A",1.94698283947278,-1.91093603483577,1.03621705537644,-  
1.84414647965967,0.06516179572058,NA  
"16514","AC010680.4",1.6779069388312,1.12266736181316,1.28115689275201  
,0.876291864146005,0.38087138683603,NA  
"16515","AC010680.5",0.142120095111522,-0.0533240139618842,3.352475197  
53738,-0.0159058638229611,0.987309491940711,NA  
"16516","AC010680.1",0.639515936317848,1.09397138273811,1.824701528004  
42,0.599534425739493,0.548816560426856,NA  
"16517","CCDC141",0.332046327138831,-0.817664541082363,2.6219765132401  
7,-0.311850444484689,0.755154185163877,NA  
"16518","SCHLAP1",1.84059667785929,-4.12959398114764,1.44938580864257,  
-2.84920271505572,0.00438289447589688,NA  
"16519","AC104076.1",0.117958369419058,0.451348601316665,3.34428110054  
629,0.134961322851401,0.892642454377335,NA  
"16520","AC068196.1",0.427400032423602,0.364893102346719,2.45935146715  
631,0.148369644282131,0.882051055250296,NA  
"16521","LINC01934",1.45182288788231,-0.0634863511747741,1.15494307090  
225,-0.0549692472072915,0.956162963909142,NA  
"16522","CERKL",0.102686272020481,-0.0533240139618846,3.35247519753738  
, -0.0159058638229612,0.987309491940711,NA  
"16523","AC009962.1",0.581685435842227,-0.107794491706875,2.0232903511  
0903,-0.0532768278402501,0.957511342679724,NA  
"16524","AC012500.1",0,NA,NA,NA,NA,NA  
"16525","AC021851.2",0.581481507539157,-2.12941889937744,2.22569407887  
962,-0.956743749998814,0.338696609971097,NA  
"16526","AC096667.1",0.953720305383859,-0.613232554025186,1.4390557502  
6063,-0.426135369608942,0.670009208590607,NA  
"16527","ZNF804A",0.474722822054662,-2.03761344833073,2.33935612575005  
, -0.871014646253324,0.383746156091564,NA  
"16528","FSIP2-  
AS1",2.26499115097629,-0.872293571073935,1.30874963760545,-0.666509121  
385453,0.505085735431251,NA  
"16529","FSIP2-

AS2",0.671295729960412,-0.849117339453689,1.80843491818189,-0.46953159  
9349646,0.638689703541115,NA  
"16530","DIRC1",1.25444215296941,-0.191070082452105,1.48102279615023,-  
0.129012249472981,0.897347956155701,NA  
"16531","AC133106.1",1.51645532347787,-0.0766210096539442,1.4581146006  
217,-0.052548002482984,0.958092047690945,NA  
"16532","OSGEPL1-  
AS1",0.313540715310845,1.26351236233866,2.5977368350737,0.486389670146  
404,0.62669091310095,NA  
"16533","AC013468.1",0.64983866114407,-0.348047856515891,2.25634917344  
723,-0.154252657616882,0.877410524207198,NA  
"16534","MSTN",1.00570032470686,1.31267268866768,1.58326709404273,0.82  
9091120258107,0.407052848034186,NA  
"16535","AC006460.1",0,NA,NA,NA,NA,NA  
"16536","AC005540.1",0.646042377247273,1.39690375670198,1.766217697879  
65,0.790901233963949,0.429001628272548,NA  
"16537","AC067945.3",0,NA,NA,NA,NA,NA  
"16538","AC067945.4",0,NA,NA,NA,NA,NA  
"16539","AC092614.1",0.650094469378779,0.0365121872450043,1.7163863276  
0168,0.0212727092134456,0.983028113804527,NA  
"16540","AC098617.1",0,NA,NA,NA,NA,NA  
"16541","TMEFF2",0.387346759659794,-0.990622673409685,2.22889911013911  
, -0.444444824309637,0.656721011979128,NA  
"16542","AC096647.1",1.03523193495668,0.351055930497814,1.444303251676  
76,0.243062480189155,0.807956996179595,NA  
"16543","LINC01821",0,NA,NA,NA,NA,NA  
"16544","LINC01825",0.541459469218236,-2.9452539702196,2.5759599468481  
3,-1.14336171019403,0.252888443169467,NA  
"16545","LINC01827",0,NA,NA,NA,NA,NA  
"16546","HECW2-  
AS1",0.35765949006882,1.43749688423347,3.31232068124828,0.433984816860  
106,0.664299466649274,NA  
"16547","C2orf66",0.685493991232843,1.40200451560784,1.68052944254422,  
0.834263583912751,0.404132467876969,NA  
"16548","AC013264.1",0.417488447935208,1.62697571789112,2.182440750832  
19,0.745484484410737,0.455978887347416,NA  
"16549","ANKRD44-  
IT1",0.80347015154643,1.6976168800797,1.93597365709875,0.8768801547763  
57,0.380551736332292,NA  
"16550","AC011997.1",0.573506950580646,1.21964244450997,2.270115612947  
81,0.537260057396913,0.591087991688578,NA  
"16551","AC011997.2",0,NA,NA,NA,NA,NA  
"16552","FTCDNL1",1.68313297969575,0.827501381476591,1.42708032743231,  
0.579856204006038,0.56201159209098,NA  
"16553","AC097717.1",0.95289787575224,0.468166721593229,1.692282199244  
44,0.276648139301031,0.782050296901902,NA  
"16554","LINC01792",0,NA,NA,NA,NA,NA  
"16555","AC005037.1",0.680921813234417,-0.814759551896656,1.6921243040  
2489,-0.481501004363962,0.630160466076552,NA  
"16556","AC007272.1",0.625487508628624,0.982953327189717,2.04279582732

971,0.481180406793079,0.630388284943499,NA  
"16557","CFLAR-  
AS1",2.06256075828056,2.31609491693682,1.38355406288844,1.674018369836  
25,0.0941269891450101,NA  
"16558","FLACC1",1.10252710437045,1.35298848328583,1.42111208191603,0.  
952063176791551,0.341064942570891,NA  
"16559","AC007279.2",0.607991401099332,0.0896024716782367,1.7962895353  
0409,0.0498819761052985,0.960216440405669,NA  
"16560","MPP4",1.65061216375523,-0.662146110289953,1.20752715494028,-0  
.548348836364428,0.583452400302451,NA  
"16561","KIAA2012",0.832555254238095,0.0630620657933023,1.758430640068  
66,0.0358626973144871,0.971391839952161,NA  
"16562","KIAA2012-  
AS1",1.4190376564393,0.743469485582334,1.26861061740237,0.586050183865  
461,0.557841791524838,NA  
"16563","AC079354.3",0.827163506885025,-1.55591103668647,1.72457821702  
026,-0.902198010696659,0.366951691392625,NA  
"16564","AC079354.2",0.37573617066445,-0.843172790991496,2.24094932849  
463,-0.376256964077765,0.706725870194141,NA  
"16565","AC064836.2",0.285946885884618,-0.151037280028445,2.7227218464  
1806,-0.0554729012172675,0.955761718393871,NA  
"16566","CD28",1.89776555698737,-0.468190009559707,1.14110391142786,-0  
.410295683741776,0.681589057946142,NA  
"16567","ICOS",1.64040366250375,1.39351360853971,1.21035768245527,1.15  
132380183097,0.249599048630924,NA  
"16568","AC009498.1",0.634810877887139,-1.18818581439725,2.27760512481  
384,-0.521682095571489,0.601891692813259,NA  
"16569","AC007679.1",0,NA,NA,NA,NA  
"16570","AC007383.3",0.693634149698656,-0.21673138962613,2.19659208261  
323,-0.0986671086277839,0.921402584909703,NA  
"16571","GPR1-  
AS",0.924748389755719,1.91177969912312,1.69129741636015,1.130362809420  
87,0.258323378411014,NA  
"16572","CP0",1.0015695298366,0.832111572752854,1.52192413609881,0.546  
749705202672,0.584550700740478,NA  
"16573","AC007879.3",0.669241553412904,0.622589172207593,1.92705934638  
019,0.323077321607699,0.746636684802367,NA  
"16574","AC007879.2",1.19245523654504,2.09513518518232,1.5608361002429  
8,1.34231594518871,0.179493575516732,NA  
"16575","AC009226.1",0,NA,NA,NA,NA  
"16576","LINC01857",0.421260571274397,-2.6213330357122,2.7448579230317  
2,-0.954997711800293,0.339578854113535,NA  
"16577","AC096772.1",0.204917209243366,-0.774663427007578,3.3524751975  
3738,-0.231072082972194,0.817258802814834,NA  
"16578","AC083900.1",0.204917209243366,-0.774663427007578,3.3524751975  
3738,-0.231072082972194,0.817258802814834,NA  
"16579","AC019185.2",0.0534622507802646,-0.0533240139618838,3.35247519  
753738,-0.015905863822961,0.987309491940711,NA  
"16580","MAP2",2.16998039437994,1.33764688493387,1.13622115196352,1.17  
727687310015,0.239085014544721,NA

"16581","MYL1",0.233061356241168,-0.774663445836492,3.35085807648355,-  
0.231183603767975,0.817172167312465,NA  
"16582","LINC01878",0,NA,NA,NA,NA,NA  
"16583","AC108066.2",0.415394457959801,1.70916804331239,2.433691072736  
73,0.702294577343542,0.482495474314805,NA  
"16584","SNHG31",0.968994083274985,-1.33747643246432,1.62168571036017,  
-0.824744538303461,0.409516640040102,NA  
"16585","AC093382.1",0.539257052920491,-0.330753485954016,2.0939085779  
7636,-0.157959850507738,0.874488436104351,NA  
"16586","TMEM169",0.788692254029131,0.135269216942441,1.71774693464382  
,0.0787480473487149,0.937233027853934,NA  
"16587","AC098820.1",0.736983638376919,0.54701059193074,1.730479502409  
39,0.316103479509075,0.751923965788186,NA  
"16588","AC098820.3",0.393326722242743,1.64399951364785,2.145229623362  
61,0.766351301391646,0.443467300857864,NA  
"16589","IGFBP2",2.32450110919649,-0.790716115046689,1.12863918298372,  
-0.700592471861837,0.483557377844443,NA  
"16590","AC007563.4",2.19747117276921,1.02516367794383,1.2988933919451  
7,0.789259291256068,0.429960474382,NA  
"16591","LINC01921",0.335747628261649,-0.152785461477589,2.59628749910  
255,-0.0588476667281267,0.953073441659929,NA  
"16592","AC007749.1",0.244806367132003,0.695807100884759,3.33664907448  
574,0.208534696143316,0.834811494458112,NA  
"16593","AC007749.2",0.802442306542545,1.54611952535131,1.725129306605  
17,0.896233992102231,0.370127804544011,NA  
"16594","RUFY4",0.100823152638361,-1.35173207482145,3.35247519753738,-  
0.40320419844251,0.686798011343181,NA  
"16595","CXCR2",1.49168417936368,1.4132939323411,1.54474924051681,0.91  
4901846378817,0.360243160678505,NA  
"16596","CXCR1",0.656365102073495,0.236601252672339,2.28200963393079,0  
.103681092820274,0.917422431521495,NA  
"16597","CATIP",0.0644961186387932,-0.0533240139618838,3.3524751975373  
8,-0.015905863822961,0.987309491940711,NA  
"16598","CATIP-  
AS1",0.221450767245824,-0.774663427007578,3.35247519753738,-0.23107208  
2972194,0.817258802814834,NA  
"16599","AC021016.3",1.03971989049871,0.696953630334117,1.443991084619  
69,0.482657848623544,0.629338696998325,NA  
"16600","VIL1",1.85625582095484,-0.782402222846189,1.32489076445401,-0  
.590540928986413,0.554828054316014,NA  
"16601","AC009974.2",0.982570277560629,1.98968396973238,2.140538228916  
89,0.929525080586461,0.352617033586924,NA  
"16602","AC009974.1",2.111749335602,-0.871417970242721,1.0291138629643  
7,-0.846765359600344,0.397125919905081,NA  
"16603","PRKAG3",0.753236076196857,1.39926792998098,1.65539696552655,0  
.845276365198544,0.397956553888168,NA  
"16604","WNT10A",0.37161932746362,-2.54631963334905,2.44752279458951,-  
1.04036605459934,0.298169866259589,NA  
"16605","AC097468.4",0.142120095111522,-0.0533240139618842,3.352475197  
53738,-0.0159058638229611,0.987309491940711,NA



"16606","PTPRN",0.592124791669411,0.28209674839936,1.84917542004465,0.152552724496278,0.878751008882346,NA  
"16607","AC053503.2",0.668960433230384,1.38627755721687,1.8204733924818,0.761492896815702,0.446362719932177,NA  
"16608","DES",0.439816747225231,-1.78484417951464,2.78975505408687,-0.639785266057649,0.522312212780898,NA  
"16609","SPEG",0.969864939442278,-1.22723994632829,1.63548410262457,-0.75038329284819,0.453023890288918,NA  
"16610","AC053503.5",1.48770971112519,-1.31867206003204,1.37958692435359,-0.955845577218637,0.339150257876318,NA  
"16611","ASIC4",0.221450767245824,-0.774663427007578,3.35247519753738,-0.231072082972194,0.817258802814834,NA  
"16612","AC009955.4",0.102230937222884,-1.35173207482145,3.35247519753738,-0.403204198442509,0.686798011343181,NA  
"16613","INHA",0.224882870979587,1.01003906181063,3.32983728260984,0.303329855511435,0.7616384958927,NA  
"16614","AC093843.1",0.927239453848321,-3.08624105713662,1.99203989602352,-1.54928677045943,0.121312798577956,NA  
"16615","AC093843.2",0.220042982661301,-0.774663427007579,3.35247519753738,-0.231072082972194,0.817258802814834,NA  
"16616","AC079834.2",1.6284107495408,-1.27362286281487,1.20132587652073,-1.06018099477181,0.289062265598126,NA  
"16617","AC010980.1",0.504884831662583,1.90722757570076,2.06817659574534,0.922178299292388,0.356435580452089,NA  
"16618","SGPP2",1.11378543643329,3.10182367643814,1.7165464460645,1.8070141262706,0.0707600766688871,NA  
"16619","MOGAT1",0.102686272020481,-0.0533240139618846,3.35247519753738,-0.0159058638229612,0.987309491940711,NA  
"16620","SCG2",5.78390895217775,1.44192495333452,1.80076365932063,0.80072970479564,NA,NA  
"16621","FAM124B",0.244806367132003,0.695807100884759,3.33664907448574,0.208534696143316,0.834811494458112,NA  
"16622","AC073052.2",0.142120095111522,-0.0533240139618842,3.35247519753738,-0.0159058638229611,0.987309491940711,NA  
"16623","NYAP2",0,NA,NA,NA,NA,NA,NA  
"16624","AC010735.2",0.642756597494152,0.411871947490089,2.00659138818412,0.205259501219537,0.837369383693183,NA  
"16625","AC010735.1",0,NA,NA,NA,NA,NA,NA  
"16626","COL4A3",1.81114929006587,-1.88181965187248,1.60701618088941,-1.17100230492451,0.241597850673912,NA  
"16627","AC064853.1",0,NA,NA,NA,NA,NA,NA  
"16628","SCYGR4",0.102686272020481,-0.0533240139618846,3.35247519753738,-0.0159058638229612,0.987309491940711,NA  
"16629","DAW1",0.974424450976161,0.0737235262594179,2.0300982346051,0.0363152506626158,0.97103098969058,NA  
"16630","LINC01807",2.22647297452056,0.641710803101956,1.22226623039673,0.525017207497964,0.5995712289148,NA  
"16631","AC008273.1",1.98226168453594,-0.368524897288857,1.03642770823081,-0.355572216337146,0.72216095369645,NA  
"16632","SP140",1.83022299858625,-0.218279759034286,1.13174194446068,-

0.192870609861779,0.847060302778737,NA  
"16633","LINC01907",0.172682080803205,0.494635591052761,3.343004969850  
29,0.147961368742719,0.882373255878367,NA  
"16634","GPR55",0.275368352823686,1.11865680170283,2.73977894622596,0.  
408301846119294,0.683052084109357,NA  
"16635","AC017104.1",2.14855756615763,-0.221749909675246,1.07796262943  
07,-0.205712056819963,0.837015840004735,NA  
"16636","B3GNT7",1.30756591452177,-0.0597865037491476,1.33120932871895  
,-0.0449114218623164,0.964177912702472,NA  
"16637","AC017104.3",0,NA,NA,NA,NA,NA  
"16638","LINC00471",1.20817384150177,2.28904782130727,1.53177053508954  
 ,1.49438037151789,0.135076228933935,NA  
"16639","AC017104.6",0.271112332389108,0.99816176680834,3.203674282550  
25,0.31156780583005,0.755369004332501,NA  
"16640","AC073476.3",0.763229254304885,-0.860606361788739,1.6591060732  
9568,-0.518716901613899,0.603958173619756,NA  
"16641","NPPC",1.72088544898295,2.92979859927213,1.829616952161,1.6013  
1802222956,0.109306499318964,NA  
"16642","CHRNA",0,NA,NA,NA,NA,NA  
"16643","KCNJ13",0.284240190223044,0.69583062743856,3.33747149429751,0  
 .208490358233014,0.834846110249776,NA  
"16644","SNORC",0.761565287179264,0.73700898541385,1.92383716534313,0.  
383093225710918,0.701650642299265,NA  
"16645","SAG",0,NA,NA,NA,NA,NA  
"16646","HJURP",0.462986230411184,-0.671671725240002,2.44611387809593,  
-0.274587267279165,0.783633349693561,NA  
"16647","AC097713.3",0,NA,NA,NA,NA,NA  
"16648","AC010148.1",0.738085365137499,-0.0672680537324946,1.979559234  
82413,-0.0339813290499846,0.972892039361666,NA  
"16649","AGAP1-  
IT1",1.46859627665588,1.87473186269342,1.47751515471232,1.268841038086  
29,0.204497765157855,NA  
"16650","AC084030.1",2.30307919683638,0.76089787663709,1.0688926278713  
2,0.711856230267395,0.4765538084584,NA  
"16651","AC105760.1",0.777359689662286,0.227606160948228,1.80728145299  
744,0.125938414612033,0.899780674281176,NA  
"16652","AC107079.1",0.387225373320575,0.432745280435859,2.25351193869  
682,0.19203150114488,0.847717530254065,NA  
"16653","RBM44",2.30290901574606,-1.05131011282653,1.01060307576987,-1  
 .04027994573997,0.298209858481279,NA  
"16654","RAMP1",0.898638998068489,1.97866851780602,1.82476970998462,1.  
08433875627117,0.278214627349458,NA  
"16655","ERFE",0.684034899127355,-1.03756739626321,2.27844513503924,-0  
 .455383972300627,0.648833023935717,NA  
"16656","LINC02610",1.29752577580189,0.0208061740544112,1.433565804029  
27,0.0145135814456038,0.988420243978469,NA  
"16657","AC012485.1",0,NA,NA,NA,NA,NA  
"16658","LINC01940",0,NA,NA,NA,NA,NA  
"16659","AC017028.1",0.529509583307268,0.971374629263717,2.38639657482  
521,0.407046607219868,0.683973757247381,NA

"16660", "AC017028.2", 0.102686272020481, -0.0533240139618846, 3.35247519753738, -0.0159058638229612, 0.987309491940711, NA  
"16661", "AC093802.1", 0, NA, NA, NA, NA, NA  
"16662", "AC110619.1", 0.100823152638361, -1.35173207482145, 3.35247519753738, -0.40320419844251, 0.686798011343181, NA  
"16663", "GPR35", 1.05837182630733, -0.270297581567036, 1.55972365594792, -0.173298379194463, 0.862416897633464, NA  
"16664", "CROCC2", 1.54294243552822, 2.57226093250307, 1.46144812161021, 1.76007679948911, 0.0783947858925083, NA  
"16665", "AC104809.2", 0.338147676061, 0.362393738434311, 2.57090127804968, 0.140959803290941, 0.887901697530707, NA  
"16666", "AC104809.1", 0.750822639243161, 1.57767349315981, 1.89837331242155, 0.831065988357864, 0.405936352262863, NA  
"16667", "AC005237.1", 0.731155888583989, -0.095719075072232, 1.97353090977493, -0.0485014319249492, 0.961316623275502, NA  
"16668", "AC104841.1", 0, NA, NA, NA, NA, NA  
"16669", "BOK-AS1", 0.102230937222884, -1.35173207482145, 3.35247519753738, -0.403204198442509, 0.686798011343181, NA  
"16670", "AC133528.1", 0.205372544040962, 0.695830627438559, 3.33747149429751, 0.208490358233014, 0.834846110249776, NA  
"16671", "AC114730.2", 1.40994922427233, -0.364217746992862, 1.21286741576568, -0.300294774398677, 0.763952318838986, NA  
"16672", "GAL3ST2", 0, NA, NA, NA, NA, NA  
"16673", "AC131097.1", 0, NA, NA, NA, NA, NA  
"16674", "NEU4", 0.407515964307014, -2.69783943182482, 2.74797011065332, -0.981757196472349, 0.326219479982067, NA  
"16675", "AC131097.3", 0, NA, NA, NA, NA, NA  
"16676", "PDCD1", 1.38349544796539, -0.664867400006999, 1.23640084480589, -0.537744213618183, 0.59075365050028, NA  
"16677", "RTP5", 0, NA, NA, NA, NA, NA  
"16678", "LINC01237", 0.664670139793871, 0.967306483793899, 2.01858068738435, 0.479201297148702, 0.631795431540147, NA  
"16679", "FAM240C", 0.102686272020481, -0.0533240139618846, 3.35247519753738, -0.0159058638229612, 0.987309491940711, NA  
"16680", "LINC01238", 0.787538252322209, 2.6205376948153, 2.10948487014117, 1.24226427594142, 0.214139071414377, NA  
"16681", "LINC01238.1", 0.768753882090238, 0.160165178105911, 1.85900870282015, 0.0861562282430079, 0.931342226071217, NA  
"16682", "CHL1-AS1", 0.117958369419058, 0.451348601316665, 3.34428110054629, 0.134961322851401, 0.892642454377335, NA  
"16683", "AC087430.1", 0.523580420124212, 2.02462726630625, 2.0015912973338, 1.01150882750296, 0.311772958273632, NA  
"16684", "CNTN6", 0, NA, NA, NA, NA, NA  
"16685", "AC087427.1", 0.364026197154943, 1.40568518917529, 2.5808230723278, 0.544665461281472, 0.585983623575459, NA  
"16686", "IL5RA", 0.219614265997676, -1.35173207482145, 3.35247519753738, -0.40320419844251, 0.686798011343181, NA  
"16687", "LRRN1", 0.128992237277586, 0.513744972953418, 3.34245151459318, 0

.153703044220807,0.877843884367224,NA  
"16688","AC023480.1",0.347492639152484,1.36515954890128,3.017275334969  
29,0.452447787273339,0.650946427429436,NA  
"16689","AC023483.1",0.698465425346231,-0.237713606590316,1.7855272590  
2405,-0.133133563427224,0.89408775162841,NA  
"16690","ITPR1-  
DT",0.912831193125771,-0.684596438120838,1.55610190240146,-0.439943192  
06495,0.659978252105139,NA  
"16691","AC026202.2",1.00696413746665,1.18889603651407,1.5110953255635  
9,0.786777654858177,0.431412036317537,NA  
"16692","AC026202.3",0.42450485710707,-1.79990639381482,2.390132034216  
42,-0.753057307315203,0.451415477733895,NA  
"16693","AC069277.1",0.504115763191804,-2.97556230087552,3.09040914245  
38,-0.962837657965544,0.335628999206986,NA  
"16694","GRM7",0.868087656524441,0.791549576180682,1.57944583319929,0.  
501156519294706,0.616260972351432,NA  
"16695","AC066585.1",0,NA,NA,NA,NA,NA  
"16696","GRM7-AS1",0,NA,NA,NA,NA,NA  
"16697","AC077690.1",0.286402220682214,1.17253773374183,2.717676205167  
14,0.431448651429658,0.666142181249859,NA  
"16698","CAV3",1.25025323576006,1.31714251570872,1.68240500826751,0.78  
289265024542,0.433690153873616,NA  
"16699","OXTR",1.95891035041137,-0.413759085637753,1.13761705215767,-0  
.363706824588286,0.716076946617046,NA  
"16700","AC026191.1",0.684623114357234,-0.37116918787915,2.26582401117  
16,-0.163812011016349,0.86987913598886,NA  
"16701","LHFPL4",0.723787954627953,-0.265352158618745,1.99728331381352  
, -0.132856544078413,0.894306834957835,NA  
"16702","AC022382.2",0.414527982824376,0.61066848644143,2.453830896228  
2,0.248863313026212,0.803466514579085,NA  
"16703","CPNE9",0.286523607021433,-0.265776410372375,2.71200358897697,  
-0.0980000216270479,0.921932276195533,NA  
"16704","CIDEA",1.87629038913784,-1.63104822132619,1.12812959433687,-1  
.44579862944287,0.148233690650842,NA  
"16705","AC018809.1",0.61385583392138,-1.99639009142716,2.151957790018  
4,-0.927708759292202,0.353558663575619,NA  
"16706","AC034193.1",0.298268617912268,1.11711823327978,2.679020476598  
25,0.416987568045118,0.676687501005877,NA  
"16707","GHRL0S",2.16978013972432,-0.403704501475798,0.930022884017421  
, -0.434080180620841,0.664230217200725,NA  
"16708","SLC6A1",0,NA,NA,NA,NA,NA  
"16709","AC022001.2",0.142120095111522,-0.0533240139618842,3.352475197  
53738,-0.0159058638229611,0.987309491940711,NA  
"16710","AC022001.3",0.102686272020481,-0.0533240139618846,3.352475197  
53738,-0.0159058638229612,0.987309491940711,NA  
"16711","SYN2",0.634016246173917,1.09376072844515,1.82718725227527,0.5  
98603524123306,0.549437305447054,NA  
"16712","AC034198.2",0.713321980666796,-0.977762757037983,1.7939867213  
5806,-0.545022293307616,0.585738185083393,NA  
"16713","WNT7A",0.100823152638361,-1.35173207482145,3.35247519753738,-

0.40320419844251,0.686798011343181,NA  
"16714","AC090004.2",0,NA,NA,NA,NA,NA  
"16715","AC090946.1",0.355136568861056,1.5186996579252,2.4778064852054  
2,0.612921011787285,0.539928569196643,NA  
"16716","AC090948.1",1.62562725205565,0.779103504304965,1.166451975881  
69,0.667925915866412,0.504180883622183,NA  
"16717","AC090948.2",0.219614265997676,-1.35173207482145,3.35247519753  
738,-0.40320419844251,0.686798011343181,NA  
"16718","AC090948.3",0.466257134377828,0.639582163945474,2.19654113733  
711,0.291176956840812,0.770915985173488,NA  
"16719","AC090948.4",0.302935778684673,1.24376146070571,3.128474743470  
89,0.397561611549346,0.690953362451962,NA  
"16720","AC010727.1",0.166727055861678,-0.774663427007578,3.3524751975  
3738,-0.231072082972193,0.817258802814835,NA  
"16721","AC090644.1",0,NA,NA,NA,NA,NA  
"16722","AC144521.1",0.679960028086977,1.04919775647452,2.262541973112  
67,0.463725212147601,0.642844631406802,NA  
"16723","SATB1-  
AS1",0.307439366388676,-0.151735553622885,2.6698589116342,-0.056832798  
5279224,0.954678386705447,NA  
"16724","KCNH8",0,NA,NA,NA,NA,NA  
"16725","AC061958.1",1.79255845078913,0.936863499132677,1.202996262818  
44,0.778775070288038,0.436112225492319,NA  
"16726","PP2D1",0,NA,NA,NA,NA,NA  
"16727","SG01",0.842327661492742,0.137614709979131,1.88188557400828,0.  
0731259710366032,0.941705875081483,NA  
"16728","SG01-  
AS1",0.631311047491027,1.30679741210726,1.98625004451395,0.65792190450  
3744,0.510588314576331,NA  
"16729","AC116096.1",0.597186937910274,-0.648842144561396,2.0225003294  
4818,-0.320811885720893,0.748352951619279,NA  
"16730","UBE2E2-  
AS1",1.76038764617252,-0.201030111635921,1.12256349629351,-0.179081283  
419321,0.857873878100196,NA  
"16731","UBE2E1-  
AS1",0.269868662679755,1.13857476503723,3.23247437146312,0.35223009812  
1977,0.724665706448339,NA  
"16732","LINC00691",0.53787420597739,1.05451300243243,2.32503182069219  
,0.453547772141239,0.650154351850419,NA  
"16733","AC012087.2",0.287785067625315,-0.774666036310719,3.1203959310  
9626,-0.248258891953677,0.803934102976972,NA  
"16734","LINC02084",2.2673597709094,-0.124941009560492,1.0161294306576  
6,-0.122957770723782,0.902140538224137,NA  
"16735","EOMES",1.85261773744203,0.992847682024554,1.34735379569576,0.  
736887137733453,0.461190986515553,NA  
"16736","RBMS3-  
AS2",1.7119239378984,1.07984245125651,1.36286721996526,0.7923313698043  
37,0.428167485028674,NA  
"16737","AC025614.2",0.221906102043421,0.695830468846429,3.33747149841  
039,0.208490310457437,0.834846147549618,NA

"16738", "GADL1", 0, NA, NA, NA, NA, NA  
"16739", "AC097639.1", 0.437523230686937, -1.9739171793373, 2.38344183337,  
-0.828179295882514, 0.407568967304804, NA  
"16740", "TRIM71", 0, NA, NA, NA, NA, NA  
"16741", "CCR4", 0.35733949327987, -1.78896441300918, 2.51214002277892, -0.  
71212766676526, 0.476385723325114, NA  
"16742", "TMPPE", 2.29112937141038, -0.141455078070757, 0.913411765199923,  
-0.154864523821626, 0.876928122062132, NA  
"16743", "ARPP21", 0, NA, NA, NA, NA, NA  
"16744", "DCLK3", 0.888119364430463, -0.170958447423897, 1.49131540396883,  
-0.114636009907044, 0.908733636071285, NA  
"16745", "LINC02033", 1.21059281087754, -0.179235357136386, 1.443863195808  
76, -0.12413596915322, 0.901207619138707, NA  
"16746", "AC011816.2", 0.100823152638361, -1.35173207482145, 3.35247519753  
738, -0.40320419844251, 0.686798011343181, NA  
"16747", "AC126118.1", 0.405743437044373, 0.23137792513445, 2.195054700140  
61, 0.105408728593246, 0.916051490235742, NA  
"16748", "AC097359.3", 0.204461874445769, -1.96013641505178, 3.33548947920  
397, -0.587660799793491, 0.556759992345141, NA  
"16749", "DLEC1", 1.25998073242419, 0.334150628038293, 1.46259916696103, 0.  
228463570598489, 0.819285873702908, NA  
"16750", "SLC22A13", 0.390471339645796, -0.0601964608967816, 2.51831605211  
681, -0.0239034575688713, 0.980929616330929, NA  
"16751", "SLC22A14", 0.102686272020481, -0.0533240139618846, 3.35247519753  
738, -0.0159058638229612, 0.987309491940711, NA  
"16752", "ACVR2B-  
AS1", 1.15628826622777, 0.900957034677738, 1.40018089680855, 0.64345759660  
8626, 0.519927220770898, NA  
"16753", "SCN11A", 1.64438373165318, 1.37918360074591, 1.22757698857829, 1.  
12350069574309, 0.261224905265935, NA  
"16754", "AC092053.2", 2.04477159625253, -0.281702216838789, 1.03396153159  
931, -0.272449417342499, 0.785276479679411, NA  
"16755", "AC092053.5", 0.0534622507802646, -0.0533240139618838, 3.35247519  
753738, -0.015905863822961, 0.987309491940711, NA  
"16756", "CX3CR1", 1.56742592551012, -0.615465847571959, 1.37666237017693,  
-0.447071018214045, 0.654823783799331, NA  
"16757", "AC104850.2", 0.154285403418625, -0.774663427007578, 3.3524751975  
3738, -0.231072082972193, 0.817258802814835, NA  
"16758", "CCR8", 0, NA, NA, NA, NA, NA  
"16759", "AC099332.2", 0.722400098525131, 0.0413867301821953, 2.1983268129  
9376, 0.0188264683565559, 0.984979538867572, NA  
"16760", "AC099332.1", 2.02904068383226, 0.024406311928493, 1.441012038884  
54, 0.0169369243766939, 0.986486935593713, NA  
"16761", "MYRIP", 0.221906102043421, 0.695830468846429, 3.33747149841039, 0.  
.208490310457437, 0.834846147549618, NA  
"16762", "AC099560.1", 0.728408717740647, -2.67698922543429, 1.81327304136  
588, -1.47632990970726, 0.13985534853563, NA  
"16763", "AC099541.2", 0.525783344543027, -1.13171016034231, 2.07672049086  
244, -0.544950639877554, 0.585787466375985, NA  
"16764", "VIPR1", 1.66312847763976, -2.46893106518088, 1.36523848046192, -1

.80842475546509,0.0705404179271739,NA  
"16765","VIPR1-AS1",0,NA,NA,NA,NA,NA  
"16766","AC099329.1",0.608222486261352,-2.20716957687763,1.98732700085  
538,-1.11062224582448,0.26673098319822,NA  
"16767","AC099329.2",1.83612101916615,0.893919260105474,1.153335876121  
71,0.775072794155537,0.438296646534529,NA  
"16768","CYP8B1",0.102686272020481,-0.0533240139618846,3.3524751975373  
8,-0.0159058638229612,0.987309491940711,NA  
"16769","AC092042.4",0,NA,NA,NA,NA,NA  
"16770","SNRK-  
AS1",2.15985042251704,-1.0737269669207,0.973521550833216,-1.1029308657  
8486,0.27005718900161,NA  
"16771","AC104187.1",0.845546795115259,0.0528616935449723,1.5806898814  
0737,0.0334421660863083,0.97332198477891,NA  
"16772","ZKSCAN7-  
AS1",0.38679665665695,-0.154274896056064,2.50238787680135,-0.061651072  
3562424,0.950840704404243,NA  
"16773","TGM4",0.712632700430206,1.15352965586731,1.80289465049755,0.6  
39820887786741,0.522289051302654,NA  
"16774","CDCP1",0.793454939382284,-2.33336705320297,1.63939311385521,-  
1.42331148855189,0.154645878034676,NA  
"16775","SLC6A20",0,NA,NA,NA,NA,NA  
"16776","CCR9",0,NA,NA,NA,NA,NA  
"16777","CXCR6",2.04496488040797,0.698795389244081,1.02434108189758,0.  
682190143101136,0.495118726611311,NA  
"16778","XCR1",0.102230937222884,-1.35173207482145,3.35247519753738,-0  
.403204198442509,0.686798011343181,NA  
"16779","CCR3",0.476168718866222,-0.806164721328749,2.40094154813908,-  
0.335770240618141,0.737044133139428,NA  
"16780","CCR2",0.426549712157548,0.430454523828902,2.85338122803838,0.  
150857698087832,0.880087970534561,NA  
"16781","CCR5AS",0.102230937222884,-1.35173207482145,3.35247519753738,  
-0.403204198442509,0.686798011343181,NA  
"16782","CCR5",0.828840509566919,-0.846234541766594,1.55918232126848,-  
0.542742519731839,0.587307094263219,NA  
"16783","LINC02009",0,NA,NA,NA,NA,NA  
"16784","LTF",0,NA,NA,NA,NA,NA  
"16785","LRRC2-  
AS1",0.221906102043421,0.695830468846429,3.33747149841039,0.2084903104  
57437,0.834846147549618,NA  
"16786","ALS2CL",2.13523881865869,1.121843115826,1.15174466232897,0.97  
4038042040924,0.330037650898925,NA  
"16787","TMIE",0.102686272020481,-0.0533240139618846,3.35247519753738,  
-0.0159058638229612,0.987309491940711,NA  
"16788","PRSS45P",0.102686272020481,-0.0533240139618846,3.352475197537  
38,-0.0159058638229612,0.987309491940711,NA  
"16789","CSPG5",0.205372544040962,0.695830627438559,3.33747149429751,0  
.208490358233014,0.834846110249776,NA  
"16790","AC112512.1",0.204917209243366,-0.774663427007578,3.3524751975  
3738,-0.231072082972194,0.817258802814834,NA

"16791","CDC25A",0.266142423915515,-1.3728236824524,3.23491314131495,-  
0.424377293139429,0.671290677960157,NA  
"16792","CAMP",1.50409547922319,-1.16485758651137,1.54724931199874,-0.  
752857071887529,0.451535806798469,NA  
"16793","AC134772.1",0,NA,NA,NA,NA,NA  
"16794","PFKFB4",0.881067917877273,-0.328623756474533,1.53898323413293  
, -0.213533032190361,0.830911227220371,NA  
"16795","CELSR3",0.480267771172522,0.867768471987108,2.07432029418512,  
0.418338708067262,0.675699492494923,NA  
"16796","PRKAR2A-  
AS1",1.44093248372745,0.592461036906772,1.31973292874143,0.44892494837  
7074,0.653485798152211,NA  
"16797","AC137630.2",2.23806757235292,0.255139906032112,1.041576433054  
35,0.244955528884167,0.80649086525711,NA  
"16798","AC137630.1",0.817582917861997,0.980950057989795,1.87605408841  
054,0.522879411659656,0.601058172770177,NA  
"16799","AC137630.4",1.38815656019076,-0.612091072394733,1.33451722016  
031,-0.458661052212729,0.646477586965685,NA  
"16800","AC137630.3",1.75596308536352,0.00160586949113418,1.1267819642  
3649,0.00142518210452749,0.998862869587411,NA  
"16801","RHOA-  
IT1",2.15996544415687,0.843620985283916,1.13960059884029,0.74027776586  
1496,0.459131469280686,NA  
"16802","BSN",0.548873586265251,1.06236753124515,2.04462371680304,0.51  
9590730810002,0.603348859938884,NA  
"16803","AMIG03",2.07895641300437,0.128210317975538,1.13962580126074,0  
.11250211940946,0.910425289366955,NA  
"16804","MST1R",1.53375461884708,1.79661102879452,1.48591432080402,1.2  
0909463193165,0.226626491317282,NA  
"16805","SEMA3F-  
AS1",0.61053925994852,1.21924162777507,2.02475480485902,0.602167543867  
103,0.547062617677157,NA  
"16806","SEMA3F",0.437953627843111,-2.71106454329426,2.7205956755249,-  
0.99649667449067,0.319008882057056,NA  
"16807","U73169.1",2.23004260182365,1.43917341695582,1.24291794545447,  
1.15789897653267,0.24690526525282,NA  
"16808","LSMEM2",0.142120095111522,-0.0533240139618842,3.3524751975373  
8,-0.0159058638229611,0.987309491940711,NA  
"16809","RASSF1-  
AS1",1.94813239004023,1.39243284519966,1.23037044785557,1.131718376060  
28,0.25775285335514,NA  
"16810","ZMYND10",2.0496713208152,-1.68605024430229,1.07551715107856,-  
1.56766467425599,0.116959409986169,NA  
"16811","CACNA2D2",1.91249875920489,1.29838464387593,1.22867624232435,  
1.05673455638705,0.290632749235374,NA  
"16812","CYB561D2.1",1.67359610949345,0.483859865652364,1.225901218802  
63,0.394697271061499,0.693066316982448,NA  
"16813","DOCK3",0.172682080803205,0.494635591052761,3.34300496985029,0  
.147961368742719,0.882373255878367,NA  
"16814","AC099050.1",0,NA,NA,NA,NA,NA



"16815", "GRM2", 0.642333929377561, -0.365875796204319, 1.82280769816084, -0.200721006704918, 0.840916733016921, NA  
"16816", "GPR62", 0.224882870979587, 1.01003906181063, 3.32983728260984, 0.303329855511435, 0.7616384958927, NA  
"16817", "TLR9", 1.85028662977516, -0.673165464839159, 1.10247235543241, -0.610596230846197, 0.541466918586398, NA  
"16818", "AC006252.1", 1.12822275632492, -1.46198418215752, 1.6258529211691, -0.899210600861886, 0.368540494849243, NA  
"16819", "TNNC1", 1.08186660342726, -0.503670807950578, 1.37826059072995, -0.365439461403903, 0.71478338912361, NA  
"16820", "ITIH3", 0, NA, NA, NA, NA, NA  
"16821", "CACNA1D", 1.58291390972629, 0.88828742532938, 1.29605928177818, 0.685375613460102, 0.493106928575329, NA  
"16822", "IL17RB", 0.640042093331816, -1.87571748330397, 1.96447718010844, -0.954817649345476, 0.339669920436964, NA  
"16823", "AC115282.2", 0.102686272020481, -0.0533240139618846, 3.35247519753738, -0.0159058638229612, 0.987309491940711, NA  
"16824", "WNT5A-AS1", 1.40421024969069, 2.47363448602308, 1.4286559076367, 1.73144175080968, 0.0833730055300189, NA  
"16825", "ERC2", 0.0644961186387932, -0.0533240139618838, 3.35247519753738, -0.015905863822961, 0.987309491940711, NA  
"16826", "ERC2-IT1", 0, NA, NA, NA, NA, NA  
"16827", "SPATA12", 1.65469275610461, -1.45904051870386, 1.36773010578481, -1.06676054912651, 0.286079977398803, NA  
"16828", "AC097358.2", 1.07823535852268, 0.852851077884394, 1.43663406930149, 0.593645310318346, 0.55274936885928, NA  
"16829", "ASB14", 0, NA, NA, NA, NA, NA  
"16830", "AC093928.1", 0, NA, NA, NA, NA, NA  
"16831", "DNAH12", 0.788344378128494, 1.67307960097881, 1.98227479468026, 0.844020014515033, 0.398658221539568, NA  
"16832", "AC092418.2", 0.600602737818703, 1.14987273395313, 2.34336734954633, 0.49069247899854, 0.623643966727239, NA  
"16833", "DENND6A-AS1", 1.71544529255662, 0.836581499134973, 1.27930749321373, 0.653933087684343, 0.51315491563936, NA  
"16834", "DENND6A-DT", 0.55960854304673, 2.03223757360319, 2.0441884073349, 0.994153751342672, 0.320148020088672, NA  
"16835", "FLNB-AS1", 0.11921983002294, -0.0533240139618846, 3.35247519753738, -0.0159058638229612, 0.987309491940711, NA  
"16836", "HTD2", 0.777362764507993, -1.43342147416654, 1.59631870161448, -0.897954445260093, 0.369209836477882, NA  
"16837", "FAM3D-AS1", 0.417609834274426, 0.175713628377686, 2.43690601757665, 0.0721052133772571, 0.942518177352526, NA  
"16838", "AC126121.3", 1.06239938473391, 3.00051626774583, 1.58263906064617, 1.89589423283965, 0.0579740317032244, NA  
"16839", "AC093418.1", 0.571542980760546, 2.17660399178477, 1.950605229083

96,1.11586084120514,0.264481705910504,NA  
"16840","CADPS",0.32333091346002,1.36964301339487,2.59252250820019,0.5  
2830515803148,0.597287552165004,NA  
"16841","C3orf49",0,NA,NA,NA,NA,NA  
"16842","AC012557.1",0.504299691278411,-0.606454709232444,2.1085690014  
7365,-0.28761435305584,0.773641956781731,NA  
"16843","LINC00994",0.205372544040962,0.695830627438559,3.337471494297  
51,0.208490358233014,0.834846110249776,NA  
"16844","PRICKLE2-  
AS3",0.347492639152484,1.36515954890128,3.01727533496929,0.45244778727  
3339,0.650946427429436,NA  
"16845","ADAMTS9-  
AS1",0.813716416641532,-2.08102446531662,1.71368185709495,-1.214358695  
98596,0.22461078070124,NA  
"16846","MAGI1-  
IT1",0.570512605318683,0.730495113413453,2.04639247874101,0.3569672587  
25887,0.721116316844815,NA  
"16847","MAGI1-AS1",0,NA,NA,NA,NA,NA  
"16848","KBTBD8",1.62104870439414,-0.913317347695104,1.19436278380349,  
-0.764690059067824,0.444456127107304,NA  
"16849","TAFA1",0.943686775122955,2.88391190929673,2.02883195151361,1.  
42146416175336,0.155181865153959,NA  
"16850","AC104167.1",0.0534622507802646,-0.0533240139618838,3.35247519  
753738,-0.015905863822961,0.987309491940711,NA  
"16851","AC109587.1",1.31183513025028,0.603825483938153,1.388115289583  
57,0.434996637865214,0.663564867864989,NA  
"16852","LMD3",1.80406503780233,-0.711828142501295,1.01506932450126,-  
0.701260618678475,0.483140385625617,NA  
"16853","SAMSON",0.454417140713014,1.80077312122846,2.35936521947133,  
0.763244751752325,0.445317444238798,NA  
"16854","AC097634.3",0.195582345891787,0.494635591052761,3.34300496985  
029,0.147961368742719,0.882373255878367,NA  
"16855","GPR27",1.81056654109033,-0.949997593998837,1.03462848555023,-  
0.918201661047068,0.35851329922273,NA  
"16856","PROK2",0.862466580041292,1.83309258328953,1.91536629418417,0.  
957045442877189,0.338544318759515,NA  
"16857","LINC00877",1.66673041495673,-0.738280742940896,1.084554490389  
07,-0.680722591149892,0.496047038869594,NA  
"16858","PDZRN3-  
AS1",0.674211461886498,2.43029060189747,1.8817843521219,1.291481991099  
07,0.196536595858621,NA  
"16859","AC117461.1",0.0644961186387932,-0.0533240139618838,3.35247519  
753738,-0.015905863822961,0.987309491940711,NA  
"16860","CADM2",1.23541555186577,-0.754103368953949,1.40495638541591,-  
0.536745038338476,0.591443741133952,NA  
"16861","HTR1F",0.102230937222884,-1.35173207482145,3.35247519753738,-  
0.403204198442509,0.686798011343181,NA  
"16862","STX19",1.87665327960333,2.10445317988965,1.34270804175975,1.5  
6732000884687,0.117039910748309,NA  
"16863","AC109782.1",0.936030369291403,-1.15141920864937,1.42819577017

178,-0.806205446548046,0.42012439876738,NA  
"16864","EPHA6",2.14228403149635,-1.1911600259708,1.2263776162334,-0.9  
71283241151484,0.331407251870792,NA  
"16865","AC110491.3",0.489002656238412,-2.81067479806049,2.29588596919  
099,-1.22422229839703,0.220868379567118,NA  
"16866","AC026100.1",0.102686272020481,-0.0533240139618846,3.352475197  
53738,-0.0159058638229612,0.987309491940711,NA  
"16867","ST3GAL6-  
AS1",1.71210991962489,-1.69601601349186,1.25090845735627,-1.3558274416  
6293,0.175154077915068,NA  
"16868","AC107029.1",0,NA,NA,NA,NA,NA  
"16869","AC107029.2",2.26087471604311,0.394702290763765,1.024075813109  
86,0.385422920560102,0.699924103666058,NA  
"16870","AC069222.1",0.291901910826145,1.18808087585529,3.156507894126  
03,0.376390909101225,0.70662630344776,NA  
"16871","AC129803.1",0.958543889876811,0.457227468446005,1.42865278179  
746,0.320041002454595,0.748937248393403,NA  
"16872","AC020651.1",0.11921983002294,-0.0533240139618846,3.3524751975  
3738,-0.0159058638229612,0.987309491940711,NA  
"16873","AC020651.2",0,NA,NA,NA,NA,NA  
"16874","AC106712.1",0.102230937222884,-1.35173207482145,3.35247519753  
738,-0.403204198442509,0.686798011343181,NA  
"16875","AC117435.1",0,NA,NA,NA,NA,NA  
"16876","AC063944.3",1.5996038914493,1.99337677793225,1.51898358403858  
1,1.3123096252511,0.1894156858336,NA  
"16877","LINC01990",0.606404625853161,-0.0789294460542794,2.0394056193  
7973,-0.0387021813141248,0.969127834276774,NA  
"16878","LINC00636",0.558581242450574,-2.12994903672294,2.247000534681  
14,-0.947907667954872,0.343176460972569,NA  
"16879","LINC01215",0.426823311286787,0.583971091632232,2.495316389737  
63,0.234026872918361,0.814964116304166,NA  
"16880","HHLA2",0,NA,NA,NA,NA,NA  
"16881","MYH15",0.627585565102287,-2.40051311096109,1.91810225920513,-  
1.25150424042349,0.210750567550962,NA  
"16882","MORC1",0,NA,NA,NA,NA,NA  
"16883","DPPA4",0.102230937222884,-1.35173207482145,3.35247519753738,-  
0.403204198442509,0.686798011343181,NA  
"16884","LINC01205",0,NA,NA,NA,NA,NA  
"16885","NECTIN3-  
AS1",2.11577303625905,-0.570186681112642,1.12517170374376,-0.506755261  
632931,0.612326550709044,NA  
"16886","ZBED2",0,NA,NA,NA,NA,NA  
"16887","PLCXD2",1.23139080856193,1.60578842604016,1.82857490483902,0.  
878163876027558,0.37985479268689,NA  
"16888","GCSAM",0.827322324615171,1.74151016163791,2.1735995724348,0.8  
01210206205149,0.42300996362443,NA  
"16889","TBILA",0.309302485770796,1.17088912763199,2.66183894910263,0.  
439879778611974,0.660024182340411,NA  
"16890","SLC9C1",0.100823152638361,-1.35173207482145,3.35247519753738,  
-0.40320419844251,0.686798011343181,NA

"16891","AC112487.1",0.477014658100407,-0.237929741887186,2.1509390715  
2142,-0.110616681354387,0.91192031886089,NA  
"16892","BTLA",0.106924501560529,0.385965786494404,3.34626872025989,0.  
115342137395477,0.908173940404949,NA  
"16893","CD200R1",2.06665170749185,-0.91125705279037,0.995135781132738  
, -0.915711272840686,0.359818350887149,NA  
"16894","AC074044.1",0.128992237277586,0.513744972953418,3.34245151459  
318,0.153703044220807,0.877843884367224,NA  
"16895","SIDT1",0.989612540487069,-1.45055893131709,1.56852308560017,-  
0.924792847892358,0.355073671623369,NA  
"16896","SIDT1-AS1",0,NA,NA,NA,NA,NA  
"16897","GRAMD1C",0.614562575213503,-2.31866537331332,1.91967692389232  
, -1.20784145730731,0.227108251517453,NA  
"16898","AC128687.2",0,NA,NA,NA,NA,NA  
"16899","ZDHC23",1.17629503649237,-0.597776899327673,1.32439232172946  
, -0.451359381597036,0.651730553181424,NA  
"16900","AC128687.3",0.11921983002294,-0.0533240139618846,3.3524751975  
3738,-0.0159058638229612,0.987309491940711,NA  
"16901","AC093010.2",0.390016004848199,-1.51607450676223,2.47182512334  
38,-0.613342138343241,0.539650136358375,NA  
"16902","ZNF80",0.221450767245824,-0.774663427007578,3.35247519753738,  
-0.231072082972194,0.817258802814834,NA  
"16903","ZBTB20-  
AS1",2.01614132023739,1.21121402817441,1.19884126119351,1.010320604888  
58,0.312341712405551,NA  
"16904","ZBTB20-  
AS5",1.07725172912394,2.14344184364811,1.6987023814508,1.2618112902258  
2,0.207016698595887,NA  
"16905","AC026341.1",0.652949851975727,1.39821402010853,1.762800519381  
22,0.793177676507229,0.427674311747129,NA  
"16906","LSAMP-  
AS1",0.117958369419058,0.451348601316665,3.34428110054629,0.1349613228  
51401,0.892642454377335,NA  
"16907","AC092691.1",0,NA,NA,NA,NA,NA  
"16908","UPK1B",0,NA,NA,NA,NA,NA  
"16909","ARHGAP31-  
AS1",0.100823152638361,-1.35173207482145,3.35247519753738,-0.403204198  
44251,0.686798011343181,NA  
"16910","AC073352.1",0.326538767558205,-0.331793312433368,3.0440988851  
9301,-0.108995576341906,0.913205998999919,NA  
"16911","CD80",0.311841710803895,0.171849028305229,2.65045670284036,0.  
064837515784003,0.948303371003042,NA  
"16912","PLA1A",1.66744631332729,-1.50503777450167,1.15448947646921,-1  
.30363923203922,0.19235661761537,NA  
"16913","GPR156",0.511901240834445,-1.20946659464304,2.06992019005848,  
-0.584305907276971,0.559014518516283,NA  
"16914","AC126182.3",0.220644641439539,0.945449760607245,2.90117912387  
055,0.325884655941509,0.744511625317288,NA  
"16915","HGD",0.106924501560529,0.385965786494404,3.34626872025989,0.1  
15342137395477,0.908173940404949,NA

"16916", "AC072026.2", 0.675976842402246, -1.01266400794076, 1.91955319331  
199, -0.527551938372445, 0.597810358579631, NA  
"16917", "POLQ", 1.82628129411754, 0.0458130309591635, 1.13891939514244, 0.  
0402249984981896, 0.967913747835972, NA  
"16918", "FBX040", 0, NA, NA, NA, NA, NA  
"16919", "SLC15A2", 2.18924391042464, 1.16654542196417, 1.0701268263539, 1.  
0901001575101, 0.275669026935584, NA  
"16920", "ILDR1", 0, NA, NA, NA, NA, NA  
"16921", "AC096861.2", 2.19751410418704, -0.386987820814822, 1.13669278568  
588, -0.340450670302541, 0.733517165706694, NA  
"16922", "AC112503.2", 0.660431695685091, 1.28481300629917, 1.847862650268  
49, 0.695296810134934, 0.486869312909563, NA  
"16923", "ADCY5", 1.09354856444964, -1.27632302622947, 1.4006953978424, -0.  
911206696470542, 0.362186476354597, NA  
"16924", "AC112503.1", 0.195582345891787, 0.494635591052761, 3.34300496985  
029, 0.147961368742719, 0.882373255878367, NA  
"16925", "AC020634.2", 0, NA, NA, NA, NA, NA  
"16926", "AC117488.1", 0.646273462409292, -0.28283012226401, 1.87265188177  
139, -0.151031873578379, 0.879950572807213, NA  
"16927", "AC092902.6", 0.257984474555173, 1.13858698981479, 3.325173642510  
53, 0.342414295379519, 0.732039131850101, NA  
"16928", "AC079848.2", 0.757474305736905, 1.46858285779156, 1.626302697600  
72, 0.903019382528334, 0.366515608075064, NA  
"16929", "AC016924.1", 0, NA, NA, NA, NA, NA  
"16930", "AC063919.1", 0.269413327882159, -0.15046778595343, 2.76844275514  
859, -0.0543510555432646, 0.956655473192921, NA  
"16931", "CHST13", 0.218781522057418, -0.267643672651118, 2.94083342748661  
, -0.0910094635587233, 0.927485071432953, NA  
"16932", "KBTBD12", 0.684483937123487, 1.20914535054428, 1.97329111468192,  
0.612755685944079, 0.540037895996394, NA  
"16933", "AL449214.1", 0, NA, NA, NA, NA, NA  
"16934", "GATA2-  
AS1", 0.203054089861245, -1.95461545718866, 3.33573296423696, -0.585962808  
817275, 0.557900507779092, NA  
"16935", "AC112484.3", 0.67743689231048, 1.49691896470748, 1.7863437222505  
, 0.83797924557409, 0.402042359892578, NA  
"16936", "KIAA1257", 0.739203631000461, -0.514520241239919, 1.763386570259  
92, -0.291779607442559, 0.770455138019632, NA  
"16937", "AC108673.2", 1.57988391966346, -0.731757707303382, 1.28050275990  
086, -0.571461249611079, 0.567687020534749, NA  
"16938", "AC137695.3", 0.218781522057418, -0.267643672651118, 2.9408334274  
8661, -0.0910094635587233, 0.927485071432953, NA  
"16939", "EFCAB12", 0.23843966004588, 0.69583062743856, 3.33747149429751, 0  
.208490358233014, 0.834846110249776, NA  
"16940", "TRH", 0.696333087866741, -1.89994341549029, 1.74462234104745, -1.  
08902847956743, 0.27614132691063, NA  
"16941", "ALG1L2", 0.220189306641942, -0.267602342861375, 2.93506496557825  
, -0.0911742486111047, 0.927354136344172, NA  
"16942", "LINC02021", 1.27169400075107, 1.49167831064047, 1.35809945097288  
, 1.0983572002565, 0.272048543692457, NA

"16943", "AC130888.1", 0.393326722242743, 1.64399951364785, 2.14522962336261, 0.766351301391646, 0.443467300857864, NA  
"16944", "ACPP", 0.666066938406401, -1.3513601948589, 1.99143648702266, -0.678585635878996, 0.497400446703739, NA  
"16945", "NPHP3-AS1", 1.1188673909219, -1.83158077948958, 1.91921585079922, -0.954338084862552, 0.339912535857742, NA  
"16946", "TMEM108-AS1", 0.470950698715472, 1.83090561525371, 2.08725180715359, 0.87718482694742, 0.38038625605769, NA  
"16947", "BFSP2", 0.46656487269432, 0.4137511904932, 2.38983140693968, 0.173129865684975, 0.862549349989236, NA  
"16948", "AC022296.4", 0.167182390659274, 0.576034712544328, 3.34068880739852, 0.172429922616139, 0.863099549623161, NA  
"16949", "AC080128.2", 0.183715948661733, 0.576034712544328, 3.34068880739852, 0.172429922616139, 0.863099549623161, NA  
"16950", "SLC02A1", 1.37209912418177, -3.64660733080667, 1.5548051538241, -2.34537898323639, 0.0190077479467295, NA  
"16951", "LINC02004", 0.67332868292574, 2.31245674499175, 1.95073837954708, 1.18542638481776, 0.235848904775325, NA  
"16952", "EPHB1", 0.156148522800746, 0.494635591052761, 3.34300496985029, 0.147961368742719, 0.882373255878367, NA  
"16953", "AC092969.1", 0, NA, NA, NA, NA, NA  
"16954", "AC072039.2", 0.102230937222884, -1.35173207482145, 3.35247519753738, -0.403204198442509, 0.686798011343181, NA  
"16955", "AC117382.2", 0.491774764723176, 1.91687493146544, 2.36195692504271, 0.811562188599514, 0.417042895095771, NA  
"16956", "CLDN18", 0.424960191904666, -0.699145451204289, 2.21059536464168, -0.316270205930525, 0.751797423586746, NA  
"16957", "AC016252.1", 1.05356844129419, 0.622952701093446, 1.53242065335027, 0.406515469320718, 0.684363893059851, NA  
"16958", "NME9", 0.244806367132003, 0.695807100884759, 3.33664907448574, 0.208534696143316, 0.834811494458112, NA  
"16959", "ESYT3", 0.835249945188994, 0.224585541312356, 1.9436992151882, 0.115545419557424, 0.908012821926244, NA  
"16960", "FOX L2", 0.167182390659274, 0.576034712544328, 3.34068880739852, 0.172429922616139, 0.863099549623161, NA  
"16961", "AC024933.1", 1.51899400410324, 1.46326247848198, 1.45872196171752, 1.00311266772121, 0.315806503313595, NA  
"16962", "RASA2-IT1", 0, NA, NA, NA, NA, NA  
"16963", "ATP1B3-AS1", 0.205372544040962, 0.695830627438559, 3.33747149429751, 0.208490358233014, 0.834846110249776, NA  
"16964", "AC109992.2", 0.422155608707613, 1.6830952937054, 2.85780011456825, 0.588947871170367, 0.555896243297414, NA  
"16965", "PLS1", 0, NA, NA, NA, NA, NA  
"16966", "AC072028.1", 0, NA, NA, NA, NA, NA  
"16967", "AC021074.3", 0.102230937222884, -1.35173207482145, 3.35247519753738, -0.403204198442509, 0.686798011343181, NA  
"16968", "PAQR9", 0.165319271277154, -0.774663427007578, 3.35247519753738,

-0.231072082972193,0.817258802814835,NA  
"16969","PAQR9-  
AS1",0.654536627221898,1.46556495582398,1.79233684206548,0.81768388699  
474,0.413537713432745,NA  
"16970","AC018450.1",0.100823152638361,-1.35173207482145,3.35247519753  
738,-0.40320419844251,0.686798011343181,NA  
"16971","AC131210.1",0.102686272020481,-0.0533240139618846,3.352475197  
53738,-0.0159058638229612,0.987309491940711,NA  
"16972","AC107021.2",1.78315715587568,0.561141526465998,1.200557703541  
77,0.467400712860841,0.64021321267543,NA  
"16973","LNCSRLR",0.389088492702695,1.57791456375365,2.49326979048727,  
0.632869563403832,0.526818825201591,NA  
"16974","PLSCR2",0.102686272020481,-0.0533240139618846,3.3524751975373  
8,-0.0159058638229612,0.987309491940711,NA  
"16975","AC093001.2",0.154285403418625,-0.774663427007578,3.3524751975  
3738,-0.231072082972193,0.817258802814835,NA  
"16976","TM4SF18",0.305740361881726,-1.38485840137887,2.64966120810703  
,-0.52265489532839,0.601214431685811,NA  
"16977","TM4SF1-AS1",0,NA,NA,NA,NA,NA  
"16978","WWTR1-  
AS1",0.953044199732881,0.459141315172129,1.42986449961748,0.3211082695  
56283,0.748128343697157,NA  
"16979","LINC01213",0.927930596664165,-1.93519545946124,2.053029290822  
97,-0.942604895172003,0.345883035041682,NA  
"16980","AC018545.1",0.102230937222884,-1.35173207482145,3.35247519753  
738,-0.403204198442509,0.686798011343181,NA  
"16981","ERIC6",0.326538767558205,-0.331793312433368,3.04409888519301  
,-0.108995576341906,0.913205998999919,NA  
"16982","AC011317.1",0.493265823419883,-0.648609686894505,2.1155484157  
9398,-0.306591748055588,0.759154135443565,NA  
"16983","SIAH2-  
AS1",0.995594183562568,-0.738726164354783,1.34916193043401,-0.54754447  
7568489,0.584004722348157,NA  
"16984","P2RY13",2.17858152805463,-1.48860674081373,1.04181600382778,-  
1.4288576249015,0.153045159003381,NA  
"16985","AC108718.1",0,NA,NA,NA,NA,NA  
"16986","AC026347.1",0.408426633902207,-0.672062860683508,2.5023605094  
3416,-0.268571557994846,0.78825940178234,NA  
"16987","AC078788.1",0,NA,NA,NA,NA,NA  
"16988","LINC02006",0.311841710803895,0.171849028305229,2.650456702840  
36,0.064837515784003,0.948303371003042,NA  
"16989","ARHGEF26-  
AS1",1.34449385092408,0.960481365678601,1.33116121671138,0.72153647027  
9279,0.470579510378292,NA  
"16990","MME-  
AS1",0.102686272020481,-0.0533240139618846,3.35247519753738,-0.0159058  
638229612,0.987309491940711,NA  
"16991","STRIT1",1.02191700245567,1.07164694365146,1.57463020994365,0.  
680570547220617,0.496143268590419,NA  
"16992","PLCH1",0.284240190223044,0.69583062743856,3.33747149429751,0.

208490358233014,0.834846110249776,NA  
"16993","AC104472.4",0.873149258357575,2.70318412280866,1.659517728185  
05,1.62889740609462,0.103334739313885,NA  
"16994","AC104472.5",0.100823152638361,-1.35173207482145,3.35247519753  
738,-0.40320419844251,0.686798011343181,NA  
"16995","LINC00880",0,NA,NA,NA,NA,NA  
"16996","LINC02029",0.328951989943169,0.000664934463564623,3.061066763  
4348,0.000217223116956294,0.999826681030094,NA  
"16997","LINC00881",0.368828695935996,-0.759515927569295,2.55341694271  
137,-0.297450805963086,0.766122360316387,NA  
"16998","AC084212.1",0,NA,NA,NA,NA,NA  
"16999","AC080013.4",1.697704082793,-0.982315838825206,1.1194395936384  
4,-0.877506785008785,0.380211435142605,NA  
"17000","AC080013.6",1.23994521589697,-0.685014773518954,1.20296417379  
87,-0.569439047678224,0.569058224046398,NA  
"17001","AC080013.3",1.19865999317129,3.21059245737382,1.6906985783037  
4,1.89897389077773,0.0575679089441303,NA  
"17002","IQCJ-  
SCHIP1",2.10731568388228,-2.12793834523081,1.07057270402962,-1.9876635  
5355529,0.0468489123478284,NA  
"17003","IQCJ",0.23843966004588,0.69583062743856,3.33747149429751,0.20  
8490358233014,0.834846110249776,NA  
"17004","SCHIP1",1.02760727168909,-3.98948338578532,1.86888342848142,-  
2.13468819134804,0.0327864882075861,NA  
"17005","IL12A",1.06230589308472,-2.42841952027726,1.62157948048889,-1  
.4975642880885,0.13424649100024,NA  
"17006","SPTSSB",0.209155438783414,-0.335374473295219,3.34626863491525  
, -0.10022341595528,0.920166956363588,NA  
"17007","WDR49",0.221906102043421,0.695830468846429,3.33747149841039,0  
.208490310457437,0.834846147549618,NA  
"17008","MECOM",0.718201297020911,-2.61161883192993,1.84338320544619,-  
1.41675307891165,0.156555132371675,NA  
"17009","AC078802.1",1.8522846843885,-1.90523132797366,1.3047854981632  
3,-1.46018738762478,0.144238580658525,NA  
"17010","AC078795.1",0.42806698099614,0.480112305801356,2.216646682388  
09,0.216593970349893,0.828524785164299,NA  
"17011","AC078795.3",1.02573587183798,0.932681318090885,1.479087789107  
53,0.630578742492124,0.52831600176499,NA  
"17012","AC078795.2",1.27179338526523,0.513817346992331,1.288689226095  
11,0.398713154876961,0.690104573765316,NA  
"17013","AC008040.1",0.154285403418625,-0.774663427007578,3.3524751975  
3738,-0.231072082972193,0.817258802814835,NA  
"17014","GPR160",1.18904569975237,-0.0785175314220363,1.50631485969825  
, -0.0521255771437885,0.958428633051728,NA  
"17015","SLC7A14",0.44805043362689,1.78938383320115,2.36627214621428,0  
.756203734242457,0.44952705422536,NA  
"17016","AC026316.5",1.42996662006602,1.8841555419651,1.49372978919067  
, 1.26137642537475,0.207173257827732,NA  
"17017","GHSR",0,NA,NA,NA,NA,NA  
"17018","LINC02068",0.703410396178403,0.18743147195273,1.8283194116007



8,0.10251571512257,0.918347339702136,NA  
"17019","TBL1XR1-  
AS1",0.102686272020481,-0.0533240139618846,3.35247519753738,-0.0159058  
638229612,0.987309491940711,NA  
"17020","LINC00578",1.88069820096647,1.49317892390736,1.20577606588212  
,1.23835508612039,0.215584426583807,NA  
"17021","LINC02015",0.220644641439539,0.945449760607245,2.901179123870  
55,0.325884655941509,0.744511625317288,NA  
"17022","LINC01014",0.205372544040962,0.695830627438559,3.337471494297  
51,0.208490358233014,0.834846110249776,NA  
"17023","KCNMB2-  
AS1",2.17537023164617,2.55940364088237,1.35795355135494,1.884750504410  
59,0.0594635302247229,NA  
"17024","AC007823.1",0.346581969557291,-1.38612727586565,2.96955222737  
921,-0.466779894654011,0.640657361748092,NA  
"17025","AC007620.3",1.12670534845698,0.461919831797189,1.358747492253  
45,0.339960025266436,0.733886632077957,NA  
"17026","AC090425.3",0.102686272020481,-0.0533240139618846,3.352475197  
53738,-0.0159058638229612,0.987309491940711,NA  
"17027","PEX5L",0.268005543297635,-0.150415693622294,2.77274999608506,  
-0.0542478383679276,0.956737707263394,NA  
"17028","AC007687.1",0.324713760403121,-0.225893185321799,2.6088928630  
8965,-0.0865858420319639,0.931000720053001,NA  
"17029","LINC01206",0.102686272020481,-0.0533240139618846,3.3524751975  
3738,-0.0159058638229612,0.987309491940711,NA  
"17030","AC092953.2",1.04930784083736,-1.05601324972381,1.528143376485  
39,-0.691043305211686,0.489538327193454,NA  
"17031","MCCC1-AS1",0,NA,NA,NA,NA,NA  
"17032","LAMP3",1.06584580058,-0.32747126140705,1.46672641789431,-0.22  
3266764279858,0.823327892663895,NA  
"17033","MCF2L2",0.813242558801076,1.7479482948811,1.73395102242146,1.  
00807247279689,0.313419671487286,NA  
"17034","KLHL6",1.64313105073956,0.380149447573863,1.31973178449256,0.  
288050535753393,0.773308055271908,NA  
"17035","KLHL6-AS1",0,NA,NA,NA,NA,NA  
"17036","YEATS2-  
AS1",0.795223290559158,-0.461019822697203,1.7697003642278,-0.260507276  
834046,0.794472502939622,NA  
"17037","MAP6D1",1.96983888750158,0.143931238262269,1.02261076407117,0  
.140748800344381,0.888068391694096,NA  
"17038","AC131235.3",0.26007846453058,0.946467962785628,2.757134053164  
27,0.343279631869694,0.731388102297512,NA  
"17039","AC131235.2",0.597334942383465,-1.74965698840579,2.02423299775  
484,-0.86435553137727,0.387392613263178,NA  
"17040","CAMK2N2",0.298268617912268,1.11711823327978,2.67902047659825,  
0.416987568045118,0.676687501005877,NA  
"17041","LINC02054",1.38063720509147,-1.08051799678024,1.3107156541722  
8,-0.824372542847662,0.409727911086817,NA  
"17042","AC107294.3",0.5617705735059,2.10722736702905,1.98616632221098  
,1.06095211839223,0.288711661858617,NA

"17043", "AC107294.1", 0.359202612661991, -0.842638784440209, 2.2647614482912, -0.372065139609293, 0.709844350633511, NA  
"17044", "LIPH", 0.373482446845741, -1.51663267923001, 2.50304677550435, -0.605914637342093, 0.544571439100793, NA  
"17045", "DGKG", 0.501322707773513, -0.261522632567014, 1.94506697276945, -0.134454307346883, 0.89304334038757, NA  
"17046", "AC068631.1", 1.3772328992761, -1.34030617481455, 1.32919610269223, -1.00835848984196, 0.31328239310849, NA  
"17047", "AC112907.3", 1.11214839305347, 0.338234742128426, 1.6079357049801, 0.21035339975401, 0.833391860508476, NA  
"17048", "LINC02043", 1.00675785700767, 0.248610635691029, 1.45832701373041, 0.170476603224321, 0.864635332947619, NA  
"17049", "AC072022.1", 1.119297279957, -1.93275942555712, 1.46885674145146, -1.31582568334557, 0.188232556833117, NA  
"17050", "LPP-AS1", 0, NA, NA, NA, NA, NA  
"17051", "TP63", 2.27808255080299, -1.15499564149902, 1.06969920574034, -1.07973871093944, 0.28025855044187, NA  
"17052", "P3H2", 1.15119260336047, 0.07718278052551, 1.48523258155593, 0.0519667973110672, 0.958555149558285, NA  
"17053", "CLDN1", 0.154285403418625, -0.774663427007578, 3.35247519753738, -0.231072082972193, 0.817258802814835, NA  
"17054", "OSTN", 0.100823152638361, -1.35173207482145, 3.35247519753738, -0.40320419844251, 0.686798011343181, NA  
"17055", "OSTN-AS1", 1.02415363736134, -0.810393504302043, 1.50645503361842, -0.537947357350271, 0.590613392530264, NA  
"17056", "UTS2B", 2.20127687702444, -0.261147884486468, 1.19208482625269, -0.219068206167329, 0.826596917026507, NA  
"17057", "AC073365.1", 0.156148522800746, 0.494635591052761, 3.34300496985029, 0.147961368742719, 0.882373255878367, NA  
"17058", "PLAAT1", 0.813836122488202, -1.83233404849843, 1.65017493670288, -1.11038775813642, 0.266831971132966, NA  
"17059", "ATP13A4", 1.82676007948737, 0.699495741697495, 1.04821488195241, 0.66732094128888, 0.504567152829343, NA  
"17060", "OPA1-AS1", 0.261339925134462, 0.693947743382389, 3.27302645474789, 0.212020206062111, 0.832091270506721, NA  
"17061", "LINC02028", 0.633414587395679, -0.13414705520912, 1.89270126654514, -0.0708759789937621, 0.94349646127205, NA  
"17062", "LRRC15", 1.27950797364789, -2.27251169098397, 1.74149772295156, -1.30491798010073, 0.191920778072209, NA  
"17063", "GP5", 0.204917209243366, -0.774663427007578, 3.35247519753738, -0.231072082972194, 0.817258802814834, NA  
"17064", "AC108676.1", 1.2621821777777, 0.576314860020799, 1.43489075956133, 0.401643718297404, 0.687946250499383, NA  
"17065", "AC046143.2", 0.102230937222884, -1.35173207482145, 3.35247519753738, -0.403204198442509, 0.686798011343181, NA  
"17066", "XXYLT1-AS2", 0.49495600068739, -0.211707355424753, 2.14088090216778, -0.098887964860813, 0.921227224716588, NA

"17067", "AC090018.2", 1.28294863946298, -0.110974121265014, 1.19360284328183, -0.0929740758323665, 0.925924156484599, NA  
"17068", "ACAP2-IT1", 0.585914508303835, 2.13324180589672, 1.97327877332797, 1.08106458891207, 0.279668383802362, NA  
"17069", "AC069213.1", 0.102686272020481, -0.0533240139618846, 3.35247519753738, -0.0159058638229612, 0.987309491940711, NA  
"17070", "AC233280.1", 1.83193284066418, -1.04013418848898, 1.01548831604433, -1.02426997145634, 0.30570777716699, NA  
"17071", "MUC4", 0.525354627879402, -2.0355711118599, 2.03672948091676, -0.999431260229833, 0.317585822880453, NA  
"17072", "AC124944.3", 0.244806367132003, 0.695807100884759, 3.33664907448574, 0.208534696143316, 0.834811494458112, NA  
"17073", "TNK2-AS1", 0.203054089861245, -1.95461545718866, 3.33573296423696, -0.585962808817275, 0.557900507779092, NA  
"17074", "ZDHC19", 0, NA, NA, NA, NA, NA  
"17075", "SLC51A", 1.08196648864955, -3.20084990213204, 1.9795007134721, -1.61699860997658, 0.105878580957155, NA  
"17076", "TM4SF19-AS1", 2.34235386289975, 1.55848616400623, 1.26068698846051, 1.23621975817278, 0.216376888290549, NA  
"17077", "TM4SF19", 1.97056952452098, -2.76013869778192, 1.21256508289024, -2.27628086667557, 0.0228292045360983, NA  
"17078", "AC117490.2", 1.15196695599889, 1.4058826587613, 1.55889314546086, 0.901846712749307, 0.367138301451328, NA  
"17079", "LINC01063", 0.528591222557451, 0.90093798744672, 2.77196569029398, 0.325017726807135, 0.745167655381326, NA  
"17080", "NRR05", 0.91534401459363, -2.18627237336803, 1.75563229482281, -1.24529058836246, 0.213024953970524, NA  
"17081", "NCBP2-AS1", 0, NA, NA, NA, NA, NA  
"17082", "AC011322.1", 0.348606503275262, -0.207419509720268, 2.97668775490289, -0.0696813125187982, 0.944447316071686, NA  
"17083", "DLG1-AS1", 0.142120095111522, -0.0533240139618842, 3.35247519753738, -0.0159058638229611, 0.987309491940711, NA  
"17084", "LINC02012", 0, NA, NA, NA, NA, NA  
"17085", "BDH1", 1.54878713589288, -1.44409890930725, 1.63287650658992, -0.884389544144454, 0.376485965286566, NA  
"17086", "AC024560.3", 1.78196266864043, 0.946992053656605, 1.17969001617721, 0.802746518721367, 0.422121259537573, NA  
"17087", "AC024560.4", 1.32149605893689, -0.845745415095057, 1.42150580603454, -0.594964446507865, 0.551867236726061, NA  
"17088", "AC055764.2", 0.309978591421774, -0.935659917707259, 2.67911838297866, -0.349241722072388, 0.726907846061335, NA  
"17089", "AC135893.1", 0.310685332713897, -0.774666839538346, 3.04539624828073, -0.254373085267864, 0.799207342088715, NA  
"17090", "AC253576.2", 0.615232824286164, 2.25435155146633, 1.90407251747532, 1.18396307429271, 0.2364276801874, NA  
"17091", "ZNF732", 0.319604674695779, -0.87023804472743, 2.6537153836642, -

0.327931944052652,0.742963120211237,NA  
"17092","AC092574.1",0.370691815318116,0.409327796421713,2.56535485568  
3,0.159559912545796,0.873227759460615,NA  
"17093","PDE6B",0.549475245043489,2.12606410536101,1.95761548366552,1.  
0860478592967,0.27745781875291,NA  
"17094","AC107464.3",0.711214601537044,0.054315929629643,1.87304314030  
985,0.0289987606055127,0.97686557907338,NA  
"17095","CPLX1",0.598820652622924,1.09508674560078,1.96743256784464,0.  
55660700320747,0.577795967886521,NA  
"17096","AC092535.2",2.21975148006395,1.06761502095566,1.1364045028274  
2,0.939467432854576,0.347490805423891,NA  
"17097","AC092535.5",1.29935787530985,-0.0940832009271648,1.3889167333  
4886,-0.0677385466444181,0.945993763981248,NA  
"17098","FAM53A",1.46242803907721,-0.354451113043853,1.12900056750108,  
-0.313951226639675,0.753558082623748,NA  
"17099","AC016773.1",1.66249386590923,-1.44433294120088,1.207264594994  
63,-1.19636817578279,0.231552914647914,NA  
"17100","FGFR3",0.448812906780176,-1.78747782076132,2.74829100655764,-  
0.650396124899531,0.515436379770015,NA  
"17101","NAT8L",0.102230937222884,-1.35173207482145,3.35247519753738,-  
0.403204198442509,0.686798011343181,NA  
"17102","AL121750.1",0.511516176823821,0.424631114698905,2.36202921759  
038,0.179773862040577,0.857330104347155,NA  
"17103","HTT-AS",0,NA,NA,NA,NA,NA  
"17104","MSANTD1",1.57989808590162,-1.25578211818009,1.16447229036759,  
-1.07841305333567,0.2808494642699,NA  
"17105","HGFAC",0.476624053663818,0.544431635961036,2.79390331386159,0.  
.19486416486208,0.845499288664445,NA  
"17106","DOK7",0.426489362828409,-1.97372270225695,2.40071668713449,-0.  
.822138952436242,0.410997818389828,NA  
"17107","ADRA2C",1.47984437604043,-0.171807957457828,1.25262741334588,  
-0.137158069213026,0.890905853526298,NA  
"17108","NSG1",0.409379083689134,-1.78470406805556,2.82546474996282,-0.  
.631649737650787,0.527615778260201,NA  
"17109","CYTL1",0.788677378242654,0.024953524329,1.63040653255505,0.01  
53050934418759,0.987788778980989,NA  
"17110","CRMP1",1.68764836293759,-1.40994099972657,1.37067948074204,-1.  
.02864383653228,0.303647070683503,NA  
"17111","C4orf50",0.100823152638361,-1.35173207482145,3.35247519753738  
, -0.40320419844251,0.686798011343181,NA  
"17112","JAKMIP1",0.540525660271267,1.03931393771979,2.07705944699018,  
0.500377559836258,0.616809251096167,NA  
"17113","PPP2R2C",0.556743060709877,-1.36702376268488,2.03427614666863  
, -0.671995178689751,0.501586765664358,NA  
"17114","LINC002481",0.102230937222884,-1.35173207482145,3.35247519753  
738,-0.403204198442509,0.686798011343181,NA  
"17115","S100P",1.54535185497474,0.838867438742777,1.31621890766537,0.  
637331247756278,0.523909101170171,NA  
"17116","AC097382.1",0.0534622507802646,-0.0533240139618838,3.35247519  
753738,-0.015905863822961,0.987309491940711,NA

"17117", "AC097382.2", 0, NA, NA, NA, NA, NA  
"17118", "AFAP1-  
AS1", 0.348736308861838, 1.27446409017051, 3.01484271623417, 0.42272987685  
4882, 0.672492354751249, NA  
"17119", "AC097381.1", 0.263073024361275, 1.1485336607599, 3.2339706751069  
9, 0.355146591031441, 0.722479774079932, NA  
"17120", "ABLIM2", 0.248212067300526, 0.997943832444287, 3.29816976420681,  
0.302575035182971, 0.762213742182461, NA  
"17121", "LINC02517", 1.51948631504305, 1.18980865712575, 1.60480174544131  
, 0.741405385746613, 0.458447679934197, NA  
"17122", "GPR78", 1.66520206581136, 1.89040197811177, 1.44885879699408, 1.3  
0475238997323, 0.191977175685592, NA  
"17123", "HMX1", 2.03339133344275, 0.670251943468373, 1.40077932420943, 0.4  
78485034640735, 0.632305023319788, NA  
"17124", "AC073648.7", 1.51633533949571, 2.70714951726336, 2.0933171267151  
, 1.2932343039258, 0.195930034584698, NA  
"17125", "AC105916.1", 0.684154604974025, -1.02092410715171, 1.78731245783  
441, -0.571206283868634, 0.567859819125645, NA  
"17126", "SLC2A9", 2.26828846283933, -0.729912186472758, 1.03194261520901,  
-0.707318581203203, 0.479368520969501, NA  
"17127", "CLNK", 0.386770038522978, -0.777140795601295, 2.23651825660742, -  
0.347477957448084, 0.728232275507767, NA  
"17128", "AC006230.1", 0.515351135462737, -0.00368517133124277, 2.08241997  
206493, -0.00176965808082822, 0.998588017876389, NA  
"17129", "AC025539.1", 0.142120095111522, -0.0533240139618842, 3.352475197  
53738, -0.0159058638229611, 0.987309491940711, NA  
"17130", "AC005699.1", 0.275368352823686, 1.11865680170283, 2.739778946225  
96, 0.408301846119294, 0.683052084109357, NA  
"17131", "AC007370.1", 0.156148522800746, 0.494635591052761, 3.34300496985  
029, 0.147961368742719, 0.882373255878367, NA  
"17132", "LINC01096", 0, NA, NA, NA, NA, NA  
"17133", "CPEB2-  
DT", 0.76059526106654, 1.33748694316414, 1.917329122775, 0.697578171257503  
, 0.485441036806259, NA  
"17134", "AC098829.1", 1.083909252196, -2.48546637923682, 1.65968039599011  
, -1.49755723164644, 0.13424832556176, NA  
"17135", "AC116651.1", 0.718451622983692, 1.40878308379731, 1.920663474825  
97, 0.733487725602198, 0.463261011465596, NA  
"17136", "AC006427.2", 2.09439760383393, 1.49056091487683, 1.3121050924035  
2, 1.13600726306642, 0.255953524603416, NA  
"17137", "AC097515.1", 0, NA, NA, NA, NA, NA  
"17138", "AC104656.1", 0, NA, NA, NA, NA, NA  
"17139", "SLIT2-  
IT1", 0.455660810422367, 1.78812118528307, 2.35561684093932, 0.75908830086  
7319, 0.447799737069754, NA  
"17140", "AC098595.1", 0.820671574234582, -0.704205641138208, 1.6751204704  
0412, -0.420391042662335, 0.674199810585229, NA  
"17141", "LINC02506", 0.269413327882159, -0.15046778595343, 2.768442755148  
59, -0.0543510555432646, 0.956655473192921, NA  
"17142", "AC104078.1", 0, NA, NA, NA, NA, NA

"17143","DTHD1",0.570485987184711,0.149456678819892,2.057972447315,0.0726232652020612,0.94210591264798,NA  
"17144","C4orf19",0.442095408685363,0.693931517896884,1.96769736575265,0.352661710065081,0.724342068163414,NA  
"17145","AC027607.1",0.824224148194408,1.78240663437099,1.66944659934419,1.06766316159569,0.285672481290688,NA  
"17146","PTTG2",0.0644961186387932,-0.0533240139618838,3.35247519753738,-0.015905863822961,0.987309491940711,NA  
"17147","LINC02278",0.0644961186387932,-0.0533240139618838,3.35247519753738,-0.015905863822961,0.987309491940711,NA  
"17148","TLR10",0.37209959990264,0.409277752655724,2.56263907640071,0.159709479350703,0.873109933317219,NA  
"17149","TMEM156",1.21101197761191,0.972321448731895,1.44037285639403,0.675048439309042,0.499644990288815,NA  
"17150","AC079921.1",1.64499659401235,0.240831763473962,1.41188027620529,0.170575202113628,0.864557797974383,NA  
"17151","KLB",0.88135745730715,1.09120301094577,1.65433960788501,0.659600366058342,0.509510319293321,NA  
"17152","LINC02265",0.709045638899712,-2.52445417575258,1.88080523192773,-1.34221988162227,0.179524711905585,NA  
"17153","AC108050.1",0,NA,NA,NA,NA,NA  
"17154","DCAF4L1",0.718132390574136,1.15370435213356,1.80089948278427,0.640626733008929,0.521765226616607,NA  
"17155","SHISA3",1.838033996163,-0.0384141249261935,1.32100055070979,-0.0290795676849287,0.976801131531495,NA  
"17156","AC096734.1",0,NA,NA,NA,NA,NA  
"17157","KCTD8",0.973880717636396,1.90539550758173,1.52931687939427,1.24591282111292,0.21279640258375,NA  
"17158","YIPF7",0.327569143000068,1.43149619843656,2.55839159377899,0.559529745922164,0.575800236269956,NA  
"17159","AC096586.2",2.01407980497428,-0.853255990473994,1.02182304267022,-0.835033029049997,0.403699111948421,NA  
"17160","GABRA2",0.11921983002294,-0.0533240139618846,3.35247519753738,-0.0159058638229612,0.987309491940711,NA  
"17161","AC107398.3",0,NA,NA,NA,NA,NA  
"17162","CORIN",0.458162645918231,-2.13740004782817,2.33704331160318,-0.914574427104625,0.360415088930616,NA  
"17163","AC107068.2",0,NA,NA,NA,NA,NA  
"17164","NIPAL1",0,NA,NA,NA,NA,NA  
"17165","TXK",1.43382544875041,0.270990114318042,1.44460179922736,0.187588105222477,0.851199551368225,NA  
"17166","SLC10A4",0,NA,NA,NA,NA,NA  
"17167","AC027271.1",0.69851236481271,1.30703032063655,1.76401347804525,0.740941232538035,0.458729073532465,NA  
"17168","LRRC66",1.07781065936623,2.0651952146754,1.48285539627755,1.39271517631436,0.163705937484659,NA  
"17169","RASL11B",1.29566337910957,-1.30668692191714,1.49924498170737,-0.87156331210731,0.383446652618681,NA  
"17170","AC023154.1",0,NA,NA,NA,NA,NA  
"17171","AC124017.1",1.78438965873,0.120432360051693,1.19937560987558,

0.100412547212116,0.920016808877473,NA  
"17172","AC110792.3",1.34003083302347,1.56561630542393,1.4003039161924  
3,1.11805465036548,0.263543653287612,NA  
"17173","AC110792.2",0.544635356725203,1.0128481360103,2.348222551876,  
0.431325444515953,0.666231751785404,NA  
"17174","KDR",0.529036457615142,-0.0193335659048119,2.06777131401115,-  
0.0093499536306594,0.992539925049355,NA  
"17175","AC069200.1",1.56168913954209,0.291306972321949,1.183214038355  
98,0.246199726236097,0.805527627469688,NA  
"17176","AC024243.1",0.80325758942727,-1.18141224435188,1.694438140020  
24,-0.697229492448609,0.485659184815199,NA  
"17177","NMU",0,NA,NA,NA,NA,NA  
"17178","EXOC1L",0.461433549884875,-1.26886855353718,2.10604901070122,  
-0.602487666284039,0.546849570666582,NA  
"17179","AC110611.1",0.284240190223044,0.69583062743856,3.337471494297  
51,0.208490358233014,0.834846110249776,NA  
"17180","AC110611.2",0.25651634064151,-1.38285975574301,2.791872439686  
38,-0.495316238695472,0.62037691003485,NA  
"17181","KIAA1211",0.732762262472865,2.5482495146366,1.85590246336716,  
1.37305142103929,0.169736361612245,NA  
"17182","AC068620.1",1.39651382154526,-0.805143503046486,1.26704128876  
714,-0.635451670110854,0.525133877954088,NA  
"17183","AC068620.2",0.548444869601626,0.657216747873167,2.05261818545  
653,0.320184607410068,0.748828391000076,NA  
"17184","SPINK2",0.257924125226034,-1.38354199007994,3.26926698797967,  
-0.423196390862814,0.672151979809054,NA  
"17185","AC069307.1",1.24190170913118,-0.730982108998281,1.60684647054  
537,-0.454917207336045,0.649168803019035,NA  
"17186","IGFBP7-AS1",0,NA,NA,NA,NA,NA  
"17187","LINC02271",0,NA,NA,NA,NA,NA  
"17188","ADGRL3",1.07986963618748,2.19702211593374,2.14990476968409,1.  
02191601549708,0.306820651682162,NA  
"17189","AC020741.1",2.01384394376568,0.335622981379445,1.288003079965  
2,0.260576225787063,0.794419325509286,NA  
"17190","EPHA5",0.271251509622856,-0.774665352300728,3.18287089738686,  
-0.243385728568736,0.8077065984266,NA  
"17191","AC104806.2",0.495411335484986,0.848903686391828,2.12715173810  
303,0.399079986249062,0.689834268570572,NA  
"17192","STAP1",0.166727055861678,-0.774663427007578,3.35247519753738,  
-0.231072082972193,0.817258802814835,NA  
"17193","TMPRSS11F",0,NA,NA,NA,NA,NA  
"17194","SULT1B1",0.244806367132003,0.695807100884759,3.33664907448574  
,0.208534696143316,0.834811494458112,NA  
"17195","AC009570.2",0,NA,NA,NA,NA,NA  
"17196","AC053527.2",0.824934741416053,0.352051358702498,1.64487835257  
878,0.214028811401503,0.830524589479279,NA  
"17197","ALB",0.0644961186387932,-0.0533240139618838,3.35247519753738,  
-0.015905863822961,0.987309491940711,NA  
"17198","AFP",1.4410404265183,-0.372886222370186,1.29175581121816,-0.2  
88666185305212,0.772836841785615,NA

"17199", "CXCL6", 0.524977218736741, 0.0386468512149867, 2.07985491751817, 0.0185815130129859, 0.985174950769436, NA  
"17200", "PF4V1", 0, NA, NA, NA, NA, NA  
"17201", "CXCL5", 1.072417158659, -0.297107787689114, 1.82377559902169, -0.162908083564935, 0.870590806092181, NA  
"17202", "AC093677.2", 1.6573972320977, -0.941405646331953, 1.24122260152225, -0.758450293426337, 0.448181459286684, NA  
"17203", "EPGN", 0, NA, NA, NA, NA, NA  
"17204", "BTC", 0.303877242499606, -2.34617912601169, 3.02976049563007, -0.774377753421653, 0.438707435439005, NA  
"17205", "PARM1", 0.619658486335232, -1.48900043145023, 1.9861119091721, -0.74970620969234, 0.453431666764302, NA  
"17206", "LINC02562", 0, NA, NA, NA, NA, NA  
"17207", "CDKL2", 0.349035219938887, 0.278666737377577, 2.58451989564205, 0.107821471155033, 0.914137310660263, NA  
"17208", "AC110615.1", 0.0644961186387932, -0.0533240139618838, 3.35247519753738, -0.015905863822961, 0.987309491940711, NA  
"17209", "PPEF2", 0.48915739946641, 0.747406714776125, 2.43807115343416, 0.306556563668522, 0.759180919779208, NA  
"17210", "CXCL11", 1.49932491642945, -1.49223763255444, 1.64021867926452, -0.909779684513512, 0.362938710549201, NA  
"17211", "FAM47E", 1.33379007159051, 1.35680121688801, 1.47766483086831, 0.918206340534429, 0.358510849810917, NA  
"17212", "CCDC158", 0.0644961186387932, -0.0533240139618838, 3.35247519753738, -0.015905863822961, 0.987309491940711, NA  
"17213", "SHR00M3", 0.102686272020481, -0.0533240139618846, 3.35247519753738, -0.0159058638229612, 0.987309491940711, NA  
"17214", "AC107072.2", 0.205372544040962, 0.695830627438559, 3.33747149429751, 0.208490358233014, 0.834846110249776, NA  
"17215", "CXCL13", 0.0534622507802646, -0.0533240139618838, 3.35247519753738, -0.015905863822961, 0.987309491940711, NA  
"17216", "AC112253.1", 1.54952586227485, -0.202654765070797, 1.31616313618842, -0.153973895407586, 0.877630318552521, NA  
"17217", "LINC00989", 0.459570430502755, -2.14341099551054, 2.30226615480745, -0.931000523564493, 0.351853293338443, NA  
"17218", "PCAT4", 1.19146275876148, 2.1924394833784, 1.81439896531357, 1.20835578353601, 0.226910439877528, NA  
"17219", "FGF5", 0.102686272020481, -0.0533240139618846, 3.35247519753738, -0.0159058638229612, 0.987309491940711, NA  
"17220", "AC073840.1", 0.589337999366887, 2.17289977712762, 2.23545977697233, 0.972014705659591, 0.331043232718552, NA  
"17221", "WDFY3-AS1", 0.266142423915515, -1.3728236824524, 3.23491314131495, -0.424377293139429, 0.671290677960157, NA  
"17222", "AC108021.1", 0.822790501851413, 0.185518563197729, 1.55415964105561, 0.119369052121134, 0.904982978786447, NA  
"17223", "PPM1K-DT", 0.296405498530148, -0.22601836373236, 2.68538977137194, -0.0841659434849525, 0.932924495242752, NA  
"17224", "PIGY-



DT",1.38225105556623,0.041105066052779,1.42016349224308,0.028943897147  
9653,0.976909335412073,NA  
"17225","AC104785.1",0.242943247749883,-0.774663951729422,3.3071134315  
1841,-0.234241724020258,0.814797324817481,NA  
"17226","AC093866.1",0,NA,NA,NA,NA,NA  
"17227","SNCA",1.87632114967188,-4.21790892859741,1.42553021866756,-2.  
9588351571669,0.00308804238262827,NA  
"17228","MMRN1",0,NA,NA,NA,NA,NA  
"17229","CCSER1",0.541888185881861,-2.03516153339814,2.02199296665835,  
-1.0065126669365,0.3141690214634,NA  
"17230","AC109925.2",0,NA,NA,NA,NA,NA  
"17231","AC106881.1",1.79864763011804,-1.25254336254219,1.219234309625  
87,-1.02731964861335,0.304269973229215,NA  
"17232","LINC02267",0.284110384636469,-0.774665791363346,3.14291126894  
145,-0.246480325110883,0.805310433006106,NA  
"17233","AC114811.2",0.100823152638361,-1.35173207482145,3.35247519753  
738,-0.40320419844251,0.686798011343181,NA  
"17234","ADH4",0,NA,NA,NA,NA,NA  
"17235","ADH1A",0.866788083693523,-0.0263951781565555,1.63849136024189  
, -0.0161094399378821,0.987147082511577,NA  
"17236","MTTP",0.504115763191804,-2.97556230087552,3.0904091424538,-0.  
962837657965544,0.335628999206986,NA  
"17237","AC097460.1",1.43794078417373,-0.0920567069082678,1.1511244795  
7465,-0.0799711139339889,0.936260230109751,NA  
"17238","AF213884.3",1.82031288002167,0.0571262397116611,1.10005426475  
828,0.0519303833835992,0.95858416449172,NA  
"17239","AC018797.3",2.30316712297854,0.831153870453893,1.371645990857  
34,0.605953632346774,0.544545543732761,NA  
"17240","AC105460.1",0.310433926219371,0.171794429070976,2.65395493672  
705,0.0647314793079491,0.948387798511658,NA  
"17241","LINC02503",0.220189306641942,-0.267602342861375,2.93506496557  
825,-0.0911742486111047,0.927354136344172,NA  
"17242","CXXC4",0.102230937222884,-1.35173207482145,3.35247519753738,-  
0.403204198442509,0.686798011343181,NA  
"17243","CXXC4-AS1",0,NA,NA,NA,NA,NA  
"17244","AC004069.1",1.12681021640214,0.486120527921488,1.437273119897  
94,0.338224183832234,0.73519425258784,NA  
"17245","AC109361.1",0.619900526865338,1.29572384173655,2.259666113904  
85,0.573413848073975,0.566364516153644,NA  
"17246","AC092445.1",1.6143423705534,1.49226611833681,1.47878070387107  
,1.00911927943774,0.312917432868956,NA  
"17247","AC096564.1",0.817685255369171,0.138401813444906,1.74855060365  
893,0.079152306576254,0.936911479350006,NA  
"17248","AC096564.2",0.692965735202301,-0.235988864003827,1.7878992214  
5429,-0.131992262859129,0.89499041154859,NA  
"17249","LEF1",0.794376594949471,0.57989693589784,1.60698702715548,0.3  
60859749393442,0.718204294298528,NA  
"17250","LEF1-  
AS1",0.0644961186387932,-0.0533240139618838,3.35247519753738,-0.015905  
863822961,0.987309491940711,NA

"17251", "RPL34-  
AS1", 0.235916738838116, 1.05444670223757, 3.3199924034585, 0.317605155101  
9, 0.750784463269352, NA  
"17252", "AC107071.1", 0.451422580882319, 1.73761194998316, 2.422419697832  
14, 0.717304252247525, 0.473186384039025, NA  
"17253", "AC126283.1", 0.195582345891787, 0.494635591052761, 3.34300496985  
029, 0.147961368742719, 0.882373255878367, NA  
"17254", "RRH", 0.884859446435813, 0.63309888167203, 1.59327195319341, 0.39  
7357701805459, 0.691103702395558, NA  
"17255", "LRIT3", 0.681233176207277, -0.126139537477746, 1.96477325191569,  
-0.0642005571659521, 0.948810533757677, NA  
"17256", "AC109347.2", 1.04091370915238, 1.3103157169329, 1.73311256287344  
, 0.756047671110545, 0.449620614532538, NA  
"17257", "AC017007.5", 0.749691198794586, 2.47359210956968, 1.901360254967  
32, 1.30095919650545, 0.193272421796886, NA  
"17258", "AC093879.1", 0.618149636743996, 1.21309111833948, 2.018938638727  
42, 0.600855863110389, 0.547935992707058, NA  
"17259", "AC104779.1", 0.102686272020481, -0.0533240139618846, 3.352475197  
53738, -0.0159058638229612, 0.987309491940711, NA  
"17260", "UGT8", 0.316079940343943, 0.253269426759434, 3.11490212990209, 0.  
0813089516772056, 0.935196255154842, NA  
"17261", "AC092661.1", 0.46046714842852, 0.429002062861358, 2.421137638678  
25, 0.177190282786054, 0.859358928111061, NA  
"17262", "METTL14-  
DT", 0.578399656089106, -1.27325106591528, 2.26738073187416, -0.5615515065  
5393, 0.574421628172134, NA  
"17263", "MYO22", 1.10375352759301, -0.56759967067281, 1.40611392059256, -0  
.403665494210892, 0.686458716925365, NA  
"17264", "AC093752.3", 0.428522315793736, 1.66405784528808, 2.175009556805  
63, 0.765080705085282, 0.444223488631033, NA  
"17265", "AC093752.2", 0.476130606639186, -2.03687176935627, 2.08491118232  
905, -0.976958532632017, 0.328589682038253, NA  
"17266", "TNIP3", 0.274913018026089, -0.226100793799534, 2.74072232109206,  
-0.0824967900102491, 0.934251670836265, NA  
"17267", "QRFPR", 0.102686272020481, -0.0533240139618846, 3.35247519753738  
, -0.0159058638229612, 0.987309491940711, NA  
"17268", "AC079341.1", 0.11921983002294, -0.0533240139618846, 3.3524751975  
3738, -0.0159058638229612, 0.987309491940711, NA  
"17269", "TRPC3", 0.699436802112507, 1.0622627129243, 2.25146905636724, 0.4  
71808710814915, 0.637063332755938, NA  
"17270", "IL2", 0, NA, NA, NA, NA, NA  
"17271", "IL21", 0, NA, NA, NA, NA, NA  
"17272", "IL21-AS1", 0, NA, NA, NA, NA, NA  
"17273", "AC053545.1", 0.102686272020481, -0.0533240139618846, 3.352475197  
53738, -0.0159058638229612, 0.987309491940711, NA  
"17274", "AC021205.3", 1.32950341551479, 0.0151654376643602, 1.19996533774  
708, 0.012638229778231, 0.989916420017838, NA  
"17275", "LINC02516", 0.0534622507802646, -0.0533240139618838, 3.352475197  
53738, -0.015905863822961, 0.987309491940711, NA  
"17276", "AC096773.1", 0.168565237602375, -1.35173207482145, 3.35247519753

738,-0.40320419844251,0.686798011343181,NA  
"17277","AC093772.2",1.53185646208363,-0.318651970272242,1.16297829568  
381,-0.273996489405573,0.784087319511262,NA  
"17278","AC093591.2",0,NA,NA,NA,NA,NA  
"17279","AC078850.1",0.585747098611294,-1.24516364764051,2.27013837851  
907,-0.548496805050623,0.583350822450051,NA  
"17280","AC015631.1",0.154285403418625,-0.774663427007578,3.3524751975  
3738,-0.231072082972193,0.817258802814835,NA  
"17281","LINC02510",1.89874671193827,0.720466265282398,1.4833319022683  
7,0.48570806316552,0.6271741659915,NA  
"17282","LINC02172",0.411078088196084,-0.771886133852615,2.48376163818  
463,-0.310773031512309,0.755973172937394,NA  
"17283","AC116563.1",0.463132554391825,-0.391143749145982,1.9540958882  
2753,-0.200166098041776,0.841350680428588,NA  
"17284","SLC7A11",0.957245039735695,-1.25189983994536,1.63936864217209  
, -0.763647545610392,0.445077307490369,NA  
"17285","LINC00499",0.0534622507802646,-0.0533240139618838,3.352475197  
53738,-0.015905863822961,0.987309491940711,NA  
"17286","AC109927.1",0.244806367132003,0.695807100884759,3.33664907448  
574,0.208534696143316,0.834811494458112,NA  
"17287","AC108053.1",0.375307454000825,-1.51672328914404,2.50822563158  
042,-0.604699700875141,0.545378546938903,NA  
"17288","CLGN",0.235916738838116,1.05444670223757,3.3199924034585,0.31  
76051551019,0.750784463269352,NA  
"17289","LINC02432",0.431182927166053,-0.721493310034905,2.47350637076  
174,-0.291688478575746,0.770524819104012,NA  
"17290","AC139720.1",0.11921983002294,-0.0533240139618846,3.3524751975  
3738,-0.0159058638229612,0.987309491940711,NA  
"17291","AC097658.3",0.324592374063902,1.32629053141379,3.073475522149  
63,0.431527930466861,0.666084548480396,NA  
"17292","SMARCA5-  
AS1",1.31774839760008,-0.963141744391331,1.41921430864851,-0.678644330  
544067,0.497363247091497,NA  
"17293","SMAD1-  
AS1",0.11921983002294,-0.0533240139618846,3.35247519753738,-0.01590586  
38229612,0.987309491940711,NA  
"17294","REELD1",0.6100589875095,-1.29372261370107,2.02146567527162,-0  
.639992372626976,0.522177558140115,NA  
"17295","AC002460.2",0.590040508583105,1.26782830319639,2.028948265057  
1,0.624869704679585,0.53205657725631,NA  
"17296","IQCM",0,NA,NA,NA,NA,NA  
"17297","AC110813.1",0.231678509298067,0.99788326475647,3.330296382547  
71,0.299637975162162,0.764453314336329,NA  
"17298","MAB21L2",0.142120095111522,-0.0533240139618842,3.352475197537  
38,-0.0159058638229611,0.987309491940711,NA  
"17299","PRSS48",0,NA,NA,NA,NA,NA  
"17300","FAM160A1",0.231678509298067,0.99788326475647,3.33029638254771  
,0.299637975162162,0.764453314336329,NA  
"17301","AC092611.1",0.167182390659274,0.576034712544328,3.34068880739  
852,0.172429922616139,0.863099549623161,NA

"17302", "LINC02273", 0.599171443631613, -1.01817409506207, 1.98878022764564, -0.511959079695503, 0.608679648683449, NA  
"17303", "AC023424.3", 0.996057937607521, 1.99743567070124, 1.69323743333627, 1.17965480290947, 0.23813753681407, NA  
"17304", "TIGD4", 1.111888585856, 1.12316857441226, 1.4879235671676, 0.754856364396666, 0.450335170131077, NA  
"17305", "MND1", 1.41728325693186, -0.700220899931609, 1.18804859634913, -0.589387422436579, 0.555601411875732, NA  
"17306", "AC106865.2", 0, NA, NA, NA, NA, NA  
"17307", "DCHS2", 0.221906102043421, 0.695830468846429, 3.33747149841039, 0.208490310457437, 0.834846147549618, NA  
"17308", "AC079298.1", 0.166727055861678, -0.774663427007578, 3.35247519753738, -0.231072082972193, 0.817258802814835, NA  
"17309", "RBM46", 0.543975554899559, 2.1139159226359, 2.19701570600429, 0.962176063129051, 0.335961170990996, NA  
"17310", "AC104083.1", 2.0039700502593, -0.0696226112322954, 1.13667059676473, -0.0612513523534964, 0.951159033208369, NA  
"17311", "TD02", 0.952299325505407, -1.67205135503146, 1.5180299861912, -1.10146134809017, 0.270695917874142, NA  
"17312", "AC084740.1", 0.590306081315792, -0.331330872294938, 2.05820111528083, -0.160980804953907, 0.872108518880249, NA  
"17313", "RXFP1", 0.231678509298067, 0.99788326475647, 3.33029638254771, 0.299637975162162, 0.764453314336329, NA  
"17314", "C4orf45", 0, NA, NA, NA, NA, NA  
"17315", "NPY5R", 2.00826173236622, -0.160197196033666, 1.06195371391832, -0.150851392046629, 0.880092945100884, NA  
"17316", "AC093788.1", 1.27783645820161, -0.187967363325612, 1.47538733240813, -0.12740204500659, 0.898622197749821, NA  
"17317", "FAM218A", 1.29879745799837, -0.203544805171882, 1.33978451796194, -0.151923538780334, 0.879247242528137, NA  
"17318", "GK3P", 0, NA, NA, NA, NA, NA  
"17319", "AC068989.1", 0.394709569185844, 0.174908154643343, 2.47654543257427, 0.0706258614692698, 0.943695527326942, NA  
"17320", "AC080188.1", 0.451842878298587, -0.604442772514498, 2.15567344060925, -0.280396260921443, 0.77917350539591, NA  
"17321", "AC096741.1", 0.324592374063902, 1.32629053141379, 3.07347552214963, 0.431527930466861, 0.666084548480396, NA  
"17322", "AC084724.1", 0.694074608709775, 0.492638852675412, 2.24434845866859, 0.219501945329675, 0.826259064660644, NA  
"17323", "GALNTL6", 0, NA, NA, NA, NA, NA  
"17324", "AC093849.3", 0.410125638409157, 0.431277444122575, 2.22733307136502, 0.193629524774337, 0.846465978260939, NA  
"17325", "LINC02269", 0.203509424658842, -0.774663427007579, 3.35247519753738, -0.231072082972194, 0.817258802814834, NA  
"17326", "AC106895.1", 0.0534622507802646, -0.0533240139618838, 3.35247519753738, -0.015905863822961, 0.987309491940711, NA  
"17327", "GLRA3", 1.67469484957532, 0.0915721604361046, 1.18214104998951, 0.0774629731679799, 0.938255245866409, NA  
"17328", "GPM6A", 0, NA, NA, NA, NA, NA  
"17329", "SPATA4", 0, NA, NA, NA, NA, NA

"17330", "AC093801.1", 0.102686272020481, -0.0533240139618846, 3.35247519753738, -0.0159058638229612, 0.987309491940711, NA  
"17331", "NEIL3", 0.313540715310845, 1.26351236233866, 2.5977368350737, 0.486389670146404, 0.62669091310095, NA  
"17332", "AC078881.1", 1.59509061199747, 0.228958495822727, 1.34117938672598, 0.170714296751643, 0.864448420673423, NA  
"17333", "TENM3-AS1", 2.0520433017334, -2.04019300199786, 1.22024705275145, -1.67195077209781, 0.0945340297633984, NA  
"17334", "AC079766.1", 0.857868741711641, 0.339151334747812, 1.61443183239485, 0.210074732139489, 0.833609346271996, NA  
"17335", "AC019193.2", 0.166727055861678, -0.774663427007578, 3.35247519753738, -0.231072082972193, 0.817258802814835, NA  
"17336", "CLDN22", 0.183715948661733, 0.576034712544328, 3.34068880739852, 0.172429922616139, 0.863099549623161, NA  
"17337", "AC107214.2", 0, NA, NA, NA, NA, NA  
"17338", "AC074194.1", 0.0534622507802646, -0.0533240139618838, 3.35247519753738, -0.015905863822961, 0.987309491940711, NA  
"17339", "LINC02363", 0.49851812457646, 1.89826263371827, 2.07231979098979, 0.916008543648377, 0.359662413822399, NA  
"17340", "AC099343.4", 0.734839398812278, 0.369207502038588, 1.65890895209017, 0.222560437432927, 0.823877630485857, NA  
"17341", "LINC02365", 0, NA, NA, NA, NA, NA  
"17342", "AC084871.1", 0.656845374512514, 2.38764475290751, 2.50897497824501, 0.951641516400306, 0.341278818789885, NA  
"17343", "LINC01093", 0, NA, NA, NA, NA, NA  
"17344", "C4orf47", 2.1611901298919, 0.35518726207254, 1.11103954152621, 0.319689127881648, 0.749204002316745, NA  
"17345", "AC093797.1", 0.284240190223044, 0.69583062743856, 3.33747149429751, 0.208490358233014, 0.834846110249776, NA  
"17346", "AC107050.1", 0.338834096020616, -0.774667674034573, 2.96546850953071, -0.261229438635032, 0.793915577320881, NA  
"17347", "AC108865.1", 0.427790636860191, -0.433170517474036, 2.4459519051406, -0.177096907164712, 0.859432271254146, NA  
"17348", "AC097652.1", 0.0644961186387932, -0.0533240139618838, 3.35247519753738, -0.015905863822961, 0.987309491940711, NA  
"17349", "FRG1-DT", 1.8730906059036, -0.205856618540633, 0.985852071869565, -0.208810859574751, 0.834595893493403, NA  
"17350", "AC021087.1", 0, NA, NA, NA, NA, NA  
"17351", "AHRR", 0.559658792635964, 2.17518877021511, 2.27224739830494, 0.95728518463164, 0.338423331136756, NA  
"17352", "SLC9A3", 1.14238122487776, 0.0742317464534201, 1.30689150892591, 0.0568002362448807, 0.954704325747417, NA  
"17353", "AC026740.1", 0.156148522800746, 0.494635591052761, 3.34300496985029, 0.147961368742719, 0.882373255878367, NA  
"17354", "AC122719.3", 0.100823152638361, -1.35173207482145, 3.35247519753738, -0.40320419844251, 0.686798011343181, NA  
"17355", "SLC6A3", 0.410745088081924, 1.66416763505049, 3.3004354676269, 0.504226685046224, 0.614102090381297, NA

"17356", "AC026412.3", 0, NA, NA, NA, NA, NA  
"17357", "AC126768.1", 0.102230937222884, -1.35173207482145, 3.35247519753  
738, -0.403204198442509, 0.686798011343181, NA  
"17358", "AC091891.1", 0, NA, NA, NA, NA, NA  
"17359", "AC094105.2", 0.532322451936995, 0.617355418495398, 2.33029111312  
859, 0.264926306853805, 0.791066232251597, NA  
"17360", "LINC02145", 0.875902500347965, -0.908919510870816, 1.72583459715  
415, -0.526655052789877, 0.598433153867495, NA  
"17361", "LINC01018", 0.205372544040962, 0.695830627438559, 3.337471494297  
51, 0.208490358233014, 0.834846110249776, NA  
"17362", "LINC02102", 0.565563018177596, -0.143280416756229, 2.06220146229  
501, -0.0694793497996906, 0.944608069398088, NA  
"17363", "AC091965.4", 0.128992237277586, 0.513744972953418, 3.34245151459  
318, 0.153703044220807, 0.877843884367224, NA  
"17364", "AC091932.1", 0.102686272020481, -0.0533240139618846, 3.352475197  
53738, -0.0159058638229612, 0.987309491940711, NA  
"17365", "AC034229.1", 0, NA, NA, NA, NA, NA  
"17366", "AC034229.4", 0.271112332389108, 0.99816176680834, 3.203674282550  
25, 0.31156780583005, 0.755369004332501, NA  
"17367", "AC012640.1", 0.694664739709251, 0.531234888631798, 1.80557819519  
894, 0.294218710684677, 0.768590784014449, NA  
"17368", "AC012640.4", 0.855922348217338, 1.63965143123249, 1.627580807939  
72, 1.00741629738682, 0.313734762782021, NA  
"17369", "LINC01513", 1.41834977055587, 1.29504725336996, 1.47004047805824  
, 0.880960267897228, 0.378339325413624, NA  
"17370", "AC016549.1", 0, NA, NA, NA, NA, NA  
"17371", "AC010491.1", 1.75635258856005, 1.02625564910557, 1.1008862507484  
5, 0.932208616837443, 0.351228723165452, NA  
"17372", "AC010491.2", 0.450967246084722, 0.50739067070566, 2.470069720897  
17, 0.205415525891053, 0.83724749100597, NA  
"17373", "LINC02149", 0.0644961186387932, -0.0533240139618838, 3.352475197  
53738, -0.015905863822961, 0.987309491940711, NA  
"17374", "AC114964.2", 1.69511104891718, 1.28723811417053, 1.3562598929835  
8, 0.949108737071616, 0.34256531116952, NA  
"17375", "AC010638.1", 0, NA, NA, NA, NA, NA  
"17376", "AC024588.1", 0, NA, NA, NA, NA, NA  
"17377", "AC022113.1", 0.11921983002294, -0.0533240139618846, 3.3524751975  
3738, -0.0159058638229612, 0.987309491940711, NA  
"17378", "AC026790.1", 0.11921983002294, -0.0533240139618846, 3.3524751975  
3738, -0.0159058638229612, 0.987309491940711, NA  
"17379", "AC026785.2", 0.203054089861245, -1.95461545718866, 3.33573296423  
696, -0.585962808817275, 0.557900507779092, NA  
"17380", "LINC02217", 0.0534622507802646, -0.0533240139618838, 3.352475197  
53738, -0.015905863822961, 0.987309491940711, NA  
"17381", "H3.Y", 0.40309912949739, 1.72246360344407, 2.38566401784184, 0.72  
2005944911837, 0.470290822507867, NA  
"17382", "LINC02223", 2.15106480918267, -0.372237055007782, 1.251958010081  
8, -0.297323913430181, 0.766219226410967, NA  
"17383", "LINC02241", 0.388754544244317, -0.996605359492112, 2.22763513584  
566, -0.447382672079187, 0.654598784815931, NA

"17384","AC091946.2",0.357794828077467,-0.832145279297815,2.5633591609  
9246,-0.324630778222912,0.745460530139509,NA  
"17385","CDH12",2.1315024862455,-3.08783694823943,1.26177956524644,-2.  
44720792227787,0.014396775944567,NA  
"17386","AC091938.1",0.784535597400402,-2.72218198168036,1.79112043592  
231,-1.51982073739146,0.128556035717503,NA  
"17387","C5orf17",1.6806282236889,-0.241226458061406,1.10565795774386,  
-0.218174577745218,0.827293091989749,NA  
"17388","CDH10",0.100823152638361,-1.35173207482145,3.35247519753738,-  
0.40320419844251,0.686798011343181,NA  
"17389","LINC02211",0.23843966004588,0.69583062743856,3.33747149429751  
,0.208490358233014,0.834846110249776,NA  
"17390","AC113370.1",2.16643987946512,0.410715602173075,1.021093609601  
12,0.402231096455022,0.687513958783414,NA  
"17391","PURPL",0.390592725985015,-1.78963817496023,2.89500967362667,-  
0.618180378208648,0.536456442907482,NA  
"17392","CDH6",0.102686272020481,-0.0533240139618846,3.35247519753738,  
-0.0159058638229612,0.987309491940711,NA  
"17393","AC010343.3",0.231678509298067,0.99788326475647,3.330296382547  
71,0.299637975162162,0.764453314336329,NA  
"17394","AC034223.1",0.441949084704722,0.631648184503036,2.48013843998  
428,0.254682631549809,0.798968232005048,NA  
"17395","AC034231.1",0.592719303700756,-0.0619343179526814,1.851857674  
15536,-0.0334444265437029,0.973320182203186,NA  
"17396","SLC45A2",0.102686272020481,-0.0533240139618846,3.352475197537  
38,-0.0159058638229612,0.987309491940711,NA  
"17397","AC139792.1",0.219614265997676,-1.35173207482145,3.35247519753  
738,-0.40320419844251,0.686798011343181,NA  
"17398","AC026801.2",1.54517337243416,0.262297782511371,1.266811795130  
14,0.207053473546498,0.835968097381985,NA  
"17399","PRLR",0.525783344543027,-1.13171016034231,2.07672049086244,-0  
.544950639877554,0.585787466375985,NA  
"17400","UGT3A2",0.102686272020481,-0.0533240139618846,3.3524751975373  
8,-0.0159058638229612,0.987309491940711,NA  
"17401","AC008957.2",0,NA,NA,NA,NA,NA  
"17402","AC008957.1",0.478877777482527,0.807065019103059,2.13680543565  
313,0.377697007709256,0.705655690939593,NA  
"17403","AC026741.1",0.99533724464597,2.014154303963,1.5797381848984,1  
.27499247863819,0.202311904178679,NA  
"17404","GDNF",0.604938915830164,-3.23586097412604,2.92356653124886,-1  
.10681968053033,0.268371897544613,NA  
"17405","AC010457.1",2.23064083240907,-0.639717276373816,1.29702640252  
368,-0.493218391799189,0.621858283909111,NA  
"17406","AC008964.1",0,NA,NA,NA,NA,NA  
"17407","C9",0.605136018502385,-1.50852246069785,2.00736238346345,-0.7  
51494833780376,0.452354908762981,NA  
"17408","AC108105.1",0,NA,NA,NA,NA,NA  
"17409","AC114977.1",0,NA,NA,NA,NA,NA  
"17410","PLCXD3",1.50404292379135,-3.8839422961472,1.51882418242051,-2  
.55720335579425,0.0105517512435433,NA

"17411", "AC008945.1", 0.912882207094397, 1.6647778458009, 1.8728290311531  
8, 0.888910743110292, 0.374051051272981, NA  
"17412", "AC008945.2", 0, NA, NA, NA, NA, NA  
"17413", "AC008875.1", 0.802827192271096, -0.779207705015964, 1.6766763177  
2166, -0.464733530723917, 0.642122293094239, NA  
"17414", "AC025171.5", 0.474760934281698, -0.799747310488363, 2.4020481004  
1928, -0.332943919960956, 0.739176615583486, NA  
"17415", "AC114947.2", 0.221906102043421, 0.695830468846429, 3.33747149841  
039, 0.208490310457437, 0.834846147549618, NA  
"17416", "AC114956.1", 0, NA, NA, NA, NA, NA  
"17417", "LINC02224", 0, NA, NA, NA, NA, NA  
"17418", "HCN1", 1.03448076392774, -0.885318376484816, 1.39607994352039, -0  
.63414590302929, 0.525985608149186, NA  
"17419", "AC010478.1", 0.102686272020481, -0.0533240139618846, 3.352475197  
53738, -0.0159058638229612, 0.987309491940711, NA  
"17420", "ISL1", 0.203509424658842, -0.774663427007579, 3.35247519753738, -  
0.231072082972194, 0.817258802814834, NA  
"17421", "AC022126.1", 0.284539101300094, -0.150986859606036, 2.7266716240  
8639, -0.0553740532128162, 0.955840466649586, NA  
"17422", "ITGA2", 1.85700760665217, 0.774619025123807, 1.28285456812004, 0.  
603824505422287, 0.545960325280338, NA  
"17423", "AC008966.2", 0.762406824673265, 0.426508667889785, 1.65766241935  
692, 0.257295250775636, 0.796950858408854, NA  
"17424", "AC027329.1", 0.782225238311797, 0.78090079357966, 1.769247417753  
42, 0.441374556064771, 0.65894185923255, NA  
"17425", "AC025175.1", 0.400954889932749, 1.59850620341007, 2.476587402996  
08, 0.645447118674776, 0.518637476998728, NA  
"17426", "AC025175.2", 2.24514731753263, 0.0679598169574051, 1.03533795372  
556, 0.0656402256991147, 0.947664262678007, NA  
"17427", "AC016583.2", 0.985992823361254, 0.634419867412545, 1.62331504296  
969, 0.390817463412363, 0.695932165633496, NA  
"17428", "ESM1", 0, NA, NA, NA, NA, NA  
"17429", "AC034238.1", 0.261339925134462, 0.693947743382389, 3.27302645474  
789, 0.212020206062111, 0.832091270506721, NA  
"17430", "CDC20B", 0, NA, NA, NA, NA, NA  
"17431", "CCNO", 0.984641237660317, -3.06036831413009, 1.92863184719229, -1  
.58680793256908, 0.11255615167806, NA  
"17432", "IL31RA", 2.26023878734472, 0.66237575603987, 1.02683312079945, 0.  
645066605880587, 0.518884023404898, NA  
"17433", "AC008892.1", 0.355969098232581, 1.48906456640928, 2.957474888551  
2, 0.503491871452117, 0.614618493861351, NA  
"17434", "ANKRD55", 1.66092550947555, 1.47259519735187, 1.31059064993574, 1  
.12361185960244, 0.261177722692565, NA  
"17435", "AC022431.1", 0.275368352823686, 1.11865680170283, 2.739778946225  
96, 0.408301846119294, 0.683052084109357, NA  
"17436", "AC008937.3", 0.511516176823821, 0.424631114698905, 2.36202921759  
038, 0.179773862040577, 0.857330104347155, NA  
"17437", "AC008780.1", 1.88375846486278, 2.11795907230143, 3.2224846657278  
8, 0.65724411191978, 0.511023965917808, NA  
"17438", "GAPT", 1.81890838485158, -0.846162816145486, 1.1100466414577, -0.



762276813012392,0.445894809687241,NA  
"17439","RAB3C",0,NA,NA,NA,NA,NA  
"17440","AC092343.1",0,NA,NA,NA,NA,NA  
"17441","PART1",0.55774542366461,0.990353931193589,2.09589516086475,0.472520739436688,0.63655514195125,NA  
"17442","DEPDC1B",0.645701282042001,-1.98829733899426,2.16259785995084,-0.919402250328436,0.357885212717503,NA  
"17443","ELOVL7",0.409379083689134,-1.78470406805556,2.82546474996282,-0.631649737650787,0.527615778260201,NA  
"17444","AC104113.1",2.13210929512573,0.86672592722982,1.02926266331181,0.84208429793907,0.399740769748333,NA  
"17445","C5orf64",0,NA,NA,NA,NA,NA  
"17446","LRRC70",0.160386752340794,0.715986771710925,3.33695183420161,0.214563112470645,0.830107956063492,NA  
"17447","RGS7BP",0.0644961186387932,-0.0533240139618838,3.35247519753738,-0.015905863822961,0.987309491940711,NA  
"17448","AC092354.2",1.04444794240702,1.3963379434307,1.51219860851713,0.923382640062049,0.355807835248182,NA  
"17449","AC092354.1",1.08496624577184,-0.910673488101049,1.34978641034211,-0.674679698301479,0.499879285617895,NA  
"17450","AC025176.1",0.102230937222884,-1.35173207482145,3.35247519753738,-0.403204198442509,0.686798011343181,NA  
"17451","AC010359.2",1.2136735316457,2.31111258431344,1.64526318724887,1.40470691997794,0.160108447180564,NA  
"17452","AC025442.2",0.128992237277586,0.513744972953418,3.34245151459318,0.153703044220807,0.877843884367224,NA  
"17453","AC092353.2",1.45769923387519,1.19551512800052,1.56648367673335,0.763183904024828,0.445353726721874,NA  
"17454","MAST4-IT1",0.602465857200823,2.16140165930903,2.28785713317083,0.944727547875099,0.344797989196728,NA  
"17455","MAST4-AS1",1.46046385468838,0.402784321063201,1.20852653185028,0.333285459977887,0.738918813854616,NA  
"17456","CD180",0.489000975745863,-1.20732043040348,2.08877732135987,-0.578003417624944,0.563261811855226,NA  
"17457","LINC02242",1.35821259613299,0.0793154282287408,1.23534301318253,0.064205186237631,0.948806847897261,NA  
"17458","AC010280.2",0.0534622507802646,-0.0533240139618838,3.35247519753738,-0.015905863822961,0.987309491940711,NA  
"17459","AC093523.1",0.160386752340794,0.715986771710925,3.33695183420161,0.214563112470645,0.830107956063492,NA  
"17460","LINC02198",1.45043140712312,-0.300403024842709,1.27996804414842,-0.234695722456549,0.81444490800484,NA  
"17461","AC010273.2",0.662138391346664,0.446415415051615,1.69024251453518,0.264113232990345,0.791692667381787,NA  
"17462","MARVELD2",0.166727055861678,-0.774663427007578,3.35247519753738,-0.231072082972193,0.817258802814835,NA  
"17463","SERF1B",1.27348545759402,-0.153699383038359,1.51320030399006,-0.101572397674703,0.919096089573817,NA

"17464", "LINC02197", 0, NA, NA, NA, NA, NA  
"17465", "AC025774.1", 1.84874976769679, 0.610955026843599, 1.395721645338  
61, 0.43773414912927, 0.661579011526085, NA  
"17466", "ZNF366", 0.269388390240736, -2.09481427187859, 3.17548848369632,  
-0.659682528415343, 0.509457580965155, NA  
"17467", "AC035140.1", 0.455088844623808, -1.25046312410201, 2.43755523530  
03, -0.512998887571037, 0.607952098847436, NA  
"17468", "AC008972.1", 0.407971299104611, -1.79834607012566, 2.41733763908  
095, -0.743936652063789, 0.456914800262726, NA  
"17469", "AC008972.2", 1.42936016669679, 0.422598754062664, 1.221029226687  
71, 0.346100441190134, 0.729267231874307, NA  
"17470", "TMEM171", 0, NA, NA, NA, NA, NA  
"17471", "FAM169A", 0.213849003121058, 0.96816891762709, 3.33094636315095,  
0.290658813464423, 0.771312274283839, NA  
"17472", "AC010501.2", 0, NA, NA, NA, NA, NA  
"17473", "GCNT4", 2.06106275328198, 0.531827003215042, 1.07456208412925, 0.  
49492440787728, 0.620653480804315, NA  
"17474", "AC008897.3", 0.296405498530148, -0.22601836373236, 2.68538977137  
194, -0.0841659434849525, 0.932924495242752, NA  
"17475", "AC010245.1", 1.52920281917614, 0.622537842998929, 1.144602792110  
09, 0.543889851824729, 0.586517272758307, NA  
"17476", "ANKDD1B", 0.499228717798106, -0.0385438235881588, 2.123501602626  
12, -0.0181510687538413, 0.985518337674813, NA  
"17477", "SV2C", 0, NA, NA, NA, NA, NA  
"17478", "AC026725.1", 0, NA, NA, NA, NA, NA  
"17479", "F2RL2", 0.266142423915515, -1.3728236824524, 3.23491314131495, -0  
.424377293139429, 0.671290677960157, NA  
"17480", "F2RL1", 0.797023360072819, -2.04951547073991, 1.86029737663785, -  
1.10171389611054, 0.270586073738344, NA  
"17481", "S100Z", 0.524386545930497, 0.944737273798507, 2.3874145804368, 0.  
395715633782239, 0.692314820910874, NA  
"17482", "CRHBP", 1.12383729939549, -0.788010870754188, 1.55910069530065, -  
0.505426540523884, 0.613259281650283, NA  
"17483", "BHMT", 1.76751373156717, 1.16894029418919, 1.34142793083333, 0.87  
1414905952507, 0.383527649837446, NA  
"17484", "AC012636.1", 0.825360362525656, 1.56016504413876, 1.924929532724  
74, 0.810505017256577, 0.417649982609394, NA  
"17485", "AC010260.1", 0, NA, NA, NA, NA, NA  
"17486", "ANKRD34B", 0, NA, NA, NA, NA, NA  
"17487", "RASGRF2-  
AS1", 0.168565237602375, -1.35173207482145, 3.35247519753738, -0.403204198  
44251, 0.686798011343181, NA  
"17488", "RASGRF2", 0.784618139364254, 0.0767064598961903, 1.7514399162459  
1, 0.0437962268557892, 0.965066834733129, NA  
"17489", "CKMT2", 1.70306627619574, -0.954943898101635, 1.22120347447287, -  
0.781969522739719, 0.434232485026845, NA  
"17490", "AC010623.1", 2.23679116426001, 1.16552238867631, 1.0900032422657  
1, 1.06928341447281, 0.284941981757429, NA  
"17491", "AC026726.1", 1.2313313243195, -0.109371726141243, 1.780403412539  
14, -0.0614308675050565, 0.951016070059862, NA

"17492", "LINC01338", 0, NA, NA, NA, NA, NA  
"17493", "VCAN-  
AS1", 1.74039998261125, -0.694182142876283, 1.16913610365759, -0.593756484  
5569, 0.552674997794161, NA  
"17494", "LINC01949", 0.965607238515152, -0.343109307633543, 1.39832008467  
163, -0.2453725090519, 0.806168013066678, NA  
"17495", "AC018754.1", 0.652374811331461, 1.00347705593726, 1.807387956944  
91, 0.555208444363804, 0.57875209367317, NA  
"17496", "AC114971.1", 0.580944599830241, 0.147731932601095, 1.87878602280  
47, 0.0786315901906471, 0.937325659984746, NA  
"17497", "LINC02060", 0.102686272020481, -0.0533240139618846, 3.3524751975  
3738, -0.0159058638229612, 0.987309491940711, NA  
"17498", "MEF2C-  
AS1", 0.944158952470862, 0.247892642077632, 1.82467480761809, 0.1358557925  
18574, 0.891935283826962, NA  
"17499", "AC093510.2", 0.309302485770796, 1.17088912763199, 2.661838949102  
63, 0.439879778611974, 0.660024182340411, NA  
"17500", "AC093510.1", 0.286523607021433, -0.265776410372375, 2.7120035889  
7697, -0.0980000216270479, 0.921932276195533, NA  
"17501", "ADGRV1", 0.696193910632993, -0.586640995031828, 1.64302516321969  
, -0.357049306464815, 0.721054893961995, NA  
"17502", "AC123595.1", 1.26073095510891, -0.759417840392342, 1.23498721198  
965, -0.614919598372898, 0.538607819276382, NA  
"17503", "AC123595.2", 1.17491602877437, 0.496756128422551, 1.581994612439  
59, 0.314006207427283, 0.753516324202485, NA  
"17504", "ARRDC3-  
AS1", 0.515351135462737, -0.00368517133124277, 2.08241997206493, -0.001769  
65808082822, 0.998588017876389, NA  
"17505", "AC106818.2", 0.0644961186387932, -0.0533240139618838, 3.35247519  
753738, -0.015905863822961, 0.987309491940711, NA  
"17506", "AC108102.1", 0.11921983002294, -0.0533240139618846, 3.3524751975  
3738, -0.0159058638229612, 0.987309491940711, NA  
"17507", "AC099501.1", 0.443356869289245, 0.631510007619988, 2.47802647528  
698, 0.254843930812666, 0.798843643306955, NA  
"17508", "AC008840.1", 0.172682080803205, 0.494635591052761, 3.34300496985  
029, 0.147961368742719, 0.882373255878367, NA  
"17509", "AC008592.5", 0.72976770264217, 2.50718499018371, 1.8161777630166  
9, 1.38047334420571, 0.167440951366191, NA  
"17510", "PCSK1", 1.22254539732782, -1.88837982302922, 1.72800924710677, -1  
.09280654961249, 0.27447874533939, NA  
"17511", "AC020900.1", 0.204917209243366, -0.774663427007578, 3.3524751975  
3738, -0.231072082972194, 0.817258802814834, NA  
"17512", "AC008906.2", 1.39371093738517, 1.303712739983, 1.64273750821332,  
0.79362206893355, 0.427415480839956, NA  
"17513", "LIX1-AS1", 0, NA, NA, NA, NA, NA  
"17514", "LIX1", 0, NA, NA, NA, NA, NA  
"17515", "LINC01340", 0.166727055861678, -0.774663427007578, 3.35247519753  
738, -0.231072082972193, 0.817258802814835, NA  
"17516", "LINC02234", 0.423673793659361, -1.96577570544734, 2.404287638655  
95, -0.817612532644492, 0.413578469008651, NA

"17517", "RGMB-  
AS1", 1.56454215143872, -0.285879465073495, 1.20483397593528, -0.237277061  
224618, 0.812441856513796, NA  
"17518", "AC113385.1", 0, NA, NA, NA, NA, NA  
"17519", "AC021086.1", 1.68780567289022, -0.638954900450918, 1.05938458111  
017, -0.603137814013991, 0.546417012567618, NA  
"17520", "SLC06A1", 1.10150863101374, -0.698007617371792, 1.44975527722594  
, -0.481465822774865, 0.630185464641404, NA  
"17521", "AC024587.2", 0.514055580138991, 0.895327462645221, 2.36413672516  
355, 0.378712217916788, 0.704901579453191, NA  
"17522", "AC012603.1", 1.59824617817193, 1.23951471832682, 1.2261789577946  
4, 1.01087586803493, 0.31207584535103, NA  
"17523", "AC104126.1", 0, NA, NA, NA, NA, NA  
"17524", "AC079465.1", 0.183715948661733, 0.576034712544328, 3.34068880739  
852, 0.172429922616139, 0.863099549623161, NA  
"17525", "TRIM36", 0.0644961186387932, -0.0533240139618838, 3.352475197537  
38, -0.015905863822961, 0.987309491940711, NA  
"17526", "LINCADL", 1.92522558302333, 2.17239119242473, 1.33548100706356, 1  
.62667322180893, 0.103806518942223, NA  
"17527", "ARL14EPL", 1.99420211760645, 1.2148665492397, 1.13353568497749, 1  
.07174971669624, 0.283832463654965, NA  
"17528", "SEMA6A-  
AS2", 1.78153116760165, 0.395900619856613, 1.49950031191516, 0.26402169890  
2463, 0.791763198519486, NA  
"17529", "LINC02147", 0, NA, NA, NA, NA, NA  
"17530", "AC008629.1", 0.77471845696101, -0.128459735335237, 1.56440337755  
586, -0.0821142022436287, 0.934555899507337, NA  
"17531", "AC114284.1", 1.38983573077796, -2.19290762998759, 1.658631711167  
85, -1.32211847586319, 0.186128702355024, NA  
"17532", "AC010255.1", 1.1368362757599, -1.53437260560294, 1.5626376654768  
7, -0.981911955344237, 0.326143225414175, NA  
"17533", "ZNF474", 0.439657248658977, -1.50832565035379, 2.39823821350385,  
-0.628930704990358, 0.529394423116454, NA  
"17534", "AC010255.2", 1.14324109507306, -0.770171777180563, 1.58463587803  
472, -0.486024447544212, 0.626949832555692, NA  
"17535", "LINC02201", 0.172682080803205, 0.494635591052761, 3.343004969850  
29, 0.147961368742719, 0.882373255878367, NA  
"17536", "AC106786.1", 2.02575250657954, 0.758060101354314, 1.091464279338  
7, 0.694534961614693, 0.487346783388703, NA  
"17537", "LINC01170", 0.44068762410084, 0.693936682145018, 1.9689742465661  
8, 0.35243563157579, 0.724511583872172, NA  
"17538", "AC093535.1", 0.195582345891787, 0.494635591052761, 3.34300496985  
029, 0.147961368742719, 0.882373255878367, NA  
"17539", "MEGF10", 0.504283172884345, 0.797864312304353, 2.42809125404072,  
0.32859733380143, 0.742460063579519, NA  
"17540", "FBN2", 0.273076516777941, -0.774665331385065, 3.18476194606587, -  
0.243241204367569, 0.807818548712931, NA  
"17541", "MEIKIN", 0.102230937222884, -1.35173207482145, 3.35247519753738,  
-0.403204198442509, 0.686798011343181, NA  
"17542", "ACSL6", 2.30125527021304, -0.496087644083557, 0.99448121069583, -

0.498840640474694,0.61789165450303,NA  
"17543","AC116366.2",0,NA,NA,NA,NA,NA  
"17544","IL13",0.231223174500471,-0.207595008908767,3.34245142718562,-  
0.062108609034766,0.950476341218052,NA  
"17545","IL4",0.286523607021433,-0.265776410372375,2.71200358897697,-0  
.0980000216270479,0.921932276195533,NA  
"17546","CCNI2",0.629877401148032,-0.496856400614471,2.01776725039177,  
-0.246240690306576,0.805495918747068,NA  
"17547","GDF9",0.583640463152619,0.622676056098812,2.09487337541889,0.  
297238039971891,0.76628478180233,NA  
"17548","AC010240.3",0.608814773392418,2.18883453786234,2.220386246615  
47,0.985789990907563,0.324236178388287,NA  
"17549","AC113410.4",1.85137713997743,1.08483288414483,1.0928759055666  
9,0.9926404989067,0.320885181048134,NA  
"17550","AC104109.2",0.167182390659274,0.576034712544328,3.34068880739  
852,0.172429922616139,0.863099549623161,NA  
"17551","LINC01843",0.704601261839068,0.644654723512213,1.966608619885  
72,0.32780021250475,0.743062726637957,NA  
"17552","CATSPER3",1.12401116562716,-0.324918216483602,1.3333986135251  
, -0.243676731914859,0.807481195478757,NA  
"17553","C5orf66",0.616450632237046,0.266875570310909,2.04219743918142  
,0.130680591989128,0.896027986015719,NA  
"17554","AC026691.1",0.817714403941121,1.61872307604902,1.841137381851  
13,0.879197333129758,0.379294290185247,NA  
"17555","DCANP1",0,NA,NA,NA,NA,NA  
"17556","TIFAB",0,NA,NA,NA,NA,NA  
"17557","AC034206.1",0.41353133857768,0.614206680598069,2.486733026084  
03,0.246993414313272,0.804913320826333,NA  
"17558","SLC25A48-AS1",0,NA,NA,NA,NA,NA  
"17559","AC002428.2",0.271251509622856,-0.774665352300728,3.1828708973  
8686,-0.243385728568736,0.8077065984266,NA  
"17560","MYOT",0,NA,NA,NA,NA,NA  
"17561","PKD2L2",1.18323678422276,-0.122030984517372,1.33818919435809,  
-0.0911911297982854,0.927340722982857,NA  
"17562","KIF20A",0.441949084704722,0.631648184503036,2.48013843998428,  
0.254682631549809,0.798968232005048,NA  
"17563","CDC25C",0.412916269936782,-1.51539988922005,2.4355798329174,-  
0.622192657673989,0.533815193406262,NA  
"17564","AC104116.1",0.142120095111522,-0.0533240139618842,3.352475197  
53738,-0.0159058638229611,0.987309491940711,NA  
"17565","AC011405.1",1.56511431109769,-0.163666145283008,1.11347023547  
385,-0.146987445257896,0.883141929915854,NA  
"17566","AC135457.1",0.815747689114311,1.69456644998988,1.726148711780  
62,0.981703626358956,0.326245878362832,NA  
"17567","SLC23A1",0.370691815318116,0.409327796421713,2.565354855683,0  
.159559912545796,0.873227759460615,NA  
"17568","PROB1",0.360901617168941,0.230411879331194,2.25850683522134,0  
.102019562543681,0.918741147434149,NA  
"17569","ECSCR",0.870648518698839,-1.75440487213575,1.62962605877659,-  
1.07656898506694,0.281672866359793,NA

"17570","AC113361.1",0.102686272020481,-0.0533240139618846,3.35247519753738,-0.0159058638229612,0.987309491940711,NA  
"17571","PSD2",0.154285403418625,-0.774663427007578,3.35247519753738,-0.231072082972193,0.817258802814835,NA  
"17572","SLC4A9",0.11921983002294,-0.0533240139618846,3.35247519753738,-0.0159058638229612,0.987309491940711,NA  
"17573","AC008438.1",0.286402220682214,1.17253773374183,2.71767620516714,0.431448651429658,0.666142181249859,NA  
"17574","DND1",1.71993165231824,0.509469767993721,1.32132643828522,0.385574490324205,0.699811828799698,NA  
"17575","PCDHA3",0.976691905773575,2.06745064084391,1.64327389227399,1.25812906209016,0.208345084497596,NA  
"17576","PCDHA4",1.68694491646284,-0.104924562707574,1.19214723351678,-0.0880130907975614,0.929866271568966,NA  
"17577","PCDHA5",0.414363867949205,0.555913947657834,2.16963488019048,0.256224654541426,0.797777372334948,NA  
"17578","PCDHA7",0.717463761509049,1.5305372664195,1.73146136271371,0.883956927586702,0.376719464632951,NA  
"17579","PCDHA9",0.674741243556835,0.626441298545006,1.91098498739,0.327810685420712,0.743054807574617,NA  
"17580","PCDHA11",0.0534622507802646,-0.0533240139618838,3.35247519753738,-0.015905863822961,0.987309491940711,NA  
"17581","PCDHA12",1.19915896693525,2.23601242662678,1.76632072132735,1.26591530044808,0.205543407925006,NA  
"17582","PCDHA13",0,NA,NA,NA,NA,NA  
"17583","PCDHAC1",0.308058816061443,1.2759273050851,3.31959886931736,0.384361892901681,0.700710240394097,NA  
"17584","AC244517.5",0.284539101300094,-0.150986859606036,2.72667162408639,-0.0553740532128162,0.955840466649586,NA  
"17585","PCDHB8",1.3675404399933,1.01389636886164,1.34942761971049,0.751352909968717,0.452440294588149,NA  
"17586","SLC25A2",0,NA,NA,NA,NA,NA  
"17587","AC005618.4",1.08126494464902,-1.13838577353847,1.3154590961332,-0.865390476134729,0.386824506531112,NA  
"17588","AC005618.1",1.15400429961872,-0.0973549578903883,1.52697100153562,-0.0637569133876689,0.949163786554577,NA  
"17589","PCDHGB1",1.21212030130873,-0.237171544923159,1.29604683622643,-0.182996121971724,0.854801061457565,NA  
"17590","PCDHGA4",1.4956554307322,-0.443454937200672,1.10529491717191,-0.401209605066611,0.688265809639549,NA  
"17591","PCDHGB3",1.49902865618843,2.73920379766506,1.47130890218032,1.86174622718985,0.0626388692751609,NA  
"17592","AC008781.3",0.519463576923382,0.730787141708877,2.08421355900937,0.350629684059931,0.725866184020211,NA  
"17593","PCDHGC4",0.308058816061443,1.2759273050851,3.31959886931736,0.384361892901681,0.700710240394097,NA  
"17594","PCDHGC5",0,NA,NA,NA,NA,NA  
"17595","AC008781.2",0.257924125226034,-1.38354199007994,3.26926698797967,-0.423196390862814,0.672151979809054,NA  
"17596","RELL2",1.78004008616126,-0.130900276821333,1.25768636420006,-

0.104080222659161,0.917105685638977,NA  
"17597","ARAP3",0.782781638116105,-0.493357863384003,1.92692664312258,  
-0.256033547070851,0.797924933612533,NA  
"17598","AC005753.3",0,NA,NA,NA,NA,NA  
"17599","PCDH1",0.394132848049029,0.436200404954529,2.52699059775496,0  
.172616552409043,0.862952840268597,NA  
"17600","PCDH12",0.320437418636037,-2.09332987365482,3.0035528561136,-  
0.696951235399085,0.485833312087704,NA  
"17601","AC005740.4",0.511516176823821,0.424631114698905,2.36202921759  
038,0.179773862040577,0.857330104347155,NA  
"17602","ARHGAP26-AS1",0,NA,NA,NA,NA,NA  
"17603","ARHGAP26-  
IT1",0.201646305276721,-1.9490730241217,3.3359781915796,-0.58425832310  
3367,0.559046527482917,NA  
"17604","HMHB1",0.142120095111522,-0.0533240139618842,3.35247519753738  
, -0.0159058638229611,0.987309491940711,NA  
"17605","AC132803.1",0.68458332163765,-0.329327704235829,1.66530967636  
365,-0.197757635657859,0.843234693344876,NA  
"17606","AC137770.1",0.546498476107323,2.05910874792268,2.650741408339  
3,0.776804837108847,0.437273922505246,NA  
"17607","AC008700.1",0,NA,NA,NA,NA,NA  
"17608","SH3RF2",0.708394256321425,1.44558036757931,1.78734360195897,0  
.808787054707843,0.418637643643675,NA  
"17609","PLAC8L1",0.56722661099683,0.100947047652593,1.88166826769776,  
0.0536476324682367,0.957215905905684,NA  
"17610","POU4F3",0.221906102043421,0.695830468846429,3.33747149841039,  
0.208490310457437,0.834846147549618,NA  
"17611","PPP2R2B",1.28123333113069,-0.253345517220242,1.45217153699329  
, -0.174459773357624,0.861504142126856,NA  
"17612","JAKMIP2",1.0299570331733,-0.228963915326673,1.40151185116861,  
-0.163369232401252,0.87022772639047,NA  
"17613","AC011370.1",0,NA,NA,NA,NA,NA  
"17614","SCGB3A2",0,NA,NA,NA,NA,NA  
"17615","SPINK6",0,NA,NA,NA,NA,NA  
"17616","SPINK9",0.43852559364167,0.432995625003632,2.47846108845259,0  
.174703418593499,0.861312681440555,NA  
"17617","AC114939.1",0.548418251467654,0.0743077354628275,2.0642048357  
1643,0.0359982372762136,0.971283764494556,NA  
"17618","SH3TC2",0,NA,NA,NA,NA,NA  
"17619","AC012613.2",0.102686272020481,-0.0533240139618846,3.352475197  
53738,-0.0159058638229612,0.987309491940711,NA  
"17620","PDE6A",0.788102337598388,-0.683473884006749,1.79373842005137,  
-0.381033196572317,0.70317861599436,NA  
"17621","CDX1",1.67314363497282,-0.357034652067852,1.12247218515746,-0  
.318078841319144,0.750425132982512,NA  
"17622","SLC6A7",0.203054089861245,-1.95461545718866,3.33573296423696,  
-0.585962808817275,0.557900507779092,NA  
"17623","MYOZ3",1.92779421052397,-0.926922535144472,1.16395880892713,-  
0.796353382985139,0.425826665575619,NA  
"17624","IRGM",0,NA,NA,NA,NA,NA

"17625","AC011337.1",1.59430186909363,2.00242835682607,1.3305801357283  
3,1.50492879237971,0.13234238494721,NA  
"17626","AC011374.1",0.788423250500493,-1.30555646399984,1.92352939617  
23,-0.678729665685281,0.497309165872713,NA  
"17627","CLMAT3",0.268005543297635,-0.150415693622294,2.77274999608506  
, -0.0542478383679276,0.956737707263394,NA  
"17628","AC091982.3",1.56839841035826,0.777003057754995,1.130578721808  
6,0.687261349224768,0.491918050449691,NA  
"17629","LINC01933",0,NA,NA,NA,NA,NA  
"17630","NMUR2",0.25651634064151,-1.38285975574301,2.79187243968638,-0  
.495316238695472,0.62037691003485,NA  
"17631","AC008625.1",0.370236480520519,-0.776097354626079,2.2581697130  
4894,-0.343684245759458,0.731083760326458,NA  
"17632","PPP1R2B",0.11921983002294,-0.0533240139618846,3.3524751975373  
8,-0.0159058638229612,0.987309491940711,NA  
"17633","TIMD4",0.0534622507802646,-0.0533240139618838,3.3524751975373  
8,-0.015905863822961,0.987309491940711,NA  
"17634","HAVCR1",0.102686272020481,-0.0533240139618846,3.3524751975373  
8,-0.0159058638229612,0.987309491940711,NA  
"17635","AC010609.1",0,NA,NA,NA,NA,NA  
"17636","AC016571.1",0,NA,NA,NA,NA,NA  
"17637","AC008676.1",0.429905162736837,-0.063078146184947,2.4727500328  
6523,-0.0255093096134173,0.979648722907028,NA  
"17638","NIPAL4",0,NA,NA,NA,NA,NA  
"17639","AC106801.1",0.221450767245824,-0.774663427007578,3.3524751975  
3738,-0.231072082972194,0.817258802814834,NA  
"17640","SOX30",0.156148522800746,0.494635591052761,3.34300496985029,0  
.147961368742719,0.882373255878367,NA  
"17641","AC025437.4",0.155693188003149,-0.774663427007578,3.3524751975  
3738,-0.231072082972193,0.817258802814835,NA  
"17642","AC025437.2",0.0534622507802646,-0.0533240139618838,3.35247519  
753738,-0.015905863822961,0.987309491940711,NA  
"17643","AC136424.2",2.14922567764312,1.10894605692701,1.3073975101858  
8,0.848208787524265,0.396321704203012,NA  
"17644","AC136424.1",0,NA,NA,NA,NA,NA  
"17645","AC008691.1",0.503724650634145,-1.81008828864611,2.72203511859  
676,-0.664976096847432,0.506065781782085,NA  
"17646","AC008703.1",0,NA,NA,NA,NA,NA  
"17647","CCNJL",2.20119338834352,0.866884820041301,1.15055252392072,0.  
753450887306933,0.451179013466596,NA  
"17648","MIR3142HG",1.93786471432613,-2.06612696071944,1.1827082273687  
, -1.74694562268851,0.0806467709634076,NA  
"17649","GABRB2",0.726021865235225,-1.74897433604225,2.17926378684093,  
-0.802552837615666,0.422233237088761,NA  
"17650","GABRG2",0,NA,NA,NA,NA,NA  
"17651","HMMR",0.762506209187428,-0.710926190492165,1.69217758214544,-  
0.420125049518038,0.674394104253294,NA  
"17652","AC109466.1",0.611936058561049,-0.497317342623131,2.2880052649  
8228,-0.217358478249385,0.82792898718935,NA  
"17653","TENM2",0.475241206720717,1.88167515318861,2.76893626864574,0.



679566075426115,0.496779256323436,NA  
"17654","WWC1",0.154285403418625,-0.774663427007578,3.35247519753738,-  
0.231072082972193,0.817258802814835,NA  
"17655","AC011365.2",0.663090841133591,-0.322341190558029,1.9824935722  
7936,-0.162593813702719,0.870838258125467,NA  
"17656","INSYN2B",0.100823152638361,-1.35173207482145,3.35247519753738  
,-0.40320419844251,0.686798011343181,NA  
"17657","AC034199.1",0,NA,NA,NA,NA,NA  
"17658","KCNIP1",0.708091508620236,-0.160656007093595,1.97687957140569  
,-0.0812674729494818,0.93522924122881,NA  
"17659","AC027306.1",0.275368352823686,1.11865680170283,2.739778946225  
96,0.408301846119294,0.683052084109357,NA  
"17660","AC008619.1",0,NA,NA,NA,NA,NA  
"17661","GABRP",1.23812650554336,-1.24856945550433,1.4884590819197,-0.  
838833576730921,0.401562705958465,NA  
"17662","NEURL1B",0.704713098249042,0.677951863793745,1.75707722068606  
,-0.38584067667159,0.699614667910385,NA  
"17663","AC022217.3",0.302935778684673,1.24376146070571,3.128474743470  
89,0.397561611549346,0.690953362451962,NA  
"17664","AC008378.1",0,NA,NA,NA,NA,NA  
"17665","STC2",1.04423357794261,1.27550935335797,1.68610695185947,0.75  
6481877944524,0.449360333631621,NA  
"17666","LINC01484",0,NA,NA,NA,NA,NA  
"17667","LINC01485",0,NA,NA,NA,NA,NA  
"17668","FAM153B",0,NA,NA,NA,NA,NA  
"17669","AC138956.2",0.11921983002294,-0.0533240139618846,3.3524751975  
3738,-0.0159058638229612,0.987309491940711,NA  
"17670","GPRIN1",0.944450172393288,0.959728689630637,1.55003779401445,  
0.619164702523177,0.535807862363148,NA  
"17671","HK3",0.996278708460903,-0.0727923961267275,1.47240000745833,-  
0.0494379215960359,0.960570308032398,NA  
"17672","ZNF346-  
IT1",0.415394457959801,1.70916804331239,2.43369107273673,0.70229457734  
3542,0.482495474314805,NA  
"17673","FGFR4",0.373937781643337,-0.0392211674210207,2.93528511374742  
,-0.0133619617519703,0.989339014256,NA  
"17674","F12",0.256971675439106,-0.226175799809587,2.79502848435046,-0  
.0809207494935953,0.935504978368658,NA  
"17675","PRR7-  
AS1",0.490726598386785,0.279517479366979,2.36137810786588,0.1183704881  
63624,0.905774108388092,NA  
"17676","DOK3",1.74395036415282,-0.0464978192085325,1.11391979848328,-  
0.0417425197683391,0.966703957609855,NA  
"17677","FAM153A",0.204461874445769,-1.96013641505178,3.33548947920397  
,-0.587660799793491,0.556759992345141,NA  
"17678","AC106795.2",0.102230937222884,-1.35173207482145,3.35247519753  
738,-0.403204198442509,0.686798011343181,NA  
"17679","COL23A1",0.102686272020481,-0.0533240139618846,3.352475197537  
38,-0.0159058638229612,0.987309491940711,NA  
"17680","AC104117.3",0.373899669416301,-1.51022017278091,2.51010698877

835,-0.601655698156482,0.547403345189504,NA  
"17681","GRM6",0.205372544040962,0.695830627438559,3.33747149429751,0.  
208490358233014,0.834846110249776,NA  
"17682","AC136604.2",0.201646305276721,-1.9490730241217,3.335978191579  
6,-0.584258323103367,0.559046527482917,NA  
"17683","AC136604.3",0.696358025508164,-0.547380504284514,1.7654318608  
0162,-0.310054733030573,0.756519334827686,NA  
"17684","AC010285.3",0,NA,NA,NA,NA,NA  
"17685","AC008610.1",0.826464462150457,1.76867707510465,1.901076512049  
7,0.930355545341889,0.35218702738098,NA  
"17686","SCGB3A1",0.0644961186387932,-0.0533240139618838,3.35247519753  
738,-0.015905863822961,0.987309491940711,NA  
"17687","FLT4",0.0644961186387932,-0.0533240139618838,3.35247519753738  
,-0.015905863822961,0.987309491940711,NA  
"17688","AC022413.2",0,NA,NA,NA,NA,NA  
"17689","BTNL8",0,NA,NA,NA,NA,NA  
"17690","LINC01962",0.421260571274397,-2.6213330357122,2.7448579230317  
2,-0.954997711800293,0.339578854113535,NA  
"17691","AC008443.6",0.749295820475324,2.57745697455192,1.711972893163  
43,1.50554777172273,0.132183304596448,NA  
"17692","AC008443.8",2.02606472826657,-1.04027460144218,1.103525301752  
06,-0.942683053837142,0.34584304378909,NA  
"17693","AC138035.1",0.67950469328938,-0.0735135684552964,2.2824522564  
5029,-0.0322081516700051,0.974306055460565,NA  
"17694","AL031770.1",0,NA,NA,NA,NA,NA  
"17695","AL357054.2",0.102686272020481,-0.0533240139618846,3.352475197  
53738,-0.0159058638229612,0.987309491940711,NA  
"17696","LINC01394",0.0534622507802646,-0.0533240139618838,3.352475197  
53738,-0.015905863822961,0.987309491940711,NA  
"17697","AL034346.1",0.220644641439539,0.945449760607245,2.90117912387  
055,0.325884655941509,0.744511625317288,NA  
"17698","AL031768.2",0.284240190223044,0.69583062743856,3.337471494297  
51,0.208490358233014,0.834846110249776,NA  
"17699","AL031768.1",0.920699587038652,0.991523610005126,1.55072153085  
255,0.639395010824418,0.522565993818934,NA  
"17700","LINC01600",0.738938665687311,1.28617389824571,1.9598019158897  
1,0.656277498158182,0.511645592923851,NA  
"17701","MYLK4",2.18636231768581,-0.317497536603914,1.07742722896417,-  
0.294681188732488,0.768237434623175,NA  
"17702","AL133351.1",1.88329611085374,-0.118215713066027,1.07006921192  
313,-0.110474828869778,0.912032811314614,NA  
"17703","AL031963.2",0.117958369419058,0.451348601316665,3.34428110054  
629,0.134961322851401,0.892642454377335,NA  
"17704","AL031963.1",0.0644961186387932,-0.0533240139618838,3.35247519  
753738,-0.015905863822961,0.987309491940711,NA  
"17705","AL445309.1",0.730196633874527,2.48032194317496,1.702962923158  
7,1.45647442433708,0.145261514758551,NA  
"17706","AL033523.1",1.22643994892038,0.325616476681494,1.287604091989  
85,0.252885555977296,0.800356651435938,NA  
"17707","AL138831.2",0,NA,NA,NA,NA,NA

"17708", "AL136309.2", 0.166727055861678, -0.774663427007578, 3.35247519753738, -0.231072082972193, 0.817258802814835, NA  
"17709", "AL159166.1", 0.0644961186387932, -0.0533240139618838, 3.35247519753738, -0.015905863822961, 0.987309491940711, NA  
"17710", "AL034376.1", 2.13543216590006, -0.587615432866, 0.972458000498431, -0.604257903749899, 0.545672189166985, NA  
"17711", "AL359643.2", 0.901445068334737, 1.02532034263413, 1.60381654357524, 0.639300265819976, 0.522627615579545, NA  
"17712", "AL022097.1", 0.100823152638361, -1.35173207482145, 3.35247519753738, -0.40320419844251, 0.686798011343181, NA  
"17713", "LY86-AS1", 0.370211542879096, -2.53866757706578, 2.85090778608902, -0.890476917371089, 0.373209857351095, NA  
"17714", "AL031123.2", 0, NA, NA, NA, NA, NA  
"17715", "AL031123.1", 1.29528762057839, 0.877429874007583, 1.39458980617549, 0.629166992417533, 0.529239735702787, NA  
"17716", "AL031123.5", 0.50364116195323, 1.93465215488478, 2.3507559798539, 0.822991485064741, 0.410512835626712, NA  
"17717", "AL355336.1", 1.09719098729493, 2.20324272927026, 1.80537237348269, 1.22038132500059, 0.222320353428922, NA  
"17718", "CAGE1", 0.349636878717125, 1.50925859913206, 2.52125645060148, 0.598613678815576, 0.549430532214806, NA  
"17719", "DSP", 0.100823152638361, -1.35173207482145, 3.35247519753738, -0.40320419844251, 0.686798011343181, NA  
"17720", "BMP6", 2.20303069611731, 0.588384307625165, 1.27950399489751, 0.459853435371489, 0.645621425291081, NA  
"17721", "AL355499.1", 0.3088471509732, -0.151783800255383, 2.666328088474, -0.0569261528284959, 0.954604021144224, NA  
"17722", "TFAP2A", 2.15779327767113, 0.917165016489072, 1.13632263547092, 0.80713433655132, 0.419589091557445, NA  
"17723", "TFAP2A-AS2", 0.806429344156799, 1.54258640775903, 1.69625007189029, 0.909409781801797, 0.363133860333209, NA  
"17724", "TFAP2A-AS1", 0, NA, NA, NA, NA, NA  
"17725", "GCNT2", 0.346581969557291, -1.38612727586565, 2.96955222737921, -0.466779894654011, 0.640657361748092, NA  
"17726", "AL358777.1", 0.11921983002294, -0.0533240139618846, 3.35247519753738, -0.0159058638229612, 0.987309491940711, NA  
"17727", "AL024498.1", 0.694811063689893, 0.59516685010679, 1.6593125980457, 0.358682776715951, 0.719832414382036, NA  
"17728", "GCM2", 0, NA, NA, NA, NA, NA  
"17729", "ELOVL2-AS1", 0.102230937222884, -1.35173207482145, 3.35247519753738, -0.403204198442509, 0.686798011343181, NA  
"17730", "ERVFRD-1", 0.221906102043421, 0.695830468846429, 3.33747149841039, 0.208490310457437, 0.834846147549618, NA  
"17731", "AL022098.1", 0.568808984502817, -0.693374176611229, 2.31633177077906, -0.29934147834877, 0.764679509473781, NA  
"17732", "AL022724.3", 0, NA, NA, NA, NA, NA  
"17733", "AL157373.2", 0.156148522800746, 0.494635591052761, 3.34300496985

029,0.147961368742719,0.882373255878367,NA  
"17734","AL008729.1",1.29245333639776,0.533598480983777,1.241975049057  
31,0.429637037707635,0.667459690434477,NA  
"17735","AL008729.2",0.698758073307515,-0.0537711058670511,1.890695101  
21749,-0.0284398609973792,0.977311332569561,NA  
"17736","AL441883.1",2.30480356299442,-1.16212217877988,1.053307341356  
33,-1.10330777461726,0.269893531495676,NA  
"17737","Z93020.1",0,NA,NA,NA,NA,NA  
"17738","AL023583.1",1.71022896603991,0.0950406156647498,1.10721004941  
561,0.0858379272432658,0.931595256149875,NA  
"17739","AL133259.1",0,NA,NA,NA,NA,NA  
"17740","AL138720.1",0,NA,NA,NA,NA,NA  
"17741","AL136162.1",0.55765373030507,0.842797879039393,2.068994158041  
61,0.40734666928066,0.683753390450694,NA  
"17742","JARID2-  
AS1",0.302935778684673,1.24376146070571,3.12847474347089,0.39756161154  
9346,0.690953362451962,NA  
"17743","AL021978.1",0.205372544040962,0.695830627438559,3.33747149429  
751,0.208490358233014,0.834846110249776,NA  
"17744","AL137003.1",0.469087579333352,0.745651398935787,2.13835514580  
714,0.348703254647784,0.727312100605694,NA  
"17745","AL138824.1",1.818145945384,0.215421578186883,1.08225338161615  
,0.199049115342278,0.842224324725347,NA  
"17746","AL132775.1",0.324258425605524,-1.51835431877218,2.60721371952  
818,-0.582366649653467,0.560319740552027,NA  
"17747","E2F3-  
IT1",0.83740428449354,1.74091385646092,1.78729469555343,0.974049696892  
232,0.330031864266911,NA  
"17748","LINC00581",0.102686272020481,-0.0533240139618846,3.3524751975  
3738,-0.0159058638229612,0.987309491940711,NA  
"17749","AL512380.1",0.11921983002294,-0.0533240139618846,3.3524751975  
3738,-0.0159058638229612,0.987309491940711,NA  
"17750","AL512380.2",0.413102621914055,0.145915653234592,2.87453707172  
9,0.0507614442233737,0.959515614299126,NA  
"17751","NBAT1",0.11921983002294,-0.0533240139618846,3.35247519753738,  
-0.0159058638229612,0.987309491940711,NA  
"17752","PRL",0.102686272020481,-0.0533240139618846,3.35247519753738,-  
0.0159058638229612,0.987309491940711,NA  
"17753","KIAA0319",0.582053473337716,1.07319383484141,2.34946581528254  
,0.456782059930653,0.647827701774742,NA  
"17754","AL031775.2",0.82204394713139,-1.09636585526702,1.826151415664  
29,-0.600369633023123,0.548259921185846,NA  
"17755","LINC02828",0.165319271277154,-0.774663427007578,3.35247519753  
738,-0.231072082972193,0.817258802814835,NA  
"17756","ARMH2",0,NA,NA,NA,NA,NA  
"17757","AL022170.1",0,NA,NA,NA,NA,NA  
"17758","SLC17A3",0.102230937222884,-1.35173207482145,3.35247519753738  
, -0.403204198442509,0.686798011343181,NA  
"17759","U91328.3",0.310685332713897,-0.774666839538346,3.045396248280  
73,-0.254373085267864,0.799207342088715,NA

"17760", "HIST1H4A", 1.84181662723418, -1.92053033953499, 1.2055863073623, -1.59302600552665, 0.111154357223212, NA  
"17761", "HIST1H4B", 0.165319271277154, -0.774663427007578, 3.35247519753738, -0.231072082972193, 0.817258802814835, NA  
"17762", "HIST1H3B", 0.23843966004588, 0.69583062743856, 3.33747149429751, 0.208490358233014, 0.834846110249776, NA  
"17763", "HIST1H2AB", 0.534845158576027, 0.940608901924797, 2.10646869964086, 0.446533528879477, 0.655211898695153, NA  
"17764", "HIST1H2BB", 0.525929668523668, -0.828245463482593, 1.87394779584579, -0.441978941632561, 0.658504444490537, NA  
"17765", "HIST1H3C", 0, NA, NA, NA, NA, NA  
"17766", "AL353759.1", 0.244806367132003, 0.695807100884759, 3.33664907448574, 0.208534696143316, 0.834811494458112, NA  
"17767", "HIST1H2BE", 0.42229094671626, -0.383207947077129, 2.19098228634314, -0.174902348351124, 0.861156365001628, NA  
"17768", "HIST1H4D", 0.85533259152425, -0.66932141987881, 1.87994650424961, -0.356032162811979, 0.721816478818609, NA  
"17769", "HIST1H3D", 2.25948799062217, -0.631198802449606, 1.04807548004347, -0.602245558138072, 0.547010694043623, NA  
"17770", "HIST1H2AD", 0, NA, NA, NA, NA, NA  
"17771", "HIST1H2BF", 0.102686272020481, -0.0533240139618846, 3.35247519753738, -0.0159058638229612, 0.987309491940711, NA  
"17772", "HIST1H2BG", 0.626266692144693, 2.27804784355191, 1.90177004751468, 1.19785662127184, 0.230972839768083, NA  
"17773", "HIST1H2AE", 0.527853137234928, 2.06972657766601, 2.63737927009839, 0.784766378173889, 0.432590556346622, NA  
"17774", "HIST1H3E", 0.168565237602375, -1.35173207482145, 3.35247519753738, -0.40320419844251, 0.686798011343181, NA  
"17775", "HIST1H4F", 0.0644961186387932, -0.0533240139618838, 3.35247519753738, -0.015905863822961, 0.987309491940711, NA  
"17776", "HIST1H3F", 0, NA, NA, NA, NA, NA  
"17777", "HIST1H2BH", 0.168565237602375, -1.35173207482145, 3.35247519753738, -0.40320419844251, 0.686798011343181, NA  
"17778", "HIST1H3G", 0, NA, NA, NA, NA, NA  
"17779", "HIST1H2BI", 0.337572635416734, -0.264596406747081, 2.5942306538205, -0.101994171704591, 0.918761301265062, NA  
"17780", "AL513548.3", 0, NA, NA, NA, NA, NA  
"17781", "AL513548.4", 1.58448526737922, 1.41624142538572, 1.40763554296249, 1.00611371492163, 0.314360872011669, NA  
"17782", "AL133255.1", 0, NA, NA, NA, NA, NA  
"17783", "AL021807.1", 1.43876416214956, 1.14216180296754, 1.36308087225309, 0.837926660271899, 0.402071894500521, NA  
"17784", "HIST1H2AG", 1.87323179599573, 1.60526545518268, 1.24109275102596, 1.29342908002296, 0.19586269785188, NA  
"17785", "HIST1H4I", 0.203509424658842, -0.774663427007579, 3.35247519753738, -0.231072082972194, 0.817258802814834, NA  
"17786", "HIST1H2AH", 1.03362022206909, -0.69617112087176, 1.40555874418457, -0.495298488058314, 0.620389438025173, NA  
"17787", "PRSS16", 0, NA, NA, NA, NA, NA  
"17788", "AL021918.4", 0, NA, NA, NA, NA, NA

"17789", "AL021918.5", 0.857611252984382, 0.834016047886343, 1.56212768931  
022, 0.533897487121948, 0.593412460733196, NA  
"17790", "AL009179.1", 0.0644961186387932, -0.0533240139618838, 3.35247519  
753738, -0.015905863822961, 0.987309491940711, NA  
"17791", "AL009179.2", 0.362764736551061, 1.46681914601225, 2.230954469815  
39, 0.657485020809783, 0.510869099430787, NA  
"17792", "HIST1H2BL", 0.100823152638361, -1.35173207482145, 3.352475197537  
38, -0.40320419844251, 0.686798011343181, NA  
"17793", "HIST1H2AI", 0, NA, NA, NA, NA, NA  
"17794", "HIST1H3H", 1.67480762064286, 0.00633187099344672, 1.116573740112  
71, 0.00567080414483648, 0.995475377175996, NA  
"17795", "HIST1H2AJ", 0.302935778684673, 1.24376146070571, 3.1284747434708  
9, 0.397561611549346, 0.690953362451962, NA  
"17796", "HIST1H2BM", 0, NA, NA, NA, NA, NA  
"17797", "HIST1H2AK", 0.618569934160264, -0.741493427991592, 1.82028544483  
671, -0.407350083523911, 0.683750883171521, NA  
"17798", "HIST1H2AL", 0.456792465439674, 0.232272542728813, 2.141197540016  
78, 0.108477867355944, 0.913616636191954, NA  
"17799", "HIST1H1B", 0.612940988240419, 0.934466786351052, 1.8173830293353  
3, 0.514182630335672, 0.607124310582695, NA  
"17800", "HIST1H3I", 0.0534622507802646, -0.0533240139618838, 3.3524751975  
3738, -0.015905863822961, 0.987309491940711, NA  
"17801", "HIST1H2AM", 0, NA, NA, NA, NA, NA  
"17802", "HIST1H2B0", 0, NA, NA, NA, NA, NA  
"17803", "AL358933.1", 0.610391448898683, 0.473857285822382, 1.97341900821  
489, 0.240119956202825, 0.81023726390864, NA  
"17804", "ZSCAN23", 1.87543378315601, 1.29180231285202, 1.19793674335844, 1  
.07835603174707, 0.280874900689259, NA  
"17805", "Z98745.2", 0.205372544040962, 0.695830627438559, 3.3374714942975  
1, 0.208490358233014, 0.834846110249776, NA  
"17806", "HCG14", 0.155693188003149, -0.774663427007578, 3.35247519753738,  
-0.231072082972193, 0.817258802814835, NA  
"17807", "LINC01556", 0.582677699057054, 0.346541469999077, 2.011899863988  
04, 0.172245883705243, 0.863244226913327, NA  
"17808", "LINC02829", 0.11921983002294, -0.0533240139618846, 3.35247519753  
738, -0.0159058638229612, 0.987309491940711, NA  
"17809", "UBD", 0.168565237602375, -1.35173207482145, 3.35247519753738, -0.  
40320419844251, 0.686798011343181, NA  
"17810", "AL645939.4", 0.816821525240457, -0.181628619703887, 1.5837980414  
5183, -0.114679154128384, 0.908699437497022, NA  
"17811", "HLA-  
G", 0.100823152638361, -1.35173207482145, 3.35247519753738, -0.40320419844  
251, 0.686798011343181, NA  
"17812", "AL645929.2", 0.0534622507802646, -0.0533240139618838, 3.35247519  
753738, -0.015905863822961, 0.987309491940711, NA  
"17813", "HCG9", 0.275368352823686, 1.11865680170283, 2.73977894622596, 0.4  
08301846119294, 0.683052084109357, NA  
"17814", "HCG17", 1.58754712385849, 1.94863374288317, 1.57528866740038, 1.2  
3700105460602, 0.216086691103851, NA  
"17815", "AL662873.1", 0, NA, NA, NA, NA, NA

"17816", "MDC1-AS1", 0, NA, NA, NA, NA, NA  
"17817", "HCG20", 0.648006561636105, 0.0549990152516365, 1.80381523976778, 0.0304903817414897, 0.975675964074766, NA  
"17818", "LINC00243", 0.595350436662126, -1.47909214852751, 1.83650127489048, -0.805385854477947, 0.420597052031731, NA  
"17819", "CDSN", 0, NA, NA, NA, NA, NA  
"17820", "PSORS1C3", 0.928249829073722, -1.08860957757497, 1.66809813034826, -0.652605238126905, 0.514010807762813, NA  
"17821", "AL645933.3", 0.352281186264108, -0.153285691053076, 2.56347680645525, -0.0597960124574085, 0.952318101493915, NA  
"17822", "LTA", 0.363570862357347, -0.0560033712720379, 2.58878289356983, -0.0216330892061835, 0.982740638333437, NA  
"17823", "NCR3", 1.77543893787296, -0.967697723099938, 1.15884051676468, -0.835056859939292, 0.403685694697966, NA  
"17824", "C6orf47-AS1", 0.347037304354888, -0.0545756175730095, 2.6140053044848, -0.0208781586936244, 0.983342849664216, NA  
"17825", "MPIG6B", 0.205372544040962, 0.695830627438559, 3.33747149429751, 0.208490358233014, 0.834846110249776, NA  
"17826", "LY6G6C", 0.913008717863602, -0.230001257342872, 1.66307915361517, -0.138298442887039, 0.89000455608213, NA  
"17827", "SAPCD1-AS1", 0.102686272020481, -0.0533240139618846, 3.35247519753738, -0.0159058638229612, 0.987309491940711, NA  
"17828", "VWA7", 0, NA, NA, NA, NA, NA  
"17829", "SLC44A4", 1.59224672349359, -0.00343220394404941, 1.24853214652734, -0.00274899124831966, 0.997806625087722, NA  
"17830", "ZBTB12", 0.958580729603385, 0.382184369850537, 1.60742859733887, 0.237761335391974, 0.812066208654111, NA  
"17831", "C2-AS1", 0, NA, NA, NA, NA, NA  
"17832", "C4A", 0.205372544040962, 0.695830627438559, 3.33747149429751, 0.208490358233014, 0.834846110249776, NA  
"17833", "C4B", 0.308058816061443, 1.2759273050851, 3.31959886931736, 0.384361892901681, 0.700710240394097, NA  
"17834", "PRRT1", 1.99367672659061, -0.152930979011848, 1.15717404399152, -0.132159012558156, 0.894858519926703, NA  
"17835", "AL662884.1", 1.0527560549731, 0.474702018625854, 1.43399851500233, 0.331033828598547, 0.740618933206766, NA  
"17836", "HLA-DQB2", 0.0644961186387932, -0.0533240139618838, 3.35247519753738, -0.015905863822961, 0.987309491940711, NA  
"17837", "AL645941.3", 0.100823152638361, -1.35173207482145, 3.35247519753738, -0.40320419844251, 0.686798011343181, NA  
"17838", "COL11A2", 0.525929668523668, -0.828245463482593, 1.87394779584579, -0.441978941632561, 0.658504444490537, NA  
"17839", "AL645940.1", 1.78886406113616, 1.018287063895, 1.14636229939095, 0.888276825254987, 0.374391862442036, NA  
"17840", "SYNGAP1-AS1", 0.425106515885308, -0.392535333192574, 2.18741901849972, -0.179451367055317, 0.857583300851442, NA

"17841", "LINC00336", 0, NA, NA, NA, NA, NA  
"17842", "IP6K3", 0, NA, NA, NA, NA, NA  
"17843", "AL138889.3", 0.102230937222884, -1.35173207482145, 3.35247519753738, -0.403204198442509, 0.686798011343181, NA  
"17844", "PACSIN1", 0.380559755157402, 1.49425147940121, 2.95269759084475, 0.506063162050306, 0.612812310059885, NA  
"17845", "SPDEF", 0.221906102043421, 0.695830468846429, 3.33747149841039, 0.208490310457437, 0.834846147549618, NA  
"17846", "AL591002.1", 0, NA, NA, NA, NA, NA  
"17847", "TCP11", 1.39817762893322, -1.06557612119838, 1.18640080670691, -0.898158628327382, 0.369100986252802, NA  
"17848", "SCUBE3", 0.851190671652657, -0.38163579568934, 1.54016972534715, -0.247788142701818, 0.804298329643618, NA  
"17849", "Z97832.2", 1.91648007242835, 0.232244547408414, 1.08766387999163, 0.213526027369964, 0.830916690284114, NA  
"17850", "TULP1", 0.748291105364686, 0.711390399588346, 1.65789309056794, 0.429093048059357, 0.667855511274639, NA  
"17851", "AL033519.4", 0, NA, NA, NA, NA, NA  
"17852", "AL033519.5", 1.23406888098978, 2.17815276044967, 1.64073380286567, 1.32754792803401, 0.184327496593872, NA  
"17853", "ARMC12", 1.70228943537704, -0.165317508815304, 1.05955358141028, -0.156025624107905, 0.876012823449881, NA  
"17854", "SLC26A8", 0.579700930120888, 0.187878410145835, 2.05623975012152, 0.0913698950400759, 0.927198681943308, NA  
"17855", "PNPLA1", 0, NA, NA, NA, NA, NA  
"17856", "Z84484.1", 0.59720893973533, -0.690866195866549, 2.04592679151271, -0.337678844977506, 0.735605218542869, NA  
"17857", "PXT1", 0.220042982661301, -0.774663427007579, 3.35247519753738, -0.231072082972194, 0.817258802814834, NA  
"17858", "RAB44", 0.557578013972068, -2.41972814297175, 2.59308065599079, -0.933148044346967, 0.35074353593156, NA  
"17859", "CPNE5", 0.221906102043421, 0.695830468846429, 3.33747149841039, 0.208490310457437, 0.834846147549618, NA  
"17860", "Z85996.3", 0.0644961186387932, -0.0533240139618838, 3.35247519753738, -0.015905863822961, 0.987309491940711, NA  
"17861", "AL096712.2", 0.306195696679323, -0.0320258052725539, 3.12823849898919, -0.0102376482109348, 0.991831681239967, NA  
"17862", "AL353597.1", 0.219614265997676, -1.35173207482145, 3.35247519753738, -0.40320419844251, 0.686798011343181, NA  
"17863", "AL121574.1", 0.117958369419058, 0.451348601316665, 3.34428110054629, 0.134961322851401, 0.892642454377335, NA  
"17864", "BTBD9-AS1", 0, NA, NA, NA, NA, NA  
"17865", "DNAH8", 0.102686272020481, -0.0533240139618846, 3.35247519753738, -0.0159058638229612, 0.987309491940711, NA  
"17866", "KCNK17", 0.102230937222884, -1.35173207482145, 3.35247519753738, -0.403204198442509, 0.686798011343181, NA  
"17867", "KIF6", 1.10151303275393, -0.103370423211461, 1.36312007458568, -0.0758336885639957, 0.939551413685131, NA  
"17868", "AL590999.1", 1.00180519502088, 1.21151763761355, 1.88260110179531, 0.643533904478333, 0.519877722322116, NA



"17869", "LINC00951", 0, NA, NA, NA, NA, NA  
"17870", "LRFN2", 0, NA, NA, NA, NA, NA  
"17871", "AL033380.1", 0, NA, NA, NA, NA, NA  
"17872", "APOBEC2", 0, NA, NA, NA, NA, NA  
"17873", "TREML2", 0.244806367132003, 0.695807100884759, 3.33664907448574, 0.208534696143316, 0.834811494458112, NA  
"17874", "PRICKLE4", 1.88487214530055, -2.59948304376976, 1.28475099317176, -2.02333608425725, 0.0430385090071163, NA  
"17875", "PTCRA", 0.219614265997676, -1.35173207482145, 3.35247519753738, -0.40320419844251, 0.686798011343181, NA  
"17876", "AL035587.1", 0.978227881619852, -0.209357850166686, 1.42677458347073, -0.146735057234765, 0.883341146422977, NA  
"17877", "GNMT", 1.48202090797969, 1.13631090386782, 1.31329364628035, 0.865237494360992, 0.386908449975331, NA  
"17878", "AL136304.1", 0.885083696071391, 2.80516461344892, 1.5795826894935, 1.7758896904273, 0.0757511005498745, NA  
"17879", "AL355385.1", 0.687573479728161, -1.06653947310523, 1.95663409077036, -0.545088873865689, 0.585692394500022, NA  
"17880", "AL359813.1", 0, NA, NA, NA, NA, NA  
"17881", "DLK2", 0.752205700754994, -0.304451969512569, 1.86289165624372, -0.163429777836065, 0.870180058738127, NA  
"17882", "LRRC73", 1.5366230410559, -0.905872304255833, 1.19529576493304, -0.757864564429859, 0.448532065788456, NA  
"17883", "AL355802.3", 0.504755026076008, 0.547196022655033, 2.07770002325755, 0.263366230220812, 0.792268316436718, NA  
"17884", "POLH-AS1", 0.156148522800746, 0.494635591052761, 3.34300496985029, 0.147961368742719, 0.882373255878367, NA  
"17885", "AL136131.2", 0, NA, NA, NA, NA, NA  
"17886", "AL136131.3", 0.791426229578545, 1.48602824328329, 1.78387177895, 0.833035345263427, 0.404824795538548, NA  
"17887", "AL109615.3", 0.26007846453058, 0.946467962785628, 2.75713405316427, 0.343279631869694, 0.731388102297512, NA  
"17888", "C6orf223", 0.219614265997676, -1.35173207482145, 3.35247519753738, -0.40320419844251, 0.686798011343181, NA  
"17889", "CAPN11", 0.878666189585373, 0.0632847334880445, 1.45661126750854, 0.0434465494670309, 0.965345571601456, NA  
"17890", "TCTE1", 0.979325227348563, -0.306089118108561, 1.50190233771309, -0.203800946587936, 0.838509053096421, NA  
"17891", "AL096865.1", 1.34301110638205, -1.54640660127771, 1.30696823394903, -1.18320136718642, 0.236729351280225, NA  
"17892", "CLIC5", 0.647681032425083, 0.397531780524425, 2.00046036054075, 0.198720148804632, 0.842481661885137, NA  
"17893", "AL035701.1", 0.11921983002294, -0.0533240139618846, 3.35247519753738, -0.0159058638229612, 0.987309491940711, NA  
"17894", "ANKRD66", 0.156148522800746, 0.494635591052761, 3.34300496985029, 0.147961368742719, 0.882373255878367, NA  
"17895", "ADGRF5", 0.648256287638082, 0.402635894886944, 1.80912270306322, 0.22255864359294, 0.823879026750891, NA  
"17896", "ADGRF1", 0, NA, NA, NA, NA, NA

"17897", "PTCHD4", 0.880906503541422, 0.0439020871515976, 1.66443404810483, 0.0263765856037286, 0.978956969632861, NA  
"17898", "AL353138.1", 0.106924501560529, 0.385965786494404, 3.34626872025989, 0.115342137395477, 0.908173940404949, NA  
"17899", "C6orf141", 0, NA, NA, NA, NA, NA  
"17900", "RHAG", 0, NA, NA, NA, NA, NA  
"17901", "AL132799.1", 0.142120095111522, -0.0533240139618842, 3.35247519753738, -0.0159058638229611, 0.987309491940711, NA  
"17902", "IL17A", 0.106924501560529, 0.385965786494404, 3.34626872025989, 0.115342137395477, 0.908173940404949, NA  
"17903", "IL17F", 0.0534622507802646, -0.0533240139618838, 3.35247519753738, -0.015905863822961, 0.987309491940711, NA  
"17904", "AL034374.1", 1.39074642108147, -0.313014825171372, 1.21247322615446, -0.25816225745796, 0.796281684990414, NA  
"17905", "AL033397.2", 0.142120095111522, -0.0533240139618842, 3.35247519753738, -0.0159058638229611, 0.987309491940711, NA  
"17906", "AL590652.1", 1.01947956511908, -1.34079523147641, 1.49185008213005, -0.89874662845615, 0.368787634224773, NA  
"17907", "AL033384.1", 0.204461874445769, -1.96013641505178, 3.33548947920397, -0.587660799793491, 0.556759992345141, NA  
"17908", "GFRAL", 0.102686272020481, -0.0533240139618846, 3.35247519753738, -0.0159058638229612, 0.987309491940711, NA  
"17909", "AL021368.5", 1.00704028337635, 0.851608842221638, 1.72448940811817, 0.493832457429209, 0.621424508558477, NA  
"17910", "AL021368.1", 1.71031150232101, 1.24366702426474, 1.2627804370648, 0.984864025258036, 0.324690866233168, NA  
"17911", "KHDRBS2", 0.476624053663818, 0.544431635961036, 2.79390331386159, 0.19486416486208, 0.845499288664445, NA  
"17912", "AL135905.1", 1.58403928308341, -0.719024223851719, 1.26598558857848, -0.56795608918351, 0.57006478467221, NA  
"17913", "EYS", 1.39609886312771, -0.535444849736732, 1.51944527307876, -0.352394955727357, 0.724542084427453, NA  
"17914", "AL646090.1", 0.337702441003309, 1.18347174827738, 3.03521762941542, 0.389913308623381, 0.69660065241546, NA  
"17915", "AL391807.1", 0.853053576466046, 0.935843749465406, 1.70496710702985, 0.548892553766447, 0.583079188558954, NA  
"17916", "ADGRB3", 0, NA, NA, NA, NA, NA  
"17917", "COL19A1", 0.221450767245824, -0.774663427007578, 3.35247519753738, -0.231072082972194, 0.817258802814834, NA  
"17918", "COL9A1", 0, NA, NA, NA, NA, NA  
"17919", "AL365226.2", 0, NA, NA, NA, NA, NA  
"17920", "AL583856.2", 1.90871111317978, -0.856696766202748, 1.053220181127, -0.813407093363934, 0.415984693762744, NA  
"17921", "AL589935.1", 1.54259819390658, 0.901674190289036, 1.54212672914517, 0.584695260932836, 0.558752641170461, NA  
"17922", "RIMS1", 0.206616213750315, 0.576034718369261, 3.3406888072366, 0.172429924368129, 0.863099548245903, NA  
"17923", "KCNQ5", 0, NA, NA, NA, NA, NA  
"17924", "KCNQ5-IT1", 0, NA, NA, NA, NA, NA  
"17925", "KCNQ5-AS1", 0, NA, NA, NA, NA, NA

"17926","00EP",0.168565237602375,-1.35173207482145,3.35247519753738,-0.40320419844251,0.686798011343181,NA  
"17927","AL603910.1",1.70886881329354,1.68922566471287,1.29279487343058,1.30664632064197,0.191332857283689,NA  
"17928","AL356277.3",0.756886598628096,0.0220703352413625,1.9088498020816,0.0115621120201782,0.990774974866587,NA  
"17929","IMPG1",1.13355632694488,1.14266091334033,1.54949279767577,0.737441900378184,0.460853662738277,NA  
"17930","LINC02540",0,NA,NA,NA,NA,NA  
"17931","AL450327.1",0.102686272020481,-0.0533240139618846,3.35247519753738,-0.0159058638229612,0.987309491940711,NA  
"17932","LCAL1",0,NA,NA,NA,NA,NA  
"17933","AL391840.1",0.102230937222884,-1.35173207482145,3.35247519753738,-0.403204198442509,0.686798011343181,NA  
"17934","TTK",0.614132178057329,-1.5692225036616,1.97398400145989,-0.794951986693437,0.426641431929413,NA  
"17935","AL359715.3",1.4378701972344,2.63147481807067,1.4007438302537,1.87862674190331,0.0602954770737764,NA  
"17936","AL359715.2",1.5170817053288,1.75135221267771,1.36680230121392,1.28135006146994,0.200070736390497,NA  
"17937","AL078599.2",0.204917209243366,-0.774663427007578,3.35247519753738,-0.231072082972194,0.817258802814834,NA  
"17938","LINC02542",0.810975984552998,-0.688279397705792,1.9301722462754,-0.356589625114518,0.721399045509965,NA  
"17939","PRSS35",0.594933214091565,-1.29686904834543,2.02614868007651,-0.64006608256234,0.522129638399571,NA  
"17940","RIPPLY2",0.403460020245984,1.56382911394003,2.91211969440415,0.537007155627923,0.591262671305975,NA  
"17941","LINC01611",0.390471339645796,-0.0601964608967816,2.51831605211681,-0.0239034575688713,0.980929616330929,NA  
"17942","AL035694.1",0.967299096275208,-0.793660209640709,1.54556777834724,-0.513507217709607,0.607596563239578,NA  
"17943","LINC02535",0.65216151706397,2.36240642935603,1.89090300102623,1.2493535776684,0.211535779640841,NA  
"17944","GJB7",0.811244101410308,2.63148631802783,2.06615895297799,1.27361271708308,0.202800703059619,NA  
"17945","CFAP206",0.921410730070958,1.96815581166725,1.51502698136004,1.29908961086649,0.193913178050237,NA  
"17946","CNR1",0,NA,NA,NA,NA,NA  
"17947","AL353135.1",1.67587231337721,2.10289257518495,1.41371056471042,1.48749866321873,0.136883156017562,NA  
"17948","GABRR2",0.914589444562739,-0.0103285980403629,1.655589422063,-0.00623862287516468,0.995022331416077,NA  
"17949","AL158136.1",0.102686272020481,-0.0533240139618846,3.35247519753738,-0.0159058638229612,0.987309491940711,NA  
"17950","AL132996.1",0.968404166844242,-2.38448512150286,1.62879252059199,-1.46395878625241,0.143205209541282,NA  
"17951","EPHA7",1.59290601082143,3.63116024266368,3.24532287794355,1.11889028587646,0.263186947666799,NA  
"17952","FHL5",0.168565237602375,-1.35173207482145,3.35247519753738,-0

.40320419844251,0.686798011343181,NA  
"17953","GPR63",0.639515936317848,1.09397138273811,1.82470152800442,0.  
599534425739493,0.548816560426856,NA  
"17954","KLHL32",0.11921983002294,-0.0533240139618846,3.35247519753738  
, -0.0159058638229612,0.987309491940711,NA  
"17955","PRDM13",0,NA,NA,NA,NA,NA  
"17956","GRIK2",2.1192363385861,0.482977977325675,1.24794865465898,0.3  
87017507108621,0.698743247174094,NA  
"17957","AL590608.1",0.160386752340794,0.715986771710925,3.33695183420  
161,0.214563112470645,0.830107956063492,NA  
"17958","BVES-  
AS1",2.12149615426018,-1.11152044224218,1.02178481423777,-1.0878224326  
238,0.27667350435374,NA  
"17959","AL133406.2",0.244806367132003,0.695807100884759,3.33664907448  
574,0.208534696143316,0.834811494458112,NA  
"17960","AL096794.1",0.336739891476476,0.362211857807171,2.57402307113  
885,0.140718186199829,0.888092577546038,NA  
"17961","AL022067.1",0.748694376265818,1.30548301610862,1.917455670156  
01,0.680841302580102,0.49597191245599,NA  
"17962","LINC02526",0.11921983002294,-0.0533240139618846,3.35247519753  
738,-0.0159058638229612,0.987309491940711,NA  
"17963","Z98200.1",0.219614265997676,-1.35173207482145,3.3524751975373  
8,-0.40320419844251,0.686798011343181,NA  
"17964","Z98742.4",0.0644961186387932,-0.0533240139618838,3.3524751975  
3738,-0.015905863822961,0.987309491940711,NA  
"17965","AL139106.1",0.100823152638361,-1.35173207482145,3.35247519753  
738,-0.40320419844251,0.686798011343181,NA  
"17966","LINC00222",0.142120095111522,-0.0533240139618842,3.3524751975  
3738,-0.0159058638229611,0.987309491940711,NA  
"17967","AL109947.1",1.10056079753573,0.00676423127775548,1.4568921460  
6591,0.00464291834918675,0.996295500441579,NA  
"17968","AL512303.1",0.155693188003149,-0.774663427007578,3.3524751975  
3738,-0.231072082972193,0.817258802814835,NA  
"17969","METTL24",0.438294723048383,1.76325634544046,2.40772808339573,  
0.732332009415971,0.463965946529121,NA  
"17970","SLC22A16",0.98355386024669,-1.57497242071615,1.7640876920110  
3,-0.89279712559,0.37196582594069,NA  
"17971","SLC16A10",0.862325604517898,-2.84619891171357,1.7718251721392  
7,-1.60636554693323,0.108193616206086,NA  
"17972","AL080317.1",1.82965872934524,0.416100774862438,1.156394594857  
46,0.359825942384077,0.71897730161861,NA  
"17973","REV3L-IT1",0,NA,NA,NA,NA,NA  
"17974","AL008730.1",0.935908982952184,-0.230178499264642,1.5505228346  
4939,-0.148452182786905,0.881985920340358,NA  
"17975","Z99289.1",1.93801696196091,0.349423878097921,1.15408552006056  
,0.302771217578039,0.762064219523131,NA  
"17976","Z99289.2",0.795087737981778,1.65071420629813,1.72484089795717  
,0.95702404103078,0.338555120724901,NA  
"17977","AL360015.1",1.57915061362654,3.57487681926792,1.5717785138018  
2,2.27441512139073,0.0229410391227877,NA

"17978", "LINC02541", 1.09255023008776, 3.06152191231123, 1.5603086122353, 1.96212588221589, 0.0497478303047407, NA  
"17979", "LINC01268", 0, NA, NA, NA, NA, NA  
"17980", "F0393415.1", 2.23599505348148, 4.12566346474591, 1.29653937953806, 3.18205796897261, 0.00146232546442948, NA  
"17981", "HDAC2-AS2", 2.15547119181338, 0.976483644576155, 1.07129921314036, 0.911494783715682, 0.362034732803855, NA  
"17982", "HS3ST5", 0.273076516777941, -0.774665331385065, 3.18476194606587, -0.243241204367569, 0.807818548712931, NA  
"17983", "AL590550.1", 0, NA, NA, NA, NA, NA  
"17984", "AL357141.1", 0.489911645341056, 0.845627865197899, 2.1316184669423, 0.396706952164338, 0.691583572902617, NA  
"17985", "COL10A1", 0.204917209243366, -0.774663427007578, 3.35247519753738, -0.231072082972194, 0.817258802814834, NA  
"17986", "RSPH4A", 0.894501833535152, 0.0824206040537553, 1.64936244849173, 0.0499711898552834, 0.960145346793441, NA  
"17987", "SLC35F1", 0, NA, NA, NA, NA, NA  
"17988", "PLN", 0.279606582363734, 1.19594067730093, 3.16985479259559, 0.377285634690431, 0.705961346602518, NA  
"17989", "AL137009.1", 2.1671331109297, -0.615892250045536, 1.08832146685725, -0.565910228550442, 0.571454807922915, NA  
"17990", "AL078600.1", 1.50851624990963, 0.4325741355081, 1.2178259518442, 0.3552019357553, 0.722438314639932, NA  
"17991", "AL096854.1", 0.168565237602375, -1.35173207482145, 3.35247519753738, -0.40320419844251, 0.686798011343181, NA  
"17992", "PKIB", 1.90107960168132, -0.454917275613336, 1.0847451763558, -0.419377090149072, 0.674940564631926, NA  
"17993", "AL512283.1", 0.100823152638361, -1.35173207482145, 3.35247519753738, -0.40320419844251, 0.686798011343181, NA  
"17994", "FABP7", 0, NA, NA, NA, NA, NA  
"17995", "TRDN", 0.604680683704788, -2.45191357632157, 1.94111799885944, -1.26314504206455, 0.206537059320097, NA  
"17996", "NKAIN2", 1.37176290751478, 0.944359311275756, 1.43065343338154, 0.660089501231361, 0.509196395628021, NA  
"17997", "HEY2", 0.659859729886532, -1.43946463557286, 1.99258915298299, -0.722409149632235, 0.470042963220009, NA  
"17998", "C6orf58", 0.961585389173985, 1.93015926176856, 1.61442850802293, 1.19556812344219, 0.23186513709421, NA  
"17999", "AL356124.2", 0.219614265997676, -1.35173207482145, 3.35247519753738, -0.40320419844251, 0.686798011343181, NA  
"18000", "TMEM244", 0.563809383049544, -1.08864432474671, 2.32994570959289, -0.467240210904711, 0.640328027495437, NA  
"18001", "AL355581.1", 0.347037304354888, -0.0545756175730095, 2.6140053044848, -0.0208781586936244, 0.983342849664216, NA  
"18002", "ARG1", 0, NA, NA, NA, NA, NA  
"18003", "ENPP3", 2.21756921383831, 0.559743275589142, 1.20226670216261, 0.465573299653304, 0.641520958478576, NA  
"18004", "VNN1", 0.816116464440883, -1.30851647277616, 1.58497099878143, -0.825577549230986, 0.409043774998055, NA

"18005","VNN3",0.156148522800746,0.494635591052761,3.34300496985029,0.147961368742719,0.882373255878367,NA  
"18006","VNN2",1.11899976323311,-1.62843600522463,1.33871610264542,-1.21641623792132,0.223826401406115,NA  
"18007","LINC00326",0,NA,NA,NA,NA,NA  
"18008","AL591115.1",0.520296106294908,0.694824966785459,2.0788710712393,0.334231870556188,0.738204596252423,NA  
"18009","TARID",0.534203147644912,2.05177261692325,2.26821648174965,0.904575305501949,0.365690422739683,NA  
"18010","AL450270.1",0.106924501560529,0.385965786494404,3.34626872025989,0.115342137395477,0.908173940404949,NA  
"18011","AL355881.1",1.63074655819653,-1.11950642208386,1.66558919476492,-0.672138379381033,0.501495605423087,NA  
"18012","LINC01010",0.765026971662641,-2.66591928239117,2.06822478245203,-1.28898913938674,0.19740186232464,NA  
"18013","Z84486.1",1.08762620618912,-1.83646586893886,1.76661573248862,-1.03953895301942,0.298554151681025,NA  
"18014","CT69",1.1529931809952,-1.4682543533272,1.59449909574067,-0.920824826586168,0.357141891002662,NA  
"18015","AL078590.2",0.557615618078035,-0.48532922706255,1.88814560501581,-0.257040148690485,0.797147779841651,NA  
"18016","ALDH8A1",1.29446446025307,0.600096841800472,1.32384193234015,0.45329946660602,0.650333116858751,NA  
"18017","MYB",0.102230937222884,-1.35173207482145,3.35247519753738,-0.403204198442509,0.686798011343181,NA  
"18018","AL049552.1",1.63998984277198,1.88986575435258,1.58096717331954,1.19538582852701,0.231936319938372,NA  
"18019","AL360178.2",0.206616213750315,0.576034718369261,3.3406888072366,0.172429924368129,0.863099548245903,NA  
"18020","AL138828.1",1.04655972327695,1.30844285118436,1.4666308486959,0.892141913111807,0.372316871951375,NA  
"18021","AL023284.4",0.221450767245824,-0.774663427007578,3.35247519753738,-0.231072082972194,0.817258802814834,NA  
"18022","AL024508.2",0.700337371967795,1.20297035760695,1.7479339636086,0.688224144991965,0.491311641317769,NA  
"18023","AL024508.1",0,NA,NA,NA,NA,NA  
"18024","AL356234.2",0.154285403418625,-0.774663427007578,3.35247519753738,-0.231072082972193,0.817258802814835,NA  
"18025","AL591468.2",0,NA,NA,NA,NA,NA  
"18026","ARFGEF3",0,NA,NA,NA,NA,NA  
"18027","GVQW2",1.05102442167011,0.101664292999323,1.52215994222401,0.0667894944408944,0.946749286956452,NA  
"18028","ECT2L",1.37368384578806,2.37782499264021,1.51541057583139,1.56909621099594,0.11662552253783,NA  
"18029","AL031772.1",0.616010173225927,-0.481564508876231,1.98872286051614,-0.242147620685192,0.808665779959531,NA  
"18030","AL592429.2",0,NA,NA,NA,NA,NA  
"18031","AL357146.1",0.597949796455631,0.421345704733669,2.2297050402036,0.188969256980822,0.850116912022573,NA  
"18032","AL035446.1",0.523491508497282,-2.97432464345697,2.19739711929

653,-1.35356718971633,0.175874500514454,NA  
"18033","ADGRG6",1.91186627281679,-1.871728131573,1.23201342486925,-1.51924329215133,0.128701267869329,NA  
"18034","AL023584.2",0.204917209243366,-0.774663427007578,3.35247519753738,-0.231072082972194,0.817258802814834,NA  
"18035","AL023581.2",2.03571553461327,-0.187157349757051,1.0313233919238,-0.181472999858883,0.855996324267878,NA  
"18036","PHACTR2-AS1",0,NA,NA,NA,NA,NA  
"18037","AL023806.2",0.96821651976649,1.06992133160688,1.68805173925515,0.633820224064327,0.526198153101945,NA  
"18038","AL023806.4",0.100823152638361,-1.35173207482145,3.35247519753738,-0.40320419844251,0.686798011343181,NA  
"18039","GRM1",0.339262812684241,-0.0349910483728248,3.04454514673679,-0.0114930298899752,0.990830090769536,NA  
"18040","ADGB",0.102686272020481,-0.0533240139618846,3.35247519753738,-0.0159058638229612,0.987309491940711,NA  
"18041","AL031056.1",0.100823152638361,-1.35173207482145,3.35247519753738,-0.40320419844251,0.686798011343181,NA  
"18042","RAET1E",1.91707404573472,1.59239877377236,1.2040487940473,1.32253674572411,0.185989481671948,NA  
"18043","ULBP1",0.4173584277799,0.678545480277549,2.46825583533512,0.274908893382772,0.7833862343782,NA  
"18044","ULBP3",2.16197810580265,-0.555444219167566,1.18972965473783,-0.466865911054359,0.640595815750991,NA  
"18045","PPP1R14C",1.14459948790622,-3.36214056069829,1.91179833856682,-1.75862720082638,0.078640849756844,NA  
"18046","AL450344.3",1.03738897480055,2.11701365447211,1.68181622579189,1.25876633963102,0.208114741703161,NA  
"18047","AL450344.1",0.204917209243366,-0.774663427007578,3.35247519753738,-0.231072082972194,0.817258802814834,NA  
"18048","AL450344.2",0,NA,NA,NA,NA,NA  
"18049","AL078582.2",0,NA,NA,NA,NA,NA  
"18050","NANOGP11",0,NA,NA,NA,NA,NA  
"18051","MYCT1",0.476130606639186,-2.03687176935627,2.08491118232905,-0.976958532632017,0.328589682038253,NA  
"18052","AL590867.1",0.594582423082876,1.02300191334684,2.02892957870539,0.50420769852426,0.614115431094682,NA  
"18053","OPRM1",0,NA,NA,NA,NA,NA  
"18054","AL357075.4",1.31766195592616,0.677253519908618,1.33714799678469,0.506491070201014,0.612511956908406,NA  
"18055","AL596202.1",2.15282910348392,-0.24293836468688,1.11052517305783,-0.21875988998786,0.826837093215906,NA  
"18056","CLDN20",0.23843966004588,0.69583062743856,3.33747149429751,0.208490358233014,0.834846110249776,NA  
"18057","AL355297.3",0.298268617912268,1.11711823327978,2.67902047659825,0.416987568045118,0.676687501005877,NA  
"18058","AL355297.4",2.13288005983369,-0.279442717092578,1.15387680352059,-0.242177255180079,0.808642818287906,NA  
"18059","AL049820.1",0.203509424658842,-0.774663427007579,3.35247519753738,-0.231072082972194,0.817258802814834,NA

"18060", "AL390955.2", 0.940184602029466, 1.97262313938885, 1.56083629813869, 1.26382449058957, 0.206293028810214, NA  
"18061", "AL117344.2", 0.87425429524091, 0.96291756478388, 1.60012617338038, 0.601776022918023, 0.547323237480479, NA  
"18062", "AL391863.2", 0, NA, NA, NA, NA, NA  
"18063", "AL035634.1", 0, NA, NA, NA, NA, NA  
"18064", "AL139330.1", 1.25419206228367, -2.01613521826167, 1.51158619577495, -1.33378779450155, 0.182273412192554, NA  
"18065", "AL360169.2", 0.102686272020481, -0.0533240139618846, 3.35247519753738, -0.0159058638229612, 0.987309491940711, NA  
"18066", "AL627422.2", 0.203509424658842, -0.774663427007579, 3.35247519753738, -0.231072082972194, 0.817258802814834, NA  
"18067", "C6orf99", 0.0644961186387932, -0.0533240139618838, 3.35247519753738, -0.015905863822961, 0.987309491940711, NA  
"18068", "AL356417.3", 0.155693188003149, -0.774663427007578, 3.35247519753738, -0.231072082972193, 0.817258802814835, NA  
"18069", "AL356417.1", 0, NA, NA, NA, NA, NA  
"18070", "FNDC1-IT1", 1.12555644695288, -0.448870556918246, 1.30515967021583, -0.343920033051601, 0.730906425648359, NA  
"18071", "AL078604.2", 0.838618999054298, -0.896800992404071, 1.85669201509866, -0.48301009812681, 0.629088566178306, NA  
"18072", "PNLDC1", 0.729414155541087, -2.06547211628725, 1.70360854541382, -1.21241004680775, 0.225355456972033, NA  
"18073", "MAS1", 0.482231955561354, -0.716923449980209, 2.4074308778667, -0.297796068236649, 0.765858815580531, NA  
"18074", "AIRN", 0.279606582363734, 1.19594067730093, 3.16985479259559, 0.377285634690431, 0.705961346602518, NA  
"18075", "SLC22A1", 1.50959183826309, -1.59031566256077, 1.24411669111539, -1.27826889062553, 0.20115463289319, NA  
"18076", "PLG", 0, NA, NA, NA, NA, NA  
"18077", "AL445307.1", 0.102686272020481, -0.0533240139618846, 3.35247519753738, -0.0159058638229612, 0.987309491940711, NA  
"18078", "AL078602.1", 0.100823152638361, -1.35173207482145, 3.35247519753738, -0.40320419844251, 0.686798011343181, NA  
"18079", "Z97205.2", 1.51722727293394, 2.73989084361783, 1.36168304526596, 2.0121355356104, 0.04420565163721, NA  
"18080", "TBXT", 0, NA, NA, NA, NA, NA  
"18081", "AL022069.1", 1.16626803447314, -0.715587430931493, 1.42037835583684, -0.503800573974454, 0.614401524318562, NA  
"18082", "RAMACL", 0.311386376006298, -0.943015833263308, 3.11477232797951, -0.302755942960051, 0.762075860929422, NA  
"18083", "CCR6", 1.93835027589648, 0.988816032562347, 1.25852366316099, 0.785695224894519, 0.432046061401398, NA  
"18084", "AL121935.1", 0.142120095111522, -0.0533240139618842, 3.35247519753738, -0.0159058638229611, 0.987309491940711, NA  
"18085", "AL121935.2", 0, NA, NA, NA, NA, NA  
"18086", "GPR31", 0, NA, NA, NA, NA, NA  
"18087", "AL356123.2", 1.47931586687055, 1.58545376219277, 1.40690704842782, 1.12690725656998, 0.259781694963027, NA



"18088", "LINC01558", 0, NA, NA, NA, NA, NA  
"18089", "KIF25-AS1", 0, NA, NA, NA, NA, NA  
"18090", "KIF25", 0.258834794821227, 1.09609913055011, 3.27112624850828, 0.335083102050849, 0.737562399373167, NA  
"18091", "AL606970.1", 0.142120095111522, -0.0533240139618842, 3.35247519753738, -0.0159058638229611, 0.987309491940711, NA  
"18092", "AL138918.1", 0.269868662679755, 1.13857476503723, 3.23247437146312, 0.352230098121977, 0.724665706448339, NA  
"18093", "AL513210.1", 0.865218884773149, 0.345343680658145, 1.66937216158365, 0.20687039631147, 0.83611107672107, NA  
"18094", "AL109924.2", 0.11921983002294, -0.0533240139618846, 3.35247519753738, -0.0159058638229612, 0.987309491940711, NA  
"18095", "AL136129.1", 0.0534622507802646, -0.0533240139618838, 3.35247519753738, -0.015905863822961, 0.987309491940711, NA  
"18096", "LINC02544", 0.604680683704788, -2.45191357632157, 1.94111799885944, -1.26314504206455, 0.206537059320097, NA  
"18097", "LINC02519", 0.718132390574136, 1.15370435213356, 1.80089948278427, 0.640626733008929, 0.521765226616607, NA  
"18098", "AL354892.2", 1.84286656647399, -1.71133440723156, 1.33794846056503, -1.27907349025152, 0.200871177872748, NA  
"18099", "AL354892.1", 0.156148522800746, 0.494635591052761, 3.34300496985029, 0.147961368742719, 0.882373255878367, NA  
"18100", "LINC00574", 2.34596801259463, 0.341958407028981, 1.12445502854466, 0.304110345321293, 0.761043825459344, NA  
"18101", "AL603783.1", 0, NA, NA, NA, NA, NA  
"18102", "AL596442.2", 0, NA, NA, NA, NA, NA  
"18103", "LINC01624", 0, NA, NA, NA, NA, NA  
"18104", "AL008628.1", 0.302935778684673, 1.24376146070571, 3.12847474347089, 0.397561611549346, 0.690953362451962, NA  
"18105", "AL031259.1", 0.309302485770796, 1.17088912763199, 2.66183894910263, 0.439879778611974, 0.660024182340411, NA  
"18106", "AL672310.1", 1.10506192766337, 0.27215931969551, 1.40159598491385, 0.194178153066155, 0.846036388618114, NA  
"18107", "AC215522.2", 0.203509424658842, -0.774663427007579, 3.35247519753738, -0.231072082972194, 0.817258802814834, NA  
"18108", "AC093627.7", 0, NA, NA, NA, NA, NA  
"18109", "AC147651.1", 0.206616213750315, 0.576034718369261, 3.3406888072366, 0.172429924368129, 0.863099548245903, NA  
"18110", "AC147651.4", 1.41780720462389, -2.0583218604242, 1.2470162562604, -1.65059745620059, 0.0988207986595824, NA  
"18111", "ELFN1", 0.624769995933239, -2.39379742700312, 2.17131553526991, -1.10246409981383, 0.270259957672988, NA  
"18112", "ELFN1-AS1", 0, NA, NA, NA, NA, NA  
"18113", "AC104129.1", 0, NA, NA, NA, NA, NA  
"18114", "AMZ1", 0.345174184972767, -1.38629500102082, 2.56076240199981, -0.541360260498282, 0.588259292553927, NA  
"18115", "CARD11", 1.81273549102324, 0.874414228931862, 1.16221307493688, 0.752369980848266, 0.451828594016709, NA  
"18116", "AC024028.1", 0.172682080803205, 0.494635591052761, 3.34300496985029, 0.147961368742719, 0.882373255878367, NA

"18117","AC073316.3",0.902878714677732,2.78958369093657,1.602888866579  
62,1.74034753693762,0.081798011651364,NA  
"18118","AC011284.1",0.11921983002294,-0.0533240139618846,3.3524751975  
3738,-0.0159058638229612,0.987309491940711,NA  
"18119","AC072054.1",0.446333638225411,0.779444450202105,2.12907753996  
481,0.366094909918117,0.714294255568695,NA  
"18120","AC092171.1",0.514219695014162,0.89658286418158,2.117022146220  
42,0.423511329714843,0.671922234142867,NA  
"18121","AC092171.4",1.25755773445557,-2.3072258858792,1.3970021933653  
2,-1.65155494875866,0.0986253103952061,NA  
"18122","AC092171.3",1.83416363969985,0.720341672686001,1.242841483951  
26,0.579592556241269,0.562189413985164,NA  
"18123","AC092171.2",1.66253122176076,-0.0634939193518399,1.1912317472  
0765,-0.0533010637944089,0.957492032623056,NA  
"18124","OCM",0.675733486063347,-0.119191875314858,1.93905990652405,-0  
.0614688978477826,0.950985783472985,NA  
"18125","ANKRD61",0.203054089861245,-1.95461545718866,3.33573296423696  
, -0.585962808817275,0.557900507779092,NA  
"18126","FAM220A",1.30463017248363,0.638159489050433,1.49372366547321,  
0.427227273558838,0.669213798096571,NA  
"18127","AC073343.2",1.42276005597844,1.66922892407778,1.3943525886832  
2,1.19713545743415,0.231253761647877,NA  
"18128","AC005532.1",1.52005919695477,0.720614770235262,1.276141491534  
79,0.564682501913322,0.57228973809079,NA  
"18129","AC004982.1",1.01988571484161,0.220441133214927,1.612674070859  
86,0.136692923386181,0.891273523345609,NA  
"18130","AC004948.1",0.171420620199322,0.765902268429694,3.33569101336  
987,0.22960827767316,0.818396174063793,NA  
"18131","AC006042.4",1.71567784076636,1.336835643256,1.29447482914337,  
1.03272432430429,0.301732926948245,NA  
"18132","ICA1",1.71415854276905,-1.83786854092816,1.31631187001797,-1.  
39622575985968,0.162646521853136,NA  
"18133","AC007009.1",0,NA,NA,NA,NA,NA  
"18134","AC007029.1",0.484979126404696,1.93086003716403,2.303186098920  
28,0.838343040568545,0.40183806957618,NA  
"18135","AC004160.2",2.11499261247358,1.02210602123099,1.0916616832112  
2,0.936284598928468,0.349126675562437,NA  
"18136","AC013470.2",0.538776780481471,-3.02494880370971,2.51696373649  
532,-1.20182454750886,0.229431512632645,NA  
"18137","AC011287.1",0.532712821096537,-1.19786126871247,2.33682927544  
051,-0.512601104968038,0.608230380115221,NA  
"18138","AC005550.2",0.939140997607977,-0.240434352785344,1.9131192394  
5199,-0.125676616400667,0.899987912490321,NA  
"18139","LINC02587",1.3808350511618,-0.107326274796516,1.3672459517769  
, -0.0784981477963292,0.937431803522597,NA  
"18140","AC006041.2",0,NA,NA,NA,NA,NA  
"18141","AC005014.3",0.11921983002294,-0.0533240139618846,3.3524751975  
3738,-0.0159058638229612,0.987309491940711,NA  
"18142","AC005014.2",2.04579930484077,0.136983013769237,0.978510065918  
5,0.139991420160461,0.888666769353351,NA

"18143", "TSPAN13", 1.48144761953052, -0.910158623338664, 1.39525223124353, -0.6523255100101, 0.514191206793291, NA  
"18144", "AC019117.1", 0, NA, NA, NA, NA, NA  
"18145", "AC003986.3", 0.321012459280303, -0.877466363834499, 2.33488982647705, -0.37580632451444, 0.70706088561625, NA  
"18146", "TMEM196", 0.505695712807125, -2.90223896060942, 3.11816310694988, -0.930752773689357, 0.351981463997368, NA  
"18147", "MACC1", 1.68774442131141, 1.05203710990466, 1.20517068662807, 0.872936192007903, 0.38269785799646, NA  
"18148", "AC005083.1", 0.848083882561184, -1.10621412613216, 1.71045488962708, -0.646736802496639, 0.517802300094137, NA  
"18149", "DNAH11", 0.268005543297635, -0.150415693622294, 2.77274999608506, -0.0542478383679276, 0.956737707263394, NA  
"18150", "RAPGEF5", 0.362163077772823, -0.055843711240554, 2.5915710022774, -0.0215482080913392, 0.982808347881005, NA  
"18151", "STEAP1B", 2.08395017362395, -0.15029621511176, 1.03354720399926, -0.145417852740732, 0.884380970034617, NA  
"18152", "AC002480.2", 0.154285403418625, -0.774663427007578, 3.35247519753738, -0.231072082972193, 0.817258802814835, NA  
"18153", "AC073072.1", 0.458617980715828, -1.24091004746942, 2.40038870176649, -0.516962126407365, 0.605182597502527, NA  
"18154", "KLHL7-DT", 1.82974236814118, 0.540362550679447, 1.21793304548132, 0.443671803375609, 0.65727988420126, NA  
"18155", "IGF2BP3", 0.361065732044111, 0.3670708605405, 2.57744185534835, 0.142416737657459, 0.886750842401241, NA  
"18156", "STK31", 0.398405565159745, 0.567409957533627, 2.5054830209628, 0.226467293047384, 0.82083799480815, NA  
"18157", "AC005165.1", 0.657643416313372, 2.39163084312877, 1.88314742580823, 1.27001784902863, 0.204078272260656, NA  
"18158", "AC004947.1", 0.0534622507802646, -0.0533240139618838, 3.35247519753738, -0.015905863822961, 0.987309491940711, NA  
"18159", "HOXA2", 2.20362328886021, -0.0619723203648958, 0.963234817991773, -0.064337707906054, 0.94870132906894, NA  
"18160", "AC005091.1", 0.284110384636469, -0.774665791363346, 3.14291126894145, -0.246480325110883, 0.805310433006106, NA  
"18161", "JAZF1-AS1", 1.97636532843101, 0.343606099877426, 1.09702498878736, 0.313216292599902, 0.754116341054824, NA  
"18162", "AC005013.1", 0.350898339321007, 1.45361411466565, 2.54576915420314, 0.570992115394946, 0.568004987527943, NA  
"18163", "AC005162.2", 0.221450767245824, -0.774663427007578, 3.35247519753738, -0.231072082972194, 0.817258802814834, NA  
"18164", "AC004593.3", 0, NA, NA, NA, NA, NA  
"18165", "AC004593.2", 0.220042982661301, -0.774663427007579, 3.35247519753738, -0.231072082972194, 0.817258802814834, NA  
"18166", "AC004593.1", 0, NA, NA, NA, NA, NA  
"18167", "PRR15", 1.04873258562436, -1.09139142012445, 1.63115923137396, -0.669089442117276, 0.503438424435164, NA  
"18168", "AC007285.2", 0, NA, NA, NA, NA, NA

"18169", "AC007036.5", 0.893096749489948, 0.460437724257493, 1.81539039615  
974, 0.253630142161983, 0.799781307814999, NA  
"18170", "AC007036.1", 1.77283248688564, 0.14894908077132, 1.1338933221986  
5, 0.131360753128437, 0.895489934042624, NA  
"18171", "AC006027.1", 0.425415526702263, 0.584089887951628, 2.49754559908  
893, 0.233865555113267, 0.815089354763517, NA  
"18172", "PPP1R17", 0.155693188003149, -0.774663427007578, 3.3524751975373  
8, -0.231072082972193, 0.817258802814835, NA  
"18173", "AC018648.1", 1.22485847882312, 0.295663439189846, 1.442278364150  
2, 0.204997486295965, 0.837574088967307, NA  
"18174", "AC008080.1", 0.0644961186387932, -0.0533240139618838, 3.35247519  
753738, -0.015905863822961, 0.987309491940711, NA  
"18175", "AC008080.4", 0.482687290358951, 0.452511303238315, 2.36900344589  
721, 0.191013357967884, 0.848515127701101, NA  
"18176", "AC007350.1", 0, NA, NA, NA, NA, NA  
"18177", "AC005400.1", 1.50314056925893, 1.46689673573159, 1.4547351410264  
7, 1.00836000613592, 0.313281665444843, NA  
"18178", "AC018647.3", 1.45785110574053, -0.0763657872598429, 1.2204749173  
6285, -0.0625705503435096, 0.95010848087169, NA  
"18179", "AC083864.5", 0.711430596343854, -0.882372789586372, 2.1661096235  
2259, -0.407353709158741, 0.683748220658925, NA  
"18180", "AC006960.3", 0, NA, NA, NA, NA, NA  
"18181", "ANLN", 1.54455967775609, -0.207910789916005, 1.28018614533071, -0  
.162406686460659, 0.870985605708269, NA  
"18182", "AC007349.3", 0.0534622507802646, -0.0533240139618838, 3.35247519  
753738, -0.015905863822961, 0.987309491940711, NA  
"18183", "AC007349.2", 0, NA, NA, NA, NA, NA  
"18184", "ELM01-  
AS1", 0.102686272020481, -0.0533240139618846, 3.35247519753738, -0.0159058  
638229612, 0.987309491940711, NA  
"18185", "GPR141", 0.77995043678508, 0.780192910650871, 1.76989157225478, 0  
.440813958821743, 0.659347687176196, NA  
"18186", "NME8", 0.271251509622856, -0.774665352300728, 3.18287089738686, -  
0.243385728568736, 0.8077065984266, NA  
"18187", "TRGC1", 1.84722968228083, 0.170116542675743, 1.4014656631899, 0.1  
21384738237923, 0.903386304613249, NA  
"18188", "TRGV10", 0.168565237602375, -1.35173207482145, 3.35247519753738,  
-0.40320419844251, 0.686798011343181, NA  
"18189", "TRGV9", 0, NA, NA, NA, NA, NA  
"18190", "AC006033.2", 0.810023534766071, 0.0189466283450694, 1.7756394235  
4624, 0.0106703129553352, 0.991486483586199, NA  
"18191", "TRGV8", 0, NA, NA, NA, NA, NA  
"18192", "TRGV7", 0.168565237602375, -1.35173207482145, 3.35247519753738, -  
0.40320419844251, 0.686798011343181, NA  
"18193", "TRG-  
AS1", 2.229685703196, -0.634784320496702, 1.11233894439334, -0.57067526377  
3049, 0.568219789531154, NA  
"18194", "TRGV5", 0, NA, NA, NA, NA, NA  
"18195", "TRGV4", 0, NA, NA, NA, NA, NA  
"18196", "TRGV3", 0, NA, NA, NA, NA, NA

"18197", "TRGV2", 0, NA, NA, NA, NA, NA  
"18198", "POU6F2", 0, NA, NA, NA, NA, NA  
"18199", "AC004988.1", 0.233061356241168, -0.774663445836492, 3.3508580764  
8355, -0.231183603767975, 0.817172167312465, NA  
"18200", "INHBA-  
AS1", 0.11921983002294, -0.0533240139618846, 3.35247519753738, -0.01590586  
38229612, 0.987309491940711, NA  
"18201", "AC010132.4", 0.106924501560529, 0.385965786494404, 3.34626872025  
989, 0.115342137395477, 0.908173940404949, NA  
"18202", "LUARIS", 0.256971675439106, -0.226175799809587, 2.79502848435046  
, -0.0809207494935953, 0.935504978368658, NA  
"18203", "SPDYE1", 0.804713821255783, 1.66139550862255, 1.62545894656016, 1  
.02210856333126, 0.306729520621298, NA  
"18204", "PGAM2", 0.45325066288311, -0.61028385474067, 2.15474811642802, -0  
.283227468717946, 0.77700247307112, NA  
"18205", "CAMK2B", 0.0644961186387932, -0.0533240139618838, 3.352475197537  
38, -0.015905863822961, 0.987309491940711, NA  
"18206", "NPC1L1", 0.54728681101908, 0.976990887124143, 2.10144117789699, 0  
.464914696352274, 0.641992545678495, NA  
"18207", "AC004938.2", 2.06276081512747, -0.337671772380482, 1.07669896097  
814, -0.313617626298925, 0.753811470646842, NA  
"18208", "LINC01952", 0.0534622507802646, -0.0533240139618838, 3.352475197  
53738, -0.015905863822961, 0.987309491940711, NA  
"18209", "AC004847.1", 0.797891779372063, 0.808093691665401, 1.80398399008  
443, 0.447949480764284, 0.65418965683889, NA  
"18210", "RAMP3", 0.574698354966288, -1.56530683800412, 1.99910061591498, -  
0.783005530358303, 0.433623864453024, NA  
"18211", "AC073115.2", 0, NA, NA, NA, NA, NA  
"18212", "AC073115.1", 0.385063342861405, -0.0385662605686983, 2.951489750  
47283, -0.0130667099767228, 0.989574570521005, NA  
"18213", "AC087175.1", 0.566274161209903, 1.09602175995555, 1.867917406584  
59, 0.586761361124407, 0.55736399045375, NA  
"18214", "PKD1L1", 0.529046557355048, 1.96622132770727, 2.72225886546278, 0  
.722275663292959, 0.470125012374771, NA  
"18215", "SUN3", 0, NA, NA, NA, NA, NA  
"18216", "C7orf57", 0.261339925134462, 0.693947743382389, 3.27302645474789  
, 0.212020206062111, 0.832091270506721, NA  
"18217", "ABCA13", 0.203509424658842, -0.774663427007579, 3.35247519753738  
, -0.231072082972194, 0.817258802814834, NA  
"18218", "VWC2", 1.2790919234488, -2.86545906094854, 1.53706015976673, -1.8  
6424652460149, 0.0622870926061967, NA  
"18219", "COBL", 1.64247560155156, -0.663287643538761, 1.36131048991152, -0  
.487241998393674, 0.626086845861462, NA  
"18220", "AC006459.1", 0.205372544040962, 0.695830627438559, 3.33747149429  
751, 0.208490358233014, 0.834846110249776, NA  
"18221", "EGFR-  
AS1", 1.28448121322551, -0.809793030108677, 1.58922109540583, -0.509553411  
070149, 0.610364370367759, NA  
"18222", "AC237221.1", 0.880344658191084, 0.3777051549187, 1.6963288889771  
8, 0.222660332776884, 0.823799876172039, NA

"18223", "LINC02848", 1.66393477426938, -0.469170489522898, 1.207061382849  
24, -0.388688177908096, 0.697506828719862, NA  
"18224", "AC093582.1", 0.320437418636037, -2.09332987365482, 3.00355285611  
36, -0.696951235399085, 0.485833312087704, NA  
"18225", "SPDYE21P", 0.244351032334407, -0.774664026145693, 3.300629728330  
46, -0.234701887187309, 0.814440122883676, NA  
"18226", "AC092100.1", 1.25660324617004, 1.32620785048532, 1.5952637471412  
6, 0.831340806723591, 0.40578112822273, NA  
"18227", "CT66", 0.633421734142573, 1.29799788717948, 1.98329493502517, 0.6  
54465386996519, 0.512812019957105, NA  
"18228", "AC211476.2", 1.80313768539448, -0.402395031535715, 1.19735449064  
174, -0.336070090086726, 0.736818012639516, NA  
"18229", "AC211476.6", 1.07493495543678, -0.06590897767161, 1.569039263801  
91, -0.0420059454165011, 0.966493958545177, NA  
"18230", "FKBP6", 1.11389235801832, -2.82838346985585, 1.42838376210825, -1  
.98012855150443, 0.0476890856664092, NA  
"18231", "FZD9", 1.06092283157289, -0.524639227111288, 1.32020735177582, -0  
.39739153581109, 0.69107875618987, NA  
"18232", "CLDN3", 0.0644961186387932, -0.0533240139618838, 3.3524751975373  
8, -0.015905863822961, 0.987309491940711, NA  
"18233", "ELN-  
AS1", 0.388608220263676, -1.50962735921242, 2.47349094131884, -0.610322574  
461302, 0.541648145797489, NA  
"18234", "LAT2", 2.27633601183245, -0.3305854156998, 1.29650495005008, -0.2  
54981992692762, 0.798737007396216, NA  
"18235", "AC005081.1", 0.841688398608537, -2.37750678813852, 1.85776456745  
991, -1.27976753878413, 0.200626903487441, NA  
"18236", "AC211433.1", 1.39092799701217, 0.906227512280006, 1.395241867690  
65, 0.649512843088602, 0.516006947860405, NA  
"18237", "AC211486.5", 0, NA, NA, NA, NA  
"18238", "SPDYE5", 0.672067222321857, 2.34505580265746, 1.88752760537221, 1  
.24239549979722, 0.214090675201692, NA  
"18239", "SSC4D", 2.3164690841671, -0.151911001685619, 0.974177531859943, -  
0.155937697922045, 0.876082130121506, NA  
"18240", "UPK3B", 0.3214677940779, 0.229487394597908, 2.32519472873468, 0.0  
986959895280639, 0.921379653212521, NA  
"18241", "AC004921.1", 0.204461874445769, -1.96013641505178, 3.33548947920  
397, -0.587660799793491, 0.556759992345141, NA  
"18242", "AC004990.1", 0.102686272020481, -0.0533240139618846, 3.352475197  
53738, -0.0159058638229612, 0.987309491940711, NA  
"18243", "AC006043.1", 1.77284344225372, 2.23992874352589, 1.3426128270752  
, 1.66833557549531, 0.0952491295035054, NA  
"18244", "AC074024.1", 1.52132780430555, 1.39469850655794, 1.3389768097303  
7, 1.04161513210882, 0.297590150154055, NA  
"18245", "AC006145.1", 1.15913118422448, 3.14531582090125, 2.3021274108434  
3, 1.36626487573461, 0.171855841297515, NA  
"18246", "GRM3", 0.565672502431665, 0.0151880041783435, 2.11457358811399, 0  
.00718253754029431, 0.994269213463365, NA  
"18247", "AC005009.1", 0, NA, NA, NA, NA  
"18248", "AC005009.2", 0.684623114357234, -0.37116918787915, 2.26582401117

16,-0.163812011016349,0.86987913598886,NA  
"18249","ABCB1",0.698156414529276,-0.872368710066581,1.7289924599884,-  
0.5045532182786,0.613872674654261,NA  
"18250","RUNDC3B",0.746263871107395,-0.0286030974148091,1.751026799703  
84,-0.0163350426273584,0.986967101292737,NA  
"18251","AC003991.2",0.233061356241168,-0.774663445836492,3.3508580764  
8355,-0.231183603767975,0.817172167312465,NA  
"18252","AC002064.1",0.32184520322056,-2.1004006767475,3.0000411347961  
3,-0.70012395909706,0.483849894373614,NA  
"18253","FAM237B",0.100823152638361,-1.35173207482145,3.35247519753738  
,-0.40320419844251,0.686798011343181,NA  
"18254","AC002458.1",0.933268514630301,1.10233237496772,1.735450847489  
48,0.635185016367571,0.525307754392362,NA  
"18255","AC079760.2",1.17785223098892,2.39534153745417,1.6256751767088  
9,1.47344412449198,0.140631319817927,NA  
"18256","AC003086.1",0.249044596672051,0.88628321168114,3.274626073559  
89,0.270651729929472,0.786658905412859,NA  
"18257","CYP51A1-  
AS1",1.29742492536391,1.27221676664957,1.37507263830432,0.925199681246  
234,0.354862049287112,NA  
"18258","LRRD1",0.428643702132955,0.231839855979674,2.16669907706373,0  
.107001409856074,0.914787861274528,NA  
"18259","AC000120.1",0.244806367132003,0.695807100884759,3.33664907448  
574,0.208534696143316,0.834811494458112,NA  
"18260","AC000065.2",0.411988757791277,1.6368646095705,2.4646179664558  
3,0.664145369322427,0.506597274767685,NA  
"18261","AC000065.1",0.546498476107323,2.05910874792268,2.650741408339  
3,0.776804837108847,0.437273922505246,NA  
"18262","CALCR",0.102230937222884,-1.35173207482145,3.35247519753738,-  
0.403204198442509,0.686798011343181,NA  
"18263","TFPI2",2.14046551456608,-2.17453120354787,1.13690558356305,-1  
.91267527839287,0.0557896359314675,NA  
"18264","AC003092.2",0.102686272020481,-0.0533240139618846,3.352475197  
53738,-0.0159058638229612,0.987309491940711,NA  
"18265","AC002074.2",0.0534622507802646,-0.0533240139618838,3.35247519  
753738,-0.015905863822961,0.987309491940711,NA  
"18266","PON1",0.844767094019591,2.66947856377029,1.86960468056205,1.4  
2783048819057,0.153340655103439,NA  
"18267","AC004012.1",0,NA,NA,NA,NA,NA  
"18268","ASB4",0.274106892219803,1.20013018856317,2.69897131421608,0.4  
44662076340649,0.65656397946606,NA  
"18269","DLX5",1.21147827723613,2.37303565276729,1.62060217793658,1.46  
429252352897,0.143114039096672,NA  
"18270","BAIAP2L1",0.102230937222884,-1.35173207482145,3.3524751975373  
8,-0.403204198442509,0.686798011343181,NA  
"18271","NPTX2",0,NA,NA,NA,NA,NA  
"18272","TMEM130",0.49131942992558,0.845567594182551,2.13019309305047,  
0.396944106588801,0.691408678058255,NA  
"18273","AC004893.3",0.37379860440959,1.51493741483916,2.5110104748309  
8,0.603317839580552,0.546297267431531,NA

"18274","AC004834.1",0.509691169668736,0.625218405960051,2.38872348861  
324,0.2617374547286,0.793523862151007,NA  
"18275","AC069294.1",0.325836043773255,1.23407280628717,2.635275632255  
14,0.468289840797835,0.639577332490964,NA  
"18276","AC073842.2",0.409834418486731,-0.652810654152876,2.8816406617  
8528,-0.226541311278012,0.820780432500617,NA  
"18277","PVRIG",0.0534622507802646,-0.0533240139618838,3.3524751975373  
8,-0.015905863822961,0.987309491940711,NA  
"18278","SPDYE3",1.03191568514006,1.01470877547604,1.91389390597629,0.  
53018026354937,0.595986953652863,NA  
"18279","AC092849.3",0.890778295310231,-0.738327796536707,1.6278757360  
4736,-0.453552921876849,0.65015064456445,NA  
"18280","NYAP1",1.97549979039001,-0.323183428222925,1.18530492873706,-  
0.27265846989034,0.785115761649101,NA  
"18281","FBX024",0.646558963623681,-1.6412184155229,1.82049227709327,-  
0.90152451409648,0.36730950590253,NA  
"18282","TFR2",1.40025697459457,-2.65353736033257,1.39911122134968,-1.  
89658786223785,0.0578823537934346,NA  
"18283","SLC12A9-  
AS1",0.425536913041481,-0.954245016814906,2.17341335819663,-0.43905362  
6506962,0.660622679653843,NA  
"18284","ACHE",0.666365634914718,-0.909428703110472,2.20135196396443,-  
0.413122807255535,0.679516640264525,NA  
"18285","VGF",0,NA,NA,NA,NA,NA  
"18286","AC006329.1",0.677384626986769,-1.01081852434465,1.94943221231  
224,-0.51851945297739,0.604095891152248,NA  
"18287","AC005096.1",0,NA,NA,NA,NA,NA  
"18288","SPDYE6",0.544180021927606,-0.017456973032037,2.1212873626407,  
-0.00822942395239913,0.993433943796792,NA  
"18289","RASA4B",0.56028486326644,-0.809925366337461,2.32472142109018,  
-0.348396740783523,0.727542249871904,NA  
"18290","UPK3BL2",0.827991495487026,0.357287244183963,1.80652259733108  
,0.197776238565636,0.843220137819576,NA  
"18291","AC105052.4",0.341125932066361,1.37790492328387,3.032905404719  
36,0.454318463457443,0.649599628836418,NA  
"18292","NFE4",0.106924501560529,0.385965786494404,3.34626872025989,0.  
115342137395477,0.908173940404949,NA  
"18293","SLC26A5",0.284240190223044,0.69583062743856,3.33747149429751,  
0.208490358233014,0.834846110249776,NA  
"18294","AC005064.1",0.166727055861678,-0.774663427007578,3.3524751975  
3738,-0.231072082972193,0.817258802814835,NA  
"18295","LHFPL3-  
AS2",0.477993726021306,-0.958617074970513,2.12271389369325,-0.45159975  
5303172,0.651557346327738,NA  
"18296","AC004884.2",0.627072817950979,1.25487472878809,2.047646997039  
39,0.612837432722762,0.539983837039781,NA  
"18297","EFCAB10",0.390471339645796,-0.0601964608967816,2.518316052116  
81,-0.0239034575688713,0.980929616330929,NA  
"18298","AC004917.1",0.168565237602375,-1.35173207482145,3.35247519753  
738,-0.40320419844251,0.686798011343181,NA



"18299", "AC005050.3", 0.11921983002294, -0.0533240139618846, 3.35247519753738, -0.0159058638229612, 0.987309491940711, NA  
"18300", "AC005050.1", 0.102230937222884, -1.35173207482145, 3.35247519753738, -0.403204198442509, 0.686798011343181, NA  
"18301", "PIK3CG", 2.01618507989738, -1.95400199325715, 1.45332104440206, -1.3445081530909, 0.178784121750168, NA  
"18302", "AC006387.1", 1.30380207165156, -2.23950441896603, 1.4243024103465, -1.57235177213609, 0.115868992454044, NA  
"18303", "AC004492.1", 0.7625328273214, -0.556693415557068, 1.54610724747267, -0.360061319463486, 0.718801278074752, NA  
"18304", "GPR22", 0.403460020245984, 1.56382911394003, 2.91211969440415, 0.537007155627923, 0.591262671305975, NA  
"18305", "SLC26A4-AS1", 1.69388776499405, 0.0187734969757595, 1.33741922317333, 0.0140371071766227, 0.98880037670298, NA  
"18306", "SLC26A4", 2.28774882345201, 0.00895496925882739, 1.04427006387457, 0.00857533847671703, 0.993157953682481, NA  
"18307", "AC005046.1", 2.16677041783586, 0.558612235311214, 1.11132341811036, 0.50265496632929, 0.615206876747778, NA  
"18308", "NRCAM", 0, NA, NA, NA, NA, NA  
"18309", "AC073114.1", 0.809082070951138, 2.5769144192486, 1.89399921288718, 1.36056784063833, 0.173650300339163, NA  
"18310", "AC073326.1", 0, NA, NA, NA, NA, NA  
"18311", "AC003077.1", 0.220042982661301, -0.774663427007579, 3.35247519753738, -0.231072082972194, 0.817258802814834, NA  
"18312", "DOCK4-AS1", 1.05205962798962, 1.00671229430894, 1.70082488711754, 0.591896497948742, 0.553919899053851, NA  
"18313", "GPR85", 1.59463654970034, 0.429247097289486, 1.15011691929523, 0.37322040054199, 0.708984413921703, NA  
"18314", "AC003992.1", 1.35920755988713, 0.650414549590099, 1.39256746935958, 0.46706142711291, 0.640455930335185, NA  
"18315", "LINC01393", 0.154285403418625, -0.774663427007578, 3.35247519753738, -0.231072082972193, 0.817258802814835, NA  
"18316", "AC073130.2", 0, NA, NA, NA, NA, NA  
"18317", "AC002066.1", 0.702713204815525, -1.25777564454636, 1.92383058020006, -0.653787114879711, 0.513248969016736, NA  
"18318", "AC073130.1", 0.95092965314792, -0.769011587470775, 1.87389477918759, -0.410381413093094, 0.681526178770311, NA  
"18319", "MET", 1.35698576897395, -2.31605990897042, 1.35368400554488, -1.71093098498875, 0.0870938539046138, NA  
"18320", "AC002542.6", 0.172682080803205, 0.494635591052761, 3.34300496985029, 0.147961368742719, 0.882373255878367, NA  
"18321", "ANKRD7", 1.37641527937675, -1.31313367609005, 1.28497823090423, -1.0219112234812, 0.30682291992647, NA  
"18322", "AC006364.1", 0, NA, NA, NA, NA, NA  
"18323", "WNT16", 2.35298065033627, 0.865217630344691, 3.14794111894931, 0.274851910391982, 0.783430014586312, NA  
"18324", "RNF148", 1.24701461308235, -1.40473993972317, 1.28509526347263, -1.09310179536981, 0.274349107809866, NA

"18325", "ASB15", 0.100823152638361, -1.35173207482145, 3.35247519753738, -0.40320419844251, 0.686798011343181, NA  
"18326", "LMOD2", 0, NA, NA, NA, NA, NA  
"18327", "POT1-  
AS1", 2.02728024946443, 0.583291208160344, 1.09962558294981, 0.530445287200057, 0.595803233830003, NA  
"18328", "AC000123.1", 0, NA, NA, NA, NA, NA  
"18329", "LEP", 0.540051684633713, -2.94149326573343, 2.57754249692421, -1.14120068601915, 0.2537864189363, NA  
"18330", "AC018635.2", 0.102686272020481, -0.0533240139618846, 3.35247519753738, -0.0159058638229612, 0.987309491940711, NA  
"18331", "FAM71F1", 0.306195696679323, -0.0320258052725539, 3.12823849898919, -0.0102376482109348, 0.991831681239967, NA  
"18332", "IRF5", 1.73952472470377, -1.19429516936861, 1.18843908254211, -1.00492754480437, 0.31493173988437, NA  
"18333", "STRIP2", 0.426659196411616, 0.480302672817779, 2.21836541996104, 0.216511972507313, 0.828588693767601, NA  
"18334", "AC073320.1", 1.24476880038993, 0.341673756780829, 1.40517637569896, 0.243153644403447, 0.807886375690588, NA  
"18335", "CPA2", 0.100823152638361, -1.35173207482145, 3.35247519753738, -0.40320419844251, 0.686798011343181, NA  
"18336", "CPA4", 1.81619933732096, 1.07447598849026, 1.12433854228332, 0.955651654801592, 0.339248255095802, NA  
"18337", "CPA5", 0.155693188003149, -0.774663427007578, 3.35247519753738, -0.231072082972193, 0.817258802814835, NA  
"18338", "CPA1", 1.49181087085182, 0.722656152322353, 1.93528854771212, 0.373410028792176, 0.708843296531461, NA  
"18339", "AC007938.1", 1.1719073057873, 3.18831393508786, 1.88826721563194, 1.68848662344691, 0.0913178546043925, NA  
"18340", "MESTIT1", 2.32986029551619, 0.675844695142625, 1.04626378341846, 0.645960135344106, 0.518305172938962, NA  
"18341", "AC007938.2", 1.30663818780753, 1.69177148798254, 1.36175003683176, 1.24235097648215, 0.214107094805943, NA  
"18342", "AC016831.7", 19.7438740626289, 0.869109087392754, 0.769512430355874, 1.1294282627648, NA, NA  
"18343", "LRGUK", 0.693112059182943, -0.138622334029676, 1.73225858046733, -0.0800240423645522, 0.936218134246523, NA  
"18344", "AKR1B15", 0.529046557355048, 1.96622132770727, 2.72225886546278, 0.722275663292959, 0.470125012374771, NA  
"18345", "AC083870.1", 1.06559841159265, 1.27084300032762, 1.48457737458241, 0.85603015517133, 0.391981099882847, NA  
"18346", "AC009542.1", 0, NA, NA, NA, NA, NA  
"18347", "AC091736.1", 1.04342119162152, 1.14259195555487, 1.41438728150723, 0.807835287049017, 0.419185408504587, NA  
"18348", "AC024084.1", 0.142120095111522, -0.0533240139618842, 3.35247519753738, -0.0159058638229611, 0.987309491940711, NA  
"18349", "AC078845.1", 0.370211542879096, -2.53866757706578, 2.85090778608902, -0.890476917371089, 0.373209857351095, NA  
"18350", "DGKI", 0.734931092171817, 0.637833555607984, 2.20046410892642, 0.289863194323663, 0.771920900007171, NA

"18351", "SVOPL", 0, NA, NA, NA, NA, NA  
"18352", "RAB19", 0, NA, NA, NA, NA, NA  
"18353", "AC006452.1", 0.142120095111522, -0.0533240139618842, 3.352475197  
53738, -0.0159058638229611, 0.987309491940711, NA  
"18354", "TMEM178B", 1.53898532617069, 1.76928715090326, 1.32790457431877,  
1.3323902824952, 0.182731973646178, NA  
"18355", "AC073878.1", 0, NA, NA, NA, NA, NA  
"18356", "AC004918.4", 0.799335517451071, 0.588924659211152, 1.60605859030  
75, 0.366689398982882, 0.713850714964681, NA  
"18357", "MGAM", 0.566274161209903, 1.09602175995555, 1.86791740658459, 0.5  
86761361124407, 0.55736399045375, NA  
"18358", "CLEC5A", 0.220042982661301, -0.774663427007579, 3.35247519753738  
, -0.231072082972194, 0.817258802814834, NA  
"18359", "TRBV3-1", 0, NA, NA, NA, NA, NA  
"18360", "TRBV4-1", 0, NA, NA, NA, NA, NA  
"18361", "TRBV5-1", 0, NA, NA, NA, NA, NA  
"18362", "TRBV9", 0, NA, NA, NA, NA, NA  
"18363", "TRBV5-4", 0, NA, NA, NA, NA, NA  
"18364", "TRBV14", 0.117958369419058, 0.451348601316665, 3.34428110054629,  
0.134961322851401, 0.892642454377335, NA  
"18365", "TRBV18", 0, NA, NA, NA, NA, NA  
"18366", "TRBV20-1", 0, NA, NA, NA, NA, NA  
"18367", "MTRNR2L6", 0.347492639152484, 1.36515954890128, 3.01727533496929  
, 0.452447787273339, 0.650946427429436, NA  
"18368", "TRBV28", 0.102230937222884, -1.35173207482145, 3.35247519753738,  
-0.403204198442509, 0.686798011343181, NA  
"18369", "AC244472.1", 0, NA, NA, NA, NA, NA  
"18370", "KEL", 0.102686272020481, -0.0533240139618846, 3.35247519753738, -  
0.0159058638229612, 0.987309491940711, NA  
"18371", "AC073342.1", 0.244351032334407, -0.774664026145693, 3.3006297283  
3046, -0.234701887187309, 0.814440122883676, NA  
"18372", "CLCN1", 0.639599933119832, -3.28319869947341, 2.38192926948887, -  
1.37837791471362, 0.16808663851611, NA  
"18373", "AC093673.2", 0.0644961186387932, -0.0533240139618838, 3.35247519  
753738, -0.015905863822961, 0.987309491940711, NA  
"18374", "EPA1", 1.0974601635386, 1.0641081056116, 1.49345558590017, 0.712  
514061789265, 0.476146506977677, NA  
"18375", "CTAGE6", 0.837876461841448, -1.03017918974401, 1.61175776611294,  
-0.639165023059565, 0.522715583380465, NA  
"18376", "OR2A42", 1.53855253760588, -0.42523255514439, 1.29427840081637, -  
0.328547980771503, 0.742497372326863, NA  
"18377", "OR2A7", 0.515187020587566, -0.0582541577447833, 2.07304121846138  
, -0.0281008198129411, 0.977581740216675, NA  
"18378", "OR2A1", 0.279606582363734, 1.19594067730093, 3.16985479259559, 0.  
377285634690431, 0.705961346602518, NA  
"18379", "AC005518.1", 0, NA, NA, NA, NA, NA  
"18380", "AC006974.1", 0, NA, NA, NA, NA, NA  
"18381", "AC073140.2", 0.710222338322217, -0.375602833825772, 1.5982577317  
6241, -0.235007675146106, 0.814202776127943, NA  
"18382", "GHET1", 1.13099510008673, 1.49702257904072, 1.45709618791651, 1.0

2740134210446,0.304231519788238,NA  
"18383","AC073314.1",0,NA,NA,NA,NA,NA  
"18384","SSP0",0.408881968699804,0.547611082492514,2.92451725942926,0.  
187248367479077,0.851465903655842,NA  
"18385","AC004877.1",0.508429709064854,0.69367862620079,1.913411991720  
28,0.362534900587264,0.716952347855726,NA  
"18386","ATP6V0E2-  
AS1",1.46795098637002,0.812038858988265,1.30920064696804,0.62025546723  
4038,0.53508960882709,NA  
"18387","AC092681.3",0,NA,NA,NA,NA,NA  
"18388","AC092666.1",0.11921983002294,-0.0533240139618846,3.3524751975  
3738,-0.0159058638229612,0.987309491940711,NA  
"18389","AC006008.1",0.128992237277586,0.513744972953418,3.34245151459  
318,0.153703044220807,0.877843884367224,NA  
"18390","ACTR3C",0.502335506889579,0.932160916161699,2.38723332895458,  
0.390477505845611,0.696183485556408,NA  
"18391","ZBED6CL",0.759702167797143,-0.0137371702142274,1.721484984382  
2,-0.0079798373723006,0.993633078534925,NA  
"18392","LINC00996",0.172682080803205,0.494635591052761,3.343004969850  
29,0.147961368742719,0.882373255878367,NA  
"18393","GIMAP8",1.75832264807161,-0.704863631773761,1.32673050601761,  
-0.531278679865076,0.595225677302073,NA  
"18394","AOC1",0.142120095111522,-0.0533240139618842,3.35247519753738,  
-0.0159058638229611,0.987309491940711,NA  
"18395","KCNH2",0,NA,NA,NA,NA,NA  
"18396","NOS3",0.723536548133426,0.341592346451587,1.73600050178291,0.  
196769727946947,0.844007741552964,NA  
"18397","ATG9B",0.154285403418625,-0.774663427007578,3.35247519753738,  
-0.231072082972193,0.817258802814835,NA  
"18398","ASIC3",1.19835778159412,0.882309128546372,1.67933840315289,0.  
525390908044424,0.599311472638956,NA  
"18399","AC093583.1",1.65061257029268,1.89824737500212,1.5147768651577  
7,1.25315313341837,0.210149982316119,NA  
"18400","AC006017.1",0.621812825639778,0.829522326388108,2.02563976876  
811,0.409511275981997,0.682164493466916,NA  
"18401","DPP6",0.128992237277586,0.513744972953418,3.34245151459318,0.  
153703044220807,0.877843884367224,NA  
"18402","AC099552.5",1.36903683768872,-0.943890569715121,1.27989767009  
061,-0.737473465084358,0.460834473946757,NA  
"18403","EN2",0.683331960773673,1.35172912403494,2.02943060450594,0.66  
6063240119519,0.505370679440478,NA  
"18404","AC009403.2",0.462344219480069,0.7678249073774,2.4377512565391  
1,0.314972622952305,0.752782440400613,NA  
"18405","RNF32",1.50845028276922,0.222541924781952,1.55782368611398,0.  
142854372266664,0.886405194536303,NA  
"18406","AC005534.1",1.37821786986986,0.368656928107651,1.932548715533  
48,0.190762036239735,0.84871203311721,NA  
"18407","AC005481.1",0.502930018920923,0.689658075194422,2.33941299520  
584,0.294799625635891,0.768146952431792,NA  
"18408","AC011899.2",0.367431897323466,1.50566789164441,2.924126155225

86,0.514912083718944,0.606614456484223,NA  
"18409","AC011899.3",0.393326722242743,1.64399951364785,2.145229623362  
61,0.766351301391646,0.443467300857864,NA  
"18410","LINC00689",1.76521672940185,-0.703890369196917,1.127567305829  
66,-0.624255745584072,0.532459642178092,NA  
"18411","AC004908.3",0.358747277864394,-1.79344174898354,2.50947896308  
126,-0.714666978830322,0.474814846659672,NA  
"18412","AC083964.1",1.30630613441044,-0.691066550785047,1.42663524900  
218,-0.484403109532303,0.628099812036909,NA  
"18413","AF067845.2",0,NA,NA,NA,NA,NA  
"18414","AF067845.1",0,NA,NA,NA,NA,NA  
"18415","AC100810.3",1.51029084305689,0.695353681059006,1.358246677470  
24,0.51194948060106,0.608686366940947,NA  
"18416","AC019257.9",0.661831061022258,-1.31299323682421,1.81292168937  
117,-0.724241562402862,0.468917446375306,NA  
"18417","AC019257.1",0.270796174825259,-2.10201442494854,3.17084321545  
501,-0.662919697417743,0.507381985665671,NA  
"18418","AC245164.2",0,NA,NA,NA,NA,NA  
"18419","AC245187.2",0,NA,NA,NA,NA,NA  
"18420","AC245123.1",0.100823152638361,-1.35173207482145,3.35247519753  
738,-0.40320419844251,0.686798011343181,NA  
"18421","AC115485.1",0.102686272020481,-0.0533240139618846,3.352475197  
53738,-0.0159058638229612,0.987309491940711,NA  
"18422","CSMD1",0.410745088081924,1.66416763505049,3.3004354676269,0.5  
04226685046224,0.614102090381297,NA  
"18423","AC018398.1",0.221906102043421,0.695830468846429,3.33747149841  
039,0.208490310457437,0.834846147549618,NA  
"18424","AF287957.1",0.454417140713014,1.80077312122846,2.359365219471  
33,0.763244751752325,0.445317444238798,NA  
"18425","DEFA3",0,NA,NA,NA,NA,NA  
"18426","FAM85B",0.751103973994414,0.392569705535579,1.77094701450994,  
0.221672191386376,0.824569079607502,NA  
"18427","PRAG1",1.30865924274331,-1.08601301356712,1.32137674732393,-0  
.821879918627696,0.411145243081211,NA  
"18428","AC022784.5",0.780337181288254,-1.14620223653132,1.74739166585  
579,-0.65595038532473,0.511856047756919,NA  
"18429","AC022784.1",0.50415336729777,-0.889907027585253,2.10760987318  
723,-0.422235176873362,0.672853367898664,NA  
"18430","AC021242.3",0.102230937222884,-1.35173207482145,3.35247519753  
738,-0.403204198442509,0.686798011343181,NA  
"18431","AC034111.2",0.394132848049029,0.436200404954529,2.52699059775  
496,0.172616552409043,0.862952840268597,NA  
"18432","AC023385.1",0,NA,NA,NA,NA,NA  
"18433","AC104964.3",0.525354627879402,-2.0355711118599,2.036729480916  
76,-0.999431260229833,0.317585822880453,NA  
"18434","AC104964.1",0.102686272020481,-0.0533240139618846,3.352475197  
53738,-0.0159058638229612,0.987309491940711,NA  
"18435","AC104964.4",0.242943247749883,-0.774663951729422,3.3071134315  
1841,-0.234241724020258,0.814797324817481,NA  
"18436","RP1L1",0,NA,NA,NA,NA,NA

"18437","SOX7",1.88274546604413,0.458656788519348,1.05233453106938,0.435846943132488,0.662947782124294,NA  
"18438","AC105001.1",0,NA,NA,NA,NA,NA  
"18439","XKR6",1.36371136215987,-0.205784703444403,1.35172167639237,-0.152238960903272,0.878998465729219,NA  
"18440","AF131215.6",0.883034439280729,0.728661777475895,1.60607090048352,0.453692160947893,0.650050409874785,NA  
"18441","AF131215.5",0.275368352823686,1.11865680170283,2.73977894622596,0.408301846119294,0.683052084109357,NA  
"18442","AF131215.4",0.221906102043421,0.695830468846429,3.33747149841039,0.208490310457437,0.834846147549618,NA  
"18443","AF131215.2",0.11921983002294,-0.0533240139618846,3.35247519753738,-0.0159058638229612,0.987309491940711,NA  
"18444","AF131216.4",1.1572071631016,0.250786703495463,1.47898512567237,0.169566751647655,0.865350872167473,NA  
"18445","AF131216.1",1.45892757070344,0.312847525544827,1.6224877030264,0.192819658947971,0.847100206784711,NA  
"18446","SLC35G5",1.18345410168017,0.180697618656216,1.44773383041171,0.12481411628326,0.900670711609551,NA  
"18447","FAM167A",0.549138944429206,-0.00565411724517455,2.36595470359823,-0.00238978254172642,0.998093231221226,NA  
"18448","BLK",0.362764736551061,1.46681914601225,2.23095446981539,0.657485020809783,0.510869099430787,NA  
"18449","AC022239.1",0,NA,NA,NA,NA,NA  
"18450","AC025857.2",0.350443004523411,0.278677423508893,2.58156446456357,0.107949046918727,0.914036110590592,NA  
"18451","FAM66A",0.497959387757528,0.575117227956993,2.34607984790005,0.245139664991272,0.806348291468524,NA  
"18452","AC087203.3",0.6100589875095,-1.29372261370107,2.02146567527162,-0.639992372626976,0.522177558140115,NA  
"18453","AC130352.1",0.859130202315524,0.23816716503767,1.64066898331388,0.145164666035565,0.884580862800338,NA  
"18454","SGCZ",1.89932245952989,3.05032528948223,1.3828424370177,2.20583720012288,0.0273954006037201,NA  
"18455","AC011586.2",1.02546166528921,0.535874966377979,1.72217768157504,0.311161253633183,0.755678037012639,NA  
"18456","FGF20",0.142120095111522,-0.0533240139618842,3.35247519753738,-0.0159058638229611,0.987309491940711,NA  
"18457","AC079193.2",0.632031740452578,1.24546667028876,1.85494724659335,0.671429698378803,0.50194683093339,NA  
"18458","MTMR7",1.2870805523107,-0.576424765757295,1.45780269410108,-0.395406571883676,0.692542859742082,NA  
"18459","AP006248.4",0.729319387335841,-0.737679153308725,2.20601968480046,-0.334393731112807,0.738082469272202,NA  
"18460","AP006248.6",1.14502820456984,-2.59616278769894,1.73161617832631,-1.49927150149882,0.133803212411652,NA  
"18461","AC027117.1",1.21318223534972,-0.618842985596024,1.35331363912395,-0.45727979657149,0.647469949381549,NA  
"18462","AC025062.3",0.405193119472797,1.65677585805238,2.44146139556741,0.678600063494895,0.497391302605588,NA

"18463","AC100800.1",0.460978215087279,-2.14440980586558,2.33381947746  
174,-0.918841335662277,0.358178568161686,NA  
"18464","AC100849.1",0.220042982661301,-0.774663427007579,3.3524751975  
3738,-0.231072082972194,0.817258802814834,NA  
"18465","LZTS1",1.98556762588392,1.09890102862129,1.19120490018803,0.9  
22512179430951,0.356261480366503,NA  
"18466","AC021613.1",0,NA,NA,NA,NA,NA  
"18467","NPM2",1.2081901453271,1.59054400974868,1.36542189305097,1.164  
87366860267,0.244070133419023,NA  
"18468","FGF17",1.14888732376637,-1.28620909662949,1.3899456349554,-0.  
925366477855633,0.354775309783046,NA  
"18469","DMTN",1.07765423564568,0.573632231285956,1.37065672030398,0.4  
18509042263141,0.675574976803673,NA  
"18470","AC105206.3",1.15328605152911,0.794178114840952,1.899047687569  
05,0.418198089515893,0.675802292493063,NA  
"18471","AC037459.4",0.102686272020481,-0.0533240139618846,3.352475197  
53738,-0.0159058638229612,0.987309491940711,NA  
"18472","AC105046.2",0.102686272020481,-0.0533240139618846,3.352475197  
53738,-0.0159058638229612,0.987309491940711,NA  
"18473","AC037441.2",0.205372544040962,0.695830627438559,3.33747149429  
751,0.208490358233014,0.834846110249776,NA  
"18474","AC107959.2",0,NA,NA,NA,NA,NA  
"18475","TNFRSF10C",0.659078541721669,1.24086714970065,1.9529912422668  
9,0.635367493128307,0.525188763909604,NA  
"18476","TNFRSF10A-AS1",0,NA,NA,NA,NA,NA  
"18477","TNFRSF10A",1.60865615015012,0.327520938174323,1.2390662046464  
7,0.264328844533187,0.791526535715773,NA  
"18478","AC100861.1",0.846822421957302,-0.959454455380499,1.5509468179  
6819,-0.618624987178751,0.536163436967941,NA  
"18479","AC100861.2",0,NA,NA,NA,NA,NA  
"18480","AC090197.1",1.39160410266315,-0.0522440031370512,1.2313217451  
0426,-0.0424292053192217,0.966156546828571,NA  
"18481","AC104561.4",0.154285403418625,-0.774663427007578,3.3524751975  
3738,-0.231072082972193,0.817258802814835,NA  
"18482","NKX3-1",2.12175965364951,-1.48596787628015,1.09967998049016,-  
1.35127300909652,0.176607994792651,NA  
"18483","AC120193.1",0,NA,NA,NA,NA,NA  
"18484","ADAMDEC1",0.692056746099657,-3.36118308835324,1.8124196024025  
7,-1.85452810370049,0.0636636432988712,NA  
"18485","AF106564.1",0,NA,NA,NA,NA,NA  
"18486","NEFM",1.76975828068092,3.76684345953927,1.82157883800858,2.06  
79003186364,0.0386493974592899,NA  
"18487","NEFL",0.361734361109198,-0.774668275573776,2.90649032210001,-  
0.266530485129591,0.789830684487713,NA  
"18488","AC107373.3",0,NA,NA,NA,NA,NA  
"18489","CDCA2",0.993156023536182,-2.33152406447191,1.62738901243771,-  
1.43267777197257,0.151949944647651,NA  
"18490","AC009623.1",0.285140760078332,1.24218829249876,2.672339550613  
69,0.464831758454311,0.642051942885121,NA  
"18491","AC090103.1",0.529491792412739,1.00459733024276,1.877126325073

08,0.5351783291429,0.592526550011079,NA  
"18492","AC011726.2",0.305740361881726,-1.38485840137887,2.64966120810  
703,-0.52265489532839,0.601214431685811,NA  
"18493","ADRA1A",0,NA,NA,NA,NA,NA  
"18494","ESC02",7.58291913962603,-2.14641725528386,1.08227337229214,-1  
.98324869689621,NA,NA  
"18495","PBK",1.06718540140755,1.03565931664573,1.71188603288712,0.604  
981462988558,0.545191313584019,NA  
"18496","NUGGC",0.100823152638361,-1.35173207482145,3.35247519753738,-  
0.40320419844251,0.686798011343181,NA  
"18497","PNOC",0.322273919884185,-1.38549380438952,2.60912169626995,-0  
.531019233932344,0.595405450737739,NA  
"18498","EXTL3-  
AS1",0.815001134394289,0.158252244624672,1.90428721455403,0.0831031387  
572138,0.933769530114327,NA  
"18499","INTS9-  
AS1",0.609630270845875,-2.2109674626409,1.98664991938671,-1.1129124668  
9474,0.265746025198167,NA  
"18500","HMB0X1-IT1",0,NA,NA,NA,NA,NA  
"18501","AC108449.2",0.903409252723569,-0.117623738757695,1.5985279290  
4696,-0.0735825359196711,0.941342567779895,NA  
"18502","AC108449.3",0.102686272020481,-0.0533240139618846,3.352475197  
53738,-0.0159058638229612,0.987309491940711,NA  
"18503","AC084026.2",0,NA,NA,NA,NA,NA  
"18504","LINC02099",0.0644961186387932,-0.0533240139618838,3.352475197  
53738,-0.015905863822961,0.987309491940711,NA  
"18505","MBOAT4",0,NA,NA,NA,NA,NA  
"18506","AC026979.3",1.42390320508881,1.0972711828426,1.30979637496373  
,0.837741807670671,0.402175727548619,NA  
"18507","AC090820.2",0.168565237602375,-1.35173207482145,3.35247519753  
738,-0.40320419844251,0.686798011343181,NA  
"18508","SMIM18",0.11921983002294,-0.0533240139618846,3.35247519753738  
, -0.0159058638229612,0.987309491940711,NA  
"18509","NRG1",0.482790692380287,0.732321815004169,2.44449961489893,0.  
299579435619771,0.764497972111282,NA  
"18510","AC090204.1",1.05336379598407,1.10499748993086,1.8277637402211  
2,0.604562540340789,0.545469702843167,NA  
"18511","DUSP26",0.0644961186387932,-0.0533240139618838,3.352475197537  
38,-0.015905863822961,0.987309491940711,NA  
"18512","AC124067.4",0.853348085802911,-0.336335547721189,1.7103863956  
0937,-0.196643020889651,0.844106902051471,NA  
"18513","AC138356.1",0.789311703701898,0.860060288183923,1.89112868400  
757,0.454786760656252,0.649262655860799,NA  
"18514","AP006545.1",0.7837678190982,0.153697709406222,1.7352655334312  
9,0.0885730203505523,0.929421250431862,NA  
"18515","AP006545.2",0,NA,NA,NA,NA,NA  
"18516","STAR",1.03428054968391,2.17576217372657,1.59544645724698,1.36  
373249245917,0.172651773746085,NA  
"18517","AC084024.4",0.959574479887407,1.17822039246906,1.678360912999  
37,0.702006572807679,0.482675064437836,NA



"18518", "AC087362.2", 0.489612734264007, 1.86833572249417, 2.73765143148874, 0.682459315676347, 0.494948560030396, NA  
"18519", "AC087362.1", 0.388633157905099, 0.432636944008462, 2.25154176219256, 0.192151418762563, 0.84762359891593, NA  
"18520", "AC087623.1", 1.26900659296271, 1.66971812663152, 1.73915003574628, 0.960077102212194, 0.337016411699034, NA  
"18521", "C8orf86", 0.37759929004657, 0.381134982021306, 2.25853338012443, 0.168753309282641, 0.865990685290599, NA  
"18522", "AC016813.1", 0, NA, NA, NA, NA, NA  
"18523", "ID02", 0.330638542554308, -0.807230023191745, 3.05102334231092, -0.264576810015596, 0.791335486599417, NA  
"18524", "ZMAT4", 0, NA, NA, NA, NA, NA  
"18525", "AC104393.1", 0.66974876814214, 0.445332126424661, 1.80450375638499, 0.246789248761005, 0.805071331435339, NA  
"18526", "AC009630.2", 0.100823152638361, -1.35173207482145, 3.35247519753738, -0.40320419844251, 0.686798011343181, NA  
"18527", "AC009630.4", 0.558877078681917, -0.803662242643885, 2.32554208723538, -0.34558060550918, 0.729657923499766, NA  
"18528", "AC113133.1", 0, NA, NA, NA, NA, NA  
"18529", "AC103724.4", 0.339262812684241, -0.0349910483728248, 3.04454514673679, -0.0114930298899752, 0.990830090769536, NA  
"18530", "AC103724.3", 0, NA, NA, NA, NA, NA  
"18531", "AC083973.1", 1.21575855256309, -1.40843388891106, 1.283204596048, -1.09759105699024, 0.272383099680124, NA  
"18532", "AC087533.1", 0.945537418382094, -0.274942930361135, 1.44981944320796, -0.189639428308934, 0.849591688486202, NA  
"18533", "AC120036.4", 0.737630030339902, -0.98127225947202, 1.78550358915569, -0.549577309971152, 0.582609325166599, NA  
"18534", "AC024451.4", 1.24079258317002, -0.732350881401272, 1.49658873460329, -0.489346782097353, 0.624596205934016, NA  
"18535", "AC022915.2", 0.168565237602375, -1.35173207482145, 3.35247519753738, -0.40320419844251, 0.686798011343181, NA  
"18536", "LINC02599", 0.351730868692533, 1.42565098196998, 2.54019003026299, 0.561237925110027, 0.574635352232741, NA  
"18537", "LINC02847", 0.629603802018793, -0.724868805869404, 2.02374494714006, -0.358181897819576, 0.720207193231074, NA  
"18538", "AC100805.1", 0.102230937222884, -1.35173207482145, 3.35247519753738, -0.403204198442509, 0.686798011343181, NA  
"18539", "AC013701.2", 0.328375268806354, 0.172498022251954, 2.6100520245636, 0.0660898789099026, 0.947306268694869, NA  
"18540", "AC044893.1", 0.441493749907125, -0.674949016570692, 2.46628730153846, -0.273670069237133, 0.784338181194027, NA  
"18541", "AC090186.1", 0.156148522800746, 0.494635591052761, 3.34300496985029, 0.147961368742719, 0.882373255878367, NA  
"18542", "AC103769.1", 1.78195478811805, -1.63476806171398, 1.06654266268467, -1.53277324846902, 0.12533173414197, NA  
"18543", "ST18", 0.528720300051293, -2.30829680860916, 2.26096016824435, -1.0209365211425, 0.307284514710953, NA  
"18544", "AC131902.1", 0, NA, NA, NA, NA, NA  
"18545", "AC022034.3", 0.790555587979984, 0.396255380907102, 1.75682639615

973,0.225551814210716,0.821550021715704,NA  
"18546","RGS20",1.06913158033312,0.36476341879548,1.62299392784915,0.2  
24747247994254,0.822175906145249,NA  
"18547","SOX17",1.26081327141835,-2.20697622459075,1.62736797107743,-1  
.35616299682338,0.175047312559315,NA  
"18548","XKR4",0.244806367132003,0.695807100884759,3.33664907448574,0.  
208534696143316,0.834811494458112,NA  
"18549","AC018607.1",0,NA,NA,NA,NA,NA  
"18550","AC107952.2",0.957558773408878,1.13411394130987,1.549566316144  
4,0.731891194003076,0.464234981444434,NA  
"18551","SDR16C5",0.102686272020481,-0.0533240139618846,3.352475197537  
38,-0.0159058638229612,0.987309491940711,NA  
"18552","AC012349.1",0.624403572762573,1.3015110789719,1.8013983332050  
1,0.72250043479072,0.469986858137793,NA  
"18553","AC013644.1",0.713645284977539,2.48187383008602,2.074288507225  
41,1.19649403708349,0.231503824151323,NA  
"18554","LINC00588",0.297813283114671,-0.22601258613788,2.681668061922  
23,-0.0842805973442787,0.932833338585223,NA  
"18555","AC090796.1",0.310433926219371,0.171794429070976,2.65395493672  
705,0.0647314793079491,0.948387798511658,NA  
"18556","CYP7A1",1.91163044905392,0.227283772236238,1.14339839948092,0.  
.198779158987296,0.842435499377238,NA  
"18557","AC105150.1",0,NA,NA,NA,NA,NA  
"18558","AC090152.1",1.54166204794499,0.896389109621991,1.214069432158  
74,0.738334304347089,0.460311325447044,NA  
"18559","CA8",0,NA,NA,NA,NA,NA  
"18560","LINC01301",1.04953670678185,1.10017659242001,1.49391275935567  
,0.736439651867304,0.4614631810792,NA  
"18561","AC068389.3",0.168565237602375,-1.35173207482145,3.35247519753  
738,-0.40320419844251,0.686798011343181,NA  
"18562","AC068389.1",0.0644961186387932,-0.0533240139618838,3.35247519  
753738,-0.015905863822961,0.987309491940711,NA  
"18563","AC113143.3",0.100823152638361,-1.35173207482145,3.35247519753  
738,-0.40320419844251,0.686798011343181,NA  
"18564","AC022182.1",0.417488447935208,1.62697571789112,2.182440750832  
19,0.745484484410737,0.455978887347416,NA  
"18565","AC022182.2",0.461888884682472,-0.261206259066425,2.1654305904  
1164,-0.120625551436756,0.903987629498604,NA  
"18566","CLVS1",0.584069179816244,1.08219150349042,2.08904547951095,0.  
518031567098174,0.604436244866336,NA  
"18567","AC091173.1",0.100823152638361,-1.35173207482145,3.35247519753  
738,-0.40320419844251,0.686798011343181,NA  
"18568","NKAIN3",0.100823152638361,-1.35173207482145,3.35247519753738,  
-0.40320419844251,0.686798011343181,NA  
"18569","AC104232.2",0.0644961186387932,-0.0533240139618838,3.35247519  
753738,-0.015905863822961,0.987309491940711,NA  
"18570","AC100812.1",0.950335141116575,-0.459424269443845,1.5059230199  
6805,-0.305078190154496,0.760306601625039,NA  
"18571","DNAJC5B",0.584060546000155,-0.895447200338161,2.2840747513346  
8,-0.392039358525773,0.695029132903718,NA

"18572", "AC084082.1", 0.0644961186387932, -0.0533240139618838, 3.35247519  
753738, -0.015905863822961, 0.987309491940711, NA  
"18573", "AC009879.4", 0, NA, NA, NA, NA, NA  
"18574", "RRS1-AS1", 0, NA, NA, NA, NA, NA  
"18575", "VXN", 1.11795233067221, 0.298599866006282, 1.58829579968948, 0.18  
8000160967913, 0.850876524996218, NA  
"18576", "MCMDC2", 2.26849589252461, -0.636162378398878, 1.00056122361463,  
-0.635805549310294, 0.524903170058314, NA  
"18577", "PPP1R42", 0.49495600068739, -0.211707355424753, 2.14088090216778  
, -0.098887964860813, 0.921227224716588, NA  
"18578", "AC021321.2", 0.972691351749348, -0.0477515745768617, 1.880123274  
35197, -0.025398108319956, 0.979737419964496, NA  
"18579", "CPA6", 0.269868662679755, 1.13857476503723, 3.23247437146312, 0.3  
52230098121977, 0.724665706448339, NA  
"18580", "C8orf34-AS1", 0, NA, NA, NA, NA, NA  
"18581", "C8orf34", 0.995556579456602, -2.05098106202774, 1.50197784312994  
, -1.3655201848742, 0.172089613382515, NA  
"18582", "SLC05A1", 0.980586687952446, -0.371459267435386, 1.6413775838932  
2, -0.226309455594193, 0.82096074465568, NA  
"18583", "LACTB2-  
AS1", 0.685038656435246, 0.465618713854474, 1.59905355519109, 0.2911839396  
14099, 0.770910644980579, NA  
"18584", "XKR9", 0.604008979793994, 0.212865685549163, 1.87359403426541, 0.  
113613558570399, 0.909544138765603, NA  
"18585", "AC078906.1", 0.504728407942036, -0.0350927274030204, 1.905401061  
55308, -0.0184175017591396, 0.985305790425872, NA  
"18586", "AC013562.1", 1.88942280395478, 3.87290258347599, 1.4960375328885  
7, 2.58877367601744, 0.00963183760110612, NA  
"18587", "AC022893.3", 0, NA, NA, NA, NA, NA  
"18588", "SBSPON", 0.789441723857206, 1.62962340816092, 1.95674196270035, 0  
.832824889139705, 0.404943495568001, NA  
"18589", "RDH10-  
AS1", 1.93059675522243, 0.408777669635612, 1.28740689814248, 0.31752017969  
2537, 0.750848929887146, NA  
"18590", "STAU2-  
AS1", 0.167182390659274, 0.576034712544328, 3.34068880739852, 0.1724299226  
16139, 0.863099549623161, NA  
"18591", "AC022868.2", 1.85263092473207, -0.0562297585225869, 1.2176520411  
1703, -0.046178839786614, 0.963167707883382, NA  
"18592", "AC087627.1", 1.40155582473568, -1.2208977559431, 1.2456581105430  
1, -0.980122672192038, 0.327025568972766, NA  
"18593", "JPH1", 0.3088471509732, -0.151783800255383, 2.666328088474, -0.05  
69261528284959, 0.954604021144224, NA  
"18594", "AC022274.1", 0, NA, NA, NA, NA, NA  
"18595", "HNF4G", 0.899283037875567, 0.975246702398033, 1.76218138913508, 0  
.553431507341423, 0.579967969116143, NA  
"18596", "LINC01111", 0.283277640696212, 0.104018403410582, 2.735628775084  
45, 0.0380235814003566, 0.969668880382376, NA  
"18597", "AC023200.1", 0.287785067625315, -0.774666036310719, 3.1203959310  
9626, -0.248258891953677, 0.803934102976972, NA

"18598", "AC084706.1", 0, NA, NA, NA, NA, NA  
"18599", "PKIA-  
AS1", 0.802673177135832, 0.499457155232351, 1.94344985827132, 0.2569951332  
19755, 0.797182530059398, NA  
"18600", "AC068700.1", 0.557891747645251, 1.05425241169193, 2.036277593951  
7, 0.517735113730735, 0.604643095508385, NA  
"18601", "AC068700.2", 0.203054089861245, -1.95461545718866, 3.33573296423  
696, -0.585962808817275, 0.557900507779092, NA  
"18602", "LINC02605", 1.99151165376776, -1.73940253156478, 1.1786181549107  
, -1.47579818308209, 0.139998078662356, NA  
"18603", "STMN2", 0.765826476511217, 0.146053149236383, 2.13807805601459, 0  
.0683104851226194, 0.945538477706483, NA  
"18604", "HEY1", 1.42620259891374, -0.749952000159553, 1.34677327960338, -0  
.556850964833824, 0.577629259514813, NA  
"18605", "LINC01607", 0.142120095111522, -0.0533240139618842, 3.3524751975  
3738, -0.0159058638229611, 0.987309491940711, NA  
"18606", "AC009686.2", 0.298268617912268, 1.11711823327978, 2.679020476598  
25, 0.416987568045118, 0.676687501005877, NA  
"18607", "TPD52", 2.14256039634061, -0.378981966156351, 1.22234441547123, -  
0.310045156961959, 0.756526616862252, NA  
"18608", "AC009686.1", 0, NA, NA, NA, NA, NA  
"18609", "AC009812.3", 0.746869369110734, 1.40536269027858, 1.786794052026  
98, 0.786527517642176, 0.431558504340586, NA  
"18610", "AC012533.1", 0.100823152638361, -1.35173207482145, 3.35247519753  
738, -0.40320419844251, 0.686798011343181, NA  
"18611", "AC022778.1", 0, NA, NA, NA, NA, NA  
"18612", "AC079209.1", 0, NA, NA, NA, NA, NA  
"18613", "SLC10A5", 0.22202748838264, -0.774663427007578, 3.35247519753738  
, -0.231072082972193, 0.817258802814835, NA  
"18614", "CHMP4C", 0, NA, NA, NA, NA, NA  
"18615", "LINC02235", 0.11921983002294, -0.0533240139618846, 3.35247519753  
738, -0.0159058638229612, 0.987309491940711, NA  
"18616", "AC011773.4", 0.81230695156446, -0.882966836803124, 1.47967125386  
809, -0.596731763555529, 0.550686482173294, NA  
"18617", "AC011773.3", 1.02498712469971, -1.3694638739482, 1.4770784846479  
, -0.927143606911753, 0.353851977772167, NA  
"18618", "CA3", 0.979413097061347, -3.80519962057835, 1.67890035704369, -2.  
26648329938935, 0.0234218085430534, NA  
"18619", "CA3-  
AS1", 0.388754544244317, -0.996605359492112, 2.22763513584566, -0.44738267  
2079187, 0.654598784815931, NA  
"18620", "CA2", 1.3664249615457, -0.570040710093446, 1.46138265521196, -0.3  
90069437364963, 0.69648520179103, NA  
"18621", "ATP6V0D2", 0, NA, NA, NA, NA, NA  
"18622", "AC103760.1", 1.06851428138901, -1.5731907424227, 1.4872162328711  
2, -1.05780901771467, 0.2901425207586, NA  
"18623", "AC090578.2", 0.542503019245712, -1.0543665814185, 2.683989448519  
7, -0.392835591063897, 0.694440915675335, NA  
"18624", "CALB1", 0, NA, NA, NA, NA, NA  
"18625", "AC004083.1", 0.313540715310845, 1.26351236233866, 2.597736835073

7,0.486389670146404,0.62669091310095,NA  
"18626","LINC00534",0.725213315538273,0.336694039526717,1.771841896811  
43,0.190024877576619,0.849289636210347,NA  
"18627","LINC01030",0.271251509622856,-0.774665352300728,3.18287089738  
686,-0.243385728568736,0.8077065984266,NA  
"18628","AC106038.1",0.117958369419058,0.451348601316665,3.34428110054  
629,0.134961322851401,0.892642454377335,NA  
"18629","AC103770.1",0.361521066841708,1.49138941530967,2.965156963716  
08,0.502971489725318,0.614984317080534,NA  
"18630","AC104211.2",0,NA,NA,NA,NA,NA  
"18631","C8orf87",0.156148522800746,0.494635591052761,3.34300496985029  
,0.147961368742719,0.882373255878367,NA  
"18632","AC010834.3",0.106924501560529,0.385965786494404,3.34626872025  
989,0.115342137395477,0.908173940404949,NA  
"18633","AC010834.2",0.271251509622856,-0.774665352300728,3.1828708973  
8686,-0.243385728568736,0.8077065984266,NA  
"18634","MIR378D2HG",0.796017674017948,-1.25881321057968,2.13819496427  
603,-0.588727048567297,0.556044390078605,NA  
"18635","AC023632.5",0,NA,NA,NA,NA,NA  
"18636","AP003692.1",0.242943247749883,-0.774663951729422,3.3071134315  
1841,-0.234241724020258,0.814797324817481,NA  
"18637","AC087752.4",1.09653780642699,0.307940418324135,1.696441056385  
93,0.181521436990075,0.855958308359255,NA  
"18638","AC087752.3",0.156148522800746,0.494635591052761,3.34300496985  
029,0.147961368742719,0.882373255878367,NA  
"18639","C8orf37-  
AS1",1.02216605679429,0.864019168156262,1.62067559445373,0.53312283538  
6121,0.593948552653042,NA  
"18640","AC083836.1",0,NA,NA,NA,NA,NA  
"18641","AP003465.1",0.710769366479353,0.619936314019498,1.92902054588  
267,0.321373619033089,0.747927272610572,NA  
"18642","AP002982.2",0.0644961186387932,-0.0533240139618838,3.35247519  
753738,-0.015905863822961,0.987309491940711,NA  
"18643","AP003352.1",0.843050298618112,1.77031371389637,1.596170199059  
53,1.1091008433433,0.267386681133938,NA  
"18644","ERICH5",0.324137039266305,-0.0524131773797337,2.6534922959424  
2,-0.0197525266833754,0.984240788704199,NA  
"18645","AP003355.2",0.845238732642522,2.74370740568119,2.031044089216  
23,1.35088520246745,0.176732209069603,NA  
"18646","AC016877.1",1.77735801592972,2.97173270898535,1.3380611248750  
9,2.22092448075777,0.026356076812169,NA  
"18647","AC107909.1",0.304332577297202,-1.37410761592356,3.09443671322  
021,-0.444057430566612,0.657001062693595,NA  
"18648","FBX043",1.31830396685727,0.170579749181531,1.32053153415184,0  
.129175066834804,0.897219124680954,NA  
"18649","AP003472.1",0.100823152638361,-1.35173207482145,3.35247519753  
738,-0.40320419844251,0.686798011343181,NA  
"18650","AP003472.2",0.0534622507802646,-0.0533240139618838,3.35247519  
753738,-0.015905863822961,0.987309491940711,NA  
"18651","AP000424.1",0.142120095111522,-0.0533240139618842,3.352475197

53738,-0.0159058638229611,0.987309491940711,NA  
"18652","AP001330.1",0.193488355916379,0.860398995964988,3.33340328940  
337,0.258114281791264,0.796318709677277,NA  
"18653","GRHL2",0.100823152638361,-1.35173207482145,3.35247519753738,-  
0.40320419844251,0.686798011343181,NA  
"18654","AP002907.1",0.23843966004588,0.69583062743856,3.3374714942975  
1,0.208490358233014,0.834846110249776,NA  
"18655","AP002852.1",0.643898137682632,1.27366819238744,2.012526244208  
76,0.632870351903507,0.526818310247142,NA  
"18656","AP002851.1",1.28311275433815,-0.0888413945273329,1.3799125983  
3647,-0.0643818997191808,0.948666142054603,NA  
"18657","AP003354.1",0.32883060360395,1.37704104152891,2.5806918274876  
6,0.533593754535765,0.593622630184078,NA  
"18658","AC012213.3",0.219614265997676,-1.35173207482145,3.35247519753  
738,-0.40320419844251,0.686798011343181,NA  
"18659","AC012213.2",0,NA,NA,NA,NA,NA  
"18660","RIMS2",0.0534622507802646,-0.0533240139618838,3.3524751975373  
8,-0.015905863822961,0.987309491940711,NA  
"18661","DPYS",1.95150162570646,3.0670054553451,1.48299772065363,2.068  
11204941928,0.0386294879107953,NA  
"18662","DCSTAMP",0.221450767245824,-0.774663427007578,3.3524751975373  
8,-0.231072082972194,0.817258802814834,NA  
"18663","AP003471.1",0.102686272020481,-0.0533240139618846,3.352475197  
53738,-0.0159058638229612,0.987309491940711,NA  
"18664","ZFPM2-  
AS1",0.949912472999985,-1.04754844821872,1.65674377461185,-0.632293577  
481014,0.527195059520651,NA  
"18665","AC103853.1",0.405622050705154,1.62413286989577,2.472764409901  
61,0.656808575613716,0.511304009430585,NA  
"18666","AC103853.2",1.31593053719189,0.0294668794637447,1.27679896677  
098,0.0230787149979188,0.981587484135277,NA  
"18667","AC090802.1",0.441949084704722,0.631648184503036,2.48013843998  
428,0.254682631549809,0.798968232005048,NA  
"18668","AC090579.1",0.771863074364063,-1.39599403016282,1.71471261226  
026,-0.81412711388568,0.415572134482713,NA  
"18669","AP000428.2",0.360670746575654,1.53229383090349,2.952309297487  
28,0.519015345786307,0.603750039952214,NA  
"18670","PKHD1L1",0,NA,NA,NA,NA,NA  
"18671","AC090994.1",0.324137039266305,-0.0524131773797337,2.653492295  
94242,-0.0197525266833754,0.984240788704199,NA  
"18672","RAD21-  
AS1",1.71592086473943,-2.02395261868787,1.22807039261158,-1.6480754123  
4163,0.099337197117889,NA  
"18673","AARD",0.102230937222884,-1.35173207482145,3.35247519753738,-0  
.403204198442509,0.686798011343181,NA  
"18674","AC023590.1",0.713893946465355,1.44714874641479,1.785488853006  
06,0.810505618099132,0.417649637423829,NA  
"18675","SAMD12-AS1",0,NA,NA,NA,NA,NA  
"18676","AC021733.4",1.87861650618941,0.824604961016545,1.249052226480  
16,0.660184533148216,0.509135416538633,NA

"18677","AP005717.1",0.918663559227617,0.0686947191390916,1.51603262415531,0.0453121641609569,0.963858491799645,NA  
"18678","AC104958.1",0.221906102043421,0.695830468846429,3.33747149841039,0.208490310457437,0.834846147549618,NA  
"18679","AC104958.2",1.18496603152005,1.34809949564659,1.52583928387348,0.883513427590044,0.376958930887592,NA  
"18680","AC037486.1",0.102686272020481,-0.0533240139618846,3.35247519753738,-0.0159058638229612,0.987309491940711,NA  
"18681","AC104316.2",0.377720676385789,-1.06567859048806,2.53446344838133,-0.420475028420187,0.674138468023934,NA  
"18682","AC068228.3",1.93386794165573,-1.54277764725368,1.11545925811223,-1.38308740192325,0.166638068060338,NA  
"18683","FAM83A",0,NA,NA,NA,NA,NA  
"18684","FAM83A-AS1",0,NA,NA,NA,NA,NA  
"18685","FER1L6",0.102686272020481,-0.0533240139618846,3.35247519753738,-0.0159058638229612,0.987309491940711,NA  
"18686","AC090921.1",0.61141395490385,2.32077891029384,2.22379760157287,1.04361067241568,0.296665553166926,NA  
"18687","AC090192.2",0.0644961186387932,-0.0533240139618838,3.35247519753738,-0.015905863822961,0.987309491940711,NA  
"18688","AC100858.3",1.66046945520301,-0.252131488606368,1.75249589132829,-0.143869945632379,0.885603168657429,NA  
"18689","LINC00964",0.142120095111522,-0.0533240139618842,3.35247519753738,-0.0159058638229611,0.987309491940711,NA  
"18690","AC016074.2",0.0644961186387932,-0.0533240139618838,3.35247519753738,-0.015905863822961,0.987309491940711,NA  
"18691","LINC00861",2.2980342794142,0.122601497389039,0.991111240800033,0.123701046201509,0.901551983275332,NA  
"18692","CASC19",0.897419918493447,0.280061972701895,1.74421385849267,0.160566304033338,0.872434995967035,NA  
"18693","PRNCR1",2.2829857089614,1.58277074628498,1.10781087483654,1.42873732532959,0.153079745474588,NA  
"18694","CASC8",0,NA,NA,NA,NA,NA  
"18695","POU5F1B",1.61214968374477,-0.307934546275081,1.15617476948242,-0.266339098900189,0.789978063624236,NA  
"18696","AC108925.1",0.468445568402237,1.8862463767608,2.70672906570788,0.696872989859994,0.485882282545796,NA  
"18697","CASC11",1.07228033358116,0.308750992639238,1.48000244437027,0.208615191017884,0.834748650776045,NA  
"18698","CCDC26",0.332046327138831,-0.817664541082363,2.62197651324017,-0.311850444484689,0.755154185163877,NA  
"18699","GSDMC",0,NA,NA,NA,NA,NA  
"18700","AC022973.4",0.102230937222884,-1.35173207482145,3.35247519753738,-0.403204198442509,0.686798011343181,NA  
"18701","AC022973.3",0.505305129078851,-0.327272313349333,2.07081210823154,-0.158040563916164,0.874424834968637,NA  
"18702","AC131568.1",0.102230937222884,-1.35173207482145,3.35247519753738,-0.403204198442509,0.686798011343181,NA  
"18703","AC009682.1",0,NA,NA,NA,NA,NA  
"18704","KCNQ3",0.400954889932749,1.59850620341007,2.47658740299608,0.

645447118674776,0.518637476998728,NA  
"18705","AF228727.1",0.23843966004588,0.69583062743856,3.3374714942975  
1,0.208490358233014,0.834846110249776,NA  
"18706","AF230666.2",1.06967635747873,-0.954951767188382,1.34765169177  
439,-0.708604287752601,0.478570074755367,NA  
"18707","AF230666.1",0.204461874445769,-1.96013641505178,3.33548947920  
397,-0.587660799793491,0.556759992345141,NA  
"18708","TG",0.822601411449859,-0.993142988420273,2.10409017176955,-0.  
472005906279688,0.636922572823009,NA  
"18709","AF305872.2",1.09475261269981,1.37746476151298,1.5395178699865  
7,0.894737754180795,0.370927291597321,NA  
"18710","AC110741.1",0,NA,NA,NA,NA,NA  
"18711","AC105180.2",2.02579382967665,-0.866063670268242,1.15955819500  
666,-0.746891077996535,0.455129311967014,NA  
"18712","AC105180.1",0.102686272020481,-0.0533240139618846,3.352475197  
53738,-0.0159058638229612,0.987309491940711,NA  
"18713","AC083843.2",0.32333091346002,1.36964301339487,2.5925225082001  
9,0.52830515803148,0.597287552165004,NA  
"18714","LINC02055",1.07295258730261,0.536467042530462,1.5217324699153  
4,0.352537028115268,0.724435554153139,NA  
"18715","FAM135B",0.201646305276721,-1.9490730241217,3.3359781915796,-  
0.584258323103367,0.559046527482917,NA  
"18716","KCNK9",0.242943247749883,-0.774663951729422,3.30711343151841,  
-0.234241724020258,0.814797324817481,NA  
"18717","PEG13",1.50230836972641,-0.0345563276716,1.28518768711494,-0.  
0268881565066765,0.978548939842088,NA  
"18718","ERICD",1.72836985589809,0.937353033117682,1.23519810983514,0.  
758868577966648,0.44793117723367,NA  
"18719","AC011676.2",0.339262812684241,-0.0349910483728248,3.044545146  
73679,-0.0114930298899752,0.990830090769536,NA  
"18720","GPR20",0.0534622507802646,-0.0533240139618838,3.3524751975373  
8,-0.015905863822961,0.987309491940711,NA  
"18721","AC100803.4",0.204461874445769,-1.96013641505178,3.33548947920  
397,-0.587660799793491,0.556759992345141,NA  
"18722","AC103758.1",0.226144331583469,0.885845475851209,3.33280882803  
988,0.265795466094045,0.790396735192843,NA  
"18723","ADGRB1",1.36969224885987,1.54716599335156,1.38728113202527,1.  
11525051241263,0.264743085635015,NA  
"18724","PSCA",0.303877242499606,-2.34617912601169,3.02976049563007,-0.  
774377753421653,0.438707435439005,NA  
"18725","LNCOC1",0.529345468432097,0.918054476757235,1.9323032625143,0.  
475108899605474,0.634709355489767,NA  
"18726","LYPD2",0.546164527648945,-0.36512971446497,1.90808703712791,-  
0.191359045662074,0.848244303932175,NA  
"18727","GML",0,NA,NA,NA,NA,NA  
"18728","GPIHBP1",0.987285292753608,-3.27788880090693,1.74505866216953  
,-1.87838315809494,0.0603287678142858,NA  
"18729","RHPN1-  
AS1",0.128992237277586,0.513744972953418,3.34245151459318,0.1537030442  
20807,0.877843884367224,NA



"18730", "RHPN1", 0.762077492523803, -1.38468116405701, 1.59851634718159, -0.866228966940749, 0.386364611155416, NA  
"18731", "AC105118.1", 0, NA, NA, NA, NA, NA  
"18732", "MAFA", 1.09311449932876, 1.43232999418394, 1.61934105878584, 0.884514096899321, 0.376418756062847, NA  
"18733", "MAPK15", 0.273076516777941, -0.774665331385065, 3.18476194606587, -0.243241204367569, 0.807818548712931, NA  
"18734", "FAM83H", 0.374474710060568, -0.540119686521348, 2.25196254073756, -0.239843992406929, 0.810451201138416, NA  
"18735", "EPPK1", 0, NA, NA, NA, NA, NA  
"18736", "AC109322.2", 0.603297836761688, -0.923439327873191, 1.83353845992025, -0.50363782819879, 0.614515904915175, NA  
"18737", "WDR97", 0.963624413286362, -0.9742927714841, 1.53638710878611, -0.634145369947735, 0.525985956013579, NA  
"18738", "TMEM249", 0.203509424658842, -0.774663427007579, 3.35247519753738, -0.231072082972194, 0.817258802814834, NA  
"18739", "AC233992.3", 1.17067631216512, 0.0669959580998696, 1.37290459328472, 0.0487986990702534, 0.961079718932675, NA  
"18740", "FOXH1", 0, NA, NA, NA, NA, NA  
"18741", "AC084125.2", 0.426230479747991, -0.155329733446175, 2.44221910563302, -0.0636018828482279, 0.94928723248374, NA  
"18742", "GPT", 0.606088468289312, -2.45524337604939, 2.16450084818733, -1.1343231295592, 0.256659030508612, NA  
"18743", "AF186192.1", 1.03558272596537, -0.942805962356607, 1.42043142182124, -0.663746202648607, 0.506852762833348, NA  
"18744", "AF235103.3", 1.76924150493675, 0.600354462850662, 1.22558199641533, 0.489852547284981, 0.624238243793189, NA  
"18745", "ZNF252P-AS1", 1.79087961353093, -1.15325737870309, 1.26296615908001, -0.913134030086098, 0.361172054613544, NA  
"18746", "AL928970.1", 0.439933378226193, 0.432850802032095, 2.47632299782881, 0.174795776807633, 0.861240106870595, NA  
"18747", "PGM5P3-AS1", 0.463132554391825, -0.391143749145982, 1.95409588822753, -0.200166098041776, 0.841350680428588, NA  
"18748", "FOX D4", 0.0644961186387932, -0.0533240139618838, 3.35247519753738, -0.015905863822961, 0.987309491940711, NA  
"18749", "AL158832.2", 0, NA, NA, NA, NA, NA  
"18750", "AL161725.1", 0, NA, NA, NA, NA, NA  
"18751", "AL161725.2", 0.303877242499606, -2.34617912601169, 3.02976049563007, -0.774377753421653, 0.438707435439005, NA  
"18752", "AL392089.1", 1.44979639398293, 1.82576694890023, 1.42580845994415, 1.28051347722523, 0.20036460794825, NA  
"18753", "AL136979.1", 0.40309912949739, 1.72246360344407, 2.38566401784184, 0.722005944911837, 0.470290822507867, NA  
"18754", "AL358976.2", 1.02966487599234, 0.734983993842075, 1.80381857339014, 0.407460043201978, 0.683670135192057, NA  
"18755", "AL359076.1", 0.102686272020481, -0.0533240139618846, 3.35247519753738, -0.0159058638229612, 0.987309491940711, NA  
"18756", "VLDLR-

AS1",1.66933048213465,1.72710953956834,1.58338614461543,1.090769642921  
07,0.275374257378382,NA  
"18757","KCNV2",0,NA,NA,NA,NA,NA  
"18758","LINC01231",0.166727055861678,-0.774663427007578,3.35247519753  
738,-0.231072082972193,0.817258802814835,NA  
"18759","AL354977.2",1.45356334842475,0.402262945181448,1.233257396552  
9,0.32617922771501,0.744288756593166,NA  
"18760","GLIS3-  
AS1",0.154285403418625,-0.774663427007578,3.35247519753738,-0.23107208  
2972193,0.817258802814835,NA  
"18761","AL359095.1",0.553979047316224,0.690259803655213,2.28750805723  
943,0.301751856773007,0.762841233732517,NA  
"18762","SPATA6L",1.43184573205302,-1.18506068578644,1.23396180935071,  
-0.960370634493141,0.33686871197401,NA  
"18763","AL353151.2",0.432760545333785,1.73130171289812,2.111229148753  
48,0.820044434267269,0.412190776869637,NA  
"18764","IGHEP2",0.128992237277586,0.513744972953418,3.34245151459318,  
0.153703044220807,0.877843884367224,NA  
"18765","INSL6",1.80705648910162,0.0559029038828019,1.17735104862013,0  
.0474819332333552,0.962129129284594,NA  
"18766","RLN2",0.167182390659274,0.576034712544328,3.34068880739852,0.  
172429922616139,0.863099549623161,NA  
"18767","RLN1",0.270796174825259,-2.10201442494854,3.17084321545501,-0  
.662919697417743,0.507381985665671,NA  
"18768","AL135786.2",0.168565237602375,-1.35173207482145,3.35247519753  
738,-0.40320419844251,0.686798011343181,NA  
"18769","AL136980.1",0.960029814685003,2.00085948825108,1.816570918396  
71,1.10144859635704,0.270701464968841,NA  
"18770","MLANA",0.221906102043421,0.695830468846429,3.33747149841039,0  
.208490310457437,0.834846147549618,NA  
"18771","GLDC",0.338834096020616,-0.774667674034573,2.96546850953071,-  
0.261229438635032,0.793915577320881,NA  
"18772","AL354707.1",0.334364781318548,1.40513136139298,2.996844298340  
15,0.468870325419052,0.639162328433279,NA  
"18773","AL161443.1",0.324592374063902,1.32629053141379,3.073475522149  
63,0.431527930466861,0.666084548480396,NA  
"18774","AL354694.1",0,NA,NA,NA,NA,NA  
"18775","AL583805.2",0.0644961186387932,-0.0533240139618838,3.35247519  
753738,-0.015905863822961,0.987309491940711,NA  
"18776","LURAP1L-  
AS1",0.951211537709833,0.421624800838426,1.92671421241717,0.2188310015  
67936,0.826781696344607,NA  
"18777","AL161449.2",0.102686272020481,-0.0533240139618846,3.352475197  
53738,-0.0159058638229612,0.987309491940711,NA  
"18778","AL162386.2",0.963624413286362,-0.9742927714841,1.536387108786  
11,-0.634145369947735,0.525985956013579,NA  
"18779","AL159169.3",0.305740361881726,-1.38485840137887,2.64966120810  
703,-0.52265489532839,0.601214431685811,NA  
"18780","CER1",1.04079467496907,2.15439168785349,1.58092796517883,1.36  
273867962718,0.172964882924416,NA

"18781", "AL512643.2", 0.102686272020481, -0.0533240139618846, 3.35247519753738, -0.0159058638229612, 0.987309491940711, NA  
"18782", "AL512643.1", 0, NA, NA, NA, NA, NA  
"18783", "AL161909.2", 0.205372544040962, 0.695830627438559, 3.33747149429751, 0.208490358233014, 0.834846110249776, NA  
"18784", "AL391834.3", 0.0534622507802646, -0.0533240139618838, 3.35247519753738, -0.015905863822961, 0.987309491940711, NA  
"18785", "SLC24A2", 0.224882870979587, 1.01003906181063, 3.32983728260984, 0.303329855511435, 0.7616384958927, NA  
"18786", "FOCAD-AS1", 0.464420633129679, -0.0665423382788266, 2.42075632614887, -0.0274882430586012, 0.978070316985615, NA  
"18787", "AL359922.2", 0.167182390659274, 0.576034712544328, 3.34068880739852, 0.172429922616139, 0.863099549623161, NA  
"18788", "DMRTA1", 1.72069067423946, -0.049799119085012, 1.16210431541487, -0.042852537783782, 0.965819083328509, NA  
"18789", "AC017067.1", 0.271251509622856, -0.774665352300728, 3.18287089738686, -0.243385728568736, 0.8077065984266, NA  
"18790", "ELAVL2", 0.220042982661301, -0.774663427007579, 3.35247519753738, -0.231072082972194, 0.817258802814834, NA  
"18791", "LRRC19", 0.11921983002294, -0.0533240139618846, 3.35247519753738, -0.0159058638229612, 0.987309491940711, NA  
"18792", "EQTN", 0.296405498530148, -0.22601836373236, 2.68538977137194, -0.0841659434849525, 0.932924495242752, NA  
"18793", "AL451123.1", 0.885141839118797, 0.995894570466438, 1.94996770136802, 0.510723623661949, 0.609544596390008, NA  
"18794", "AL360014.1", 0.454417140713014, 1.80077312122846, 2.35936521947133, 0.763244751752325, 0.445317444238798, NA  
"18795", "TAF1L", 0, NA, NA, NA, NA, NA  
"18796", "TMEM215", 0, NA, NA, NA, NA, NA  
"18797", "ANKRD18B", 0.102686272020481, -0.0533240139618846, 3.35247519753738, -0.0159058638229612, 0.987309491940711, NA  
"18798", "PTENP1-AS", 0.244351032334407, -0.774664026145693, 3.30062972833046, -0.234701887187309, 0.814440122883676, NA  
"18799", "AL356489.2", 0, NA, NA, NA, NA, NA  
"18800", "LINC01251", 0, NA, NA, NA, NA, NA  
"18801", "UBE2R2-AS1", 0.747407053903465, -0.597458383738009, 1.74622914853626, -0.342142028861915, 0.732244009486475, NA  
"18802", "KIF24", 0.882783032786203, 1.04714379927435, 1.52716657460736, 0.685677526397912, 0.492916481564648, NA  
"18803", "C9orf24", 2.12725109320553, -0.343506464867116, 1.13535307668735, -0.302554748756549, 0.762229204221158, NA  
"18804", "ARID3C", 0, NA, NA, NA, NA, NA  
"18805", "CCL21", 0.100823152638361, -1.35173207482145, 3.35247519753738, -0.40320419844251, 0.686798011343181, NA  
"18806", "AL589645.1", 0.263073024361275, 1.1485336607599, 3.23397067510699, 0.355146591031441, 0.722479774079932, NA  
"18807", "PHF24", 1.69247356743811, 1.57826534284859, 1.41849561242155, 1.1

1263322144105,0.265865986367814,NA  
"18808","DNAJB5-  
DT",0.0644961186387932,-0.0533240139618838,3.35247519753738,-0.0159058  
63822961,0.987309491940711,NA  
"18809","AL355377.4",0.275368352823686,1.11865680170283,2.739778946225  
96,0.408301846119294,0.683052084109357,NA  
"18810","C9orf131",0.11921983002294,-0.0533240139618846,3.352475197537  
38,-0.0159058638229612,0.987309491940711,NA  
"18811","AL353795.2",0,NA,NA,NA,NA,NA  
"18812","AL133476.1",0.939015772043658,0.386023016624006,1.55638492541  
074,0.248025414742521,0.804114742932944,NA  
"18813","FAM166B",0.520997149587308,0.0654282078741273,2.3463691773174  
1,0.0278848735768558,0.97775397289014,NA  
"18814","AL357874.1",0,NA,NA,NA,NA,NA  
"18815","ARHGEF39",0.703556720159044,0.280373298578084,1.6591551138581  
8,0.168985585637082,0.865807979337706,NA  
"18816","CA9",0.296405498530148,-0.22601836373236,2.68538977137194,-0.  
0841659434849525,0.932924495242752,NA  
"18817","MSMP",0.11921983002294,-0.0533240139618846,3.35247519753738,-  
0.0159058638229612,0.987309491940711,NA  
"18818","AL133410.1",0.102230937222884,-1.35173207482145,3.35247519753  
738,-0.403204198442509,0.686798011343181,NA  
"18819","FAM221B",0.100823152638361,-1.35173207482145,3.35247519753738  
, -0.40320419844251,0.686798011343181,NA  
"18820","MELK",0.100823152638361,-1.35173207482145,3.35247519753738,-0  
.40320419844251,0.686798011343181,NA  
"18821","PAX5",0.11921983002294,-0.0533240139618846,3.35247519753738,-  
0.0159058638229612,0.987309491940711,NA  
"18822","AL161781.2",0,NA,NA,NA,NA,NA  
"18823","AL512604.2",0.322273919884185,-1.38549380438952,2.60912169626  
995,-0.531019233932344,0.595405450737739,NA  
"18824","ANKRD18A",0.0644961186387932,-0.0533240139618838,3.3524751975  
3738,-0.015905863822961,0.987309491940711,NA  
"18825","FAM201A",0,NA,NA,NA,NA,NA  
"18826","CNTNAP3",0.166727055861678,-0.774663427007578,3.3524751975373  
8,-0.231072082972193,0.817258802814835,NA  
"18827","BX664727.3",1.02882157521756,-0.817870780312024,1.39631783356  
583,-0.585733964468103,0.558054306009987,NA  
"18828","BMS1P14",0.409860280245202,1.68104076199313,2.40560406461791,  
0.69880192951043,0.484675822540987,NA  
"18829","BX255923.2",0.142120095111522,-0.0533240139618842,3.352475197  
53738,-0.0159058638229611,0.987309491940711,NA  
"18830","AL845472.1",0.307603481263847,-0.0321837065735757,3.123618821  
83901,-0.0103033399429408,0.991779269585558,NA  
"18831","AL591926.2",1.94754372496457,1.23393215311957,1.3078411186998  
6,0.94348781016018,0.345431447451621,NA  
"18832","CNTNAP3B",0.700535218038132,2.4832764099172,1.87822345461472,  
1.32214109232631,0.186121172519777,NA  
"18833","BX088651.4",2.30267226742908,0.872404030227329,1.026866314028  
66,0.849578974700869,0.395559205467944,NA

"18834","BX005040.1",0,NA,NA,NA,NA,NA  
"18835","AL935212.1",0,NA,NA,NA,NA,NA  
"18836","BX005266.2",1.62013599630035,0.632721477634453,1.176149309935  
29,0.53796016567766,0.590604549699397,NA  
"18837","CR786580.1",0.322300538018157,-0.774667165166207,3.0144598883  
595,-0.256983736342828,0.797191328075268,NA  
"18838","ANKRD20A4",0.746832013259199,-1.63605849816337,2.163633571790  
38,-0.756162466461244,0.449551793308002,NA  
"18839","FP326651.1",0.102686272020481,-0.0533240139618846,3.352475197  
53738,-0.0159058638229612,0.987309491940711,NA  
"18840","ANKRD20A3",0.380559755157402,1.49425147940121,2.9526975908447  
5,0.506063162050306,0.612812310059885,NA  
"18841","FAM27E3",0.284685425280735,0.104122352415883,2.73164482693201  
,0.0381170902561391,0.969594325157982,NA  
"18842","AL627230.1",0.102686272020481,-0.0533240139618846,3.352475197  
53738,-0.0159058638229612,0.987309491940711,NA  
"18843","ANKRD20A1",1.86146678792863,-0.532815942083241,1.154727174579  
4,-0.461421497486899,0.644496231066905,NA  
"18844","AL161457.1",0.656339790125684,1.30296332396896,2.009540104227  
57,0.648388813553834,0.516733503695291,NA  
"18845","LINC01506",0.102686272020481,-0.0533240139618846,3.3524751975  
3738,-0.0159058638229612,0.987309491940711,NA  
"18846","PIP5K1B",0.925156235276176,-0.646052844776524,1.5862162326818  
2,-0.407291787503802,0.683793693838512,NA  
"18847","FAM189A2",0.226144331583469,0.885845475851209,3.3328088280398  
8,0.265795466094045,0.790396735192843,NA  
"18848","AL162412.1",0.716740909814946,0.350916650259847,1.92099140500  
86,0.182674763325282,0.85505321848589,NA  
"18849","MAMDC2-  
AS1",2.11979440971021,1.47028713343798,1.24471460640521,1.181224295008  
67,0.237513632342841,NA  
"18850","TMC1",1.63672183276801,0.631970281208835,1.15642246226868,0.5  
4648737968046,0.584730960499018,NA  
"18851","LINC01474",2.09561062519771,1.73314125597255,1.20061652022452  
,1.44354273556759,0.148867642977985,NA  
"18852","TRPM6",0.220042982661301,-0.774663427007579,3.35247519753738,  
-0.231072082972194,0.817258802814834,NA  
"18853","AL158825.2",0.128992237277586,0.513744972953418,3.34245151459  
318,0.153703044220807,0.877843884367224,NA  
"18854","PCA3",0.766624732880807,-0.560492505448216,1.89528512133499,-  
0.295729913741643,0.767436350571406,NA  
"18855","PSAT1",1.08080960985143,-1.69495148545406,1.41093594833488,-1  
.2012958401509,0.229636463500836,NA  
"18856","AL591368.1",0.347037304354888,-0.0545756175730095,2.614005304  
4848,-0.0208781586936244,0.983342849664216,NA  
"18857","FRMD3",1.10655041963544,-0.652110616691712,1.58971845689987,-  
0.410205098809383,0.681655500906817,NA  
"18858","AL354733.1",0.11921983002294,-0.0533240139618846,3.3524751975  
3738,-0.0159058638229612,0.987309491940711,NA  
"18859","SLC28A3",0.439228531995352,-2.46728027436688,3.28084590987215

, -0.752025648916572, 0.452035634424039, NA  
"18860", "AL354897.1", 0.102686272020481, -0.0533240139618846, 3.352475197  
53738, -0.0159058638229612, 0.987309491940711, NA  
"18861", "AL583827.1", 0.941316257046773, 0.873198431589177, 1.54982993989  
63, 0.563415642652771, 0.573151887873212, NA  
"18862", "AL353743.2", 0.670503014016787, 0.567121051881956, 1.78238555010  
774, 0.318180907518957, 0.75034771439047, NA  
"18863", "C9orf153", 1.47105543844687, -0.163531820810824, 1.3359686966653  
4, -0.122406925565704, 0.902576753950172, NA  
"18864", "AL353613.1", 0.278345121759852, 1.24046499102498, 3.168350570686  
35, 0.391517593571176, 0.695414686671429, NA  
"18865", "AL513318.2", 1.02448758581971, 0.801673111970028, 1.576970694976  
59, 0.508362720070665, 0.611198992041425, NA  
"18866", "DAPK1-  
IT1", 0.81300051827097, -0.460602858668673, 1.62502081050054, -0.283444283  
108471, 0.776836286566318, NA  
"18867", "AL353572.4", 0.529235984178029, 0.835985855259262, 2.33653696965  
248, 0.357788413415774, 0.720501662129197, NA  
"18868", "NXNL2", 1.7655790481893, -1.12674970266181, 1.1297303942232, -0.9  
97361590361172, 0.318589028052649, NA  
"18869", "AL161910.1", 0.361065732044111, 0.3670708605405, 2.5774418553483  
5, 0.142416737657459, 0.886750842401241, NA  
"18870", "AL606807.1", 0, NA, NA, NA, NA  
"18871", "AL158071.4", 0.981849576595185, -0.889664259800149, 1.4923229924  
4355, -0.596160659793496, 0.551067903843806, NA  
"18872", "AL158071.3", 1.26052095565879, 2.4192934446329, 1.42858683578491  
, 1.69348714690044, 0.0903627793494165, NA  
"18873", "LINC00484", 1.31328985430128, 1.58113851836412, 1.33425497893141  
, 1.18503475222587, 0.236003706799069, NA  
"18874", "AL158071.5", 1.78429358433859, 0.207883016001236, 1.128925369796  
94, 0.184142390243766, 0.853901752428731, NA  
"18875", "AL353764.1", 0.573181635938357, 1.09682742959986, 1.864073794908  
47, 0.588403437994641, 0.556261530658705, NA  
"18876", "AL157827.2", 0, NA, NA, NA, NA  
"18877", "AL136981.3", 0.416226987331326, 1.69300301594221, 2.124245819761  
59, 0.796990160080541, 0.425456746099067, NA  
"18878", "LINC02603", 1.06969414837326, -1.02942272529833, 1.6101801922616  
9, -0.639321443802126, 0.522613841183264, NA  
"18879", "PCAT7", 0.443794413192313, 1.76500149983804, 2.10452362519749, 0.  
838670318881509, 0.401654338556417, NA  
"18880", "AL157936.1", 0.142120095111522, -0.0533240139618842, 3.352475197  
53738, -0.0159058638229611, 0.987309491940711, NA  
"18881", "AL807757.1", 0.11921983002294, -0.0533240139618846, 3.3524751975  
3738, -0.0159058638229612, 0.987309491940711, NA  
"18882", "AL807757.2", 0.376312891801265, -1.05915445348178, 2.53628384602  
384, -0.417600914480542, 0.676238928058225, NA  
"18883", "AL161729.4", 0.155693188003149, -0.774663427007578, 3.3524751975  
3738, -0.231072082972193, 0.817258802814835, NA  
"18884", "LINC00092", 0.272243772837683, 0.0571453309233634, 2.76250420872  
225, 0.0206860611263267, 0.983496088251948, NA

"18885", "ZNF367", 0.99808664741126, -1.19275459966951, 1.59043922891377, -0.749952955124306, 0.453283039199719, NA  
"18886", "AL133477.2", 2.33676905236774, -0.378829217867451, 1.02108621183998, -0.371006104552923, 0.710632984918424, NA  
"18887", "NUTM2G", 0.102686272020481, -0.0533240139618846, 3.35247519753738, -0.0159058638229612, 0.987309491940711, NA  
"18888", "CTSV", 0.359202612661991, -0.842638784440209, 2.2647614482912, -0.372065139609293, 0.709844350633511, NA  
"18889", "AL590705.1", 1.9241645255502, 1.42270882138309, 1.59365737178433, 0.892731930069866, 0.372000746828446, NA  
"18890", "AL512590.3", 0, NA, NA, NA, NA, NA  
"18891", "HEMGN", 0.323681704468709, -1.38551320655902, 3.03285912081125, -0.456834014165622, 0.647790355428191, NA  
"18892", "COR02A", 1.18125611772652, 0.310825925969637, 1.49495229395204, 0.207916953087473, 0.835293811778688, NA  
"18893", "AL807776.1", 1.00658089738589, -1.03723569886989, 1.70281489781052, -0.609130035333592, 0.542438250570243, NA  
"18894", "AL136084.2", 0.183715948661733, 0.576034712544328, 3.34068880739852, 0.172429922616139, 0.863099549623161, NA  
"18895", "AL136084.3", 0.270796174825259, -2.10201442494854, 3.17084321545501, -0.662919697417743, 0.507381985665671, NA  
"18896", "NAMA", 0.297813283114671, -0.22601258613788, 2.68166806192223, -0.0842805973442787, 0.932833338585223, NA  
"18897", "AL359710.1", 0, NA, NA, NA, NA, NA  
"18898", "ALDOB", 0.49083915748656, -1.97471909140065, 2.06099924310347, -0.958136737802533, 0.337993812366009, NA  
"18899", "TMEM246-AS1", 0.102230937222884, -1.35173207482145, 3.35247519753738, -0.403204198442509, 0.686798011343181, NA  
"18900", "GRIN3A", 1.6900802678521, 1.51923668199047, 1.4125903692329, 1.07549698417913, 0.282152281705977, NA  
"18901", "SMC2-AS1", 0.100823152638361, -1.35173207482145, 3.35247519753738, -0.40320419844251, 0.686798011343181, NA  
"18902", "AL359182.1", 1.33870440678154, 0.26962212169359, 1.22697730437323, 0.21974499506437, 0.826069760033264, NA  
"18903", "AL158070.1", 0.102686272020481, -0.0533240139618846, 3.35247519753738, -0.0159058638229612, 0.987309491940711, NA  
"18904", "TAL2", 0.633414587395679, -0.13414705520912, 1.89270126654514, -0.0708759789937621, 0.94349646127205, NA  
"18905", "LINC01505", 0.0644961186387932, -0.0533240139618838, 3.35247519753738, -0.015905863822961, 0.987309491940711, NA  
"18906", "AL807761.4", 0.11921983002294, -0.0533240139618846, 3.35247519753738, -0.0159058638229612, 0.987309491940711, NA  
"18907", "ACTL7B", 0, NA, NA, NA, NA, NA  
"18908", "FRRS1L", 0.992866601903402, 2.07456252510171, 1.85157214135314, 1.12043299786613, 0.262529289853662, NA  
"18909", "EPB41L4B", 1.26382891696094, -0.481439816522455, 1.25752964181401, -0.382845700422592, 0.701834174217225, NA  
"18910", "PTPN3", 1.3018582785676, -1.94582555662508, 1.4000967352243, -1.3

897793685758,0.164595884920604,NA  
"18911","AL592463.1",0.0534622507802646,-0.0533240139618838,3.35247519  
753738,-0.015905863822961,0.987309491940711,NA  
"18912","MUSK",2.34267846778803,-0.73017586962248,1.06907732909452,-0.  
682996308827275,0.494609174965217,NA  
"18913","AL135787.1",0.142120095111522,-0.0533240139618842,3.352475197  
53738,-0.015905863822961,0.987309491940711,NA  
"18914","SHOC1",0.324592374063902,1.32629053141379,3.07347552214963,0.  
431527930466861,0.666084548480396,NA  
"18915","C9orf147",0.356398029464938,1.46065628384533,2.53561769326684  
,0.57605540761291,0.564577731032049,NA  
"18916","SLC46A2",0.423552407320142,-0.668325171026037,2.4865868147820  
6,-0.268772104417602,0.788105061139787,NA  
"18917","AL139041.1",0.630332735945628,0.333852588937156,2.06879998275  
774,0.161374995997499,0.871798058852729,NA  
"18918","RNF183",1.43741726561916,0.353722004093578,1.36873595461366,0.  
.258429686822553,0.796075307759159,NA  
"18919","BSPRY",0.166727055861678,-0.774663427007578,3.35247519753738,  
-0.231072082972193,0.817258802814835,NA  
"18920","C9orf43",1.07962724727396,-0.350239315279787,1.75991664132169  
, -0.199009036596619,0.842255675799229,NA  
"18921","AMBP",0,NA,NA,NA,NA,NA  
"18922","ORM1",0,NA,NA,NA,NA,NA  
"18923","AL138895.1",1.05337995085344,2.058470406248,1.63207928466178,  
1.26125637742812,0.207216492394576,NA  
"18924","DEC1",0.0644961186387932,-0.0533240139618838,3.35247519753738  
, -0.015905863822961,0.987309491940711,NA  
"18925","TNFSF8",1.69574924176858,1.05755964480371,1.3135965203333,0.8  
05087124115835,0.420769405447537,NA  
"18926","PAPPA-  
AS1",0.857145696594184,0.504344605090717,1.64415916707509,0.3067492583  
38491,0.759034233293735,NA  
"18927","AL133284.1",0.102686272020481,-0.0533240139618846,3.352475197  
53738,-0.015905863822961,0.987309491940711,NA  
"18928","AL160272.1",1.32098097477096,-0.595648918617199,1.30072933807  
305,-0.45793456115906,0.646999455840587,NA  
"18929","BRINP1",0,NA,NA,NA,NA,NA  
"18930","B3GNT10",2.0437883955542,-0.116757397913951,1.07212113958262,  
-0.108903176705764,0.913279286986709,NA  
"18931","AL513122.2",1.79077382947262,0.163486432223989,1.162395387002  
75,0.140646146786199,0.888149490688656,NA  
"18932","MORN5",0.373899669416301,-1.51022017278091,2.51010698877835,-  
0.601655698156482,0.547403345189504,NA  
"18933","LHX6",0,NA,NA,NA,NA,NA  
"18934","AL162424.1",1.71217199854911,0.346133741373483,1.142157555997  
01,0.303052533826066,0.761849826622384,NA  
"18935","AL359636.2",0.0534622507802646,-0.0533240139618838,3.35247519  
753738,-0.015905863822961,0.987309491940711,NA  
"18936","OR1L8",0.659976360887494,0.329935526769786,1.86099454595432,0.  
.177289894528194,0.859280688060414,NA



"18937","AC007066.2",1.77031172441042,0.875232213292691,1.22199524754795,0.716232092595224,0.473848049827688,NA  
"18938","MIR600HG",0.488048525958936,-0.187009959778483,2.14782079279056,-0.0870696290892643,0.930616166155186,NA  
"18939","CRB2",0.423123690656518,-1.5087811068827,2.42380825144445,-0.622483691102033,0.533623864421988,NA  
"18940","NR6A1",2.28932897774048,1.33015462176833,1.12529058885749,1.1820543377323,0.237184140994897,NA  
"18941","MIR181A2HG",2.18311647203378,1.41037389395519,1.25225874379642,1.12626396177471,0.260053807078962,NA  
"18942","WDR38",0.102230937222884,-1.35173207482145,3.35247519753738,-0.403204198442509,0.686798011343181,NA  
"18943","AL354710.2",0.0534622507802646,-0.0533240139618838,3.35247519753738,-0.015905863822961,0.987309491940711,NA  
"18944","AL358074.1",0.440258907437215,0.231940583716098,2.16067209960437,0.107346498230142,0.914514097374778,NA  
"18945","AL356309.2",0.565587955819019,1.16955862432439,2.28897941358018,0.510952006551726,0.609384663455083,NA  
"18946","AL161908.1",1.80638053898904,-0.0677915128656534,1.38265911622505,-0.0490298093507955,0.960895540073804,NA  
"18947","CFAP157",0.67314732156377,-0.736214049381982,1.98227957089797,-0.371397687889443,0.71034134742346,NA  
"18948","TTC16",1.09015385025311,-0.288897135491552,1.59893456237872,-0.180681024908087,0.856617953573497,NA  
"18949","AL162586.2",0,NA,NA,NA,NA,NA  
"18950","AL162586.1",1.34572944976949,-0.126766545776313,1.3286148387198,-0.0954125620774036,0.923987138505076,NA  
"18951","AL157935.1",0.0534622507802646,-0.0533240139618838,3.35247519753738,-0.015905863822961,0.987309491940711,NA  
"18952","LCN2",0.0534622507802646,-0.0533240139618838,3.35247519753738,-0.015905863822961,0.987309491940711,NA  
"18953","AL356481.2",0.992257073688468,1.83655814665692,1.81112586839085,1.01404224781388,0.310562593474952,NA  
"18954","HMGA1P4",0.855336993264434,0.0979713632834449,1.54245632999023,0.0635164583778302,0.949355253815704,NA  
"18955","AL592211.1",2.05366624884742,-1.16916565745132,1.03705649827165,-1.12738858432481,0.259578223477722,NA  
"18956","AL592211.2",0.302506847452316,1.19722465046043,3.09053531551828,0.387384232255459,0.698471775165589,NA  
"18957","AL158151.4",1.7630651461897,1.39168257643421,1.30633272006247,1.06533546550657,0.286724149065381,NA  
"18958","AL161785.3",0,NA,NA,NA,NA,NA  
"18959","AL161785.1",0.555491699845901,0.732845614878474,2.35952603525546,0.310590179522698,0.756112193817959,NA  
"18960","C9orf106",1.04664701489631,1.04384506764233,1.58295237699501,0.659429230349881,0.509620176963513,NA  
"18961","AL353803.4",1.10122825422934,-0.336415124307608,1.46022890355416,-0.230385197477451,0.817792462520247,NA  
"18962","AL391056.2",0.273076516777941,-0.774665331385065,3.18476194606587,-0.243241204367569,0.807818548712931,NA

"18963", "AL391056.1", 0.340670597268764, -0.0351376964155961, 3.04056675106248, -0.0115562983129108, 0.990779613223969, NA  
"18964", "C9orf50", 1.16992278898028, -0.994373403865647, 1.31783682497031, -0.754549717403783, 0.45051920358049, NA  
"18965", "PRRX2-AS1", 0, NA, NA, NA, NA, NA  
"18966", "AL158207.2", 0.593096712843417, -2.2123327656555, 1.99914653977411, -1.10663861885056, 0.268450203345663, NA  
"18967", "AL136141.1", 0.660421595945185, -0.230575245931507, 1.73564211843481, -0.132847228977964, 0.894314202031914, NA  
"18968", "GPRACR", 0, NA, NA, NA, NA, NA  
"18969", "QRFP", 0.205372544040962, 0.695830627438559, 3.33747149429751, 0.208490358233014, 0.834846110249776, NA  
"18970", "FIBCD1", 0, NA, NA, NA, NA, NA  
"18971", "LAMC3", 2.20782545927635, 0.645342611116897, 1.39964446446481, 0.461076100039206, 0.644744008077912, NA  
"18972", "AL157938.2", 0.527646463925147, -0.0604133997871304, 2.12939642465267, -0.0283711379843162, 0.977366143483478, NA  
"18973", "AL358781.2", 0.716870929970254, 1.23020770306242, 1.74543983577078, 0.704812436298708, 0.480926968172151, NA  
"18974", "AL445645.1", 0.309302485770796, 1.17088912763199, 2.66183894910263, 0.439879778611974, 0.660024182340411, NA  
"18975", "CEL", 1.74239936411906, -0.778304813724762, 1.02115173724684, -0.762183312563495, 0.44595060431289, NA  
"18976", "ABO", 1.79601872342472, -0.665579942733379, 1.66227208862917, -0.40040372889992, 0.688859178199675, NA  
"18977", "DBH-AS1", 0.373482446845741, -1.51663267923001, 2.50304677550435, -0.605914637342093, 0.544571439100793, NA  
"18978", "LINC02247", 0, NA, NA, NA, NA, NA  
"18979", "AL645768.1", 0.410745088081924, 1.66416763505049, 3.3004354676269, 0.504226685046224, 0.614102090381297, NA  
"18980", "AL353611.1", 0.717706534187486, -0.727826031079763, 1.93165693398654, -0.376788454654669, 0.706330821343291, NA  
"18981", "KCNT1", 0, NA, NA, NA, NA, NA  
"18982", "LINC02846", 0.347492639152484, 1.36515954890128, 3.01727533496929, 0.452447787273339, 0.650946427429436, NA  
"18983", "AL138781.1", 0.204461874445769, -1.96013641505178, 3.33548947920397, -0.587660799793491, 0.556759992345141, NA  
"18984", "AC174065.1", 0.286523607021433, -0.265776410372375, 2.71200358897697, -0.0980000216270479, 0.921932276195533, NA  
"18985", "C9orf163", 0.156148522800746, 0.494635591052761, 3.34300496985029, 0.147961368742719, 0.882373255878367, NA  
"18986", "NALT1", 0.53107856765891, 1.09090652007517, 2.02416211295318, 0.538942268059535, 0.589926690684428, NA  
"18987", "AL590226.2", 0.248212067300526, 0.997943832444287, 3.29816976420681, 0.302575035182971, 0.762213742182461, NA  
"18988", "AL590226.1", 0, NA, NA, NA, NA, NA  
"18989", "DIPK1B", 0.675066172807052, -2.71851885851989, 2.06787518809822, -1.3146435888232, 0.188629713479768, NA  
"18990", "LCN10", 0, NA, NA, NA, NA, NA

"18991", "LCN6", 0, NA, NA, NA, NA, NA  
"18992", "CCDC183-  
AS1", 0.441289282879078, 1.8277949358887, 2.3111851711503, 0.7908474659254  
53, 0.429033007519185, NA  
"18993", "AL807752.5", 0.585021629603171, 0.103314177510346, 2.34540375582  
608, 0.0440496342063533, 0.964864839861725, NA  
"18994", "C8G", 1.06046749677529, -1.12305815575698, 1.36237817617592, -0.8  
2433657217654, 0.409748343700709, NA  
"18995", "LCN12", 0.320437418636037, -2.09332987365482, 3.0035528561136, -0  
.696951235399085, 0.485833312087704, NA  
"18996", "C9orf139", 0.6100589875095, -1.29372261370107, 2.02146567527162,  
-0.639992372626976, 0.522177558140115, NA  
"18997", "FUT7", 0.423698731300784, -0.390550425447594, 1.99069148816751, -  
0.196188323388627, 0.844462767051625, NA  
"18998", "SAPCD2", 0.100823152638361, -1.35173207482145, 3.35247519753738,  
-0.40320419844251, 0.686798011343181, NA  
"18999", "LRRC26", 0.244351032334407, -0.774664026145693, 3.30062972833046  
, -0.234701887187309, 0.814440122883676, NA  
"19000", "CYSRT1", 0.268005543297635, -0.150415693622294, 2.77274999608506  
, -0.0542478383679276, 0.956737707263394, NA  
"19001", "STPG3-  
AS1", 0.333884508879529, -1.5113465063233, 2.58424426686441, -0.5848311344  
6435, 0.558661267333854, NA  
"19002", "TOR4A", 0.734483448528844, -1.52812543014031, 1.83320436204534, -  
0.833581602672683, 0.404516796257924, NA  
"19003", "BX255925.1", 0.102686272020481, -0.0533240139618846, 3.352475197  
53738, -0.0159058638229612, 0.987309491940711, NA  
"19004", "ENTPD8", 0, NA, NA, NA, NA, NA  
"19005", "TUBB8", 0.182454488057851, 0.814003878402388, 3.33451052748657, 0  
.244114952312343, 0.80714179253596, NA  
"19006", "AL358216.1", 0.102686272020481, -0.0533240139618846, 3.352475197  
53738, -0.0159058638229612, 0.987309491940711, NA  
"19007", "AL359878.1", 0.747260729922823, -0.73115079211949, 1.79633154384  
443, -0.407024412962606, 0.683990057869398, NA  
"19008", "IDI2", 0.268005543297635, -0.150415693622294, 2.77274999608506, -  
0.0542478383679276, 0.956737707263394, NA  
"19009", "IDI2-  
AS1", 0.538852517522789, 2.09523131935775, 2.19822678480343, 0.95314611478  
7746, 0.340516043912866, NA  
"19010", "LINC00200", 0.102230937222884, -1.35173207482145, 3.352475197537  
38, -0.403204198442509, 0.686798011343181, NA  
"19011", "ADARB2", 0, NA, NA, NA, NA, NA  
"19012", "LINC02645", 0.205372544040962, 0.695830627438559, 3.337471494297  
51, 0.208490358233014, 0.834846110249776, NA  
"19013", "AL731533.2", 0.719727035257003, 0.679700641862549, 1.93477018432  
166, 0.351308205682762, 0.725357139551418, NA  
"19014", "PITRM1-  
AS1", 0.493119499439241, -0.952416668022215, 2.10779968121878, -0.45185350  
2260474, 0.651374523466806, NA  
"19015", "LINC02669", 1.06998998460461, -0.341018631523022, 1.636125705257

49,-0.208430581114397,0.834892780350557,NA  
"19016","AL450322.2",0.0534622507802646,-0.0533240139618838,3.35247519  
753738,-0.015905863822961,0.987309491940711,NA  
"19017","AL513303.1",0.205372544040962,0.695830627438559,3.33747149429  
751,0.208490358233014,0.834846110249776,NA  
"19018","LINC02660",1.19181282167743,-2.29321448547855,1.5293241734818  
4,-1.49949534914991,0.133745174351012,NA  
"19019","AC025822.1",0.205372544040962,0.695830627438559,3.33747149429  
751,0.208490358233014,0.834846110249776,NA  
"19020","AC022535.2",0.233061356241168,-0.774663445836492,3.3508580764  
8355,-0.231183603767975,0.817172167312465,NA  
"19021","MANCR",0.20774765419889,-0.335374473295219,3.34626863491525,-  
0.10022341595528,0.920166956363588,NA  
"19022","AL391427.1",0.362033057617515,-0.5984476044562,2.998687317789  
8,-0.199569858753159,0.841817002766004,NA  
"19023","AL355303.2",0,NA,NA,NA,NA,NA  
"19024","AL355303.1",0,NA,NA,NA,NA,NA  
"19025","LINC02561",0,NA,NA,NA,NA,NA  
"19026","CALML3-  
AS1",0.102686272020481,-0.0533240139618846,3.35247519753738,-0.0159058  
638229612,0.987309491940711,NA  
"19027","AL365356.1",0.37573617066445,-0.843172790991496,2.24094932849  
463,-0.376256964077765,0.706725870194141,NA  
"19028","AL596094.1",0.971941353091889,-2.28490484254227,1.81777853801  
876,-1.25697646591902,0.208762157561425,NA  
"19029","IL2RA",1.45363466605777,-0.752158781224231,1.41240552023863,-  
0.532537412553549,0.594353837053287,NA  
"19030","AL137186.1",2.09152936334888,1.1139596372646,1.16051335117423  
,0.959885240559685,0.337112975242676,NA  
"19031","AL157395.1",0.33713047520475,-2.38103637458962,3.318158042575  
58,-0.71757774766552,0.473017682228765,NA  
"19032","LINC02656",1.03053837061903,-0.350406724298006,1.370329874274  
28,-0.25570976074909,0.79817495770651,NA  
"19033","PRKCQ",1.95933993070707,3.12359842950116,1.46797772035482,2.1  
2782413941961,0.0333516671461729,NA  
"19034","LINC00707",0.102686272020481,-0.0533240139618846,3.3524751975  
3738,-0.0159058638229612,0.987309491940711,NA  
"19035","AL392086.3",1.66789878784791,-0.775960409628692,1.57117887837  
368,-0.493871461938112,0.621396960253162,NA  
"19036","GATA3-AS1",0,NA,NA,NA,NA,NA  
"19037","AL136369.2",0.594371368741227,-0.597333614360027,2.2908194124  
6057,-0.260751070604222,0.794284479332328,NA  
"19038","AL136369.1",0.102686272020481,-0.0533240139618846,3.352475197  
53738,-0.0159058638229612,0.987309491940711,NA  
"19039","AL162408.1",0.11921983002294,-0.0533240139618846,3.3524751975  
3738,-0.0159058638229612,0.987309491940711,NA  
"19040","CELF2-  
AS1",1.7780524512002,0.180618493340131,1.28230117649448,0.140854969683  
41,0.887984516373391,NA  
"19041","AL512631.1",0.102686272020481,-0.0533240139618846,3.352475197

53738,-0.0159058638229612,0.987309491940711,NA  
"19042","PROSER2-  
AS1",0.307603481263847,-0.0321837065735757,3.12361882183901,-0.0103033  
399429408,0.99177926958558,NA  
"19043","AL512770.1",1.28649999194879,-0.503032512683674,1.22276679115  
071,-0.411388758939295,0.680787495223499,NA  
"19044","MCM10",0.739788985953365,1.20921846134759,1.80055747674315,0.  
671580039496891,0.501851089028035,NA  
"19045","AL157392.4",2.18114772076418,0.0806206394392297,1.15900072305  
166,0.0695604738079496,0.944543498030386,NA  
"19046","AC044781.1",0,NA,NA,NA,NA,NA  
"19047","AL157896.1",0.0534622507802646,-0.0533240139618838,3.35247519  
753738,-0.015905863822961,0.987309491940711,NA  
"19048","MEIG1",1.04341020564953,-0.119609211119058,1.4508176373364,-0  
.0824426227259355,0.93429474335325,NA  
"19049","OLAH",0,NA,NA,NA,NA,NA  
"19050","ACBD7",0.128992237277586,0.513744972953418,3.34245151459318,0  
.153703044220807,0.877843884367224,NA  
"19051","RPP38-  
DT",0.650243217250087,-0.944896621751879,2.21452480807246,-0.426681434  
458314,0.669611374796641,NA  
"19052","AL353576.1",0.512065355709616,-1.06150386659694,2.70394994202  
393,-0.392575265576991,0.694633211047969,NA  
"19053","AC073367.1",0.102686272020481,-0.0533240139618846,3.352475197  
53738,-0.0159058638229612,0.987309491940711,NA  
"19054","ST8SIA6",1.7534875357999,-1.80957967067887,1.22123422804264,-  
1.48176298135634,0.138403372271565,NA  
"19055","ST8SIA6-  
AS1",0.11921983002294,-0.0533240139618846,3.35247519753738,-0.01590586  
38229612,0.987309491940711,NA  
"19056","TMEM236",0.565217167634068,-1.13473408304332,2.05996450291903  
, -0.550851279930004,0.581735627872103,NA  
"19057","AL390783.1",0,NA,NA,NA,NA,NA  
"19058","AL157895.1",0.870016065700861,0.913549684793395,1.65361736939  
955,0.552455302961119,0.580636449722662,NA  
"19059","AL353147.1",0.950942340320778,0.901083724271661,1.51675255365  
324,0.594087494430992,0.552453594657931,NA  
"19060","AC069549.1",0.38679665665695,-0.154274896056064,2.50238787680  
135,-0.0616510723562424,0.950840704404243,NA  
"19061","AC069549.2",2.07559586526246,0.0974272012757009,1.18166966010  
36,0.0824487625984739,0.934289861065145,NA  
"19062","NEBL",0.739455037494987,-1.21807042658843,1.76676135174915,-0  
.689436875774142,0.490548384304968,NA  
"19063","AL358780.1",0.514194757372739,-0.815564390449139,2.1241739774  
0037,-0.383944252743012,0.701019766379165,NA  
"19064","AL359697.1",0.779797849688672,1.60386085043572,1.622643482410  
54,0.988424671113262,0.322944709803008,NA  
"19065","AL158211.4",0.390016004848199,-1.51607450676223,2.47182512334  
38,-0.613342138343241,0.539650136358375,NA  
"19066","AL158211.3",0.968695386766668,-1.6542124531443,1.561207750719

67,-1.05957227818127,0.28933923088988,NA  
"19067","AL513128.3",0.244806367132003,0.695807100884759,3.33664907448  
574,0.208534696143316,0.834811494458112,NA  
"19068","C10orf67",0,NA,NA,NA,NA,NA  
"19069","AL606469.1",0.220189306641942,-0.267602342861375,2.9350649655  
7825,-0.0911742486111047,0.927354136344172,NA  
"19070","AL512603.2",0,NA,NA,NA,NA,NA  
"19071","AL356113.1",1.82426367976185,-2.11616392857012,1.287610277746  
59,-1.64348170028089,0.100283308522023,NA  
"19072","ENKUR",0.896607532172356,0.0861753634232186,1.53408942034721,  
0.0561736247445828,0.955203492381592,NA  
"19073","GAD2",0.610565663513759,2.24059455301725,2.18956134408412,1.0  
2330750361072,0.30616247705663,NA  
"19074","AL390961.2",0,NA,NA,NA,NA,NA  
"19075","MKX-AS1",0,NA,NA,NA,NA,NA  
"19076","ARMC4",0,NA,NA,NA,NA,NA  
"19077","AL355501.1",0,NA,NA,NA,NA,NA  
"19078","MPP7-  
DT",0.102230937222884,-1.35173207482145,3.35247519753738,-0.4032041984  
42509,0.686798011343181,NA  
"19079","AL158167.1",0.513943350878213,0.00219173224131171,2.334489450  
34698,0.000938848638183368,0.999250907276709,NA  
"19080","AL590068.4",0.440232289303243,-0.390811325178579,1.9743192976  
0485,-0.197947376421176,0.843086236460413,NA  
"19081","AL590068.1",0.23843966004588,0.69583062743856,3.3374714942975  
1,0.208490358233014,0.834846110249776,NA  
"19082","AL161935.1",0.392725063464505,0.436361440043309,2.52949247325  
711,0.172509483486,0.863037006384558,NA  
"19083","AL161935.3",0.876564115604538,0.906378090678083,1.59237531378  
128,0.569198782996568,0.569221246474644,NA  
"19084","AL391839.2",0.351730868692533,1.42565098196998,2.540190030262  
99,0.561237925110027,0.574635352232741,NA  
"19085","AL391839.3",0.38493353727483,-1.50988982818878,2.489510293506  
02,-0.606500737164005,0.544182292990528,NA  
"19086","IATPR",0,NA,NA,NA,NA,NA  
"19087","AL353600.2",0.0644961186387932,-0.0533240139618838,3.35247519  
753738,-0.015905863822961,0.987309491940711,NA  
"19088","PARD3-  
AS1",1.36316141889468,-0.670131070513721,1.22328177020015,-0.547814156  
017447,0.583819517472612,NA  
"19089","AL392046.1",0.278345121759852,1.24046499102498,3.168350570686  
35,0.391517593571176,0.695414686671429,NA  
"19090","AL117336.1",0.762212053448635,-2.82747945139679,1.84821337991  
201,-1.52984470414959,0.126055173190147,NA  
"19091","AL603824.1",1.48525132685508,0.35200455773002,1.6678889769709  
,0.211047954983973,0.832849851336239,NA  
"19092","AL121749.2",0.67228988823652,-2.4880023399648,2.1856668758596  
3,-1.13832641535836,0.254984207787919,NA  
"19093","AL132657.1",0.404360590101272,1.67914061260049,2.136754419308  
4,0.785836967237428,0.431963006206044,NA

"19094", "RASGEF1A", 1.02403225102212, 0.0683667186209204, 1.4444249464168, 0.0473314441089644, 0.962249067383561, NA  
"19095", "AL645634.2", 1.3927309268028, -0.468645871990299, 1.26970768874204, -0.36909745144145, 0.712055088503286, NA  
"19096", "ZNF32-AS2", 0.832232799872781, -1.11399088812882, 1.6572958185092, -0.67217383625025, 0.5014730352618, NA  
"19097", "LINC00840", 0.947518849257726, 0.860690952858571, 1.64413710528045, 0.52349098508531, 0.600632622841333, NA  
"19098", "LINC00841", 0, NA, NA, NA, NA, NA  
"19099", "C10orf142", 0.911638322816312, 1.90651460372702, 1.54494715607224, 1.2340322426134, 0.217190889917557, NA  
"19100", "LINC00842", 0.142120095111522, -0.0533240139618842, 3.35247519753738, -0.0159058638229611, 0.987309491940711, NA  
"19101", "SYT15", 1.542221192756, 0.497625532456871, 1.16524712077059, 0.427055792360841, 0.669338691091446, NA  
"19102", "AL356056.2", 1.89102532753287, 1.20913779908302, 1.12326309107973, 1.07645110810214, 0.281725555697605, NA  
"19103", "AL356056.1", 1.11185333390594, -0.388590498419528, 1.37950833282051, -0.281687677540174, 0.77818300393803, NA  
"19104", "FAM245B", 0.632279129439931, -1.06165134887264, 1.80926975505058, -0.586784444889459, 0.557348485074899, NA  
"19105", "LRRC18", 1.43194965986354, 1.88929639458661, 1.57179594105752, 1.20199851980497, 0.229364101576022, NA  
"19106", "TIMM23B-AGAP6", 1.32304134026261, -0.81431316380551, 1.57827564281914, -0.515951169563114, 0.605888514323627, NA  
"19107", "AGAP6", 0, NA, NA, NA, NA, NA  
"19108", "ASA2", 0.368828695935996, -0.759515927569295, 2.55341694271137, -0.297450805963086, 0.766122360316387, NA  
"19109", "AL589794.2", 0, NA, NA, NA, NA, NA  
"19110", "AL731537.1", 1.20445378611464, -1.21589037397944, 1.47277222096917, -0.825579377902247, 0.409042737296354, NA  
"19111", "AC022537.1", 0, NA, NA, NA, NA, NA  
"19112", "PRKG1-AS1", 1.76369963606753, 1.43834528412637, 1.29140407413285, 1.1137840687797, 0.265371833122116, NA  
"19113", "LNCAROD", 0.102230937222884, -1.35173207482145, 3.35247519753738, -0.403204198442509, 0.686798011343181, NA  
"19114", "PCDH15", 0.361521066841708, 1.49138941530967, 2.96515696371608, 0.502971489725318, 0.614984317080534, NA  
"19115", "AC010996.1", 0.307603481263847, -0.0321837065735757, 3.12361882183901, -0.0103033399429408, 0.99177926958558, NA  
"19116", "LINC00844", 0.561315238708303, 1.08888001239347, 1.86965970465012, 0.582394758621189, 0.56030081120129, NA  
"19117", "AL355474.1", 0.573581790304191, -0.741511920278138, 2.28658689310094, -0.324287663204674, 0.745720258799619, NA  
"19118", "AC026391.1", 0, NA, NA, NA, NA, NA  
"19119", "MRLN", 0, NA, NA, NA, NA, NA  
"19120", "ANK3-DT", 0, NA, NA, NA, NA, NA

"19121", "CDK1", 1.08947537390181, -1.06765908448995, 1.5676274855689, -0.68106683144975, 0.495829203454641, NA  
"19122", "TMEM26", 0.77464126508156, 1.67963408783152, 2.15756202362869, 0.77848704669293, 0.436281940038841, NA  
"19123", "CABCOC01", 0.860621983702032, -3.66690375758719, 1.69951202397844, -2.15762154421433, 0.0309572682645329, NA  
"19124", "LINC02621", 0.156148522800746, 0.494635591052761, 3.34300496985029, 0.147961368742719, 0.882373255878367, NA  
"19125", "ZNF365", 1.03878523160631, 1.32687826803045, 1.62131024262296, 0.818398745130869, 0.413129538044608, NA  
"19126", "AC067752.1", 0, NA, NA, NA, NA, NA  
"19127", "LINC01515", 0.102686272020481, -0.0533240139618846, 3.35247519753738, -0.0159058638229612, 0.987309491940711, NA  
"19128", "DNAJC12", 0.775526263259845, -2.11157090378912, 1.7340983029262, -1.21767658743795, 0.223346897495678, NA  
"19129", "AL133551.1", 0.944545155167267, -0.698052376579685, 1.41544104399, -0.493169517404934, 0.621892814379479, NA  
"19130", "ATOH7", 0.836923289364719, 1.50748951484164, 1.88482495676576, 0.799803456246882, 0.423824680249082, NA  
"19131", "STOX1", 0.439228531995352, -2.46728027436688, 3.28084590987215, -0.752025648916572, 0.452035634424039, NA  
"19132", "AL596223.1", 0, NA, NA, NA, NA, NA  
"19133", "HKDC1", 0.168565237602375, -1.35173207482145, 3.35247519753738, -0.40320419844251, 0.686798011343181, NA  
"19134", "TACR2", 1.6173763735612, -1.02768516093584, 1.22809870761636, -0.836809903440495, 0.402699429778636, NA  
"19135", "AC016821.1", 0, NA, NA, NA, NA, NA  
"19136", "AL450311.1", 0, NA, NA, NA, NA, NA  
"19137", "FAM241B", 0.733928729217085, -1.32586109238297, 1.60449446533626, -0.826341954445513, 0.408610140539476, NA  
"19138", "NPFFR1", 0.156148522800746, 0.494635591052761, 3.34300496985029, 0.147961368742719, 0.882373255878367, NA  
"19139", "PALD1", 0.904799246413564, -0.0444421010408335, 1.51936978258489, -0.0292503520540105, 0.976664923261693, NA  
"19140", "UNC5B-AS1", 1.58092963371496, -0.703558347668045, 1.21182865948467, -0.580575762226346, 0.561526411691098, NA  
"19141", "C10orf105", 0.306195696679323, -0.0320258052725539, 3.12823849898919, -0.0102376482109348, 0.991831681239967, NA  
"19142", "AC022392.1", 0, NA, NA, NA, NA, NA  
"19143", "DDIT4-AS1", 0.897062866969953, 0.83189590706889, 1.55664132203102, 0.534417206645572, 0.59305291697401, NA  
"19144", "AC091769.2", 1.67671439267798, 1.32524166231928, 1.21511145831473, 1.09063382889772, 0.27543403790605, NA  
"19145", "AC016542.1", 0.892274319858329, 1.84875048015117, 1.62987657114073, 1.1342886405547, 0.256673492505291, NA  
"19146", "OIT3", 0.102686272020481, -0.0533240139618846, 3.35247519753738, -0.0159058638229612, 0.987309491940711, NA  
"19147", "DNAJC9-



AS1",0.681476532546176,-1.07443767788495,1.75081685427611,-0.613677938  
535258,0.539428169590312,NA  
"19148","AC073389.3",0.969785333294793,-2.45431773818642,1.63205489373  
699,-1.50382058079349,0.132627570469685,NA  
"19149","MY0Z1",1.84689153659131,0.77027699900526,1.19881632580265,0.6  
4253128892746,0.520528280401271,NA  
"19150","SYNP02L",0,NA,NA,NA,NA,NA  
"19151","AC073389.2",1.23055679212121,1.06565072973422,1.3690822896417  
9,0.778368647229402,0.436351716581071,NA  
"19152","AC022400.4",2.0712488231317,0.255184541742168,1.0179598477635  
9,0.250682325342003,0.802059726767517,NA  
"19153","AC022400.1",0,NA,NA,NA,NA,NA  
"19154","AL596247.1",1.31085681870488,0.156853405869683,1.579175695751  
06,0.0993261271001785,0.920879334560175,NA  
"19155","AC022540.1",0.156148522800746,0.494635591052761,3.34300496985  
029,0.147961368742719,0.882373255878367,NA  
"19156","AC010997.5",0.668937847744866,-0.163825790016098,2.2270801349  
7214,-0.0735607971368069,0.941359865940049,NA  
"19157","AC010997.4",1.29684798965836,1.66978893070204,1.3579046057519  
7,1.22968058553522,0.218816739750645,NA  
"19158","AL589863.2",1.22911527634152,0.158135708575816,1.308423868691  
53,0.120859694140216,0.903802167495147,NA  
"19159","AL589863.1",1.89304234019756,2.18062383307513,1.2867905747882  
,1.69462216758469,0.0901471190869217,NA  
"19160","AL731568.1",0.625811357347096,1.30150113315605,1.800601741459  
53,0.722814547597338,0.469793828469515,NA  
"19161","AL391421.1",0.142120095111522,-0.0533240139618842,3.352475197  
53738,-0.0159058638229611,0.987309491940711,NA  
"19162","LINC00595",0.957051558679642,1.25419530619967,1.5208627732788  
9,0.824660402131938,0.409564418654455,NA  
"19163","AC010163.2",0,NA,NA,NA,NA,NA  
"19164","AL356753.1",0,NA,NA,NA,NA,NA  
"19165","LINC02679",0.244351032334407,-0.774664026145693,3.30062972833  
046,-0.234701887187309,0.814440122883676,NA  
"19166","AL132656.2",0,NA,NA,NA,NA,NA  
"19167","NUTM2B",0.102686272020481,-0.0533240139618846,3.3524751975373  
8,-0.0159058638229612,0.987309491940711,NA  
"19168","NUTM2E",0.244806367132003,0.695807100884759,3.33664907448574,  
0.208534696143316,0.834811494458112,NA  
"19169","AL512662.2",1.16615234613364,0.353000719162144,1.406346500750  
5,0.251005508936641,0.801809849998079,NA  
"19170","SFTPD",0,NA,NA,NA,NA,NA  
"19171","SFTPD-  
AS1",0.719968891822284,1.46915814328,1.81199915013704,0.81079405758489  
6,0.417483947622157,NA  
"19172","DYDC2",2.20462826840696,-2.28222212666701,1.11231947283514,-2  
.05176856326175,0.0401921598358689,NA  
"19173","AC021028.1",0.166727055861678,-0.774663427007578,3.3524751975  
3738,-0.231072082972193,0.817258802814835,NA  
"19174","SH2D4B",0,NA,NA,NA,NA,NA

"19175", "NRG3", 0.165319271277154, -0.774663427007578, 3.35247519753738, -0.231072082972193, 0.817258802814835, NA  
"19176", "AL603756.1", 0.732590291302485, 0.185098303656911, 2.25593264172146, 0.0820495702015581, 0.934607294986998, NA  
"19177", "CDHR1", 0.11921983002294, -0.0533240139618846, 3.35247519753738, -0.0159058638229612, 0.987309491940711, NA  
"19178", "LDB3", 1.14649806807859, 0.8801692575883, 1.43099492988525, 0.615075035701823, 0.538505167708468, NA  
"19179", "AL136982.3", 0.244806367132003, 0.695807100884759, 3.33664907448574, 0.208534696143316, 0.834811494458112, NA  
"19180", "NUTM2A", 1.76971098174534, -0.849955500831287, 1.03948206907655, -0.817672113946479, 0.413544437699349, NA  
"19181", "NUTM2D", 0.843171684957331, 0.728040634337366, 1.57631055895623, 0.461863704585882, 0.644179063569448, NA  
"19182", "AL355334.2", 2.01866717871616, -1.07170716917449, 1.18776650279761, -0.902287753232845, 0.366904029489607, NA  
"19183", "KLLN", 0.800457800821206, 1.66172192694646, 1.75067143314976, 0.949191204860607, 0.342523373955552, NA  
"19184", "AC063965.2", 0.0534622507802646, -0.0533240139618838, 3.35247519753738, -0.015905863822961, 0.987309491940711, NA  
"19185", "LIPJ", 0.204461874445769, -1.96013641505178, 3.33548947920397, -0.587660799793491, 0.556759992345141, NA  
"19186", "LIPN", 0, NA, NA, NA, NA, NA  
"19187", "ANKRD22", 0.701720218910896, -0.303974525219222, 1.81109507304896, -0.167840181193516, 0.866709010843004, NA  
"19188", "ACTA2-AS1", 0.592957535609669, -0.451481560624059, 2.03933985814208, -0.22138613082146, 0.824791790528773, NA  
"19189", "AL157400.3", 0.680524082759249, -0.238716172098907, 1.98199423023299, -0.120442415249032, 0.904132693422058, NA  
"19190", "LINC01374", 0.204461874445769, -1.96013641505178, 3.33548947920397, -0.587660799793491, 0.556759992345141, NA  
"19191", "HTR7", 0.464420633129679, -0.0665423382788266, 2.42075632614887, -0.0274882430586012, 0.978070316985615, NA  
"19192", "AL365434.2", 0.102686272020481, -0.0533240139618846, 3.35247519753738, -0.0159058638229612, 0.987309491940711, NA  
"19193", "AL731553.1", 0, NA, NA, NA, NA, NA  
"19194", "AL359198.1", 0.718842983795782, -0.656427525412796, 1.77999146656074, -0.368781276621023, 0.712290761634184, NA  
"19195", "HHEX", 1.50531614745104, -2.68007218340081, 1.24295647039952, -2.15620759634435, 0.0310674586557163, NA  
"19196", "CEP55", 0.182454488057851, 0.814003878402388, 3.33451052748657, 0.244114952312343, 0.80714179253596, NA  
"19197", "FFAR4", 0, NA, NA, NA, NA, NA  
"19198", "AL157396.1", 1.50327974649268, 0.517231800093028, 1.49463088740279, 0.346059889737605, 0.729297706503492, NA  
"19199", "PLCE1-AS2", 0.11921983002294, -0.0533240139618846, 3.35247519753738, -0.0159058638229612, 0.987309491940711, NA  
"19200", "AL139118.1", 0, NA, NA, NA, NA, NA

"19201", "PLCE1-AS1", 0, NA, NA, NA, NA, NA  
"19202", "AL139124.1", 0.422668355858921, -2.6205236288258, 2.368663823488  
53, -1.10632990753679, 0.268583751419472, NA  
"19203", "CYP2C8", 0.183715948661733, 0.576034712544328, 3.34068880739852,  
0.172429922616139, 0.863099549623161, NA  
"19204", "ACSM6", 0.509705121338165, -0.0585305308992107, 2.76592082197377  
, -0.0211613182974063, 0.983116970894323, NA  
"19205", "AC021037.1", 0.532006079804414, -1.15597707439056, 2.07883322985  
361, -0.55607013481883, 0.578162910443576, NA  
"19206", "BLNK", 0.887922912713284, -1.88844583826369, 1.62957060141966, -1  
.15886101321323, 0.246512842726057, NA  
"19207", "TLL2", 1.91868467733971, -1.33325098240261, 1.11986491970918, -1.  
19054625155045, 0.233831762568855, NA  
"19208", "SLIT1", 0.807690590191949, 1.76595349381008, 1.57592157242583, 1.  
12058463105606, 0.262464709965982, NA  
"19209", "AL355490.1", 0.423097072522546, -1.79554273832128, 2.39217736801  
592, -0.750589300913966, 0.452899862067976, NA  
"19210", "AL355490.2", 0.102686272020481, -0.0533240139618846, 3.352475197  
53738, -0.0159058638229612, 0.987309491940711, NA  
"19211", "HOGA1", 1.25394849137604, -0.841418109969681, 1.38193129432722, -  
0.608871159820804, 0.542609841800878, NA  
"19212", "GOLGA7B", 1.15288278062798, 0.468502268131983, 1.53298167431136,  
0.305615048100586, 0.759897761623734, NA  
"19213", "AL139241.1", 0, NA, NA, NA, NA, NA  
"19214", "AL133353.1", 1.11439679101495, -0.280335691792735, 1.55198777223  
527, -0.18063009052512, 0.85665793554451, NA  
"19215", "DNMBP-  
AS1", 0.203509424658842, -0.774663427007579, 3.35247519753738, -0.23107208  
2972194, 0.817258802814834, NA  
"19216", "PKD2L1", 0.0644961186387932, -0.0533240139618838, 3.352475197537  
38, -0.015905863822961, 0.987309491940711, NA  
"19217", "AL133215.3", 0, NA, NA, NA, NA, NA  
"19218", "SEMA4G", 1.0767536657904, 0.41895827780185, 1.41372157951644, 0.2  
96351335278586, 0.766961785729376, NA  
"19219", "PDZD7", 0.761170301710806, 1.65290118382737, 1.73467158420415, 0.  
952861163391745, 0.340660419666952, NA  
"19220", "FGF8", 0, NA, NA, NA, NA, NA  
"19221", "KCNIP2-  
AS1", 0.0644961186387932, -0.0533240139618838, 3.35247519753738, -0.015905  
863822961, 0.987309491940711, NA  
"19222", "KCNIP2", 0.891659625523818, -1.22547748497088, 1.67700095929844,  
-0.730755386975779, 0.464928577999881, NA  
"19223", "ELOVL3", 1.04368654978548, 0.379281875902813, 1.41221983790247, 0.  
.268571411987916, 0.788259514152386, NA  
"19224", "PITX3", 1.37040262751278, 0.711269750113264, 1.253000744608, 0.56  
7653094520535, 0.570270547217036, NA  
"19225", "C10orf95", 0.581348627106874, -1.79109491970506, 2.6133382276478  
3, -0.685366670397333, 0.493112570470139, NA  
"19226", "AL121928.1", 0.338834096020616, -0.774667674034573, 2.9654685095  
3071, -0.261229438635032, 0.793915577320881, NA

"19227", "RPEL1", 0.220042982661301, -0.774663427007579, 3.35247519753738, -0.231072082972194, 0.817258802814834, NA  
"19228", "AL139339.2", 0.698474252585674, 0.162818544639544, 1.76123811159036, 0.0924455038578076, 0.92634408733918, NA  
"19229", "AL121929.2", 1.21407511405039, 0.392117073541388, 1.30254524363443, 0.301039119721693, 0.763384664093861, NA  
"19230", "SH3PXD2A-AS1", 0, NA, NA, NA, NA, NA  
"19231", "AL133355.1", 0.928191903635248, -3.84228062283649, 1.84456230989576, -2.08303108126156, 0.0372483905575808, NA  
"19232", "COL17A1", 0.286402220682214, 1.17253773374183, 2.71767620516714, 0.431448651429658, 0.666142181249859, NA  
"19233", "CFAP43", 0.865538881562098, 2.71562978637766, 1.7901785291005, 1.51696031554024, 0.129276703739619, NA  
"19234", "GST02", 1.82572255729861, -0.470322087674775, 1.02181945767447, -0.46027904845849, 0.645315937792983, NA  
"19235", "ITPRIP-AS1", 0, NA, NA, NA, NA, NA  
"19236", "CFAP58-DT", 0, NA, NA, NA, NA, NA  
"19237", "CFAP58", 0.203509424658842, -0.774663427007579, 3.35247519753738, -0.231072082972194, 0.817258802814834, NA  
"19238", "SORCS3", 1.90812568852747, -0.366272996654066, 1.42068311684725, -0.257814703582098, 0.796549916193331, NA  
"19239", "LINC02624", 0, NA, NA, NA, NA, NA  
"19240", "AL355512.1", 1.54261860211513, -0.550343985897271, 1.1921210767909, -0.4616510827732, 0.644331555817277, NA  
"19241", "AL158163.2", 1.10392478921507, 0.300414937827948, 1.52430848011878, 0.197082770151969, 0.843762766423886, NA  
"19242", "AL158212.5", 0.87052881285217, -2.03158458326522, 1.65830794451616, -1.22509488661828, 0.220539471562232, NA  
"19243", "NRAP", 0, NA, NA, NA, NA, NA  
"19244", "AL592546.3", 0.11921983002294, -0.0533240139618846, 3.35247519753738, -0.0159058638229612, 0.987309491940711, NA  
"19245", "TDRD1", 0.9231870965587, 0.432782799112646, 1.86642659136742, 0.231877750303361, 0.81663296627404, NA  
"19246", "AC005383.1", 0.939718495828608, -0.65114359593547, 1.41429771929567, -0.460400654721939, 0.645228664828106, NA  
"19247", "AL137025.1", 0.311841710803895, 0.171849028305229, 2.65045670284036, 0.064837515784003, 0.948303371003042, NA  
"19248", "ATRNLI", 0.544903067045063, -0.204231608181226, 1.86914345105302, -0.109264812214476, 0.912992455237083, NA  
"19249", "AC016042.1", 0, NA, NA, NA, NA, NA  
"19250", "C10orf82", 0.359657947459587, 0.367118670205437, 2.58028016787908, 0.14227860787195, 0.886859943060388, NA  
"19251", "AC016825.1", 0, NA, NA, NA, NA, NA  
"19252", "AC023283.1", 0.128992237277586, 0.513744972953418, 3.34245151459318, 0.153703044220807, 0.877843884367224, NA  
"19253", "AL731557.1", 0.231223174500471, -0.207595008908767, 3.34245142718562, -0.062108609034766, 0.950476341218052, NA  
"19254", "SLC18A2", 2.00657042701778, 0.350231723507415, 1.35612004459323, 0.258260118566765, 0.796206163190549, NA  
"19255", "AL356419.1", 0.493694540083508, -0.0723554617280387, 1.908507415

37281,-0.0379120673806262,0.969757791588657,NA  
"19256","AC022395.1",0,NA,NA,NA,NA,NA  
"19257","AL157388.1",0.154285403418625,-0.774663427007578,3.3524751975  
3738,-0.231072082972193,0.817258802814835,NA  
"19258","GRK5-IT1",0,NA,NA,NA,NA,NA  
"19259","AL583824.1",0.102686272020481,-0.0533240139618846,3.352475197  
53738,-0.0159058638229612,0.987309491940711,NA  
"19260","PLPP4",0,NA,NA,NA,NA,NA  
"19261","AC023282.1",0.274913018026089,-0.226100793799534,2.7407223210  
9206,-0.0824967900102491,0.934251670836265,NA  
"19262","WDR11-  
AS1",0.791408438684016,1.52174287696263,1.69816989492207,0.89610755762  
0115,0.370195321034016,NA  
"19263","AC010998.2",1.18498235649076,1.50922197882455,1.6629762990217  
1,0.907542686995831,0.364119886615629,NA  
"19264","AL731566.3",0.269868662679755,1.13857476503723,3.232474371463  
12,0.352230098121977,0.724665706448339,NA  
"19265","AL731566.2",1.91695319812048,0.58925737841769,1.1669913573824  
6,0.50493722570438,0.613602927065964,NA  
"19266","AC063960.2",1.46666391646135,-0.248249822222881,1.32074621932  
587,-0.187961789017721,0.850906605190345,NA  
"19267","BTBD16",1.03192121756214,-1.30718092557585,1.33728899940988,-  
0.977485738798931,0.328328734658679,NA  
"19268","BX842242.1",0.205372544040962,0.695830627438559,3.33747149429  
751,0.208490358233014,0.834846110249776,NA  
"19269","CUZD1",1.46804743506781,-0.40242683186152,1.18435007620932,-0  
.33978706122901,0.734016892452738,NA  
"19270","HMX3",1.28270293096817,0.629145443883121,1.32025033920879,0.4  
76534960983352,0.633693306374093,NA  
"19271","LINC02641",1.17719251079363,-0.313663279734843,1.684092184759  
89,-0.186250659300794,0.852248198528103,NA  
"19272","FAM53B-  
AS1",0.519264050360496,-0.218221100791361,2.12444695467237,-0.10271901  
6029758,0.918185980868267,NA  
"19273","AL731571.1",0.920826862187249,1.10118160015527,1.881220468626  
49,0.585354889828123,0.558309114088955,NA  
"19274","AL157888.1",0.579245595323292,-0.701206872094538,1.8550998905  
9121,-0.377988741011174,0.705438957965695,NA  
"19275","AL158835.2",0.0534622507802646,-0.0533240139618838,3.35247519  
753738,-0.015905863822961,0.987309491940711,NA  
"19276","EDRF1-  
AS1",0.0644961186387932,-0.0533240139618838,3.35247519753738,-0.015905  
863822961,0.987309491940711,NA  
"19277","MMP21",2.06697248136462,-0.141203586262138,1.01330944800019,-  
0.139348928938548,0.889174427309405,NA  
"19278","ADAM12",53.6546204290247,0.737665075710091,1.17113054468397,0  
.629874337287607,NA,NA  
"19279","AL589787.2",0,NA,NA,NA,NA,NA  
"19280","LINC00601",0.102686272020481,-0.0533240139618846,3.3524751975  
3738,-0.0159058638229612,0.987309491940711,NA

"19281", "C10orf90", 0.102686272020481, -0.0533240139618846, 3.35247519753738, -0.0159058638229612, 0.987309491940711, NA  
"19282", "AL589787.1", 0, NA, NA, NA, NA, NA  
"19283", "AL359094.1", 0.951045742342114, 1.11733197585629, 1.74377544577078, 0.640754506875406, 0.521682194419868, NA  
"19284", "INSYN2A", 0.490864095127983, -0.196409365814871, 2.14485087105937, -0.0915725043941455, 0.927037697953741, NA  
"19285", "AL158166.2", 0, NA, NA, NA, NA, NA  
"19286", "AL158166.1", 0, NA, NA, NA, NA, NA  
"19287", "MKI67", 1.70188946989814, 2.84436909214465, 3.17278121095048, 0.896490776712759, 0.369990704140891, NA  
"19288", "LINC01163", 0.102686272020481, -0.0533240139618846, 3.35247519753738, -0.0159058638229612, 0.987309491940711, NA  
"19289", "AL355531.1", 0.72975908997146, 1.51956113447961, 1.9664924893852, 0.772726640290748, 0.439684176971985, NA  
"19290", "LINC02666", 1.89653419329966, 1.78662917545706, 1.38846554121701, 1.28676522565411, 0.198176130915331, NA  
"19291", "AL354950.2", 1.195870093792, 0.432952938495441, 1.30033662846805, 0.332954505023451, 0.739168625310965, NA  
"19292", "AL354950.1", 2.08501964024097, 1.4183629631859, 1.21974562490324, 1.16283504874094, 0.244896433948237, NA  
"19293", "AL354950.3", 0.102686272020481, -0.0533240139618846, 3.35247519753738, -0.0159058638229612, 0.987309491940711, NA  
"19294", "AL139123.1", 0.220042982661301, -0.774663427007579, 3.35247519753738, -0.231072082972194, 0.817258802814834, NA  
"19295", "TCERG1L", 0.142120095111522, -0.0533240139618842, 3.35247519753738, -0.0159058638229611, 0.987309491940711, NA  
"19296", "AL162274.1", 1.8309431401184, 2.92061752171445, 1.44336653249802, 2.02347598891583, 0.0430240966807807, NA  
"19297", "JAKMIP3", 2.0123996669617, 1.8931181942665, 1.3893882770463, 1.36255518024888, 0.173022742363215, NA  
"19298", "DPYSL4", 2.21611501888965, 0.63603329832402, 1.22027028423819, 0.521223294985908, 0.602211228142976, NA  
"19299", "AL451069.2", 0, NA, NA, NA, NA, NA  
"19300", "C10orf91", 0, NA, NA, NA, NA, NA  
"19301", "AL451069.1", 0.322300538018157, -0.774667165166207, 3.0144598883595, -0.256983736342828, 0.797191328075268, NA  
"19302", "CFAP46", 0.322850641021, -1.51171106944378, 2.60963996021438, -0.579279552923307, 0.562400559885429, NA  
"19303", "KNDC1", 0, NA, NA, NA, NA, NA  
"19304", "UTF1", 0.322850641021, -1.51171106944378, 2.60963996021438, -0.579279552923307, 0.562400559885429, NA  
"19305", "MIR202HG", 0.154285403418625, -0.774663427007578, 3.35247519753738, -0.231072082972193, 0.817258802814835, NA  
"19306", "AL592071.1", 0, NA, NA, NA, NA, NA  
"19307", "AL360181.2", 0.73114193691456, 0.296190099601537, 2.01503384629622, 0.146990136243098, 0.883139805890229, NA  
"19308", "CALY", 0.0644961186387932, -0.0533240139618838, 3.35247519753738, -0.015905863822961, 0.987309491940711, NA  
"19309", "SPRN", 0, NA, NA, NA, NA, NA

"19310", "CYP2E1", 2.29770384602468, 0.455014809472831, 0.956635947598945, 0.475640509448626, 0.634330510195901, NA  
"19311", "AL161645.1", 0.102686272020481, -0.0533240139618846, 3.35247519753738, -0.0159058638229612, 0.987309491940711, NA  
"19312", "AL731769.2", 0.102686272020481, -0.0533240139618846, 3.35247519753738, -0.0159058638229612, 0.987309491940711, NA  
"19313", "NLRP6", 0, NA, NA, NA, NA, NA, NA  
"19314", "AC136475.3", 0.0534622507802646, -0.0533240139618838, 3.35247519753738, -0.015905863822961, 0.987309491940711, NA  
"19315", "AC136475.8", 0, NA, NA, NA, NA, NA, NA  
"19316", "AC136475.7", 0.33713047520475, -2.38103637458962, 3.31815804257558, -0.71757774766552, 0.473017682228765, NA  
"19317", "AC136475.5", 1.20266573211048, 0.379874090353829, 1.32000882449569, 0.287781477899559, 0.773514016359875, NA  
"19318", "AC136475.9", 0.275489739162904, -0.333877366261583, 3.20869724067456, -0.104053870221608, 0.917126598293383, NA  
"19319", "B4GALNT4", 0.142120095111522, -0.0533240139618842, 3.35247519753738, -0.0159058638229611, 0.987309491940711, NA  
"19320", "AN09", 1.24666103349924, -0.984236989617338, 1.56787525652555, -0.627752103058526, 0.530166347320421, NA  
"19321", "AC138230.1", 0.601204396596941, 2.16260617821502, 1.80969535348619, 1.19501117911862, 0.232082662413638, NA  
"19322", "AC137894.3", 0.938373761112543, 1.13312108339726, 1.58594848759395, 0.714475339054882, 0.474933300116761, NA  
"19323", "LRR5C", 0.155693188003149, -0.774663427007578, 3.35247519753738, -0.231072082972193, 0.817258802814835, NA  
"19324", "LMNTD2", 0.349035219938887, 0.278666737377577, 2.58451989564205, 0.107821471155033, 0.914137310660263, NA  
"19325", "AP006284.1", 0.324574583169373, 1.31799784995945, 2.58063261725584, 0.510726649406209, 0.609542477387077, NA  
"19326", "RASSF7", 2.13354007622806, -0.90262330368626, 1.04701433008864, -0.862092597729627, 0.388636564439055, NA  
"19327", "CDHR5", 0.102686272020481, -0.0533240139618846, 3.35247519753738, -0.0159058638229612, 0.987309491940711, NA  
"19328", "SCT", 1.082864171791, -0.213644039497938, 1.48642169987897, -0.14373043633266, 0.885713336017285, NA  
"19329", "AC131934.1", 0.165319271277154, -0.774663427007578, 3.35247519753738, -0.231072082972193, 0.817258802814835, NA  
"19330", "PAN01", 2.08439870349901, 0.724948739263893, 1.04700850549912, 0.692400047808876, 0.488686135814215, NA  
"19331", "CRACR2B", 2.22759250748105, -1.12221449537273, 0.943895844831609, -1.18891771959535, 0.234472046577517, NA  
"19332", "AC136297.1", 0.437978565484534, -0.895665590143738, 2.16893773862828, -0.412951268352309, 0.679642317743024, NA  
"19333", "BRK2", 0.0644961186387932, -0.0533240139618838, 3.35247519753738, -0.015905863822961, 0.987309491940711, NA  
"19334", "AC091196.1", 0.11921983002294, -0.0533240139618846, 3.35247519753738, -0.0159058638229612, 0.987309491940711, NA  
"19335", "KRTAP5-AS1", 0.0534622507802646, -0.0533240139618838, 3.35247519753738, -0.015905

863822961,0.987309491940711,NA  
"19336","KRTAP5-2",0,NA,NA,NA,NA,NA  
"19337","AC068580.3",0,NA,NA,NA,NA,NA  
"19338","AC051649.1",0,NA,NA,NA,NA,NA  
"19339","PRR33",1.86348153644031,-0.182567335050205,1.29901697713566,-  
0.140542685941463,0.888231228645445,NA  
"19340","LINC01150",0.155693188003149,-0.774663427007578,3.35247519753  
738,-0.231072082972193,0.817258802814835,NA  
"19341","MRPL23-AS1",0,NA,NA,NA,NA,NA  
"19342","TH",0.156148522800746,0.494635591052761,3.34300496985029,0.14  
7961368742719,0.882373255878367,NA  
"19343","ASCL2",1.1890698730144,-0.450539482411038,1.48959881853717,-0  
.302456927868324,0.762303763305625,NA  
"19344","C11orf21",2.24099394842664,0.842398890257856,1.04509022622672  
,0.806053744564546,0.420211860744002,NA  
"19345","CD81-  
AS1",1.73197285303849,-0.154809601757968,1.25498820135708,-0.123355424  
051449,0.901825653865235,NA  
"19346","KCNQ1",2.17513675785633,-2.06158042436873,1.17685230303046,-1  
.75177498404859,0.079812507356128,NA  
"19347","KCNQ1-  
AS1",1.53368776604018,-0.943810772429387,1.32852370759321,-0.710420722  
667585,0.477443276370435,NA  
"19348","SLC22A18AS",0.694534719553943,-0.0424442720171517,1.893181097  
51497,-0.0224195519767575,0.982113284048999,NA  
"19349","AC131971.1",0.11921983002294,-0.0533240139618846,3.3524751975  
3738,-0.0159058638229612,0.987309491940711,NA  
"19350","MRGPRE",0.547313214584319,2.05806722495512,2.25487454581558,0  
.912719170463086,0.361390258822494,NA  
"19351","AC127526.5",0.347492639152484,1.36515954890128,3.017275334969  
29,0.452447787273339,0.650946427429436,NA  
"19352","AC127526.4",0,NA,NA,NA,NA,NA  
"19353","CHRNA10",0.832062315334533,-2.42756001898249,1.81680195137177  
, -1.33617206715876,0.181493038798048,NA  
"19354","AC090587.1",0.682508588480588,-0.577236287681617,1.9281737425  
8121,-0.299369436962087,0.764658179205218,NA  
"19355","LINC02749",2.13082729862061,0.681927021386028,0.9843188031513  
37,0.692790810459793,0.488440840027619,NA  
"19356","OR52K1",0,NA,NA,NA,NA,NA  
"19357","OR52I1",0.626606497181388,-1.49151781696109,1.98374720197906,  
-0.751868895125896,0.452129905334099,NA  
"19358","OR51E1",0.219614265997676,-1.35173207482145,3.35247519753738,  
-0.40320419844251,0.686798011343181,NA  
"19359","HBB",360.024750314837,-2.89421180611445,2.12496135997719,-1.3  
6200679251199,NA,NA  
"19360","HBG2",0.550736705647371,2.08540070258882,2.22472898431662,0.9  
37372919258926,0.348566765938519,NA  
"19361","OR51B5",0.403460020245984,1.56382911394003,2.91211969440415,0  
.537007155627923,0.591262671305975,NA  
"19362","OR51I2",0,NA,NA,NA,NA,NA



"19363", "OR52H1", 0.516363934578803, 1.05636042143757, 2.07457773648888, 0.509192980748656, 0.610616962679277, NA  
"19364", "OR56B1", 0.324137039266305, -0.0524131773797337, 2.65349229594242, -0.0197525266833754, 0.984240788704199, NA  
"19365", "OR52N4", 0.351730868692533, 1.42565098196998, 2.54019003026299, 0.561237925110027, 0.574635352232741, NA  
"19366", "OR52N5", 0, NA, NA, NA, NA, NA  
"19367", "OR52N1", 0, NA, NA, NA, NA, NA  
"19368", "AC022762.2", 0.543295970466385, -2.04613939225938, 2.25532942017395, -0.907246353440272, 0.364276536289549, NA  
"19369", "AC068733.3", 1.74869108252568, 0.72295850432989, 1.09622379850226, 0.659499004963809, 0.509575384834501, NA  
"19370", "HPX", 1.44210990583975, 0.572231415913987, 1.33139628342988, 0.42979796701838, 0.66734261186008, NA  
"19371", "AC091564.6", 0, NA, NA, NA, NA, NA  
"19372", "AC091564.4", 0.422668355858921, -2.6205236288258, 2.36866382348853, -1.10632990753679, 0.268583751419472, NA  
"19373", "AC091564.5", 0.876228029558987, -1.34561861291705, 1.5863113215134, -0.848268933511283, 0.396288214809101, NA  
"19374", "OR2AG2", 1.44057842850529, -1.95836851836557, 1.92605096616897, -1.01677917810289, 0.309258489547968, NA  
"19375", "OR2AG1", 0.338834096020616, -0.774667674034573, 2.96546850953071, -0.261229438635032, 0.793915577320881, NA  
"19376", "AC087280.2", 0.702981679514778, -0.504458464933077, 1.8616401702339, -0.270975279218269, 0.786410045502395, NA  
"19377", "AC107884.1", 0.958224107656594, -1.85781660226743, 1.58280983361167, -1.17374593132786, 0.24049680672018, NA  
"19378", "LM01", 0.100823152638361, -1.35173207482145, 3.35247519753738, -0.40320419844251, 0.686798011343181, NA  
"19379", "AC091053.1", 0.298268617912268, 1.11711823327978, 2.67902047659825, 0.416987568045118, 0.676687501005877, NA  
"19380", "AC026894.1", 1.63465192480584, -0.00875816487063864, 1.41071670335179, -0.0062083087623686, 0.995046518110252, NA  
"19381", "AC079296.1", 0.350898339321007, 1.45361411466565, 2.54576915420314, 0.570992115394946, 0.568004987527943, NA  
"19382", "AP006259.1", 0.74771606472042, 0.223056314210354, 1.99837116755295, 0.1116190614797, 0.911125457594599, NA  
"19383", "AC011092.2", 1.44731399502939, 0.372041937993891, 1.30536960691467, 0.285008886389837, 0.775637333806786, NA  
"19384", "AC011092.3", 0.205372544040962, 0.695830627438559, 3.33747149429751, 0.208490358233014, 0.834846110249776, NA  
"19385", "MRVI1-AS1", 0.477616316878645, 0.886585899913102, 2.08036470224268, 0.426168497743373, 0.669985070555511, NA  
"19386", "AC116535.1", 0.64810996365744, 0.322229350929814, 1.86493520631451, 0.172783134684129, 0.862821894224625, NA  
"19387", "AC069360.1", 1.77516223573097, 0.259091933834928, 1.27820301569461, 0.202700142820528, 0.839369411539413, NA  
"19388", "GALNT18", 0.233061356241168, -0.774663445836492, 3.35085807648355, -0.231183603767975, 0.817172167312465, NA

"19389", "LINC00958", 0, NA, NA, NA, NA, NA  
"19390", "AC021269.3", 0.505523547776327, -3.00137143189983, 2.57173918032  
013, -1.16705902949545, 0.24318653187626, NA  
"19391", "FAR1-  
IT1", 1.67876972061569, -0.562453233933756, 1.03177649021745, -0.545130887  
616189, 0.585663500521614, NA  
"19392", "PDE3B", 2.13270013235057, 0.228584550016635, 1.12826224053723, 0.  
202598776954365, 0.839448646027052, NA  
"19393", "CALCB", 0.11921983002294, -0.0533240139618846, 3.35247519753738,  
-0.0159058638229612, 0.987309491940711, NA  
"19394", "CALCA", 0.142120095111522, -0.0533240139618842, 3.35247519753738  
, -0.0159058638229611, 0.987309491940711, NA  
"19395", "INSC", 0, NA, NA, NA, NA, NA  
"19396", "AC073172.1", 0, NA, NA, NA, NA, NA  
"19397", "SOX6", 1.81276817040867, -0.0600248936024457, 1.36113577401904, -  
0.0440991227680465, 0.964825392035734, NA  
"19398", "PLEKHA7", 1.29855468531993, 1.10533006521042, 1.27705305924646, 0.  
.865531825171489, 0.386746956025064, NA  
"19399", "NCR3LG1", 1.27585694309558, -1.24766401718579, 1.4986557289727, -  
0.832522101684451, 0.405114308187411, NA  
"19400", "AC124798.1", 2.12523967579788, -0.287228591078877, 1.04188964885  
779, -0.275680434481484, 0.782793524526731, NA  
"19401", "ABCC8", 2.22269424840514, 0.362182021795508, 1.43328977610307, 0.  
252692810507749, 0.800505604011163, NA  
"19402", "SAA2", 0.608222486261352, -2.20716957687763, 1.98732700085538, -1.  
.11062224582448, 0.26673098319822, NA  
"19403", "AC084117.1", 1.36093264072129, 2.38723181987179, 1.4822782743509  
, 1.61051528662334, 0.107285410969152, NA  
"19404", "LDHAL6A", 0, NA, NA, NA, NA, NA  
"19405", "AC027544.2", 0.155693188003149, -0.774663427007578, 3.3524751975  
3738, -0.231072082972193, 0.817258802814835, NA  
"19406", "IGSF22", 2.11211925826317, 0.169391845661354, 1.01694546335459, 0.  
.166569252497162, 0.867708988606722, NA  
"19407", "PTPN5", 0, NA, NA, NA, NA, NA  
"19408", "MRGPRX2", 0, NA, NA, NA, NA, NA  
"19409", "E2F8", 0.102686272020481, -0.0533240139618846, 3.35247519753738,  
-0.0159058638229612, 0.987309491940711, NA  
"19410", "NAV2-  
IT1", 0.0534622507802646, -0.0533240139618838, 3.35247519753738, -0.015905  
863822961, 0.987309491940711, NA  
"19411", "AC009549.1", 2.23917647834242, -1.24444888462897, 0.958543059122  
141, -1.29827123861152, 0.194194145986283, NA  
"19412", "NAV2-  
AS2", 0.102230937222884, -1.35173207482145, 3.35247519753738, -0.403204198  
442509, 0.686798011343181, NA  
"19413", "NAV2-  
AS1", 1.06950803167304, -0.952909616512389, 1.75736634035344, -0.542237321  
058932, 0.587655028242334, NA  
"19414", "AN05", 0.305740361881726, -1.38485840137887, 2.64966120810703, -0.  
.52265489532839, 0.601214431685811, NA

"19415", "AC006299.1", 0, NA, NA, NA, NA, NA  
"19416", "AN03", 0.102686272020481, -0.0533240139618846, 3.35247519753738, -0.0159058638229612, 0.987309491940711, NA  
"19417", "AC100771.2", 1.24407523368342, -0.038504897190495, 1.27838575327646, -0.0301199360926921, 0.975971401240577, NA  
"19418", "AC013714.1", 0, NA, NA, NA, NA, NA  
"19419", "MPPED2", 0.712800991391144, -3.49175105082626, 2.28593309239247, -1.52749486082804, 0.126638004173719, NA  
"19420", "DCDC1", 0.567080287016188, -0.0294766078413879, 1.93541911249617, -0.0152300902946912, 0.98784861585975, NA  
"19421", "AC131571.1", 0.795196672425186, -0.608090000108147, 1.69295186200488, -0.359189185325101, 0.719453566411981, NA  
"19422", "PAX6", 0.790230058768963, 0.71167206645835, 1.79477702731191, 0.396523944550505, 0.691718547217048, NA  
"19423", "WT1", 1.65658071688044, -2.42822960769408, 3.19492214963948, -0.760027785956566, 0.447237976139196, NA  
"19424", "WT1-AS", 0.505695712807125, -2.90223896060942, 3.11816310694988, -0.930752773689357, 0.351981463997368, NA  
"19425", "CCDC73", 0.100823152638361, -1.35173207482145, 3.35247519753738, -0.40320419844251, 0.686798011343181, NA  
"19426", "PRRG4", 1.40695634493418, -1.08491606094755, 1.31436414461988, -0.825430353824291, 0.409127307956121, NA  
"19427", "CSTF3-DT", 0, NA, NA, NA, NA, NA  
"19428", "AC090469.1", 2.00339085040074, 0.236592529570094, 1.01198452254762, 0.233790660132315, 0.815147500800991, NA  
"19429", "EHF", 0.102686272020481, -0.0533240139618846, 3.35247519753738, -0.0159058638229612, 0.987309491940711, NA  
"19430", "AL136146.2", 0.273076516777941, -0.774665331385065, 3.18476194606587, -0.243241204367569, 0.807818548712931, NA  
"19431", "RAG1", 0.991766879791616, -0.2817304039184, 1.51441747795784, -0.186032192588207, 0.852419515930097, NA  
"19432", "AC068205.2", 0.869457328881929, -0.086474456700747, 1.46630093429937, -0.0589745629140354, 0.952972368692544, NA  
"19433", "AC087521.2", 1.51537223755725, 1.38873801521332, 1.3163712569589, 1.05497442903881, 0.291437019811198, NA  
"19434", "ALKBH3-AS1", 0.221906102043421, 0.695830468846429, 3.33747149841039, 0.208490310457437, 0.834846147549618, NA  
"19435", "AC087521.1", 1.0033847856352, 0.0520146957967495, 1.86096963588294, 0.0279503194430526, 0.977701774989225, NA  
"19436", "AC134775.1", 0.23843966004588, 0.69583062743856, 3.33747149429751, 0.208490358233014, 0.834846110249776, NA  
"19437", "ALX4", 0.165319271277154, -0.774663427007578, 3.35247519753738, -0.231072082972193, 0.817258802814835, NA  
"19438", "LINC02696", 1.50194654171928, 1.27748866619956, 1.25999785450959, 1.01388162021655, 0.31063924257554, NA  
"19439", "LARGE2", 0.100823152638361, -1.35173207482145, 3.35247519753738, -0.40320419844251, 0.686798011343181, NA  
"19440", "LRP4-

AS1",0.883122837822897,-1.63495644467074,1.64043271298809,-0.996661692  
811909,0.318928749668949,NA  
"19441","AC090589.3",0,NA,NA,NA,NA,NA  
"19442","AC018410.1",0.102230937222884,-1.35173207482145,3.35247519753  
738,-0.403204198442509,0.686798011343181,NA  
"19443","MYBPC3",0.257924125226034,-1.38354199007994,3.26926698797967,  
-0.423196390862814,0.672151979809054,NA  
"19444","AC090559.1",0.757461853841094,0.0154219545675286,1.7262249698  
2671,0.00893391929620666,0.992871858548224,NA  
"19445","RAPSN",0.742791415220756,0.728420315617635,1.97098316055561,0  
.369572064437271,0.71170136898288,NA  
"19446","KF459542.1",0,NA,NA,NA,NA,NA  
"19447","AGBL2",1.6884890965485,1.20942036514828,1.27419303918782,0.94  
9165729173324,0.342536328716012,NA  
"19448","AC109635.7",0.102686272020481,-0.0533240139618846,3.352475197  
53738,-0.0159058638229612,0.987309491940711,NA  
"19449","OR8H1",0,NA,NA,NA,NA,NA  
"19450","APLNR",0.431061540826835,0.656814348572944,2.16549121380705,0  
.303309634500077,0.761653904548918,NA  
"19451","AP000781.1",0.875432675155963,1.76704222400355,1.556077088496  
51,1.13557498986819,0.256134480927691,NA  
"19452","SMTNL1",0.102686272020481,-0.0533240139618846,3.3524751975373  
8,-0.0159058638229612,0.987309491940711,NA  
"19453","BTBD18",0.341125932066361,1.37790492328387,3.03290540471936,0  
.454318463457443,0.649599628836418,NA  
"19454","OR5B2",0,NA,NA,NA,NA,NA  
"19455","AP003557.2",0.0534622507802646,-0.0533240139618838,3.35247519  
753738,-0.015905863822961,0.987309491940711,NA  
"19456","AP001350.1",0,NA,NA,NA,NA,NA  
"19457","CNTF",0.102686272020481,-0.0533240139618846,3.35247519753738,  
-0.0159058638229612,0.987309491940711,NA  
"19458","GLYATL2",1.9609331986731,-3.54422795049424,1.46157504966249,-  
2.42493736555827,0.0153110280974989,NA  
"19459","AP001636.3",0,NA,NA,NA,NA,NA  
"19460","FAM111B",1.29082130217766,-0.880617413813208,1.41942957744211  
, -0.620402327673156,0.534992940344616,NA  
"19461","OR4D9",0.286402220682214,1.17253773374183,2.71767620516714,0.  
431448651429658,0.666142181249859,NA  
"19462","AP003778.1",1.78993553764766,1.59425210015668,1.3264578534034  
3,1.20188673621717,0.229407414036196,NA  
"19463","AP000442.1",1.84140710122117,0.0642083195334933,1.14900453414  
266,0.0558816937840921,0.955436054282987,NA  
"19464","AP000640.2",0.290640450222262,1.25033941279685,2.654597837409  
76,0.471008977396319,0.637634324027243,NA  
"19465","AP000640.1",1.01496736214341,0.104252658677122,1.711955844840  
19,0.0608968151785796,0.951441385859765,NA  
"19466","MS4A6E",0,NA,NA,NA,NA,NA  
"19467","MS4A14",0.56028486326644,-0.809925366337461,2.32472142109018,  
-0.348396740783523,0.727542249871904,NA  
"19468","MS4A1",0.593550367148464,0.217175534445887,2.05099363467328,0

.105887961217628,0.915671245922042,NA  
"19469","PTGDR2",0.355136568861056,1.5186996579252,2.47780648520542,0.  
612921011787285,0.539928569196643,NA  
"19470","AP003721.4",0,NA,NA,NA,NA,NA  
"19471","AP003721.1",0,NA,NA,NA,NA,NA  
"19472","PGA3",0,NA,NA,NA,NA,NA  
"19473","PGA5",0.155693188003149,-0.774663427007578,3.35247519753738,-  
0.231072082972193,0.817258802814835,NA  
"19474","AP003108.1",0.739652883565325,0.481733743233409,1.63418598741  
999,0.294785138865349,0.768158019714251,NA  
"19475","AP003559.1",0,NA,NA,NA,NA,NA  
"19476","MYRF",0.723255427950906,1.19448678306064,1.98063644443831,0.6  
03082300345831,0.546453940455705,NA  
"19477","AP002793.1",0.102686272020481,-0.0533240139618846,3.352475197  
53738,-0.0159058638229612,0.987309491940711,NA  
"19478","ASRGL1",1.40274233034576,0.547931451862915,1.31427551419357,0  
.416907601142612,0.676745993522985,NA  
"19479","AP001363.2",0.0534622507802646,-0.0533240139618838,3.35247519  
753738,-0.015905863822961,0.987309491940711,NA  
"19480","LBHD1",1.75761480553943,0.317503323656422,1.0856735540757,0.2  
92448243272107,0.769943926764916,NA  
"19481","GNG3",0,NA,NA,NA,NA,NA  
"19482","LGALS12",1.79732845864441,-3.17314475177184,1.3310141984026,-  
2.38400518610549,0.0171253610290863,NA  
"19483","PLAAT2",0.622843201081641,2.2503639572513,1.89804848134221,1.  
18561985079535,0.23577245929684,NA  
"19484","FLRT1",0.257984474555173,1.13858698981479,3.32517364251053,0.  
342414295379519,0.732039131850101,NA  
"19485","AP006333.1",0.861513181910147,-0.643137119973831,1.5295960030  
0308,-0.420462081955726,0.674147923882285,NA  
"19486","AP001453.1",1.72065682777403,-0.108253497120124,1.20284840360  
381,-0.0899976229720965,0.928289103758051,NA  
"19487","AP001453.3",0,NA,NA,NA,NA,NA  
"19488","AP001453.2",0.413120198239852,0.610630740268671,2.45617295473  
343,0.248610644088353,0.803661974175172,NA  
"19489","KCNK4",1.34107716478356,-0.0643500280998819,1.38055008710751,  
-0.0466118750060754,0.962822567432598,NA  
"19490","AP003774.2",0,NA,NA,NA,NA,NA  
"19491","LINC02723",0,NA,NA,NA,NA,NA  
"19492","LINC02724",0,NA,NA,NA,NA,NA  
"19493","SLC22A11",0.167182390659274,0.576034712544328,3.3406888073985  
2,0.172429922616139,0.863099549623161,NA  
"19494","CDC42BPG",0.733953666858507,-0.0709028963447902,1.75140911046  
989,-0.0404833433381922,0.967707786245649,NA  
"19495","MIR194-2HG",0.494751533659342,2.00034352874731,2.230820954808  
26,0.896684928674266,0.36988706501543,NA  
"19496","CDCA5",1.30208177182767,0.484875791255848,1.34599089205181,0.  
360237052211186,0.718669868458001,NA  
"19497","TMEM262",0.388179503600051,-2.37645961319578,2.86395305033592  
,-0.829783020680815,0.406661472415033,NA

"19498", "AP003068.1", 0.473850264686505, -2.88231113886872, 2.24824007876484, -1.28202996027552, 0.199832136514602, NA  
"19499", "AP000944.7", 2.25348637912421, 1.66263659136407, 1.13196442806613, 1.46880639544879, 0.141885308907312, NA  
"19500", "TIGD3", 0.779222809044406, 1.27597726781148, 1.7965288538042, 0.710245908441473, 0.47755165661017, NA  
"19501", "AP000769.2", 0.540480401297337, -2.03594877027212, 2.25723965615147, -0.901963938443005, 0.367076024392447, NA  
"19502", "KCNK7", 0.869932985012033, 1.7620849831828, 1.63503758919967, 1.07770304170519, 0.281166300629468, NA  
"19503", "OVOL1", 0, NA, NA, NA, NA, NA  
"19504", "OVOL1-AS1", 0.0534622507802646, -0.0533240139618838, 3.35247519753738, -0.015905863822961, 0.987309491940711, NA  
"19505", "TSGA10IP", 0, NA, NA, NA, NA, NA  
"19506", "CST6", 0.102230937222884, -1.35173207482145, 3.35247519753738, -0.403204198442509, 0.686798011343181, NA  
"19507", "CATSPER1", 0.523491508497282, -2.97432464345697, 2.19739711929653, -1.35356718971633, 0.175874500514454, NA  
"19508", "AP001107.4", 1.29041599277794, 2.42744278030533, 1.4507208135537, 1.67326666690543, 0.0942748113534356, NA  
"19509", "AP001107.7", 0.327569143000068, 1.43149619843656, 2.55839159377899, 0.559529745922164, 0.575800236269956, NA  
"19510", "AP001107.1", 1.18464840803238, 0.0877150170268883, 1.46248670104201, 0.0599766254041093, 0.952174251393798, NA  
"19511", "CNIH2", 0.87864125194395, -0.980720081278045, 1.54702967025293, -0.63393747394496, 0.526121628304443, NA  
"19512", "SLC29A2", 0.77681266150515, -1.006972264105, 1.66519339013237, -0.604717908485665, 0.54536644686034, NA  
"19513", "AP002748.6", 0.425081578243885, -1.97346166162085, 2.13397687057399, -0.924781186166291, 0.355079738872656, NA  
"19514", "ACTN3", 0.165319271277154, -0.774663427007578, 3.35247519753738, -0.231072082972193, 0.817258802814835, NA  
"19515", "SPTBN2", 0.710470669971036, 1.09735532393424, 2.24886091301889, 0.487960512622875, 0.625577810926788, NA  
"19516", "AP001885.3", 0, NA, NA, NA, NA, NA  
"19517", "AP003419.2", 1.01918372888774, -2.05992646572026, 1.57107346600185, -1.31115858697714, 0.189804190493965, NA  
"19518", "AP003419.3", 0.889084988803003, -1.12921437938687, 1.85785979763179, -0.607803872405373, 0.543317560667306, NA  
"19519", "CARNS1", 0.707527239379232, 1.45751776047715, 1.96767888156134, 0.740729482912691, 0.458857479221459, NA  
"19520", "RPS6KB2-AS1", 0, NA, NA, NA, NA, NA  
"19521", "PTPRCAP", 0.142120095111522, -0.0533240139618842, 3.35247519753738, -0.0159058638229611, 0.987309491940711, NA  
"19522", "CABP4", 0.737508644000684, 0.283375978352328, 1.82690570990829, 0.155112536358843, 0.876732599218307, NA  
"19523", "ACY3", 0, NA, NA, NA, NA, NA  
"19524", "LINC02754", 0.102686272020481, -0.0533240139618846, 3.35247519753738, -0.0159058638229612, 0.987309491940711, NA

"19525", "AC004923.4", 0.360155062448918, -1.78089833603962, 2.94296306436511, -0.605137848178811, 0.545087408047316, NA  
"19526", "AP002992.1", 0.333068833143998, 1.42375702813584, 3.01161596023067, 0.472755174277528, 0.636387857943779, NA  
"19527", "AP003096.1", 0.364026197154943, 1.40568518917529, 2.5808230723278, 0.544665461281472, 0.585983623575459, NA  
"19528", "TESMIN", 0.322273919884185, -1.38549380438952, 2.60912169626995, -0.531019233932344, 0.595405450737739, NA  
"19529", "LINC02701", 0.0534622507802646, -0.0533240139618838, 3.35247519753738, -0.015905863822961, 0.987309491940711, NA  
"19530", "SMIM38", 0.100823152638361, -1.35173207482145, 3.35247519753738, -0.40320419844251, 0.686798011343181, NA  
"19531", "MYE0V", 1.82520346308424, -2.80025768759668, 1.21821247048501, -2.29866115759085, 0.0215241878047425, NA  
"19532", "AP000879.1", 0.206616213750315, 0.576034718369261, 3.3406888072366, 0.172429924368129, 0.863099548245903, NA  
"19533", "AP002336.2", 0, NA, NA, NA, NA, NA  
"19534", "AP002336.1", 0.94072414819778, -1.00670204764944, 1.53802836277277, -0.65454062617841, 0.512763562139207, NA  
"19535", "AP000487.2", 0.503724650634145, -1.81008828864611, 2.72203511859676, -0.664976096847432, 0.506065781782085, NA  
"19536", "SHANK2", 0.205372544040962, 0.695830627438559, 3.33747149429751, 0.208490358233014, 0.834846110249776, NA  
"19537", "KRTAP5-7", 0.372554934700236, 1.53298501045004, 2.9440309590516, 0.520709541364294, 0.602569126651357, NA  
"19538", "KRTAP5-8", 1.02518862911211, 0.43597228561955, 1.48048415197365, 0.29447953565619, 0.768391498704405, NA  
"19539", "KRTAP5-9", 0.30528502708413, -2.35094355977522, 3.02528291170748, -0.777098746922923, 0.437100513227499, NA  
"19540", "KRTAP5-10", 0.754740309479177, -1.33532375796741, 2.15510122533961, -0.61961069033172, 0.535514126864028, NA  
"19541", "ZNF705E", 0.589473337375535, 0.305162443321506, 1.99651185856259, 0.152847799031462, 0.878518302395836, NA  
"19542", "FOLR3", 1.57728519351646, -0.431579057856019, 1.71277919565353, -0.251975887464785, 0.801059701596645, NA  
"19543", "FOLR1", 0.46289359979311, 1.88189894892017, 2.75923960460208, 0.682035349804846, 0.495216598601473, NA  
"19544", "AP000593.4", 0.672718604900145, -1.58319472558796, 1.81461587748909, -0.872468242578505, 0.382952985720508, NA  
"19545", "LINC01537", 0, NA, NA, NA, NA, NA  
"19546", "PDE2A", 1.43616606333377, -1.93051041709632, 1.43223281543357, -1.34790265681206, 0.177689693465824, NA  
"19547", "AP005019.1", 0.100823152638361, -1.35173207482145, 3.35247519753738, -0.40320419844251, 0.686798011343181, NA  
"19548", "ARAP1-AS1", 0.102230937222884, -1.35173207482145, 3.35247519753738, -0.403204198442509, 0.686798011343181, NA  
"19549", "AP003065.2", 0, NA, NA, NA, NA, NA  
"19550", "ARAP1-AS2", 0.244351032334407, -0.774664026145693, 3.30062972833046, -0.23470188

7187309,0.814440122883676,NA  
"19551","P2RY2",0.102230937222884,-1.35173207482145,3.35247519753738,-  
0.403204198442509,0.686798011343181,NA  
"19552","P2RY6",0.800817748908335,-1.64962949161886,1.63534683848961,-  
1.00873371494847,0.313102357949951,NA  
"19553","AP002761.3",2.23064207764217,0.023369552074578,1.015330272874  
6,0.0230166997861832,0.981636951974924,NA  
"19554","AP000763.4",0,NA,NA,NA,NA,NA  
"19555","AP000763.3",0.220644641439539,0.945449760607245,2.90117912387  
055,0.325884655941509,0.744511625317288,NA  
"19556","PLEKHB1",0.779559832348491,1.48846238499028,1.93250149976452,  
0.770225733419432,0.441166001626432,NA  
"19557","DNAJB13",0.461888884682472,-0.261206259066425,2.1654305904116  
4,-0.120625551436756,0.903987629498604,NA  
"19558","AP003717.4",0.274913018026089,-0.226100793799534,2.7407223210  
9206,-0.0824967900102491,0.934251670836265,NA  
"19559","UCP3",2.28106211957694,-0.790330043691803,0.937573338225321,-  
0.842952771233634,0.399254858138803,NA  
"19560","AP001372.3",0.244351032334407,-0.774664026145693,3.3006297283  
3046,-0.234701887187309,0.814440122883676,NA  
"19561","CHRD12",0.883667840622925,1.04747716979095,1.9851282868859,0.  
527662205365149,0.597733809762699,NA  
"19562","AP001992.2",2.0871134883978,-0.559064900417172,1.072884106768  
13,-0.521086011891119,0.60230685490702,NA  
"19563","AP001972.3",0.310685332713897,-0.774666839538346,3.0453962482  
8073,-0.254373085267864,0.799207342088715,NA  
"19564","AP002815.1",0,NA,NA,NA,NA,NA  
"19565","AP001922.5",1.14470682580437,2.31557259941227,1.4666567559431  
6,1.57881016811135,0.114379605622214,NA  
"19566","DGAT2",1.79609471291973,0.915139478724609,1.2577002682367,0.7  
2762923077661,0.466840582070295,NA  
"19567","UVRAG-  
DT",0.592580126467008,1.22843588411999,1.83355349762724,0.669975479695  
402,0.502873421382462,NA  
"19568","AP003168.2",2.30003438741645,0.645655356670565,1.030392132409  
09,0.626611302981323,0.530914057384147,NA  
"19569","LINC02757",1.44399156897305,-0.768598469643673,1.177091000646  
15,-0.652964358084259,0.513779256537737,NA  
"19570","AP001189.1",0.102686272020481,-0.0533240139618846,3.352475197  
53738,-0.0159058638229612,0.987309491940711,NA  
"19571","B3GNT6",0.100823152638361,-1.35173207482145,3.35247519753738,  
-0.40320419844251,0.686798011343181,NA  
"19572","MYO7A",1.75093887306762,0.253424309483876,1.09577280947522,0.  
231274500783829,0.817101555151487,NA  
"19573","AP003680.1",0.801690306276492,-1.10555451869204,1.86890600144  
992,-0.591551698070604,0.554150826627048,NA  
"19574","RSF1-  
IT2",0.918135050057743,2.76504439955895,1.84951460723095,1.49501084703  
446,0.134911611284537,NA  
"19575","RSF1-



IT1",0.231223174500471,-0.207595008908767,3.34245142718562,-0.06210860  
9034766,0.950476341218052,NA  
"19576","AP002812.2",0.204917209243366,-0.774663427007578,3.3524751975  
3738,-0.231072082972194,0.817258802814834,NA  
"19577","AP002812.3",0.193488355916379,0.860398995964988,3.33340328940  
337,0.258114281791264,0.796318709677277,NA  
"19578","AP002812.5",0.182454488057851,0.814003878402388,3.33451052748  
657,0.244114952312343,0.80714179253596,NA  
"19579","KCTD14",1.37276454237678,-0.252111084386183,1.19839397142396,  
-0.210374126036882,0.833375685218142,NA  
"19580","LINC02728",0.867306468359579,2.77997538612418,1.9621433321895  
9,1.41680545988552,0.15653981296661,NA  
"19581","FAM181B",0.386926462243525,1.51070939514628,2.94063395657504,  
0.513735955394397,0.607436610092053,NA  
"19582","AP000873.4",0.296174627936861,1.27438179873717,3.126245094402  
82,0.407639759601319,0.683538169730386,NA  
"19583","AP000446.1",0.502891906693888,-0.600720614093688,2.1093210894  
1053,-0.284793347541774,0.775802469164121,NA  
"19584","AP001825.1",0.156148522800746,0.494635591052761,3.34300496985  
029,0.147961368742719,0.882373255878367,NA  
"19585","CCDC81",2.25106195663558,1.03863058691464,1.01511310535115,1.  
02316735094791,0.306228726927006,NA  
"19586","AP003059.1",2.13546474570502,0.802917150565158,1.030914132300  
9,0.778839988130848,0.436073978666291,NA  
"19587","AP003059.2",0.258834794821227,1.09609913055011,3.271126248508  
28,0.335083102050849,0.737562399373167,NA  
"19588","AP000654.1",0.651559858285732,1.35796367111569,1.953127238568  
91,0.695276602721847,0.486881974162334,NA  
"19589","RAB38",0.901083107389229,-0.231597931319208,1.91257997794792,  
-0.12109189366695,0.903618249844818,NA  
"19590","GRM5-AS1",0,NA,NA,NA,NA,NA  
"19591","GRM5",0.571664367099765,1.0348733724577,1.97782187765353,0.52  
3238914560631,0.60080800408126,NA  
"19592","FAT3",2.28598853020329,3.41729812540716,1.46345828144203,2.33  
508407362314,0.0195390291493367,NA  
"19593","SCARNA9",0.0644961186387932,-0.0533240139618838,3.35247519753  
738,-0.015905863822961,0.987309491940711,NA  
"19594","HEPHL1",0.201646305276721,-1.9490730241217,3.3359781915796,-0  
.584258323103367,0.559046527482917,NA  
"19595","GPR83",0.835739369023701,0.166250022602249,2.19184880826141,0  
.0758492200628196,0.939539056930734,NA  
"19596","AP000786.1",0.373937781643337,-0.0392211674210207,2.935285113  
74742,-0.0133619617519703,0.989339014256,NA  
"19597","AP000943.2",0.0644961186387932,-0.0533240139618838,3.35247519  
753738,-0.015905863822961,0.987309491940711,NA  
"19598","AP000779.1",0,NA,NA,NA,NA,NA  
"19599","AP001351.1",0.313540715310845,1.26351236233866,2.597736835073  
7,0.486389670146404,0.62669091310095,NA  
"19600","TRPC6",0.100823152638361,-1.35173207482145,3.35247519753738,-  
0.40320419844251,0.686798011343181,NA

"19601", "AP001527.1", 0.367431897323466, 1.50566789164441, 2.92412615522586, 0.514912083718944, 0.606614456484223, NA  
"19602", "AP000942.2", 0.568350574859514, 0.492232392781344, 2.33331111763957, 0.210958748304126, 0.832919460997074, NA  
"19603", "MMP7", 0.943477175619438, -3.86982039198701, 1.84253482186664, -2.100269881503, 0.0357051071342087, NA  
"19604", "DDI1", 0.102686272020481, -0.0533240139618846, 3.35247519753738, -0.0159058638229612, 0.987309491940711, NA  
"19605", "CASP5", 0.0644961186387932, -0.0533240139618838, 3.35247519753738, -0.015905863822961, 0.987309491940711, NA  
"19606", "ELMOD1", 0, NA, NA, NA, NA, NA  
"19607", "SLN", 0.375307454000825, -1.51672328914404, 2.50822563158042, -0.604699700875141, 0.545378546938903, NA  
"19608", "RAB39A", 0.142120095111522, -0.0533240139618842, 3.35247519753738, -0.0159058638229611, 0.987309491940711, NA  
"19609", "AP002433.2", 0.209155438783414, -0.335374473295219, 3.34626863491525, -0.10022341595528, 0.920166956363588, NA  
"19610", "AP001981.2", 0.309302485770796, 1.17088912763199, 2.66183894910263, 0.439879778611974, 0.660024182340411, NA  
"19611", "AP003973.2", 0.807441928704133, 2.70181686810874, 2.03292131909697, 1.32903169578098, 0.183837513096354, NA  
"19612", "POU2AF1", 1.30637282964358, 2.49998511221642, 1.41841119848026, 1.76252493980236, 0.0779806464415758, NA  
"19613", "ALG9-IT1", 1.31056047435247, 0.0188269425257949, 1.30272114207949, 0.0144520127275605, 0.988469363556296, NA  
"19614", "AP000907.2", 0.3088471509732, -0.151783800255383, 2.666328088474, -0.0569261528284959, 0.954604021144224, NA  
"19615", "TEX12", 1.19212876467255, -0.302301068445963, 1.40295981819497, -0.215473789431046, 0.829397945120383, NA  
"19616", "LINC02763", 1.84017513973655, 0.314073610683098, 1.18137889966788, 0.265853411442673, 0.790352106471306, NA  
"19617", "AP003100.2", 0.589980552104771, 0.0582533187026548, 2.10554825012701, 0.0276665798084375, 0.977928078943754, NA  
"19618", "AP000802.1", 0, NA, NA, NA, NA, NA  
"19619", "ANKK1", 0.602465857200823, 2.16140165930903, 2.28785713317083, 0.944727547875099, 0.344797989196728, NA  
"19620", "TMPRSS5", 1.52906583055601, 0.299095753518039, 1.29186808233474, 0.231521900423064, 0.816909373489084, NA  
"19621", "AP002755.1", 0.902693493382346, -1.21287870619094, 1.8528184913105, -0.654612803077691, 0.512717078827985, NA  
"19622", "AP002518.2", 0, NA, NA, NA, NA, NA  
"19623", "AP002518.1", 0.100823152638361, -1.35173207482145, 3.35247519753738, -0.40320419844251, 0.686798011343181, NA  
"19624", "NXPE1", 1.86013198169207, -0.471953068918481, 1.41001300713569, -0.334715400872229, 0.737839782722412, NA  
"19625", "NXPE2", 1.88691363936593, -0.541436849163725, 1.22556659770529, -0.441784926398526, 0.658644847300619, NA  
"19626", "AP000462.2", 0.102686272020481, -0.0533240139618846, 3.35247519753738, -0.0159058638229612, 0.987309491940711, NA

"19627", "AP006216.1", 0, NA, NA, NA, NA, NA  
"19628", "APOA1", 1.19303796834393, 0.931809768704056, 1.40208033556127, 0.66459085479652, 0.506312220153936, NA  
"19629", "AP000892.3", 0.662715112483479, 0.223699928761422, 1.66682183238716, 0.134207462618273, 0.893238524984438, NA  
"19630", "DSCAML1", 2.25703444263264, 3.21212144614341, 1.36272656091916, 2.35712837649311, 0.0184168787654912, NA  
"19631", "AP001554.1", 0.102686272020481, -0.0533240139618846, 3.35247519753738, -0.0159058638229612, 0.987309491940711, NA  
"19632", "TMPRSS13", 0, NA, NA, NA, NA, NA  
"19633", "SMIM35", 0, NA, NA, NA, NA, NA  
"19634", "TMPRSS4", 0, NA, NA, NA, NA, NA  
"19635", "SCN4B", 1.39394874275758, 0.465960743052711, 1.40840510269214, 0.330842839295338, 0.740763200239731, NA  
"19636", "MPZL3", 1.46679059077284, -0.282875813282022, 1.20607051461609, -0.234543345396405, 0.81456318669153, NA  
"19637", "MPZL2", 0, NA, NA, NA, NA, NA  
"19638", "AP001267.4", 0.142120095111522, -0.0533240139618842, 3.35247519753738, -0.0159058638229611, 0.987309491940711, NA  
"19639", "AP001267.2", 0.271251509622856, -0.774665352300728, 3.18287089738686, -0.243385728568736, 0.8077065984266, NA  
"19640", "TTC36", 0.438824504718719, -0.383487289287046, 2.16986111602145, -0.176733564399822, 0.859717675272974, NA  
"19641", "TREH", 1.88416642521426, 0.38120608785171, 1.19048294733694, 0.320211296351999, 0.748808160434606, NA  
"19642", "AP002954.1", 0, NA, NA, NA, NA, NA  
"19643", "AP002954.2", 0.275368352823686, 1.11865680170283, 2.73977894622596, 0.408301846119294, 0.683052084109357, NA  
"19644", "AP004609.1", 0, NA, NA, NA, NA, NA  
"19645", "UPK2", 0.860105397325623, -0.636633524589683, 1.66767774477963, -0.381748528204896, 0.702647900868507, NA  
"19646", "AP003392.1", 0.221450767245824, -0.774663427007578, 3.35247519753738, -0.231072082972194, 0.817258802814834, NA  
"19647", "AP003392.3", 0.142120095111522, -0.0533240139618842, 3.35247519753738, -0.0159058638229611, 0.987309491940711, NA  
"19648", "AP003392.4", 0.968893018268273, 0.351446524507822, 1.4758520174036, 0.238131276282094, 0.811779277399474, NA  
"19649", "ABCG4", 0, NA, NA, NA, NA, NA  
"19650", "PDZD3", 0.220644641439539, 0.945449760607245, 2.90117912387055, 0.325884655941509, 0.744511625317288, NA  
"19651", "MCAM", 2.15633283491209, -0.281887655582162, 0.965137962060882, -0.292069804176224, 0.770233253356342, NA  
"19652", "C1QTNF5", 0.984719834978609, 0.133324049172403, 1.56887120772324, 0.0849808757507151, 0.932276594642853, NA  
"19653", "USP2-AS1", 1.85440654782169, -0.775105214200355, 1.0661791474188, -0.726993410138314, 0.467229992652913, NA  
"19654", "AP003393.1", 0.209155438783414, -0.335374473295219, 3.34626863491525, -0.10022341595528, 0.920166956363588, NA  
"19655", "POU2F3", 1.78232685680736, 1.79917802578596, 1.5686425063531, 1.1

4696498309792,0.251396093491426,NA  
"19656","GRIK4",0.542489844660099,-0.49110510939157,1.89948307403433,-  
0.25854671521158,0.795985000565756,NA  
"19657","AP000977.1",0,NA,NA,NA,NA,NA  
"19658","AP001977.1",0.273076516777941,-0.774665331385065,3.1847619460  
6587,-0.243241204367569,0.807818548712931,NA  
"19659","BLID",0.836628411100226,-0.374633821537774,1.84453122053146,-  
0.203105166975613,0.839052833239325,NA  
"19660","AP002762.3",0.298268617912268,1.11711823327978,2.679020476598  
25,0.416987568045118,0.676687501005877,NA  
"19661","SCN3B",0.386471127445929,-0.0386990368869363,2.94818440181732  
, -0.0131263963214382,0.989526951792023,NA  
"19662","OR8D4",0.32333091346002,1.36964301339487,2.59252250820019,0.5  
2830515803148,0.597287552165004,NA  
"19663","NRGN",2.24022545236654,-1.6944131587536,1.24234319426303,-1.3  
6388492855933,0.172603784975296,NA  
"19664","VSIG2",0,NA,NA,NA,NA,NA  
"19665","AP003501.2",0.890651112877671,0.0583095036904005,1.9588860415  
6447,0.0297666645497312,0.976253144814878,NA  
"19666","HEPACAM",0.573181635938357,1.09682742959986,1.86407379490847,  
0.588403437994641,0.556261530658705,NA  
"19667","HEPN1",1.39661414872088,0.203871608783569,1.33137651939164,0.  
15312843948662,0.878296988885985,NA  
"19668","CCDC15-  
DT",2.32027420087037,0.790548891255534,1.08485704319877,0.728712502916  
101,0.466177543133167,NA  
"19669","SLC37A2",1.26751264175796,-0.636167672998198,1.3240463023975,  
-0.480472376114237,0.630891540973411,NA  
"19670","AP000708.1",1.00179893450607,0.279487804892594,1.668818593289  
57,0.167476444723491,0.866995180147385,NA  
"19671","AP000842.2",1.09879074515799,-1.87076926053522,1.601029995059  
48,-1.16847858335453,0.242613773123763,NA  
"19672","DDX25",1.18092652190579,-4.09904462214374,2.05948464179036,-1  
.99032541392508,0.0465551002216806,NA  
"19673","AP001893.1",0.0534622507802646,-0.0533240139618838,3.35247519  
753738,-0.015905863822961,0.987309491940711,NA  
"19674","AP001318.2",1.09679453077486,-1.66930576553847,1.420901843389  
02,-1.17482131035665,0.24006621251906,NA  
"19675","KIRREL3",0.32184520322056,-2.1004006767475,3.00004113479613,-  
0.70012395909706,0.483849894373614,NA  
"19676","AP002833.1",0,NA,NA,NA,NA,NA  
"19677","LINC02725",0.0644961186387932,-0.0533240139618838,3.352475197  
53738,-0.015905863822961,0.987309491940711,NA  
"19678","KCNJ1",0,NA,NA,NA,NA,NA  
"19679","C11orf45",1.87474064558696,0.503320658516084,1.10197232445426  
,0.456745280572585,0.647854140475852,NA  
"19680","TP53AIP1",0,NA,NA,NA,NA,NA  
"19681","AP003327.2",0,NA,NA,NA,NA,NA  
"19682","TMEM45B",0.142120095111522,-0.0533240139618842,3.352475197537  
38,-0.0159058638229611,0.987309491940711,NA

"19683", "LINC00167", 0.852502167277041, 0.398411088505131, 1.662150702738  
56, 0.239696128545209, 0.810565836440475, NA  
"19684", "ST14", 2.00065201485746, -3.74613159527892, 1.42381617861539, -2.  
63105002706311, 0.00851215049191023, NA  
"19685", "ZBTB44-  
DT", 0.351730868692533, 1.42565098196998, 2.54019003026299, 0.561237925110  
027, 0.574635352232741, NA  
"19686", "ADAMTS8", 0.461888884682472, -0.261206259066425, 2.1654305904116  
4, -0.120625551436756, 0.903987629498604, NA  
"19687", "C11orf44", 0.772158910595405, -0.522467080377365, 1.743371628220  
81, -0.29968772688504, 0.764415361098107, NA  
"19688", "AP003486.2", 2.3296758386002, -0.177089516502592, 1.201015682712  
15, -0.147449795245543, 0.882777004084606, NA  
"19689", "LINC02551", 0.474166422250354, -0.339941032224263, 2.13983572399  
496, -0.158863144685523, 0.873776698157444, NA  
"19690", "AP002856.2", 0.106924501560529, 0.385965786494404, 3.34626872025  
989, 0.115342137395477, 0.908173940404949, NA  
"19691", "AP003025.1", 0.695361931072129, 2.36740854135501, 2.184209037732  
61, 1.08387452870014, 0.278420434574439, NA  
"19692", "AP003025.2", 0.546043141309727, 1.01275855689645, 2.346666088957  
74, 0.431573354923392, 0.666051527559776, NA  
"19693", "GLB1L3", 0, NA, NA, NA, NA, NA  
"19694", "B3GAT1", 0.670221893834266, 1.35172419364882, 2.03651352102606, 0  
.663744276525981, 0.506853995819207, NA  
"19695", "AP004608.1", 0.11921983002294, -0.0533240139618846, 3.3524751975  
3738, -0.0159058638229612, 0.987309491940711, NA  
"19696", "LINC02697", 0, NA, NA, NA, NA, NA  
"19697", "AC026369.3", 1.22925357696581, -4.25088697295687, 1.814885538817  
04, -2.34223419716465, 0.0191686823707743, NA  
"19698", "SLC6A12", 1.08411263609135, 0.767405673568692, 1.56629345218759,  
0.48995012556356, 0.624169191651184, NA  
"19699", "AC007406.4", 0.473927467651638, 1.92694250909243, 2.341114805824  
37, 0.823087575328837, 0.410458193801785, NA  
"19700", "B4GALNT3", 0.345629519770364, -0.054409187889382, 2.616988502611  
54, -0.0207907630603215, 0.98341256615796, NA  
"19701", "AC004765.1", 0.460345762089301, 1.79881068137137, 2.804079573270  
4, 0.641497730135174, 0.521199355177037, NA  
"19702", "LINC00942", 0.203509424658842, -0.774663427007579, 3.35247519753  
738, -0.231072082972194, 0.817258802814834, NA  
"19703", "AC005343.1", 0.646410959150491, -0.455197068343285, 2.0126550241  
9321, -0.22616745685255, 0.821071180518217, NA  
"19704", "AC005342.1", 0.279606582363734, 1.19594067730093, 3.169854792595  
59, 0.377285634690431, 0.705961346602518, NA  
"19705", "CACNA1C-IT3", 0, NA, NA, NA, NA, NA  
"19706", "AC005293.1", 0.102686272020481, -0.0533240139618846, 3.352475197  
53738, -0.0159058638229612, 0.987309491940711, NA  
"19707", "AC005414.1", 0, NA, NA, NA, NA, NA  
"19708", "CACNA1C-  
AS2", 1.44639764461112, -1.30312857063993, 1.27023259049932, -1.0258976036  
2524, 0.304939852339276, NA

"19709", "CACNA1C-  
AS1", 0.102686272020481, -0.0533240139618846, 3.35247519753738, -0.0159058  
638229612, 0.987309491940711, NA  
"19710", "LINC02371", 1.20146552308541, -2.18309548220226, 1.4434579952317  
8, -1.51240665777164, 0.130430442250138, NA  
"19711", "NRIP2", 1.28752103203014, 0.778151387653385, 1.3795251172799, 0.5  
64071924393605, 0.572705184272909, NA  
"19712", "FOX M1", 0.759324973223215, 0.74698401819925, 1.7725345002577, 0.4  
2142142682732, 0.673447375619106, NA  
"19713", "AC005911.1", 0.487619809295311, -0.889875099459415, 2.1216590031  
4198, -0.419424185574398, 0.674906151574482, NA  
"19714", "TEAD4", 1.42817340122008, -1.35953134032561, 1.46775564745793, -0  
.926265446622701, 0.354308048152932, NA  
"19715", "AC125807.2", 0.32184520322056, -2.1004006767475, 3.0000411347961  
3, -0.70012395909706, 0.483849894373614, NA  
"19716", "AC005865.2", 0.102686272020481, -0.0533240139618846, 3.352475197  
53738, -0.0159058638229612, 0.987309491940711, NA  
"19717", "PRMT8", 0.312297045601491, 1.32499568071923, 3.05012201583773, 0.  
434407434797427, 0.663992599764673, NA  
"19718", "AC006207.1", 0, NA, NA, NA, NA, NA  
"19719", "AC005842.1", 0.221450767245824, -0.774663427007578, 3.3524751975  
3738, -0.231072082972194, 0.817258802814834, NA  
"19720", "AKAP3", 2.03960343023925, 1.0914602623467, 1.18955650533695, 0.91  
7535449093727, 0.358862125899411, NA  
"19721", "AC005833.2", 0.142120095111522, -0.0533240139618842, 3.352475197  
53738, -0.0159058638229611, 0.987309491940711, NA  
"19722", "AC006063.2", 1.23767117074576, -1.87834374051381, 1.448843178577  
28, -1.29644378928456, 0.194822633993396, NA  
"19723", "KCNA5", 0.11921983002294, -0.0533240139618846, 3.35247519753738,  
-0.0159058638229612, 0.987309491940711, NA  
"19724", "AN02", 0.661023254723423, 0.587637142820253, 1.91437625463456, 0.  
30696010849363, 0.758873736099136, NA  
"19725", "PLEKHG6", 1.250136789886, 0.505420158755625, 1.37645049386574, 0.  
367190945848084, 0.713476592516154, NA  
"19726", "AC005840.2", 1.79366655991721, 0.297056506478692, 1.054060046255  
73, 0.281821237351616, 0.778080585652856, NA  
"19727", "CD27", 2.10645929246917, 0.269428359425954, 0.974296060589994, 0.  
27653643520102, 0.782136079006288, NA  
"19728", "AC005840.4", 1.55966959643942, -0.757370388295611, 1.14611789580  
849, -0.660813683361389, 0.508731806507256, NA  
"19729", "AC006064.5", 0.183715948661733, 0.576034712544328, 3.34068880739  
852, 0.172429922616139, 0.863099549623161, NA  
"19730", "AC006064.4", 1.70332588196596, -2.35147522791163, 1.226156235026  
64, -1.91776150602907, 0.0551412588255064, NA  
"19731", "LPAR5", 0.0534622507802646, -0.0533240139618838, 3.3524751975373  
8, -0.015905863822961, 0.987309491940711, NA  
"19732", "ACRBP", 1.31409598010756, 0.883123341470515, 1.31108929049779, 0.  
673579860556416, 0.500578460628359, NA  
"19733", "AC125494.1", 0.0534622507802646, -0.0533240139618838, 3.35247519  
753738, -0.015905863822961, 0.987309491940711, NA

"19734","CDCA3",0.918776118327392,-1.02342665038938,1.45727489266923,-  
0.702287986664487,0.482499583638695,NA  
"19735","U47924.3",0.446452672408725,-0.67037943798233,2.4615288907080  
6,-0.272342705589572,0.785358522403847,NA  
"19736","AC018653.3",0.777387702149416,-0.24052502493164,1.58854280524  
807,-0.151412366186808,0.879650435119664,NA  
"19737","AC018653.4",0,NA,NA,NA,NA,NA  
"19738","AC018653.1",0.333884508879529,-1.5113465063233,2.584244266864  
41,-0.58483113446435,0.558661267333854,NA  
"19739","CD163L1",1.18805904066217,-4.22250234681818,1.75847282008559,  
-2.40123264834577,0.0163399442854046,NA  
"19740","CLEC4C",0.30528502708413,-2.35094355977522,3.02528291170748,-  
0.777098746922923,0.437100513227499,NA  
"19741","SLC2A14",1.84208406859129,-2.87169257767884,1.60169144031785,  
-1.79291248326142,0.0729869189682023,NA  
"19742","AC006511.6",0.355136568861056,1.5186996579252,2.4778064852054  
2,0.612921011787285,0.539928569196643,NA  
"19743","AC092111.2",0,NA,NA,NA,NA,NA  
"19744","FAM90A1",0.0644961186387932,-0.0533240139618838,3.35247519753  
738,-0.015905863822961,0.987309491940711,NA  
"19745","LINC02449",0.607870014760114,1.27339430955689,1.8053745171505  
,0.705335262827757,0.480601620685911,NA  
"19746","AC092745.4",0,NA,NA,NA,NA,NA  
"19747","AC092745.1",0,NA,NA,NA,NA,NA  
"19748","CLEC4D",0.644278621671,-2.45525588258801,2.12911432396343,-1.  
15318179721672,0.248835773258706,NA  
"19749","AC092746.1",0,NA,NA,NA,NA,NA  
"19750","AC006581.2",0.665947904223087,0.0829385896308807,1.7969256000  
3318,0.0461558283934234,0.963186048762229,NA  
"19751","LINC00612",0.932649064957534,0.417810767407927,1.690239039691  
03,0.247190342665557,0.804760918879718,NA  
"19752","PZP",0,NA,NA,NA,NA,NA  
"19753","LINC00987",1.22388310309409,0.471303747458708,1.6162396462671  
7,0.291605114716261,0.770588564349203,NA  
"19754","AC010175.1",0.102686272020481,-0.0533240139618846,3.352475197  
53738,-0.0159058638229612,0.987309491940711,NA  
"19755","LINC02367",0.11921983002294,-0.0533240139618846,3.35247519753  
738,-0.0159058638229612,0.987309491940711,NA  
"19756","AC010186.1",0.244351032334407,-0.774664026145693,3.3006297283  
3046,-0.234701887187309,0.814440122883676,NA  
"19757","CLECL1",0.469662834546351,0.778212425586608,2.39881828173789,  
0.324414913589373,0.745623930374656,NA  
"19758","AC091814.1",1.37119096242454,0.260298021705233,1.287329133520  
2,0.202200055081057,0.839760330070565,NA  
"19759","LINC02470",0.154285403418625,-0.774663427007578,3.35247519753  
738,-0.231072082972193,0.817258802814835,NA  
"19760","CLEC12A-AS1",0,NA,NA,NA,NA,NA  
"19761","CLEC1B",0.102686272020481,-0.0533240139618846,3.3524751975373  
8,-0.0159058638229612,0.987309491940711,NA  
"19762","CLEC12B",0.511568240720285,0.936418993832649,2.77825760509041

,0.337052616041404,0.736077236406564,NA  
"19763","CLEC9A",0.525904730882246,-2.31434044591359,1.99022065328451,  
-1.16285620998565,0.24488784672784,NA  
"19764","CLEC1A",0.361065732044111,0.3670708605405,2.57744185534835,0.  
142416737657459,0.886750842401241,NA  
"19765","TMEM52B",0,NA,NA,NA,NA,NA  
"19766","AC115676.1",0.0644961186387932,-0.0533240139618838,3.35247519  
753738,-0.015905863822961,0.987309491940711,NA  
"19767","LINC02617",0.812214320946386,0.765253237337705,1.753395340194  
94,0.436440784228744,0.662516953809415,NA  
"19768","KLRC4",0.480121447191881,0.774306247838734,1.94835900054818,0.  
.39741456662806,0.691061775492636,NA  
"19769","KLRC2",2.29809466503,0.0600604701550249,1.04275641388174,0.05  
75977949936028,0.954069006099173,NA  
"19770","EIF2S3B",0.541082060075576,-0.48599471264493,1.89998431741555  
, -0.255788802144432,0.798113920934247,NA  
"19771","LINC02446",0.0644961186387932,-0.0533240139618838,3.352475197  
53738,-0.015905863822961,0.987309491940711,NA  
"19772","STYK1",0.273505233441565,-0.226106766776126,2.74490218220006,  
-0.082373342205914,0.934349833830783,NA  
"19773","TAS2R10",0.700021214403946,-1.22210674580718,1.78717518686059  
, -0.683820341056752,0.494088620352789,NA  
"19774","TAS2R13",0.100823152638361,-1.35173207482145,3.35247519753738  
, -0.40320419844251,0.686798011343181,NA  
"19775","PRH2",0,NA,NA,NA,NA,NA  
"19776","TAS2R50",0.102686272020481,-0.0533240139618846,3.352475197537  
38,-0.0159058638229612,0.987309491940711,NA  
"19777","TAS2R20",1.15625471331467,0.821601032899237,1.51049625226501,  
0.543927885731087,0.586491098713775,NA  
"19778","TAS2R19",0.640617133976082,-0.989776845726231,1.9196574372165  
9,-0.515600766333268,0.606133274973972,NA  
"19779","TAS2R31",1.13102150365197,2.31051391357536,1.45730302915298,1.  
.58547252517433,0.112859014519969,NA  
"19780","TAS2R46",0.403460020245984,1.56382911394003,2.91211969440415,  
0.537007155627923,0.591262671305975,NA  
"19781","TAS2R43",0.261339925134462,0.693947743382389,3.27302645474789  
, 0.212020206062111,0.832091270506721,NA  
"19782","AC134349.1",0.11921983002294,-0.0533240139618846,3.3524751975  
3738,-0.0159058638229612,0.987309491940711,NA  
"19783","BCL2L14",0.658476882943431,0.109408780188108,1.83805974826829  
, 0.0595240607881144,0.952534701713509,NA  
"19784","AC007619.1",0.102230937222884,-1.35173207482145,3.35247519753  
738,-0.403204198442509,0.686798011343181,NA  
"19785","AC008115.4",1.565980197358,1.98545102267368,1.55502855223919,  
1.27679393398578,0.201675007693359,NA  
"19786","GPR19",1.09731291544091,0.537818747212028,1.49594253174668,0.  
359518320923777,0.719207374612861,NA  
"19787","AC008115.3",2.20664243882521,-0.790906069793098,1.00495567997  
55,-0.787005920313203,0.431278400471739,NA  
"19788","GSG1",0.727442316284292,-1.52935262911891,1.9673219843629,-0.



777377898114719,0.436935848330384,NA  
"19789","AC022276.1",0,NA,NA,NA,NA,NA  
"19790","GRIN2B",0.360610397246515,-0.842358819579034,2.55777332949921  
, -0.329332865373164,0.741904105400661,NA  
"19791","AC007527.1",0.11921983002294,-0.0533240139618846,3.3524751975  
3738,-0.0159058638229612,0.987309491940711,NA  
"19792","AC007535.1",0.298268617912268,1.11711823327978,2.679020476598  
25,0.416987568045118,0.676687501005877,NA  
"19793","AC008114.1",0,NA,NA,NA,NA,NA  
"19794","SMC03",0,NA,NA,NA,NA,NA  
"19795","AC007655.2",0.155693188003149,-0.774663427007578,3.3524751975  
3738,-0.231072082972193,0.817258802814835,NA  
"19796","ART4",0.411988757791277,1.6368646095705,2.46461796645583,0.66  
4145369322427,0.506597274767685,NA  
"19797","ERP27",0.698465425346231,-0.237713606590316,1.78552725902405,  
-0.133133563427224,0.89408775162841,NA  
"19798","PTPR0",1.87469590671946,1.51660775714247,1.4396015633504,1.05  
349132409446,0.292115868516658,NA  
"19799","AC073651.1",0.205372544040962,0.695830627438559,3.33747149429  
751,0.208490358233014,0.834846110249776,NA  
"19800","AC007552.2",0,NA,NA,NA,NA,NA  
"19801","AC007529.2",1.80690982971495,-0.985806932714111,1.25382086396  
247,-0.786242246439138,0.431725580269311,NA  
"19802","RERGL",1.40284388745595,1.91077232155131,1.52782749132364,1.2  
5064664198175,0.211063425658812,NA  
"19803","AC137561.1",0,NA,NA,NA,NA,NA  
"19804","SLC01C1",0.203509424658842,-0.774663427007579,3.3524751975373  
8,-0.231072082972194,0.817258802814834,NA  
"19805","SPX",0.464995673773945,0.734903123880279,1.95483186455428,0.3  
75941858328489,0.706960120811065,NA  
"19806","AC008250.2",0.269413327882159,-0.15046778595343,2.76844275514  
859,-0.0543510555432646,0.956655473192921,NA  
"19807","AC007671.1",0.766809169088484,0.529935024720206,1.60808676062  
945,0.329543801798837,0.7417446920329,NA  
"19808","AC053513.2",0.918135050057743,2.76504439955895,1.849514607230  
95,1.49501084703446,0.134911611284537,NA  
"19809","AC087241.2",1.1184975238138,-0.0780155916355881,1.47579856799  
303,-0.0528633062313396,0.957840820881367,NA  
"19810","SOX5-  
AS1",0.205372544040962,0.695830627438559,3.33747149429751,0.2084903582  
33014,0.834846110249776,NA  
"19811","AC023510.2",0.165319271277154,-0.774663427007578,3.3524751975  
3738,-0.231072082972193,0.817258802814835,NA  
"19812","AC092794.2",0.310685332713897,-0.774666839538346,3.0453962482  
8073,-0.254373085267864,0.799207342088715,NA  
"19813","AC022509.3",0.661134634038773,-1.03833577578941,2.28707494151  
712,-0.45400164067236,0.649827645918499,NA  
"19814","AC022509.4",0.78342364904722,-1.7185147261542,1.9199250385626  
2,-0.895094699864318,0.370736466985625,NA  
"19815","AC055720.1",0,NA,NA,NA,NA,NA

"19816", "AC024896.1", 0.237178199441998, 0.945890913069552, 2.83590635755  
811, 0.333540954393156, 0.738725980375699, NA  
"19817", "SMC02", 0.11921983002294, -0.0533240139618846, 3.35247519753738,  
-0.0159058638229612, 0.987309491940711, NA  
"19818", "AC087257.1", 0.458482642707181, 0.70064685135015, 2.851567401268  
14, 0.24570587075675, 0.805909927290014, NA  
"19819", "AC009509.4", 0.918932756616672, -0.51398474827673, 1.52889702609  
075, -0.336180095523466, 0.736735061778429, NA  
"19820", "MANSC4", 0.102686272020481, -0.0533240139618846, 3.3524751975373  
8, -0.0159058638229612, 0.987309491940711, NA  
"19821", "AC022079.2", 0.3214677940779, 0.229487394597908, 2.3251947287346  
8, 0.0986959895280639, 0.921379653212521, NA  
"19822", "AC022079.1", 1.43313773558201, -0.665884084394692, 1.36527126504  
107, -0.487730241927168, 0.625740927912044, NA  
"19823", "AC022081.1", 6.4224234855533, 0.315771840799654, 1.6967379746092  
5, 0.186105247554428, NA, NA  
"19824", "AC012150.1", 0, NA, NA, NA, NA, NA  
"19825", "AC012150.2", 0, NA, NA, NA, NA, NA  
"19826", "AC009318.4", 1.33459049939707, 0.196962407615867, 1.341688056672  
2, 0.146801938525408, 0.88328835454157, NA  
"19827", "OVCH1-  
AS1", 2.32147254969936, 0.508106576973445, 1.49171079871705, 0.34062002997  
5276, 0.733389648516774, NA  
"19828", "OVCH1", 0, NA, NA, NA, NA, NA  
"19829", "AC012673.1", 2.21743756665376, -0.389694536041683, 0.95356842873  
3849, -0.40866971294249, 0.682782063224914, NA  
"19830", "AC010198.1", 0.326538767558205, -0.331793312433368, 3.0440988851  
9301, -0.108995576341906, 0.913205998999919, NA  
"19831", "DDX11-  
AS1", 1.85625645633154, 0.474216784613541, 1.18382735470177, 0.40057934354  
2038, 0.688729856386698, NA  
"19832", "AC024940.6", 0, NA, NA, NA, NA, NA  
"19833", "AC024940.1", 1.01084976256708, 0.268670671276026, 1.536297292749  
44, 0.174881953215708, 0.86117239098599, NA  
"19834", "LINC02387", 0.284110384636469, -0.774665791363346, 3.14291126894  
145, -0.246480325110883, 0.805310433006106, NA  
"19835", "AC068792.1", 1.90597946502235, 1.7193330623341, 1.17977821659196  
, 1.45733582647487, 0.14502370194555, NA  
"19836", "DENND5B-  
AS1", 0.271251509622856, -0.774665352300728, 3.18287089738686, -0.24338572  
8568736, 0.8077065984266, NA  
"19837", "AC068774.1", 0.579110257314644, 1.11861207684319, 2.713233122492  
68, 0.412280119820853, 0.680134118292527, NA  
"19838", "H3F3C", 1.66754842024815, 0.943973557623144, 1.25855919533855, 0.  
750043034224718, 0.453228786740155, NA  
"19839", "AC048344.4", 1.64185497950732, -0.814230844458954, 1.11686422477  
633, -0.729032971417828, 0.465981494078889, NA  
"19840", "AC084824.3", 0.464420633129679, -0.0665423382788266, 2.420756326  
14887, -0.0274882430586012, 0.978070316985615, NA  
"19841", "PKP2", 1.03091556519296, -0.967404515146568, 1.44336228170344, -0

.670243727032169,0.502702433163575,NA  
"19842","AC087588.2",1.60778697447538,-0.320327771712361,1.24970278096  
418,-0.256323164668977,0.79770131177615,NA  
"19843","AC046130.2",1.22169848714941,-0.510045710685695,1.40825842146  
45,-0.362181899935156,0.717216104464645,NA  
"19844","C12orf40",0.11921983002294,-0.0533240139618846,3.352475197537  
38,-0.0159058638229612,0.987309491940711,NA  
"19845","LINC02555",0,NA,NA,NA,NA,NA  
"19846","AC015540.1",0.475241206720717,1.88167515318861,2.768936268645  
74,0.679566075426115,0.496779256323436,NA  
"19847","AC090630.1",1.5035038067605,-2.3797489736643,1.50227527182371  
, -1.58409648238127,0.113171764761778,NA  
"19848","AC079684.1",0.166727055861678,-0.774663427007578,3.3524751975  
3738,-0.231072082972193,0.817258802814835,NA  
"19849","AC079600.3",0.286402220682214,1.17253773374183,2.717676205167  
14,0.431448651429658,0.666142181249859,NA  
"19850","LINC02450",0.182454488057851,0.814003878402388,3.334510527486  
57,0.244114952312343,0.80714179253596,NA  
"19851","LINC02461",0.205372544040962,0.695830627438559,3.337471494297  
51,0.208490358233014,0.834846110249776,NA  
"19852","AC008127.1",0,NA,NA,NA,NA,NA  
"19853","AC009248.3",0,NA,NA,NA,NA,NA  
"19854","AC009248.2",0.894019208940227,-1.61430690541131,1.83235287750  
49,-0.881002194080377,0.378316632443042,NA  
"19855","AC079950.1",0.696236639168945,0.558083717215282,1.99662927380  
426,0.279512939401085,0.779851209376202,NA  
"19856","AC009464.1",0.203509424658842,-0.774663427007579,3.3524751975  
3738,-0.231072082972194,0.817258802814834,NA  
"19857","AC025031.3",0.102230937222884,-1.35173207482145,3.35247519753  
738,-0.403204198442509,0.686798011343181,NA  
"19858","AC025031.1",0.342841240398645,1.50148732313724,2.932711564880  
77,0.511979200790679,0.608665566347773,NA  
"19859","AC079906.1",0.596234488123347,0.228749069062241,2.04994644355  
68,0.111587826980175,0.911150224398914,NA  
"19860","AC008083.3",0.37379860440959,1.51493741483916,2.5110104748309  
8,0.603317839580552,0.546297267431531,NA  
"19861","AC008083.4",0.229815389915947,-0.207595008908767,3.3424514271  
8562,-0.0621086090347659,0.950476341218052,NA  
"19862","LINC02156",0.852342433433739,-0.00114796871299599,1.453952890  
76515,-0.000789550143121811,0.999370030196276,NA  
"19863","AC004241.3",2.0376353099736,-0.758430188458193,1.067354484263  
54,-0.710570105471097,0.477350673610827,NA  
"19864","ENDOU",1.39227273172823,-0.472557562993751,1.20631233948032,-  
0.391737320035481,0.695252312066505,NA  
"19865","AC004241.2",0.205372544040962,0.695830627438559,3.33747149429  
751,0.208490358233014,0.834846110249776,NA  
"19866","AC004466.1",1.73134257147749,0.956507514640509,1.146050675408  
26,0.83461188511561,0.403936268158873,NA  
"19867","AC004466.3",0,NA,NA,NA,NA,NA  
"19868","AC121338.1",0,NA,NA,NA,NA,NA

"19869", "COL2A1", 0.291901910826145, 1.18808087585529, 3.15650789412603, 0.376390909101225, 0.70662630344776, NA  
"19870", "AC004801.6", 1.5177534092396, 0.223250864861752, 1.18521343261553, 0.188363427816611, 0.850591766872063, NA  
"19871", "AC074029.3", 0, NA, NA, NA, NA, NA  
"19872", "CCDC184", 0.310433926219371, 0.171794429070976, 2.65395493672705, 0.0647314793079491, 0.948387798511658, NA  
"19873", "AC024257.3", 1.05403146724641, 0.131315533123994, 1.48710676047311, 0.0883026939385426, 0.929636097868507, NA  
"19874", "AC024257.5", 0.386471127445929, -0.0386990368869363, 2.94818440181732, -0.0131263963214382, 0.989526951792023, NA  
"19875", "AC024257.4", 0.102230937222884, -1.35173207482145, 3.35247519753738, -0.403204198442509, 0.686798011343181, NA  
"19876", "C12orf54", 0.736828520842533, 0.259644559488463, 1.94274094364967, 0.133648575399194, 0.893680471104997, NA  
"19877", "CCDC65", 2.14392181811019, 0.360315628327416, 0.984993417415358, 0.36580511296501, 0.714510504338048, NA  
"19878", "WNT1", 0.521717300742092, 0.996641855102642, 2.05662164923897, 0.484601460590205, 0.627959077430257, NA  
"19879", "DDN", 1.09979310811273, -0.448971134558905, 1.41775080637153, -0.316678454733496, 0.751487598643126, NA  
"19880", "DHH", 1.3285370382856, 3.36221061084197, 1.7877704050528, 1.88067248531428, 0.0600164847459361, NA  
"19881", "AC010173.1", 0.745338711117796, 1.69453941965607, 1.8750689708393, 0.903721114267903, 0.366143300274, NA  
"19882", "TROAP", 0.34124731840558, -0.225829716428168, 2.57314323568546, -0.0877641451498945, 0.930064135787483, NA  
"19883", "KCNH3", 0.50415336729777, -0.889907027585253, 2.10760987318723, -0.422235176873362, 0.672853367898664, NA  
"19884", "FAM186B", 0.705152129221304, 2.39785149022218, 2.18272226160977, 1.09856005612631, 0.271960008626882, NA  
"19885", "LINC02395", 0.100823152638361, -1.35173207482145, 3.35247519753738, -0.40320419844251, 0.686798011343181, NA  
"19886", "AC008147.1", 0.102686272020481, -0.0533240139618846, 3.35247519753738, -0.0159058638229612, 0.987309491940711, NA  
"19887", "AC008121.2", 0.231678509298067, 0.99788326475647, 3.33029638254771, 0.299637975162162, 0.764453314336329, NA  
"19888", "HIGD1C", 0, NA, NA, NA, NA, NA  
"19889", "AC008121.3", 0.167182390659274, 0.576034712544328, 3.34068880739852, 0.172429922616139, 0.863099549623161, NA  
"19890", "CELA1", 0.0534622507802646, -0.0533240139618838, 3.35247519753738, -0.015905863822961, 0.987309491940711, NA  
"19891", "GALNT6", 0.753145484077378, -1.81920585498803, 1.86799564945974, -0.973881205512542, 0.33011552660278, NA  
"19892", "SLC4A8", 0.405166715907558, 0.502244490776096, 2.51729893510197, 0.199517222119569, 0.841858172862038, NA  
"19893", "SCN8A", 0.324592374063902, 1.32629053141379, 3.07347552214963, 0.431527930466861, 0.666084548480396, NA  
"19894", "AC068987.1", 0.85658087754252, -0.504772948687375, 1.58907972236018, -0.317651116922983, 0.750749595046087, NA

"19895", "AC068987.3", 0.459084301485419, 1.8176399812416, 2.0969858811964  
5, 0.866786942888012, 0.386058757577972, NA  
"19896", "ANKRD33", 0, NA, NA, NA, NA, NA  
"19897", "SMIM41", 0.37518145135269, -0.153942501950355, 2.52238095681358,  
-0.0610306312115614, 0.951334814337818, NA  
"19898", "KRT86", 1.08541008647637, -0.973144682567181, 1.47323306084152, -  
0.660550396562044, 0.508900688836643, NA  
"19899", "KRT81", 0.269413327882159, -0.15046778595343, 2.76844275514859, -  
0.0543510555432646, 0.956655473192921, NA  
"19900", "AC121757.2", 0.361521066841708, 1.49138941530967, 2.965156963716  
08, 0.502971489725318, 0.614984317080534, NA  
"19901", "AC121757.1", 0.11921983002294, -0.0533240139618846, 3.3524751975  
3738, -0.0159058638229612, 0.987309491940711, NA  
"19902", "KRT6A", 0, NA, NA, NA, NA, NA  
"19903", "KRT5", 0.100823152638361, -1.35173207482145, 3.35247519753738, -0  
.40320419844251, 0.686798011343181, NA  
"19904", "KRT72", 0, NA, NA, NA, NA, NA  
"19905", "KRT73-AS1", 0, NA, NA, NA, NA, NA  
"19906", "KRT73", 0.0644961186387932, -0.0533240139618838, 3.3524751975373  
8, -0.015905863822961, 0.987309491940711, NA  
"19907", "KRT2", 0.221906102043421, 0.695830468846429, 3.33747149841039, 0.  
208490310457437, 0.834846147549618, NA  
"19908", "KRT1", 0.102230937222884, -1.35173207482145, 3.35247519753738, -0  
.403204198442509, 0.686798011343181, NA  
"19909", "KRT8", 2.15987191622102, -0.794142651060466, 0.978007389382304, -  
0.812000665518525, 0.416791249614627, NA  
"19910", "KRT18", 0, NA, NA, NA, NA, NA  
"19911", "AC068888.2", 1.47794678763206, 0.971967680002856, 1.432000344822  
42, 0.6787482164492, 0.497297409724662, NA  
"19912", "SOAT2", 0.655352302957428, -0.637388480358596, 1.77607667916696,  
-0.358874415634775, 0.719689039812113, NA  
"19913", "ESPL1", 0.601690525614277, -1.63035181108362, 1.94188442685458, -  
0.839572009815451, 0.40114839845322, NA  
"19914", "AMHR2", 0.166727055861678, -0.774663427007578, 3.35247519753738,  
-0.231072082972193, 0.817258802814835, NA  
"19915", "HOXC12", 2.12698412324358, 1.77850127346116, 1.27293642194031, 1.  
39716425958669, 0.162364181640297, NA  
"19916", "AC012531.1", 2.13056418390135, 0.729370219136636, 1.140092412107  
99, 0.639746577900693, 0.522337368668314, NA  
"19917", "AC023794.6", 0.578304131508359, 2.13874616749371, 2.009179395432  
54, 1.06448740831989, 0.287107955572457, NA  
"19918", "SCAT2", 0, NA, NA, NA, NA, NA  
"19919", "AC078778.1", 0, NA, NA, NA, NA, NA  
"19920", "NFE2", 0.378054624844167, 1.53829719565843, 2.5067350252553, 0.61  
3665656784673, 0.539436287125648, NA  
"19921", "GPR84", 0.25837946002363, -0.226169694096546, 2.79045497896305, -  
0.0810511890718952, 0.93540124338622, NA  
"19922", "GTSF1", 0.271112332389108, 0.99816176680834, 3.20367428255025, 0.  
31156780583005, 0.755369004332501, NA  
"19923", "TESPA1", 1.79223767691636, -0.0629513903927999, 1.14124657072222

, -0.0551602011412504, 0.956010835524612, NA  
"19924", "AC122685.1", 0.168565237602375, -1.35173207482145, 3.35247519753  
738, -0.40320419844251, 0.686798011343181, NA  
"19925", "METTL7B", 0, NA, NA, NA, NA, NA  
"19926", "AC073487.1", 0.102686272020481, -0.0533240139618846, 3.352475197  
53738, -0.0159058638229612, 0.987309491940711, NA  
"19927", "PMEL", 1.42636137479019, -0.147525208452273, 1.368563924564, -0.1  
07795628544916, 0.914157810600895, NA  
"19928", "AC034102.8", 0.167182390659274, 0.576034712544328, 3.34068880739  
852, 0.172429922616139, 0.863099549623161, NA  
"19929", "AC034102.4", 0.203054089861245, -1.95461545718866, 3.33573296423  
696, -0.585962808817275, 0.557900507779092, NA  
"19930", "AC034102.6", 0.371644265105043, -0.769794427818552, 2.5480567934  
0679, -0.302110388516626, 0.762567913357264, NA  
"19931", "AC073896.3", 0.428522315793736, 1.66405784528808, 2.175009556805  
63, 0.765080705085282, 0.444223488631033, NA  
"19932", "IL23A", 1.29077025032408, -2.28568008718432, 1.74040895053316, -1  
.31330058173058, 0.189081682599894, NA  
"19933", "GLS2", 0.899343208922634, 1.68903150857357, 1.62995151684804, 1.0  
3624647182131, 0.300087171434161, NA  
"19934", "HSD17B6", 2.30541913975639, -0.869152714928293, 0.98586892284594  
7, -0.881610825523616, 0.377987298927351, NA  
"19935", "SDR9C7", 0, NA, NA, NA, NA, NA  
"19936", "RDH16", 0.687023162156585, 0.252423541060024, 1.66163595517566, 0  
.151912661900325, 0.879255821452407, NA  
"19937", "AC026120.3", 0.308058816061443, 1.2759273050851, 3.3195988693173  
6, 0.384361892901681, 0.700710240394097, NA  
"19938", "LRP1-AS", 0, NA, NA, NA, NA, NA  
"19939", "NXPH4", 0.813595030302314, -0.890004803554134, 1.77955094154048,  
-0.500128871154257, 0.616984338245605, NA  
"19940", "AC137834.2", 0.11921983002294, -0.0533240139618846, 3.3524751975  
3738, -0.0159058638229612, 0.987309491940711, NA  
"19941", "STAC3", 1.2998486206361, -2.02430159651765, 1.34539817807767, -1.  
50461151910434, 0.132423983009219, NA  
"19942", "AC126614.1", 0.524521883939145, -0.82453542192193, 1.87493953482  
442, -0.439766406653293, 0.660106300612718, NA  
"19943", "KIF5A", 0.102230937222884, -1.35173207482145, 3.35247519753738, -  
0.403204198442509, 0.686798011343181, NA  
"19944", "AC025165.2", 0.507852987928039, 0.886709141902599, 2.12106615946  
523, 0.418048790201885, 0.675911445229262, NA  
"19945", "AGAP2", 1.22782279586348, -0.3852312192408, 1.26429504235184, -0.  
304700411166837, 0.760594336428621, NA  
"19946", "CYP27B1", 0.721590154639123, 1.55343576850866, 1.93816734906066,  
0.801497233591073, 0.422843844958748, NA  
"19947", "AC025165.4", 0.994184718485495, 0.0183306283221301, 1.4450554603  
8865, 0.0126850690680066, 0.989879050667289, NA  
"19948", "AC083805.3", 1.80555420143776, -0.761358894566695, 1.34328870596  
411, -0.566787237312657, 0.570858742658343, NA  
"19949", "AC068305.2", 0.824723666366089, -2.12195227544702, 1.65553100410  
047, -1.28173514732814, 0.199935570986183, NA

"19950", "AC046129.1", 1.13852208497292, -2.37898072491118, 1.629928515697  
74, -1.45956138689481, 0.144410657923295, NA  
"19951", "AC090629.1", 0.437051053339029, 1.77369672798529, 2.780081346213  
16, 0.638001737035971, 0.52347254935574, NA  
"19952", "AC078789.1", 0.37379860440959, 1.51493741483916, 2.5110104748309  
8, 0.603317839580552, 0.546297267431531, NA  
"19953", "PPM1H", 0.791287052344797, 2.56390726143683, 1.67212963810939, 1.  
53331847184752, 0.125197405487973, NA  
"19954", "AVPR1A", 1.17630656427113, -0.0638439253415628, 1.54919012230183  
, -0.0412111621565865, 0.967127555119408, NA  
"19955", "DPY19L2", 0.99122040144514, 0.956082178665736, 1.50567202553961,  
0.634987010748964, 0.525436886624046, NA  
"19956", "AC025576.1", 0.571062708321527, -0.127361090814091, 1.8568318282  
558, -0.0685905362435145, 0.945315552109711, NA  
"19957", "AC078962.1", 0, NA, NA, NA, NA, NA  
"19958", "AC078962.3", 0, NA, NA, NA, NA, NA  
"19959", "TBC1D30", 1.16573682476394, 0.661375454869311, 1.34283160687793,  
0.492523002498433, 0.622349664864622, NA  
"19960", "GRIP1", 0.681796529335125, 1.39562132797263, 2.29045037218428, 0.  
609321793181531, 0.542311164585007, NA  
"19961", "AC078983.1", 0.0644961186387932, -0.0533240139618838, 3.35247519  
753738, -0.015905863822961, 0.987309491940711, NA  
"19962", "LINC02420", 0.391034886196998, 0.0665540305054527, 2.49687024386  
216, 0.0266549816391367, 0.978734919809008, NA  
"19963", "AC078777.1", 0.320866135299661, -1.37464340165215, 3.04127275254  
598, -0.451996092919114, 0.651271797119151, NA  
"19964", "IFNG-  
AS1", 0.819241044426886, -0.735224372441454, 1.61578124577838, -0.45502717  
2992882, 0.649089690043059, NA  
"19965", "IL26", 0.76735619724562, 1.59408878066927, 1.75027539839216, 0.91  
0764547187055, 0.362419446150742, NA  
"19966", "IL22", 0.0644961186387932, -0.0533240139618838, 3.35247519753738  
, -0.015905863822961, 0.987309491940711, NA  
"19967", "AC090061.1", 2.04055563750029, -0.0374533089768372, 1.0579451379  
2099, -0.0354019387531174, 0.971759238781057, NA  
"19968", "AC025423.1", 0.844983463132789, -0.476106463988479, 1.7370787841  
0172, -0.274084554106557, 0.784019643530607, NA  
"19969", "AC025423.4", 0.337572635416734, -0.264596406747081, 2.5942306538  
205, -0.101994171704591, 0.918761301265062, NA  
"19970", "AC020656.2", 0, NA, NA, NA, NA, NA  
"19971", "AC020656.1", 2.29393714287749, -0.410997650586412, 1.15185768409  
823, -0.356812873899586, 0.721231897863471, NA  
"19972", "AC025263.1", 1.29499825943058, 0.601892434217682, 1.441751580455  
19, 0.417473053178588, 0.676332430371631, NA  
"19973", "MYRFL", 0.724818330069816, 1.42114426338271, 1.77035367518118, 0.  
802745961615422, 0.422121581605769, NA  
"19974", "AC092881.2", 0.102686272020481, -0.0533240139618846, 3.352475197  
53738, -0.0159058638229612, 0.987309491940711, NA  
"19975", "AC025569.1", 0.425415526702263, 0.584089887951628, 2.49754559908  
893, 0.233865555113267, 0.815089354763517, NA

"19976", "PTPRB", 0.865678610225245, -3.12287621965679, 1.92526211995868, -1.62205249211667, 0.10479210916551, NA  
"19977", "AC090116.1", 0.102686272020481, -0.0533240139618846, 3.35247519753738, -0.0159058638229612, 0.987309491940711, NA  
"19978", "AC089984.1", 0.203054089861245, -1.95461545718866, 3.33573296423696, -0.585962808817275, 0.557900507779092, NA  
"19979", "AC025257.1", 0.551002063811326, 1.02625300417234, 2.37214883740366, 0.432625890918202, 0.665286576902032, NA  
"19980", "GLIPR1L1", 0, NA, NA, NA, NA, NA  
"19981", "AC121761.1", 0.523957614698141, 0.975101415462914, 2.08106990456499, 0.468557742017196, 0.639385788682183, NA  
"19982", "AC011611.3", 0.528223185061963, -0.371909814349007, 2.09774724756444, -0.177290097642034, 0.859280528526044, NA  
"19983", "AC107032.2", 0.891499912388831, -0.486908162921179, 1.64854566144417, -0.295356188371897, 0.767721797755258, NA  
"19984", "E2F7", 0, NA, NA, NA, NA, NA  
"19985", "AC073591.1", 0.403905255303675, 0.582053125255944, 2.18821086026177, 0.265994989708769, 0.790243067703406, NA  
"19986", "SYT1", 0.154285403418625, -0.774663427007578, 3.35247519753738, -0.231072082972193, 0.817258802814835, NA  
"19987", "AC073569.3", 1.02131606636723, -0.811077249223093, 1.45590043103551, -0.55709664749959, 0.577461397976667, NA  
"19988", "AC073569.1", 0, NA, NA, NA, NA, NA  
"19989", "OT0GL", 0.218781522057418, -0.267643672651118, 2.94083342748661, -0.0910094635587233, 0.927485071432953, NA  
"19990", "PTPRQ", 1.44723185700202, 3.46462159919912, 1.65704114880562, 2.09084825786999, 0.0365416685990302, NA  
"19991", "MYF6", 0.374235755461852, 1.61166138086313, 3.30313274601666, 0.487919046791771, 0.625607182748636, NA  
"19992", "MYF5", 0, NA, NA, NA, NA, NA  
"19993", "TSPAN19", 0.203054089861245, -1.95461545718866, 3.33573296423696, -0.585962808817275, 0.557900507779092, NA  
"19994", "LRR1Q1", 1.8567180542449, 0.448598299496767, 1.13273010604763, 0.396032821147515, 0.692080815766701, NA  
"19995", "C12orf50", 0.204917209243366, -0.774663427007578, 3.35247519753738, -0.231072082972194, 0.817258802814834, NA  
"19996", "AC010201.3", 0.64687512118753, 1.00410513743007, 1.81004819701709, 0.554739447869294, 0.579072889829564, NA  
"19997", "AC010201.2", 0.531329974153436, 0.732454996938886, 1.90378045321394, 0.384737113831779, 0.700432194974134, NA  
"19998", "AC010201.1", 0.709346706108352, 0.530600880372637, 1.80015908123236, 0.294752217125942, 0.768183170712118, NA  
"19999", "AC009522.1", 1.94359732276649, 2.04093012050521, 1.31871578044663, 1.54766489547427, 0.121702998120225, NA  
"20000", "AC126178.1", 0.49440128137563, 0.471668930345083, 2.14383053342663, 0.220012227175057, 0.825861632100525, NA  
"20001", "LINC02822", 0, NA, NA, NA, NA, NA  
"20002", "EPYC", 1.45260174155938, 2.52869754552598, 1.45002755548456, 1.74389620111803, 0.0811771911848423, NA  
"20003", "KERA", 1.09578374451717, 1.38074521469058, 1.50460985677893, 0.91



7676571417974,0.358788216847114,NA  
"20004","LINC01619",1.25708555710766,-0.423911156926806,1.394412494234  
32,-0.304006998416619,0.761122559385512,NA  
"20005","AC123512.1",0,NA,NA,NA,NA,NA  
"20006","AC025164.2",0,NA,NA,NA,NA,NA  
"20007","LINC02391",0.32184520322056,-2.1004006767475,3.00004113479613  
, -0.70012395909706,0.483849894373614,NA  
"20008","CLLU10S",0.244806367132003,0.695807100884759,3.33664907448574  
, 0.208534696143316,0.834811494458112,NA  
"20009","CLLU1",0.242943247749883,-0.774663951729422,3.30711343151841,  
-0.234241724020258,0.814797324817481,NA  
"20010","LINC02397",0.93899321078531,1.97648199642314,1.94470213496382  
, 1.01634176303299,0.309466667575139,NA  
"20011","C12orf74",0,NA,NA,NA,NA,NA  
"20012","LINC02413",0,NA,NA,NA,NA,NA  
"20013","AC138123.1",1.72981650908515,0.724549901282585,1.335875052223  
6,0.542378495710773,0.587557790638982,NA  
"20014","AC138123.2",0.167182390659274,0.576034712544328,3.34068880739  
852,0.172429922616139,0.863099549623161,NA  
"20015","LINC02412",0.744942275743106,-2.67725451985957,1.803729409715  
11,-1.48428833362673,0.137732443981729,NA  
"20016","AC124947.1",2.00966065169444,0.581057707905159,1.370761753486  
51,0.423894018364059,0.671643106718253,NA  
"20017","SOCS2-  
AS1",2.28147707393889,2.59314885315978,1.24211905832571,2.087681398798  
57,0.036826583869231,NA  
"20018","AC012464.2",1.1423814394465,-0.385888707355025,1.488802552447  
91,-0.259194012477036,0.795485550642445,NA  
"20019","AC012464.3",0.719539960589927,1.50960347298787,1.942533329996  
92,0.777131310786963,0.437081302708916,NA  
"20020","AC123567.2",0,NA,NA,NA,NA,NA  
"20021","AC073655.3",0.183715948661733,0.576034712544328,3.34068880739  
852,0.172429922616139,0.863099549623161,NA  
"20022","AC073655.2",1.97924459405081,-0.746934623504036,1.34230422651  
076,-0.55645703019624,0.577898461455678,NA  
"20023","CEP83-  
DT",2.19557119909756,0.244616864289211,0.979596025531768,0.24971198117  
757,0.802810092041609,NA  
"20024","AC090001.1",1.27569720925228,-1.86107205494492,1.383276608094  
24,-1.34540846281565,0.178493363812309,NA  
"20025","AMDHD1",1.53335403215054,-2.70921453201389,1.395213743454,-1.  
94179174676631,0.0521623164200749,NA  
"20026","HAL",0.628910999691676,1.05198629488273,2.2994564246075,0.457  
493468293184,0.647316396009608,NA  
"20027","RMST",0,NA,NA,NA,NA,NA  
"20028","LINC02453",2.3066886505159,-0.803498752036683,0.9584092751954  
97,-0.838367045094367,0.401824591943849,NA  
"20029","FAM71C",0.2053725444040962,0.695830627438559,3.33747149429751,  
0.208490358233014,0.834846110249776,NA  
"20030","DEPDC4",1.77410563500594,-0.173116955450129,1.02844537701555,

-0.168328779844874,0.866324633843698,NA  
"20031","MYBPC1",0.171420620199322,0.765902268429694,3.33569101336987,  
0.22960827767316,0.818396174063793,NA  
"20032","AC079907.1",1.52039795206363,-0.178208560116202,1.31720374073  
726,-0.135293086866316,0.892380150706955,NA  
"20033","PMCH",0.558448362018292,-1.79602275615255,2.64086766675917,-0  
.680088131169632,0.496448659172799,NA  
"20034","ASCL1",0.541459469218236,-2.9452539702196,2.57595994684813,-1  
.14336171019403,0.252888443169467,NA  
"20035","C12orf42",0.487749614881886,0.747713470130141,2.4406206421279  
9,0.306362020063146,0.759329022534777,NA  
"20036","AC025265.1",0.720681165536479,-1.13273129283123,1.78917206635  
178,-0.633103609280537,0.526665985482114,NA  
"20037","AC012555.1",0.345364161606409,1.425777977878,2.96866436222982  
,0.480275909940546,0.631031216108136,NA  
"20038","AC089983.2",1.14234309194241,-1.83415951060054,1.528731572441  
96,-1.19979173823871,0.230220233610239,NA  
"20039","AC089983.1",0.312297045601491,1.32499568071923,3.050122015837  
73,0.434407434797427,0.663992599764673,NA  
"20040","AC089985.1",0.102230937222884,-1.35173207482145,3.35247519753  
738,-0.403204198442509,0.686798011343181,NA  
"20041","AC079174.1",0.673748980342008,0.254085391116009,1.66616937979  
626,0.152496735444195,0.87879516506363,NA  
"20042","RFX4",0.0644961186387932,-0.0533240139618838,3.35247519753738  
, -0.015905863822961,0.987309491940711,NA  
"20043","AC007695.1",0.220644641439539,0.945449760607245,2.90117912387  
055,0.325884655941509,0.744511625317288,NA  
"20044","BTBD11",0.389209879041914,0.231017256566099,2.21805708101799,  
0.104152980797082,0.917047946845685,NA  
"20045","AC007622.2",0.645003174565967,-0.451168164792344,2.0135758616  
5295,-0.224063157184443,0.822708159950468,NA  
"20046","LINC01498",0,NA,NA,NA,NA,NA  
"20047","AC008119.1",0.11921983002294,-0.0533240139618846,3.3524751975  
3738,-0.0159058638229612,0.987309491940711,NA  
"20048","AC007569.1",0.102686272020481,-0.0533240139618846,3.352475197  
53738,-0.0159058638229612,0.987309491940711,NA  
"20049","AC087893.2",0.672168287328569,-0.0323042290795918,1.817932477  
93473,-0.0177697628881636,0.985822526670066,NA  
"20050","SVOP",0.267550208500038,-1.3833228396413,2.75673373075219,-0.  
501797770386714,0.615809781659427,NA  
"20051","USP30-  
AS1",1.87730700227803,3.03613224263973,1.47172427337775,2.062976263666  
24,0.0391148834171697,NA  
"20052","AC007637.1",0.477728546139424,1.86543227479073,2.722284707375  
16,0.685245106706488,0.493189264578895,NA  
"20053","MYO1H",0.142120095111522,-0.0533240139618842,3.35247519753738  
, -0.0159058638229611,0.987309491940711,NA  
"20054","AC007570.1",0.606006895377993,0.339740898093513,1.82167188470  
481,0.186499501335041,0.852053069874298,NA  
"20055","FAM222A",1.86554795577047,-1.74700730604388,1.13453960151879,

-1.53983810146882,0.123599821931924,NA  
"20056","FAM222A-  
AS1",0.102686272020481,-0.0533240139618846,3.35247519753738,-0.0159058  
638229612,0.987309491940711,NA  
"20057","AC084876.1",0.546619862446542,0.804497369137676,2.07227881653  
082,0.388218690805554,0.69785420251927,NA  
"20058","AC007546.1",0.788679058735203,-1.04934935622171,1.65861722711  
044,-0.632665173778423,0.526952316924557,NA  
"20059","RAD9B",1.83520682487947,0.909961425050272,1.20708234948022,0.  
753851984864253,0.450938104752101,NA  
"20060","MYL2",0.167182390659274,0.576034712544328,3.34068880739852,0.  
172429922616139,0.863099549623161,NA  
"20061","CUX2",0.219614265997676,-1.35173207482145,3.35247519753738,-0  
.40320419844251,0.686798011343181,NA  
"20062","AC073575.2",0.790926161596203,2.66908545762359,1.979632274643  
15,1.34827335955852,0.177570477280051,NA  
"20063","RPH3A",0.0534622507802646,-0.0533240139618838,3.3524751975373  
8,-0.015905863822961,0.987309491940711,NA  
"20064","AC089999.2",0.248212067300526,0.997943832444287,3.29816976420  
681,0.302575035182971,0.762213742182461,NA  
"20065","LINC01234",0.102686272020481,-0.0533240139618846,3.3524751975  
3738,-0.0159058638229612,0.987309491940711,NA  
"20066","AC009731.1",0,NA,NA,NA,NA  
"20067","AC026765.3",0.313540715310845,1.26351236233866,2.597736835073  
7,0.486389670146404,0.62669091310095,NA  
"20068","AC078880.4",0.102686272020481,-0.0533240139618846,3.352475197  
53738,-0.0159058638229612,0.987309491940711,NA  
"20069","LINC02457",0,NA,NA,NA,NA  
"20070","RNFT2",0.913457247738664,1.91567131819646,1.69537465807137,1.  
12993980951426,0.258501587873956,NA  
"20071","AC083806.2",0.589525217307174,-1.10281743791353,2.28660416740  
859,-0.48229486048884,0.629596497767407,NA  
"20072","AC127164.1",0.909596212772544,1.02251389098115,1.678421606629  
64,0.609211587209255,0.542384200900304,NA  
"20073","AC026368.1",0.204917209243366,-0.774663427007578,3.3524751975  
3738,-0.231072082972194,0.817258802814834,NA  
"20074","TESC",1.9950106673034,0.299737954288185,1.10662778045571,0.27  
0857066469769,0.786500967031316,NA  
"20075","KSR2",0.587008559215176,-1.52070371127837,2.2665401772423,-0.  
670936137178299,0.502261214016304,NA  
"20076","AC131159.2",0.620542537796453,0.225856682852962,1.74464638888  
06,0.129456997298963,0.896996049737219,NA  
"20077","AC131238.1",0.517301546464213,0.498040097569016,2.38377887414  
378,0.208928815911209,0.83450380869556,NA  
"20078","AC026367.1",0.689732220772891,1.46869242721612,1.650909788963  
4,0.889626094069201,0.373666690064851,NA  
"20079","AC026367.3",1.53852116413365,0.828019665068346,1.242310435203  
89,0.666515905851224,0.505081400417703,NA  
"20080","AC026367.2",0.7993533083456,0.548710712820853,1.9898185088948  
3,0.275759176210303,0.782733040991509,NA

"20081", "AC084880.3", 0.361734361109198, -0.774668275573776, 2.9064903221  
0001, -0.266530485129591, 0.789830684487713, NA  
"20082", "BICDL1", 1.13972061350545, 1.4497818545222, 1.62460273433817, 0.8  
9239161296427, 0.372183064977892, NA  
"20083", "PLA2G1B", 0.495532721824205, -0.544221083607604, 2.0987004995973  
1, -0.259313362584146, 0.795393470099598, NA  
"20084", "CABP1", 0.831426674066496, -0.299413598600574, 1.65593751981326,  
-0.180812135130762, 0.85651503765316, NA  
"20085", "AC069234.2", 0.387827032098813, 1.63010944371297, 2.435116259949  
8, 0.669417501958028, 0.503229190156854, NA  
"20086", "AC069234.5", 0.464849349793304, 0.639815315539654, 2.19806742220  
542, 0.291080841777682, 0.770989491882198, NA  
"20087", "AC069234.4", 0.478027457216473, 0.876210751372392, 2.40765787792  
443, 0.36392660244891, 0.715912818937804, NA  
"20088", "HNF1A-  
AS1", 0.205372544040962, 0.695830627438559, 3.33747149429751, 0.2084903582  
33014, 0.834846110249776, NA  
"20089", "AC069209.2", 0.167182390659274, 0.576034712544328, 3.34068880739  
852, 0.172429922616139, 0.863099549623161, NA  
"20090", "AC069209.1", 0.373899669416301, -1.51022017278091, 2.51010698877  
835, -0.601655698156482, 0.547403345189504, NA  
"20091", "KDM2B-DT", 0, NA, NA, NA, NA, NA  
"20092", "AC084018.1", 0, NA, NA, NA, NA, NA  
"20093", "HPD", 1.11975876984895, 0.339428079504648, 1.47698851940424, 0.22  
9810912573349, 0.818238704650953, NA  
"20094", "AC069503.4", 0, NA, NA, NA, NA, NA  
"20095", "AC069503.1", 1.43195936675264, 2.62868127374108, 1.3884804162759  
4, 1.89320730989602, 0.058330305684204, NA  
"20096", "LRRC43", 0.569520127535124, 0.854490595173632, 2.06207441643979,  
0.41438397584551, 0.678592922402942, NA  
"20097", "B3GNT4", 0.364026197154943, 1.40568518917529, 2.5808230723278, 0.  
544665461281472, 0.585983623575459, NA  
"20098", "AC048338.2", 0.819725492951673, -2.46988527275915, 2.00712529660  
126, -1.23055858891396, 0.218488001446455, NA  
"20099", "CLIP1-  
AS1", 1.53744160929947, 0.945235051090752, 1.58497631916769, 0.59637171840  
3414, 0.550926929512115, NA  
"20100", "AC127002.2", 0.652106336632207, -0.221016966970022, 1.9638458868  
6136, -0.112542928367589, 0.91039293400979, NA  
"20101", "AC026333.4", 0.373027112048144, -2.54691231681804, 2.84480433101  
25, -0.895285587501745, 0.37063444269589, NA  
"20102", "HCAR2", 0.816412808793295, -1.06239017701011, 2.08547345918765, -  
0.509423973884539, 0.610455075595503, NA  
"20103", "HCAR3", 0.771997496259554, -0.0614433281349724, 1.77870496520555  
, -0.0345438559721296, 0.972443471191398, NA  
"20104", "HCAR1", 1.06898206808242, -0.268282511051523, 1.59074018283355, -  
0.16865262721511, 0.866069882891517, NA  
"20105", "CCDC62", 0.529036457615142, -0.0193335659048119, 2.0677713140111  
5, -0.0093499536306594, 0.992539925049355, NA  
"20106", "AC027290.1", 0.374474710060568, -0.540119686521348, 2.2519625407

3756,-0.239843992406929,0.810451201138416,NA  
"20107","AC068768.1",0.275368352823686,1.11865680170283,2.739778946225  
96,0.408301846119294,0.683052084109357,NA  
"20108","AC145423.2",0.203509424658842,-0.774663427007579,3.3524751975  
3738,-0.231072082972194,0.817258802814834,NA  
"20109","AC145423.3",0.0644961186387932,-0.0533240139618838,3.35247519  
753738,-0.015905863822961,0.987309491940711,NA  
"20110","DNAH10",0.489911645341056,0.845627865197899,2.1316184669423,0  
.396706952164338,0.691583572902617,NA  
"20111","AC068790.4",0.37379860440959,1.51493741483916,2.5110104748309  
8,0.603317839580552,0.546297267431531,NA  
"20112","AC068790.3",0.464995673773945,0.734903123880279,1.95483186455  
428,0.375941858328489,0.706960120811065,NA  
"20113","AC068790.2",1.27082335915251,0.758736557899169,1.276317466294  
05,0.594473223109809,0.552195646587148,NA  
"20114","AC068790.5",1.65740872619076,-0.497235818423698,1.08866399571  
988,-0.456739471846775,0.647858316096833,NA  
"20115","AC068790.6",0.804406490931377,0.130060669854485,1.64273022317  
571,0.0791734808427966,0.936894637584093,NA  
"20116","RFLNA",0.672168287328569,-0.0323042290795918,1.81793247793473  
, -0.0177697628881636,0.985822526670066,NA  
"20117","AC073592.1",2.23484894685147,0.0219443454574019,1.16853339318  
754,0.0187793909744776,0.985017094544397,NA  
"20118","THRIL",1.34063929104149,0.752659217969629,1.50380255352616,0.  
500504016438044,0.616720228757361,NA  
"20119","TMEM132B",0,NA,NA,NA,NA,NA  
"20120","LINC02824",0,NA,NA,NA,NA,NA  
"20121","LINC00943",0.0644961186387932,-0.0533240139618838,3.352475197  
53738,-0.015905863822961,0.987309491940711,NA  
"20122","AC079949.1",1.52979370655111,-0.106472833354166,1.34397957205  
989,-0.079222062275081,0.936855996583283,NA  
"20123","AC079949.5",0.748728649267754,1.63268048486144,1.696753765355  
61,0.962237726061132,0.335930202490741,NA  
"20124","AC079949.6",0.102686272020481,-0.0533240139618846,3.352475197  
53738,-0.0159058638229612,0.987309491940711,NA  
"20125","LINC02376",0.201646305276721,-1.9490730241217,3.3359781915796  
, -0.584258323103367,0.559046527482917,NA  
"20126","AC025160.1",0.168565237602375,-1.35173207482145,3.35247519753  
738,-0.40320419844251,0.686798011343181,NA  
"20127","GLT1D1",0.632195855327749,1.28995874044672,2.31268428355263,0  
.557775546632397,0.576997662777941,NA  
"20128","LINC02419",0.594088976058244,-1.15086483106251,1.837879052008  
16,-0.626191821385101,0.531189131022747,NA  
"20129","PIWIL1",1.0982272530008,-0.733969725397134,1.45454047965828,-  
0.504605912081297,0.613835656582062,NA  
"20130","RIMBP2",0.206616213750315,0.576034718369261,3.3406888072366,0  
.172429924368129,0.863099548245903,NA  
"20131","AC073862.1",0.985161974482278,-0.045777831505221,1.4855584765  
6749,-0.0308152336157069,0.975416891521101,NA  
"20132","ADGRD1-

AS1",0.547742145816676,2.01946164427378,2.05094945353351,0.98464720366  
1951,0.324797394643658,NA  
"20133","AC078925.1",0.102686272020481,-0.0533240139618846,3.352475197  
53738,-0.0159058638229612,0.987309491940711,NA  
"20134","AC073578.2",0,NA,NA,NA,NA,NA  
"20135","AC131009.2",1.24226110335205,1.06563553411435,2.0293614759601  
9,0.525108782608648,0.599507571068495,NA  
"20136","AC131009.3",0.426549712157548,0.430454523828902,2.85338122803  
838,0.150857698087832,0.880087970534561,NA  
"20137","LINC02361",1.77267144685617,-0.583384932999812,1.115521243324  
51,-0.522970706735437,0.600994638452868,NA  
"20138","AC148476.1",0,NA,NA,NA,NA,NA  
"20139","AC131212.1",1.11342655033349,0.362349374740318,1.405761332041  
,0.257760237446729,0.796591953631089,NA  
"20140","AL139327.2",1.22240839269011,1.4915379281177,1.830878728677,0  
.814656866539426,0.415268749765736,NA  
"20141","PSPC1-  
AS2",0.333884508879529,-1.5113465063233,2.58424426686441,-0.5848311344  
6435,0.558661267333854,NA  
"20142","GJB2",0.100823152638361,-1.35173207482145,3.35247519753738,-0  
.40320419844251,0.686798011343181,NA  
"20143","AL590096.1",1.34445187876362,-0.623433364813141,1.27002296656  
48,-0.490883536145352,0.623508822197926,NA  
"20144","SKA3",0.696922302753061,1.44731375085256,2.61967216052652,0.5  
52478960024398,0.58062024568563,NA  
"20145","ZDHHC20-IT1",0,NA,NA,NA,NA,NA  
"20146","AL136962.1",0.287785067625315,-0.774666036310719,3.1203959310  
9626,-0.248258891953677,0.803934102976972,NA  
"20147","C1QTNF9B",0,NA,NA,NA,NA,NA  
"20148","AL445985.2",0,NA,NA,NA,NA,NA  
"20149","AL445985.1",0.0644961186387932,-0.0533240139618838,3.35247519  
753738,-0.015905863822961,0.987309491940711,NA  
"20150","SPATA13-AS1",0,NA,NA,NA,NA,NA  
"20151","C1QTNF9",0.106924501560529,0.385965786494404,3.34626872025989  
,0.115342137395477,0.908173940404949,NA  
"20152","AL359538.4",0,NA,NA,NA,NA,NA  
"20153","AL359538.3",0,NA,NA,NA,NA,NA  
"20154","PABPC3",0.46782611872947,0.829900806882443,2.11194779115797,0  
.39295517169362,0.694352591299542,NA  
"20155","AL590787.1",0.491987844421934,0.816214377309575,2.37729355838  
537,0.343337647313502,0.731344461716096,NA  
"20156","ATP8A2",1.05908773576358,3.07969962723805,1.95096352276889,1.  
57855315657937,0.114438586407123,NA  
"20157","SHISA2",1.05088194961899,-1.17693999688026,1.42426347435841,-  
0.826349912125943,0.40860562771873,NA  
"20158","AL138966.2",2.22241665291411,0.00655797724997301,1.0508983071  
2679,0.00624035380540562,0.995020950360445,NA  
"20159","AL159978.1",0.507397653130442,-0.12186569960782,2.39131754007  
629,-0.0509617386923577,0.959356009010124,NA  
"20160","USP12-

AS2",0.428643702132955,0.231839855979674,2.16669907706373,0.1070014098  
56074,0.914787861274528,NA  
"20161","FLT3",0.848580997550514,-2.9099788493197,1.78503374366395,-1.  
6302094342187,0.10305724068372,NA  
"20162","FLT1",0.991276133306303,-1.25370146340858,1.52584220474013,-0  
.8216455538547,0.411278654857796,NA  
"20163","MTUS2",1.72074789316982,-0.976356362064969,1.34183571097597,-  
0.727627349666244,0.466841733897328,NA  
"20164","LINC00544",0,NA,NA,NA,NA,NA  
"20165","LINC00365",0.677145672388054,0.600749985862699,2.192055865476  
19,0.274057789915037,0.784040211109594,NA  
"20166","LINC00384",0.470495363917876,0.745578136943528,2.136837244793  
24,0.34891667054206,0.727151869486499,NA  
"20167","LINC00426",1.48878312324166,1.97117738762115,1.49630041941909  
,1.31736739630563,0.187715504091198,NA  
"20168","AL353648.1",1.02372566409583,-1.22425331865679,1.451388302234  
86,-0.843505019829415,0.398946059485175,NA  
"20169","LINC00398",0,NA,NA,NA,NA,NA  
"20170","TEX26",1.07273566837875,0.854836081578317,1.53310994961788,0.  
557583023834254,0.577129151374848,NA  
"20171","FRY-  
AS1",1.30652404498684,-1.95340435501909,1.65653219178465,-1.1792130359  
4746,0.238313356502644,NA  
"20172","STARD13-  
IT1",0.389088492702695,1.57791456375365,2.49326979048727,0.63286956340  
3832,0.526818825201591,NA  
"20173","STARD13-  
AS",0.870471400498458,1.78416645026182,1.74972824390343,1.019682031468  
82,0.307879286197018,NA  
"20174","AL627232.1",2.2106355219463,0.621579970982655,1.0983434471742  
4,0.565924959612426,0.571444793407217,NA  
"20175","LINC02344",0.386926462243525,1.51070939514628,2.9406339565750  
4,0.513735955394397,0.607436610092053,NA  
"20176","AL138999.1",0.925854183014555,-0.813560397963293,1.5459141883  
654,-0.526264914369877,0.598704156947147,NA  
"20177","LINC00445",0.167182390659274,0.576034712544328,3.340688807398  
52,0.172429922616139,0.863099549623161,NA  
"20178","SOHLH2",0.338603010858597,1.47050837137699,2.50725969105718,0  
.58650022437722,0.557539410788656,NA  
"20179","CCDC169",0.541082060075576,-0.48599471264493,1.89998431741555  
, -0.255788802144432,0.798113920934247,NA  
"20180","CCNA1",0.511568240720285,0.936418993832649,2.77825760509041,0  
.337052616041404,0.736077236406564,NA  
"20181","AL354809.1",1.46108022951544,2.48482290079293,1.4922145390238  
3,1.66519145592727,0.0958745650331397,NA  
"20182","LINC00332",0.333884508879529,-1.5113465063233,2.5842442668644  
1,-0.58483113446435,0.558661267333854,NA  
"20183","AL354696.1",0.822335167053816,-0.489308476891135,1.5218668403  
2014,-0.321518587518606,0.747817428605294,NA  
"20184","LINC02341",0,NA,NA,NA,NA,NA

"20185", "TNFSF11", 0.4410650332435, -1.51464669453298, 2.39690626242459, -0.631917367098386, 0.5274408743423, NA  
"20186", "AL161714.1", 0.102686272020481, -0.0533240139618846, 3.35247519753738, -0.0159058638229612, 0.987309491940711, NA  
"20187", "NRAD1", 0, NA, NA, NA, NA, NA  
"20188", "LINC00390", 0.128992237277586, 0.513744972953418, 3.34245151459318, 0.153703044220807, 0.877843884367224, NA  
"20189", "SMIM2-AS1", 0.782421071523755, -2.36921868239193, 1.78915935585216, -1.32420774853981, 0.185434058166207, NA  
"20190", "AL589745.1", 0, NA, NA, NA, NA, NA  
"20191", "AL356515.1", 2.25211431960195, 0.934118410451721, 1.26902139335843, 0.736093509014532, 0.461673792739553, NA  
"20192", "AL138963.4", 1.87461519274949, 2.94874563114552, 1.35946448280716, 2.16904940764371, 0.0300789330676326, NA  
"20193", "AL138963.1", 0.37379860440959, 1.51493741483916, 2.51101047483098, 0.603317839580552, 0.546297267431531, NA  
"20194", "SLC25A30-AS1", 0.454512123486993, -0.895655134296266, 2.15226028124468, -0.416146291459831, 0.67730295801868, NA  
"20195", "ERICH6B", 0.221906102043421, 0.695830468846429, 3.33747149841039, 0.208490310457437, 0.834846147549618, NA  
"20196", "AL139801.1", 0, NA, NA, NA, NA, NA  
"20197", "LINC00563", 0.0534622507802646, -0.0533240139618838, 3.35247519753738, -0.015905863822961, 0.987309491940711, NA  
"20198", "LINC01198", 0.102686272020481, -0.0533240139618846, 3.35247519753738, -0.0159058638229612, 0.987309491940711, NA  
"20199", "AL359880.1", 0.195582345891787, 0.494635591052761, 3.34300496985029, 0.147961368742719, 0.882373255878367, NA  
"20200", "AL157369.1", 0.562576699312185, 1.05651484387357, 2.36487882645705, 0.446752210749163, 0.65505397977416, NA  
"20201", "AL158196.1", 0.350898339321007, 1.45361411466565, 2.54576915420314, 0.570992115394946, 0.568004987527943, NA  
"20202", "RB1-DT", 1.89769756665375, -0.434635590761491, 0.979102248405167, -0.443912361011791, 0.6571059472905, NA  
"20203", "AL392048.1", 0.925238033841911, 1.77248462091369, 1.66173297196977, 1.0666482827338, 0.286130688966555, NA  
"20204", "AL157813.2", 0.165319271277154, -0.774663427007578, 3.35247519753738, -0.231072082972193, 0.817258802814835, NA  
"20205", "AL157813.1", 0.6393767590841, 2.27753014501133, 1.89314410266062, 1.20304109011591, 0.228960420107455, NA  
"20206", "CYSLTR2", 0.883411633854657, -0.0506643588005041, 1.69188750077462, -0.0299454655095612, 0.976110545859186, NA  
"20207", "ARL11", 0.449268241577772, -0.680616756960558, 2.45745186941028, -0.276960361027899, 0.781810543250041, NA  
"20208", "AL136301.1", 0.44207047104394, -0.953743253576691, 2.15481320550325, -0.442610640746442, 0.658047386860537, NA  
"20209", "AL137060.3", 1.28251447725332, -1.10986529115353, 1.69646842418195, -0.654221013095906, 0.512969425502434, NA



"20210", "DLEU7", 0.928960972106028, -0.111401007700954, 1.57076857540808, -0.0709213371371481, 0.943460361553629, NA  
"20211", "RNASEH2B-  
AS1", 1.76489196457022, 0.319137177174311, 1.19405352303288, 0.26727208707  
0023, 0.789259676551356, NA  
"20212", "SERPINE3", 0.102686272020481, -0.0533240139618846, 3.35247519753  
738, -0.0159058638229612, 0.987309491940711, NA  
"20213", "TMEM272", 0, NA, NA, NA, NA, NA  
"20214", "AL359513.1", 0.959848272439999, 0.216202457044529, 1.51960199866  
729, 0.142275712478755, 0.886862229985507, NA  
"20215", "PCDH8", 0, NA, NA, NA, NA, NA  
"20216", "PCDH17", 1.54809881124935, 2.76868418623721, 1.56122611400258, 1.  
77340371225217, 0.076161834317167, NA  
"20217", "DIAPH3", 0.596355874462566, -1.01080715724333, 1.99026101791498,  
-0.507876679563501, 0.611539830212797, NA  
"20218", "LINC00364", 0.231223174500471, -0.207595008908767, 3.34245142718  
562, -0.062108609034766, 0.950476341218052, NA  
"20219", "DACH1", 0.203509424658842, -0.774663427007579, 3.35247519753738,  
-0.231072082972194, 0.817258802814834, NA  
"20220", "AL159972.1", 0.576991871504582, -1.29247972510185, 2.03252803488  
038, -0.635897612687991, 0.52484315879548, NA  
"20221", "LINC00402", 0.0644961186387932, -0.0533240139618838, 3.352475197  
53738, -0.015905863822961, 0.987309491940711, NA  
"20222", "AL353660.1", 0.203509424658842, -0.774663427007579, 3.3524751975  
3738, -0.231072082972194, 0.817258802814834, NA  
"20223", "LINC00381", 0.49681912006951, 0.84882275827801, 2.12574639214682  
, 0.399305750400815, 0.689667930539341, NA  
"20224", "AL137244.1", 0.244351032334407, -0.774664026145693, 3.3006297283  
3046, -0.234701887187309, 0.814440122883676, NA  
"20225", "LINC01034", 0.541592349650519, -3.03185614220242, 2.513766463056  
29, -1.20610095916238, 0.22777856507395, NA  
"20226", "AL161717.1", 0.540664837505015, -0.336515194221918, 2.0932810642  
4961, -0.160759680087466, 0.872282682739584, NA  
"20227", "ACOD1", 0, NA, NA, NA, NA, NA  
"20228", "AC001226.1", 0.324137039266305, -0.0524131773797337, 2.653492295  
94242, -0.0197525266833754, 0.984240788704199, NA  
"20229", "MYCBP2-  
AS2", 0.166727055861678, -0.774663427007578, 3.35247519753738, -0.23107208  
2972193, 0.817258802814835, NA  
"20230", "SCEL", 0, NA, NA, NA, NA, NA  
"20231", "SLAIN1", 1.0532004037987, -0.0718880823740626, 1.59927414682398,  
-0.0449504436227061, 0.96414680925382, NA  
"20232", "EDNRB-AS1", 0, NA, NA, NA, NA, NA  
"20233", "OBI1-  
AS1", 0.231223174500471, -0.207595008908767, 3.34245142718562, -0.06210860  
9034766, 0.950476341218052, NA  
"20234", "POUF1", 0, NA, NA, NA, NA, NA  
"20235", "AL158064.1", 0.341125932066361, 1.37790492328387, 3.032905404719  
36, 0.454318463457443, 0.649599628836418, NA  
"20236", "AL137781.1", 0.532031017445837, 0.118200532925302, 2.05049937376

35,0.0576447544621076,0.9540316000139,NA  
"20237","SLITRK5",0,NA,NA,NA,NA,NA  
"20238","AL162456.1",0.100823152638361,-1.35173207482145,3.35247519753  
738,-0.40320419844251,0.686798011343181,NA  
"20239","AL138955.1",1.75123543198876,0.0498405147854632,1.19674253867  
614,0.0416468147280849,0.966780252837466,NA  
"20240","AL442067.3",2.18376714506375,-0.389888004198043,1.03766309514  
539,-0.375736600850603,0.707112724800764,NA  
"20241","AL442067.1",0.284110384636469,-0.774665791363346,3.1429112689  
4145,-0.246480325110883,0.805310433006106,NA  
"20242","AL442067.2",0.385362253938455,-0.760480911646976,2.5246208332  
356,-0.301225792655893,0.763242322986929,NA  
"20243","GPR18",1.3275244295111,-0.223410064431802,1.41896565326596,-0  
.157445716827318,0.874893585899345,NA  
"20244","LINC00449",0.655729712100089,-2.51965113818868,1.762414505326  
02,-1.4296586475964,0.15281501423352,NA  
"20245","CLYBL-AS2",0,NA,NA,NA,NA,NA  
"20246","AL137139.2",0.221906102043421,0.695830468846429,3.33747149841  
039,0.208490310457437,0.834846147549618,NA  
"20247","AL353697.1",0.102686272020481,-0.0533240139618846,3.352475197  
53738,-0.0159058638229612,0.987309491940711,NA  
"20248","AL136526.1",0,NA,NA,NA,NA,NA  
"20249","NALCN",0.102686272020481,-0.0533240139618846,3.35247519753738  
, -0.0159058638229612,0.987309491940711,NA  
"20250","AL158063.1",1.16103560555833,-0.36422966286182,1.680746120703  
7,-0.216707126897502,0.828436593526078,NA  
"20251","LINC00343",0.102686272020481,-0.0533240139618846,3.3524751975  
3738,-0.0159058638229612,0.987309491940711,NA  
"20252","AL138689.2",0.407018849317684,-0.641887875749317,2.8875822443  
6901,-0.222292499893654,0.824086190277054,NA  
"20253","LINC00551",0.509705121338165,-0.0585305308992107,2.7659208219  
7377,-0.0211613182974063,0.983116970894323,NA  
"20254","AL445649.1",0,NA,NA,NA,NA,NA  
"20255","AL157762.1",1.02814909422295,1.06697275130505,1.4420342670857  
6,0.739908042172477,0.459355794266896,NA  
"20256","AL138694.1",0.634822371980203,-0.139317344648456,1.8923336678  
5321,-0.0736219764067864,0.941311183947084,NA  
"20257","MY016",0.905227963077188,0.375403755111386,1.42605860922831,0  
.263245670747382,0.792361231596986,NA  
"20258","AL163541.1",0,NA,NA,NA,NA,NA  
"20259","AL390755.3",0.475241206720717,1.88167515318861,2.768936268645  
74,0.679566075426115,0.496779256323436,NA  
"20260","COL4A2-  
AS2",0.54372468713001,-1.09952442299193,2.3109258330227,-0.47579390358  
6142,0.634221213530336,NA  
"20261","ARHGEF7-  
AS2",2.34204816508164,-0.128317460649495,0.937458725929467,-0.13687798  
4171806,0.891127241112694,NA  
"20262","ARHGEF7-  
IT1",0.581564049503009,1.15553679862368,2.06345919865494,0.55999982911

0707,0.575479554260207,NA  
"20263","AL353704.1",0.950374954544475,0.554549251498732,1.60000984164  
373,0.34659115029507,0.728898495324707,NA  
"20264","TEX29",0.914084234482297,-3.08439436229759,1.59126011818096,-  
1.93833448539105,0.0525824276969983,NA  
"20265","AL139384.2",1.16148464355447,1.03112962580054,1.6271778816739  
7,0.633692012049571,0.526281839001341,NA  
"20266","ATP11A-  
AS1",0.848953982352977,0.647067382575446,1.98251657490135,0.3263868714  
98234,0.744131669189384,NA  
"20267","AL356752.1",0.11921983002294,-0.0533240139618846,3.3524751975  
3738,-0.0159058638229612,0.987309491940711,NA  
"20268","MCF2L-AS1",0,NA,NA,NA,NA,NA  
"20269","AL137002.2",0.32883060360395,1.37704104152891,2.5806918274876  
6,0.533593754535765,0.593622630184078,NA  
"20270","AL136221.1",0.713663075872068,2.4582899279739,1.7050870090587  
3,1.44173870008602,0.1493761017031,NA  
"20271","AL442125.2",0.273505233441565,-0.226106766776126,2.7449021822  
0006,-0.082373342205914,0.934349833830783,NA  
"20272","GAS6-  
AS1",1.38393447893765,0.00786309201087948,1.38871180551888,0.005662148  
17187467,0.995482283532302,NA  
"20273","LINC00565",0.701385538304187,2.44980065430364,1.8929697211583  
8,1.29415733750063,0.195611079643513,NA  
"20274","C13orf46",0.604198956427636,2.23155881697135,2.16146178194787  
1,0.03243038373795,0.301870544468274,NA  
"20275","RASA3-IT1",0,NA,NA,NA,NA,NA  
"20276","CFAP97D2",0,NA,NA,NA,NA,NA  
"20277","AL589743.4",1.14259762622202,3.12571550120424,2.2829790700684  
1,1.36913892123881,0.170955854039915,NA  
"20278","OR11G2",0,NA,NA,NA,NA,NA  
"20279","RNASE3",0,NA,NA,NA,NA,NA  
"20280","AL355922.1",0,NA,NA,NA,NA,NA  
"20281","RNASE2",0.0534622507802646,-0.0533240139618838,3.352475197537  
38,-0.015905863822961,0.987309491940711,NA  
"20282","AL161668.3",0.466833855514643,0.37579093201435,2.150843477731  
24,0.174717935500701,0.861301274058197,NA  
"20283","SLC39A2",0.461888884682472,-0.261206259066425,2.1654305904116  
4,-0.120625551436756,0.903987629498604,NA  
"20284","RNASE13",0,NA,NA,NA,NA,NA  
"20285","TMEM253",1.18861698308875,-0.548547197779679,1.48709153920805  
,-0.368872516127559,0.712222749917379,NA  
"20286","RPGRIPI",0,NA,NA,NA,NA,NA  
"20287","AL135744.1",0.815283720500626,-0.631060154269815,1.6336678310  
658,-0.386284250855398,0.6992861630662,NA  
"20288","AL161747.2",0,NA,NA,NA,NA,NA  
"20289","TRAV3",0,NA,NA,NA,NA,NA  
"20290","TRAV5",0,NA,NA,NA,NA,NA  
"20291","TRAV6",0.11921983002294,-0.0533240139618846,3.35247519753738,  
-0.0159058638229612,0.987309491940711,NA

"20292", "TRAV8-2", 0.100823152638361, -1.35173207482145, 3.35247519753738, -0.40320419844251, 0.686798011343181, NA  
"20293", "TRAV8-4", 0, NA, NA, NA, NA, NA  
"20294", "TRAV13-2", 0, NA, NA, NA, NA, NA  
"20295", "TRAV14DV4", 0, NA, NA, NA, NA, NA  
"20296", "TRAV9-2", 0, NA, NA, NA, NA, NA  
"20297", "TRAV17", 0, NA, NA, NA, NA, NA  
"20298", "TRAV19", 0, NA, NA, NA, NA, NA  
"20299", "TRAV20", 0, NA, NA, NA, NA, NA  
"20300", "TRAV22", 0, NA, NA, NA, NA, NA  
"20301", "TRAV23DV6", 0, NA, NA, NA, NA, NA  
"20302", "TRDV1", 0.117958369419058, 0.451348601316665, 3.34428110054629, 0.134961322851401, 0.892642454377335, NA  
"20303", "TRAV26-1", 0.142120095111522, -0.0533240139618842, 3.35247519753738, -0.0159058638229611, 0.987309491940711, NA  
"20304", "TRAV27", 0, NA, NA, NA, NA, NA  
"20305", "TRAV29DV5", 0, NA, NA, NA, NA, NA  
"20306", "AC244502.1", 1.02186452256322, -0.417724729185351, 1.61140180871799, -0.259230644352873, 0.795457288253234, NA  
"20307", "TRAV41", 0, NA, NA, NA, NA, NA  
"20308", "TRDV2", 0, NA, NA, NA, NA, NA  
"20309", "LINC02332", 0.204917209243366, -0.774663427007578, 3.35247519753738, -0.231072082972194, 0.817258802814834, NA  
"20310", "AC243965.1", 0, NA, NA, NA, NA, NA  
"20311", "AL160314.2", 2.24162495808038, 1.83395204886058, 1.31510783200425, 1.39452598808236, 0.163158827349116, NA  
"20312", "REM2", 1.10898879423056, -0.123396747341223, 1.38441694702778, -0.0891326472174047, 0.928976491916027, NA  
"20313", "PRMT5-AS1", 0.385362253938455, -0.760480911646976, 2.5246208332356, -0.301225792655893, 0.763242322986929, NA  
"20314", "AL132780.1", 2.15191193360421, 2.4296810446917, 1.25030328178776, 1.94327334822123, 0.0519831399121328, NA  
"20315", "AL132780.2", 1.63968482831682, 1.83157571920041, 1.36932540567068, 1.33757521157166, 0.181034949492939, NA  
"20316", "CDH24", 0.979771768592416, 0.0993686090090144, 1.54687462910586, 0.064238308095112, 0.948780474921454, NA  
"20317", "CEBPE", 0, NA, NA, NA, NA, NA  
"20318", "AL049829.2", 0, NA, NA, NA, NA, NA  
"20319", "CMTM5", 0.480267771172522, 0.867768471987108, 2.07432029418512, 0.418338708067262, 0.675699492494923, NA  
"20320", "MYH7", 0, NA, NA, NA, NA, NA  
"20321", "THTPA", 1.33997927724808, 0.457585418912084, 1.37123521301223, 0.333703083591979, 0.738603622475098, NA  
"20322", "JPH4", 0.168565237602375, -1.35173207482145, 3.35247519753738, -0.40320419844251, 0.686798011343181, NA  
"20323", "DHRS2", 0.0534622507802646, -0.0533240139618838, 3.35247519753738, -0.015905863822961, 0.987309491940711, NA  
"20324", "CARMIL3", 0.86181285736659, 0.558744712640018, 1.96748129965853, 0.283989846682148, 0.776418161625221, NA

"20325", "FITM1", 1.05266546285362, -1.53360747597545, 1.45966374957201, -1.05065805492883, 0.293415667122766, NA  
"20326", "AL136295.17", 0.450460031355486, 0.813250048506344, 2.12939262058488, 0.381916439760634, 0.702523345790678, NA  
"20327", "AL136295.6", 1.02330057208857, -1.03646249361496, 1.44575138863864, -0.716902298527907, 0.473434383617623, NA  
"20328", "TSSK4", 0.0644961186387932, -0.0533240139618838, 3.35247519753738, -0.015905863822961, 0.987309491940711, NA  
"20329", "TGM1", 0.666403239020684, 1.14000549262926, 1.78072359958907, 0.640192275147212, 0.522047604287996, NA  
"20330", "AL096870.6", 0.370236480520519, -0.776097354626079, 2.25816971304894, -0.343684245759458, 0.731083760326458, NA  
"20331", "LTB4R2", 0.936829151450177, 2.04778157599598, 1.64188195766504, 1.24721607813279, 0.212318279100118, NA  
"20332", "LINC02293", 0.244351032334407, -0.774664026145693, 3.30062972833046, -0.234701887187309, 0.814440122883676, NA  
"20333", "MIR4307HG", 0.100823152638361, -1.35173207482145, 3.35247519753738, -0.40320419844251, 0.686798011343181, NA  
"20334", "AL356756.1", 0.424960191904666, -0.699145451204289, 2.21059536464168, -0.316270205930525, 0.751797423586746, NA  
"20335", "AL049830.3", 0.676432177199842, -0.244174231477096, 1.98405354130275, -0.123068368062672, 0.902052959458482, NA  
"20336", "AL139353.2", 1.11021544310753, 2.06020453180551, 1.59901015129034, 1.28842492347094, 0.197598087481102, NA  
"20337", "LINC02313", 0, NA, NA, NA, NA, NA  
"20338", "AL161665.1", 2.35120552484077, -0.306768108439947, 0.959394795150388, -0.319751691368994, 0.749156571132125, NA  
"20339", "AKAP6", 0.338603010858597, 1.47050837137699, 2.50725969105718, 0.58650022437722, 0.557539410788656, NA  
"20340", "AL133163.2", 0, NA, NA, NA, NA, NA  
"20341", "AL162311.3", 1.40143679055237, -0.650131136372155, 1.2970876298263, -0.501223758073477, 0.61621365566482, NA  
"20342", "AL162311.1", 0.167182390659274, 0.576034712544328, 3.34068880739852, 0.172429922616139, 0.863099549623161, NA  
"20343", "PAX9", 0.443933590426061, 0.376953447618234, 2.17283624781119, 0.173484517297592, 0.862270596766062, NA  
"20344", "AL121790.1", 0.285946885884618, -0.151037280028445, 2.72272184641806, -0.0554729012172675, 0.955761718393871, NA  
"20345", "LINC00639", 0.102230937222884, -1.35173207482145, 3.35247519753738, -0.403204198442509, 0.686798011343181, NA  
"20346", "SEC23A-AS1", 0.481273423541694, 0.616171887409792, 2.38549784041638, 0.258299075761159, 0.796176099506425, NA  
"20347", "LINC02315", 0.93578247218298, 1.69485871536129, 1.84259897571967, 0.919819633949009, 0.357667021405465, NA  
"20348", "LINC02302", 0.843977810763616, -0.130291644606867, 1.58294841246298, -0.0823094698355589, 0.934400624134907, NA  
"20349", "AL049870.3", 1.04098135110259, 0.649606211294535, 1.47679388352593, 0.439876016918191, 0.660026906967839, NA  
"20350", "AL162632.3", 0.70044993106757, -0.549094958513684, 1.64591080885

358,-0.333611612221042,0.738672654537663,NA  
"20351","AL139099.1",1.16091345483972,-0.777604237091712,1.26245984132  
993,-0.615943740652017,0.537931651462457,NA  
"20352","AL139099.2",0,NA,NA,NA,NA,NA  
"20353","AL591767.1",0.244806367132003,0.695807100884759,3.33664907448  
574,0.208534696143316,0.834811494458112,NA  
"20354","AL118556.1",0,NA,NA,NA,NA,NA  
"20355","AL133485.2",0,NA,NA,NA,NA,NA  
"20356","AL133485.3",0.203509424658842,-0.774663427007579,3.3524751975  
3738,-0.231072082972194,0.817258802814834,NA  
"20357","AL358334.2",1.91599614716591,-0.347094504889508,1.22255154785  
223,-0.283909914063976,0.776479418671662,NA  
"20358","AL358334.4",0.165319271277154,-0.774663427007578,3.3524751975  
3738,-0.231072082972193,0.817258802814835,NA  
"20359","AL358332.1",0.195582345891787,0.494635591052761,3.34300496985  
029,0.147961368742719,0.882373255878367,NA  
"20360","FRMD6-  
AS2",0.20961077358101,0.88584532733971,3.33280883148308,0.265795421258  
984,0.790396769724465,NA  
"20361","AL122125.1",0.287785067625315,-0.774666036310719,3.1203959310  
9626,-0.248258891953677,0.803934102976972,NA  
"20362","AL079307.1",0.102686272020481,-0.0533240139618846,3.352475197  
53738,-0.0159058638229612,0.987309491940711,NA  
"20363","AL358333.2",0.102686272020481,-0.0533240139618846,3.352475197  
53738,-0.0159058638229612,0.987309491940711,NA  
"20364","AL358333.3",0.183715948661733,0.576034712544328,3.34068880739  
852,0.172429922616139,0.863099549623161,NA  
"20365","AL352979.2",0,NA,NA,NA,NA,NA  
"20366","AL356020.1",0.698638367460845,0.179600331431194,1.76493174786  
942,0.101760496771619,0.918946781833408,NA  
"20367","AL365295.2",0,NA,NA,NA,NA,NA  
"20368","AL163953.1",0.102686272020481,-0.0533240139618846,3.352475197  
53738,-0.0159058638229612,0.987309491940711,NA  
"20369","LINC02331",0,NA,NA,NA,NA,NA  
"20370","AL138479.2",1.32370152748033,0.608251063700914,1.387117772701  
85,0.438499942594027,0.661023911758057,NA  
"20371","AL133444.1",0.330638542554308,-0.807230023191745,3.0510233423  
1092,-0.264576810015596,0.791335486599417,NA  
"20372","DLGAP5",0.509235834871139,-0.807413585280286,2.37498144092178  
, -0.339966271469857,0.733881928163605,NA  
"20373","AL163952.1",0.527767850264366,-1.42734997161409,1.87393297717  
608,-0.761686778021821,0.446246968537911,NA  
"20374","AL355073.1",0.205372544040962,0.695830627438559,3.33747149429  
751,0.208490358233014,0.834846110249776,NA  
"20375","AL355073.2",2.26964040641442,0.0817327021756517,1.12518024673  
63,0.0726396525469818,0.942092871881046,NA  
"20376","LINC02284",0.324592374063902,1.32629053141379,3.0734755221496  
3,0.431527930466861,0.666084548480396,NA  
"20377","AL161757.2",0.102230937222884,-1.35173207482145,3.35247519753  
738,-0.403204198442509,0.686798011343181,NA

"20378", "SLC35F4", 0.494296198861746, 0.996615237597183, 2.04202978741052, 0.488051273170204, 0.625513523860686, NA  
"20379", "AL161804.1", 0.733312580044441, 1.49688190208349, 1.71303399055526, 0.873819147977494, 0.382216750997115, NA  
"20380", "AL132989.1", 1.02387275245586, 0.153532800353477, 1.38887592724197, 0.110544647899804, 0.911977442913441, NA  
"20381", "AL132989.2", 0.324592374063902, 1.32629053141379, 3.07347552214963, 0.431527930466861, 0.666084548480396, NA  
"20382", "TOMM20L", 1.25005135704127, 1.03522567780694, 1.37297863363355, 0.753999845625595, 0.450849314441134, NA  
"20383", "LINC01500", 0.505989868545918, -0.145638326510175, 2.13817308828657, -0.0681134410062579, 0.945695330830926, NA  
"20384", "CCDC175", 0, NA, NA, NA, NA, NA  
"20385", "LRR9", 0.102686272020481, -0.0533240139618846, 3.35247519753738, -0.0159058638229612, 0.987309491940711, NA  
"20386", "AL157911.1", 0, NA, NA, NA, NA, NA  
"20387", "AL157756.1", 0.102230937222884, -1.35173207482145, 3.35247519753738, -0.403204198442509, 0.686798011343181, NA  
"20388", "C14orf39", 2.20766261034259, 2.44290483931952, 1.20843899418052, 2.02153757954173, 0.0432241462717331, NA  
"20389", "AL049874.3", 2.19495635611108, 2.27839518907311, 1.28460134398203, 1.77362043076376, 0.0761259559170086, NA  
"20390", "SALRNA1", 0, NA, NA, NA, NA, NA  
"20391", "AL355916.2", 0.201646305276721, -1.9490730241217, 3.3359781915796, -0.584258323103367, 0.559046527482917, NA  
"20392", "AL355916.1", 1.03423945717312, 0.449185012867331, 1.61880752685966, 0.277478950038433, 0.781412366918778, NA  
"20393", "SYT16", 0.464207338862189, 1.84892005394169, 2.78258565578215, 0.664461146092547, 0.506395208686958, NA  
"20394", "AL136038.3", 0.868624584941672, 0.414996201901216, 1.50872026452742, 0.275065041319112, 0.783266268950584, NA  
"20395", "AL161756.1", 0.468255049961827, 0.778245414755057, 2.40076795255901, 0.324165196359571, 0.745812969843302, NA  
"20396", "AL122035.1", 0.324592374063902, 1.32629053141379, 3.07347552214963, 0.431527930466861, 0.666084548480396, NA  
"20397", "AKAP5", 2.24976454253722, 1.18519894657571, 1.10335177628376, 1.07418048536398, 0.282741796953383, NA  
"20398", "AL049869.3", 0.11921983002294, -0.0533240139618846, 3.35247519753738, -0.0159058638229612, 0.987309491940711, NA  
"20399", "PPP1R36", 1.92265700999083, 0.515200861978254, 1.09865434901867, 0.468938080879067, 0.639113895592192, NA  
"20400", "SPTB", 0.686737660942196, 1.39738327048459, 1.78842227382592, 0.781349735426414, 0.43459682562137, NA  
"20401", "AL139022.2", 0.79206824050966, 0.429479516906072, 1.97679502430088, 0.217260521008223, 0.828005321918952, NA  
"20402", "AL391261.2", 0.810053227745751, -1.29495460422557, 1.71141412746553, -0.756657657222509, 0.44925498882466, NA  
"20403", "AL157997.1", 0.11921983002294, -0.0533240139618846, 3.35247519753738, -0.0159058638229612, 0.987309491940711, NA  
"20404", "AL135978.2", 0.489456310543459, -0.211403077634398, 1.9584631820

8952,-0.107943350463626,0.91404062930046,NA  
"20405","ARG2",1.62363729278438,-1.09037523991457,1.43152387577494,-0.761688476431669,0.446245954624959,NA  
"20406","AL049779.4",0.102230937222884,-1.35173207482145,3.35247519753738,-0.403204198442509,0.686798011343181,NA  
"20407","RDH12",0.42876970478109,-1.06229143512552,2.45486111129827,-0.432729750060572,0.665211114150325,NA  
"20408","AL133370.1",0.672878103466399,-1.67708064919776,2.22570646673015,-0.753504864305672,0.451146589359277,NA  
"20409","AL121820.3",1.13505729195814,2.11193997194275,1.83319862766477,1.15205190538084,0.249299744721874,NA  
"20410","AL133313.1",0.244806367132003,0.695807100884759,3.33664907448574,0.208534696143316,0.834811494458112,NA  
"20411","AL132986.1",0.156148522800746,0.494635591052761,3.34300496985029,0.147961368742719,0.882373255878367,NA  
"20412","ACTN1-AS1",0.203509424658842,-0.774663427007579,3.35247519753738,-0.231072082972194,0.817258802814834,NA  
"20413","AL391262.1",0.656304752744356,-1.40833324920272,1.75647735723795,-0.80179413836414,0.422672049907968,NA  
"20414","AL359317.2",1.0052796233541,-2.0917114413819,1.54656527738229,-1.35248829905345,0.176219159429976,NA  
"20415","PLEKHD1",0.557316707000985,0.422512864004692,2.33463630810996,0.180975881569641,0.856386507124644,NA  
"20416","SLC10A1",0.307603481263847,-0.0321837065735757,3.12361882183901,-0.0103033399429408,0.99177926958558,NA  
"20417","SLC8A3",0,NA,NA,NA,NA,NA  
"20418","AL356804.1",0.11921983002294,-0.0533240139618846,3.35247519753738,-0.0159058638229612,0.987309491940711,NA  
"20419","ADAM21",0.498388104421152,0.995826958213148,2.08109499021579,0.47851105446652,0.632286508208304,NA  
"20420","ADAM20",0.484523791607099,0.888550783446443,2.10408920613469,0.422297106441962,0.672808169934327,NA  
"20421","AL357153.1",0,NA,NA,NA,NA,NA  
"20422","MAP3K9",0.117958369419058,0.451348601316665,3.34428110054629,0.134961322851401,0.892642454377335,NA  
"20423","AC004816.1",0.269388390240736,-2.09481427187859,3.17548848369632,-0.659682528415343,0.509457580965155,NA  
"20424","AC004825.3",0.655472773183491,1.30126421566813,2.03740969992166,0.63868558970646,0.523027489037349,NA  
"20425","AC004817.3",0.77058971167503,-0.0577768226704364,1.77934794410912,-0.0324707839530306,0.974096614766864,NA  
"20426","AC004817.5",0.909479581771582,-0.221454930804895,1.68161593214681,-0.131691741598914,0.895228117874693,NA  
"20427","AC005476.2",0.296405498530148,-0.22601836373236,2.68538977137194,-0.0841659434849525,0.932924495242752,NA  
"20428","AC004974.1",0.512356575632042,-0.213101306988728,1.94475737224618,-0.109577323130339,0.912744595859955,NA  
"20429","RGS6",0.664352301737473,-0.326809308919909,2.59772242236958,-0.125806093101279,0.899885418501683,NA



"20430","DPF3",1.97463951220263,1.20367122892939,1.32461911651943,0.90869232817065,0.363512554924808,NA  
"20431","AC005280.2",1.68082632105387,-1.93038523272048,1.26019249505182,-1.53181775030418,0.125567414575679,NA  
"20432","AC005280.1",0.0534622507802646,-0.0533240139618838,3.35247519753738,-0.015905863822961,0.987309491940711,NA  
"20433","HEATR4",0.527646463925147,-0.0604133997871304,2.12939642465267,-0.0283711379843162,0.977366143483478,NA  
"20434","AC006146.1",0.204917209243366,-0.774663427007578,3.35247519753738,-0.231072082972194,0.817258802814834,NA  
"20435","LINC02274",0.406563514520087,-1.7939550059263,2.41951443461661,-0.741452491565964,0.458419127369659,NA  
"20436","AC005520.5",2.09258178436119,-0.152843208838513,1.14691452186285,-0.133264690545779,0.893984051343126,NA  
"20437","AC005519.1",2.30477181097193,0.101419531047627,0.990772068057682,0.10236414036828,0.918467645956087,NA  
"20438","SYNDIG1L",0.819214426292914,-0.87000319740545,1.66806311430214,-0.521564915587399,0.601973296479019,NA  
"20439","AC005479.2",0.441520368041097,-0.0650811968767756,2.44233317234728,-0.0266471411900889,0.978741173360975,NA  
"20440","AC013451.2",0,NA,NA,NA,NA,NA  
"20441","PROX2",1.39542240909331,-0.149994939128651,1.25026311607305,-0.119970698327701,0.904506359624778,NA  
"20442","RPS6KL1",0.930891917403179,1.20392907726724,1.75780881185188,0.684903312095062,0.493404935841041,NA  
"20443","AL049780.1",1.86224117425275,0.228264926523289,1.07991713448976,0.211372631503934,0.832596511170912,NA  
"20444","AL049780.2",0.273076516777941,-0.774665331385065,3.18476194606587,-0.243241204367569,0.807818548712931,NA  
"20445","AL691403.2",0.745543934521344,-1.38483982273676,1.60514984382598,-0.862748003286663,0.388276033249498,NA  
"20446","AF111167.1",0.102230937222884,-1.35173207482145,3.35247519753738,-0.403204198442509,0.686798011343181,NA  
"20447","AF111167.2",1.96121849028245,0.0137726048080566,1.03546889705674,0.0133008387284296,0.989387779039202,NA  
"20448","AC007182.1",0.226144331583469,0.885845475851209,3.33280882803988,0.265795466094045,0.790396735192843,NA  
"20449","AC016526.2",0,NA,NA,NA,NA,NA  
"20450","AC008050.1",0.0534622507802646,-0.0533240139618838,3.35247519753738,-0.015905863822961,0.987309491940711,NA  
"20451","AC007686.4",0.0534622507802646,-0.0533240139618838,3.35247519753738,-0.015905863822961,0.987309491940711,NA  
"20452","LINC02288",0.700337371967795,1.20297035760695,1.7479339636086,0.688224144991965,0.491311641317769,NA  
"20453","TMEM63C",0.172682080803205,0.494635591052761,3.34300496985029,0.147961368742719,0.882373255878367,NA  
"20454","SAMD15",1.88219822331826,0.255935402695032,1.06899694153348,0.239416403126367,0.810782711953679,NA  
"20455","NOXRED1",0.721134819841527,0.669873702303291,1.77576074421334,0.377231957900976,0.706001232676082,NA

"20456", "C14orf178", 0.780859233919007, -1.43513241239143, 1.86839046621494, -0.768111611754676, 0.442420878909729, NA  
"20457", "AL136040.2", 0.70214893557452, 0.284724314287336, 1.65943767999561, 0.17157879305723, 0.86376868087276, NA  
"20458", "LINC02301", 0.546820490249489, -2.14622588510136, 2.22682145435985, -0.963806901042431, 0.335142746155134, NA  
"20459", "LINC00911", 0.387346759659794, -0.990622673409685, 2.22889911013911, -0.444444824309637, 0.656721011979128, NA  
"20460", "LINC02316", 0.167182390659274, 0.576034712544328, 3.34068880739852, 0.172429922616139, 0.863099549623161, NA  
"20461", "LINC01146", 0.11921983002294, -0.0533240139618846, 3.35247519753738, -0.0159058638229612, 0.987309491940711, NA  
"20462", "KCNK10", 0, NA, NA, NA, NA, NA  
"20463", "AL162171.2", 0.286402220682214, 1.17253773374183, 2.71767620516714, 0.431448651429658, 0.666142181249859, NA  
"20464", "AL162171.1", 0.117958369419058, 0.451348601316665, 3.34428110054629, 0.134961322851401, 0.892642454377335, NA  
"20465", "EML5", 1.09934586840624, 3.05231432458415, 1.60401634734662, 1.90291971128182, 0.0570510225187908, NA  
"20466", "AL138478.1", 1.47796625901914, 0.298028072474815, 1.6033353294436, 0.185880063266764, 0.852538816936356, NA  
"20467", "AL357093.1", 0.102686272020481, -0.0533240139618846, 3.35247519753738, -0.0159058638229612, 0.987309491940711, NA  
"20468", "FOXN3-AS2", 1.01896589385073, 0.633289747366163, 1.67614485482416, 0.37782518947779, 0.705560459870344, NA  
"20469", "KCNK13", 0.429905162736837, -0.063078146184947, 2.47275003286523, -0.0255093096134173, 0.979648722907028, NA  
"20470", "AL161662.1", 0.269868662679755, 1.13857476503723, 3.23247437146312, 0.352230098121977, 0.724665706448339, NA  
"20471", "AL512791.2", 1.6556312573039, -0.451576204888751, 1.20835120875019, -0.373712710028915, 0.708618068170863, NA  
"20472", "AL512791.1", 0, NA, NA, NA, NA, NA  
"20473", "LINC00642", 0, NA, NA, NA, NA, NA  
"20474", "AL139193.2", 0.11921983002294, -0.0533240139618846, 3.35247519753738, -0.0159058638229612, 0.987309491940711, NA  
"20475", "LINC02321", 0.168565237602375, -1.35173207482145, 3.35247519753738, -0.40320419844251, 0.686798011343181, NA  
"20476", "GPR68", 1.11749645406784, 0.291923677298239, 1.56063269282234, 0.187054698162389, 0.851617746785961, NA  
"20477", "AL135818.1", 0.504755026076008, 0.547196022655033, 2.07770002325755, 0.263366230220812, 0.792268316436718, NA  
"20478", "AL135818.2", 0.156148522800746, 0.494635591052761, 3.34300496985029, 0.147961368742719, 0.882373255878367, NA  
"20479", "AL135818.3", 0, NA, NA, NA, NA, NA  
"20480", "CATSPERB", 1.12683515404356, 1.39097105071411, 1.50600752439916, 0.923614940947298, 0.35568683203632, NA  
"20481", "SLC24A4", 1.60623831145624, 0.105682431390352, 1.17587581706966, 0.0898755037362, 0.928386147542709, NA  
"20482", "ITPK1-

AS1",1.5768785884295,-2.15489142136003,1.20320505077563,-1.79095942123  
157,0.0732998070191883,NA  
"20483","UNC79",1.94387000603354,-2.25418202146567,1.3278412419615,-1.  
69762916697463,0.0895777743045869,NA  
"20484","AL122023.1",2.00037361708163,-0.209700207486902,1.05249509150  
865,-0.199241031315707,0.842074204435714,NA  
"20485","COX8C",0.351730868692533,1.42565098196998,2.54019003026299,0.  
561237925110027,0.574635352232741,NA  
"20486","ASB2",0.868559833872349,-1.75106694376841,1.62124852701562,-1.  
.08007311315296,0.280109623664328,NA  
"20487","PPP4R4",0.554784958553778,0.0622611564471181,1.88383882387263  
,0.0330501503940379,0.973634595232349,NA  
"20488","AL121612.2",1.91485130242171,1.70728554381233,1.2186869537968  
8,1.4009221469822,0.16123735521889,NA  
"20489","TCL6",0.741400473186543,-2.84840807583322,1.78649949433431,-1.  
.59440743468814,0.11084480830218,NA  
"20490","TCL1A",0.233061356241168,-0.774663445836492,3.35085807648355,  
-0.231183603767975,0.817172167312465,NA  
"20491","AL139020.1",0,NA,NA,NA,NA,NA  
"20492","AL355102.1",1.61084366005748,0.628649458947303,1.542496499593  
25,0.407553248330273,0.683601693610414,NA  
"20493","AL355102.5",0,NA,NA,NA,NA,NA  
"20494","AK7",0.495557659465628,0.931308836291638,1.89012798092367,0.4  
92722633435926,0.622208582992525,NA  
"20495","AL137786.1",0.268005543297635,-0.150415693622294,2.7727499960  
8506,-0.0542478383679276,0.956737707263394,NA  
"20496","LINC00618",0.102230937222884,-1.35173207482145,3.352475197537  
38,-0.403204198442509,0.686798011343181,NA  
"20497","LINC02325",0,NA,NA,NA,NA,NA  
"20498","AL110504.1",0,NA,NA,NA,NA,NA  
"20499","AL160313.1",0.487619809295311,-0.889875099459415,2.1216590031  
4198,-0.419424185574398,0.674906151574482,NA  
"20500","AL157912.1",0.269413327882159,-0.15046778595343,2.76844275514  
859,-0.0543510555432646,0.956655473192921,NA  
"20501","AL157871.5",0,NA,NA,NA,NA,NA  
"20502","AL157871.2",0,NA,NA,NA,NA,NA  
"20503","AL135838.1",0.23843966004588,0.69583062743856,3.3374714942975  
1,0.208490358233014,0.834846110249776,NA  
"20504","DLK1",33.4757246786768,22.5484160348002,3.22685401088913,6.98  
773974859408,NA,NA  
"20505","AL117190.2",0.204917209243366,-0.774663427007578,3.3524751975  
3738,-0.231072082972194,0.817258802814834,NA  
"20506","RTL1",0.102686272020481,-0.0533240139618846,3.35247519753738,  
-0.0159058638229612,0.987309491940711,NA  
"20507","AL132709.7",0,NA,NA,NA,NA,NA  
"20508","AL132709.8",0.218781522057418,-0.267643672651118,2.9408334274  
8661,-0.0910094635587233,0.927485071432953,NA  
"20509","LINC02285",0.204461874445769,-1.96013641505178,3.335489479203  
97,-0.587660799793491,0.556759992345141,NA  
"20510","AL355836.2",0.617378144382551,-2.31207378372812,2.17011535267

539,-1.06541515448832,0.286688101919066,NA  
"20511","LINC00524",0.386341321859354,-1.51636157444548,2.487738014454  
18,-0.609534269941273,0.542170364647509,NA  
"20512","LINC00239",0.310433926219371,0.171794429070976,2.653954936727  
05,0.0647314793079491,0.948387798511658,NA  
"20513","AL137779.2",0.102230937222884,-1.35173207482145,3.35247519753  
738,-0.403204198442509,0.686798011343181,NA  
"20514","AL137779.1",1.25030276353579,0.764088158840027,1.372062821044  
74,0.556890068822231,0.5776025403597,NA  
"20515","AL118558.4",1.14929496012102,0.895567524524334,1.783329246909  
5,0.502188547670795,0.615534898022819,NA  
"20516","AMN",2.3450503007967,-0.13440166252207,1.04517077393214,-0.12  
8593016446895,0.897679692494954,NA  
"20517","AL117209.1",0.23843966004588,0.69583062743856,3.3374714942975  
1,0.208490358233014,0.834846110249776,NA  
"20518","LINC00605",1.45790007624687,-0.291909639580639,1.247564490564  
2,-0.233983607090825,0.8149977050996,NA  
"20519","AL138976.2",2.0735408526008,0.237740132394917,1.0924726903423  
3,0.21761654501443,0.827727892363635,NA  
"20520","AL133367.1",1.46416809162756,1.29958622531696,1.3993386085433  
4,0.928714620880634,0.353037001545741,NA  
"20521","AL139300.2",0.42471153041685,0.690096568602204,2.878323852613  
86,0.23975640127344,0.810519107950636,NA  
"20522","AL049840.6",1.81719217294647,-0.118957717249906,1.31632634273  
304,-0.0903709918946984,0.927992407464072,NA  
"20523","AL049840.3",2.0846681154568,0.309994337928323,1.0988393701697  
3,0.282110694559878,0.777858633081905,NA  
"20524","AL132712.2",0,NA,NA,NA,NA,NA  
"20525","TDRD9",1.97648802095639,0.351300532985581,1.02908317647209,0.  
341372340951013,0.732823294588754,NA  
"20526","KIF26A",0.204461874445769,-1.96013641505178,3.33548947920397,  
-0.587660799793491,0.556759992345141,NA  
"20527","TMEM179",0,NA,NA,NA,NA,NA  
"20528","C14orf180",1.52371503415756,-2.05361626073893,1.3273181220428  
5,-1.54719221159901,0.121816903479455,NA  
"20529","LINC02280",0,NA,NA,NA,NA,NA  
"20530","AL583722.2",0.619831394764147,-0.922928826674484,1.8228653846  
4248,-0.50630662826235,0.612641410631599,NA  
"20531","LINC00638",1.1267185230426,0.310486070005983,1.42500181400265  
,0.217884684043923,0.827518960833308,NA  
"20532","AL583810.2",0.220644641439539,0.945449760607245,2.90117912387  
055,0.325884655941509,0.744511625317288,NA  
"20533","AL583810.1",0.171420620199322,0.765902268429694,3.33569101336  
987,0.22960827767316,0.818396174063793,NA  
"20534","PLD4",2.09158306677114,0.0021118699375856,1.10700886500943,0.  
00190772631036483,0.99847785555401,NA  
"20535","GPR132",1.81665906277306,-0.673221002468402,1.06458634240193,  
-0.632378019193325,0.527139893573281,NA  
"20536","LINC02298",2.27989103652381,0.506708454492189,0.9435079592234  
43,0.537047355603908,0.591234903538383,NA

"20537", "JAG2", 1.74570260492772, 0.585739108868212, 1.18080998930685, 0.49604857188924, 0.61986014220583, NA  
"20538", "AL928654.2", 0, NA, NA, NA, NA, NA  
"20539", "IGHD", 0.447405122195652, -1.80182388719477, 2.35795413158461, -0.764147132066517, 0.444779567753309, NA  
"20540", "FAM30A", 0.274106892219803, 1.20013018856317, 2.69897131421608, 0.444662076340649, 0.65656397946606, NA  
"20541", "IGHV3-7", 0.558044334741659, 0.115573280526835, 2.06255021412451, 0.0560341657310351, 0.955314589590214, NA  
"20542", "IGHV3-15", 0.380429735002095, 0.489331082173172, 2.5221590537561, 0.194012777046888, 0.846165877355487, NA  
"20543", "IGHV3-23", 0.314802175914727, 1.16511964632437, 2.6519779114781, 0.439339875826864, 0.660415284707152, NA  
"20544", "AC023310.4", 0, NA, NA, NA, NA, NA  
"20545", "AC068446.2", 0.309978591421774, -0.935659917707259, 2.67911838297866, -0.349241722072388, 0.726907846061335, NA  
"20546", "AC138649.1", 0.993739483427804, 0.480595364136518, 1.55969851649903, 0.308133500835331, 0.75798075059608, NA  
"20547", "GOLGA8S", 0.221906102043421, 0.695830468846429, 3.33747149841039, 0.208490310457437, 0.834846147549618, NA  
"20548", "MKRN3", 0.743358586428326, 1.61848121547851, 1.91089407512898, 0.846975892878452, 0.397008558577074, NA  
"20549", "AC100774.1", 0.156148522800746, 0.494635591052761, 3.34300496985029, 0.147961368742719, 0.882373255878367, NA  
"20550", "LINC02346", 0, NA, NA, NA, NA, NA  
"20551", "AC009878.1", 0.11921983002294, -0.0533240139618846, 3.35247519753738, -0.0159058638229612, 0.987309491940711, NA  
"20552", "GOLGA8M", 0.358807627193533, 0.425390970457051, 3.00844757787565, 0.141398830940385, 0.887554877766474, NA  
"20553", "GOLGA8M.1", 0.59550993522838, -1.57281664210616, 2.00629072659204, -0.783942536971102, 0.433073828749211, NA  
"20554", "AC127522.1", 0, NA, NA, NA, NA, NA  
"20555", "CHRFAM7A", 0.629032386030895, -0.546124296774074, 2.28277651475826, -0.239236864950798, 0.810921918376779, NA  
"20556", "AC026150.1", 1.22314629973056, -0.100280794590367, 1.29243120861089, -0.0775908179268975, 0.938153546594501, NA  
"20557", "GOLGA8Q", 2.08488032919254, 1.43172288254455, 1.37229785332126, 1.04330330261719, 0.296807841993721, NA  
"20558", "GOLGA8H", 0.102230937222884, -1.35173207482145, 3.35247519753738, -0.403204198442509, 0.686798011343181, NA  
"20559", "AC026150.3", 1.05694920382129, -0.18497879776747, 1.4800137422276, -0.124984513649889, 0.900535810513654, NA  
"20560", "ARHGAP11B", 0.221906102043421, 0.695830468846429, 3.33747149841039, 0.208490310457437, 0.834846147549618, NA  
"20561", "AC012236.1", 0.411257078857732, -0.433164753711976, 2.47397628280465, -0.175088482748474, 0.861010107916916, NA  
"20562", "CHRNA7", 0.203509424658842, -0.774663427007579, 3.35247519753738, -0.231072082972194, 0.817258802814834, NA  
"20563", "AC123768.2", 0.986197504958034, -1.24865259326275, 2.07049584404946, -0.603069355029781, 0.546462551903424, NA

"20564","AC123768.5",0,NA,NA,NA,NA,NA  
"20565","GREM1",1.83687611029549,-1.11453527867781,1.24492353614769,-0.895264043385867,0.370645956571512,NA  
"20566","RYR3",1.54705374090404,1.21978468151111,1.60305588677783,0.760912137606693,0.446709548367147,NA  
"20567","AC010809.3",0.648274078532611,0.388596112686621,2.26337094446911,0.171689096582341,0.86368195819405,NA  
"20568","AC010809.1",0.929874716546929,-0.0890386673209838,1.65416147838819,-0.0538270709868924,0.957072941251047,NA  
"20569","CHRM5",0.792669899287898,1.45310487947863,1.65273914432429,0.879210058325763,0.379287391760807,NA  
"20570","AC009268.2",0.795394876337467,-1.72819282139119,2.44362417556106,-0.707225292119398,0.479426483394223,NA  
"20571","AC009268.3",0,NA,NA,NA,NA,NA  
"20572","AC021231.1",0.221450767245824,-0.774663427007578,3.35247519753738,-0.231072082972194,0.817258802814834,NA  
"20573","DPH6-DT",1.120638803803,0.158831541096694,1.62397147879684,0.0978043907608328,0.922087620779635,NA  
"20574","AC087516.2",0.102686272020481,-0.0533240139618846,3.35247519753738,-0.0159058638229612,0.987309491940711,NA  
"20575","AC018563.1",0,NA,NA,NA,NA,NA  
"20576","AC078909.2",0.489893854446527,0.902427978230319,2.10103105166165,0.429516725855437,0.667547224465026,NA  
"20577","LINC02345",1.32812740409813,-1.89402696341501,1.5134648913047,-1.25145087560124,0.210770025630375,NA  
"20578","AC087473.1",1.21241590226302,-0.0605346395441338,1.46395262748968,-0.0413501355217593,0.967016764855689,NA  
"20579","AC116158.1",0.356398029464938,1.46065628384533,2.53561769326684,0.57605540761291,0.564577731032049,NA  
"20580","AC116158.2",0,NA,NA,NA,NA,NA  
"20581","LINC02694",1.15358930735137,1.2478159165984,1.54066703813528,0.809919265949035,0.417986578170721,NA  
"20582","AC022929.2",0.11921983002294,-0.0533240139618846,3.35247519753738,-0.0159058638229612,0.987309491940711,NA  
"20583","AC013652.1",1.05454513851477,-1.72177803330426,1.59690209274734,-1.07819887087886,0.280945015737248,NA  
"20584","AC087878.1",0.142120095111522,-0.0533240139618842,3.35247519753738,-0.0159058638229611,0.987309491940711,NA  
"20585","AC037198.2",0.957300220167458,0.519028451881529,1.6343683035607,0.317571290847206,0.750810154187035,NA  
"20586","FSIP1",1.56855922473331,-0.921309863134931,1.12677532661007,-0.817651790358872,0.413556045824256,NA  
"20587","AC023908.3",0.324258425605524,-1.51835431877218,2.60721371952818,-0.582366649653467,0.560319740552027,NA  
"20588","AC023908.1",1.00148523451859,-2.49850102448084,1.56403913077031,-1.59746708079503,0.110161629973008,NA  
"20589","GPR176-DT",0.854735334486196,-0.654133775956969,1.53034379914375,-0.427442367083115,0.669057154357084,NA

"20590", "AC021755.3", 0.398636435753032, -0.843822985068301, 2.21301035087041, -0.381300966231999, 0.702979936766283, NA  
"20591", "BUB1B", 0.489431372902036, -1.96699669537352, 2.30888160054858, -0.851926185780237, 0.394255062029583, NA  
"20592", "C15orf56", 1.16879743076444, -0.701249268437611, 1.42975011716375, -0.490469810087309, 0.623801487868785, NA  
"20593", "AC020658.5", 0.183715948661733, 0.576034712544328, 3.34068880739852, 0.172429922616139, 0.863099549623161, NA  
"20594", "AC091045.1", 0.100823152638361, -1.35173207482145, 3.35247519753738, -0.40320419844251, 0.686798011343181, NA  
"20595", "KNL1", 0.905108257230519, 0.676688666026005, 1.51928445028551, 0.445399586561186, 0.656031010948898, NA  
"20596", "RAD51", 2.26737313891837, -0.739571654763738, 1.08571803850695, -0.681182064342209, 0.495756295436395, NA  
"20597", "C15orf62", 0.452805427825419, -0.0446574546923177, 2.80962847640637, -0.0158944341101769, 0.987318610379366, NA  
"20598", "SPINT1-AS1", 1.11656160320673, -3.36011924352618, 1.49071289609711, -2.25403513468182, 0.024193957738178, NA  
"20599", "SPINT1", 1.94484051567774, -2.46902855782658, 1.25399699364521, -1.968927015247, 0.0489614727801018, NA  
"20600", "RHOF", 0.560028840462998, -0.163970148843905, 1.85876580344901, -0.0882145284465921, 0.929706170303633, NA  
"20601", "AC020661.1", 0.421689287938022, -1.77206589471311, 2.79843939042975, -0.633233616126657, 0.52658109648282, NA  
"20602", "DLL4", 0.221450767245824, -0.774663427007578, 3.35247519753738, -0.231072082972194, 0.817258802814834, NA  
"20603", "CHAC1", 0.3088471509732, -0.151783800255383, 2.666328088474, -0.0569261528284959, 0.954604021144224, NA  
"20604", "AC020661.3", 0.284539101300094, -0.150986859606036, 2.72667162408639, -0.0553740532128162, 0.955840466649586, NA  
"20605", "AC020661.4", 1.74984873311614, 1.57780296864217, 1.29379064169139, 1.21951954033265, 0.222647063964859, NA  
"20606", "AC087721.1", 0, NA, NA, NA, NA, NA  
"20607", "ITPKA", 1.74380714870359, -0.779079423136832, 1.02995731099559, -0.756419139725068, 0.449397936140879, NA  
"20608", "LTK", 1.03405036677157, -0.602837908742912, 1.54454238123511, -0.390301953553936, 0.696313278901506, NA  
"20609", "AC016134.1", 0.59454431085584, -0.195617110777393, 1.84284977404649, -0.10614924424787, 0.915463940557075, NA  
"20610", "AC073657.1", 0, NA, NA, NA, NA, NA  
"20611", "SPTBN5", 1.5125227226243, 0.868338123912707, 1.21494955526668, 0.714711257062939, 0.474787480380375, NA  
"20612", "AC039056.2", 1.12989975900681, -0.854077153524864, 1.42361923662966, -0.599933698245637, 0.548550423130561, NA  
"20613", "EHD4-AS1", 0, NA, NA, NA, NA, NA  
"20614", "AC036103.1", 0, NA, NA, NA, NA, NA  
"20615", "AC018362.2", 0.182454488057851, 0.814003878402388, 3.33451052748657, 0.244114952312343, 0.80714179253596, NA  
"20616", "AC090510.3", 0.270796174825259, -2.10201442494854, 3.17084321545

501,-0.662919697417743,0.507381985665671,NA  
"20617","AC090510.2",1.62422864309398,1.48568567121667,1.5847485074186  
1,0.937489869377886,0.348506632423041,NA  
"20618","AC090510.4",0.306195696679323,-0.0320258052725539,3.128238498  
98919,-0.0102376482109348,0.991831681239967,NA  
"20619","AC068724.1",0,NA,NA,NA,NA,NA  
"20620","TGM5",1.01027485486119,3.04345690973079,1.68030606818452,1.81  
125151385014,0.0701019273796162,NA  
"20621","STRC",0.393326722242743,1.64399951364785,2.14522962336261,0.7  
66351301391646,0.443467300857864,NA  
"20622","SERINC4",0.154285403418625,-0.774663427007578,3.3524751975373  
8,-0.231072082972193,0.817258802814835,NA  
"20623","FRMD5",0,NA,NA,NA,NA,NA  
"20624","AC025430.1",0.102686272020481,-0.0533240139618846,3.352475197  
53738,-0.0159058638229612,0.987309491940711,NA  
"20625","AC122108.2",0.304332577297202,-1.37410761592356,3.09443671322  
021,-0.444057430566612,0.657001062693595,NA  
"20626","DU0XA1",1.4579394675568,0.662361831238196,1.43247203123914,0.  
462390760024284,0.643801124274234,NA  
"20627","AC051619.7",0.850795471615468,0.995248398712788,1.83026160297  
089,0.543773850195675,0.58659710570942,NA  
"20628","AC051619.8",1.56551832539694,-0.137056064337592,1.45024217548  
69,-0.0945056395781463,0.924707502762448,NA  
"20629","AC051619.5",1.58774848587399,3.61545936249442,1.5934393336586  
9,2.2689658063059,0.0232704053290477,NA  
"20630","SLC28A2",0.183715948661733,0.576034712544328,3.34068880739852  
,0.172429922616139,0.863099549623161,NA  
"20631","AC025580.3",0.385063342861405,-0.0385662605686983,2.951489750  
47283,-0.0130667099767228,0.989574570521005,NA  
"20632","AC025580.1",0.102686272020481,-0.0533240139618846,3.352475197  
53738,-0.0159058638229612,0.987309491940711,NA  
"20633","AC025580.2",0.204917209243366,-0.774663427007578,3.3524751975  
3738,-0.231072082972194,0.817258802814834,NA  
"20634","AC068722.2",0.80158924126978,0.854939142956489,1.578144416335  
06,0.541736950121409,0.587999731288568,NA  
"20635","SLC24A5",0,NA,NA,NA,NA,NA  
"20636","SLC12A1",1.02974450328521,2.96064190477021,2.03155014563534,1  
.45733144275615,0.145024911431426,NA  
"20637","AC066612.1",0.982315011132687,0.915226841945136,1.73793265126  
102,0.526618129466099,0.598458799647345,NA  
"20638","AC084757.2",0,NA,NA,NA,NA,NA  
"20639","AC022306.3",1.07863073684194,0.713569228819685,1.481374301763  
52,0.481694078242215,0.630023283398397,NA  
"20640","AC025040.1",0.375307454000825,-1.51672328914404,2.50822563158  
042,-0.604699700875141,0.545378546938903,NA  
"20641","SLC27A2",0.642492705254013,1.22693492803335,1.98149229850197,  
0.6191974245678,0.535786308284764,NA  
"20642","AC022087.1",1.56769645095271,3.54299820538333,1.5497999192221  
,2.28610039363126,0.0222483859756108,NA  
"20643","AC012170.2",0.0644961186387932,-0.0533240139618838,3.35247519



753738,-0.015905863822961,0.987309491940711,NA  
"20644","USP50",0.102230937222884,-1.35173207482145,3.35247519753738,-  
0.403204198442509,0.686798011343181,NA  
"20645","AC084756.1",0.258834794821227,1.09609913055011,3.271126248508  
28,0.335083102050849,0.737562399373167,NA  
"20646","AC021752.1",1.12851691206371,-0.0300733934085094,1.2813641231  
0876,-0.0234698263094391,0.981275506969408,NA  
"20647","AC066613.1",0.203509424658842,-0.774663427007579,3.3524751975  
3738,-0.231072082972194,0.817258802814834,NA  
"20648","SCG3",0.571643831198526,0.291986585683744,2.30175751583046,0.  
126853755739078,0.899056148431781,NA  
"20649","AC090971.5",0.102686272020481,-0.0533240139618846,3.352475197  
53738,-0.0159058638229612,0.987309491940711,NA  
"20650","AC090971.1",1.99969011223007,0.0513642005989226,1.13699705731  
929,0.0451753153346101,0.963967569667136,NA  
"20651","MAPK6-  
DT",0.154285403418625,-0.774663427007578,3.35247519753738,-0.231072082  
972193,0.817258802814835,NA  
"20652","AC090970.2",0.573290570381765,-1.56657488850167,1.96902506671  
191,-0.795609418582823,0.426259090458915,NA  
"20653","AC090970.1",0.11921983002294,-0.0533240139618846,3.3524751975  
3738,-0.0159058638229612,0.987309491940711,NA  
"20654","AC023906.5",2.12221537167528,0.693567337379671,1.311460406718  
43,0.528851144744149,0.596908715235618,NA  
"20655","AC023906.3",0.467788729192236,-2.11131055286988,2.72053114788  
837,-0.776065568853583,0.437710272071175,NA  
"20656","MY05C",0.863784696623385,-0.373891576075142,1.54900038950654,  
-0.241376037480695,0.809263683087031,NA  
"20657","AC025917.1",0.347492639152484,1.36515954890128,3.017275334969  
29,0.452447787273339,0.650946427429436,NA  
"20658","AC011912.1",0.424154066098381,0.654234450987684,2.17382858437  
434,0.300959540089947,0.763445347271868,NA  
"20659","AC018926.1",0.204461874445769,-1.96013641505178,3.33548947920  
397,-0.587660799793491,0.556759992345141,NA  
"20660","AC018926.3",0.426944697626005,-0.960116038860694,2.1723840204  
7185,-0.441964233677319,0.65851508776009,NA  
"20661","AC012378.2",1.68691424409579,0.979129336159702,1.155828349914  
94,0.847123481814374,0.396926297915096,NA  
"20662","AC068726.1",0,NA,NA,NA,NA,NA  
"20663","AC084782.1",0.557761942058676,-0.327363593082975,2.0312855649  
406,-0.161160793309014,0.871966759814024,NA  
"20664","AC084782.2",0.653378783208084,1.36652796448293,2.232323563361  
14,0.612154970234421,0.540435230962102,NA  
"20665","AC084782.3",0.221906102043421,0.695830468846429,3.33747149841  
039,0.208490310457437,0.834846147549618,NA  
"20666","AC010999.2",1.661634503835,-1.03452785086251,1.06818506357752  
,-0.968491215742817,0.332799103955833,NA  
"20667","AC010999.1",0.453129276543892,0.731213883858319,2.15212217216  
387,0.339764114377909,0.734034174455244,NA  
"20668","GCOM1",1.14502165531469,-1.02007532086867,1.94421629981772,-0

.524671725550446,0.599811416008868,NA  
"20669","AC084781.1",1.09841501650788,-1.48505837431711,1.629920638064  
68,-0.91112311828901,0.362230506758922,NA  
"20670","AC018904.1",0.386926462243525,1.51070939514628,2.940633956575  
04,0.513735955394397,0.607436610092053,NA  
"20671","AC090515.2",0.70214893557452,0.284724314287336,1.659437679995  
61,0.17157879305723,0.86376868087276,NA  
"20672","AC090515.5",0,NA,NA,NA,NA,NA  
"20673","AC090515.4",0.632279129439931,-1.06165134887264,1.80926975505  
058,-0.586784444889459,0.557348485074899,NA  
"20674","CCNB2",1.65067613774074,0.66816604367013,1.19750376247634,0.5  
57965715521775,0.576867795707193,NA  
"20675","AC092757.3",1.65393797150498,0.0857585798751964,1.17930909869  
246,0.0727193404767927,0.942029457819897,NA  
"20676","LDHAL6B",0.102686272020481,-0.0533240139618846,3.352475197537  
38,-0.0159058638229612,0.987309491940711,NA  
"20677","FAM81A",1.85323442842145,-0.560063174124113,1.18452950203997,  
-0.472814879797914,0.636345257260556,NA  
"20678","FOX B1",0.102230937222884,-1.35173207482145,3.35247519753738,-  
0.403204198442509,0.686798011343181,NA  
"20679","RORA-  
AS1",1.07224623886129,0.74264898736457,1.45780561253576,0.509429364915  
656,0.610451297622777,NA  
"20680","AC107241.1",0.417488447935208,1.62697571789112,2.182440750832  
19,0.745484484410737,0.455978887347416,NA  
"20681","AC009560.1",1.4062155426079,-1.00392109201597,1.4631037452195  
2,-0.686158514251733,0.492613155334097,NA  
"20682","AC009560.4",1.28019801522367,0.222592938938281,1.602107597701  
62,0.138937571519923,0.889499481102768,NA  
"20683","AC022898.2",1.48813215521452,1.37387627488009,1.5540530616352  
,0.884060080570524,0.376663780998058,NA  
"20684","AC012404.2",0.508308322725635,1.95358301338471,2.317612111082  
56,0.842929239126292,0.399268019687969,NA  
"20685","AC107905.1",0.142120095111522,-0.0533240139618842,3.352475197  
53738,-0.0159058638229611,0.987309491940711,NA  
"20686","AC104574.2",0.832882905895008,2.66856101764389,1.638901983587  
69,1.62826150945415,0.103469447275131,NA  
"20687","AC018618.1",1.09322672858954,2.18850452086587,1.7861363719000  
9,1.22527291605273,0.220472409415632,NA  
"20688","AC009554.1",0,NA,NA,NA,NA,NA  
"20689","AC009554.2",0,NA,NA,NA,NA,NA  
"20690","AC104590.1",2.27200028294393,0.639525930972369,1.167550383674  
5,0.547750178420274,0.583863452371773,NA  
"20691","C2CD4A",1.29901830058651,-1.98740631573212,1.67423482420002,-  
1.18705350468489,0.235206516528187,NA  
"20692","C2CD4B",0.221450767245824,-0.774663427007578,3.35247519753738  
, -0.231072082972194,0.817258802814834,NA  
"20693","AC032011.1",1.22795721775897,0.410275146966828,1.265658873713  
12,0.324159341421268,0.745817402297911,NA  
"20694","AC100839.1",0.735337462145826,2.49965496545689,2.528168598180

52,0.988721625312427,0.322799359294147,NA  
"20695","AC100839.2",0.183715948661733,0.576034712544328,3.34068880739  
852,0.172429922616139,0.863099549623161,NA  
"20696","TPM1-  
AS",1.24385044532286,0.485734028963786,1.38101773975853,0.351721788199  
997,0.725046918752932,NA  
"20697","AC079328.2",0.102230937222884,-1.35173207482145,3.35247519753  
738,-0.403204198442509,0.686798011343181,NA  
"20698","LINC02568",0,NA,NA,NA,NA,NA  
"20699","AC073167.1",0.11921983002294,-0.0533240139618846,3.3524751975  
3738,-0.0159058638229612,0.987309491940711,NA  
"20700","SNX22",1.78337045322496,0.944766764815695,1.17961002049494,0.  
800914495808786,0.423181147587501,NA  
"20701","AC091231.1",0,NA,NA,NA,NA,NA  
"20702","AC100830.3",0.947530557919522,0.902357606105222,1.57974922748  
424,0.571203068440319,0.567861998486895,NA  
"20703","AC100830.2",0.62307428624366,0.781082275068242,2.307986805258  
75,0.338425797447604,0.735042336271828,NA  
"20704","AC069368.2",0.219614265997676,-1.35173207482145,3.35247519753  
738,-0.40320419844251,0.686798011343181,NA  
"20705","AC103691.2",0.848815346925997,0.890973190601633,1.76381185965  
617,0.505140718792601,0.613460003711456,NA  
"20706","AC013553.3",0.69478996527357,-0.312728600901334,2.59021118008  
157,-0.120734789235017,0.903901102720762,NA  
"20707","AC013553.4",0.386471127445929,-0.0386990368869363,2.948184401  
81732,-0.0131263963214382,0.989526951792023,NA  
"20708","IGDCC3",0.421260571274397,-2.6213330357122,2.74485792303172,-  
0.954997711800293,0.339578854113535,NA  
"20709","AC011939.3",0.183715948661733,0.576034712544328,3.34068880739  
852,0.172429922616139,0.863099549623161,NA  
"20710","MEGF11",0.0644961186387932,-0.0533240139618838,3.352475197537  
38,-0.015905863822961,0.987309491940711,NA  
"20711","LCTL",1.86353604189555,2.24885974657764,1.38382128470666,1.62  
510851034811,0.104139439859696,NA  
"20712","AC013564.1",0.414072648026779,-0.443156236512981,2.4693586609  
328,-0.179462077957351,0.857574891297832,NA  
"20713","AC093334.1",0,NA,NA,NA,NA,NA  
"20714","LINC02206",0.814326494667127,1.53547375944424,1.9253425697501  
5,0.797506783244035,0.425156764901316,NA  
"20715","AC087482.1",1.77881090800538,0.285438971591037,1.107439770045  
46,0.257746722947579,0.796602384330655,NA  
"20716","AC012568.1",0.11921983002294,-0.0533240139618846,3.3524751975  
3738,-0.0159058638229612,0.987309491940711,NA  
"20717","SKOR1",0.724636594401458,0.579934295906732,1.8008506926776,0.  
322033524636323,0.747427297240971,NA  
"20718","AC107871.2",0.306195696679323,-0.0320258052725539,3.128238498  
98919,-0.0102376482109348,0.991831681239967,NA  
"20719","NOX5",1.64030374888724,1.1749858381891,1.44786915806556,0.811  
527638145803,0.417062727689977,NA  
"20720","AC027088.5",0.167182390659274,0.576034712544328,3.34068880739

852,0.172429922616139,0.863099549623161,NA  
"20721","EWSAT1",0.94106886805942,2.83606544001181,1.57872623940366,1.79642636527224,0.0724267338428908,NA  
"20722","AC027088.2",0,NA,NA,NA,NA,NA  
"20723","AC027237.2",0.732854893090939,0.617785306160344,1.80230058084159,0.342775956867233,0.731767014994602,NA  
"20724","DRAIC",0.807383066444189,1.65700006848929,1.95338245501114,0.848272218396597,0.396286385828247,NA  
"20725","LINC02204",0.376337829442688,0.498741423931096,2.21785614790155,0.224875461108236,0.82207615960145,NA  
"20726","SALRNA2",0.206616213750315,0.576034718369261,3.3406888072366,0.172429924368129,0.863099548245903,NA  
"20727","AC009269.2",0.246950606696644,1.09770941200628,3.29958282364932,0.332681272353157,0.739374887572934,NA  
"20728","AC009269.5",0.523580420124212,2.02462726630625,2.0015912973338,1.01150882750296,0.311772958273632,NA  
"20729","NR2E3",1.36677944590532,0.791063216511067,1.61415398957924,0.490079150823319,0.6240778908401,NA  
"20730","AC009690.2",0.102686272020481,-0.0533240139618846,3.35247519753738,-0.0159058638229612,0.987309491940711,NA  
"20731","HEXA-AS1",0.785433092409982,-0.530896790185685,1.54297534767732,-0.344073410495415,0.730791078805899,NA  
"20732","AC079322.1",1.78721496979701,2.21347855974898,1.30536702492606,1.69567525261667,0.0899473976819642,NA  
"20733","AC100827.4",0.100823152638361,-1.35173207482145,3.35247519753738,-0.40320419844251,0.686798011343181,NA  
"20734","ADPGK-AS1",0.541055441941604,-0.825707680725312,1.86232180275698,-0.443375403489845,0.657494223776811,NA  
"20735","INSYN1-AS1",0.394588182846626,1.58555090478059,2.48513843699939,0.63801311072836,0.523465145618432,NA  
"20736","AC013486.1",0,NA,NA,NA,NA,NA  
"20737","ISLR2",1.93339046716279,0.90839179564758,1.11546111888361,0.814364373862466,0.415436241583562,NA  
"20738","AC010931.2",0.304332577297202,-1.37410761592356,3.09443671322021,-0.444057430566612,0.657001062693595,NA  
"20739","AC090826.1",0.397950230362148,-0.46706514439947,2.92820789851617,-0.159505458828982,0.873270657855777,NA  
"20740","SEMA7A",2.02572856059067,-0.0549317138225483,1.05466541114177,-0.0520844935675663,0.95846136853537,NA  
"20741","AC100835.2",0.360155062448918,-1.78089833603962,2.94296306436511,-0.605137848178811,0.545087408047316,NA  
"20742","SCAMP5",2.08876512430081,-0.216364653158852,1.06360673491363,-0.203425426011826,0.838802528180475,NA  
"20743","AC105137.2",0.0534622507802646,-0.0533240139618838,3.35247519753738,-0.015905863822961,0.987309491940711,NA  
"20744","AC105020.3",0.205372544040962,0.695830627438559,3.33747149429751,0.208490358233014,0.834846110249776,NA

"20745","AC105020.6",0.856459276634569,0.992348714878268,1.47473938686  
284,0.672897681935016,0.501012387033782,NA  
"20746","AC105020.5",0.387346759659794,-0.990622673409685,2.2288991101  
3911,-0.444444824309637,0.656721011979128,NA  
"20747","DNM1P35",1.05494213684161,1.3671167509246,1.72364284134566,0.  
793155471731767,0.427687247039479,NA  
"20748","AC019294.2",0.270796174825259,-2.10201442494854,3.17084321545  
501,-0.662919697417743,0.507381985665671,NA  
"20749","NRG4",1.06903072989514,1.95930931063229,1.54456147383813,1.26  
852141777402,0.204611807110694,NA  
"20750","TMEM266",0.646437577284462,-0.181317504182522,2.0407709105801  
7,-0.0888475542465345,0.929203064276374,NA  
"20751","AC091100.1",0,NA,NA,NA,NA,NA  
"20752","ISL2",0.195582345891787,0.494635591052761,3.34300496985029,0.  
147961368742719,0.882373255878367,NA  
"20753","AC090181.2",1.42503764183873,-1.85620984679717,1.341547091993  
57,-1.38363375976523,0.166470625635526,NA  
"20754","AC046168.2",0.591833571746985,-0.505198828696658,2.0094219309  
5595,-0.251415006930037,0.80149326639764,NA  
"20755","AC104758.2",0.167182390659274,0.576034712544328,3.34068880739  
852,0.172429922616139,0.863099549623161,NA  
"20756","AC090260.1",0.359657947459587,0.367118670205437,2.58028016787  
908,0.14227860787195,0.886859943060388,NA  
"20757","ACSBG1",0.614751627730097,-0.474867856542245,2.63032610749517  
,-0.180535734785546,0.856732002956813,NA  
"20758","AC090607.4",0,NA,NA,NA,NA,NA  
"20759","CRABP1",0.244806367132003,0.695807100884759,3.33664907448574,  
0.208534696143316,0.834811494458112,NA  
"20760","CHRNA5",1.47338376671207,-1.25583327407775,1.2223497191845,-1  
.027392778325,0.304235550640796,NA  
"20761","RASGRF1",0.917487367926182,-2.16174300779289,1.84859715491449  
,-1.16939648102665,0.242243926977124,NA  
"20762","AC011944.1",0.367431897323466,1.50566789164441,2.924126155225  
86,0.514912083718944,0.606614456484223,NA  
"20763","MINAR1",2.06651313021891,0.627980728813459,1.14136570527467,0  
.550201154556623,0.58218141177126,NA  
"20764","AC021483.2",0.160386752340794,0.715986771710925,3.33695183420  
161,0.214563112470645,0.830107956063492,NA  
"20765","AC016705.2",0.219614265997676,-1.35173207482145,3.35247519753  
738,-0.40320419844251,0.686798011343181,NA  
"20766","CEMIP",2.25921788063882,1.32978775044317,1.37003622360963,0.9  
70622329196219,0.331736382467499,NA  
"20767","AC027808.2",0.655884455328087,0.355537551672824,2.02982411192  
565,0.1751568274236,0.860956406556805,NA  
"20768","AC103858.1",1.50040766390643,1.42954064145777,1.2834313852736  
7,1.1138426704073,0.26534668757049,NA  
"20769","AC109809.1",0.88510148696592,2.78184754154076,1.7374515096030  
8,1.60110801721094,0.109352996817284,NA  
"20770","AC023034.1",1.68233162993603,0.476861638172373,1.113328381845  
78,0.428320741614247,0.668417619974388,NA

"20771", "CPEB1-  
AS1", 1.51999797597987, 1.71592412084127, 1.37259787719899, 1.250128788150  
9, 0.211252505044556, NA  
"20772", "FSD2", 0.626388078483912, 1.16834520488461, 1.77482769016944, 0.6  
5828655443902, 0.510354016094072, NA  
"20773", "AC024270.4", 0.568813386243001, 0.23002448993438, 2.031371438312  
81, 0.113236055994482, 0.90984341093962, NA  
"20774", "AC022558.3", 0, NA, NA, NA, NA, NA  
"20775", "AC024270.5", 1.91914950158158, 0.906747476204582, 1.200565747514  
86, 0.755266821564354, 0.450088901922352, NA  
"20776", "AC103876.1", 0.203509424658842, -0.774663427007579, 3.3524751975  
3738, -0.231072082972194, 0.817258802814834, NA  
"20777", "SH3GL3", 0.701468812416369, 0.276012563539361, 1.77705308890373,  
0.155320381401568, 0.876568748561094, NA  
"20778", "AC048382.1", 0.290640450222262, 1.25033941279685, 2.654597837409  
76, 0.471008977396319, 0.637634324027243, NA  
"20779", "AC115102.1", 0.168565237602375, -1.35173207482145, 3.35247519753  
738, -0.40320419844251, 0.686798011343181, NA  
"20780", "AC012291.2", 0.100823152638361, -1.35173207482145, 3.35247519753  
738, -0.40320419844251, 0.686798011343181, NA  
"20781", "AC087286.3", 0.417033113137611, 0.413097229319217, 2.22161725051  
422, 0.185944374182187, 0.852488383400628, NA  
"20782", "AC087286.1", 1.97297250929576, 0.335181886186064, 1.108051864652  
32, 0.302496567966371, 0.762273549355612, NA  
"20783", "AC087286.4", 0.973400445197376, -0.017615089828752, 1.4409790230  
5089, -0.0122243901867889, 0.990246590723285, NA  
"20784", "AC021739.4", 0.6863267351731, 1.03389303224081, 2.0156558821194,  
0.512931319979928, 0.607999363867812, NA  
"20785", "AC021739.5", 0.304332577297202, -1.37410761592356, 3.09443671322  
021, -0.444057430566612, 0.657001062693595, NA  
"20786", "AC021739.3", 0.50364116195323, 1.93465215488478, 2.3507559798539  
, 0.822991485064741, 0.410512835626712, NA  
"20787", "NTRK3", 0.531329974153436, 0.732454996938886, 1.90378045321394, 0  
.384737113831779, 0.700432194974134, NA  
"20788", "AC013565.1", 0.0644961186387932, -0.0533240139618838, 3.35247519  
753738, -0.015905863822961, 0.987309491940711, NA  
"20789", "AC013565.3", 0.37929829455352, 1.51127673565187, 2.2140795024112  
8, 0.68257564103095, 0.494875030680926, NA  
"20790", "MIR9-3HG", 1.1510284884853, 0.0883361521147452, 1.4072473705741,  
0.0627722985751308, 0.94994782488764, NA  
"20791", "TICRR", 0.539257052920491, -0.330753485954016, 2.09390857797636,  
-0.157959850507738, 0.874488436104351, NA  
"20792", "TTLL13P", 0.632734464237528, -0.106092085086387, 1.9915819862944  
9, -0.0532702574217296, 0.957516577681295, NA  
"20793", "AC091167.5", 0.102686272020481, -0.0533240139618846, 3.352475197  
53738, -0.0159058638229612, 0.987309491940711, NA  
"20794", "AC018946.1", 0.102686272020481, -0.0533240139618846, 3.352475197  
53738, -0.0159058638229612, 0.987309491940711, NA  
"20795", "AC103739.2", 0.269868662679755, 1.13857476503723, 3.232474371463  
12, 0.352230098121977, 0.724665706448339, NA

"20796", "CRTC3-  
AS1", 0.692056746099657, -3.36118308835324, 1.81241960240257, -1.854528103  
70049, 0.0636636432988712, NA  
"20797", "AC103739.3", 0.752641564165513, 1.57224728639734, 1.751698665268  
27, 0.897555794024965, 0.36942241542939, NA  
"20798", "AC021422.1", 0.220644641439539, 0.945449760607245, 2.90117912387  
055, 0.325884655941509, 0.744511625317288, NA  
"20799", "LINC01585", 2.33840774239031, 0.820120751630479, 1.0114208037569  
6, 0.810860077807487, 0.417446028729366, NA  
"20800", "BLM", 1.0032465325185, 1.25078290052202, 1.52180583256438, 0.8219  
07022405313, 0.411129815956229, NA  
"20801", "AC124248.2", 0, NA, NA, NA, NA, NA  
"20802", "AC124248.1", 0.165319271277154, -0.774663427007578, 3.3524751975  
3738, -0.231072082972193, 0.817258802814835, NA  
"20803", "AC068831.4", 0.142120095111522, -0.0533240139618842, 3.352475197  
53738, -0.0159058638229611, 0.987309491940711, NA  
"20804", "AC068831.1", 0.696072524293775, 0.510155120761628, 1.68625937200  
193, 0.302536566575741, 0.762243062513075, NA  
"20805", "PRC1-  
AS1", 1.12552864903448, -0.795195820688884, 1.53399430654025, -0.518382511  
133538, 0.604191414364164, NA  
"20806", "AC068831.6", 0.0644961186387932, -0.0533240139618838, 3.35247519  
753738, -0.015905863822961, 0.987309491940711, NA  
"20807", "SV2B", 1.10626162360368, -2.01750693325253, 1.63415147553651, -1.  
23458991620723, 0.216983163779608, NA  
"20808", "AC104035.1", 0.0644961186387932, -0.0533240139618838, 3.35247519  
753738, -0.015905863822961, 0.987309491940711, NA  
"20809", "AC116903.2", 0.483246027177883, 1.83418929073065, 2.395183061582  
92, 0.765782507462489, 0.44380572419757, NA  
"20810", "ST8SIA2", 1.42712809110507, 2.62113636792095, 1.50948140438589, 1.  
.73644826647422, 0.0824846042147957, NA  
"20811", "LINC00930", 0.0534622507802646, -0.0533240139618838, 3.352475197  
53738, -0.015905863822961, 0.987309491940711, NA  
"20812", "AC091544.4", 0.443356869289245, 0.631510007619988, 2.47802647528  
698, 0.254843930812666, 0.798843643306955, NA  
"20813", "AC106028.3", 0.662861436464121, 0.304331470215768, 1.75626735343  
584, 0.173283110695189, 0.862428898581399, NA  
"20814", "AC106028.2", 0.306195696679323, -0.0320258052725539, 3.128238498  
98919, -0.0102376482109348, 0.991831681239967, NA  
"20815", "AC106028.4", 0.454967458284589, 0.427768721310666, 2.16893863245  
554, 0.197224907569825, 0.843651539980978, NA  
"20816", "AC108457.1", 0.102686272020481, -0.0533240139618846, 3.352475197  
53738, -0.0159058638229612, 0.987309491940711, NA  
"20817", "AC091078.1", 0.992049306160298, 0.100609226604346, 1.44454039977  
456, 0.0696479147416351, 0.944473899058399, NA  
"20818", "AC110023.1", 0.51303268128302, -1.68743474741591, 2.269700758590  
5, -0.743461331203775, 0.457202424420121, NA  
"20819", "LINC02207", 1.56774376356651, -0.236977518784086, 1.149767044004  
49, -0.206109159259534, 0.836705644321866, NA  
"20820", "AC103996.2", 0, NA, NA, NA, NA, NA

"20821", "LINC01197", 2.15677353035932, 2.42122695531913, 1.26189808583031, 1.91871830420124, 0.0550199937258129, NA  
"20822", "LINC00924", 1.34990515523026, 1.2692897925642, 1.42303131480983, 0.891961954283365, 0.372413325199419, NA  
"20823", "AC012409.3", 1.65210594485863, 1.39131978920517, 1.20861214213238, 1.15117144756666, 0.249661709151675, NA  
"20824", "AC012409.4", 0, NA, NA, NA, NA, NA  
"20825", "AC103746.1", 1.04130226400469, 0.236895406185617, 1.57851170743205, 0.150075165784486, 0.880705312897142, NA  
"20826", "AC020704.1", 0.44038871302379, 1.70132954246371, 2.43231697232975, 0.699468680200066, 0.48425917953765, NA  
"20827", "LINC00923", 1.23003381537341, 1.09073966283613, 1.76357257048135, 0.618483004948542, 0.536256997257275, NA  
"20828", "AC015722.2", 1.64672073310293, 1.65068923138551, 1.85462140374272, 0.890041076876571, 0.373443830051329, NA  
"20829", "LINC02351", 0.797061472299855, -0.928668172960288, 1.96515928942382, -0.472566360375078, 0.636522587089164, NA  
"20830", "FAM169B", 1.40395587253504, -0.870425324163468, 1.32159342650427, -0.658618079287682, 0.510141050274137, NA  
"20831", "AC118658.1", 0.953746923517831, -0.492811046620946, 1.46745581976877, -0.335826837157251, 0.737001451187699, NA  
"20832", "AC036108.2", 0.37379860440959, 1.51493741483916, 2.51101047483098, 0.603317839580552, 0.546297267431531, NA  
"20833", "AC036108.3", 1.05467347817753, -0.521374055754134, 1.4735463261329, -0.353822643039938, 0.723471803105025, NA  
"20834", "LINC02244", 0.307603481263847, -0.0321837065735757, 3.12361882183901, -0.0103033399429408, 0.99177926958558, NA  
"20835", "AC015660.1", 0.729880476310678, 0.359564106595399, 1.659976359404, 0.216607968275221, 0.828513875382657, NA  
"20836", "AC084855.1", 0.572596280985453, -0.491293656919355, 2.29508109610133, -0.214063746049724, 0.830497346935387, NA  
"20837", "AC084855.2", 0.49301843443253, 1.89422693435595, 2.0765801162335, 0.912185819149468, 0.361670907660147, NA  
"20838", "AC022710.1", 0, NA, NA, NA, NA, NA  
"20839", "AC027020.1", 0.209155438783414, -0.335374473295219, 3.34626863491525, -0.10022341595528, 0.920166956363588, NA  
"20840", "AC015712.7", 0.662138391346664, 0.446415415051615, 1.69024251453518, 0.264113232990345, 0.791692667381787, NA  
"20841", "AC090907.2", 0.102686272020481, -0.0533240139618846, 3.35247519753738, -0.0159058638229612, 0.987309491940711, NA  
"20842", "AC090907.3", 0.102686272020481, -0.0533240139618846, 3.35247519753738, -0.0159058638229612, 0.987309491940711, NA  
"20843", "AC023024.1", 1.02753594135164, -0.362735403263934, 1.65888044962734, -0.21866277545523, 0.826912748126805, NA  
"20844", "PCSK6-AS1", 0.102686272020481, -0.0533240139618846, 3.35247519753738, -0.0159058638229612, 0.987309491940711, NA  
"20845", "AC090164.5", 0.863811314757357, -0.194751779855586, 1.57428189319858, -0.123708327394845, 0.901546218005308, NA  
"20846", "WASIR2", 0.507168248460972, 0.78592719454993, 2.03465195733169, 0



.386271072906553,0.699295921660096,NA  
"20847","Z69720.1",1.57006221774623,0.620504650727644,1.23404628044825  
,0.50282121550762,0.615089976195876,NA  
"20848","Z69666.1",0.811080528341906,1.68110019412925,1.75053997760253  
,0.960332363521125,0.336887966821459,NA  
"20849","HBA2",160.427355873309,-3.35268933428043,2.23590079628513,-1.  
49948036149493,NA,NA  
"20850","HBA1",65.7655106331225,-4.02955811284736,2.09002161476139,-1.  
92799829647092,NA,NA  
"20851","HBQ1",0,NA,NA,NA,NA,NA  
"20852","ARHGDIG",0.244806367132003,0.695807100884759,3.33664907448574  
,0.208534696143316,0.834811494458112,NA  
"20853","PDIA2",0.168565237602375,-1.35173207482145,3.35247519753738,-  
0.40320419844251,0.686798011343181,NA  
"20854","LINC00235",0.806944035471926,0.236292627246971,1.700587747313  
14,0.138947624208339,0.889491537267202,NA  
"20855","WFIKN1",1.83876056337098,-0.0583419494985133,1.1388475829520  
2,-0.0512289356116332,0.959143094826746,NA  
"20856","AL022341.1",0.993887487900995,-0.243425001483973,1.4804437839  
9897,-0.16442704823714,0.869394971932065,NA  
"20857","AL022341.2",0.166727055861678,-0.774663427007578,3.3524751975  
3738,-0.231072082972193,0.817258802814835,NA  
"20858","FBXL16",0.142120095111522,-0.0533240139618842,3.3524751975373  
8,-0.0159058638229611,0.987309491940711,NA  
"20859","CCDC78",0.595350436662126,-1.47909214852751,1.83650127489048,  
-0.805385854477947,0.420597052031731,NA  
"20860","MSLN",0.303877242499606,-2.34617912601169,3.02976049563007,-0  
.774377753421653,0.438707435439005,NA  
"20861","AL023882.1",1.07943686264823,0.0767748308060487,1.48069451076  
658,0.0518505540797212,0.958647773365807,NA  
"20862","AC009041.4",0.464540338976349,-0.393020442929102,2.1405885732  
0128,-0.183603915226612,0.854324191433792,NA  
"20863","AC009041.1",0,NA,NA,NA,NA,NA  
"20864","CACNA1H",0.155693188003149,-0.774663427007578,3.3524751975373  
8,-0.231072082972193,0.817258802814835,NA  
"20865","TPSG1",0.221450767245824,-0.774663427007578,3.35247519753738,  
-0.231072082972194,0.817258802814834,NA  
"20866","TPSD1",0.609628590353326,-0.540714480203224,2.28518799054841,  
-0.236617067147049,0.812953878484788,NA  
"20867","AC120498.9",0.155693188003149,-0.774663427007578,3.3524751975  
3738,-0.231072082972193,0.817258802814835,NA  
"20868","AL031714.1",1.47642698835549,0.116046641544734,1.313812766159  
35,0.0883281427413522,0.929615871693828,NA  
"20869","BAIAP3",1.40850162625991,-1.07619402588854,1.46016767735713,-  
0.737034549235076,0.461101339401233,NA  
"20870","AL031709.1",0.0644961186387932,-0.0533240139618838,3.35247519  
753738,-0.015905863822961,0.987309491940711,NA  
"20871","CCDC154",1.15979520968508,0.407319928971657,1.5882781519493,0  
.256453775726722,0.797600468760727,NA  
"20872","AL031600.3",0.628014281765911,-1.50211747845508,1.95221793630

295,-0.769441490379781,0.441631265964846,NA  
"20873","AL031705.1",0.760139926268943,0.310325947341624,1.78373007806  
526,0.1739758448645,0.861884445722525,NA  
"20874","AL133297.1",0.475617859487878,1.86295532285868,2.373207500303  
99,0.784994705528296,0.432456672811894,NA  
"20875","AL031710.2",0.155693188003149,-0.774663427007578,3.3524751975  
3738,-0.231072082972193,0.817258802814835,NA  
"20876","AL031717.1",0.579565592112241,2.1339260975772,2.6592349812552  
9,0.802458644166106,0.422287701721842,NA  
"20877","IGFALS",0.394709569185844,0.174908154643343,2.47654543257427,  
0.0706258614692698,0.943695527326942,NA  
"20878","RNF151",0.0534622507802646,-0.0533240139618838,3.352475197537  
38,-0.015905863822961,0.987309491940711,NA  
"20879","AC005363.2",0.102686272020481,-0.0533240139618846,3.352475197  
53738,-0.0159058638229612,0.987309491940711,NA  
"20880","NOX01",0,NA,NA,NA,NA,NA  
"20881","SYNGR3",0.49495600068739,-0.211707355424753,2.14088090216778,  
-0.098887964860813,0.921227224716588,NA  
"20882","NPW",0.439803572639618,-0.994151356944318,2.17011269879785,-0  
.458110473937615,0.646873074401426,NA  
"20883","AC009065.2",0,NA,NA,NA,NA,NA  
"20884","AC009065.5",0.167182390659274,0.576034712544328,3.34068880739  
852,0.172429922616139,0.863099549623161,NA  
"20885","AC009065.3",0.102686272020481,-0.0533240139618846,3.352475197  
53738,-0.0159058638229612,0.987309491940711,NA  
"20886","RAB26",0.249044596672051,0.88628321168114,3.27462607355989,0.  
270651729929472,0.786658905412859,NA  
"20887","CASKIN1",2.1019392200568,1.18277387061665,1.08710615206569,1.  
08800218669462,0.276594142192628,NA  
"20888","AC009065.1",0.102686272020481,-0.0533240139618846,3.352475197  
53738,-0.0159058638229612,0.987309491940711,NA  
"20889","DNASE1L2",1.27397741754946,0.720730023106686,1.37590194130208  
,0.52382368355744,0.60040117912157,NA  
"20890","AC009065.8",0.219614265997676,-1.35173207482145,3.35247519753  
738,-0.40320419844251,0.686798011343181,NA  
"20891","AC106820.3",1.33187929005211,0.808425843400938,1.454280157900  
27,0.555894157676034,0.578283212376347,NA  
"20892","TEDC2",1.16795019642977,2.36994770618321,1.555221071969,1.523  
8654805408,0.127542318112367,NA  
"20893","AC106820.4",2.2252249180349,-0.73657139860318,0.959175624416  
085,-0.767921306436014,0.442533938353193,NA  
"20894","CEMP1",0,NA,NA,NA,NA,NA  
"20895","AC141586.3",1.00583034486217,2.04287096725175,1.6611001713284  
8,1.22983008641673,0.218760739182066,NA  
"20896","AC092117.1",1.65358603872872,-0.146247319208591,1.13429802836  
47,-0.128932005126936,0.897411451592859,NA  
"20897","PRSS21",0.368373361138399,-1.79010721085739,2.48996923539497,  
-0.718927441114921,0.472185627692503,NA  
"20898","ZG16B",0.102230937222884,-1.35173207482145,3.35247519753738,-  
0.403204198442509,0.686798011343181,NA

"20899", "AC003965.1", 0.868049544297405, -0.0937724710164449, 1.54601449048033, -0.0606543286585308, 0.951634505120869, NA  
"20900", "PKMYT1", 0.442901534491649, -0.655536548941946, 2.83097398126541, -0.231558662594606, 0.816880817332199, NA  
"20901", "AC004233.2", 0, NA, NA, NA, NA, NA  
"20902", "BICDL2", 0, NA, NA, NA, NA, NA  
"20903", "MMP25", 1.82139721442128, 0.288625481618269, 1.22360316130519, 0.235881608307059, 0.813524540049595, NA  
"20904", "MEFV", 0.102230937222884, -1.35173207482145, 3.35247519753738, -0.403204198442509, 0.686798011343181, NA  
"20905", "AC004232.1", 0, NA, NA, NA, NA, NA  
"20906", "OR2C1", 0, NA, NA, NA, NA, NA  
"20907", "MTRNR2L4", 0.102230937222884, -1.35173207482145, 3.35247519753738, -0.403204198442509, 0.686798011343181, NA  
"20908", "AC006111.2", 0.117958369419058, 0.451348601316665, 3.34428110054629, 0.134961322851401, 0.892642454377335, NA  
"20909", "AC006111.3", 0.11921983002294, -0.0533240139618846, 3.35247519753738, -0.0159058638229612, 0.987309491940711, NA  
"20910", "SRL", 0.165319271277154, -0.774663427007578, 3.35247519753738, -0.231072082972193, 0.817258802814835, NA  
"20911", "AC012676.1", 1.15596349339225, 0.30825513298107, 1.62266983298985, 0.189967870674648, 0.849334307530298, NA  
"20912", "AC012676.3", 0.385508577919096, -0.496844509190611, 2.24022373030784, -0.221783432819157, 0.824482476998262, NA  
"20913", "AC012676.4", 0.204461874445769, -1.96013641505178, 3.33548947920397, -0.587660799793491, 0.556759992345141, NA  
"20914", "AC023830.3", 0, NA, NA, NA, NA, NA  
"20915", "C16orf71", 0.479374892471858, -1.25516923542787, 2.37332265359243, -0.528865821732227, 0.596898533007798, NA  
"20916", "AC012173.1", 0.142120095111522, -0.0533240139618842, 3.35247519753738, -0.0159058638229611, 0.987309491940711, NA  
"20917", "AC022167.1", 0.915850905166621, -0.0868214684532207, 1.71151640881506, -0.050727803721923, 0.959542420999769, NA  
"20918", "AC022167.4", 0.450690901948773, -0.433176354918524, 2.409787589149, -0.179757069406892, 0.857343288178163, NA  
"20919", "AC022167.3", 0.102686272020481, -0.0533240139618846, 3.35247519753738, -0.0159058638229612, 0.987309491940711, NA  
"20920", "LINC02177", 0.221906102043421, 0.695830468846429, 3.33747149841039, 0.208490310457437, 0.834846147549618, NA  
"20921", "AC012178.1", 0.102686272020481, -0.0533240139618846, 3.35247519753738, -0.0159058638229612, 0.987309491940711, NA  
"20922", "TEKT5", 0.270796174825259, -2.10201442494854, 3.17084321545501, -0.662919697417743, 0.507381985665671, NA  
"20923", "AC007014.2", 1.59153723719476, -0.349652052261474, 1.24166746733065, -0.281598786680913, 0.778251170660724, NA  
"20924", "AC007014.1", 0.370691815318116, 0.409327796421713, 2.565354855683, 0.159559912545796, 0.873227759460615, NA  
"20925", "AC007220.1", 0.405166715907558, 0.502244490776096, 2.51729893510197, 0.199517222119569, 0.841858172862038, NA  
"20926", "AC099489.1", 0.554784958553778, 0.0622611564471181, 1.8838388238

7263,0.0330501503940379,0.973634595232349,NA  
"20927","AC099489.3",0,NA,NA,NA,NA,NA  
"20928","AC007613.1",1.86405295242821,-0.297751832926056,1.04070211957  
395,-0.286106684444873,0.774796412015075,NA  
"20929","AC007216.4",1.03627680079295,-1.13109374309307,1.486485881755  
68,-0.760917918545679,0.446706095244519,NA  
"20930","AC007216.2",0.436431603666262,0.649959198363038,2.45625588652  
257,0.264613797743693,0.791306989865124,NA  
"20931","TNFRSF17",0.455531004835792,0.375823278914016,2.3698305173191  
5,0.158586563962035,0.873994615228067,NA  
"20932","AC007216.1",1.91978671792171,-0.0750102424797574,1.0688243896  
541,-0.0701801373601071,0.944050283429832,NA  
"20933","AC007601.1",0.324592374063902,1.32629053141379,3.073475522149  
63,0.431527930466861,0.666084548480396,NA  
"20934","AC007598.2",0,NA,NA,NA,NA,NA  
"20935","AC007598.1",0.203509424658842,-0.774663427007579,3.3524751975  
3738,-0.231072082972194,0.817258802814834,NA  
"20936","AC131391.1",0.20961077358101,0.88584532733971,3.3328088314830  
8,0.265795421258984,0.790396769724465,NA  
"20937","AC109597.2",0.554906559461729,-2.21558237946157,2.03003913575  
79,-1.09139885061103,0.275097417958453,NA  
"20938","SHISA9",0.664670139793871,0.967306483793899,2.01858068738435,  
0.479201297148702,0.631795431540147,NA  
"20939","LINC02130",0.706300266346018,1.51542600645403,1.9511278232579  
8,0.77669232553077,0.437340315768908,NA  
"20940","AC040173.1",0.694236023045626,0.0481753832067393,1.8174918849  
9513,0.0265065190136287,0.978853334006294,NA  
"20941","NPIPA3",2.04777478729836,1.41559785027679,1.38263158794406,1.  
02384312829258,0.30590937592728,NA  
"20942","NPIPA2",1.6803256719379,2.85506295968009,1.77806939937384,1.6  
0570951881041,0.108337748855977,NA  
"20943","AC026401.2",1.00814532025969,-0.625456015919038,1.54908345527  
635,-0.403758760568171,0.686390124894319,NA  
"20944","ABCC6",0.787004235494176,0.832775167785701,1.88824266450626,0  
.441031856466106,0.659189934641077,NA  
"20945","NPIPA7",0,NA,NA,NA,NA,NA  
"20946","AC109446.3",0.11921983002294,-0.0533240139618846,3.3524751975  
3738,-0.0159058638229612,0.987309491940711,NA  
"20947","AC009152.3",0.242943247749883,-0.774663951729422,3.3071134315  
1841,-0.234241724020258,0.814797324817481,NA  
"20948","NPIPA8",0,NA,NA,NA,NA,NA  
"20949","AC126755.2",0.673172259205193,0.489064374478434,1.80902079207  
076,0.270347569592392,0.786892872066757,NA  
"20950","AC092287.1",0.940415137380825,-1.50506399835345,1.50750177347  
435,-0.998382903978093,0.318093720408048,NA  
"20951","TMC7",0,NA,NA,NA,NA,NA  
"20952","AC099518.4",0.484961335510167,1.95898842504001,2.281145767433  
87,0.858773890299758,0.390465275212624,NA  
"20953","AC099518.1",0,NA,NA,NA,NA,NA  
"20954","AC099518.6",1.01627885776779,0.683345884424632,1.457349663741

71,0.468896313236288,0.639143751684666,NA  
"20955","SYT17",1.65643108630872,-0.440554428060739,1.07670186005884,-  
0.409170304615861,0.682414685112245,NA  
"20956","AC130456.5",0.762970371224468,0.404060967120469,1.72743562535  
697,0.233907973871368,0.815056422665346,NA  
"20957","AC002550.2",1.48574768546891,0.275656323766917,1.247414257479  
89,0.220982181431705,0.825106307180894,NA  
"20958","AC002550.1",0.462344219480069,0.7678249073774,2.4377512565391  
1,0.314972622952305,0.752782440400613,NA  
"20959","AC027130.1",0,NA,NA,NA,NA,NA  
"20960","ACSM3",2.00298509352902,-0.339642396175794,1.18242568179442,-  
0.287242066376941,0.773926978492034,NA  
"20961","ACSM1",0.274913018026089,-0.226100793799534,2.74072232109206,  
-0.0824967900102491,0.934251670836265,NA  
"20962","AC004381.1",0,NA,NA,NA,NA,NA  
"20963","DNAH3",0,NA,NA,NA,NA,NA  
"20964","AC008551.1",0.350898339321007,1.45361411466565,2.545769154203  
14,0.570992115394946,0.568004987527943,NA  
"20965","NPIPB3",0.681857420471033,2.38707472662785,2.17143261296708,1  
.09930868329647,0.271633446122775,NA  
"20966","OTOA",0.966446031002444,-1.01308844215955,1.65615744481455,-0  
.611710224369997,0.540729496019875,NA  
"20967","AC092119.2",0,NA,NA,NA,NA,NA  
"20968","AC092119.3",1.00961323960462,1.24375648781119,1.4326187721049  
7,0.86816989420271,0.385301332706659,NA  
"20969","AC009034.1",1.35611991234374,1.1473190916123,1.84865016052584  
,0.620625316845209,0.534846178207884,NA  
"20970","AC092338.2",0.47655932330281,-1.26618999946688,2.090649977956  
47,-0.605644183778925,0.544751055724551,NA  
"20971","AC009021.1",0.739197548767728,-0.332215511788299,1.7323203887  
0307,-0.191774866794137,0.847918558925282,NA  
"20972","HS3ST2",0.403292610553443,-2.66819139654035,3.30268191986861,  
-0.807886275844117,0.419156052561062,NA  
"20973","SCNN1B",0.168565237602375,-1.35173207482145,3.35247519753738,  
-0.40320419844251,0.686798011343181,NA  
"20974","AC008915.1",1.46571213833778,0.644364364229396,1.148119932412  
27,0.561234367628779,0.57463777707972,NA  
"20975","AC008870.1",0.274106892219803,1.20013018856317,2.698971314216  
08,0.444662076340649,0.65656397946606,NA  
"20976","ERN2",0.785156748274033,-1.14217555736013,1.87958251681834,-0  
.60767513378106,0.543402958367951,NA  
"20977","LINC01567",0,NA,NA,NA,NA,NA  
"20978","AC008731.1",0.989908141441364,-1.4380946445028,1.632142007885  
89,-0.881108774576277,0.378258948445636,NA  
"20979","LCMT1-  
AS1",0.783464113430162,-0.525830159420556,1.71394807218311,-0.30679468  
5296847,0.758999653834185,NA  
"20980","LCMT1-  
AS2",0.454967458284589,0.427768721310666,2.16893863245554,0.1972249075  
69825,0.843651539980978,NA

"20981", "AQP8", 0.64454783976837, -1.45748547819307, 2.17160252699357, -0.671156650480995, 0.502120741053084, NA  
"20982", "HS3ST4", 0.102686272020481, -0.0533240139618846, 3.35247519753738, -0.0159058638229612, 0.987309491940711, NA  
"20983", "LINC02195", 0.339864471462479, 1.41585126689362, 2.25834142545234, 0.626942963954188, 0.53069662299669, NA  
"20984", "AC109449.1", 1.00989874081901, 0.403368067245594, 1.45281189106593, 0.277646452184283, 0.781283769816081, NA  
"20985", "IL21R", 1.43434178267312, -0.871508997594189, 1.7235941083298, -0.50563470447152, 0.613113114034006, NA  
"20986", "IL21R-AS1", 0.388177823107502, -0.770699685600376, 2.51958549508263, -0.30588352215256, 0.759693332445144, NA  
"20987", "AC002551.1", 0, NA, NA, NA, NA, NA  
"20988", "AC016597.1", 0.681796529335125, 1.39562132797263, 2.29045037218428, 0.609321793181531, 0.542311164585007, NA  
"20989", "GSG1L", 0, NA, NA, NA, NA, NA  
"20990", "SBK1", 0.73305309700322, -0.132985888315148, 2.56283454764942, -0.0518901574965577, 0.958616216891409, NA  
"20991", "NPIPB6", 1.2147477663054, 1.42385117986307, 1.62867646624521, 0.874238198545134, 0.381988547631941, NA  
"20992", "IL27", 0.698864836313948, -2.38636064604339, 2.1534292107879, -1.10816767697242, 0.26778940744301, NA  
"20993", "NPIPB8", 0, NA, NA, NA, NA, NA  
"20994", "AC145285.3", 0, NA, NA, NA, NA, NA  
"20995", "AC145285.6", 1.69434288522291, 0.66094670707135, 1.18198907957819, 0.55918173737038, 0.576037695578084, NA  
"20996", "AC133550.2", 0.405622050705154, 1.62413286989577, 2.47276440990161, 0.656808575613716, 0.511304009430585, NA  
"20997", "AC133550.3", 0.970848045578665, 0.848225262067752, 1.56700349824891, 0.541304000288208, 0.58829806368583, NA  
"20998", "ATP2A1", 0.541657100719842, 0.175644042486432, 1.84098192445439, 0.0954078039296811, 0.923990917717197, NA  
"20999", "ATP2A1-AS1", 1.19771542227959, 1.12662277937973, 1.5882175021394, 0.709363029850837, 0.478099223777233, NA  
"21000", "CD19", 2.24965217686079, 1.23679875857139, 1.11855556396552, 1.10571061323648, 0.268851794803254, NA  
"21001", "AC109460.1", 0.827484066189057, 0.959019627271198, 1.68837966451637, 0.568011832543543, 0.570026933420179, NA  
"21002", "AC009093.5", 0, NA, NA, NA, NA, NA  
"21003", "AC009093.6", 1.98531788879625, -1.63837386739354, 1.02626281423662, -1.59644668467525, 0.110389100176368, NA  
"21004", "SLX1B", 0.447860456993248, -0.701017632084265, 2.19365360739042, -0.319566238590512, 0.749297170995173, NA  
"21005", "NPIPB12", 0.106924501560529, 0.385965786494404, 3.34626872025989, 0.115342137395477, 0.908173940404949, NA  
"21006", "AC009133.3", 0.100823152638361, -1.35173207482145, 3.35247519753738, -0.40320419844251, 0.686798011343181, NA  
"21007", "AC009133.4", 0.320437418636037, -2.09332987365482, 3.00355285611

36,-0.696951235399085,0.485833312087704,NA  
"21008","AC009133.2",0.302935778684673,1.24376146070571,3.128474743470  
89,0.397561611549346,0.690953362451962,NA  
"21009","AC120114.2",0.712502680274898,0.313037142756252,1.73673913974  
011,0.180244191884278,0.856960866408213,NA  
"21010","SEZ6L2",0.219614265997676,-1.35173207482145,3.35247519753738,  
-0.40320419844251,0.686798011343181,NA  
"21011","ASPHD1",1.01930057445744,-1.61739223428469,1.44145654312214,-  
1.12205410700865,0.261839435169046,NA  
"21012","AC120114.1",0.935670242922201,0.814090011692289,1.54601834141  
246,0.526572026919504,0.598490821726813,NA  
"21013","DOC2A",0.413371604734378,-0.0619360379224834,2.49054660530835  
, -0.0248684516846514,0.980159891356585,NA  
"21014","AC093512.1",1.53625880649885,-0.250666537428448,1.14330252659  
103,-0.21924777703051,0.826457040029388,NA  
"21015","TBX6",1.25129044672836,-0.271878006444038,1.37869633997373,-0  
.197199338651481,0.843671548133632,NA  
"21016","AC012645.4",1.88523027502486,-0.0555179749407398,1.2382022470  
8485,-0.0448375659723184,0.964236781873943,NA  
"21017","AC012645.3",0.229815389915947,-0.207595008908767,3.3424514271  
8562,-0.0621086090347659,0.950476341218052,NA  
"21018","AC106782.5",0.165319271277154,-0.774663427007578,3.3524751975  
3738,-0.231072082972193,0.817258802814835,NA  
"21019","AC116348.1",0.100823152638361,-1.35173207482145,3.35247519753  
738,-0.40320419844251,0.686798011343181,NA  
"21020","AC116348.2",0.102230937222884,-1.35173207482145,3.35247519753  
738,-0.403204198442509,0.686798011343181,NA  
"21021","AC002310.2",0.519264050360496,-0.218221100791361,2.1244469546  
7237,-0.102719016029758,0.918185980868267,NA  
"21022","AC093249.2",0.0644961186387932,-0.0533240139618838,3.35247519  
753738,-0.015905863822961,0.987309491940711,NA  
"21023","AC135048.2",0,NA,NA,NA,NA,NA  
"21024","AC135048.3",1.33489054655894,0.906274347592836,1.312234102977  
23,0.690634655460224,0.489795163214567,NA  
"21025","AC135050.1",2.03011510930162,-0.101940340056109,1.11471009010  
491,-0.0914500917871075,0.927134960973358,NA  
"21026","AC135050.4",0.102686272020481,-0.0533240139618846,3.352475197  
53738,-0.0159058638229612,0.987309491940711,NA  
"21027","AC135050.5",0.871293830130078,0.344168390832687,1.52539594309  
035,0.225625610446705,0.82149262016946,NA  
"21028","PRSS8",0.168565237602375,-1.35173207482145,3.35247519753738,-  
0.40320419844251,0.686798011343181,NA  
"21029","TRIM72",0.796709000798617,1.72466533707016,1.92365439685396,0  
.896556751509401,0.369955484496102,NA  
"21030","ITGAD",0,NA,NA,NA,NA,NA  
"21031","COX6A2",0.270796174825259,-2.10201442494854,3.17084321545501,  
-0.662919697417743,0.507381985665671,NA  
"21032","AC026471.5",0,NA,NA,NA,NA,NA  
"21033","SLC5A2",0.896449499529918,-0.0756379395990006,1.6882252698546  
4,-0.0448032267669547,0.964264153089341,NA

"21034","AC074050.4",0.945134911860355,1.08815816995691,1.604404943550  
53,0.678231623712669,0.497624844598225,NA  
"21035","AC002519.1",0.660448214079157,0.0887612461641033,1.7734394530  
6439,0.05005033919299,0.960082273683581,NA  
"21036","AC133485.7",0.102686272020481,-0.0533240139618846,3.352475197  
53738,-0.0159058638229612,0.987309491940711,NA  
"21037","TP53TG3D",1.16398893662669,-2.21813071458697,1.58153548446622  
,-1.40251719697305,0.160760858857391,NA  
"21038","AC136944.2",0.81557016437648,1.50535962762253,1.7791658210580  
5,0.846104174105202,0.397494632388817,NA  
"21039","SHCBP1",2.18880674082796,-0.0589878261324711,1.01697664235757  
,-0.0580031277765878,0.953746137117979,NA  
"21040","AC092368.3",0.885934016337445,2.77444487099961,1.806640911912  
15,1.5356924847136,0.124613819136974,NA  
"21041","AC012186.2",0.102230937222884,-1.35173207482145,3.35247519753  
738,-0.403204198442509,0.686798011343181,NA  
"21042","MYLK3",0.417033113137611,0.413097229319217,2.22161725051422,0  
.185944374182187,0.852488383400628,NA  
"21043","AC018845.3",0.273076516777941,-0.774665331385065,3.1847619460  
6587,-0.243241204367569,0.807818548712931,NA  
"21044","NET02",0.982705615569276,0.456044085091462,1.55824664112357,0  
.292664892101184,0.769778307475622,NA  
"21045","AC007533.1",0.269868662679755,1.13857476503723,3.232474371463  
12,0.352230098121977,0.724665706448339,NA  
"21046","AC007599.2",0.695660842149178,1.44809844222269,2.011373273929  
17,0.719955097839132,0.471552642379038,NA  
"21047","ABCC11",0.346581969557291,-1.38612727586565,2.96955222737921,  
-0.466779894654011,0.640657361748092,NA  
"21048","AC023813.3",1.52187003787169,1.22912953640197,1.2479391397499  
6,0.984927467414989,0.324659700244033,NA  
"21049","AC027348.1",1.79542513551042,-0.391230931286663,1.10181881315  
145,-0.355077374443858,0.722531626257223,NA  
"21050","NKD1",1.63220084702028,1.72377941433943,1.45773082591444,1.18  
250872088,0.23700390724422,NA  
"21051","AC007608.2",0,NA,NA,NA,NA,NA  
"21052","AC007608.1",0.102230937222884,-1.35173207482145,3.35247519753  
738,-0.403204198442509,0.686798011343181,NA  
"21053","AC007608.3",0.990779018316972,-0.0978381232908411,1.396208254  
90245,-0.070074161893332,0.944134631958034,NA  
"21054","SNX20",2.16755047531884,1.22621034564987,1.15793079524144,1.0  
5896686631794,0.289614869776745,NA  
"21055","NOD2",1.17368884117242,0.907513590992268,1.33849217112108,0.6  
78011878270578,0.49776416187332,NA  
"21056","AC007728.3",0,NA,NA,NA,NA,NA  
"21057","AC007728.2",1.54213832967611,-1.565856357006,1.17486438440063  
,-1.33279753629168,0.182598254462248,NA  
"21058","SALL1",0.538801718122894,-1.37181357216896,1.87316993432587,-  
0.732348703142438,0.4639557598547,NA  
"21059","AC087564.1",0.310433926219371,0.171794429070976,2.65395493672  
705,0.0647314793079491,0.948387798511658,NA



"21060", "CASC16", 0.542464907018676, -2.21272512495191, 2.04039814588289, -1.08445752581021, 0.278161989577925, NA  
"21061", "AC007906.1", 0.244806367132003, 0.695807100884759, 3.33664907448574, 0.208534696143316, 0.834811494458112, NA  
"21062", "AC007342.5", 0, NA, NA, NA, NA, NA  
"21063", "AC007342.1", 0.371644265105043, -0.769794427818552, 2.54805679340679, -0.302110388516626, 0.762567913357264, NA  
"21064", "AC007497.2", 0.0644961186387932, -0.0533240139618838, 3.35247519753738, -0.015905863822961, 0.987309491940711, NA  
"21065", "AC007497.1", 0.724043762862663, 0.0840317480093297, 1.81080360393238, 0.0464057768754406, 0.962986832194483, NA  
"21066", "AC007496.2", 1.06718540140755, 1.03565931664573, 1.71188603288712, 0.604981462988558, 0.545191313584019, NA  
"21067", "AC106738.1", 1.75991009498114, -0.259550543237707, 1.18846053590961, -0.218392227083128, 0.827123521272692, NA  
"21068", "AC007336.2", 0, NA, NA, NA, NA, NA  
"21069", "MMP2-AS1", 1.55884254933983, -2.56236360247848, 1.61254148874394, -1.5890218145484, 0.112055467789723, NA  
"21070", "CAPNS2", 0.920544469504266, 0.787825091918637, 1.56919044820526, 0.502058301986036, 0.61562651047741, NA  
"21071", "AC040168.1", 0.409834418486731, -0.652810654152876, 2.88164066178528, -0.226541311278012, 0.820780432500617, NA  
"21072", "AC079411.1", 0, NA, NA, NA, NA, NA  
"21073", "AC009102.2", 0, NA, NA, NA, NA, NA  
"21074", "AC106779.1", 0.688470974737741, 1.19565235273792, 1.77945923079253, 0.671918935847381, 0.501635304734536, NA  
"21075", "SLC12A3", 0, NA, NA, NA, NA, NA  
"21076", "AC012181.2", 0.11921983002294, -0.0533240139618846, 3.35247519753738, -0.0159058638229612, 0.987309491940711, NA  
"21077", "CETP", 1.63015044408511, 2.03567759837043, 1.39907431147695, 1.45501749383236, 0.145664418510772, NA  
"21078", "AC023825.2", 0, NA, NA, NA, NA, NA  
"21079", "ADGRG5", 0.506591527324156, 0.964296520217758, 1.88694319106877, 0.511036328375937, 0.609325618928538, NA  
"21080", "ADGRG3", 0.452323150737606, 1.85838317721192, 2.33387244976565, 0.796265955921678, 0.425877468757482, NA  
"21081", "AC092118.2", 0.917797298660924, -1.27467013866041, 1.64145370692801, -0.776549550730836, 0.437424575761575, NA  
"21082", "TEPP", 0.204461874445769, -1.96013641505178, 3.33548947920397, -0.587660799793491, 0.556759992345141, NA  
"21083", "MMP15", 2.34596567558, -0.585301932969702, 0.933434701250602, -0.627041111912299, 0.530632286616727, NA  
"21084", "AC009118.2", 1.3107665855864, -0.419328278823103, 1.77699392459314, -0.235976202855681, 0.81345113613463, NA  
"21085", "NDRG4", 1.64592141859592, -2.21770408762061, 1.53656112366424, -1.44329050987054, 0.14893865201755, NA  
"21086", "AC040174.1", 0.205372544040962, 0.695830627438559, 3.33747149429751, 0.208490358233014, 0.834846110249776, NA  
"21087", "AC138305.1", 0, NA, NA, NA, NA, NA

"21088", "AC093536.2", 0, NA, NA, NA, NA, NA  
"21089", "AC092131.1", 0.0644961186387932, -0.0533240139618838, 3.35247519  
753738, -0.015905863822961, 0.987309491940711, NA  
"21090", "LINC02126", 1.44528251907356, 1.9562467610618, 1.74352795627413,  
1.12200481444659, 0.261860392883088, NA  
"21091", "LINC00922", 0.522083723912758, -2.97120196923621, 2.568275310055  
36, -1.15688608522743, 0.247318904464802, NA  
"21092", "LINC00920", 0.306692811668653, -2.34839005368482, 3.320101142424  
53, -0.707324853353681, 0.479364624090735, NA  
"21093", "BEAN1-  
AS1", 0.167182390659274, 0.576034712544328, 3.34068880739852, 0.1724299226  
16139, 0.863099549623161, NA  
"21094", "AC010542.4", 0.60651411010723, 0.128233455072127, 2.099171732296  
13, 0.0610876438069511, 0.951289409586541, NA  
"21095", "AC010542.5", 0.274913018026089, -0.226100793799534, 2.7407223210  
9206, -0.0824967900102491, 0.934251670836265, NA  
"21096", "AC018557.3", 0.23843966004588, 0.69583062743856, 3.3374714942975  
1, 0.208490358233014, 0.834846110249776, NA  
"21097", "AC044802.1", 0.551499178800657, -1.10038970849099, 2.33611426399  
405, -0.471034197877658, 0.637616313896921, NA  
"21098", "TERB1", 0.102230937222884, -1.35173207482145, 3.35247519753738, -  
0.403204198442509, 0.686798011343181, NA  
"21099", "AC044802.2", 1.111888585856, 1.12316857441226, 1.4879235671676, 0  
.754856364396666, 0.450335170131077, NA  
"21100", "CES3", 0.102230937222884, -1.35173207482145, 3.35247519753738, -0  
.403204198442509, 0.686798011343181, NA  
"21101", "KCTD19", 0.809893729179496, -1.23698503920278, 1.59873053460693,  
-0.773729538797429, 0.439090748086642, NA  
"21102", "AGRP", 0, NA, NA, NA, NA, NA  
"21103", "AC027682.2", 0.388633157905099, 0.432636944008462, 2.25154176219  
256, 0.192151418762563, 0.84762359891593, NA  
"21104", "AC027682.4", 0.786239218216268, -1.74487396800981, 1.73947063060  
283, -1.00310631137538, 0.315809569847739, NA  
"21105", "AC027682.1", 2.03174425901758, -0.0376262269850736, 1.0064696990  
5804, -0.0373843614172272, 0.970178541735818, NA  
"21106", "AC009095.1", 0.4410650332435, -1.51464669453298, 2.3969062624245  
9, -0.631917367098386, 0.5274408743423, NA  
"21107", "CARMIL2", 0.871395073418862, -0.36217688518452, 1.65668895069219  
, -0.218614897523882, 0.826950046952808, NA  
"21108", "AC010530.1", 0.692965735202301, -0.235988864003827, 1.7878992214  
5429, -0.131992262859129, 0.89499041154859, NA  
"21109", "CTRL", 1.41883736549702, -0.629339296739942, 1.18228656168291, -0  
.532306901842915, 0.594513452792591, NA  
"21110", "DPEP3", 0.370236480520519, -0.776097354626079, 2.25816971304894,  
-0.343684245759458, 0.731083760326458, NA  
"21111", "AC020978.6", 0.610514322307097, -0.130720592567957, 2.0660077590  
3627, -0.0632720724286794, 0.949549854164646, NA  
"21112", "AC020978.7", 0.852676381892117, 1.78984391383129, 1.597267982362  
08, 1.12056582464291, 0.262472718935978, NA  
"21113", "ESRP2", 0, NA, NA, NA, NA, NA

"21114", "AC020978.1", 0.0534622507802646, -0.0533240139618838, 3.35247519753738, -0.015905863822961, 0.987309491940711, NA  
"21115", "SMPD3", 2.14466043182286, 0.944015855574369, 1.04138416252849, 0.906501068042258, 0.364670699833456, NA  
"21116", "AC126773.6", 1.39863698123799, 0.240952331117719, 1.37120332394078, 0.175723269416553, 0.860511353408764, NA  
"21117", "CDH3", 0.464394014995707, -0.70222278617937, 2.1829280667158, -0.321688468294725, 0.747688714834795, NA  
"21118", "AC009137.1", 0, NA, NA, NA, NA, NA  
"21119", "AC009137.2", 0.11921983002294, -0.0533240139618846, 3.35247519753738, -0.0159058638229612, 0.987309491940711, NA  
"21120", "HAS3", 1.1425673622863, 0.9684000816204, 1.56127917245386, 0.620260680284594, 0.535086177271058, NA  
"21121", "DERPC", 0.363896176999636, 0.44456811936779, 2.55357470678334, 0.174096382685352, 0.861789715988516, NA  
"21122", "AC026474.1", 0.715077665379127, 0.65524467993353, 2.59036390757729, 0.252954682551289, 0.800303232591083, NA  
"21123", "PDF", 0.384100793334572, -0.497323302984863, 2.53148359800097, -0.196455273649643, 0.84425383692516, NA  
"21124", "TMED6", 0, NA, NA, NA, NA, NA  
"21125", "AC009032.1", 0.437839388250786, 0.649976429483478, 2.45410107461636, 0.264853162001522, 0.791122581399246, NA  
"21126", "AC092115.2", 0.244806367132003, 0.695807100884759, 3.33664907448574, 0.208534696143316, 0.834811494458112, NA  
"21127", "CLEC18A", 0.361065732044111, 0.3670708605405, 2.57744185534835, 0.142416737657459, 0.886750842401241, NA  
"21128", "CLEC18C", 0, NA, NA, NA, NA, NA  
"21129", "AC012184.4", 0.128992237277586, 0.513744972953418, 3.34245151459318, 0.153703044220807, 0.877843884367224, NA  
"21130", "AC012184.1", 0.219614265997676, -1.35173207482145, 3.35247519753738, -0.40320419844251, 0.686798011343181, NA  
"21131", "VAC14-AS1", 0.244351032334407, -0.774664026145693, 3.30062972833046, -0.234701887187309, 0.814440122883676, NA  
"21132", "CALB2", 0.30714814646625, -1.38503406788992, 3.08534410716656, -0.448907486420329, 0.653498395299422, NA  
"21133", "AC010547.1", 0.645726219683424, -0.666788138570182, 1.66020114815707, -0.40163093448668, 0.687955660113637, NA  
"21134", "TAT-AS1", 0.100823152638361, -1.35173207482145, 3.35247519753738, -0.40320419844251, 0.686798011343181, NA  
"21135", "MARVELD3", 1.02002823588381, -1.52995922428412, 1.59357800083236, -0.960078027862452, 0.337015945864425, NA  
"21136", "AC009127.1", 0, NA, NA, NA, NA, NA  
"21137", "PKD1L3", 0.102686272020481, -0.0533240139618846, 3.35247519753738, -0.0159058638229612, 0.987309491940711, NA  
"21138", "HP", 18.802883688124, 1.43889837221829, 1.70978172105927, 0.841568461339523, NA, NA  
"21139", "AC009087.1", 0, NA, NA, NA, NA, NA  
"21140", "PMFBP1", 0.742286205140313, -2.71138531402312, 2.04291433924469,

-1.32721439266297,0.184437772691365,NA  
"21141","AC004158.1",0,NA,NA,NA,NA,NA  
"21142","AC004943.3",0,NA,NA,NA,NA,NA  
"21143","AC004943.1",0.700997173793439,-0.0568948872626431,2.029569728  
34089,-0.0280329798322094,0.977635847374218,NA  
"21144","AC002044.1",1.09518443789484,0.5832948584781,1.43979320368394  
,0.405124053222122,0.685386326738797,NA  
"21145","AC138627.1",0.985391379151748,-0.551724379160021,1.5192992999  
2552,-0.363143969846539,0.716497340132225,NA  
"21146","AC009120.5",0.410745088081924,1.66416763505049,3.300435467626  
9,0.504226685046224,0.614102090381297,NA  
"21147","CLEC18B",0,NA,NA,NA,NA,NA  
"21148","AC009053.3",0.102686272020481,-0.0533240139618846,3.352475197  
53738,-0.0159058638229612,0.987309491940711,NA  
"21149","FA2H",0,NA,NA,NA,NA,NA  
"21150","AC099508.1",1.81115864993933,-0.0980855771254981,1.0400450938  
8347,-0.0943089657384489,0.924863728031335,NA  
"21151","AC009054.1",1.17265846573056,-0.0658759928955374,1.2752841653  
9713,-0.0516559326015183,0.958802851019244,NA  
"21152","AC009163.4",0,NA,NA,NA,NA,NA  
"21153","CHST6",0.219614265997676,-1.35173207482145,3.35247519753738,-  
0.40320419844251,0.686798011343181,NA  
"21154","AC009163.6",0.102686272020481,-0.0533240139618846,3.352475197  
53738,-0.0159058638229612,0.987309491940711,NA  
"21155","AC025287.2",0.220189306641942,-0.267602342861375,2.9350649655  
7825,-0.0911742486111047,0.927354136344172,NA  
"21156","AC025287.3",0.0644961186387932,-0.0533240139618838,3.35247519  
753738,-0.015905863822961,0.987309491940711,NA  
"21157","AC108125.1",0,NA,NA,NA,NA,NA  
"21158","LINC02125",0,NA,NA,NA,NA,NA  
"21159","AC009139.2",0.102686272020481,-0.0533240139618846,3.352475197  
53738,-0.0159058638229612,0.987309491940711,NA  
"21160","ADAMTS18",0.611316608888282,-1.56204240202239,1.9757709416972  
1,-0.790598934854552,0.429178068603971,NA  
"21161","WVOX-  
AS1",0.411078088196084,-0.771886133852615,2.48376163818463,-0.31077303  
1512309,0.755973172937394,NA  
"21162","AC106743.1",0,NA,NA,NA,NA,NA  
"21163","AC046158.1",1.04414958374159,2.99227909037151,2.0448792698042  
6,1.46330354782165,0.143384337384182,NA  
"21164","AC046158.2",0.0534622507802646,-0.0533240139618838,3.35247519  
753738,-0.015905863822961,0.987309491940711,NA  
"21165","AC009141.1",0.633894859834699,2.25045382198613,1.991282082801  
67,1.13015320201135,0.258411675167207,NA  
"21166","AC027279.2",0.168565237602375,-1.35173207482145,3.35247519753  
738,-0.40320419844251,0.686798011343181,NA  
"21167","AC009145.1",0,NA,NA,NA,NA,NA  
"21168","AC009145.2",0.102230937222884,-1.35173207482145,3.35247519753  
738,-0.403204198442509,0.686798011343181,NA  
"21169","AC009159.2",0.183715948661733,0.576034712544328,3.34068880739

852,0.172429922616139,0.863099549623161,NA  
"21170","AC009159.1",0.20961077358101,0.88584532733971,3.3328088314830  
8,0.265795421258984,0.790396769724465,NA  
"21171","LINC01229",1.31652243147215,1.75784271137896,1.40766471405133  
,1.24876520227591,0.211750964860145,NA  
"21172","LINC01228",0.40309912949739,1.72246360344407,2.38566401784184  
,0.722005944911837,0.470290822507867,NA  
"21173","AC105411.1",2.31664659028638,3.428630742992,1.39910792268925,  
2.45058346635745,0.0142624891517171,NA  
"21174","LINC01227",0,NA,NA,NA,NA,NA  
"21175","AC092332.1",0.244806367132003,0.695807100884759,3.33664907448  
574,0.208534696143316,0.834811494458112,NA  
"21176","ARLNC1",0.0644961186387932,-0.0533240139618838,3.352475197537  
38,-0.015905863822961,0.987309491940711,NA  
"21177","AC092718.2",1.22047470238625,0.0381727944335184,1.45663595428  
113,0.0262061322331957,0.979092924748756,NA  
"21178","AC092718.6",0,NA,NA,NA,NA,NA  
"21179","AC092718.1",0.69564380763015,0.0432271548146393,1.81721173237  
129,0.0237876269697159,0.981022009506042,NA  
"21180","BC01",1.48194678526319,1.11086574651378,1.23258924187808,0.90  
1245693838092,0.367457700822336,NA  
"21181","AC009148.1",1.22390896485256,1.59869941270092,1.4652938796779  
6,1.09104353391027,0.275253727191728,NA  
"21182","AC092139.1",2.15427940203566,0.51431223402668,1.0498092261246  
2,0.489910186753902,0.624197454308184,NA  
"21183","AC099524.1",0.201646305276721,-1.9490730241217,3.335978191579  
6,-0.584258323103367,0.559046527482917,NA  
"21184","SDR42E1",0.168565237602375,-1.35173207482145,3.35247519753738  
, -0.40320419844251,0.686798011343181,NA  
"21185","AC009063.2",1.01716348163969,-0.572354376682912,1.85817381099  
723,-0.308019827475528,0.758067245206278,NA  
"21186","AC009119.1",1.24866692637725,-2.75631304042463,1.514551095072  
07,-1.81988778681216,0.0687760951957922,NA  
"21187","AC040169.3",0.628006590611288,0.289103211120719,2.66518366318  
942,0.108474029431334,0.913619680449019,NA  
"21188","ADAD2",0,NA,NA,NA,NA,NA  
"21189","WFDC1",0,NA,NA,NA,NA,NA  
"21190","ATP2C2",0,NA,NA,NA,NA,NA  
"21191","ATP2C2-  
AS1",0.203509424658842,-0.774663427007579,3.35247519753738,-0.23107208  
2972194,0.817258802814834,NA  
"21192","AC092145.1",0.0534622507802646,-0.0533240139618838,3.35247519  
753738,-0.015905863822961,0.987309491940711,NA  
"21193","AC025280.3",0.632195855327749,1.28995874044672,2.312684283552  
63,0.557775546632397,0.576997662777941,NA  
"21194","AC025280.1",0.102686272020481,-0.0533240139618846,3.352475197  
53738,-0.0159058638229612,0.987309491940711,NA  
"21195","AC092275.1",0.102686272020481,-0.0533240139618846,3.352475197  
53738,-0.0159058638229612,0.987309491940711,NA  
"21196","LINC00311",2.0138485600746,0.405564581132308,1.39377012043967

,0.290983839576337,0.771063679140012,NA  
"21197","AC133540.1",0.333454111723355,-0.818112419595889,3.0429877056  
6036,-0.268851700607955,0.788043806171596,NA  
"21198","AC092127.1",0,NA,NA,NA,NA,NA  
"21199","AC018695.6",0.580553995393652,0.892180001396188,2.05926036401  
637,0.433252645943266,0.664831236086519,NA  
"21200","AC018695.9",0.167182390659274,0.576034712544328,3.34068880739  
852,0.172429922616139,0.863099549623161,NA  
"21201","LINC02132",0.0644961186387932,-0.0533240139618838,3.352475197  
53738,-0.015905863822961,0.987309491940711,NA  
"21202","AC135012.1",0.167182390659274,0.576034712544328,3.34068880739  
852,0.172429922616139,0.863099549623161,NA  
"21203","LINC01081",0.128992237277586,0.513744972953418,3.342451514593  
18,0.153703044220807,0.877843884367224,NA  
"21204","FOX1",1.37813587771667,0.42563011159013,1.45366346733098,0.2  
92798244680121,0.769676370029569,NA  
"21205","AC009108.3",0.324574583169373,1.31799784995945,2.580632617255  
84,0.510726649406209,0.609542477387077,NA  
"21206","AC010531.6",1.12515102532309,0.840771928676687,1.583959250460  
61,0.530804014328144,0.595554597975567,NA  
"21207","AC010531.3",0.166727055861678,-0.774663427007578,3.3524751975  
3738,-0.231072082972193,0.817258802814835,NA  
"21208","AC092720.1",0.0534622507802646,-0.0533240139618838,3.35247519  
753738,-0.015905863822961,0.987309491940711,NA  
"21209","JPH3",0,NA,NA,NA,NA,NA  
"21210","AC010536.3",0,NA,NA,NA,NA,NA  
"21211","AC010536.1",0.183715948661733,0.576034712544328,3.34068880739  
852,0.172429922616139,0.863099549623161,NA  
"21212","AC126696.1",0,NA,NA,NA,NA,NA  
"21213","AC126696.2",0,NA,NA,NA,NA,NA  
"21214","AC134312.3",1.29608990715957,0.0893236855594414,1.31969579690  
866,0.0676850572447674,0.946036344621682,NA  
"21215","AC134312.1",0.305740361881726,-1.38485840137887,2.64966120810  
703,-0.52265489532839,0.601214431685811,NA  
"21216","LINC02182",2.17562311368714,0.0745673030990357,0.965216609253  
543,0.077254475714734,0.938421105738187,NA  
"21217","IL17C",0.102686272020481,-0.0533240139618846,3.35247519753738  
, -0.0159058638229612,0.987309491940711,NA  
"21218","SNAI3",0.0644961186387932,-0.0533240139618838,3.3524751975373  
8,-0.015905863822961,0.987309491940711,NA  
"21219","AC138028.6",0.891079829541295,0.565990213212775,1.64427979194  
149,0.344217703085969,0.730682569744856,NA  
"21220","AC138028.4",0.973240946631122,0.080013960608643,1.52084019875  
884,0.0526116818019029,0.958041309130965,NA  
"21221","AC138028.2",0.98402170679426,0.267105596445996,1.671267173086  
2,0.159822200033256,0.873021135771799,NA  
"21222","AC138028.1",1.03403352422126,2.17240526064103,1.7483119065827  
6,1.2425730514455,0.214025205556485,NA  
"21223","AC092384.1",0.0534622507802646,-0.0533240139618838,3.35247519  
753738,-0.015905863822961,0.987309491940711,NA

"21224", "AC135782.1", 0.514440465867543, -1.68934127809889, 2.30099132041076, -0.734179769872975, 0.462839181384226, NA  
"21225", "AC135782.3", 0.102686272020481, -0.0533240139618846, 3.35247519753738, -0.0159058638229612, 0.987309491940711, NA  
"21226", "LINC00304", 0.72067948504393, -0.0731744831703934, 1.75652224005209, -0.0416587285386283, 0.966770755234497, NA  
"21227", "CDH15", 0, NA, NA, NA, NA, NA  
"21228", "AC137932.1", 1.098500046652, -3.1999332670837, 1.97245936257268, -1.62230630846053, 0.104737778620162, NA  
"21229", "AC137932.2", 1.20414628307519, -0.517911823210181, 1.45773007829971, -0.355286503941987, 0.722374965104636, NA  
"21230", "AC092120.1", 0, NA, NA, NA, NA, NA  
"21231", "AC092120.3", 0, NA, NA, NA, NA, NA  
"21232", "AC092123.1", 1.36746800345211, 0.594156709698819, 1.54760208551224, 0.383920851012656, 0.701037111591317, NA  
"21233", "CPNE7", 0.154285403418625, -0.774663427007578, 3.35247519753738, -0.231072082972193, 0.817258802814835, NA  
"21234", "DPEP1", 1.13312398866509, -2.94064669596464, 1.9527564860611, -1.50589523934764, 0.132094068866213, NA  
"21235", "LINC02166", 0.445055873796195, 1.72546304406976, 2.42925440303552, 0.710285033100557, 0.477527399177721, NA  
"21236", "DBNDD1", 0.430255415020549, 1.79384505583524, 2.3545616919526, 0.761859441596384, 0.446143898930827, NA  
"21237", "AC133919.1", 1.20997698586114, -0.0764678209513916, 1.42545127510207, -0.0536446403234064, 0.957218289858979, NA  
"21238", "AC240565.2", 0.11921983002294, -0.0533240139618846, 3.35247519753738, -0.0159058638229612, 0.987309491940711, NA  
"21239", "AC240565.1", 0.267550208500038, -1.3833228396413, 2.75673373075219, -0.501797770386714, 0.615809781659427, NA  
"21240", "DOC2B", 0.616117632122886, 2.25194787981181, 3.07738044083081, 0.731774287615817, 0.464306345375351, NA  
"21241", "AC141424.1", 0, NA, NA, NA, NA, NA  
"21242", "AC087392.3", 0.154285403418625, -0.774663427007578, 3.35247519753738, -0.231072082972193, 0.817258802814835, NA  
"21243", "AC087392.5", 0.475574206834877, -0.339714232215584, 2.39628239541041, -0.141767194411743, 0.887263897366255, NA  
"21244", "AC032044.1", 0.220042982661301, -0.774663427007579, 3.35247519753738, -0.231072082972194, 0.817258802814834, NA  
"21245", "AC130343.1", 0, NA, NA, NA, NA, NA  
"21246", "AC090617.3", 0.0644961186387932, -0.0533240139618838, 3.35247519753738, -0.015905863822961, 0.987309491940711, NA  
"21247", "AC090617.5", 0.322300538018157, -0.774667165166207, 3.0144598883595, -0.256983736342828, 0.797191328075268, NA  
"21248", "AC090617.4", 0, NA, NA, NA, NA, NA  
"21249", "AC090617.1", 0.102686272020481, -0.0533240139618846, 3.35247519753738, -0.0159058638229612, 0.987309491940711, NA  
"21250", "AC006435.2", 0.489027593879835, -0.895638135730071, 2.12086586785986, -0.422298340174548, 0.672807269533129, NA  
"21251", "AC005696.2", 0.102230937222884, -1.35173207482145, 3.35247519753738, -0.403204198442509, 0.686798011343181, NA

"21252", "AC005696.1", 0.824224148194408, 1.78240663437099, 1.669446599344  
19, 1.06766316159569, 0.285672481290688, NA  
"21253", "AC005696.4", 0.50385445622072, -0.0484666679965598, 2.7299083828  
9417, -0.0177539540521784, 0.985835138306683, NA  
"21254", "AC015921.1", 0, NA, NA, NA, NA, NA  
"21255", "OR3A2", 0.844446555423873, 0.949719049228123, 1.71032968533659, 0  
.555284198929879, 0.578700284971082, NA  
"21256", "OR3A1", 0.468255049961827, 0.778245414755057, 2.40076795255901, 0  
.324165196359571, 0.745812969843302, NA  
"21257", "OR1E1", 0.201646305276721, -1.9490730241217, 3.3359781915796, -0.  
584258323103367, 0.559046527482917, NA  
"21258", "OR3A3", 0.431928015962259, 1.75105566541513, 2.78636292680805, 0.  
628437756104183, 0.529717209966972, NA  
"21259", "AC027796.4", 0.268005543297635, -0.150415693622294, 2.7727499960  
8506, -0.0542478383679276, 0.956737707263394, NA  
"21260", "P2RX5", 0.718725222112931, 1.4944859265899, 1.96799007660026, 0.7  
59397084548137, 0.447615057017216, NA  
"21261", "HASPIN", 0, NA, NA, NA, NA, NA  
"21262", "P2RX1", 1.7330254307377, -1.02127924328373, 1.13700783560787, -0.  
898216539323785, 0.369070117468189, NA  
"21263", "AC087292.1", 0, NA, NA, NA, NA, NA  
"21264", "AC087742.1", 0, NA, NA, NA, NA, NA  
"21265", "SPNS3", 0.595826092792229, 1.00428635445833, 1.83386646690491, 0.  
547633305140973, 0.583943715937407, NA  
"21266", "AC127521.1", 0, NA, NA, NA, NA, NA  
"21267", "SPNS2", 1.2546005641621, -0.746093277479395, 1.42156255434386, -0  
.524840271854067, 0.599694233253433, NA  
"21268", "SMTNL2", 0.43843390028213, 0.406978656351188, 2.44924928597198, 0  
.166164652443567, 0.868027375954558, NA  
"21269", "ALOX15", 0, NA, NA, NA, NA, NA  
"21270", "AC091153.3", 1.30740158507787, 0.326586100057533, 1.291201541640  
03, 0.252931931635333, 0.800320813681132, NA  
"21271", "GLTPD2", 0.165319271277154, -0.774663427007578, 3.35247519753738  
, -0.231072082972193, 0.817258802814835, NA  
"21272", "CHRNE", 2.17254678195474, -8.73177545612633e-05, 1.0385598200254  
7, -8.40758065906325e-05, 0.999932917212063, NA  
"21273", "C17orf107", 0.858722550382523, 0.353869806315924, 1.699828328053  
44, 0.20817973231518, 0.835088633176623, NA  
"21274", "GP1BA", 0, NA, NA, NA, NA, NA  
"21275", "AC004771.4", 1.53831870175439, -0.0179438254449146, 1.2956611457  
3864, -0.0138491653500075, 0.988950318008713, NA  
"21276", "AC004771.2", 0.360215411778057, 0.425500609779393, 3.00480395020  
233, 0.141606779287794, 0.887390611802997, NA  
"21277", "AC004771.3", 1.6879841217451, -0.160986301819748, 1.323560758933  
11, -0.121631213930455, 0.903191091875065, NA  
"21278", "AC004771.1", 0.155693188003149, -0.774663427007578, 3.3524751975  
3738, -0.231072082972193, 0.817258802814835, NA  
"21279", "SLC52A1", 0.22202748838264, -0.774663427007578, 3.35247519753738  
, -0.231072082972193, 0.817258802814835, NA  
"21280", "USP6", 0, NA, NA, NA, NA, NA



"21281", "SCIMP", 1.3669455861376, -0.489248778618222, 1.26874505158793, -0.385616304872195, 0.699780855948314, NA  
"21282", "AC087500.2", 0, NA, NA, NA, NA, NA  
"21283", "AC015727.1", 1.15448987720666, 1.34585315931622, 1.46982112397559, 0.915657788123178, 0.359846411461039, NA  
"21284", "AC055839.2", 0.778498999547556, -0.659272897318081, 1.72013856633555, -0.383267319401219, 0.701521567937, NA  
"21285", "WSCD1", 0.156148522800746, 0.494635591052761, 3.34300496985029, 0.147961368742719, 0.882373255878367, NA  
"21286", "AIPL1", 0.205372544040962, 0.695830627438559, 3.33747149429751, 0.208490358233014, 0.834846110249776, NA  
"21287", "PIMREG", 0.261339925134462, 0.693947743382389, 3.27302645474789, 0.212020206062111, 0.832091270506721, NA  
"21288", "AC004706.3", 0.608702758700371, 0.841086318852186, 2.03492112712964, 0.413326250162128, 0.679367599955668, NA  
"21289", "FBX039", 0, NA, NA, NA, NA, NA  
"21290", "BCL6B", 2.2474878984303, -1.26928661758177, 0.995345896648871, -1.27522163084732, 0.202230807168087, NA  
"21291", "SLC16A13", 0.273076516777941, -0.774665331385065, 3.18476194606587, -0.243241204367569, 0.807818548712931, NA  
"21292", "ASGR2", 0.23843966004588, 0.69583062743856, 3.33747149429751, 0.208490358233014, 0.834846110249776, NA  
"21293", "SLC2A4", 0, NA, NA, NA, NA, NA  
"21294", "TNK1", 1.87247052085413, -2.15066217991201, 1.46568456442114, -1.46734313243, 0.142282735863612, NA  
"21295", "SPEM1", 0, NA, NA, NA, NA, NA  
"21296", "SPEM2", 0, NA, NA, NA, NA, NA  
"21297", "SLC35G6", 0, NA, NA, NA, NA, NA  
"21298", "AC016876.3", 1.25661100337667, -0.41642757854255, 1.73192596960023, -0.240441904476248, 0.809987695746797, NA  
"21299", "SHBG", 1.97803882156269, 0.175445582219405, 1.33363420496557, 0.131554500901493, 0.895336675660936, NA  
"21300", "ATP1B2", 2.00306061600161, 1.74178638840877, 1.23136181007773, 1.41452039047632, 0.157209164769574, NA  
"21301", "EFNB3", 1.49915910035341, -1.7483966331755, 1.42386473753531, -1.22792326201009, 0.219475776194836, NA  
"21302", "KCNAB3", 1.95040325569013, -1.2482496346698, 1.15162080231474, -1.0839068139103, 0.278406118136411, NA  
"21303", "ALOX15B", 0.422668355858921, -2.6205236288258, 2.36866382348853, -1.10632990753679, 0.268583751419472, NA  
"21304", "HES7", 1.63291784663091, -0.686403946897442, 1.20336676331299, -0.570402945987726, 0.568404431920333, NA  
"21305", "AURKB", 0.656049494320306, 1.13876194614222, 1.97825585603088, 0.575639365692062, 0.564858967141205, NA  
"21306", "ARHGEF15", 0.284539101300094, -0.150986859606036, 2.72667162408639, -0.0553740532128162, 0.955840466649586, NA  
"21307", "RNF222", 0.309302485770796, 1.17088912763199, 2.66183894910263, 0.439879778611974, 0.660024182340411, NA  
"21308", "CCDC42", 0.493278998005496, -1.20446705642703, 2.37941238571071, -0.506203575160119, 0.612713745475208, NA

"21309", "PIK3R6", 0.441493749907125, -0.674949016570692, 2.46628730153846, -0.273670069237133, 0.784338181194027, NA  
"21310", "AC002091.2", 0, NA, NA, NA, NA, NA  
"21311", "AC002091.1", 0.201646305276721, -1.9490730241217, 3.3359781915796, -0.584258323103367, 0.559046527482917, NA  
"21312", "AC005695.1", 0, NA, NA, NA, NA, NA  
"21313", "AC005695.3", 0.400954889932749, 1.59850620341007, 2.47658740299608, 0.645447118674776, 0.518637476998728, NA  
"21314", "CFAP52", 0.711640222646646, 1.26893785194412, 1.96843163339629, 0.644644106716943, 0.519157845031061, NA  
"21315", "USP43", 0.204917209243366, -0.774663427007578, 3.35247519753738, -0.231072082972194, 0.817258802814834, NA  
"21316", "GLP2R", 0.256971675439106, -0.226175799809587, 2.79502848435046, -0.0809207494935953, 0.935504978368658, NA  
"21317", "MYH1", 0.167182390659274, 0.576034712544328, 3.34068880739852, 0.172429922616139, 0.863099549623161, NA  
"21318", "MYH2", 0.231678509298067, 0.99788326475647, 3.33029638254771, 0.299637975162162, 0.764453314336329, NA  
"21319", "AC015908.4", 0.23843966004588, 0.69583062743856, 3.33747149429751, 0.208490358233014, 0.834846110249776, NA  
"21320", "AC005725.1", 0.764981087087692, 2.5073399374856, 1.90047491473138, 1.3193228271787, 0.187061209502364, NA  
"21321", "AC005410.2", 0.717248847233984, -1.67130669419584, 1.75775715616471, -0.950817744268214, 0.341696903343228, NA  
"21322", "MYOCD", 0.201646305276721, -1.9490730241217, 3.3359781915796, -0.584258323103367, 0.559046527482917, NA  
"21323", "AC005303.1", 1.17060313779285, 3.12499219728478, 1.58998764208817, 1.96541917343499, 0.0493657421391584, NA  
"21324", "AC005304.2", 0.205372544040962, 0.695830627438559, 3.33747149429751, 0.208490358233014, 0.834846110249776, NA  
"21325", "AC005304.3", 0.439657248658977, -1.50832565035379, 2.39823821350385, -0.628930704990358, 0.529394423116454, NA  
"21326", "HS3ST3B1", 1.08832884309802, -0.147766138574929, 1.48164708352154, -0.09973099547007, 0.920557892382754, NA  
"21327", "AC005224.3", 0, NA, NA, NA, NA, NA  
"21328", "AC005224.2", 0.569398741195905, 2.09321734892959, 2.30710082726912, 0.907293397925441, 0.364251664530609, NA  
"21329", "AC022816.1", 0, NA, NA, NA, NA, NA  
"21330", "CDRT1", 0.256971675439106, -0.226175799809587, 2.79502848435046, -0.0809207494935953, 0.935504978368658, NA  
"21331", "AC015922.2", 0.943539502798095, -0.392402609136215, 1.39630637682942, -0.281029017447618, 0.778688143615212, NA  
"21332", "AC093484.3", 0.244351032334407, -0.774664026145693, 3.30062972833046, -0.234701887187309, 0.814440122883676, NA  
"21333", "AC093484.2", 0.321012459280303, -0.877466363834499, 2.33488982647705, -0.37580632451444, 0.70706088561625, NA  
"21334", "AC127540.2", 0.37759929004657, 0.381134982021306, 2.25853338012443, 0.168753309282641, 0.865990685290599, NA  
"21335", "AC127540.1", 0.242943247749883, -0.774663951729422, 3.30711343151841, -0.234241724020258, 0.814797324817481, NA

"21336", "FAM106C", 0.219614265997676, -1.35173207482145, 3.35247519753738, -0.40320419844251, 0.686798011343181, NA  
"21337", "TNFRSF13B", 0.100823152638361, -1.35173207482145, 3.35247519753738, -0.40320419844251, 0.686798011343181, NA  
"21338", "AC104024.1", 0.0534622507802646, -0.0533240139618838, 3.35247519753738, -0.015905863822961, 0.987309491940711, NA  
"21339", "AC104024.4", 2.10023422019316, -0.558866173674021, 1.05884272412535, -0.527808484622367, 0.597632267624704, NA  
"21340", "AC055811.1", 0, NA, NA, NA, NA, NA  
"21341", "AC020558.1", 0.675061782152552, 2.39449905497411, 1.88371148687511, 1.27116019181172, 0.203671665325763, NA  
"21342", "SMCR2", 0, NA, NA, NA, NA, NA  
"21343", "AC122129.1", 0.347037304354888, -0.0545756175730095, 2.6140053044848, -0.0208781586936244, 0.983342849664216, NA  
"21344", "AC087164.1", 0.717438823867626, 0.335006990677025, 1.77379500464545, 0.188864547368588, 0.850198980564068, NA  
"21345", "AC127537.1", 0.814326494667127, 1.53547375944424, 1.92534256975015, 0.797506783244035, 0.425156764901316, NA  
"21346", "LGALS9C", 0.0534622507802646, -0.0533240139618838, 3.35247519753738, -0.015905863822961, 0.987309491940711, NA  
"21347", "AC107982.3", 1.5103817724741, -0.380137123450441, 1.22838054867163, -0.309462017989068, 0.75697010033053, NA  
"21348", "FAM83G", 0.429225039578686, 0.175903833931608, 2.42785326770701, 0.0724524155851234, 0.942241872755202, NA  
"21349", "GRAP", 0.102230937222884, -1.35173207482145, 3.35247519753738, -0.403204198442509, 0.686798011343181, NA  
"21350", "AC007952.2", 0.538776780481471, -3.02494880370971, 2.51696373649532, -1.20182454750886, 0.229431512632645, NA  
"21351", "GRAPL", 0.221450767245824, -0.774663427007578, 3.35247519753738, -0.231072082972194, 0.817258802814834, NA  
"21352", "AC007952.6", 0, NA, NA, NA, NA, NA  
"21353", "EPN2-AS1", 0.530753253016621, 0.917925616357591, 1.93129997964599, 0.475288989815994, 0.634581005667484, NA  
"21354", "AC115989.1", 0.11921983002294, -0.0533240139618846, 3.35247519753738, -0.0159058638229612, 0.987309491940711, NA  
"21355", "SLC47A2", 0.62663311531536, -1.33647846153652, 2.22910663965159, -0.599557884653472, 0.548800921996005, NA  
"21356", "AC005722.3", 0.182454488057851, 0.814003878402388, 3.33451052748657, 0.244114952312343, 0.80714179253596, NA  
"21357", "AC005730.3", 0.166727055861678, -0.774663427007578, 3.35247519753738, -0.231072082972193, 0.817258802814835, NA  
"21358", "AC008088.1", 0, NA, NA, NA, NA, NA  
"21359", "LGALS9B", 0.203054089861245, -1.95461545718866, 3.33573296423696, -0.585962808817275, 0.557900507779092, NA  
"21360", "AC015818.2", 0.22202748838264, -0.774663427007578, 3.35247519753738, -0.231072082972193, 0.817258802814835, NA  
"21361", "LINC01563", 0, NA, NA, NA, NA, NA  
"21362", "AC068418.3", 1.61951655976907, -1.04757395159668, 1.1925252063319, -0.878450154373615, 0.37969947670796, NA

"21363", "MTRNR2L1", 1.36285536107074, -1.14883262299383, 1.40782364686085, -0.816034469626569, 0.414480421395743, NA  
"21364", "AC026254.2", 1.50872972814195, 0.49916822105067, 1.24296130123245, 0.401595947159194, 0.687981413030411, NA  
"21365", "AC069366.2", 1.81287734040209, -0.544706503236606, 1.11921878147419, -0.486684562708232, 0.626481886702038, NA  
"21366", "NOS2", 0.902167571645425, 1.80939073659406, 1.85266784958067, 0.976640652021671, 0.328747086046104, NA  
"21367", "AC005697.2", 0.348606503275262, -0.207419509720268, 2.97668775490289, -0.0696813125187982, 0.944447316071686, NA  
"21368", "AC002094.2", 0.364026197154943, 1.40568518917529, 2.5808230723278, 0.544665461281472, 0.585983623575459, NA  
"21369", "AC002094.4", 1.55910297504251, 0.0021415531363769, 1.21358650453233, 0.00176464811398193, 0.998592015245344, NA  
"21370", "SPAG5-AS1", 1.12173543998339, -0.665737754159737, 1.30219180381731, -0.511244005843196, 0.60918020814182, NA  
"21371", "AC005726.3", 2.12900912699197, -0.694011698269431, 1.04846725054412, -0.661929781697292, 0.508016224228231, NA  
"21372", "AC005726.2", 0.221450767245824, -0.774663427007578, 3.35247519753738, -0.231072082972194, 0.817258802814834, NA  
"21373", "AC010761.1", 0.201646305276721, -1.9490730241217, 3.3359781915796, -0.584258323103367, 0.559046527482917, NA  
"21374", "AC010761.2", 0.102686272020481, -0.0533240139618846, 3.35247519753738, -0.0159058638229612, 0.987309491940711, NA  
"21375", "AC010761.4", 0, NA, NA, NA, NA, NA  
"21376", "AC024267.4", 0, NA, NA, NA, NA, NA  
"21377", "AC024267.5", 0, NA, NA, NA, NA, NA  
"21378", "PIPOX", 1.71659953305945, 0.858873815263258, 1.15527797571042, 0.743434769225225, 0.457218500492215, NA  
"21379", "SEZ6", 1.77056459682877, 0.500101642022116, 1.18537577963372, 0.421892914141242, 0.673103182307818, NA  
"21380", "CRYBA1", 0.221906102043421, 0.695830468846429, 3.33747149841039, 0.208490310457437, 0.834846147549618, NA  
"21381", "AC068025.2", 0.439657248658977, -1.50832565035379, 2.39823821350385, -0.628930704990358, 0.529394423116454, NA  
"21382", "AC104564.3", 1.51562972628451, 1.0851333837302, 1.21365518728386, 0.894103527179497, 0.371266502294302, NA  
"21383", "AC104564.2", 0.544635356725203, 1.0128481360103, 2.348222551876, 0.431325444515953, 0.666231751785404, NA  
"21384", "AC023389.1", 0.204917209243366, -0.774663427007578, 3.35247519753738, -0.231072082972194, 0.817258802814834, NA  
"21385", "AC104982.2", 0.11921983002294, -0.0533240139618846, 3.35247519753738, -0.0159058638229612, 0.987309491940711, NA  
"21386", "EFCAB5", 1.79393192608506, 1.61768979036225, 1.26394257199118, 1.27987602143489, 0.200588741992835, NA  
"21387", "AC104984.5", 0.286402220682214, 1.17253773374183, 2.71767620516714, 0.431448651429658, 0.666142181249859, NA  
"21388", "SLC6A4", 0.404360590101272, 1.67914061260049, 2.1367544193084, 0.785836967237428, 0.431963006206044, NA

"21389","AC104984.1",0.826416301209961,-2.89194064397154,2.03692897704  
07,-1.41975526715371,0.155678942081728,NA  
"21390","AC127024.2",0.102230937222884,-1.35173207482145,3.35247519753  
738,-0.403204198442509,0.686798011343181,NA  
"21391","AC127024.4",0.49085640397336,1.86161988668208,2.7633179639403  
,0.673690075110841,0.500508373050457,NA  
"21392","AC127024.6",2.23479195850743,-1.44216495971263,1.095108975196  
87,-1.31691456501246,0.187867263754503,NA  
"21393","AC130324.2",0.23843966004588,0.69583062743856,3.3374714942975  
1,0.208490358233014,0.834846110249776,NA  
"21394","AC130324.1",1.46055536976585,-0.163892727086395,1.28199341329  
599,-0.127842097616577,0.898273934300797,NA  
"21395","AC130324.3",0.776098229058403,0.320928209624205,1.75145664256  
232,0.18323502953216,0.854613610043149,NA  
"21396","AC138207.9",0.102230937222884,-1.35173207482145,3.35247519753  
738,-0.403204198442509,0.686798011343181,NA  
"21397","AC138207.4",0.655754649741512,-0.984940973386637,1.9725480566  
3357,-0.499324196474878,0.61755101179855,NA  
"21398","AC138207.7",0.48040694840627,-0.551008202995232,2.11580640193  
298,-0.260424678974331,0.794536208455672,NA  
"21399","AC138207.2",1.10789237261889,0.338256453455016,1.442887795658  
93,0.234430185405056,0.814651026895099,NA  
"21400","AC003101.2",0.311841710803895,0.171849028305229,2.65045670284  
036,0.064837515784003,0.948303371003042,NA  
"21401","AC116407.1",0.283277640696212,0.104018403410582,2.73562877508  
445,0.0380235814003566,0.969668880382376,NA  
"21402","RHBDL3",1.81441033497258,0.552543661056619,1.14176845039815,0  
.483936704385151,0.628430790418857,NA  
"21403","AC079336.5",0.888612811455096,1.72721305640088,1.946162865505  
94,0.88749666691018,0.374811559898644,NA  
"21404","AC079336.2",0.204917209243366,-0.774663427007578,3.3524751975  
3738,-0.231072082972194,0.817258802814834,NA  
"21405","AC084809.1",0.100823152638361,-1.35173207482145,3.35247519753  
738,-0.40320419844251,0.686798011343181,NA  
"21406","AC084809.2",0,NA,NA,NA,NA,NA  
"21407","ASIC2",0.102686272020481,-0.0533240139618846,3.35247519753738  
, -0.0159058638229612,0.987309491940711,NA  
"21408","AC024610.2",0.219614265997676,-1.35173207482145,3.35247519753  
738,-0.40320419844251,0.686798011343181,NA  
"21409","CCL7",0.305740361881726,-1.38485840137887,2.64966120810703,-0  
.52265489532839,0.601214431685811,NA  
"21410","CCL11",0.493278998005496,-1.20446705642703,2.37941238571071,-  
0.506203575160119,0.612713745475208,NA  
"21411","TMEM132E",0.0644961186387932,-0.0533240139618838,3.3524751975  
3738,-0.015905863822961,0.987309491940711,NA  
"21412","AC022903.2",0.204917209243366,-0.774663427007578,3.3524751975  
3738,-0.231072082972194,0.817258802814834,NA  
"21413","AC004223.4",0.398405565159745,0.567409957533627,2.50548302096  
28,0.226467293047384,0.82083799480815,NA  
"21414","AC004223.2",0.855152557056757,-0.861992757386906,1.8519598145

4297,-0.465448953383273,0.641609984483433,NA  
"21415","UNC45B",0,NA,NA,NA,NA,NA  
"21416","AC022916.1",1.28478682120367,-0.336266312512246,1.21027708586  
873,-0.277842418433358,0.781133327443262,NA  
"21417","AC060766.6",0,NA,NA,NA,NA,NA  
"21418","AC015911.3",0.270796174825259,-2.10201442494854,3.17084321545  
501,-0.662919697417743,0.507381985665671,NA  
"21419","AC015911.6",0,NA,NA,NA,NA,NA  
"21420","RASL10B",1.18452721511652,-0.137323727741641,1.42665919912796  
, -0.0962554531773106,0.923317689959237,NA  
"21421","AC006237.1",0.102686272020481,-0.0533240139618846,3.352475197  
53738,-0.0159058638229612,0.987309491940711,NA  
"21422","C17orf50",0,NA,NA,NA,NA,NA  
"21423","AC015849.3",1.35578428339281,0.243929863056215,1.340366303967  
5,0.18198746293023,0.855592564739047,NA  
"21424","AC015849.4",1.64653480674427,-0.585195698850705,1.34835967914  
704,-0.434005635069786,0.664284349031732,NA  
"21425","HEATR9",0.287785067625315,-0.774666036310719,3.12039593109626  
, -0.248258891953677,0.803934102976972,NA  
"21426","AC015849.1",0,NA,NA,NA,NA,NA  
"21427","RDM1",0,NA,NA,NA,NA,NA  
"21428","CCL16",0,NA,NA,NA,NA,NA  
"21429","CCL14",1.98288049636295,-1.11125154834147,1.62926672246819,-0  
.682056248382723,0.495203384341813,NA  
"21430","AC244100.2",0,NA,NA,NA,NA,NA  
"21431","CCL23",0,NA,NA,NA,NA,NA  
"21432","AC243829.4",0.899265791388767,-1.33747385780917,1.64253236627  
107,-0.814275496345648,0.415487143948007,NA  
"21433","AC243829.2",0,NA,NA,NA,NA,NA  
"21434","TBC1D3I",0,NA,NA,NA,NA,NA  
"21435","AC243830.2",0.519008242125786,-0.453226781999053,2.0934800169  
1286,-0.216494439085883,0.828602359353358,NA  
"21436","AC243830.1",0,NA,NA,NA,NA,NA  
"21437","AC243773.2",0.309978591421774,-0.935659917707259,2.6791183829  
7866,-0.349241722072388,0.726907846061335,NA  
"21438","AC244093.4",1.20061425610229,1.61444968096218,1.4810794261045  
7,1.09004936028879,0.275691401366092,NA  
"21439","AC244093.3",0.142120095111522,-0.0533240139618842,3.352475197  
53738,-0.0159058638229611,0.987309491940711,NA  
"21440","AC243585.2",0,NA,NA,NA,NA,NA  
"21441","TBC1D3D",0.102230937222884,-1.35173207482145,3.35247519753738  
, -0.403204198442509,0.686798011343181,NA  
"21442","AC244153.1",1.00803751649817,-1.78403612695998,1.809791041532  
11,-0.985769122522383,0.324246421068481,NA  
"21443","SRCIN1",0.183715948661733,0.576034712544328,3.34068880739852,  
0.172429922616139,0.863099549623161,NA  
"21444","AC006449.3",0.578425517847577,0.963269338406052,2.00117742469  
643,0.481351291753742,0.630266848524788,NA  
"21445","AC006449.5",0.270796174825259,-2.10201442494854,3.17084321545  
501,-0.662919697417743,0.507381985665671,NA

"21446", "AC006441.1", 0.464739865539236, 0.570931429800267, 2.40207166486  
069, 0.237682929344816, 0.812127024707949, NA  
"21447", "AC006441.3", 0.219614265997676, -1.35173207482145, 3.35247519753  
738, -0.40320419844251, 0.686798011343181, NA  
"21448", "AC091178.2", 1.18882614236912, 1.55316809924658, 1.5417198736271  
2, 1.00742561979987, 0.313730284758997, NA  
"21449", "STAC2", 0.712305048773293, -2.62252222119333, 2.48519725759532, -  
1.05525716849168, 0.291307724401279, NA  
"21450", "AC005288.1", 1.18963394866795, 0.256080786418289, 1.495583299900  
34, 0.171224689681513, 0.864047094605919, NA  
"21451", "NEUR0D2", 0.269413327882159, -0.15046778595343, 2.76844275514859  
, -0.0543510555432646, 0.956655473192921, NA  
"21452", "AC087491.1", 0.287785067625315, -0.774666036310719, 3.1203959310  
9626, -0.248258891953677, 0.803934102976972, NA  
"21453", "TCAP", 1.10838659672734, 1.4774297372241, 1.56525886132379, 0.943  
888435152886, 0.345226662416526, NA  
"21454", "PNMT", 0, NA, NA, NA, NA, NA  
"21455", "GRB7", 0.855069282944574, 0.981666210449731, 1.85541740279204, 0.  
52908106228416, 0.596749217966687, NA  
"21456", "AC090844.2", 0.832402633455989, 0.63776664481964, 1.604313423815  
48, 0.397532449303368, 0.690974862641555, NA  
"21457", "GSDMA", 0, NA, NA, NA, NA, NA  
"21458", "CSF3", 0, NA, NA, NA, NA, NA  
"21459", "GJD3", 2.19364355430054, 1.03153403021424, 1.05130344170746, 0.98  
1195332661413, 0.326496425363873, NA  
"21460", "AC080112.1", 0.888470155439152, -2.02980804064427, 1.68560296226  
785, -1.20420293869994, 0.228511150433142, NA  
"21461", "TNS4", 0.0644961186387932, -0.0533240139618838, 3.35247519753738  
, -0.015905863822961, 0.987309491940711, NA  
"21462", "AC004585.1", 1.36879475385029, 0.199373341224576, 1.349449056743  
94, 0.147744251795351, 0.882544606959023, NA  
"21463", "KRT26", 0, NA, NA, NA, NA, NA  
"21464", "AC004231.1", 0.829329609245381, 1.5705249904695, 1.6931638136876  
7, 0.927568246954756, 0.353631575146344, NA  
"21465", "KRT23", 0.267550208500038, -1.3833228396413, 2.75673373075219, -0.  
.501797770386714, 0.615809781659427, NA  
"21466", "KRT40", 0.0534622507802646, -0.0533240139618838, 3.3524751975373  
8, -0.015905863822961, 0.987309491940711, NA  
"21467", "KRT36", 0.26007846453058, 0.946467962785628, 2.75713405316427, 0.  
343279631869694, 0.731388102297512, NA  
"21468", "KRT19", 0.310433926219371, 0.171794429070976, 2.65395493672705, 0.  
.0647314793079491, 0.948387798511658, NA  
"21469", "HAP1", 0.297557474879961, -0.207493288647577, 3.12446022598217, -  
0.0664093230959124, 0.947051947833083, NA  
"21470", "KLHL10", 0.286402220682214, 1.17253773374183, 2.71767620516714, 0.  
.431448651429658, 0.666142181249859, NA  
"21471", "ZNF385C", 1.63207553205309, -0.424420654740261, 1.23971995511147  
, -0.342352039257204, 0.732085977231052, NA  
"21472", "HSPB9", 1.4720585240914, 0.0777292824366996, 1.17528157496908, 0.  
0661367319050709, 0.947268967024773, NA

"21473", "HCRT", 0.742848071198967, -1.29547434437318, 1.80745967685033, -0.716737618529152, 0.47353600941455, NA  
"21474", "AC099811.4", 1.08963033169854, 0.277679943363991, 1.47393368345385, 0.188393783574649, 0.850567972439712, NA  
"21475", "AC099811.1", 0.783658884654792, 2.59694597290143, 1.63914951987857, 1.58432525001979, 0.113119722639951, NA  
"21476", "AC099811.5", 0.48729428008429, -0.678258967589844, 2.42660775520652, -0.279509107367919, 0.779854149762469, NA  
"21477", "AC107993.1", 1.33975718374409, 1.14008627472027, 1.74992882176789, 0.651504370085455, 0.514720957013891, NA  
"21478", "AC067852.5", 1.53064100628866, 0.424107602547959, 1.4550116135362, 0.291480561806118, 0.770683808217794, NA  
"21479", "WNK4", 0.142120095111522, -0.0533240139618842, 3.35247519753738, -0.0159058638229611, 0.987309491940711, NA  
"21480", "AOC2", 1.41807487163542, -0.0985631411893798, 1.71262026930636, -0.0575510771160611, 0.954106219842882, NA  
"21481", "LINC00671", 0.102230937222884, -1.35173207482145, 3.35247519753738, -0.403204198442509, 0.686798011343181, NA  
"21482", "PTGES3L", 0.324137039266305, -0.0524131773797337, 2.65349229594242, -0.0197525266833754, 0.984240788704199, NA  
"21483", "CCDC200", 0.580073722954633, -2.12584199281934, 2.22666083775644, -0.954721957099365, 0.339718323022432, NA  
"21484", "ETV4", 1.03560985222041, -1.32297861197207, 1.60952517101079, -0.821968264802744, 0.411094958829258, NA  
"21485", "LINC02594", 0.677668192041232, -1.06763561096771, 2.57849746384602, -0.41405338804377, 0.67883500824263, NA  
"21486", "CD300LG", 0.972879455921724, -1.96656073320949, 1.59839641023983, -1.23033355218461, 0.218572224907114, NA  
"21487", "PPY", 0.100823152638361, -1.35173207482145, 3.35247519753738, -0.40320419844251, 0.686798011343181, NA  
"21488", "NAGS", 0.20774765419889, -0.335374473295219, 3.34626863491525, -0.10022341595528, 0.920166956363588, NA  
"21489", "ASB16", 0.286402220682214, 1.17253773374183, 2.71767620516714, 0.431448651429658, 0.666142181249859, NA  
"21490", "RUNDC3A-AS1", 0.22202748838264, -0.774663427007578, 3.35247519753738, -0.231072082972193, 0.817258802814835, NA  
"21491", "RUNDC3A", 0.171420620199322, 0.765902268429694, 3.33569101336987, 0.22960827767316, 0.818396174063793, NA  
"21492", "ITGA2B", 1.67848197947546, 1.40787078656897, 1.24240458798157, 1.13318221792485, 0.25713774003718, NA  
"21493", "MEIOC", 1.13503569812517, 0.0111918435181395, 1.58194668600362, 0.00707472863476383, 0.994355230338958, NA  
"21494", "AC091152.2", 0.68644644101977, 0.476607139510156, 1.68583673755531, 0.282712512364216, 0.7773972239093, NA  
"21495", "ADAM11", 2.05452101532105, -0.873692705042146, 1.06694525019468, -0.818873044219213, 0.41285885071459, NA  
"21496", "HIGD1B", 0.102686272020481, -0.0533240139618846, 3.35247519753738, -0.0159058638229612, 0.987309491940711, NA  
"21497", "KIF18B", 0.204461874445769, -1.96013641505178, 3.33548947920397,



-0.587660799793491,0.556759992345141,NA  
"21498","AC015936.1",0,NA,NA,NA,NA,NA  
"21499","C1QL1",0.505561151882294,-0.895631803234423,2.10687693569295,  
-0.425099249064516,0.670764325312171,NA  
"21500","AC008105.1",0.102230937222884,-1.35173207482145,3.35247519753  
738,-0.403204198442509,0.686798011343181,NA  
"21501","MAP3K14-  
AS1",0.302935778684673,1.24376146070571,3.12847474347089,0.39756161154  
9346,0.690953362451962,NA  
"21502","SPATA32",0,NA,NA,NA,NA,NA  
"21503","AC091132.1",1.99043580174304,-1.36558541334314,1.102099833858  
54,-1.23907596334727,0.215317367632783,NA  
"21504","CRHR1",0.71325193553424,2.46344845579579,2.12464750822571,1.1  
5946219137922,0.246267839302965,NA  
"21505","WNT9B",0.102686272020481,-0.0533240139618846,3.35247519753738  
, -0.0159058638229612,0.987309491940711,NA  
"21506","AC002558.2",0.102686272020481,-0.0533240139618846,3.352475197  
53738,-0.0159058638229612,0.987309491940711,NA  
"21507","MYL4",1.31250665327804,-0.360994087915343,1.33364913682893,-0  
.270681454324405,0.786636041803579,NA  
"21508","AC068234.3",1.14591269241737,-0.935162844608587,1.55450938928  
525,-0.601580698742879,0.547453279917561,NA  
"21509","AC040934.1",0.0644961186387932,-0.0533240139618838,3.35247519  
753738,-0.015905863822961,0.987309491940711,NA  
"21510","AC015674.1",0.102230937222884,-1.35173207482145,3.35247519753  
738,-0.403204198442509,0.686798011343181,NA  
"21511","LRRC46",0.87256390340467,1.05367593564624,1.7178118755196,0.6  
13382612300041,0.539623380306906,NA  
"21512","SP6",0.324574583169373,1.31799784995945,2.58063261725584,0.51  
0726649406209,0.609542477387077,NA  
"21513","AC018521.7",0.476168718866222,-0.806164721328749,2.4009415481  
3908,-0.335770240618141,0.737044133139428,NA  
"21514","AC018521.4",0,NA,NA,NA,NA,NA  
"21515","AC004477.1",0.545320289615624,-0.364640110280917,2.0687511587  
624,-0.176260981769822,0.86008891410389,NA  
"21516","AC004477.3",0.428522315793736,1.66405784528808,2.175009556805  
63,0.765080705085282,0.444223488631033,NA  
"21517","SKAP1-AS1",0,NA,NA,NA,NA,NA  
"21518","THRA1/  
BTR",0.219614265997676,-1.35173207482145,3.35247519753738,-0.403204198  
44251,0.686798011343181,NA  
"21519","HOXB-AS2",0,NA,NA,NA,NA,NA  
"21520","HOXB8",0.754097933864305,-2.72175285589399,2.06140819643593,-  
1.32033668081837,0.186722633964038,NA  
"21521","HOXB9",0,NA,NA,NA,NA,NA  
"21522","AC103702.2",0,NA,NA,NA,NA,NA  
"21523","LINC02086",0,NA,NA,NA,NA,NA  
"21524","HOXB13",2.07320415913571,-0.574401064885226,1.16759797014111,  
-0.491951064984987,0.622753937597477,NA  
"21525","AC091133.1",0,NA,NA,NA,NA,NA

"21526", "NGT2", 0.466582449020117, 0.836424183292662, 2.37438555258327, 0.352269740852598, 0.724635978838535, NA  
"21527", "PH0SPH01", 0.204917209243366, -0.774663427007578, 3.35247519753738, -0.231072082972194, 0.817258802814834, NA  
"21528", "AC004797.1", 0.220644641439539, 0.945449760607245, 2.90117912387055, 0.325884655941509, 0.744511625317288, NA  
"21529", "AC091180.2", 0.203054089861245, -1.95461545718866, 3.33573296423696, -0.585962808817275, 0.557900507779092, NA  
"21530", "FLJ45513", 0.935670242922201, 0.814090011692289, 1.54601834141246, 0.526572026919504, 0.598490821726813, NA  
"21531", "DLX4", 1.4250642599727, -1.83156757249367, 1.50616298892467, -1.21604871847324, 0.22396636385533, NA  
"21532", "ITGA3", 1.68668284771332, -0.745896694750199, 1.1862412897039, -0.628790028828269, 0.529486528785305, NA  
"21533", "AC002401.4", 0, NA, NA, NA, NA, NA  
"21534", "SAMD14", 0.654200326607615, -0.348671934105583, 1.98366844893358, -0.175771275836458, 0.86047363682651, NA  
"21535", "AC015909.2", 0.117958369419058, 0.451348601316665, 3.34428110054629, 0.134961322851401, 0.892642454377335, NA  
"21536", "AC015909.1", 0.224882870979587, 1.01003906181063, 3.32983728260984, 0.30332985511435, 0.7616384958927, NA  
"21537", "TMEM92-AS1", 0.59197846768877, 0.204799435386143, 2.049863837098, 0.0999087996381645, 0.920416730207931, NA  
"21538", "EME1", 1.79118146042434, -0.838324129255631, 1.11145789992222, -0.754256305447377, 0.450695333924179, NA  
"21539", "AC021491.4", 0.480121447191881, 0.774306247838734, 1.94835900054818, 0.39741456662806, 0.691061775492636, NA  
"21540", "AC021491.2", 0.102230937222884, -1.35173207482145, 3.35247519753738, -0.403204198442509, 0.686798011343181, NA  
"21541", "CACNA1G", 1.07839638746646, -2.05896367035859, 1.54360134246443, -1.33387009567598, 0.182246433586115, NA  
"21542", "ANKRD40CL", 0.0534622507802646, -0.0533240139618838, 3.35247519753738, -0.015905863822961, 0.987309491940711, NA  
"21543", "AC005921.4", 1.22728493018771, 1.25988343397635, 1.5716976735276, 0.80160673085976, 0.422780482885891, NA  
"21544", "WFIKN2", 2.21306559796726, 1.65374094249531, 1.23758214580864, 1.3362676151204, 0.181461817663548, NA  
"21545", "AC005920.1", 0.390016004848199, -1.51607450676223, 2.4718251233438, -0.613342138343241, 0.539650136358375, NA  
"21546", "TOM1L1", 1.69659901222397, -0.265096557195026, 1.09330568768988, -0.242472494362639, 0.808414067353807, NA  
"21547", "AC007638.2", 0, NA, NA, NA, NA, NA  
"21548", "AC007638.1", 0.206616213750315, 0.576034718369261, 3.3406888072366, 0.172429924368129, 0.863099548245903, NA  
"21549", "NOG", 1.04252636875704, -1.86421135687886, 1.50808039071717, -1.23614852918572, 0.216403358842981, NA  
"21550", "AC004584.3", 1.41025218654225, 0.144875083011093, 1.31509642196983, 0.11016308811341, 0.912280035470895, NA  
"21551", "OR4D1", 0, NA, NA, NA, NA, NA

"21552", "AC005962.1", 0.741032655662718, 1.19072066092066, 1.797757145386  
17, 0.662336770000647, 0.507755416659111, NA  
"21553", "LP0", 0.0644961186387932, -0.0533240139618838, 3.35247519753738,  
-0.015905863822961, 0.987309491940711, NA  
"21554", "AC005962.2", 0.11921983002294, -0.0533240139618846, 3.3524751975  
3738, -0.0159058638229612, 0.987309491940711, NA  
"21555", "MP0", 0.649288343572494, 1.20229893574448, 1.76874274534856, 0.67  
9747769372506, 0.496664183458153, NA  
"21556", "TSP0AP1-  
AS1", 2.30500885736788, 0.946513759218914, 1.11723285122668, 0.84719470805  
0049, 0.396886602701727, NA  
"21557", "RNF43", 0.203509424658842, -0.774663427007579, 3.35247519753738,  
-0.231072082972194, 0.817258802814834, NA  
"21558", "HSF5", 0.0644961186387932, -0.0533240139618838, 3.35247519753738  
, -0.015905863822961, 0.987309491940711, NA  
"21559", "SEPTIN4-  
AS1", 0.102686272020481, -0.0533240139618846, 3.35247519753738, -0.0159058  
638229612, 0.987309491940711, NA  
"21560", "TEX14", 0.206616213750315, 0.576034718369261, 3.3406888072366, 0.  
172429924368129, 0.863099548245903, NA  
"21561", "PPM1E", 0.376312891801265, -1.05915445348178, 2.53628384602384, -  
0.417600914480542, 0.676238928058225, NA  
"21562", "LINC01476", 0.155693188003149, -0.774663427007578, 3.35247519753  
738, -0.231072082972193, 0.817258802814835, NA  
"21563", "AC025048.4", 1.242820069881, -0.576047379345389, 1.4545217418610  
7, -0.396039029714558, 0.69207623568636, NA  
"21564", "AC025048.7", 0.0534622507802646, -0.0533240139618838, 3.35247519  
753738, -0.015905863822961, 0.987309491940711, NA  
"21565", "CA4", 1.96022031449917, -0.165276185779563, 1.20644150506457, -0.  
136994777687724, 0.891034922994869, NA  
"21566", "C17orf64", 0.45186781594001, 0.813382035851298, 2.12779214438352  
, 0.382265738689884, 0.702264265004406, NA  
"21567", "AC005856.1", 0.948451700401948, -2.26703211273909, 1.60923693671  
326, -1.40876216610423, 0.15890550585361, NA  
"21568", "AC005746.2", 0.439677569991484, 0.279268974458065, 2.42445800272  
399, 0.11518820872306, 0.908295944540891, NA  
"21569", "TBX4", 0.880322091249984, 1.79092575331969, 1.92093097091403, 0.9  
323217650385, 0.351170262863348, NA  
"21570", "AC018628.2", 0.347037304354888, -0.0545756175730095, 2.614005304  
4848, -0.0208781586936244, 0.983342849664216, NA  
"21571", "AC008026.3", 1.92633149155243, -0.166155150207198, 1.29290084664  
76, -0.128513451466929, 0.89774265376184, NA  
"21572", "AC080038.2", 1.02632870337678, 1.28975527751952, 1.8530364565192  
, 0.696022613576768, 0.486414668018255, NA  
"21573", "MARCH10", 0, NA, NA, NA, NA, NA  
"21574", "AC005972.3", 0, NA, NA, NA, NA, NA  
"21575", "AC005828.1", 0, NA, NA, NA, NA, NA  
"21576", "AC005828.3", 0.47105963315888, -1.20156472487464, 2.105154017460  
42, -0.570772834153089, 0.568153639878397, NA  
"21577", "CD79B", 2.03532781116197, 0.127259245717726, 1.11162272987732, 0.

114480607761386,0.908856818090001,NA  
"21578","SCN4A",0.226144331583469,0.885845475851209,3.33280882803988,0  
.265795466094045,0.790396735192843,NA  
"21579","PRR29-  
AS1",0.106924501560529,0.385965786494404,3.34626872025989,0.1153421373  
95477,0.908173940404949,NA  
"21580","PRR29",0.454417140713014,1.80077312122846,2.35936521947133,0.  
763244751752325,0.445317444238798,NA  
"21581","AC005803.1",0,NA,NA,NA,NA,NA  
"21582","AC103810.5",0.128992237277586,0.513744972953418,3.34245151459  
318,0.153703044220807,0.877843884367224,NA  
"21583","AC037487.1",0.168565237602375,-1.35173207482145,3.35247519753  
738,-0.40320419844251,0.686798011343181,NA  
"21584","AC037487.2",0.865647816005506,0.277895653781875,1.55662418915  
165,0.178524563422932,0.858311032218415,NA  
"21585","CACNG4",0,NA,NA,NA,NA,NA  
"21586","AC007448.5",0.922216855877244,1.08175022537333,1.457156095097  
56,0.742370861304944,0.45786266906757,NA  
"21587","AC007448.4",1.93916849062884,-0.352171742050112,1.22047542966  
418,-0.288552914290961,0.772923532277784,NA  
"21588","AC110921.1",0.274106892219803,1.20013018856317,2.698971314216  
08,0.444662076340649,0.65656397946606,NA  
"21589","AC134407.1",0.205372544040962,0.695830627438559,3.33747149429  
751,0.208490358233014,0.834846110249776,NA  
"21590","SLC16A6",2.00504077785404,-0.197064816637081,1.0645277961847,  
-0.185119465497629,0.853135334213457,NA  
"21591","LINC01482",0.300412857476909,1.32688035389808,3.0591219060212  
5,0.433745497780388,0.664473263463259,NA  
"21592","ABCA9-  
AS1",0.880339340337744,2.72764370114065,2.4117333755644,1.130988909792  
86,0.258059759273903,NA  
"21593","LINC01483",0.142120095111522,-0.0533240139618842,3.3524751975  
3738,-0.0159058638229611,0.987309491940711,NA  
"21594","LINC01028",1.08796229223467,-0.122084989519841,2.032660943812  
75,-0.0600616595165352,0.952106526081653,NA  
"21595","KCNJ16",1.56490779752557,-1.81618058154868,1.60455167708404,-  
1.13189285673194,0.25767948221718,NA  
"21596","KCNJ2-  
AS1",0.33713047520475,-2.38103637458962,3.31815804257558,-0.7175777476  
6552,0.473017682228765,NA  
"21597","KCNJ2",0.542047684448116,-2.13038904887253,2.26539405107142,-  
0.940405510407763,0.347009596762923,NA  
"21598","AC007423.1",0.437953627843111,-2.71106454329426,2.72059567552  
49,-0.99649667449067,0.319008882057056,NA  
"21599","LINC01152",0.704437146963897,0.635781683327011,1.976488237755  
25,0.321672383969805,0.74770090116306,NA  
"21600","LINC00511",1.04552473152618,0.102325456628817,1.5231883819057  
9,0.0671784644922178,0.946439629234084,NA  
"21601","AC011120.1",0,NA,NA,NA,NA,NA  
"21602","AC097641.2",0.773982001980893,-0.374461560599058,1.7542203561

03,-0.213463239835459,0.8309656586858,NA  
"21603","CPSF4L",0,NA,NA,NA,NA,NA  
"21604","SDK2",1.20138395017409,-0.330396284646919,1.38247478500112,-0.238989013204065,0.811114102121492,NA  
"21605","AC100786.2",0,NA,NA,NA,NA,NA  
"21606","DNAI2",0,NA,NA,NA,NA,NA  
"21607","KIF19",0,NA,NA,NA,NA,NA  
"21608","GPRC5C",0.195582345891787,0.494635591052761,3.34300496985029,0.147961368742719,0.882373255878367,NA  
"21609","CD300LB",1.7107178052192,-3.56044264777423,1.41983509864427,-2.50764518441186,0.0121538640779663,NA  
"21610","CD300C",0.812724174135021,-1.05664034590458,1.68782294410199,-0.626037434552573,0.531290387860338,NA  
"21611","AC064805.1",0.346581969557291,-1.38612727586565,2.96955222737921,-0.466779894654011,0.640657361748092,NA  
"21612","AC064805.2",1.27206204084752,0.829515232168784,1.87596424960805,0.442180725108219,0.658358432816704,NA  
"21613","CD300LF",0.322875578662423,0.229521205917847,2.32264188371235,0.098819024804201,0.921281962818188,NA  
"21614","GRIN2C",0.710451742991687,-0.947394903355239,1.94015671944591,-0.488308441199433,0.625331383329179,NA  
"21615","HID1",0.549019910245892,1.13525852258033,1.84471226121945,0.615412249620906,0.53828250373754,NA  
"21616","HID1-AS1",0,NA,NA,NA,NA,NA  
"21617","AC022211.3",0,NA,NA,NA,NA,NA  
"21618","AC022211.1",0.268005543297635,-0.150415693622294,2.77274999608506,-0.0542478383679276,0.956737707263394,NA  
"21619","AC011933.2",0.786481258746374,0.800486837995863,1.80699862537438,0.442992499692697,0.657771159770625,NA  
"21620","LLGL2",1.88299244703939,0.501152002444146,1.31170735091628,0.382060832466993,0.702416243142566,NA  
"21621","SMIM5",0.488048525958936,-0.187009959778483,2.14782079279056,-0.0870696290892643,0.930616166155186,NA  
"21622","AC087749.1",0,NA,NA,NA,NA,NA  
"21623","AC087289.5",0.954553049324117,-1.25238250526073,1.47441313395781,-0.849410844502535,0.395652720904137,NA  
"21624","AC087289.2",1.30176494260047,-1.25289809778779,1.30574435723907,-0.959527866876624,0.337292888040669,NA  
"21625","EVPL",0.11921983002294,-0.0533240139618846,3.35247519753738,-0.0159058638229612,0.987309491940711,NA  
"21626","ZACN",0.674581724282265,-0.479307252025797,1.86969068678899,-0.256356441957231,0.797675618515402,NA  
"21627","GALR2",0.274106892219803,1.20013018856317,2.69897131421608,0.444662076340649,0.65656397946606,NA  
"21628","FOXJ1",0.498773383000509,-0.867489772519342,2.36847805713075,-0.366264644043292,0.71416760927967,NA  
"21629","RNF157-AS1",0,NA,NA,NA,NA,NA  
"21630","RNF157",2.34494221717502,0.625493907780857,1.27308824930207,0.491320148562965,0.62320003140042,NA  
"21631","QRICH2",1.79208970612887,0.338976682436233,1.10085380026686,0

.307921617161208,0.758141976348893,NA  
"21632","AC015802.3",1.24212449284294,1.36722257495812,1.4033213078108  
4,0.974276216963425,0.329919410129681,NA  
"21633","AC015802.5",0.83254895743663,0.70906919715485,1.5760844587403  
6,0.449892893253674,0.652787672176707,NA  
"21634","ST6GALNAC2",0,NA,NA,NA,NA,NA  
"21635","ST6GALNAC1",0.168565237602375,-1.35173207482145,3.35247519753  
738,-0.40320419844251,0.686798011343181,NA  
"21636","AC005837.1",1.27476340030531,0.257990388097974,1.323226396397  
02,0.194970708565404,0.845415878723006,NA  
"21637","AC005837.4",0.788851967164118,-0.607036042605997,1.7409070996  
1234,-0.34868950947536,0.727322420791145,NA  
"21638","LINC02080",0.44255074348296,1.78093897327276,2.10852181066223  
,0.844638629900353,0.398312633865237,NA  
"21639","LINC00868",0.501547171977823,1.97923795716875,2.6681276962334  
2,0.741807807760787,0.458203789326262,NA  
"21640","MGAT5B",2.31066018978286,0.0801544142270573,1.01957042964212,  
0.0786158679152672,0.937338165832093,NA  
"21641","AC111182.1",1.10396990779189,1.29072314552416,1.6562015789936  
4,0.779327324581133,0.435786922551313,NA  
"21642","AC111170.1",0,NA,NA,NA,NA,NA  
"21643","AC021683.5",0.0644961186387932,-0.0533240139618838,3.35247519  
753738,-0.015905863822961,0.987309491940711,NA  
"21644","LINC01973",0.347037304354888,-0.0545756175730095,2.6140053044  
848,-0.0208781586936244,0.983342849664216,NA  
"21645","TNRC6C-  
AS1",1.424141222429,1.25219838790648,1.25809144958459,0.99531587176746  
6,0.319582660741346,NA  
"21646","C17orf99",0,NA,NA,NA,NA,NA  
"21647","TK1",1.94365046935859,-0.413402191303587,1.09056617107567,-0.  
379071167131317,0.704635016589996,NA  
"21648","BIRC5",0.895188253494768,-0.63031797029699,1.66112494020624,-  
0.379452475271807,0.704351889269108,NA  
"21649","LINC01993",0.209155438783414,-0.335374473295219,3.34626863491  
525,-0.10022341595528,0.920166956363588,NA  
"21650","AC061992.2",2.25332121287636,0.15579420156679,1.0599405227061  
,0.146983909218828,0.883144720953509,NA  
"21651","DNAH17",0,NA,NA,NA,NA,NA  
"21652","SCAT1",0.221450767245824,-0.774663427007578,3.35247519753738,  
-0.231072082972194,0.817258802814834,NA  
"21653","AC022966.2",0.759926632001453,1.65892682353636,1.910665493964  
78,0.868245555685395,0.385259920092006,NA  
"21654","AC100788.1",0.648729413330208,1.32391446463085,2.265594475694  
26,0.584356326268475,0.558980603592743,NA  
"21655","RBF0X3",0,NA,NA,NA,NA,NA  
"21656","CBX2",1.93759387128929,0.394119834697167,1.21631226259981,0.3  
24028497299497,0.745916459444016,NA  
"21657","LINC01979",0.102686272020481,-0.0533240139618846,3.3524751975  
3738,-0.0159058638229612,0.987309491940711,NA  
"21658","AC116025.1",1.39536205976417,-1.05850086180429,1.157948467428

13,-0.914117416775274,0.360655151694804,NA  
"21659","AC087741.2",0.920223695631501,-1.18296645007492,1.81918318915  
063,-0.650273406839935,0.515515631601206,NA  
"21660","CARD14",1.14720556574622,0.129682454341876,1.54541225046829,0  
.0839144728551101,0.933124432473137,NA  
"21661","AC124319.1",0.630770279848696,1.307862394981,1.79921791261042  
,0.726906055022244,0.467283507669319,NA  
"21662","AC124319.2",0.659469146158258,0.539430195979037,1.75536123947  
936,0.307304379205178,0.758611702736138,NA  
"21663","AC120024.1",0,NA,NA,NA,NA,NA  
"21664","NPTX1",0.618706036548305,-0.361557455039009,1.87108128030383,  
-0.193234499668714,0.846775321043537,NA  
"21665","AC016245.1",0.341125932066361,1.37790492328387,3.032905404719  
36,0.454318463457443,0.649599628836418,NA  
"21666","AC016245.2",0,NA,NA,NA,NA,NA  
"21667","AC127496.1",0.828420212150651,0.793867356298,1.79372535043613  
,0.442580217815942,0.658069396046438,NA  
"21668","AC127496.5",2.08528850195104,-0.000700830144975167,1.07983769  
387591,-0.000649014337015448,0.99948216151711,NA  
"21669","AC027601.2",0.167182390659274,0.576034712544328,3.34068880739  
852,0.172429922616139,0.863099549623161,NA  
"21670","AC027601.4",1.57204212786697,0.987956159707765,1.255392639647  
36,0.786969851906477,0.431299514781601,NA  
"21671","LINC00482",1.24953588748326,-0.98387953018411,1.3466957038740  
8,-0.730587858380891,0.465030930443727,NA  
"21672","AC110285.5",1.28673393738778,-2.04846377123145,1.333900490026  
18,-1.53569459382329,0.124613301614726,NA  
"21673","LINC01971",0.787135171762639,-1.20484627544767,1.703256512385  
63,-0.707378052974611,0.479331571932077,NA  
"21674","FSCN2",0.423673793659361,-1.96577570544734,2.40428763865595,-  
0.817612532644492,0.413578469008651,NA  
"21675","PDE6G",0.660553082024309,0.0645176749322855,1.99457285440211,  
0.0323466123535635,0.974195637352363,NA  
"21676","AC139530.3",1.77214990615112,0.699359179207823,1.177271472437  
89,0.594050901241658,0.552478068666525,NA  
"21677","PPP1R27",0.167182390659274,0.576034712544328,3.34068880739852  
,0.172429922616139,0.863099549623161,NA  
"21678","AC145207.3",0.274913018026089,-0.226100793799534,2.7407223210  
9206,-0.0824967900102491,0.934251670836265,NA  
"21679","AC145207.2",1.86617356053758,-0.275594861172091,1.10667780448  
771,-0.249028994757572,0.80333835320312,NA  
"21680","AC145207.6",0.429225039578686,0.175903833931608,2.42785326770  
701,0.0724524155851234,0.942241872755202,NA  
"21681","DCXR-  
DT",0.242943247749883,-0.774663951729422,3.30711343151841,-0.234241724  
020258,0.814797324817481,NA  
"21682","AC129510.2",0.0644961186387932,-0.0533240139618838,3.35247519  
753738,-0.015905863822961,0.987309491940711,NA  
"21683","AC132872.2",0.740339088956208,0.367282593036872,1.65713449657  
359,0.221637165719675,0.824596347894433,NA

"21684", "AC132872.3", 0.102686272020481, -0.0533240139618846, 3.35247519753738, -0.0159058638229612, 0.987309491940711, NA  
"21685", "AC132872.5", 0.273505233441565, -0.226106766776126, 2.74490218220006, -0.082373342205914, 0.934349833830783, NA  
"21686", "LINC01970", 1.70474686184441, -1.52491757518746, 1.13140162902839, -1.34781278023879, 0.177718606304864, NA  
"21687", "AC132938.1", 0.733456551869177, 1.56002834538682, 1.75709161532029, 0.887846900972467, 0.374623110462313, NA  
"21688", "AC132938.2", 0.160386752340794, 0.715986771710925, 3.33695183420161, 0.214563112470645, 0.830107956063492, NA  
"21689", "NARF-AS1", 0, NA, NA, NA, NA, NA  
"21690", "NARF-IT1", 0.203054089861245, -1.95461545718866, 3.33573296423696, -0.585962808817275, 0.557900507779092, NA  
"21691", "AC124283.3", 0.102686272020481, -0.0533240139618846, 3.35247519753738, -0.0159058638229612, 0.987309491940711, NA  
"21692", "AC024361.1", 0.68644644101977, 0.476607139510156, 1.68583673755531, 0.282712512364216, 0.7773972239093, NA  
"21693", "ZNF750", 0, NA, NA, NA, NA, NA  
"21694", "AC087222.1", 0.441520368041097, -0.0650811968767756, 2.44233317234728, -0.0266471411900889, 0.978741173360975, NA  
"21695", "AP005530.1", 0, NA, NA, NA, NA, NA  
"21696", "AP000845.1", 0.677675846909195, -0.297255097390483, 1.78768801028932, -0.166279068651568, 0.867937337528032, NA  
"21697", "AP001178.2", 0.428522315793736, 1.66405784528808, 2.17500955680563, 0.765080705085282, 0.444223488631033, NA  
"21698", "AP001020.3", 2.02563738335609, 0.875250588945929, 1.14662983672468, 0.763324449541678, 0.445269924327675, NA  
"21699", "AP001020.1", 0.362764736551061, 1.46681914601225, 2.23095446981539, 0.657485020809783, 0.510869099430787, NA  
"21700", "LINC00470", 0.30528502708413, -2.35094355977522, 3.02528291170748, -0.777098746922923, 0.437100513227499, NA  
"21701", "AP005136.4", 0.955404434104332, -0.131228907862076, 1.53111069255212, -0.0857083086810257, 0.931698297063973, NA  
"21702", "AP005136.3", 0.413232427500631, 1.63868990607566, 2.84045355556949, 0.576911353773963, 0.563999340349871, NA  
"21703", "AP000919.2", 1.06109482388865, 2.10481746707895, 1.61954298076277, 1.29963668274344, 0.193725520913281, NA  
"21704", "AP000919.3", 0.424960191904666, -0.699145451204289, 2.21059536464168, -0.316270205930525, 0.751797423586746, NA  
"21705", "AP005329.2", 0.362053593518754, 0.143931775625763, 2.98640704900717, 0.0481956321639453, 0.96156033117261, NA  
"21706", "AP005329.1", 1.11179891785357, -0.805915026828412, 1.44808561991008, -0.556538243145081, 0.577842958374258, NA  
"21707", "AP005671.1", 0.683331960773673, 1.35172912403494, 2.02943060450594, 0.666063240119519, 0.505370679440478, NA  
"21708", "AP005059.1", 0.0534622507802646, -0.0533240139618838, 3.35247519753738, -0.015905863822961, 0.987309491940711, NA  
"21709", "AP001021.1", 0.171420620199322, 0.765902268429694, 3.33569101336987, 0.22960827767316, 0.818396174063793, NA



"21710", "L3MBTL4-  
AS1", 0.510202236327495, -2.14964618719501, 2.26812517576353, -0.947763470  
096561, 0.343249881156763, NA  
"21711", "AP005210.2", 0.23843966004588, 0.69583062743856, 3.3374714942975  
1, 0.208490358233014, 0.834846110249776, NA  
"21712", "AP001095.1", 0.972138984593494, 0.0626665730560667, 1.4900052689  
9703, 0.0420579539951892, 0.966452498342952, NA  
"21713", "AP000897.2", 0, NA, NA, NA, NA, NA  
"21714", "AP005900.1", 0.102230937222884, -1.35173207482145, 3.35247519753  
738, -0.403204198442509, 0.686798011343181, NA  
"21715", "AC006566.2", 1.90478115105857, -0.670276221860007, 1.17139205399  
978, -0.572204856240326, 0.56718319790425, NA  
"21716", "AC006566.1", 1.02020092974399, -0.60864877857517, 1.388087975066  
97, -0.438479973537561, 0.661038384338053, NA  
"21717", "AP000864.1", 0.102686272020481, -0.0533240139618846, 3.352475197  
53738, -0.0159058638229612, 0.987309491940711, NA  
"21718", "AP005899.1", 0.443356869289245, 0.631510007619988, 2.47802647528  
698, 0.254843930812666, 0.798843643306955, NA  
"21719", "AP001033.1", 0.557615618078035, -0.48532922706255, 1.88814560501  
581, -0.257040148690485, 0.797147779841651, NA  
"21720", "AP005432.1", 1.15288278062798, 0.468502268131983, 1.532981674311  
36, 0.305615048100586, 0.759897761623734, NA  
"21721", "PPP4R1-  
AS1", 0.993193921194485, -0.615136092679146, 1.59776074266306, -0.38499887  
7650399, 0.700238247067711, NA  
"21722", "AC006238.1", 0.296405498530148, -0.22601836373236, 2.68538977137  
194, -0.0841659434849525, 0.932924495242752, NA  
"21723", "AP001120.5", 0, NA, NA, NA, NA, NA  
"21724", "CHMP1B-  
AS1", 0.102686272020481, -0.0533240139618846, 3.35247519753738, -0.0159058  
638229612, 0.987309491940711, NA  
"21725", "AP001269.2", 0.589850746518195, -1.42501090271909, 1.84580423564  
594, -0.772027106233402, 0.440098373308005, NA  
"21726", "AP001542.3", 0.392296346800881, -0.225649830609692, 2.4811969181  
2893, -0.0909439428047712, 0.927537133531743, NA  
"21727", "AP001029.2", 1.20402196091961, -0.616389206436005, 1.30518231958  
714, -0.472262914679219, 0.636739137533092, NA  
"21728", "AP005482.1", 0.481529231776404, 0.774223947037295, 1.94721831782  
938, 0.39760510670439, 0.69092129562919, NA  
"21729", "AP002449.1", 0.979325227348563, -0.306089118108561, 1.5019023377  
1309, -0.203800946587936, 0.838509053096421, NA  
"21730", "LDLRAD4-  
AS1", 0.322300538018157, -0.774667165166207, 3.0144598883595, -0.256983736  
342828, 0.797191328075268, NA  
"21731", "AP005131.4", 0.205372544040962, 0.695830627438559, 3.33747149429  
751, 0.208490358233014, 0.834846110249776, NA  
"21732", "AP005131.6", 1.46685221260245, 1.27631723128645, 1.298875824643,  
0.982632217084533, 0.325788482232754, NA  
"21733", "AP005131.1", 0.542772237343082, 0.0163738041147164, 2.3704581394  
8868, 0.0069074428448875, 0.994488701826018, NA

"21734", "AP005131.7", 0.464849349793304, 0.639815315539654, 2.19806742220  
542, 0.291080841777682, 0.770989491882198, NA  
"21735", "AP005131.3", 0, NA, NA, NA, NA, NA  
"21736", "AC006557.3", 0.269868662679755, 1.13857476503723, 3.232474371463  
12, 0.352230098121977, 0.724665706448339, NA  
"21737", "AP005901.6", 0.296405498530148, -0.22601836373236, 2.68538977137  
194, -0.0841659434849525, 0.932924495242752, NA  
"21738", "AP005901.5", 0.570633991657902, -0.801882134999383, 2.0814267460  
6955, -0.385255996404204, 0.700047759843299, NA  
"21739", "AC015878.2", 0.102686272020481, -0.0533240139618846, 3.352475197  
53738, -0.0159058638229612, 0.987309491940711, NA  
"21740", "AC106037.3", 0, NA, NA, NA, NA, NA  
"21741", "MIR133A1HG", 1.33033615945505, -0.367920744302017, 1.17988093138  
211, -0.311828706199221, 0.755170706649623, NA  
"21742", "AC091588.3", 0, NA, NA, NA, NA, NA  
"21743", "AC091588.2", 0, NA, NA, NA, NA, NA  
"21744", "AC027449.1", 0.154285403418625, -0.774663427007578, 3.3524751975  
3738, -0.231072082972193, 0.817258802814835, NA  
"21745", "AC090912.1", 0.645050114032446, 1.13318966122988, 1.983815296964  
92, 0.57121732197729, 0.567852337718508, NA  
"21746", "AC090912.2", 1.58980527405276, 0.425932330761007, 1.389961749273  
19, 0.306434569860449, 0.759273790569045, NA  
"21747", "AC090912.3", 0.570057055952354, 0.21425242749141, 1.853352264435  
48, 0.115602646945625, 0.907967465014804, NA  
"21748", "AC011731.1", 0.824788417435412, 0.295114072410681, 1.66259779265  
454, 0.177501782881291, 0.859114264933371, NA  
"21749", "AC010754.1", 0, NA, NA, NA, NA, NA  
"21750", "TTC39C-AS1", 0, NA, NA, NA, NA, NA  
"21751", "AC090772.2", 0, NA, NA, NA, NA, NA  
"21752", "CABYR", 1.24469030232432, 0.835281762014008, 1.4237467227815, 0.5  
86678619622852, 0.557419569695535, NA  
"21753", "AC090772.3", 1.1777332421493, 1.25317800780991, 1.498236790564, 0  
.836435212179086, 0.402910110196379, NA  
"21754", "AC023983.2", 0.474305599484101, -1.97441555239015, 2.07795404124  
892, -0.950172868695141, 0.342024422114431, NA  
"21755", "HRH4", 0.155693188003149, -0.774663427007578, 3.35247519753738, -  
0.231072082972193, 0.817258802814835, NA  
"21756", "AC018697.1", 1.03287345278033, -1.26383209127962, 1.546977801386  
71, -0.816968472428448, 0.413946445474179, NA  
"21757", "PSMA8", 0.0534622507802646, -0.0533240139618838, 3.3524751975373  
8, -0.015905863822961, 0.987309491940711, NA  
"21758", "AC121320.1", 0.543373896121321, 1.05664133621783, 1.875954396593  
85, 0.563255342526643, 0.573261022590167, NA  
"21759", "AC007996.1", 1.13430689801302, 0.185547512569762, 1.377361932835  
07, 0.134712240948785, 0.892839394538958, NA  
"21760", "AC090206.1", 0.274913018026089, -0.226100793799534, 2.7407223210  
9206, -0.0824967900102491, 0.934251670836265, NA  
"21761", "AQP4", 0, NA, NA, NA, NA, NA  
"21762", "CHST9", 0, NA, NA, NA, NA, NA  
"21763", "CDH2", 0.641968262582395, 1.35215486517425, 2.25066158701528, 0.6

00781064987836,0.547985817365899,NA  
"21764","DSC2",2.23033875420734,-0.390736078293412,1.23560632922227,-0.316230233734197,0.751827761119998,NA  
"21765","DSCAS",0,NA,NA,NA,NA,NA  
"21766","DSG3",8.13627311737707,-1.66903450614661,2.17505940148191,-0.767351229584564,NA,NA  
"21767","DSG2",2.16780661501128,-2.40152959883019,1.2561131061997,-1.91187368954048,0.0558923971151425,NA  
"21768","AC017100.1",1.84578963900739,-0.820406234344917,1.2315518698004,-0.666156460367264,0.505311099292591,NA  
"21769","AC022960.1",0.203054089861245,-1.95461545718866,3.33573296423696,-0.585962808817275,0.557900507779092,NA  
"21770","AC022960.2",0.955740063055259,0.775020139485384,1.62098275756492,0.478117448115019,0.632566614090636,NA  
"21771","AC009831.3",0.44207047104394,-0.953743253576691,2.15481320550325,-0.442610640746442,0.658047386860537,NA  
"21772","AC011825.2",1.41974824966095,-0.169224457485089,1.16372582639209,-0.145416088263451,0.884382363076956,NA  
"21773","AC015563.1",0.844293968327465,1.75642212521013,1.57143033279894,1.11772191776501,0.26368577882121,NA  
"21774","AC025887.2",1.35370516920388,0.361927125123623,1.26927210030034,0.285145419203638,0.775532734268764,NA  
"21775","KLHL14",0.102686272020481,-0.0533240139618846,3.35247519753738,-0.0159058638229612,0.987309491940711,NA  
"21776","CCDC178",0.476029541632474,0.782797409005785,2.13622331238367,0.366439877548342,0.714036867915044,NA  
"21777","AC015967.1",0.860980655233101,0.284659282602522,1.68996908764167,0.168440526329248,0.866236728137068,NA  
"21778","AC011815.1",1.86240167247544,1.48993250037509,1.18546763353333,1.25683102450827,0.208814829269661,NA  
"21779","AC116447.1",0.102686272020481,-0.0533240139618846,3.35247519753738,-0.0159058638229612,0.987309491940711,NA  
"21780","AC007998.3",0.155693188003149,-0.774663427007578,3.35247519753738,-0.231072082972193,0.817258802814835,NA  
"21781","AC090220.1",1.31498246843683,0.203771983522261,1.85606704029157,0.109786973799314,0.912578321994103,NA  
"21782","AC023043.4",0,NA,NA,NA,NA,NA  
"21783","AC055840.1",0,NA,NA,NA,NA,NA  
"21784","AC016493.1",0.102686272020481,-0.0533240139618846,3.35247519753738,-0.0159058638229612,0.987309491940711,NA  
"21785","AC015961.1",0.205372544040962,0.695830627438559,3.33747149429751,0.208490358233014,0.834846110249776,NA  
"21786","MIR924HG",0,NA,NA,NA,NA,NA  
"21787","AC021504.1",0.797052100652683,1.62728542967953,1.95313134250258,0.833167434400217,0.404750306151638,NA  
"21788","AC087683.2",0.854556343824548,-0.814782965576764,1.58115152844238,-0.515309855456689,0.606336513137399,NA  
"21789","LINC00907",0.544326345908248,0.061903905068436,1.89043042508009,0.0327459314276606,0.973877195531404,NA  
"21790","SLC14A2",0.466694678280895,1.82173316390714,2.34647708155113,

0.776369468182871,0.43753086662252,NA  
"21791","AC021517.2",0.893064335262634,0.300010844326856,1.64021478273  
491,0.182909486906718,0.854869039002155,NA  
"21792","AC023421.2",0.891243944416466,0.599252107731251,1.77964314375  
094,0.336725994666667,0.736323465669727,NA  
"21793","AC023421.1",1.02722743865576,-1.42018198406255,1.436750693800  
82,-0.988467929885284,0.322923533227604,NA  
"21794","SLC14A1",0.544180021927606,-0.017456973032037,2.1212873626407  
,-0.00822942395239913,0.993433943796792,NA  
"21795","SIGLEC15",0.102230937222884,-1.35173207482145,3.3524751975373  
8,-0.403204198442509,0.686798011343181,NA  
"21796","LOXHD1",0,NA,NA,NA,NA,NA  
"21797","ST8SIA5",0.304332577297202,-1.37410761592356,3.09443671322021  
,-0.444057430566612,0.657001062693595,NA  
"21798","AC090241.3",0.204917209243366,-0.774663427007578,3.3524751975  
3738,-0.231072082972194,0.817258802814834,NA  
"21799","ELOA2",0.102686272020481,-0.0533240139618846,3.35247519753738  
,-0.0159058638229612,0.987309491940711,NA  
"21800","AC012254.3",0.550382614138559,-0.110894743693739,2.3652328898  
924,-0.0468853380855802,0.962604613755852,NA  
"21801","AC093567.1",0,NA,NA,NA,NA,NA  
"21802","AC044840.1",0,NA,NA,NA,NA,NA  
"21803","AC100778.2",0.182454488057851,0.814003878402388,3.33451052748  
657,0.244114952312343,0.80714179253596,NA  
"21804","LIPG",0,NA,NA,NA,NA,NA  
"21805","SKA1",0.510683432883563,0.96260352049863,2.06086846036628,0.4  
67086346853766,0.640438101984342,NA  
"21806","LINC01917",0.231223174500471,-0.207595008908767,3.34245142718  
562,-0.062108609034766,0.950476341218052,NA  
"21807","LINC01919",0,NA,NA,NA,NA,NA  
"21808","STARD6",0.590400849521039,-1.80356351435048,1.7959848697988,-  
1.00421977082275,0.315272694486995,NA  
"21809","AC007673.1",0,NA,NA,NA,NA,NA  
"21810","CCDC68",0.613747114046705,-0.332711985836559,2.04487174065941  
,-0.162705552246162,0.87075027518865,NA  
"21811","LINC01929",0.0534622507802646,-0.0533240139618838,3.352475197  
53738,-0.015905863822961,0.987309491940711,NA  
"21812","AC027584.1",0.102686272020481,-0.0533240139618846,3.352475197  
53738,-0.0159058638229612,0.987309491940711,NA  
"21813","LINC01416",0.712401615268186,2.49489346868397,1.8229873236417  
8,1.36857422776804,0.171132404645507,NA  
"21814","AC009271.2",2.10032640261599,4.0755020260093,1.44714400571672  
,-2.81623805917701,0.00485896475608693,NA  
"21815","LINC01905",0.832752885739701,1.85331251332351,1.6392649660975  
4,1.13057531982492,0.25823388012788,NA  
"21816","LINC01539",0,NA,NA,NA,NA,NA  
"21817","AC012301.1",0.11921983002294,-0.0533240139618846,3.3524751975  
3738,-0.0159058638229612,0.987309491940711,NA  
"21818","AC100847.1",2.05874241961933,-0.685532782850999,1.02879699623  
392,-0.666344075031811,0.50519119976288,NA

"21819", "AC105105.3", 0.752411766645238, 1.5502209363532, 2.1985366070149, 0.705114907528441, 0.480738730021357, NA  
"21820", "AC105105.1", 0.414072648026779, -0.443156236512981, 2.4693586609328, -0.179462077957351, 0.857574891297832, NA  
"21821", "AC104971.1", 1.81755484344029, 1.08839294463373, 1.17701847541237, 0.924703364789922, 0.355120228695845, NA  
"21822", "AC104365.3", 0.102686272020481, -0.0533240139618846, 3.35247519753738, -0.0159058638229612, 0.987309491940711, NA  
"21823", "AC010776.2", 0.768271257495313, -1.81669157674023, 1.86671640214315, -0.973201700405326, 0.330453065891898, NA  
"21824", "CDH20", 0, NA, NA, NA, NA, NA  
"21825", "AC090409.1", 2.31903820117026, -0.00744101477065226, 1.08367026859385, -0.00686649342175604, 0.994521373963672, NA  
"21826", "AC105094.2", 0, NA, NA, NA, NA, NA  
"21827", "AC027514.1", 1.49539870638433, 1.03590215007441, 1.32005108598126, 0.784743985346877, 0.432603688044392, NA  
"21828", "AC064801.1", 1.91939319837707, 0.167536979810562, 1.08097268997761, 0.154987245620454, 0.876831372323796, NA  
"21829", "AC022726.1", 0, NA, NA, NA, NA, NA  
"21830", "AC022726.2", 0.102230937222884, -1.35173207482145, 3.35247519753738, -0.403204198442509, 0.686798011343181, NA  
"21831", "SERPINB5", 0.102686272020481, -0.0533240139618846, 3.35247519753738, -0.0159058638229612, 0.987309491940711, NA  
"21832", "SERPINB7", 0.182454488057851, 0.814003878402388, 3.33451052748657, 0.244114952312343, 0.80714179253596, NA  
"21833", "SERPINB10", 0.795413052624067, 1.74279594303996, 1.88831037842556, 0.922939344586491, 0.356038815466691, NA  
"21834", "HMSD", 0.616010173225927, -0.481564508876231, 1.98872286051614, -0.242147620685192, 0.808665779959531, NA  
"21835", "AC110597.3", 1.39043741026451, -0.646804254968502, 1.22986117353714, -0.525916476498125, 0.598946240487531, NA  
"21836", "AC114689.3", 0.478877777482527, 0.807065019103059, 2.13680543565313, 0.377697007709256, 0.705655690939593, NA  
"21837", "AC040896.1", 0.333909446520952, 0.278100204295702, 2.61855965832055, 0.106203501383682, 0.915420892958132, NA  
"21838", "AC096708.3", 1.03586075059387, -1.49699443008194, 1.5701649885495, -0.953399445917368, 0.340387722058395, NA  
"21839", "AC090337.1", 1.38313787317954, 1.8196412230305, 1.74057926370369, 1.04542278595149, 0.295827610062744, NA  
"21840", "AC021701.1", 0.717129813050671, -0.398235747891969, 1.73460325394329, -0.229583189692892, 0.818415670669898, NA  
"21841", "LINC01909", 0.983197790093446, 1.06908451159039, 1.50984944556848, 0.708073586229563, 0.478899561583022, NA  
"21842", "FBX015", 1.40925131021965, -0.336822327872153, 1.19025718694632, -0.282982813770099, 0.77719001139645, NA  
"21843", "DIPK1C", 0.919994874622492, 0.49091038402136, 2.17192095231845, 0.226025898178904, 0.821181277659499, NA  
"21844", "AC009704.2", 1.04016715443236, 0.133812976455209, 1.86713686738769, 0.0716674705494012, 0.942866544311236, NA  
"21845", "AC015819.2", 0.100823152638361, -1.35173207482145, 3.35247519753

738,-0.40320419844251,0.686798011343181,NA  
"21846","AC015819.1",0,NA,NA,NA,NA,NA  
"21847","AC116003.1",0.221906102043421,0.695830468846429,3.33747149841  
039,0.208490310457437,0.834846147549618,NA  
"21848","AC012101.2",0.701468812416369,0.276012563539361,1.77705308890  
373,0.155320381401568,0.876568748561094,NA  
"21849","AC018413.1",0.790932782553913,-0.533715539065589,1.6244427214  
8327,-0.328553005906084,0.742493573515685,NA  
"21850","C18orf65",1.11230426696336,-0.439951312789997,1.5362877872374  
1,-0.286372980664729,0.774592466816884,NA  
"21851","AC034110.1",0.0644961186387932,-0.0533240139618838,3.35247519  
753738,-0.015905863822961,0.987309491940711,NA  
"21852","AC093330.1",0.481382907795763,0.732552488271384,2.44638770409  
598,0.2994425156098,0.764602426668835,NA  
"21853","AC093330.3",0.102686272020481,-0.0533240139618846,3.352475197  
53738,-0.0159058638229612,0.987309491940711,NA  
"21854","AC018529.1",0.990186186778177,-0.565306984476071,1.4915355135  
1105,-0.379010073414442,0.704680383445286,NA  
"21855","AC018529.2",1.19447917598496,0.0144563055010526,1.66074732952  
974,0.00870469892921406,0.993054742827141,NA  
"21856","GALR1",1.11613998998167,0.973325427956972,1.66328008512497,0.  
585184321427043,0.558423785963652,NA  
"21857","AC124254.2",0.644145741238717,-2.33304712009576,2.19070403825  
733,-1.06497595264017,0.286886812015944,NA  
"21858","AC125437.3",1.80360511892688,2.24216518725579,1.7256273103833  
4,1.29933339242163,0.193829539382614,NA  
"21859","AC104423.1",0.168565237602375,-1.35173207482145,3.35247519753  
738,-0.40320419844251,0.686798011343181,NA  
"21860","AC018445.5",0.306195696679323,-0.0320258052725539,3.128238498  
98919,-0.0102376482109348,0.991831681239967,NA  
"21861","AC068473.3",0.439816747225231,-1.78484417951464,2.78975505408  
687,-0.639785266057649,0.522312212780898,NA  
"21862","AC021594.2",0.100823152638361,-1.35173207482145,3.35247519753  
738,-0.40320419844251,0.686798011343181,NA  
"21863","KCNG2",0,NA,NA,NA,NA,NA  
"21864","AC114341.1",0.273651557422207,0.0572713106177806,2.7582874522  
8977,0.0207633582824144,0.98343442728806,NA  
"21865","AC139100.2",1.59111221388206,1.69625332946701,1.4629226598047  
,1.15949624411003,0.246253966603403,NA  
"21866","AC139100.1",0.0644961186387932,-0.0533240139618838,3.35247519  
753738,-0.015905863822961,0.987309491940711,NA  
"21867","OR4F17",0.515602541957263,-0.821361986554781,2.12348382297609  
, -0.386799267160714,0.698904819799033,NA  
"21868","PLPP2",1.98015496744692,2.46502414533505,1.36561736935498,1.8  
050620918064,0.0710649662260782,NA  
"21869","ODF3L2",1.2223112036344,0.417448258613725,1.43480322947547,0.  
290944604833608,0.771093686455646,NA  
"21870","MADCAM1",2.32911580116214,0.427519746896933,1.07764716977439,  
0.396715881494343,0.691576987469951,NA  
"21871","AC009005.1",0.525904730882246,-2.31434044591359,1.99022065328

451,-1.16285620998565,0.24488784672784,NA  
"21872","HCN2",0.237178199441998,0.945890913069552,2.83590635755811,0.  
333540954393156,0.738725980375699,NA  
"21873","FGF22",0.142120095111522,-0.0533240139618842,3.35247519753738  
,-0.0159058638229611,0.987309491940711,NA  
"21874","AC004156.1",0.855575225173347,-0.159646055761415,1.6507117408  
8634,-0.0967134671712542,0.922953944712403,NA  
"21875","PRSS57",1.09160452311124,-0.430987247829545,1.40265293673973,  
-0.307265779396089,0.758641080672182,NA  
"21876","LINC01836",0.218781522057418,-0.267643672651118,2.94083342748  
661,-0.0910094635587233,0.927485071432953,NA  
"21877","PLPPR3",0.524066549141548,-1.6545065031399,2.00852892075146,-  
0.823740443090505,0.410087054330185,NA  
"21878","AZU1",1.07646486975864,-0.867305565903656,1.58726938807716,-0.  
.546413590798424,0.584781669967647,NA  
"21879","PRTN3",1.7681302887319,-1.02822585506347,1.01725436124652,-1.  
01078539865241,0.312119153068056,NA  
"21880","KISS1R",0,NA,NA,NA,NA,NA  
"21881","AC004528.1",0,NA,NA,NA,NA,NA  
"21882","GRIN3B",0,NA,NA,NA,NA,NA  
"21883","AC004528.2",0,NA,NA,NA,NA,NA  
"21884","CIRBP-  
AS1",1.17327567195863,1.06217180726699,1.56659996696944,0.678010870459  
638,0.497764800867155,NA  
"21885","AC005329.2",0.102686272020481,-0.0533240139618846,3.352475197  
53738,-0.0159058638229612,0.987309491940711,NA  
"21886","AC005329.1",0.636378904436034,-1.1171124130518,1.959585455709  
12,-0.570075885079248,0.568626230255048,NA  
"21887","APC2",0.102686272020481,-0.0533240139618846,3.35247519753738,  
-0.0159058638229612,0.987309491940711,NA  
"21888","PCSK4",2.07174673238149,-0.8220221084914,1.0261766415679,-0.8  
01053225334995,0.423100833322019,NA  
"21889","PLK5",1.59283890407734,0.572984712322542,1.45142770961985,0.3  
94773166121113,0.69301030014623,NA  
"21890","AC012615.6",0.156148522800746,0.494635591052761,3.34300496985  
029,0.147961368742719,0.882373255878367,NA  
"21891","AC012615.5",0,NA,NA,NA,NA,NA  
"21892","CSNK1G2-AS1",0,NA,NA,NA,NA,NA  
"21893","AMH",2.23537467716484,-0.655963275820794,1.12658148713202,-0.  
582259945963345,0.560391600567746,NA  
"21894","JSRP1",1.42775285554938,0.112487511123885,1.24607276903276,0.  
0902736292128437,0.928069775411672,NA  
"21895","PEAK3",0,NA,NA,NA,NA,NA  
"21896","LING03",0.142120095111522,-0.0533240139618842,3.3524751975373  
8,-0.0159058638229611,0.987309491940711,NA  
"21897","AC104530.1",0.901983677244516,-0.0371892423720038,1.519728250  
46653,-0.0244709818091407,0.980476929942836,NA  
"21898","LINC01775",0.410745088081924,1.66416763505049,3.3004354676269  
,-0.504226685046224,0.614102090381297,NA  
"21899","AC092068.1",0,NA,NA,NA,NA,NA

"21900", "AC092068.3", 0, NA, NA, NA, NA, NA  
"21901", "AC006538.1", 0.712060520062914, -0.805884031451632, 1.7541167984  
4945, -0.459424385060331, 0.645929440408683, NA  
"21902", "AC006130.3", 0.0644961186387932, -0.0533240139618838, 3.35247519  
753738, -0.015905863822961, 0.987309491940711, NA  
"21903", "ZNF556", 0.172682080803205, 0.494635591052761, 3.34300496985029,  
0.147961368742719, 0.882373255878367, NA  
"21904", "TLE6", 0.385508577919096, -0.496844509190611, 2.24022373030784, -  
0.221783432819157, 0.824482476998262, NA  
"21905", "KF456478.1", 1.02436619948049, 1.95262183742023, 1.7087950153968  
4, 1.14268933361019, 0.253167599948899, NA  
"21906", "AC005264.1", 0, NA, NA, NA, NA, NA  
"21907", "CELF5", 0.11921983002294, -0.0533240139618846, 3.35247519753738,  
-0.0159058638229612, 0.987309491940711, NA  
"21908", "SMIM24", 0, NA, NA, NA, NA, NA  
"21909", "C19orf71", 0.0644961186387932, -0.0533240139618838, 3.3524751975  
3738, -0.015905863822961, 0.987309491940711, NA  
"21910", "AC005786.3", 0, NA, NA, NA, NA, NA  
"21911", "GIPC3", 0.0534622507802646, -0.0533240139618838, 3.3524751975373  
8, -0.015905863822961, 0.987309491940711, NA  
"21912", "CACTIN-  
AS1", 0.528780649380432, -0.28878799404873, 2.37140412938923, -0.121779324  
944968, 0.903073788368313, NA  
"21913", "TJP3", 0.54558780651213, 0.00631362790627725, 2.36732784282167, 0  
.00266698502508714, 0.9978720563472, NA  
"21914", "RAX2", 0, NA, NA, NA, NA, NA  
"21915", "ZFR2", 0.102230937222884, -1.35173207482145, 3.35247519753738, -0  
.403204198442509, 0.686798011343181, NA  
"21916", "AC016586.1", 0.287785067625315, -0.774666036310719, 3.1203959310  
9626, -0.248258891953677, 0.803934102976972, NA  
"21917", "CREB3L3", 0, NA, NA, NA, NA, NA  
"21918", "ANKRD24", 0.593525429507041, -1.31397961279583, 1.85829918392666  
, -0.707087224791943, 0.479512274480051, NA  
"21919", "EBI3", 0.142120095111522, -0.0533240139618842, 3.35247519753738,  
-0.0159058638229611, 0.987309491940711, NA  
"21920", "SHD", 0, NA, NA, NA, NA, NA  
"21921", "TMIGD2", 0.489000975745863, -1.20732043040348, 2.08877732135987,  
-0.578003417624944, 0.563261811855226, NA  
"21922", "FSD1", 0.345174184972767, -1.38629500102082, 2.56076240199981, -0  
.541360260498282, 0.588259292553927, NA  
"21923", "AC007292.3", 0, NA, NA, NA, NA, NA  
"21924", "AC007292.2", 2.01395845232076, -0.448992036834209, 1.21009858357  
743, -0.371037569110154, 0.710609549656903, NA  
"21925", "AC007292.1", 0.827188444526448, -0.39863990439062, 1.68416489811  
885, -0.236698855816249, 0.812890422667854, NA  
"21926", "AC011498.6", 0.865093096693746, 0.708616817016869, 1.60656181315  
981, 0.441076596749895, 0.6591575456517, NA  
"21927", "AC011498.1", 0.557384532916015, 1.2128618079702, 1.9834196921917  
, 0.611500335882001, 0.540868396056995, NA  
"21928", "PLIN4", 1.50339615752198, -1.21407459998732, 1.2666001466388, -0.



958530285354168,0.337795427484384,NA  
"21929","PLIN5",0.408426633902207,-0.672062860683508,2.50236050943416,  
-0.268571557994846,0.78825940178234,NA  
"21930","LRG1",0.991975189126555,0.345125265820958,1.69670530201575,0.  
203409080770205,0.838815302746699,NA  
"21931","SEMA6B",1.00058605901646,-3.23327999970943,1.67601423762471,-  
1.92914828951078,0.0537124555847012,NA  
"21932","DPP9-AS1",0,NA,NA,NA,NA,NA  
"21933","AC005523.1",0.993327285158246,-0.957860413263107,1.6106817889  
3181,-0.594692520797884,0.552049022165384,NA  
"21934","AC027319.1",0.866507178079735,0.0039305040758234,2.1963077009  
08,0.00178959627296232,0.998572109525906,NA  
"21935","ARRDC5",0.102686272020481,-0.0533240139618846,3.3524751975373  
8,-0.0159058638229612,0.987309491940711,NA  
"21936","UHRF1",0.699873209930755,-0.241355283764339,1.78481443817359,  
-0.135227101822035,0.892432319741721,NA  
"21937","AC022517.1",0.629869709993408,1.21172968165762,2.327673471296  
52,0.520575457253755,0.60266255003129,NA  
"21938","AC005790.1",1.43538508973764,-1.1525184722272,1.2418721494997  
3,-0.92804921399637,0.353382041721621,NA  
"21939","TINCR",0.916761574761814,1.69341674820017,1.93169756851702,0.  
876646932625287,0.38067843897289,NA  
"21940","NRTN",1.02558091404125,-0.605912424583028,1.49240188719861,-0  
.405998162948177,0.684743950208845,NA  
"21941","AC011444.2",1.82841403958912,-0.210118029897447,1.14811915346  
448,-0.183010647687054,0.854789664071031,NA  
"21942","ACSBG2",0.256971675439106,-0.226175799809587,2.79502848435046  
, -0.0809207494935953,0.935504978368658,NA  
"21943","AC011471.2",0.964298838444791,-1.1438206235144,1.520609494474  
43,-0.752211943744134,0.451923612139789,NA  
"21944","AC011491.2",0.102686272020481,-0.0533240139618846,3.352475197  
53738,-0.0159058638229612,0.987309491940711,NA  
"21945","CRB3",0.195582345891787,0.494635591052761,3.34300496985029,0.  
147961368742719,0.882373255878367,NA  
"21946","DENND1C",1.52776841645764,0.451891156346614,1.17329630479859,  
0.385146662866365,0.700128757628002,NA  
"21947","AC010503.4",0,NA,NA,NA,NA,NA  
"21948","TUBB4A",0.302506847452316,1.19722465046043,3.09053531551828,0  
.387384232255459,0.698471775165589,NA  
"21949","AC008760.1",0,NA,NA,NA,NA,NA  
"21950","VAV1",2.23797445095452,0.386907679519958,1.03679540615674,0.3  
73176498682774,0.709017086194001,NA  
"21951","ADGRE1",0.528084007828215,1.00460427296788,1.87812832127823,0  
.534896503921605,0.592721425965039,NA  
"21952","AC119396.1",0,NA,NA,NA,NA,NA  
"21953","AC119396.2",1.33581492946473,-0.141634533029299,1.61024901741  
284,-0.0879581552279785,0.929909934476714,NA  
"21954","TEX45",0.203509424658842,-0.774663427007579,3.35247519753738,  
-0.231072082972194,0.817258802814834,NA  
"21955","PCP2",0,NA,NA,NA,NA,NA

"21956", "AC008763.1", 0, NA, NA, NA, NA, NA  
"21957", "MCEMP1", 1.09305360819286, 0.774087098478515, 1.61934781901352, 0.478023985575919, 0.632633133484793, NA  
"21958", "FCER2", 0.934251758636968, -3.1273988682083, 1.9201925643519, -1.62869022944262, 0.103378612170151, NA  
"21959", "CLEC4G", 0.691626348943483, -2.67829164358935, 1.86745277974545, -1.43419510931592, 0.151516592329997, NA  
"21960", "PRR36", 1.80138426483516, -0.948580291594651, 1.0894732264724, -0.870677928145193, 0.38393003328801, NA  
"21961", "AC010336.1", 0.386770038522978, -0.777140795601295, 2.23651825660742, -0.347477957448084, 0.728232275507767, NA  
"21962", "TGFB3L", 0.0534622507802646, -0.0533240139618838, 3.35247519753738, -0.015905863822961, 0.987309491940711, NA  
"21963", "AC010336.5", 0.102686272020481, -0.0533240139618846, 3.35247519753738, -0.0159058638229612, 0.987309491940711, NA  
"21964", "AC010336.6", 0.324592374063902, 1.32629053141379, 3.07347552214963, 0.431527930466861, 0.666084548480396, NA  
"21965", "CCL25", 0.0534622507802646, -0.0533240139618838, 3.35247519753738, -0.015905863822961, 0.987309491940711, NA  
"21966", "AC022146.2", 0.102686272020481, -0.0533240139618846, 3.35247519753738, -0.0159058638229612, 0.987309491940711, NA  
"21967", "KANK3", 1.671035870451, -1.44582228597723, 1.26226697234276, -1.1454171880088, 0.25203638166767, NA  
"21968", "MUC16", 0.102686272020481, -0.0533240139618846, 3.35247519753738, -0.0159058638229612, 0.987309491940711, NA  
"21969", "AC011451.1", 1.58277527690027, 0.114881655385431, 1.35970370157455, 0.084490213016554, 0.932666683899886, NA  
"21970", "AC011451.4", 0.117958369419058, 0.451348601316665, 3.34428110054629, 0.134961322851401, 0.892642454377335, NA  
"21971", "AC008567.3", 0.603098310198801, -1.62987452787885, 1.97212544018583, -0.826455809892737, 0.408545575651843, NA  
"21972", "AC008759.3", 0.702969013050234, -1.06643452874784, 1.77071759190128, -0.602261215241426, 0.547000273504452, NA  
"21973", "AC008752.2", 1.01440786894898, 0.287944502201839, 1.51639868030626, 0.18988706989885, 0.84939762485553, NA  
"21974", "AC008742.1", 0.427278646084383, 1.70712042304806, 2.85122212164452, 0.598732876715838, 0.549351029677302, NA  
"21975", "AC020931.1", 0.102686272020481, -0.0533240139618846, 3.35247519753738, -0.0159058638229612, 0.987309491940711, NA  
"21976", "ANGPTL6", 1.14151034800215, -1.04201285285193, 1.36269767840284, -0.764669133415734, 0.444468590764485, NA  
"21977", "AC011511.3", 0.102686272020481, -0.0533240139618846, 3.35247519753738, -0.0159058638229612, 0.987309491940711, NA  
"21978", "ICAM5", 1.68842512256299, -0.227468988728401, 1.14714151780709, -0.198292002510063, 0.842816608531952, NA  
"21979", "AC114271.1", 0.534416441912403, 0.402041090567136, 2.10436465274012, 0.191051056690024, 0.848485592340984, NA  
"21980", "S1PR5", 1.0458390303154, 1.35394483657263, 1.59595666121065, 0.848359400652875, 0.396237845759428, NA  
"21981", "AP1M2", 0.0534622507802646, -0.0533240139618838, 3.3524751975373

8,-0.015905863822961,0.987309491940711,NA  
"21982","AC011472.1",0.679127284146719,1.40755381857945,1.819316467282  
71,0.773671784921366,0.439124909363786,NA  
"21983","ANGPTL8",2.12155250706342,-0.405765983222652,1.21459214872477  
, -0.334075914823486,0.738322274176614,NA  
"21984","AC011472.2",0.564119821905356,-0.692516214433058,2.0391577621  
9803,-0.33960894408022,0.734151041671436,NA  
"21985","AC011472.3",1.85432057317019,-0.0836413609679345,1.1055653167  
8694,-0.0756548344072674,0.93969370987883,NA  
"21986","RGL3",2.23752042234309,0.576160754640245,1.19216588823748,0.4  
83289079418344,0.628890492988784,NA  
"21987","CCDC151",1.58396464278732,1.2611023908938,1.26020915286002,1.  
00070880141741,0.316967611043839,NA  
"21988","ELAVL3",0,NA,NA,NA,NA,NA  
"21989","CNN1",2.28305216572425,-0.701361781953983,1.03807298874526,-0.  
.675638215769137,0.499270371884884,NA  
"21990","AC008543.1",1.16599284756738,0.431408034421158,1.354365894932  
61,0.318531377698804,0.750081897165097,NA  
"21991","AC008543.5",0,NA,NA,NA,NA,NA  
"21992","ZNF491",1.95894548704538,3.13629227395819,1.31371321330098,2.  
38734926481983,0.0169703603599052,NA  
"21993","ZNF878",1.71918941655017,-1.69765726661523,1.20386052980275,-  
1.41017769466484,0.158487220330577,NA  
"21994","AC010422.7",0,NA,NA,NA,NA,NA  
"21995","AC010422.2",0.0644961186387932,-0.0533240139618838,3.35247519  
753738,-0.015905863822961,0.987309491940711,NA  
"21996","AC018761.2",0,NA,NA,NA,NA,NA  
"21997","MAST1",0.427361920196566,-1.05588242596016,2.456319716484,-0.  
429863595880572,0.667294868167363,NA  
"21998","SYCE2",0.515187020587566,-0.0582541577447833,2.07304121846138  
, -0.0281008198129411,0.977581740216675,NA  
"21999","DAND5",0,NA,NA,NA,NA,NA  
"22000","AC138474.1",0.102686272020481,-0.0533240139618846,3.352475197  
53738,-0.0159058638229612,0.987309491940711,NA  
"22001","AC005546.1",0,NA,NA,NA,NA,NA  
"22002","AC011446.1",0.307603481263847,-0.0321837065735757,3.123618821  
83901,-0.0103033399429408,0.99177926958558,NA  
"22003","AC011446.3",0,NA,NA,NA,NA,NA  
"22004","AC008686.1",0.595388548889162,-0.178876155352402,2.0715098194  
0807,-0.086350619087828,0.931187700496372,NA  
"22005","NANOS3",1.5737207903331,0.268699819939572,1.17240310685231,0.  
22918722951953,0.818723397811934,NA  
"22006","C19orf57",2.12272363237426,0.0457408510861552,0.9658042729686  
44,0.0473603734901267,0.96222601093354,NA  
"22007","AC022098.4",1.04939623937953,-3.35703013108923,1.520015063241  
95,-2.20855056786688,0.0272059168541495,NA  
"22008","RLN3",0,NA,NA,NA,NA,NA  
"22009","AC022098.2",0,NA,NA,NA,NA,NA  
"22010","PALM3",0,NA,NA,NA,NA,NA  
"22011","AC022098.3",0.168565237602375,-1.35173207482145,3.35247519753

738,-0.40320419844251,0.686798011343181,NA  
"22012","ASF1B",0.607268355981876,0.266583914042684,2.0473568460589,0.130208817557061,0.896401218572105,NA  
"22013","LINC01842",0.102230937222884,-1.35173207482145,3.35247519753738,-0.403204198442509,0.686798011343181,NA  
"22014","AC008569.1",0,NA,NA,NA,NA,NA  
"22015","PTGER1",1.54580151857189,-2.03282291448242,1.46778370057415,-1.38496081792382,0.166064448611992,NA  
"22016","CLEC17A",0,NA,NA,NA,NA,NA  
"22017","ADGRE3",0.0644961186387932,-0.0533240139618838,3.35247519753738,-0.015905863822961,0.987309491940711,NA  
"22018","ADGRE2",2.14206712057638,0.307554608657029,1.26921522440369,0.242318720059103,0.808533209441754,NA  
"22019","OR7C1",0.324137039266305,-0.0524131773797337,2.65349229594242,-0.0197525266833754,0.984240788704199,NA  
"22020","AC003956.1",0.345629519770364,-0.054409187889382,2.61698850261154,-0.0207907630603215,0.98341256615796,NA  
"22021","EPHX3",0.982930079773585,2.01866325386724,1.66172521888759,1.21479967381045,0.224442505297934,NA  
"22022","AC005776.2",0.913165141584149,1.04311941628756,1.91034602937167,0.546036896064664,0.58504057537427,NA  
"22023","AC005785.1",0.826797860798174,1.01788961122981,1.65934764828752,0.613427579374517,0.53959365477653,NA  
"22024","PGLYRP2",0.322729254681782,-0.0522366723701696,2.65678688704254,-0.0196615967298446,0.984313326223208,NA  
"22025","CYP4F22",0.266142423915515,-1.3728236824524,3.23491314131495,-0.424377293139429,0.671290677960157,NA  
"22026","CYP4F3",0.784543692491514,2.59105554064599,2.1215964502728,1.22127633665339,0.221981409773725,NA  
"22027","LINC01764",0.22202748838264,-0.774663427007578,3.35247519753738,-0.231072082972193,0.817258802814835,NA  
"22028","AC008894.2",0.538801718122894,-1.37181357216896,1.87316993432587,-0.732348703142438,0.4639557598547,NA  
"22029","HSH2D",2.25008823717193,-0.356770079680151,0.910356502128166,-0.391901501056036,0.695130993844882,NA  
"22030","AC020911.1",0.102686272020481,-0.0533240139618846,3.35247519753738,-0.0159058638229612,0.987309491940711,NA  
"22031","AC020911.3",0,NA,NA,NA,NA,NA  
"22032","AC020917.3",0.231678509298067,0.99788326475647,3.33029638254771,0.299637975162162,0.764453314336329,NA  
"22033","AC008764.6",0.597213556044246,-0.366164961270886,1.88134832725714,-0.194629009400256,0.845683391108462,NA  
"22034","AC008764.3",0.78626583635024,-1.62422107385837,1.94701019631727,-0.834212926532464,0.404161008169038,NA  
"22035","AC008764.2",0.285140760078332,1.24218829249876,2.67233955061369,0.464831758454311,0.642051942885121,NA  
"22036","F2RL3",0.220189306641942,-0.267602342861375,2.93506496557825,-0.0911742486111047,0.927354136344172,NA  
"22037","AC020913.1",0.286402220682214,1.17253773374183,2.71767620516714,0.431448651429658,0.666142181249859,NA

"22038", "USHBP1", 0.305740361881726, -1.38485840137887, 2.64966120810703, -0.52265489532839, 0.601214431685811, NA  
"22039", "ANKLE1", 1.98098936565276, 0.245344936868252, 1.07163834700901, 0.228943782716454, 0.818912610476677, NA  
"22040", "AC010463.3", 0.221450767245824, -0.774663427007578, 3.35247519753738, -0.231072082972194, 0.817258802814834, NA  
"22041", "PLVAP", 1.27446263045364, 0.534839051492586, 1.53787567518588, 0.347777821134951, 0.72800704731831, NA  
"22042", "CCDC194", 0.43843390028213, 0.406978656351188, 2.44924928597198, 0.166164652443567, 0.868027375954558, NA  
"22043", "AC010319.4", 0.592597917361537, 1.18648102629363, 2.06032717635257, 0.575870201544432, 0.564702918349986, NA  
"22044", "AC010319.3", 0.386926462243525, 1.51070939514628, 2.94063395657504, 0.513735955394397, 0.607436610092053, NA  
"22045", "NXNL1", 0.719162766015999, 2.45893878070008, 1.67637705842434, 1.4668172463606, 0.14242577683619, NA  
"22046", "NIBAN3", 0.544756743064421, -0.359949752762879, 1.90858751121099, -0.188594838145248, 0.850410378777875, NA  
"22047", "FCH01", 2.01783853915912, -1.59291889348461, 1.06537910614479, -1.49516625987607, 0.13487105670022, NA  
"22048", "INSL3", 0.269388390240736, -2.09481427187859, 3.17548848369632, -0.659682528415343, 0.509457580965155, NA  
"22049", "SLC5A5", 0, NA, NA, NA, NA, NA  
"22050", "KCNN1", 0.171420620199322, 0.765902268429694, 3.33569101336987, 0.22960827767316, 0.818396174063793, NA  
"22051", "IL12RB1", 2.03652305477271, -0.708056448329368, 1.03665470846339, -0.683020529930263, 0.494593869917742, NA  
"22052", "AC007192.2", 0, NA, NA, NA, NA, NA  
"22053", "AC005759.1", 0.142120095111522, -0.0533240139618842, 3.35247519753738, -0.0159058638229611, 0.987309491940711, NA  
"22054", "AC008397.1", 0.268005543297635, -0.150415693622294, 2.77274999608506, -0.0542478383679276, 0.956737707263394, NA  
"22055", "LRRC25", 1.60006267423993, -1.94946118037405, 1.19419547063496, -1.63244730725491, 0.102585290223099, NA  
"22056", "AC005253.2", 0.412916269936782, -1.51539988922005, 2.4355798329174, -0.622192657673989, 0.533815193406262, NA  
"22057", "TMEM59L", 1.41889847920556, 1.62452822729739, 1.33462501606571, 1.21721697686012, 0.223521672573721, NA  
"22058", "AC005197.1", 0, NA, NA, NA, NA, NA  
"22059", "HOMER3-AS1", 0.971117028398988, 0.865742802255687, 1.62913767613444, 0.531411687875201, 0.595133523941908, NA  
"22060", "HAPLN4", 0.410801744060135, -1.33830977883862, 2.45253624661623, -0.545683995775837, 0.585283174982013, NA  
"22061", "TSSK6", 0.426230479747991, -0.155329733446175, 2.44221910563302, -0.0636018828482279, 0.94928723248374, NA  
"22062", "CILP2", 2.34322198351886, 0.292653573789843, 1.04425416120797, 0.280251288107205, 0.779284720274607, NA  
"22063", "AC002306.1", 0.750497324600872, 1.4952311489827, 2.01645616241174, 0.74151433433314, 0.458381643714629, NA

"22064", "AC008554.1", 0.102686272020481, -0.0533240139618846, 3.35247519753738, -0.0159058638229612, 0.987309491940711, NA  
"22065", "AC010615.2", 1.01831619176499, 2.951043692889, 1.82704118727669, 1.61520370391196, 0.106266588723915, NA  
"22066", "LINC00664", 1.33137684920555, 1.25306447861819, 1.52439323789702, 0.822008683498795, 0.411071954818696, NA  
"22067", "AC123912.1", 0.491294492284157, -0.81477354187475, 2.1363245253609, -0.381390342245454, 0.702913626234607, NA  
"22068", "AC123912.2", 0.284240190223044, 0.69583062743856, 3.33747149429751, 0.208490358233014, 0.834846110249776, NA  
"22069", "AC092364.1", 0.193488355916379, 0.860398995964988, 3.33340328940337, 0.258114281791264, 0.796318709677277, NA  
"22070", "ZNF729", 0.244806367132003, 0.695807100884759, 3.33664907448574, 0.208534696143316, 0.834811494458112, NA  
"22071", "AC024563.1", 0.156148522800746, 0.494635591052761, 3.34300496985029, 0.147961368742719, 0.882373255878367, NA  
"22072", "ZNF723", 0, NA, NA, NA, NA, NA  
"22073", "AC074135.1", 0.128992237277586, 0.513744972953418, 3.34245151459318, 0.153703044220807, 0.877843884367224, NA  
"22074", "AC010300.1", 0.324592374063902, 1.32629053141379, 3.07347552214963, 0.431527930466861, 0.666084548480396, NA  
"22075", "AC073534.2", 2.08305406555458, -1.26825873280995, 1.01734870367629, -1.24663129586441, 0.212532721013541, NA  
"22076", "LINC01532", 0.524977218736741, 0.0386468512149867, 2.07985491751817, 0.0185815130129859, 0.985174950769436, NA  
"22077", "AC007786.1", 1.59795474368077, 1.00213901656686, 1.18341193820162, 0.846821790635107, 0.397094460492145, NA  
"22078", "AC007786.2", 0.203509424658842, -0.774663427007579, 3.35247519753738, -0.231072082972194, 0.817258802814834, NA  
"22079", "VSTM2B", 0, NA, NA, NA, NA, NA  
"22080", "AC008798.2", 0.142120095111522, -0.0533240139618842, 3.35247519753738, -0.0159058638229611, 0.987309491940711, NA  
"22081", "AC008507.2", 0.23843966004588, 0.69583062743856, 3.33747149429751, 0.208490358233014, 0.834846110249776, NA  
"22082", "AC008507.4", 0.361734361109198, -0.774668275573776, 2.90649032210001, -0.266530485129591, 0.789830684487713, NA  
"22083", "RGS9BP", 0, NA, NA, NA, NA, NA  
"22084", "TDRD12", 0.97405640779792, -1.03308289944357, 1.65268848614341, -0.625092331740201, 0.531910460499382, NA  
"22085", "SLC7A9", 0.810169858746713, 0.0551509694485107, 1.60471637847908, 0.0343680479542322, 0.972583662451242, NA  
"22086", "RHPN2", 1.67007945914704, 0.460306310134566, 1.45238855494414, 0.316930554545901, 0.751296297053127, NA  
"22087", "WDR88", 0.261209904979155, -0.00458555259217486, 3.29716284438065, -0.00139075708680571, 0.99889033675033, NA  
"22088", "AC008738.1", 0.0644961186387932, -0.0533240139618838, 3.35247519753738, -0.015905863822961, 0.987309491940711, NA  
"22089", "SLC7A10", 0.837864967748384, -2.03173224910701, 1.70282472592838, -1.19315406816125, 0.232809039558303, NA  
"22090", "AC008738.3", 0, NA, NA, NA, NA, NA

"22091", "AC008738.2", 0.673172259205193, 0.489064374478434, 1.80902079207  
076, 0.270347569592392, 0.786892872066757, NA  
"22092", "AC008556.1", 0.56524378576804, -0.818092796036664, 2.08633287142  
222, -0.392119976271563, 0.694969568138555, NA  
"22093", "AC010504.1", 0, NA, NA, NA, NA, NA  
"22094", "SCGB2B2", 0.978825159366221, 0.727800789800488, 2.02894578603204  
, 0.358708840231671, 0.719812914395462, NA  
"22095", "AC020910.2", 1.29447787011573, 0.841299005234767, 1.377299997845  
69, 0.610832067487612, 0.541310761552599, NA  
"22096", "LINC01801", 0.322300538018157, -0.774667165166207, 3.01445988835  
95, -0.256983736342828, 0.797191328075268, NA  
"22097", "AC008555.1", 0.392871387445147, 0.542201704530288, 2.19605406031  
056, 0.246898158988677, 0.804987041144592, NA  
"22098", "AC008555.2", 0, NA, NA, NA, NA, NA  
"22099", "ZNF30-  
AS1", 0.0534622507802646, -0.0533240139618838, 3.35247519753738, -0.015905  
863822961, 0.987309491940711, NA  
"22100", "AC020907.3", 0.172682080803205, 0.494635591052761, 3.34300496985  
029, 0.147961368742719, 0.882373255878367, NA  
"22101", "FXD3", 0.23843966004588, 0.69583062743856, 3.33747149429751, 0.2  
08490358233014, 0.834846110249776, NA  
"22102", "AC002128.1", 0.100823152638361, -1.35173207482145, 3.35247519753  
738, -0.40320419844251, 0.686798011343181, NA  
"22103", "HAMP", 0.0534622507802646, -0.0533240139618838, 3.35247519753738  
, -0.015905863822961, 0.987309491940711, NA  
"22104", "MAG", 0, NA, NA, NA, NA, NA  
"22105", "CD22", 0.766207510310246, -0.393664729592672, 1.64012810777167, -  
0.240020720166498, 0.810314193682743, NA  
"22106", "FFAR1", 0.172682080803205, 0.494635591052761, 3.34300496985029, 0  
.147961368742719, 0.882373255878367, NA  
"22107", "FFAR3", 0.419221547162021, 1.74488494039214, 2.78792767217681, 0.  
625871667262352, 0.531399119631611, NA  
"22108", "GPR42", 0.649843062884253, 0.510358739592114, 1.66506960431363, 0  
.306508952100229, 0.759217164844585, NA  
"22109", "AC002511.2", 0, NA, NA, NA, NA, NA  
"22110", "FFAR2", 0.298268617912268, 1.11711823327978, 2.67902047659825, 0.  
416987568045118, 0.676687501005877, NA  
"22111", "AD000090.1", 0.237178199441998, 0.945890913069552, 2.83590635755  
811, 0.333540954393156, 0.738725980375699, NA  
"22112", "ZBTB32", 0, NA, NA, NA, NA, NA  
"22113", "AD000671.3", 0.156148522800746, 0.494635591052761, 3.34300496985  
029, 0.147961368742719, 0.882373255878367, NA  
"22114", "AF038458.2", 0.530753253016621, 0.917925616357591, 1.93129997964  
599, 0.475288989815994, 0.634581005667484, NA  
"22115", "SYNE4", 0.694811063689893, 0.59516685010679, 1.6593125980457, 0.3  
58682776715951, 0.719832414382036, NA  
"22116", "WDR62", 0.792847424025729, 1.67576347883257, 1.89743998158755, 0.  
883170743261397, 0.37714402635372, NA  
"22117", "AC092295.2", 1.56989459348496, -0.518834725164188, 1.25682232848  
724, -0.412814694172944, 0.679742384784308, NA

"22118", "AC074138.1", 0.389088492702695, 1.57791456375365, 2.493269790487  
27, 0.632869563403832, 0.526818825201591, NA  
"22119", "AC020928.1", 0.620113821132828, -0.366591396672367, 1.8707098613  
1347, -0.195963791207566, 0.844638506901813, NA  
"22120", "AC020928.2", 0.102686272020481, -0.0533240139618846, 3.352475197  
53738, -0.0159058638229612, 0.987309491940711, NA  
"22121", "AC016590.1", 0.481273423541694, 0.616171887409792, 2.38549784041  
638, 0.258299075761159, 0.796176099506425, NA  
"22122", "LINC01535", 0.11921983002294, -0.0533240139618846, 3.35247519753  
738, -0.0159058638229612, 0.987309491940711, NA  
"22123", "AC016590.4", 0.909518471082433, 0.469177258947307, 1.84992386163  
091, 0.253619767104185, 0.799789323902623, NA  
"22124", "AC016590.3", 2.05405331257494, 1.71777737963382, 1.1251461387293  
7, 1.52671490440674, 0.126831919590471, NA  
"22125", "AC016590.2", 0, NA, NA, NA, NA, NA  
"22126", "ZNF793-  
AS1", 0.704120989400048, -1.27330115885884, 1.73524628913332, -0.733786994  
291627, 0.463078568327135, NA  
"22127", "AC022148.1", 0, NA, NA, NA, NA, NA  
"22128", "ZNF571-  
AS1", 0.923076726072543, 0.117791061954186, 1.91416850468064, 0.0615364121  
111364, 0.950932016669379, NA  
"22129", "AC093227.3", 0.154285403418625, -0.774663427007578, 3.3524751975  
3738, -0.231072082972193, 0.817258802814835, NA  
"22130", "AC008395.1", 0, NA, NA, NA, NA, NA  
"22131", "AC011479.3", 0.261339925134462, 0.693947743382389, 3.27302645474  
789, 0.212020206062111, 0.832091270506721, NA  
"22132", "PPP1R14A", 0.573181635938357, 1.09682742959986, 1.86407379490847  
, 0.588403437994641, 0.556261530658705, NA  
"22133", "C19orf33", 0.0644961186387932, -0.0533240139618838, 3.3524751975  
3738, -0.015905863822961, 0.987309491940711, NA  
"22134", "GGN", 0.406563514520087, -1.7939550059263, 2.41951443461661, -0.7  
41452491565964, 0.458419127369659, NA  
"22135", "SPRED3", 1.17758311523022, -0.576597083946436, 1.48506704375034,  
-0.388263335566533, 0.697821167107493, NA  
"22136", "RASGRP4", 1.95025155102118, -2.04661409829017, 1.1056765078912, -  
1.85100622440968, 0.0641686576455303, NA  
"22137", "AC008649.1", 0, NA, NA, NA, NA, NA  
"22138", "CAPN12", 1.43722159098579, -0.807580363572633, 1.24190691452034,  
-0.650274472370214, 0.515514943450119, NA  
"22139", "AC022144.1", 0.183715948661733, 0.576034712544328, 3.34068880739  
852, 0.172429922616139, 0.863099549623161, NA  
"22140", "LGALS4", 2.26617432019086, 0.920541458118214, 1.03596875903119, 0  
.888580326475364, 0.374228668126469, NA  
"22141", "CCER2", 1.3726316282588, -0.074718000904139, 1.34192033952949, -0  
.055679907892548, 0.955596805846464, NA  
"22142", "ERVK9-11", 1.59212259214766, 0.311862117673298, 1.23709488155082  
, 0.252092319129432, 0.800969706734306, NA  
"22143", "AC011455.6", 1.10692944878567, 1.42749948473478, 1.5981430290177  
5, 0.893223859701814, 0.371737303159061, NA



"22144","AC011443.1",0.142120095111522,-0.0533240139618842,3.35247519753738,-0.0159058638229611,0.987309491940711,NA  
"22145","IFNL1",0.166727055861678,-0.774663427007578,3.35247519753738,-0.231072082972193,0.817258802814835,NA  
"22146","LRFN1",1.52432628455463,-0.608270301383268,1.33223784744577,-0.456577856986627,0.647974497893484,NA  
"22147","CLC",0.284539101300094,-0.150986859606036,2.72667162408639,-0.0553740532128162,0.955840466649586,NA  
"22148","AC005393.1",0.274913018026089,-0.226100793799534,2.74072232109206,-0.0824967900102491,0.934251670836265,NA  
"22149","AC005614.1",0,NA,NA,NA,NA,NA  
"22150","TTC9B",0.0644961186387932,-0.0533240139618838,3.35247519753738,-0.015905863822961,0.987309491940711,NA  
"22151","CNTD2",0.754367516645432,0.499397363720773,1.74262733998769,0.286577257375234,0.774436030321455,NA  
"22152","AC118344.1",0.314802175914727,1.16511964632437,2.6519779114781,0.439339875826864,0.660415284707152,NA  
"22153","HIPK4",1.54672840511637,0.56906145936637,1.19842393780813,0.474841532627562,0.634899927490718,NA  
"22154","SPTBN4",1.27304660490383,-0.177894488198729,1.27603881988587,-0.139411501771271,0.889124984015914,NA  
"22155","MIA",0.172682080803205,0.494635591052761,3.34300496985029,0.147961368742719,0.882373255878367,NA  
"22156","AC008537.4",0.284539101300094,-0.150986859606036,2.72667162408639,-0.0553740532128162,0.955840466649586,NA  
"22157","AC008537.2",0,NA,NA,NA,NA,NA  
"22158","CYP2A6",0,NA,NA,NA,NA,NA  
"22159","CYP2F1",0,NA,NA,NA,NA,NA  
"22160","CYP2S1",1.62979289493948,-0.884130107482731,1.5081993164571,-0.586215693002455,0.557730577206277,NA  
"22161","AC011462.4",0.204917209243366,-0.774663427007578,3.35247519753738,-0.231072082972194,0.817258802814834,NA  
"22162","ERICH4",0,NA,NA,NA,NA,NA  
"22163","PCAT19",1.62976001368974,-0.552803250654947,1.3482208888381,-0.41002424397337,0.681788163143322,NA  
"22164","AC243960.3",0.261339925134462,0.693947743382389,3.27302645474789,0.212020206062111,0.832091270506721,NA  
"22165","LINC01480",2.22717052957223,-0.0626819036191137,1.12694782073551,-0.0556209457667738,0.955643778024227,NA  
"22166","AC243960.1",0.314672155759419,0.253123291804313,3.11930621204769,0.0811473047521514,0.935324805950557,NA  
"22167","CEACAM21",0.284539101300094,-0.150986859606036,2.72667162408639,-0.0553740532128162,0.955840466649586,NA  
"22168","CEACAM4",0.423097072522546,-1.79554273832128,2.39217736801592,-0.750589300913966,0.452899862067976,NA  
"22169","CEACAM3",0.291901910826145,1.18808087585529,3.15650789412603,0.376390909101225,0.70662630344776,NA  
"22170","ERFL",0.100823152638361,-1.35173207482145,3.35247519753738,-0.40320419844251,0.686798011343181,NA  
"22171","ATP1A3",0.42636797648919,-0.678633614701833,2.48217085148933,

-0.273403264845627,0.784543243376921,NA  
"22172","AC010247.1",0.102686272020481,-0.0533240139618846,3.352475197  
53738,-0.0159058638229612,0.987309491940711,NA  
"22173","AC010247.2",0,NA,NA,NA,NA,NA  
"22174","PRR19",0.263073024361275,1.1485336607599,3.23397067510699,0.3  
55146591031441,0.722479774079932,NA  
"22175","CEACAM1",1.32242376305111,1.11231078355239,1.60133221228343,0  
.694615879840624,0.487296057813363,NA  
"22176","PSG1",0.35765949006882,1.43749688423347,3.31232068124828,0.43  
3984816860106,0.664299466649274,NA  
"22177","CD177",3.0589315652352,4.57121764611279,3.23606666290106,1.41  
258451147443,NA,NA  
"22178","SRRM5",0.566651570352564,-0.823778773028611,2.08576424977191,  
-0.394952964180249,0.692877600993891,NA  
"22179","CADM4",1.19015932859811,-1.65950065111622,1.53631224830537,-1  
.08018448264455,0.2800600369489,NA  
"22180","LYPD5",0.629436942136912,-1.18737366614983,2.21752069029539,-  
0.53545099774995,0.592338033628203,NA  
"22181","ZNF404",0.688810779774436,-2.67285555652222,1.86844359625259,  
-1.4305251503888,0.152566352719049,NA  
"22182","AC006213.2",1.85778916912342,-1.19656791319272,1.305352421306  
35,-0.916662729284434,0.35931940220947,NA  
"22183","AC006213.3",0.388633157905099,0.432636944008462,2.25154176219  
256,0.192151418762563,0.84762359891593,NA  
"22184","AC006213.5",0.666350759128241,-1.05165058321584,1.95072657679  
574,-0.539107118201709,0.589812944254895,NA  
"22185","AC006213.1",1.56988064181553,-0.387873709030266,1.16992762616  
311,-0.331536498802355,0.740239276286022,NA  
"22186","ZNF233",0.341125932066361,1.37790492328387,3.03290540471936,0  
.454318463457443,0.649599628836418,NA  
"22187","ZNF229",0.311841710803895,0.171849028305229,2.65045670284036,  
0.064837515784003,0.948303371003042,NA  
"22188","AC243964.3",0.272243772837683,0.0571453309233634,2.7625042087  
2225,0.0206860611263267,0.983496088251948,NA  
"22189","AC011481.2",1.88994947854835,-0.0936750812961283,1.0234977806  
1283,-0.0915244596231944,0.927075871829054,NA  
"22190","APOC2",0.728699937663074,-1.78479128166116,1.91557562594608,-  
0.93172582564036,0.351478236273568,NA  
"22191","AC011481.1",0,NA,NA,NA,NA,NA  
"22192","ZNF296",0.803452360651901,1.71293002199108,1.57374135817112,1  
.08844443408523,0.276398954212482,NA  
"22193","NKPD1",0.0534622507802646,-0.0533240139618838,3.3524751975373  
8,-0.015905863822961,0.987309491940711,NA  
"22194","EXOC3L2",0.362163077772823,-0.055843711240554,2.5915710022774  
, -0.0215482080913392,0.982808347881005,NA  
"22195","CKM",0.633305103141611,-0.392581734363012,2.26525836033346,-0  
.173305500704662,0.862411300180448,NA  
"22196","GPR4",0,NA,NA,NA,NA,NA  
"22197","GIPR",0.340670597268764,-0.0351376964155961,3.04056675106248,  
-0.0115562983129108,0.990779613223969,NA

"22198", "DM1-  
AS", 1.05857190268088, 2.16118447953296, 1.48948176615281, 1.4509640390664  
9, 0.146789874042159, NA  
"22199", "AC092301.1", 1.1778764938852, 1.21659745249715, 1.93100162954178  
, 0.630034399704699, 0.528672077919623, NA  
"22200", "PGLYRP1", 0.167182390659274, 0.576034712544328, 3.34068880739852  
, 0.172429922616139, 0.863099549623161, NA  
"22201", "AC007785.3", 2.18155803186489, -0.238243637034027, 1.09406638759  
554, -0.217759762785165, 0.827616296841545, NA  
"22202", "AC007193.2", 0.102686272020481, -0.0533240139618846, 3.352475197  
53738, -0.0159058638229612, 0.987309491940711, NA  
"22203", "PNMA8C", 0.102686272020481, -0.0533240139618846, 3.3524751975373  
8, -0.0159058638229612, 0.987309491940711, NA  
"22204", "AC093503.2", 0.142120095111522, -0.0533240139618842, 3.352475197  
53738, -0.0159058638229611, 0.987309491940711, NA  
"22205", "NPAS1", 0.739910372292583, -0.19004321887427, 1.81003268199399, -  
0.104994357706797, 0.916380285872111, NA  
"22206", "SLC8A2", 0, NA, NA, NA, NA, NA  
"22207", "ZNF541", 0.650549804176376, 1.11426431595372, 1.71098535749838, 0  
.651241292668265, 0.514890738751166, NA  
"22208", "CRX", 0.102230937222884, -1.35173207482145, 3.35247519753738, -0.  
403204198442509, 0.686798011343181, NA  
"22209", "AC011466.1", 1.02617341574105, 1.89382991248574, 1.5182690532616  
2, 1.24736120282326, 0.212265085532549, NA  
"22210", "ZNF114-  
AS1", 0.102686272020481, -0.0533240139618846, 3.35247519753738, -0.0159058  
638229612, 0.987309491940711, NA  
"22211", "ZNF114", 0.826849740729813, 0.204021314863859, 1.83659513874159,  
0.111086711796293, 0.911547585970497, NA  
"22212", "CCDC114", 0.244806367132003, 0.695807100884759, 3.33664907448574  
, 0.208534696143316, 0.834811494458112, NA  
"22213", "AC008403.2", 0.155693188003149, -0.774663427007578, 3.3524751975  
3738, -0.231072082972193, 0.817258802814835, NA  
"22214", "AC008403.3", 0.102686272020481, -0.0533240139618846, 3.352475197  
53738, -0.0159058638229612, 0.987309491940711, NA  
"22215", "FUT2", 0.836948949695944, 0.863673819005337, 1.65457834183317, 0.  
521990284272935, 0.601677095265667, NA  
"22216", "IZUM01", 0, NA, NA, NA, NA, NA  
"22217", "FUT1", 0, NA, NA, NA, NA, NA  
"22218", "TULP2", 0.782061123436626, 0.786627213365024, 1.92132473178122, 0  
.409419188934167, 0.682232059950866, NA  
"22219", "AC026803.1", 1.3487594212879, 0.247793061589767, 1.3573645074240  
4, 0.182554546132947, 0.855147551821552, NA  
"22220", "DHDH", 0.322300538018157, -0.774667165166207, 3.0144598883595, -0  
.256983736342828, 0.797191328075268, NA  
"22221", "NTF4", 0.102686272020481, -0.0533240139618846, 3.35247519753738,  
-0.0159058638229612, 0.987309491940711, NA  
"22222", "KCNA7", 0.221906102043421, 0.695830468846429, 3.33747149841039, 0  
.208490310457437, 0.834846147549618, NA  
"22223", "C19orf73", 1.13841312954824, -1.30498983870312, 1.70460677684272

, -0.765566496878669, 0.443934285690049, NA  
"22224", "HRC", 0, NA, NA, NA, NA, NA  
"22225", "AC011450.1", 0.811730230427644, -0.5740945843341, 1.691580444182  
91, -0.339383554774663, 0.73432080562229, NA  
"22226", "DKKL1", 2.19299587216898, -0.932697103054776, 1.08298911175044, -  
0.861224820208259, 0.389114232540999, NA  
"22227", "PRRG2", 1.48888662511642, -0.756182569215327, 1.33688181654784, -  
0.565631576295933, 0.571644257876592, NA  
"22228", "ADM5", 0.410125638409157, 0.431277444122575, 2.22733307136502, 0.  
193629524774337, 0.846465978260939, NA  
"22229", "IL4I1", 1.92076748704347, -0.187079548197593, 1.0738308932246, -0.  
.174216954809162, 0.86169496128483, NA  
"22230", "SIGLEC11", 0.0534622507802646, -0.0533240139618838, 3.3524751975  
3738, -0.015905863822961, 0.987309491940711, NA  
"22231", "AC010624.1", 0.786840876994506, -0.532167262795818, 1.6260682166  
8141, -0.327272409199351, 0.743461858684628, NA  
"22232", "MYH14", 0.506591527324156, 0.964296520217758, 1.88694319106877, 0.  
.511036328375937, 0.609325618928538, NA  
"22233", "KCNC3", 0.62149498758338, -0.649402232921143, 2.04023831512358, -  
0.318297244055927, 0.750259474620882, NA  
"22234", "NAPSA", 2.0539936859356, 0.193642902040241, 0.984307424838305, 0.  
196730103983571, 0.844038750862084, NA  
"22235", "SPIB", 0.866600265792433, -0.379749925405489, 1.54810504186857, -  
0.24529984409012, 0.806224272461122, NA  
"22236", "FAM71E1", 1.21520823499151, -0.61778693353368, 1.24438851224631,  
-0.496458242304472, 0.619571141858139, NA  
"22237", "AC020909.3", 0.413371604734378, -0.0619360379224834, 2.490546605  
30835, -0.0248684516846514, 0.980159891356585, NA  
"22238", "AC020909.2", 0.102230937222884, -1.35173207482145, 3.35247519753  
738, -0.403204198442509, 0.686798011343181, NA  
"22239", "C19orf81", 0.168565237602375, -1.35173207482145, 3.3524751975373  
8, -0.40320419844251, 0.686798011343181, NA  
"22240", "AC010325.1", 0.372074662261217, -1.51013692977749, 2.50487025473  
007, -0.602880299658564, 0.546588322459919, NA  
"22241", "AC010325.2", 0, NA, NA, NA, NA, NA  
"22242", "KLK10", 0.168565237602375, -1.35173207482145, 3.35247519753738, -  
0.40320419844251, 0.686798011343181, NA  
"22243", "KLK13", 0.235916738838116, 1.05444670223757, 3.3199924034585, 0.3  
176051551019, 0.750784463269352, NA  
"22244", "SIGLEC9", 0.915193851387888, -2.34748101690762, 1.76777404592604  
, -1.32793046844282, 0.184201078166864, NA  
"22245", "SIGLEC7", 0.708745047330114, -0.320167072024635, 2.0008355520238  
, -0.160016684879871, 0.872867930942083, NA  
"22246", "CD33", 2.13560909067709, -1.47332808889238, 1.08174949887909, -1.  
36198638448092, 0.173202182069759, NA  
"22247", "IGLON5", 0, NA, NA, NA, NA, NA  
"22248", "AC008750.5", 0, NA, NA, NA, NA, NA  
"22249", "LIM2", 0, NA, NA, NA, NA, NA  
"22250", "C19orf84", 0, NA, NA, NA, NA, NA  
"22251", "SIGLEC10", 0.598097607505467, 1.18890558134022, 2.02847101652445

,0.586109227913581,0.557802115476862,NA  
"22252","AC008750.2",0,NA,NA,NA,NA,NA  
"22253","SIGLEC8",0.102230937222884,-1.35173207482145,3.35247519753738  
, -0.403204198442509,0.686798011343181,NA  
"22254","SIGLEC12",0.100823152638361,-1.35173207482145,3.3524751975373  
8, -0.40320419844251,0.686798011343181,NA  
"22255","SIGLEC6",0.813138015012168,-0.569688906851247,1.7188092214146  
9, -0.331443943721896,0.740309176568847,NA  
"22256","SIGLEC5",0.183715948661733,0.576034712544328,3.34068880739852  
,0.172429922616139,0.863099549623161,NA  
"22257","SPACA6P-  
AS",1.83190552098579,-0.170792623296038,1.40834202391279,-0.1212721202  
6346,0.903475501816644,NA  
"22258","FPR2",1.21739498852337,0.571711551111969,1.46952410963855,0.3  
89045370104605,0.69724258444435,NA  
"22259","AC018755.5",0.102230937222884,-1.35173207482145,3.35247519753  
738, -0.403204198442509,0.686798011343181,NA  
"22260","ZNF350-  
AS1",0.244806367132003,0.695807100884759,3.33664907448574,0.2085346961  
43316,0.834811494458112,NA  
"22261","AC010320.1",1.4881631508615,0.133131157531894,1.3517559484638  
9,0.0984875692118692,0.921545142301951,NA  
"22262","AC010320.2",0,NA,NA,NA,NA,NA  
"22263","AC022150.1",0.142120095111522,-0.0533240139618842,3.352475197  
53738,-0.0159058638229611,0.987309491940711,NA  
"22264","AC022150.2",0,NA,NA,NA,NA,NA  
"22265","ZNF320",2.33557751200352,0.563840415968266,1.03620542942818,0  
.544139607799018,0.58634540643738,NA  
"22266","NLRP12",0.168565237602375,-1.35173207482145,3.35247519753738,  
-0.40320419844251,0.686798011343181,NA  
"22267","AC008440.1",0.0644961186387932,-0.0533240139618838,3.35247519  
753738,-0.015905863822961,0.987309491940711,NA  
"22268","CACNG8",0.100823152638361,-1.35173207482145,3.35247519753738,  
-0.40320419844251,0.686798011343181,NA  
"22269","VSTM1",0.270796174825259,-2.10201442494854,3.17084321545501,-  
0.662919697417743,0.507381985665671,NA  
"22270","AC245052.4",0,NA,NA,NA,NA,NA  
"22271","TMC4",1.80964020131631,-0.303357281997076,1.31727128679246,-0  
.230292184334897,0.817864733415418,NA  
"22272","LILRA5",0.797351011729732,0.808988032692091,1.74229633126833,  
0.464322869866332,0.642416441119304,NA  
"22273","LILRA4",0.302935778684673,1.24376146070571,3.12847474347089,0  
.397561611549346,0.690953362451962,NA  
"22274","TTYH1",1.5658470912713,-0.719185990744579,1.39901635726656,-0  
.514065462500914,0.607206223301159,NA  
"22275","AC245884.10",0,NA,NA,NA,NA,NA  
"22276","AC245884.8",0.636100136409419,-0.731571340089126,1.9748228383  
1454,-0.370449098468753,0.711047896450555,NA  
"22277","LAIR2",1.69863634622117,0.875555130461569,1.34856399773567,0.  
649249966580512,0.516176819809419,NA

"22278", "LILRA2", 0.82176012640955, -1.27999811582977, 1.59249402801844, -0.803769491947476, 0.421530112066695, NA  
"22279", "LILRA1", 0.692510400404704, -1.02767768914459, 1.7519716360741, -0.586583519952104, 0.557483453517278, NA  
"22280", "LILRB1", 1.11708091198983, -0.280392929811366, 1.47358113605794, -0.190279939767322, 0.849089772222186, NA  
"22281", "KIR2DL3", 0, NA, NA, NA, NA, NA  
"22282", "KIR2DL1", 0.3088471509732, -0.151783800255383, 2.666328088474, -0.0569261528284959, 0.954604021144224, NA  
"22283", "KIR2DL4", 0.11921983002294, -0.0533240139618846, 3.35247519753738, -0.0159058638229612, 0.987309491940711, NA  
"22284", "KIR3DL1", 0.172682080803205, 0.494635591052761, 3.34300496985029, 0.147961368742719, 0.882373255878367, NA  
"22285", "KIR3DL2", 0.388633157905099, 0.432636944008462, 2.25154176219256, 0.192151418762563, 0.84762359891593, NA  
"22286", "FCAR", 0.167182390659274, 0.576034712544328, 3.34068880739852, 0.172429922616139, 0.863099549623161, NA  
"22287", "NCR1", 0.454512123486993, -0.895655134296266, 2.15226028124468, -0.416146291459831, 0.67730295801868, NA  
"22288", "NLRP7", 0, NA, NA, NA, NA, NA  
"22289", "NLRP2", 0.100823152638361, -1.35173207482145, 3.35247519753738, -0.40320419844251, 0.686798011343181, NA  
"22290", "AC011476.3", 0.388633157905099, 0.432636944008462, 2.25154176219256, 0.192151418762563, 0.84762359891593, NA  
"22291", "GP6", 0.23843966004588, 0.69583062743856, 3.33747149429751, 0.208490358233014, 0.834846110249776, NA  
"22292", "AC010327.8", 0.266142423915515, -1.3728236824524, 3.23491314131495, -0.424377293139429, 0.671290677960157, NA  
"22293", "TNNT1", 0.168565237602375, -1.35173207482145, 3.35247519753738, -0.40320419844251, 0.686798011343181, NA  
"22294", "SYT5", 0.100823152638361, -1.35173207482145, 3.35247519753738, -0.40320419844251, 0.686798011343181, NA  
"22295", "AC010327.5", 1.39176841896556, 1.35652136253999, 1.60488617264713, 0.845244594700767, 0.397974288427701, NA  
"22296", "BRSK1", 0.582165708281247, 2.1947105711121, 2.21918230251255, 0.988972635834042, 0.322676530166856, NA  
"22297", "TMEM150B", 0, NA, NA, NA, NA, NA  
"22298", "AC020922.4", 0.0644961186387932, -0.0533240139618838, 3.35247519753738, -0.015905863822961, 0.987309491940711, NA  
"22299", "COX6B2", 0, NA, NA, NA, NA, NA  
"22300", "AC008735.4", 0.258834794821227, 1.09609913055011, 3.27112624850828, 0.335083102050849, 0.737562399373167, NA  
"22301", "AC010525.1", 0, NA, NA, NA, NA, NA  
"22302", "NLRP4", 0, NA, NA, NA, NA, NA  
"22303", "EDDM13", 0.672419693823095, -1.03758425223339, 2.27863368897306, -0.455353687279595, 0.648854808060785, NA  
"22304", "AC006116.5", 0.80225215162683, -1.54973695192469, 1.69758757427773, -0.912905452070156, 0.361292269841396, NA  
"22305", "AC006116.8", 0.635026300283273, 1.3278483187206, 1.98770101245618, 0.66803221933252, 0.504113026216962, NA

"22306", "AC006116.6", 0.256971675439106, -0.226175799809587, 2.79502848435046, -0.0809207494935953, 0.935504978368658, NA  
"22307", "AC006116.10", 0, NA, NA, NA, NA, NA  
"22308", "AC006116.11", 0.102686272020481, -0.0533240139618846, 3.35247519753738, -0.0159058638229612, 0.987309491940711, NA  
"22309", "AC005498.2", 1.14082085319683, 0.620487976527522, 1.46174785521584, 0.424483589501078, 0.671213170894283, NA  
"22310", "DUXA", 1.67233712377447, -1.69583559304277, 1.21219374195789, -1.39898065329369, 0.161818784723914, NA  
"22311", "AC004076.2", 1.56839841035826, 0.777003057754995, 1.1305787218086, 0.687261349224768, 0.491918050449691, NA  
"22312", "VN1R1", 0.767675644223909, 1.50821321281469, 1.91390580220853, 0.788028967295206, 0.430679762241628, NA  
"22313", "ZNF154", 0.42806698099614, 0.480112305801356, 2.21664668238809, 0.216593970349893, 0.828524785164299, NA  
"22314", "ZNF671", 0.155693188003149, -0.774663427007578, 3.35247519753738, -0.231072082972193, 0.817258802814835, NA  
"22315", "AC010326.3", 1.04931245714628, -0.955877694462343, 1.63724241386912, -0.583833943199298, 0.55933203911006, NA  
"22316", "AC008751.3", 0, NA, NA, NA, NA, NA  
"22317", "AC020915.1", 0.308058816061443, 1.2759273050851, 3.31959886931736, 0.384361892901681, 0.700710240394097, NA  
"22318", "AC012313.2", 0.273505233441565, -0.226106766776126, 2.74490218220006, -0.082373342205914, 0.934349833830783, NA  
"22319", "AC012313.6", 1.61448851625197, 0.742559050312316, 1.19365608200125, 0.622087937647301, 0.533884046127501, NA  
"22320", "LINC02560", 0.0644961186387932, -0.0533240139618838, 3.35247519753738, -0.015905863822961, 0.987309491940711, NA  
"22321", "AC012313.5", 0.953044199732881, 0.459141315172129, 1.42986449961748, 0.321108269556283, 0.748128343697157, NA  
"22322", "AC012313.8", 0.630788070743225, 1.29000588424375, 2.31395849321809, 0.557488774333932, 0.577193526740076, NA  
"22323", "AC012313.7", 0.989072322655399, 0.505347365430516, 1.68987619005119, 0.299044017784053, 0.764906460024242, NA  
"22324", "AC012313.9", 0.0534622507802646, -0.0533240139618838, 3.35247519753738, -0.015905863822961, 0.987309491940711, NA  
"22325", "TCF15", 0.306692811668653, -2.34839005368482, 3.32010114242453, -0.707324853353681, 0.479364624090735, NA  
"22326", "ANGPT4", 0.142120095111522, -0.0533240139618842, 3.35247519753738, -0.0159058638229611, 0.987309491940711, NA  
"22327", "RSP04", 0.226144331583469, 0.885845475851209, 3.33280882803988, 0.265795466094045, 0.790396735192843, NA  
"22328", "C20orf202", 0.527646463925147, -0.0604133997871304, 2.12939642465267, -0.0283711379843162, 0.977366143483478, NA  
"22329", "AL136531.1", 0.971541942124172, -0.577111760185777, 1.49384923927753, -0.38632530312422, 0.69925576317404, NA  
"22330", "SIRPB2", 0.221450767245824, -0.774663427007578, 3.35247519753738, -0.231072082972194, 0.817258802814834, NA  
"22331", "SIRPD", 0, NA, NA, NA, NA, NA  
"22332", "SIRPB1", 1.71992341395392, -0.895781967523962, 1.14240550896037,

-0.784119089498403,0.432970235214045,NA  
"22333","SIRPG",0.716433386067186,0.102232424135214,1.81529079036527,0  
.0563173815885682,0.955088972304081,NA  
"22334","AL359916.1",0.244806367132003,0.695807100884759,3.33664907448  
574,0.208534696143316,0.834811494458112,NA  
"22335","AL121899.4",0,NA,NA,NA,NA,NA  
"22336","AL121899.1",0.203054089861245,-1.95461545718866,3.33573296423  
696,-0.585962808817275,0.557900507779092,NA  
"22337","TGM3",0,NA,NA,NA,NA,NA  
"22338","TMC2",0.462876746157115,-0.579162354331958,2.43902372957171,-  
0.237456629597309,0.812302561626373,NA  
"22339","C20orf141",0.363896176999636,0.44456811936779,2.5535747067833  
4,0.174096382685352,0.861789715988516,NA  
"22340","TMEM239",0.306195696679323,-0.0320258052725539,3.128238498989  
19,-0.0102376482109348,0.991831681239967,NA  
"22341","GNRH2",1.48627945885224,1.89001296561555,1.32568161600857,1.4  
2569146527512,0.153957421181832,NA  
"22342","UBOX5-  
AS1",0.102686272020481,-0.0533240139618846,3.35247519753738,-0.0159058  
638229612,0.987309491940711,NA  
"22343","AL109976.1",0.156148522800746,0.494635591052761,3.34300496985  
029,0.147961368742719,0.882373255878367,NA  
"22344","SPEF1",0.685992786714722,-1.63864433784956,1.80352536429934,-  
0.908578482058754,0.363572669188039,NA  
"22345","LINC01730",0.982008424206398,-0.613511303376451,1.61580016878  
881,-0.379695036073882,0.70417180535416,NA  
"22346","AL031670.1",0.166727055861678,-0.774663427007578,3.3524751975  
3738,-0.231072082972193,0.817258802814835,NA  
"22347","AL133396.2",0.102230937222884,-1.35173207482145,3.35247519753  
738,-0.403204198442509,0.686798011343181,NA  
"22348","AL121890.3",0.323681704468709,-1.38551320655902,3.03285912081  
125,-0.456834014165622,0.647790355428191,NA  
"22349","AL121890.2",0.339262812684241,-0.0349910483728248,3.044545146  
73679,-0.0114930298899752,0.990830090769536,NA  
"22350","AL121890.5",1.4755542164186,0.0955761762401931,1.169876777840  
5,0.0816976437609261,0.93488715210407,NA  
"22351","AL121890.4",0.934112946086977,-0.00982448306923591,1.59516422  
958197,-0.00615891635923312,0.995085926792687,NA  
"22352","AL121757.2",0.100823152638361,-1.35173207482145,3.35247519753  
738,-0.40320419844251,0.686798011343181,NA  
"22353","AL121757.1",0.102686272020481,-0.0533240139618846,3.352475197  
53738,-0.0159058638229612,0.987309491940711,NA  
"22354","AL109935.1",0,NA,NA,NA,NA,NA  
"22355","AL035461.2",1.98788127438696,-1.29280799029888,1.188044765756  
83,-1.08818120963255,0.276515118254706,NA  
"22356","FERMT1",0.678750631379559,1.43782611897984,2.28134447856336,0  
.630253840439425,0.528528518354804,NA  
"22357","AL021396.1",0.195582345891787,0.494635591052761,3.34300496985  
029,0.147961368742719,0.882373255878367,NA  
"22358","PLCB4",0.370236480520519,-0.776097354626079,2.25816971304894,



-0.343684245759458,0.731083760326458,NA  
"22359","LAMP5",0.322850641021,-1.51171106944378,2.60963996021438,-0.5  
79279552923307,0.562400559885429,NA  
"22360","ANKEF1",1.45888623652065,-0.618137219949109,1.19723495331675,  
-0.51630402055725,0.605642088593297,NA  
"22361","SNAP25",1.47293715260661,-3.28344563809009,1.6018142127509,-2  
.04982925732144,0.0403810954875528,NA  
"22362","LINC01752",1.09088147799378,-0.287575040888467,1.517257366484  
42,-0.189536097988963,0.849672665694316,NA  
"22363","AL158042.1",0.837876461841448,-1.03017918974401,1.61175776611  
294,-0.639165023059565,0.522715583380465,NA  
"22364","AL035448.1",0.322300538018157,-0.774667165166207,3.0144598883  
595,-0.256983736342828,0.797191328075268,NA  
"22365","AL109838.1",0.102686272020481,-0.0533240139618846,3.352475197  
53738,-0.0159058638229612,0.987309491940711,NA  
"22366","ISM1-  
AS1",0.79469275251332,2.61611801815911,1.6775297991835,1.5595061377940  
6,0.118876632998097,NA  
"22367","AL050320.1",0.408881968699804,0.547611082492514,2.92451725942  
926,0.187248367479077,0.851465903655842,NA  
"22368","AL121782.1",0.171420620199322,0.765902268429694,3.33569101336  
987,0.22960827767316,0.818396174063793,NA  
"22369","SEL1L2",0.390592725985015,-1.78963817496023,2.89500967362667,  
-0.618180378208648,0.536456442907482,NA  
"22370","FLRT3",1.22256442355985,2.37519986423521,1.66667520700373,1.4  
2511261597587,0.154124650383933,NA  
"22371","AL079338.1",0,NA,NA,NA,NA,NA  
"22372","AL049794.1",0.102686272020481,-0.0533240139618846,3.352475197  
53738,-0.0159058638229612,0.987309491940711,NA  
"22373","AL132765.2",0.221450767245824,-0.774663427007578,3.3524751975  
3738,-0.231072082972194,0.817258802814834,NA  
"22374","AL035045.1",0,NA,NA,NA,NA,NA  
"22375","AL121900.1",0,NA,NA,NA,NA,NA  
"22376","LINC00652",0.168565237602375,-1.35173207482145,3.352475197537  
38,-0.40320419844251,0.686798011343181,NA  
"22377","AL121761.1",1.12454094729749,-1.43836456227934,1.577390197566  
34,-0.91186351005509,0.361840572533424,NA  
"22378","CFAP61",0.451027202563056,1.87845181727321,2.36425553959725,0  
.794521482899096,0.426891907537611,NA  
"22379","INSM1",0.0534622507802646,-0.0533240139618838,3.3524751975373  
8,-0.015905863822961,0.987309491940711,NA  
"22380","KIZ-  
AS1",0.324592374063902,1.32629053141379,3.07347552214963,0.43152793046  
6861,0.666084548480396,NA  
"22381","PAX1",0.106924501560529,0.385965786494404,3.34626872025989,0.  
115342137395477,0.908173940404949,NA  
"22382","AL390037.1",0.11921983002294,-0.0533240139618846,3.3524751975  
3738,-0.0159058638229612,0.987309491940711,NA  
"22383","AL035661.1",0.106924501560529,0.385965786494404,3.34626872025  
989,0.115342137395477,0.908173940404949,NA

"22384", "AL035661.2", 0.0644961186387932, -0.0533240139618838, 3.35247519  
753738, -0.015905863822961, 0.987309491940711, NA  
"22385", "AL035252.5", 0.415625328553087, 0.413254687229323, 2.22339966169  
412, 0.185866128500912, 0.852549744857659, NA  
"22386", "AL035252.3", 1.85637185883682, 0.802982546558174, 1.358605608221  
4, 0.591034323499805, 0.554497423393636, NA  
"22387", "AL121772.1", 0.30528502708413, -2.35094355977522, 3.025282911707  
48, -0.777098746922923, 0.437100513227499, NA  
"22388", "AL121772.2", 0.102686272020481, -0.0533240139618846, 3.352475197  
53738, -0.0159058638229612, 0.987309491940711, NA  
"22389", "AL121772.3", 0.684371707862708, 0.264082124597288, 1.96775936662  
779, 0.1342044810336, 0.893240882616978, NA  
"22390", "GINS1", 1.99833626237612, -1.74000202099095, 1.0176334717841, -1.  
70985140449478, 0.0872933545625959, NA  
"22391", "AL031673.1", 1.52304112092483, -0.743359403470292, 1.20931336222  
729, -0.61469543518579, 0.538755875013527, NA  
"22392", "FAM182B", 1.51275102605371, 2.65717191707234, 1.48394434479369, 1.  
79061426824721, 0.0733552157761038, NA  
"22393", "DEFB124", 0.645003174565967, -0.451168164792344, 2.0135758616529  
5, -0.224063157184443, 0.822708159950468, NA  
"22394", "LINC00028", 0.559600123799373, -0.844364336569349, 2.08693235760  
036, -0.404595929280733, 0.685774551256064, NA  
"22395", "AL110115.1", 0.203054089861245, -1.95461545718866, 3.33573296423  
696, -0.585962808817275, 0.557900507779092, NA  
"22396", "HM13-  
IT1", 1.11666446650309, -0.24393477870948, 1.39593726019817, -0.1747462337  
05984, 0.861279037418133, NA  
"22397", "HM13-  
AS1", 0.713893946465355, 1.44714874641479, 1.78548885300606, 0.81050561809  
9132, 0.417649637423829, NA  
"22398", "AL110115.2", 0.5541088529028, 2.0468080806695, 2.28573516491984,  
0.895470355482448, 0.370535705802406, NA  
"22399", "COX4I2", 1.99250370241386, -1.01138882699001, 1.26921244292357, -  
0.796863308919604, 0.425530422089742, NA  
"22400", "ABALON", 0.425536913041481, -0.954245016814906, 2.17341335819663  
, -0.439053626506962, 0.660622679653843, NA  
"22401", "TPX2", 2.04291562361731, -0.110637043132434, 0.984340281266301, -  
0.112397150902029, 0.91050851426535, NA  
"22402", "TTLL9", 0.324592374063902, 1.32629053141379, 3.07347552214963, 0.  
431527930466861, 0.666084548480396, NA  
"22403", "CCM2L", 0.346581969557291, -1.38612727586565, 2.96955222737921, -  
0.466779894654011, 0.640657361748092, NA  
"22404", "AL049539.1", 0.244806367132003, 0.695807100884759, 3.33664907448  
574, 0.208534696143316, 0.834811494458112, NA  
"22405", "AL121583.1", 0.102686272020481, -0.0533240139618846, 3.352475197  
53738, -0.0159058638229612, 0.987309491940711, NA  
"22406", "AL034550.2", 0.102686272020481, -0.0533240139618846, 3.352475197  
53738, -0.0159058638229612, 0.987309491940711, NA  
"22407", "C20orf203", 0.26007846453058, 0.946467962785628, 2.7571340531642  
7, 0.343279631869694, 0.731388102297512, NA

"22408", "AL035071.2", 0, NA, NA, NA, NA, NA  
"22409", "BPIFB4", 1.12954899222529, 3.12897763733126, 2.70506680691231, 1.15670993017094, 0.247390891241306, NA  
"22410", "BPIFB1", 0, NA, NA, NA, NA, NA  
"22411", "AL121906.2", 0.256971675439106, -0.226175799809587, 2.79502848435046, -0.0809207494935953, 0.935504978368658, NA  
"22412", "C20orf144", 0.606410922654626, -1.12556100054206, 2.30932290539366, -0.487398708042604, 0.625975808936143, NA  
"22413", "ZNF341-AS1", 0.657591150989661, -0.323184013606904, 1.98605913680698, -0.162726279201581, 0.870733954958365, NA  
"22414", "AL035458.2", 0.42876970478109, -1.06229143512552, 2.45486111129827, -0.432729750060572, 0.665211114150325, NA  
"22415", "ITCH-AS1", 0.905427489640075, 0.916861872188974, 1.5629840970946, 0.586609853480475, 0.557465763441688, NA  
"22416", "AL109923.1", 0.853672484332044, 2.7072948981148, 1.80537975929297, 1.49957087099228, 0.133725597832929, NA  
"22417", "AL109824.1", 0.23843966004588, 0.69583062743856, 3.33747149429751, 0.208490358233014, 0.834846110249776, NA  
"22418", "MMP24", 0.646206492122443, 1.40272652146989, 1.92342766809754, 0.729284778801858, 0.465827481118121, NA  
"22419", "GDF5", 0.355931708695347, -1.7667699881487, 2.95338520765146, -0.598218608115003, 0.549694076769176, NA  
"22420", "F0393401.1", 1.16596622943341, 0.261940163899815, 1.45662325630934, 0.179826981867291, 0.857288400441117, NA  
"22421", "SPAG4", 1.80878522027395, -0.217539622400576, 1.08948258212824, -0.199672418787665, 0.841736785989445, NA  
"22422", "AL121895.1", 0.352281186264108, -0.153285691053076, 2.56347680645525, -0.0597960124574085, 0.952318101493915, NA  
"22423", "AL121895.2", 0.827861475331718, -0.307924542014981, 1.59552583452663, -0.192992514036187, 0.846964830814767, NA  
"22424", "DLGAP4-AS1", 0.341125932066361, 1.37790492328387, 3.03290540471936, 0.454318463457443, 0.649599628836418, NA  
"22425", "TLDC2", 0.98315967786641, 0.248353419375073, 1.50026734002504, 0.165539442704211, 0.868519407266726, NA  
"22426", "AL109614.1", 0.0534622507802646, -0.0533240139618838, 3.35247519753738, -0.015905863822961, 0.987309491940711, NA  
"22427", "VSTM2L", 0.426360285334567, 1.65695407184322, 3.30080049096878, 0.501985526352398, 0.615677702148379, NA  
"22428", "AL359555.2", 0.816664215287821, -1.92383106850817, 1.88860295886107, -1.01865299928808, 0.308367733429421, NA  
"22429", "AL391095.1", 0.510202236327495, -2.14964618719501, 2.26812517576353, -0.947763470096561, 0.343249881156763, NA  
"22430", "SLC32A1", 0.168565237602375, -1.35173207482145, 3.35247519753738, -0.40320419844251, 0.686798011343181, NA  
"22431", "PPP1R16B", 1.33164914214862, 0.416137148271788, 1.39553792951991, 0.298191213201167, 0.765557227765923, NA  
"22432", "FAM83D", 0.68462697429065, 1.4309227345006, 2.23069810370052, 0.6

41468575297942,0.521218291447811,NA  
"22433","AL023803.2",0.11921983002294,-0.0533240139618846,3.3524751975  
3738,-0.0159058638229612,0.987309491940711,NA  
"22434","AL023803.1",0,NA,NA,NA,NA,NA  
"22435","AL023803.3",0.168565237602375,-1.35173207482145,3.35247519753  
738,-0.40320419844251,0.686798011343181,NA  
"22436","AL035251.1",0,NA,NA,NA,NA,NA  
"22437","AL035665.1",0.32184520322056,-2.1004006767475,3.0000411347961  
3,-0.70012395909706,0.483849894373614,NA  
"22438","EMILIN3",0.307603481263847,-0.0321837065735757,3.123618821839  
01,-0.0103033399429408,0.99177926958558,NA  
"22439","AL031667.3",0.824198286435936,0.182360895844807,1.55361931930  
154,0.117378107737995,0.906560431631607,NA  
"22440","SGK2",0.847788046329842,-2.05525281953255,1.79888442255598,-1  
.14251521318546,0.25323992610432,NA  
"22441","Z98752.4",0.414363867949205,0.555913947657834,2.1696348801904  
8,0.256224654541426,0.797777372334948,NA  
"22442","MYBL2",0.608953950626165,0.94366175176076,2.0477154270783,0.4  
60836373688499,0.644916003246488,NA  
"22443","GDAP1L1",0.273505233441565,-0.226106766776126,2.7449021822000  
6,-0.082373342205914,0.934349833830783,NA  
"22444","RIMS4",0.195582345891787,0.494635591052761,3.34300496985029,0  
.147961368742719,0.882373255878367,NA  
"22445","AL008725.1",0,NA,NA,NA,NA,NA  
"22446","STK4-  
AS1",0.511624896698496,-1.68248426522855,2.30313798838326,-0.730518220  
668841,0.46507347964298,NA  
"22447","KCNS1",0.117958369419058,0.451348601316665,3.34428110054629,0  
.134961322851401,0.892642454377335,NA  
"22448","PI3",0.213849003121058,0.96816891762709,3.33094636315095,0.29  
0658813464423,0.771312274283839,NA  
"22449","AL021578.1",1.37078075934524,-0.860196475986053,1.38782954044  
375,-0.619814214151264,0.535380109425206,NA  
"22450","WFDC10A",0.102686272020481,-0.0533240139618846,3.352475197537  
38,-0.0159058638229612,0.987309491940711,NA  
"22451","WFDC10B",2.28649852457537,-2.00982220575966,1.05771693220551,  
-1.90015130188835,0.0574132668924232,NA  
"22452","WFDC13",0.226144331583469,0.885845475851209,3.33280882803988,  
0.265795466094045,0.790396735192843,NA  
"22453","UBE2C",1.15309893517244,-1.2141294441813,1.35492367395659,-0.  
896086966017687,0.370206317751741,NA  
"22454","SPATA25",0.231223174500471,-0.207595008908767,3.3424514271856  
2,-0.062108609034766,0.950476341218052,NA  
"22455","AL008726.1",0.269868662679755,1.13857476503723,3.232474371463  
12,0.352230098121977,0.724665706448339,NA  
"22456","SLC12A5",0.102230937222884,-1.35173207482145,3.35247519753738  
, -0.403204198442509,0.686798011343181,NA  
"22457","AL133520.1",1.03603806076297,-0.353730575879573,1.36883878973  
909,-0.25841653416835,0.796085457426941,NA  
"22458","AL031055.1",1.62366073065219,0.186578852536537,1.138416018439

64,0.163893383011485,0.869815076256409,NA  
"22459","AL031666.2",0.266142423915515,-1.3728236824524,3.234913141314  
95,-0.424377293139429,0.671290677960157,NA  
"22460","AL031666.3",1.450383384961,2.56138270194684,1.51122946275836,  
1.69489992424558,0.0900944069062126,NA  
"22461","AL031666.1",0,NA,NA,NA,NA,NA  
"22462","AL139351.3",0.102686272020481,-0.0533240139618846,3.352475197  
53738,-0.0159058638229612,0.987309491940711,NA  
"22463","AL035106.1",0.100823152638361,-1.35173207482145,3.35247519753  
738,-0.40320419844251,0.686798011343181,NA  
"22464","AL133342.1",0.955233172482267,-1.2488385932313,1.644751380674  
66,-0.759287153003658,0.447680800876358,NA  
"22465","LINC01275",1.11642825691108,1.3595278012058,1.49434877083561,  
0.909779448907086,0.362938834827319,NA  
"22466","LINC01271",0.168565237602375,-1.35173207482145,3.352475197537  
38,-0.40320419844251,0.686798011343181,NA  
"22467","AL133230.1",1.8269999824303,1.74913804507421,1.51744407176727  
,1.15268699362152,0.249038881835496,NA  
"22468","AL353653.1",0,NA,NA,NA,NA,NA  
"22469","KCNG1",0.219614265997676,-1.35173207482145,3.35247519753738,-  
0.40320419844251,0.686798011343181,NA  
"22470","SALL4",1.05047739351297,-0.733143510117007,1.51014559352547,-  
0.485478693749961,0.627336822725404,NA  
"22471","AL161945.1",1.73759392952164,-0.722912261989491,1.37020159899  
75,-0.527595546902299,0.597780084424262,NA  
"22472","AL391097.3",1.50305766829408,-1.28932936474038,1.279834933263  
87,-1.00741848126641,0.31373371375124,NA  
"22473","AL109930.1",0.90548566637318,-0.923900591269669,1.76603368675  
21,-0.523150038530016,0.600869846214591,NA  
"22474","AL354993.1",1.18177618288512,2.20703497024575,1.8445452308244  
5,1.19651984313732,0.231493759762569,NA  
"22475","AL157838.1",0.787013785423421,-0.207314440198759,1.6135423225  
3826,-0.128484042409643,0.897765925865634,NA  
"22476","AC005914.1",0.102686272020481,-0.0533240139618846,3.352475197  
53738,-0.0159058638229612,0.987309491940711,NA  
"22477","BCAS1",0.0644961186387932,-0.0533240139618838,3.3524751975373  
8,-0.015905863822961,0.987309491940711,NA  
"22478","CBLN4",1.3637650905313,3.421720657914,2.15783807520477,1.5857  
1706433037,0.112803506435954,NA  
"22479","GCNT7",0.322300538018157,-0.774667165166207,3.0144598883595,-  
0.256983736342828,0.797191328075268,NA  
"22480","FAM209A",0.671764474620669,0.506428781035933,1.97323228682544  
,0.256649348592751,0.797449475935582,NA  
"22481","FAM209B",1.29110680339205,-1.64009955322985,1.30086517623915,  
-1.26077596909115,0.207389574175119,NA  
"22482","AL109806.2",0.219614265997676,-1.35173207482145,3.35247519753  
738,-0.40320419844251,0.686798011343181,NA  
"22483","TFAP2C",1.83307709101462,-2.53731660621277,1.34725659133511,-  
1.88332098171317,0.0596568816546172,NA  
"22484","MTRNR2L3",0,NA,NA,NA,NA,NA

"22485", "AL109955.1", 0.408881968699804, 0.547611082492514, 2.92451725942  
926, 0.187248367479077, 0.851465903655842, NA  
"22486", "PCK1", 0, NA, NA, NA, NA, NA  
"22487", "AL035541.1", 0, NA, NA, NA, NA, NA  
"22488", "ZBP1", 2.27791878927492, 1.87953000059867, 1.14701021564844, 1.63  
863405482934, 0.101289495522478, NA  
"22489", "C20orf85", 0.398860899957342, 1.65813958143764, 2.84063207470389  
, 0.583722051230618, 0.559407328868272, NA  
"22490", "LINC01711", 0.764409121289133, 0.00124076739620528, 2.2213473942  
5846, 0.000558565220105737, 0.999554329457851, NA  
"22491", "AL132655.2", 0.209155438783414, -0.335374473295219, 3.3462686349  
1525, -0.10022341595528, 0.920166956363588, NA  
"22492", "GNAS-  
AS1", 2.08199239518485, 0.166382077989483, 1.09368576989452, 0.15212969078  
452, 0.879084646888393, NA  
"22493", "AL121917.1", 1.46737132941683, 0.400867303017054, 1.226885000042  
59, 0.326735841585103, 0.743867689097552, NA  
"22494", "AL121917.2", 0.788652440601231, -1.20948029634058, 1.60780505566  
527, -0.752255562376075, 0.451897385773939, NA  
"22495", "AL109840.2", 0.425397735807734, 0.605016634891276, 2.16395509345  
9, 0.279588350386782, 0.779793345844935, NA  
"22496", "TUBB1", 0.142120095111522, -0.0533240139618842, 3.35247519753738  
, -0.0159058638229611, 0.987309491940711, NA  
"22497", "EDN3", 0, NA, NA, NA, NA, NA  
"22498", "PHACTR3", 0.345629519770364, -0.054409187889382, 2.6169885026115  
4, -0.0207907630603215, 0.98341256615796, NA  
"22499", "SYCP2", 1.78854936949612, -0.0459643892716456, 1.16168922933335,  
-0.0395668549823974, 0.968438452627978, NA  
"22500", "CDH26", 0.889690507514657, 1.05288593875981, 1.67508387208307, 0.  
628557146485139, 0.529639023016485, NA  
"22501", "C20orf197", 0.142120095111522, -0.0533240139618842, 3.3524751975  
3738, -0.0159058638229611, 0.987309491940711, NA  
"22502", "MIR646HG", 1.31095894822575, -0.273382888811788, 1.4407986534881  
2, -0.189743992437762, 0.849509745990396, NA  
"22503", "CDH4", 0.436595718541433, 0.688634621332086, 2.43218704736904, 0.  
283133907022899, 0.777074190518369, NA  
"22504", "AL137077.2", 2.35346858401999, -0.319183116207188, 0.95644205002  
2202, -0.33371924226855, 0.738591427984839, NA  
"22505", "AL121832.3", 0.221450767245824, -0.774663427007578, 3.3524751975  
3738, -0.231072082972194, 0.817258802814834, NA  
"22506", "GATA5", 0, NA, NA, NA, NA, NA  
"22507", "BX640514.2", 0.102686272020481, -0.0533240139618846, 3.352475197  
53738, -0.0159058638229612, 0.987309491940711, NA  
"22508", "AL357033.1", 0, NA, NA, NA, NA, NA  
"22509", "SLC04A1", 0.968547382293477, -0.715292327164212, 1.5467032934230  
1, -0.462462535772585, 0.643749662664047, NA  
"22510", "AL357033.4", 1.28170496975362, -0.0931162222482771, 1.2704246390  
0827, -0.0732953528994577, 0.9415710896045, NA  
"22511", "AL357033.3", 0.102230937222884, -1.35173207482145, 3.35247519753  
738, -0.403204198442509, 0.686798011343181, NA

"22512", "SLC04A1-AS1", 0, NA, NA, NA, NA, NA  
"22513", "NTSR1", 0.11921983002294, -0.0533240139618846, 3.35247519753738,  
-0.0159058638229612, 0.987309491940711, NA  
"22514", "LINC00659", 0, NA, NA, NA, NA, NA  
"22515", "OGFR-  
AS1", 0.444497136977263, 0.332070552648044, 2.41454556845308, 0.1375292133  
58682, 0.890612503207026, NA  
"22516", "COL9A3", 0.741495467046206, 0.755344822048454, 1.75307716021116,  
0.430867984132241, 0.666564363816739, NA  
"22517", "AL117379.1", 1.99612891245805, -0.386452391395013, 1.11103073271  
653, -0.347832314638244, 0.727966119665044, NA  
"22518", "SLC17A9", 2.21073598699221, -1.25009072967269, 0.934849564283432  
, -1.33721058171632, 0.181153908804597, NA  
"22519", "AL096828.3", 0.532486352243434, 1.09099700659885, 2.022878629935  
12, 0.539328949574124, 0.589659896788464, NA  
"22520", "BIRC7", 0.714716590665707, -0.696327878497305, 1.74848793232886,  
-0.398245744578773, 0.690449049330143, NA  
"22521", "EEF1A2", 0.0644961186387932, -0.0533240139618838, 3.352475197537  
38, -0.015905863822961, 0.987309491940711, NA  
"22522", "PTK6", 0.512356575632042, -0.213101306988728, 1.94475737224618, -  
0.109577323130339, 0.912744595859955, NA  
"22523", "FNDC11", 2.11531391706743, -0.726461107264632, 0.96641066935918,  
-0.751710561873601, 0.452225137403879, NA  
"22524", "AL121845.4", 0.102230937222884, -1.35173207482145, 3.35247519753  
738, -0.403204198442509, 0.686798011343181, NA  
"22525", "AL121845.1", 0.350898339321007, 1.45361411466565, 2.545769154203  
14, 0.570992115394946, 0.568004987527943, NA  
"22526", "SAMD10", 0.324137039266305, -0.0524131773797337, 2.6534922959424  
2, -0.0197525266833754, 0.984240788704199, NA  
"22527", "C20orf204", 0.582352384414765, 0.127223759975557, 1.750934461295  
86, 0.0726604923187122, 0.942076287971941, NA  
"22528", "SOX18", 1.0138626647217, -3.99558209173651, 2.05202538388525, -1.  
94714067531239, 0.0515178716736895, NA  
"22529", "LKAAEAR1", 0.823758041993549, -1.0213231087996, 1.68814520009877  
, -0.604997193807647, 0.545180861259548, NA  
"22530", "FP565260.3", 1.23858844528108, 0.97110358309807, 2.0291237648255  
6, 0.478582726165819, 0.632235509462321, NA  
"22531", "CU633967.1", 2.14727887761137, -0.156194658203046, 1.14461169024  
204, -0.136460827313424, 0.891456990089042, NA  
"22532", "FP236315.1", 0.0644961186387932, -0.0533240139618838, 3.35247519  
753738, -0.015905863822961, 0.987309491940711, NA  
"22533", "SIK1B", 1.03790096557635, 0.704862014611292, 1.49779993856868, 0.  
470598239765498, 0.637927664883785, NA  
"22534", "CU633906.5", 1.29281604057729, 2.53982583336432, 1.4380992183933  
4, 1.76609916817967, 0.0773792130131383, NA  
"22535", "FP236241.1", 0.311841710803895, 0.171849028305229, 2.65045670284  
036, 0.064837515784003, 0.948303371003042, NA  
"22536", "SMIM11B", 1.82940438703435, 0.154303590249472, 1.02305049819678,  
0.150826953822363, 0.88011222341598, NA  
"22537", "FAM243B", 0, NA, NA, NA, NA, NA

"22538", "FP671120.4", 0.168565237602375, -1.35173207482145, 3.35247519753738, -0.40320419844251, 0.686798011343181, NA  
"22539", "FP671120.7", 0.582053473337716, 1.07319383484141, 2.34946581528254, 0.456782059930653, 0.647827701774742, NA  
"22540", "FP236383.3", 0.26007846453058, 0.946467962785628, 2.75713405316427, 0.343279631869694, 0.731388102297512, NA  
"22541", "FP236383.4", 1.59488774162613, 0.531316266267476, 1.32772935629686, 0.400169103550861, 0.68903196941547, NA  
"22542", "LINC01666", 0.166727055861678, -0.774663427007578, 3.35247519753738, -0.231072082972193, 0.817258802814835, NA  
"22543", "RBM11", 0, NA, NA, NA, NA, NA  
"22544", "AF127936.2", 0.411508485352258, -1.50901158931784, 2.43705229160723, -0.619195408532927, 0.535787636238475, NA  
"22545", "AF127577.1", 0.203509424658842, -0.774663427007579, 3.35247519753738, -0.231072082972194, 0.817258802814834, NA  
"22546", "AF127577.2", 0, NA, NA, NA, NA, NA  
"22547", "AP001172.1", 0.675867907958838, 1.38611220736441, 1.79110256252532, 0.773887680340366, 0.438997215561508, NA  
"22548", "CXADR", 0, NA, NA, NA, NA, NA  
"22549", "C21orf91-OT1", 0.100823152638361, -1.35173207482145, 3.35247519753738, -0.40320419844251, 0.686798011343181, NA  
"22550", "AL109761.1", 0, NA, NA, NA, NA, NA  
"22551", "CHODL", 2.25572324461619, -1.38965365108783, 1.05285250462684, -1.3198939499891, 0.186870427815453, NA  
"22552", "LINC00158", 0.154285403418625, -0.774663427007578, 3.35247519753738, -0.231072082972193, 0.817258802814835, NA  
"22553", "AP000223.1", 1.14663284357216, -0.463379281287666, 1.5943126762166, -0.290645171552731, 0.771322708768492, NA  
"22554", "AP000224.1", 0.204917209243366, -0.774663427007578, 3.35247519753738, -0.231072082972194, 0.817258802814834, NA  
"22555", "AP001596.1", 0.156148522800746, 0.494635591052761, 3.34300496985029, 0.147961368742719, 0.882373255878367, NA  
"22556", "CYR1", 0.375307454000825, -1.51672328914404, 2.50822563158042, -0.604699700875141, 0.545378546938903, NA  
"22557", "AP001605.1", 1.25424869262167, 3.33373531235266, 1.55562087743907, 2.14302556664115, 0.0321110454863631, NA  
"22558", "AP001604.1", 0.205372544040962, 0.695830627438559, 3.33747149429751, 0.208490358233014, 0.834846110249776, NA  
"22559", "LINC01695", 0.696691973966542, 1.46287413787155, 2.01313327755612, 0.726665320265051, 0.467431002873786, NA  
"22560", "AF129075.1", 0.142120095111522, -0.0533240139618842, 3.35247519753738, -0.0159058638229611, 0.987309491940711, NA  
"22561", "AF129075.3", 0.23843966004588, 0.69583062743856, 3.33747149429751, 0.208490358233014, 0.834846110249776, NA  
"22562", "AF124730.1", 2.25774224591209, -0.263761885144477, 1.03928851135759, -0.253790821568819, 0.799657164674346, NA  
"22563", "LINC00189", 0.201646305276721, -1.9490730241217, 3.3359781915796, -0.584258323103367, 0.559046527482917, NA  
"22564", "BACH1-



IT1",0.561315238708303,1.08888001239347,1.86965970465012,0.58239475862  
1189,0.56030081120129,NA  
"22565","AP000240.1",2.31444094693813,-0.321669726311145,1.11355740598  
702,-0.288866765720108,0.772683337137835,NA  
"22566","BACH1-  
AS1",0.165319271277154,-0.774663427007578,3.35247519753738,-0.23107208  
2972193,0.817258802814835,NA  
"22567","BACH1-  
IT2",0.809893729179496,-1.23698503920278,1.59873053460693,-0.773729538  
797429,0.439090748086642,NA  
"22568","GRIK1",0.482790692380287,0.732321815004169,2.44449961489893,0  
.299579435619771,0.764497972111282,NA  
"22569","AP000238.1",0.628160605746553,-1.190709886416,1.7916767553129  
1,-0.664578520028881,0.506320111716479,NA  
"22570","GRIK1-  
AS1",0.31653527514154,1.37400143518144,3.05395269884267,0.449909206420  
301,0.652775908980166,NA  
"22571","AP000253.1",1.67983748559479,1.41613670178868,1.1962428325843  
8,1.18382042777154,0.236484154082557,NA  
"22572","AP000255.1",0.305740361881726,-1.38485840137887,2.64966120810  
703,-0.52265489532839,0.601214431685811,NA  
"22573","LINC00159",0.351019725660226,0.108771112860584,2.571025162754  
53,0.0423065143182222,0.966254352262437,NA  
"22574","AP000265.1",0.388633157905099,0.432636944008462,2.25154176219  
256,0.192151418762563,0.84762359891593,NA  
"22575","MIS18A-  
AS1",0.183715948661733,0.576034712544328,3.34068880739852,0.1724299226  
16139,0.863099549623161,NA  
"22576","MRAP",0.100823152638361,-1.35173207482145,3.35247519753738,-0  
.40320419844251,0.686798011343181,NA  
"22577","C21orf62",1.16148925986338,1.17939514927854,1.49041218326501,  
0.791321462962595,0.428756426885872,NA  
"22578","OLIG1",0,NA,NA,NA,NA,NA  
"22579","AP000317.1",0.687023162156585,0.252423541060024,1.66163595517  
566,0.151912661900325,0.879255821452407,NA  
"22580","AP000320.1",1.72934977376442,1.69129329655399,1.4622415986613  
,1.1566442222013,0.247417746937298,NA  
"22581","KCNE2",0.314672155759419,0.253123291804313,3.11930621204769,0  
.0811473047521514,0.935324805950557,NA  
"22582","AP000322.1",0.267550208500038,-1.3833228396413,2.756733730752  
19,-0.501797770386714,0.615809781659427,NA  
"22583","KCNE1",1.00712590018591,1.28036820446233,1.57611047086637,0.8  
12359430464623,0.416585418117664,NA  
"22584","AP000331.1",2.04160431195775,0.219448284868447,1.152339030577  
16,0.190437257651972,0.848966504456057,NA  
"22585","AP000695.1",0.154285403418625,-0.774663427007578,3.3524751975  
3738,-0.231072082972193,0.817258802814835,NA  
"22586","AP000695.2",2.21897300069327,-1.10875315059504,1.256083254950  
96,-0.882706736376585,0.377394741551903,NA  
"22587","CLDN14",0,NA,NA,NA,NA,NA

"22588", "SIM2", 0.102686272020481, -0.0533240139618846, 3.35247519753738, -0.0159058638229612, 0.987309491940711, NA  
"22589", "AP000704.1", 1.16758749225025, 0.348113413058521, 1.45318103661749, 0.239552680833774, 0.810677051890078, NA  
"22590", "AP001429.1", 0.0644961186387932, -0.0533240139618838, 3.35247519753738, -0.015905863822961, 0.987309491940711, NA  
"22591", "DSCR9", 0.900494970703715, 1.85575791067107, 1.61516767011304, 1.14895682040317, 0.250573786047375, NA  
"22592", "AP001432.1", 1.54839866904346, -0.810848003875209, 1.23099859102877, -0.65869125260133, 0.510094051268277, NA  
"22593", "AP001412.1", 0.424960191904666, -0.699145451204289, 2.21059536464168, -0.316270205930525, 0.751797423586746, NA  
"22594", "AP001437.2", 0.100823152638361, -1.35173207482145, 3.35247519753738, -0.40320419844251, 0.686798011343181, NA  
"22595", "KCNJ6", 0.204917209243366, -0.774663427007578, 3.35247519753738, -0.231072082972194, 0.817258802814834, NA  
"22596", "AP001434.1", 0.106924501560529, 0.385965786494404, 3.34626872025989, 0.115342137395477, 0.908173940404949, NA  
"22597", "ERG", 0.388177823107502, -0.770699685600376, 2.51958549508263, -0.30588352215256, 0.759693332445144, NA  
"22598", "AP001042.1", 1.20443035625073, -0.843078681210164, 1.60217763037785, -0.5262079966822, 0.598743698511944, NA  
"22599", "AF064858.1", 0.400044220337556, -0.843352586623452, 2.49000702122335, -0.338694862879989, 0.73483961100659, NA  
"22600", "AF129408.1", 0.618706036548305, -0.361557455039009, 1.87108128030383, -0.193234499668714, 0.846775321043537, NA  
"22601", "BRWD1-IT1", 0.203509424658842, -0.774663427007579, 3.35247519753738, -0.231072082972194, 0.817258802814834, NA  
"22602", "B3GALT5-AS1", 0, NA, NA, NA, NA, NA  
"22603", "PLAC4", 0.646866293948087, 0.369772588378331, 2.0357953649642, 0.181635440743247, 0.85586883377121, NA  
"22604", "AP001610.2", 0, NA, NA, NA, NA, NA  
"22605", "ZNF295-AS1", 0.833143469467975, 0.381626846814329, 1.70707323870424, 0.223556223694307, 0.823102629938031, NA  
"22606", "UMODL1", 0, NA, NA, NA, NA, NA  
"22607", "UMODL1-AS1", 0, NA, NA, NA, NA, NA  
"22608", "TFF3", 0.709390358761352, 2.41239696624638, 1.90982953595096, 1.2631477945204, 0.20653607032632, NA  
"22609", "TMPRSS3", 0.11921983002294, -0.0533240139618846, 3.35247519753738, -0.0159058638229612, 0.987309491940711, NA  
"22610", "UBASH3A", 0.665098856457496, 1.33035088235154, 2.03623906347887, 0.653337275672664, 0.513538866418168, NA  
"22611", "RSPH1", 0.972074233524171, -2.38230134990329, 1.82707344716039, -1.30388920796032, 0.192271360406329, NA  
"22612", "AP001626.1", 0, NA, NA, NA, NA, NA  
"22613", "ERVH48-1", 0, NA, NA, NA, NA, NA  
"22614", "CBS", 0.843145281392091, -0.0932435910910014, 1.69786466520631, -0.0549181527843807, 0.95620366987214, NA

"22615", "LINC01679", 1.51629006991692, 0.0557915864959028, 1.394169170203  
42, 0.0400178024936259, 0.968078933323508, NA  
"22616", "AP001046.1", 0, NA, NA, NA, NA, NA  
"22617", "SIK1", 0.87619042545302, -3.02311643004638, 2.01004607606426, -1.  
50400354800112, 0.132580453188215, NA  
"22618", "LINC00313", 0.165319271277154, -0.774663427007578, 3.35247519753  
738, -0.231072082972193, 0.817258802814835, NA  
"22619", "HSF2BP", 1.55655695076963, 1.45394611208079, 1.3078412029887, 1.1  
1171456347928, 0.266260896071299, NA  
"22620", "AP001053.1", 0.102230937222884, -1.35173207482145, 3.35247519753  
738, -0.403204198442509, 0.686798011343181, NA  
"22621", "AATBC", 0.352281186264108, -0.153285691053076, 2.56347680645525,  
-0.0597960124574085, 0.952318101493915, NA  
"22622", "GATD3A", 18.5678848050712, 3.35915395428445, 1.26672029547729, 2.  
65185137261793, NA, NA  
"22623", "LINC01678", 0.11921983002294, -0.0533240139618846, 3.35247519753  
738, -0.0159058638229612, 0.987309491940711, NA  
"22624", "AP001056.2", 1.52318909171232, -1.1834913507335, 1.2153149309613  
3, -0.973814540233899, 0.330148632223059, NA  
"22625", "AP001057.1", 0.45736750608394, 0.819066849916936, 2.090702660438  
24, 0.391766302026539, 0.695230895847214, NA  
"22626", "AP001059.3", 0.0534622507802646, -0.0533240139618838, 3.35247519  
753738, -0.015905863822961, 0.987309491940711, NA  
"22627", "AP001059.2", 0.102686272020481, -0.0533240139618846, 3.352475197  
53738, -0.0159058638229612, 0.987309491940711, NA  
"22628", "AIRE", 0.633149229231724, 1.10516279188363, 2.23751024779697, 0.4  
9392524256448, 0.621358976665845, NA  
"22629", "AP001062.3", 0.710769581048085, 0.0836700279075552, 1.8147232991  
8451, 0.0461062179259804, 0.963225590092475, NA  
"22630", "TRPM2", 1.21074407532334, -1.75488457459415, 1.55999995491371, -1.  
.12492604186724, 0.260620375579609, NA  
"22631", "AP001065.3", 0.544903067045063, -0.204231608181226, 1.8691434510  
5302, -0.109264812214476, 0.912992455237083, NA  
"22632", "LINC02575", 0.307439366388676, -0.151735553622885, 2.66985891163  
42, -0.0568327985279224, 0.954678386705447, NA  
"22633", "TSPEAR-  
AS1", 0.916838552072532, 0.199209048483693, 1.4280292753355, 0.13949927492  
6903, 0.889055628862533, NA  
"22634", "TSPEAR-  
AS2", 1.20503201502897, -0.326865702999139, 1.31164964644581, -0.249201990  
702967, 0.803204539636272, NA  
"22635", "LINC01424", 0, NA, NA, NA, NA, NA  
"22636", "AL844908.2", 1.93743446728498, -0.579970254686764, 1.09127991860  
174, -0.53145874381147, 0.59510092323474, NA  
"22637", "AL844908.1", 0.102230937222884, -1.35173207482145, 3.35247519753  
738, -0.403204198442509, 0.686798011343181, NA  
"22638", "LINC00334", 0, NA, NA, NA, NA, NA  
"22639", "COL18A1-AS2", 0, NA, NA, NA, NA, NA  
"22640", "COL18A1-  
AS1", 0.102686272020481, -0.0533240139618846, 3.35247519753738, -0.0159058

638229612,0.987309491940711,NA  
"22641","LINC01694",0.0644961186387932,-0.0533240139618838,3.352475197  
53738,-0.015905863822961,0.987309491940711,NA  
"22642","AL133492.1",1.11445367264757,2.09440236984585,1.5932423313807  
6,1.31455355446824,0.18865998826709,NA  
"22643","AJ011931.2",0.11921983002294,-0.0533240139618846,3.3524751975  
3738,-0.0159058638229612,0.987309491940711,NA  
"22644","AJ239328.1",0,NA,NA,NA,NA,NA  
"22645","AP001476.1",0.479692730528256,0.232695841806206,2.11717768446  
793,0.109908508630765,0.912481934517355,NA  
"22646","FTCD",0.97214360090241,0.18001176606334,1.41966829455419,0.12  
6798468877456,0.899099907615855,NA  
"22647","AP001468.1",0.60332277440311,0.328208264023006,2.254903052959  
49,0.145553159632404,0.884274147265214,NA  
"22648","AP000471.1",0,NA,NA,NA,NA,NA  
"22649","DIP2A-  
IT1",0.439933378226193,0.432850802032095,2.47632299782881,0.1747957768  
07633,0.861240106870595,NA  
"22650","S100B",2.23290310722343,-1.60795851463803,1.03334571665224,-1  
.55607023741035,0.119691391392878,NA  
"22651","AC007064.2",0.167182390659274,0.576034712544328,3.34068880739  
852,0.172429922616139,0.863099549623161,NA  
"22652","AC006946.3",0.463132554391825,-0.391143749145982,1.9540958882  
2753,-0.200166098041776,0.841350680428588,NA  
"22653","TMEM121B",0.304332577297202,-1.37410761592356,3.0944367132202  
1,-0.444057430566612,0.657001062693595,NA  
"22654","CECR2",1.28728428458946,3.29281272304057,2.23254511842123,1.4  
7491430111348,0.140235584974165,NA  
"22655","AC007666.1",0,NA,NA,NA,NA,NA  
"22656","LINC00528",0.56727026364983,2.11947732309895,2.24633984913444  
,0.9435247849588,0.345412544026239,NA  
"22657","AC016026.2",0.55362858046378,-0.802463038629043,2.34835225491  
074,-0.341713231884602,0.732566713310455,NA  
"22658","AC016027.2",0.0534622507802646,-0.0533240139618838,3.35247519  
753738,-0.015905863822961,0.987309491940711,NA  
"22659","AC016027.1",0.464719329637996,-0.159182224622241,2.4083105165  
0938,-0.0660970516596677,0.947300558155012,NA  
"22660","FAM230A",0,NA,NA,NA,NA,NA  
"22661","PRODH",0,NA,NA,NA,NA,NA  
"22662","AC007326.5",0,NA,NA,NA,NA,NA  
"22663","DGCR9",0.0534622507802646,-0.0533240139618838,3.3524751975373  
8,-0.015905863822961,0.987309491940711,NA  
"22664","AC004461.2",0.204917209243366,-0.774663427007578,3.3524751975  
3738,-0.231072082972194,0.817258802814834,NA  
"22665","LINC01311",1.47258390402155,-1.2124382536842,1.23812690596192  
, -0.979252003850307,0.327455479078998,NA  
"22666","AC000068.1",0.338147676061,0.362393738434311,2.57090127804968  
,0.140959803290941,0.887901697530707,NA  
"22667","AC000068.3",0.220189306641942,-0.267602342861375,2.9350649655  
7825,-0.0911742486111047,0.927354136344172,NA

"22668", "CDC45", 0.11921983002294, -0.0533240139618846, 3.35247519753738, -0.0159058638229612, 0.987309491940711, NA  
"22669", "AC006547.1", 0.810478869563668, 0.799105551251477, 1.94925965366114, 0.409953363447799, 0.681840158736001, NA  
"22670", "AC006547.3", 1.22790971317645, 0.662834293209526, 1.55688309685349, 0.425744421369297, 0.670294089552844, NA  
"22671", "AC006547.2", 0.274913018026089, -0.226100793799534, 2.74072232109206, -0.0824967900102491, 0.934251670836265, NA  
"22672", "LINC00896", 0.220042982661301, -0.774663427007579, 3.35247519753738, -0.231072082972194, 0.817258802814834, NA  
"22673", "RTN4R", 0, NA, NA, NA, NA, NA  
"22674", "AC007663.4", 0.898442639067346, 1.56512052767102, 1.74075673799441, 0.899103529809833, 0.368597518128082, NA  
"22675", "AC007663.3", 0.855282577212064, -0.348442038564271, 1.73612200222135, -0.200701355157324, 0.840932100015359, NA  
"22676", "AC007731.2", 0, NA, NA, NA, NA, NA  
"22677", "AIFM3", 0.693541733649314, 1.2292057216321, 1.95396871435494, 0.62908157771497, 0.529295650452892, NA  
"22678", "AC002470.1", 1.84874882503533, -0.872186071320008, 1.07198502303117, -0.813617776910537, 0.415863950724785, NA  
"22679", "P2RX6", 1.59544576143802, 2.73204604778876, 1.49806417280108, 1.82371763332433, 0.0681947716300469, NA  
"22680", "LRRC74B", 0, NA, NA, NA, NA, NA  
"22681", "AP000550.1", 1.11113471428775, -0.679638005729815, 1.48655649901522, -0.457189488714384, 0.647534852868845, NA  
"22682", "RIMBP3C", 0.942757772826464, 2.02146437227548, 1.77401006740202, 1.13948867000279, 0.254499391260533, NA  
"22683", "CCDC116", 0.302935778684673, 1.24376146070571, 3.12847474347089, 0.397561611549346, 0.690953362451962, NA  
"22684", "AP000553.8", 0, NA, NA, NA, NA, NA  
"22685", "AC245060.2", 0.23843966004588, 0.69583062743856, 3.33747149429751, 0.208490358233014, 0.834846110249776, NA  
"22686", "ZNF280B", 0.231678509298067, 0.99788326475647, 3.33029638254771, 0.299637975162162, 0.764453314336329, NA  
"22687", "ZNF280A", 0.722963451652979, 1.53699408246671, 1.93407735911209, 0.794691109549168, 0.4267932051724, NA  
"22688", "AC244250.4", 0, NA, NA, NA, NA, NA  
"22689", "IGLV3-1", 0.11921983002294, -0.0533240139618846, 3.35247519753738, -0.0159058638229612, 0.987309491940711, NA  
"22690", "RSPH14", 0, NA, NA, NA, NA, NA  
"22691", "GNAZ", 0.868882288237663, -0.828471821242584, 1.71473053621991, -0.483149861592209, 0.62898933254779, NA  
"22692", "LINC02556", 0, NA, NA, NA, NA, NA  
"22693", "AP000345.2", 0.534991482556669, 1.00509526635607, 1.87368867621392, 0.536425970394946, 0.591664186680909, NA  
"22694", "DRICH1", 0.23843966004588, 0.69583062743856, 3.33747149429751, 0.208490358233014, 0.834846110249776, NA  
"22695", "RGL4", 1.34306020458108, -0.10326076625183, 1.18487998808964, -0.0871487131944188, 0.930553305116715, NA  
"22696", "VPREB3", 0, NA, NA, NA, NA, NA

"22697", "C22orf15", 0.594102150643857, -1.5693300854486, 2.00698755597555, -0.781933141925132, 0.434253866531249, NA  
"22698", "DERL3", 1.79627637989352, -0.244721847892219, 1.14796642354248, -0.213178576370761, 0.831187677781789, NA  
"22699", "AP000350.7", 0.491155315050409, 0.825121690283651, 2.1279210973706, 0.387759532674039, 0.698193995152171, NA  
"22700", "MIF-AS1", 1.08831805567718, 2.25326411241364, 1.85784302330075, 1.21283880508395, 0.225191455901875, NA  
"22701", "AP000350.6", 1.17778366183988, 0.96402091398971, 2.03451925140474, 0.473832289040322, 0.635619507173548, NA  
"22702", "AC253536.6", 0.466257134377828, 0.639582163945474, 2.19654113733711, 0.291176956840812, 0.770915985173488, NA  
"22703", "AC253536.3", 0.739241743227497, 0.452148442558039, 1.92831009523574, 0.234479113953279, 0.814613045927172, NA  
"22704", "ADORA2A-AS1", 0.102230937222884, -1.35173207482145, 3.35247519753738, -0.403204198442509, 0.686798011343181, NA  
"22705", "UPB1", 0.541908507214368, -0.452621450680647, 2.07434718799084, -0.218199466946054, 0.827273700391991, NA  
"22706", "AP000355.1", 0.142120095111522, -0.0533240139618842, 3.35247519753738, -0.0159058638229611, 0.987309491940711, NA  
"22707", "GGT1.1", 0.117958369419058, 0.451348601316665, 3.34428110054629, 0.134961322851401, 0.892642454377335, NA  
"22708", "AP000356.1", 0, NA, NA, NA, NA, NA  
"22709", "AP000356.2", 0.23843966004588, 0.69583062743856, 3.33747149429751, 0.208490358233014, 0.834846110249776, NA  
"22710", "SGSM1", 0.532136099959722, -0.821838983021312, 2.11592307303614, -0.388406834584044, 0.697714987213791, NA  
"22711", "AL022323.3", 2.17456831252955, -0.0416490999918642, 1.1120881262442, -0.0374512585909208, 0.970125202866525, NA  
"22712", "AL022323.2", 0.415394457959801, 1.70916804331239, 2.43369107273673, 0.702294577343542, 0.482495474314805, NA  
"22713", "AL022323.1", 0, NA, NA, NA, NA, NA  
"22714", "CRYBB3", 0.106924501560529, 0.385965786494404, 3.34626872025989, 0.115342137395477, 0.908173940404949, NA  
"22715", "Z99916.1", 0.11921983002294, -0.0533240139618846, 3.35247519753738, -0.0159058638229612, 0.987309491940711, NA  
"22716", "AL022324.3", 0, NA, NA, NA, NA, NA  
"22717", "AL008721.1", 0, NA, NA, NA, NA, NA  
"22718", "MY018B", 0, NA, NA, NA, NA, NA  
"22719", "SEZ6L", 0.478449060818903, 0.363471148930414, 2.39234992285089, 0.151930595712051, 0.879241676520214, NA  
"22720", "CRYBB1", 0.310685332713897, -0.774666839538346, 3.04539624828073, -0.254373085267864, 0.799207342088715, NA  
"22721", "CRYBA4", 0, NA, NA, NA, NA, NA  
"22722", "Z99774.1", 0.642857662500863, -1.87772046287979, 1.77250393413245, -1.05936039222325, 0.289435680662896, NA  
"22723", "Z97353.2", 0.516057876754859, 0.603133310384445, 2.38353722716825, 0.253041279787769, 0.800236314285111, NA

"22724", "AL008638.3", 0.172682080803205, 0.494635591052761, 3.34300496985  
029, 0.147961368742719, 0.882373255878367, NA  
"22725", "LINC02554", 0, NA, NA, NA, NA, NA  
"22726", "Z93930.3", 0.306692811668653, -2.34839005368482, 3.3201011424245  
3, -0.707324853353681, 0.479364624090735, NA  
"22727", "ZNR3-  
IT1", 0.220644641439539, 0.945449760607245, 2.90117912387055, 0.3258846559  
41509, 0.744511625317288, NA  
"22728", "AL031186.1", 0.100823152638361, -1.35173207482145, 3.35247519753  
738, -0.40320419844251, 0.686798011343181, NA  
"22729", "RASL10A", 1.07782113225346, -2.1366106813123, 1.5186124053052, -1  
.40694931362878, 0.159442419206104, NA  
"22730", "AC002059.1", 0.269868662679755, 1.13857476503723, 3.232474371463  
12, 0.352230098121977, 0.724665706448339, NA  
"22731", "RFPL1S", 0.870092718855335, 1.93915215586219, 1.67341919345126, 1  
.15879641123447, 0.246539180697964, NA  
"22732", "NEFH", 1.48729080806208, -0.542248879099721, 1.10980126578501, -0  
.488599982552879, 0.625124925381978, NA  
"22733", "CABP7", 0.171420620199322, 0.765902268429694, 3.33569101336987, 0  
.22960827767316, 0.818396174063793, NA  
"22734", "HORMAD2", 0.203509424658842, -0.774663427007579, 3.3524751975373  
8, -0.231072082972194, 0.817258802814834, NA  
"22735", "AC004264.1", 0.155693188003149, -0.774663427007578, 3.3524751975  
3738, -0.231072082972193, 0.817258802814835, NA  
"22736", "AC004832.5", 0.372554934700236, 1.53298501045004, 2.944030959051  
6, 0.520709541364294, 0.602569126651357, NA  
"22737", "AC004832.4", 0.267550208500038, -1.3833228396413, 2.756733730752  
19, -0.501797770386714, 0.615809781659427, NA  
"22738", "SEC14L6", 0.11921983002294, -0.0533240139618846, 3.3524751975373  
8, -0.0159058638229612, 0.987309491940711, NA  
"22739", "GAL3ST1", 0.549138944429206, -0.00565411724517455, 2.36595470359  
823, -0.00238978254172642, 0.998093231221226, NA  
"22740", "OSBP2", 1.23487592290922, -0.983332235328892, 1.41740247555822, -  
0.693756538658242, 0.48783490251891, NA  
"22741", "AC004542.2", 0.350443004523411, 0.278677423508893, 2.58156446456  
357, 0.107949046918727, 0.914036110590592, NA  
"22742", "AC005005.4", 0.221906102043421, 0.695830468846429, 3.33747149841  
039, 0.208490310457437, 0.834846147549618, NA  
"22743", "INPP5J", 0.567080287016188, -0.0294766078413879, 1.9354191124961  
7, -0.0152300902946912, 0.98784861585975, NA  
"22744", "PIK3IP1-  
AS1", 0.209155438783414, -0.335374473295219, 3.34626863491525, -0.10022341  
595528, 0.920166956363588, NA  
"22745", "AL096701.3", 1.38327321118819, 0.716089337902621, 1.339244672948  
32, 0.5346964243107, 0.592859794457137, NA  
"22746", "AL096701.4", 0.644343372740323, 0.50715852182418, 1.758145257000  
38, 0.288462241561006, 0.772992929510039, NA  
"22747", "SLC5A1", 0.893184041109304, 0.0527559408236812, 1.63414690517718  
, 0.0322834750392048, 0.974245987344535, NA  
"22748", "RFPL2", 0, NA, NA, NA, NA, NA

"22749", "SLC5A4", 0, NA, NA, NA, NA, NA  
"22750", "RFPL3S", 0.359657947459587, 0.367118670205437, 2.58028016787908, 0.14227860787195, 0.886859943060388, NA  
"22751", "SYN3", 2.00471667668187, -0.248218571276489, 1.03730693827471, -0.23929134388066, 0.810879677051652, NA  
"22752", "Z82246.1", 0.438731874100646, 1.85310409441072, 2.78819279056306, 0.664625523989141, 0.50629003977433, NA  
"22753", "LINC01640", 0.11921983002294, -0.0533240139618846, 3.35247519753738, -0.0159058638229612, 0.987309491940711, NA  
"22754", "LARGE-AS1", 0.824866915501023, -0.459919041748752, 1.62251137569707, -0.283461212437515, 0.776823310800091, NA  
"22755", "Z73429.1", 1.53805601573554, -0.580448769183352, 1.2795919854343, -0.453620197524403, 0.650102213734872, NA  
"22756", "AL008635.1", 0, NA, NA, NA, NA, NA  
"22757", "Z82244.2", 0.505978882573924, -2.11445420443983, 2.65549779540804, -0.796255304032335, 0.425883658728666, NA  
"22758", "RASD2", 0.205372544040962, 0.695830627438559, 3.33747149429751, 0.208490358233014, 0.834846110249776, NA  
"22759", "MB", 0.438395788055094, -0.988298671919134, 2.17111756618239, -0.455202743192264, 0.648963387167953, NA  
"22760", "AL049747.1", 0.100823152638361, -1.35173207482145, 3.35247519753738, -0.40320419844251, 0.686798011343181, NA  
"22761", "AL049748.1", 0.205372544040962, 0.695830627438559, 3.33747149429751, 0.208490358233014, 0.834846110249776, NA  
"22762", "Z95114.4", 1.35209138297294, -0.144953270886602, 1.44245150428497, -0.100490914568706, 0.919954595450599, NA  
"22763", "Z95114.2", 0.102686272020481, -0.0533240139618846, 3.35247519753738, -0.0159058638229612, 0.987309491940711, NA  
"22764", "PVALB", 0, NA, NA, NA, NA, NA  
"22765", "Z73420.1", 0, NA, NA, NA, NA, NA  
"22766", "SSTR3", 0, NA, NA, NA, NA, NA  
"22767", "AL031587.3", 1.34230763919898, -0.834883864405243, 1.37035841156256, -0.609244893424092, 0.542362127503161, NA  
"22768", "AL021707.5", 0.219614265997676, -1.35173207482145, 3.35247519753738, -0.40320419844251, 0.686798011343181, NA  
"22769", "AL021707.3", 0, NA, NA, NA, NA, NA  
"22770", "AL021707.8", 0.166727055861678, -0.774663427007578, 3.35247519753738, -0.231072082972193, 0.817258802814835, NA  
"22771", "AL021707.7", 1.03112351100321, 1.2532322226066, 1.55591051089629, 0.805465490354369, 0.420551112863549, NA  
"22772", "NPTXR", 2.02595964575269, -0.692785166854909, 1.02011143321243, -0.679126950546235, 0.497057427491789, NA  
"22773", "APOBEC3A", 1.69502330982584, -1.26346447421443, 1.28082198347775, -0.98644814854271, 0.323913247701971, NA  
"22774", "APOBEC3B", 0.117958369419058, 0.451348601316665, 3.34428110054629, 0.134961322851401, 0.892642454377335, NA  
"22775", "APOBEC3H", 1.64951116768834, 0.572662502644385, 1.28398256430692, 0.446004890224894, 0.655593713489761, NA  
"22776", "AL031590.1", 0.0534622507802646, -0.0533240139618838, 3.35247519



753738,-0.015905863822961,0.987309491940711,NA  
"22777","AL022326.1",0.301674318080791,1.29247111944335,2.633057619220  
93,0.49086321165496,0.623523198151138,NA  
"22778","MGAT3",0.182454488057851,0.814003878402388,3.33451052748657,0  
.244114952312343,0.80714179253596,NA  
"22779","CACNA1I",0.220042982661301,-0.774663427007579,3.3524751975373  
8,-0.231072082972194,0.817258802814834,NA  
"22780","GRAP2",2.12944790551054,0.00568333037390703,1.23712602395456,  
0.00459397851460587,0.996334548363546,NA  
"22781","Z82206.1",0.160386752340794,0.715986771710925,3.3369518342016  
1,0.214563112470645,0.830107956063492,NA  
"22782","FAM83F",0,NA,NA,NA,NA,NA  
"22783","Z83847.1",0,NA,NA,NA,NA,NA  
"22784","MCHR1",0.273505233441565,-0.226106766776126,2.74490218220006,  
-0.082373342205914,0.934349833830783,NA  
"22785","DNAJB7",0.388179503600051,-2.37645961319578,2.86395305033592,  
-0.829783020680815,0.406661472415033,NA  
"22786","EP300-  
AS1",0.102686272020481,-0.0533240139618846,3.35247519753738,-0.0159058  
638229612,0.987309491940711,NA  
"22787","AL008582.1",0.0644961186387932,-0.0533240139618838,3.35247519  
753738,-0.015905863822961,0.987309491940711,NA  
"22788","MEI1",1.63354569700661,-0.396435347409621,1.14926467340105,-0  
.344946953112583,0.730134250992543,NA  
"22789","SHISA8",0.205372544040962,0.695830627438559,3.33747149429751,  
0.208490358233014,0.834846110249776,NA  
"22790","TNFRSF13C",0.84502235244364,0.296487616433053,1.8854725432058  
7,0.157248440186212,0.875049053383938,NA  
"22791","CENPM",0.416903092982304,-0.330706287350281,2.51059087901154,  
-0.131724483712171,0.895202219058772,NA  
"22792","SEPTIN3",0.0644961186387932,-0.0533240139618838,3.35247519753  
738,-0.015905863822961,0.987309491940711,NA  
"22793","Z99716.2",2.15908000575544,0.470147513072284,1.00270661181854  
,0.468878441142029,0.639156527085059,NA  
"22794","AL021878.2",1.46418882399236,-1.43821058094872,1.229714821591  
35,-1.1695480575631,0.242182890806968,NA  
"22795","CYP2D6",0.815267416675292,-0.261006484573633,1.75257879803693  
, -0.148927103800404,0.881611153963798,NA  
"22796","AC254562.2",0.0534622507802646,-0.0533240139618838,3.35247519  
753738,-0.015905863822961,0.987309491940711,NA  
"22797","AC254562.3",0.205372544040962,0.695830627438559,3.33747149429  
751,0.208490358233014,0.834846110249776,NA  
"22798","OGFRP1",2.16323143329857,-1.93319869884313,1.04715122320928,-  
1.84615044703698,0.064870363690074,NA  
"22799","NFAM1",1.5839839092283,-1.13109607778932,1.26461083952479,-0.  
894422254212499,0.371096009910112,NA  
"22800","AL022476.1",0.877634133650961,-0.322312576205704,1.6612280578  
0643,-0.19402066723536,0.846159699276219,NA  
"22801","BIK",0.550681525215608,-0.740111098163944,2.30996054919588,-0  
.32039988665417,0.748665211449589,NA

"22802", "SCUBE1", 2.04748833596377, 1.57610055388994, 1.65520230128259, 0.952210223891449, 0.340990376958418, NA  
"22803", "Z97055.2", 0.0534622507802646, -0.0533240139618838, 3.35247519753738, -0.015905863822961, 0.987309491940711, NA  
"22804", "PNPLA3", 0.441949084704722, 0.631648184503036, 2.48013843998428, 0.254682631549809, 0.798968232005048, NA  
"22805", "AL031595.2", 0, NA, NA, NA, NA, NA  
"22806", "SHISAL1", 0.220042982661301, -0.774663427007579, 3.35247519753738, -0.231072082972194, 0.817258802814834, NA  
"22807", "Z85994.1", 0.102686272020481, -0.0533240139618846, 3.35247519753738, -0.0159058638229612, 0.987309491940711, NA  
"22808", "Z82243.1", 0.0644961186387932, -0.0533240139618838, 3.35247519753738, -0.015905863822961, 0.987309491940711, NA  
"22809", "AL008718.3", 0.100823152638361, -1.35173207482145, 3.35247519753738, -0.40320419844251, 0.686798011343181, NA  
"22810", "UPK3A", 0.168565237602375, -1.35173207482145, 3.35247519753738, -0.40320419844251, 0.686798011343181, NA  
"22811", "SMC1B", 0.11921983002294, -0.0533240139618846, 3.35247519753738, -0.0159058638229612, 0.987309491940711, NA  
"22812", "RIBC2", 0.849906432139904, -0.111463174767493, 2.18137854736242, -0.0510975845537066, 0.959247760727272, NA  
"22813", "AL021391.1", 0.244806367132003, 0.695807100884759, 3.33664907448574, 0.208534696143316, 0.834811494458112, NA  
"22814", "BX324167.2", 0, NA, NA, NA, NA, NA  
"22815", "WNT7B", 0, NA, NA, NA, NA, NA  
"22816", "AL121672.3", 1.37067417705774, 0.344161169987564, 1.34190615156794, 0.256471862496071, 0.797586504479139, NA  
"22817", "AL121672.1", 0.102686272020481, -0.0533240139618846, 3.35247519753738, -0.0159058638229612, 0.987309491940711, NA  
"22818", "FP325332.1", 0.602465857200823, 2.16140165930903, 2.28785713317083, 0.944727547875099, 0.344797989196728, NA  
"22819", "PKDREJ", 0.841187179235992, 0.905113648299641, 1.50221113493362, 0.602520928817131, 0.546827436231061, NA  
"22820", "GTSE1-DT", 1.07544669375889, -0.746731475226551, 1.73221809414988, -0.431083982870542, 0.666407306460803, NA  
"22821", "GTSE1", 1.2506022244235, 2.36855072100058, 1.5791401106794, 1.4998990304803, 0.133640559177244, NA  
"22822", "CELSR1", 0.544756743064421, -0.359949752762879, 1.90858751121099, -0.188594838145248, 0.850410378777875, NA  
"22823", "AL021392.1", 0.797462848139706, 0.839789008803518, 1.74516072281756, 0.481210124559577, 0.630367165813368, NA  
"22824", "TBC1D22A-AS1", 0, NA, NA, NA, NA, NA  
"22825", "LINC01644", 0.244806367132003, 0.695807100884759, 3.33664907448574, 0.208534696143316, 0.834811494458112, NA  
"22826", "AL078622.1", 1.67019646445439, 0.120357906171317, 1.35610823141439, 0.0887524339010809, 0.929278660687611, NA  
"22827", "C22orf34", 0.203054089861245, -1.95461545718866, 3.33573296423696, -0.585962808817275, 0.557900507779092, NA  
"22828", "Z97192.1", 0.166727055861678, -0.774663427007578, 3.352475197537

38,-0.231072082972193,0.817258802814835,NA  
"22829","Z97192.2",0,NA,NA,NA,NA,NA  
"22830","Z97192.3",0.286402220682214,1.17253773374183,2.71767620516714  
,0.431448651429658,0.666142181249859,NA  
"22831","Z98885.2",1.08787593219109,-1.46959132234464,1.4588724144613,  
-1.00734739225794,0.313767862679048,NA  
"22832","AL117328.2",0.11921983002294,-0.0533240139618846,3.3524751975  
3738,-0.0159058638229612,0.987309491940711,NA  
"22833","AL671710.1",1.01176740062709,1.92578247432407,1.6471110767255  
2,1.16918798102709,0.242327902513801,NA  
"22834","BX539320.1",0.403330214659409,-0.154738233194793,2.4753650874  
8665,-0.0625112772160434,0.950155681585006,NA  
"22835","MLC1",0.100823152638361,-1.35173207482145,3.35247519753738,-0  
.40320419844251,0.686798011343181,NA  
"22836","MOV10L1",1.27499427089859,-0.313918942153125,1.36772956668735  
, -0.229518283291513,0.818466111861261,NA  
"22837","PANX2",0.389209879041914,0.231017256566099,2.21805708101799,0  
.104152980797082,0.917047946845685,NA  
"22838","AL022328.3",2.18541697980101,-1.02275627002095,1.006215628579  
88,-1.01643846604173,0.309420635946879,NA  
"22839","AL022328.1",1.15458178513493,1.18768854094988,1.5314886893896  
5,0.775512446927188,0.438036913430599,NA  
"22840","AL022328.2",1.17345010114244,2.20320785850045,1.5193668000072  
1,1.45008292828959,0.147035395132856,NA  
"22841","MAPK12",0.993490429089184,0.693653219651631,1.58707996799241,  
0.437062551125935,0.662065985132827,NA  
"22842","ADM2",0,NA,NA,NA,NA,NA  
"22843","MIOX",0,NA,NA,NA,NA,NA  
"22844","U62317.4",1.44284364641707,-0.896278042052793,1.7389062919070  
7,-0.515426303432278,0.606255155791453,NA  
"22845","U62317.1",0,NA,NA,NA,NA,NA  
"22846","KLHDC7B",0.261209904979155,-0.00458555259217486,3.29716284438  
065,-0.00139075708680571,0.99889033675033,NA  
"22847","SYCE3",0.579608299502814,2.22051930548103,2.56720537689504,0.  
864955848669452,0.387063022343491,NA  
"22848","ACR",0.11921983002294,-0.0533240139618846,3.35247519753738,-0  
.0159058638229612,0.987309491940711,NA  
"22849","AL732314.6",0.286402220682214,1.17253773374183,2.717676205167  
14,0.431448651429658,0.666142181249859,NA  
"22850","AL732314.4",0.231223174500471,-0.207595008908767,3.3424514271  
8562,-0.062108609034766,0.950476341218052,NA  
"22851","CRLF2",0.172682080803205,0.494635591052761,3.34300496985029,0  
.147961368742719,0.882373255878367,NA  
"22852","IL3RA",1.54720632539949,1.95332646659822,1.40666112899512,1.3  
8862617750277,0.164946452939903,NA  
"22853","LINC00106",0.611506585521924,0.34404953789128,1.9863885386021  
7,0.173203545633317,0.862491436751816,NA  
"22854","ASMTL-  
AS1",1.43286142367713,3.4545228036956,1.73742233964609,1.9883034336943  
5,0.0467781412716724,NA

"22855", "P2RY8", 1.58928776616027, 0.526999389031814, 1.31783468897639, 0.399897948839966, 0.68923168310342, NA  
"22856", "AL683807.1", 0, NA, NA, NA, NA, NA  
"22857", "DHRSX-  
IT1", 1.1096005527487, 2.07236969579561, 1.85763096066374, 1.11559816760114, 0.26459417683019, NA  
"22858", "ARSD-  
AS1", 1.00874865953048, -0.799083160900429, 1.70157253073902, -0.469614516257721, 0.638630451619154, NA  
"22859", "ARSE", 0.142120095111522, -0.0533240139618842, 3.35247519753738, -0.0159058638229611, 0.987309491940711, NA  
"22860", "PRKX-AS1", 0, NA, NA, NA, NA, NA  
"22861", "BX842570.1", 1.31935381368621, 0.42531184563512, 1.24819861217389, 0.340740521169455, 0.733298930698141, NA  
"22862", "AC110995.1", 0.71139320680662, -3.49057914097272, 2.26578224718018, -1.54056249020259, 0.123423302957378, NA  
"22863", "NLGN4X", 1.81302524810364, 3.02843362409973, 1.43708114640225, 2.10735046638212, 0.0350872118664718, NA  
"22864", "AC079142.1", 0.58192366775114, -0.489510466139277, 1.87320586184047, -0.261322301040806, 0.793843970166054, NA  
"22865", "AC006062.1", 0.285140760078332, 1.24218829249876, 2.67233955061369, 0.464831758454311, 0.642051942885121, NA  
"22866", "WWC3-AS1", 0, NA, NA, NA, NA, NA  
"22867", "AC073529.1", 0.55990745412378, 1.08891901403085, 1.87058799834173, 0.582126590674253, 0.560481415483309, NA  
"22868", "AC004554.2", 0.220042982661301, -0.774663427007579, 3.35247519753738, -0.231072082972194, 0.817258802814834, NA  
"22869", "TLR7", 0.463965298332083, -1.51403641565635, 2.36686268956217, -0.639680714193192, 0.522380196126438, NA  
"22870", "TLR8", 0.648959011423032, -0.895078506294547, 1.96892484990016, -0.454602676348939, 0.64939510899084, NA  
"22871", "BMX", 1.11754067112763, -4.04826763992572, 1.59932351985869, -2.53123748238468, 0.0113660863936289, NA  
"22872", "CLTRN", 1.86814798722733, -0.395524480342662, 1.13261380681567, -0.349213896177617, 0.72692873449661, NA  
"22873", "Z93022.1", 0.622944480657085, -1.12369121332175, 2.29601641037074, -0.489409051366626, 0.624552129233558, NA  
"22874", "PPEF1", 0.422668355858921, -2.6205236288258, 2.36866382348853, -1.10632990753679, 0.268583751419472, NA  
"22875", "PHKA2-  
AS1", 0.554554087960491, 1.15171798340309, 2.01514344307913, 0.571531514224751, 0.567639404341375, NA  
"22876", "MAP3K15", 1.04618955765282, -2.56446585658008, 1.65779221894286, -1.5469163308146, 0.121883422572813, NA  
"22877", "EIF1AX-  
AS1", 0.11921983002294, -0.0533240139618846, 3.35247519753738, -0.0159058638229612, 0.987309491940711, NA  
"22878", "KLHL34", 1.18059191416069, 0.447811913217694, 1.48723667454453, 0.301103328664778, 0.76333570284197, NA  
"22879", "PHEX", 2.21800162132603, -0.664005329859007, 0.989726061328573, -

0.670898095749515,0.502285449541882,NA  
"22880","PTCHD1",0.102686272020481,-0.0533240139618846,3.3524751975373  
8,-0.0159058638229612,0.987309491940711,NA  
"22881","CXorf58",0.100823152638361,-1.35173207482145,3.35247519753738  
, -0.40320419844251,0.686798011343181,NA  
"22882","ARX",0,NA,NA,NA,NA,NA  
"22883","AC003659.1",0.425166865214447,1.77058485213381,2.826054116958  
67,0.626521920266434,0.530972663737252,NA  
"22884","CXorf21",0.685844782241532,-0.378648105477425,2.0050777770935  
1,-0.188844597353376,0.850214617026596,NA  
"22885","GK-  
IT1",0.306195696679323,-0.0320258052725539,3.12823849898919,-0.0102376  
482109348,0.991831681239967,NA  
"22886","AC112496.1",0.899017679711612,1.83169547467204,1.572721918803  
61,1.16466582729732,0.244154286640173,NA  
"22887","GK-AS1",0,NA,NA,NA,NA,NA  
"22888","TAB3-  
AS2",0.102686272020481,-0.0533240139618846,3.35247519753738,-0.0159058  
638229612,0.987309491940711,NA  
"22889","AC079177.1",0.166727055861678,-0.774663427007578,3.3524751975  
3738,-0.231072082972193,0.817258802814835,NA  
"22890","AL591501.1",0,NA,NA,NA,NA,NA  
"22891","CFAP47",0,NA,NA,NA,NA,NA  
"22892","AL606748.1",0.479822536114831,1.82763873767511,2.775962373579  
51,0.658380227005177,0.510293837748286,NA  
"22893","AF241728.2",0.380576058982736,0.558589692575463,2.51787543809  
187,0.221849613418041,0.824430955729196,NA  
"22894","AC092268.2",0.25651634064151,-1.38285975574301,2.791872439686  
38,-0.495316238695472,0.62037691003485,NA  
"22895","LINC02601",0.0644961186387932,-0.0533240139618838,3.352475197  
53738,-0.015905863822961,0.987309491940711,NA  
"22896","NYX",0,NA,NA,NA,NA,NA  
"22897","CASK-AS1",0,NA,NA,NA,NA,NA  
"22898","Z94277.1",0.963943271389531,1.15424547730081,1.88624818908497  
,0.611926619190415,0.540586308891192,NA  
"22899","PPP1R2C",0.627047880309556,-0.0644950126939676,2.320112405320  
71,-0.0277982275971032,0.977823079590331,NA  
"22900","DIPK2B",0.727120639002793,-2.21957413923141,1.83480477953116,  
-1.2097058847855,0.226391770951739,NA  
"22901","LINC02595",1.14151496431107,-0.959633021305495,1.343086874782  
7,-0.714498100847541,0.474919230095523,NA  
"22902","LINC01545",0.429225039578686,0.175903833931608,2.427853267707  
01,0.0724524155851234,0.942241872755202,NA  
"22903","SYN1",1.35698924775614,0.778970190315742,1.35129128245905,0.5  
76463565204232,0.564301890063718,NA  
"22904","AC244636.3",1.34276604884229,-1.262972826569,1.3390601559802,  
-0.943178557683608,0.345589579102348,NA  
"22905","AF196972.1",0.633764839679391,1.37562507349929,1.957098066992  
48,0.702890211124295,0.482124171990886,NA  
"22906","AC115618.1",0.902214762406536,-1.92935328560426,1.85732713001

919,-1.03877946669757,0.29890731302939,NA  
"22907","GATA1",0,NA,NA,NA,NA,NA  
"22908","CACNA1F",0,NA,NA,NA,NA,NA  
"22909","FOXP3",0.957673013001203,-0.846156991585809,1.46292672943798,  
-0.578400117079603,0.562994014929373,NA  
"22910","AC232271.3",0.0644961186387932,-0.0533240139618838,3.35247519  
753738,-0.015905863822961,0.987309491940711,NA  
"22911","AC232271.1",0.694519843767466,-0.132092781408409,1.9210592237  
2212,-0.0687603899855174,0.945180347641477,NA  
"22912","AC232271.2",0.0644961186387932,-0.0533240139618838,3.35247519  
753738,-0.015905863822961,0.987309491940711,NA  
"22913","GAGE10",1.03847622078935,0.705608974777094,1.42283046954344,0  
.495919218684931,0.619951406106353,NA  
"22914","USP27X-  
AS1",2.13275814466508,-0.1145138762086,0.942173872168301,-0.1215421904  
50538,0.903261599237649,NA  
"22915","CCNB3",0.583427168885129,2.16558344453888,2.28084969691754,0.  
94946345980867,0.342384947885698,NA  
"22916","LINC01284",0,NA,NA,NA,NA,NA  
"22917","AC233976.1",0.11921983002294,-0.0533240139618846,3.3524751975  
3738,-0.0159058638229612,0.987309491940711,NA  
"22918","NUDT10",1.85956609812624,-1.7067204492056,1.07478756131286,-1  
.58796073813957,0.112295217523462,NA  
"22919","AL158055.1",0,NA,NA,NA,NA,NA  
"22920","AC234031.1",0.0644961186387932,-0.0533240139618838,3.35247519  
753738,-0.015905863822961,0.987309491940711,NA  
"22921","FAM156A",0.72617917518786,-0.0770494452239005,1.7259434521186  
9,-0.0446419291022066,0.964392721366003,NA  
"22922","ALAS2",0,NA,NA,NA,NA,NA  
"22923","MTRNR2L10",0.100823152638361,-1.35173207482145,3.352475197537  
38,-0.40320419844251,0.686798011343181,NA  
"22924","AL354793.1",0.102686272020481,-0.0533240139618846,3.352475197  
53738,-0.0159058638229612,0.987309491940711,NA  
"22925","AL022157.1",1.53496954797657,-0.384596169953184,1.21588726022  
107,-0.316309071190742,0.751767926547975,NA  
"22926","FAAH2",0.59214258256394,0.205921580441015,1.87883977135019,0.  
109600394659005,0.912726297652159,NA  
"22927","ASB12",0.203509424658842,-0.774663427007579,3.35247519753738,  
-0.231072082972194,0.817258802814834,NA  
"22928","MTMR8",0.959951674461335,0.454392203171792,1.42820360557814,0  
.318156459903246,0.750366258008455,NA  
"22929","AL034397.2",0,NA,NA,NA,NA,NA  
"22930","AL034397.3",1.91308206341445,-0.400602521993215,1.11591207507  
023,-0.358991116722169,0.71960173477687,NA  
"22931","FAM155B",0.279606582363734,1.19594067730093,3.16985479259559,  
0.377285634690431,0.705961346602518,NA  
"22932","OTUD6A",0.324137039266305,-0.0524131773797337,2.6534922959424  
2,-0.0197525266833754,0.984240788704199,NA  
"22933","IGBP1-  
AS2",0.142120095111522,-0.0533240139618842,3.35247519753738,-0.0159058

638229611,0.987309491940711,NA  
"22934","KIF4A",0.762910236464061,-2.62345690369109,2.0602641647693,-1  
.27335947911556,0.20289050933528,NA  
"22935","SLC7A3",0,NA,NA,NA,NA,NA  
"22936","CXorf65",0.765752175512649,-1.18487953515576,1.72344667671873  
, -0.687505770362244,0.49176406574494,NA  
"22937","AL590764.1",0,NA,NA,NA,NA,NA  
"22938","ITGB1BP2",0.677111577668191,1.37102165213466,1.78809754291292  
,0.766748803815917,0.443230880786556,NA  
"22939","CXCR3",1.37405018424659,1.2277176225323,1.40036054871646,0.87  
67153742353,0.380641254001003,NA  
"22940","ERCC6L",0,NA,NA,NA,NA,NA  
"22941","CITED1",2.27381450744596,-1.96704142760663,1.09237881861583,-  
1.80069532115159,0.0717509154823324,NA  
"22942","FAM226B",0.362163077772823,-0.055843711240554,2.5915710022774  
, -0.0215482080913392,0.982808347881005,NA  
"22943","AL353804.1",0.73113809768946,-0.084270563478988,1.61027737090  
983,-0.0523329489697627,0.95826339979706,NA  
"22944","MAGEE2",0.544326345908248,0.061903905068436,1.89043042508009,  
0.0327459314276606,0.973877195531404,NA  
"22945","AC233296.1",2.18556588362734,1.65984499563844,1.2793728079309  
8,1.29738961571551,0.194497163671154,NA  
"22946","PGAM4",0.97235740329097,-1.75070861351341,1.51952667847413,-1  
.15214075429819,0.249263238487885,NA  
"22947","P2RY10",2.24177803055418,-0.209052581028475,0.953510519889889  
, -0.219245175242132,0.826459066657098,NA  
"22948","GPR174",0.914252387572955,-0.249408854982413,1.66027261999643  
, -0.150221627447515,0.880589763272949,NA  
"22949","FAM133A",1.27529318197564,-0.722302812478385,1.25003172780646  
, -0.577827583421319,0.563380530576667,NA  
"22950","AL022151.1",0.219614265997676,-1.35173207482145,3.35247519753  
738,-0.40320419844251,0.686798011343181,NA  
"22951","DIAPH2-  
AS1",0.425536913041481,-0.954245016814906,2.17341335819663,-0.43905362  
6506962,0.660622679653843,NA  
"22952","XKRX",0.425912641691593,-1.78593473354618,2.79041850847209,-0  
.640023970642338,0.522157015602723,NA  
"22953","CENPI",1.84782259197271,0.331690622270932,1.32143254970987,0.  
251008363872797,0.801807642729339,NA  
"22954","TAF7L",0.746883320780162,0.724813546823475,1.77379235394551,0  
.408623673008425,0.682815855145539,NA  
"22955","BTK",2.31584581641461,-0.304960935792625,0.920851534217465,-0  
.331172750938379,0.740514001573836,NA  
"22956","AC234775.4",0.237178199441998,0.945890913069552,2.83590635755  
811,0.333540954393156,0.738725980375699,NA  
"22957","TCEAL2",0,NA,NA,NA,NA,NA  
"22958","AL035427.2",0.362163077772823,-0.055843711240554,2.5915710022  
774,-0.0215482080913392,0.982808347881005,NA  
"22959","BHLHB9",0.204917209243366,-0.774663427007578,3.35247519753738  
, -0.231072082972194,0.817258802814834,NA

"22960", "RAB40AL", 0.489431372902036, -1.96699669537352, 2.30888160054858, -0.851926185780237, 0.394255062029583, NA  
"22961", "BEX1", 0.320866135299661, -1.37464340165215, 3.04127275254598, -0.451996092919114, 0.651271797119151, NA  
"22962", "TCEAL5", 2.0851343085337, 0.0244524765771045, 1.15018889668531, 0.0212595310627439, 0.983038626070168, NA  
"22963", "BEX2", 1.39462120304387, -2.07938309918651, 1.35331231655925, -1.53651383626898, 0.124412406958527, NA  
"22964", "RAB40A", 0.648387773717206, 1.06639318946347, 2.28676203427426, 0.466333257890519, 0.640976976629704, NA  
"22965", "AL021308.1", 0.560053778104421, 1.16572506957781, 1.81476236611075, 0.642356867955166, 0.520641498179833, NA  
"22966", "TMEM31", 2.07080505399783, 0.379765320805229, 1.05063964566756, 0.361461060765445, 0.71775480901875, NA  
"22967", "RNF128", 0, NA, NA, NA, NA, NA  
"22968", "CLDN2", 0, NA, NA, NA, NA, NA  
"22969", "NUP62CL", 0.275489739162904, -0.333877366261583, 3.20869724067456, -0.104053870221608, 0.917126598293383, NA  
"22970", "FRMPD3", 0.233061356241168, -0.774663445836492, 3.35085807648355, -0.231183603767975, 0.817172167312465, NA  
"22971", "AL109946.1", 0.142120095111522, -0.0533240139618842, 3.35247519753738, -0.0159058638229611, 0.987309491940711, NA  
"22972", "VSIG1", 0.62523631670283, 0.880512397401394, 2.02975682131777, 0.433801915654971, 0.664432290399616, NA  
"22973", "COL4A5", 0.744962597075613, -1.27705735188907, 1.71657627689683, -0.743956076451024, 0.456903048421816, NA  
"22974", "RTL9", 0, NA, NA, NA, NA, NA  
"22975", "DCX", 0.102686272020481, -0.0533240139618846, 3.35247519753738, -0.0159058638229612, 0.987309491940711, NA  
"22976", "TRPC5", 0, NA, NA, NA, NA, NA  
"22977", "IL13RA2", 1.17703125619544, -0.858046752370813, 1.41381936941751, -0.606899842321673, 0.543917382775439, NA  
"22978", "PLS3-AS1", 0.501057349609558, 0.924052305569553, 2.34443988536703, 0.394146299650114, 0.693473029783216, NA  
"22979", "BX119904.2", 0.342841240398645, 1.50148732313724, 2.93271156488077, 0.511979200790679, 0.608665566347773, NA  
"22980", "AC004000.1", 2.3280393571805, 1.02940653507593, 1.11057130448692, 0.926916201523422, 0.353970044588205, NA  
"22981", "SOWAHD", 0, NA, NA, NA, NA, NA  
"22982", "RH0XF1-AS1", 1.24752658314984, -4.22998780580597, 1.74647966382095, -2.42200805049834, 0.0154350085997304, NA  
"22983", "RH0XF1", 1.37973363893484, 1.61111034630985, 1.4456292222656, 1.11446996331806, 0.265077623348129, NA  
"22984", "GLUD2", 2.3086496522017, -0.160727184539196, 0.963637087602906, -0.166792236005582, 0.867533527882274, NA  
"22985", "AC002377.1", 2.25073649359229, -0.60373626060047, 1.28912834708686, -0.468329055027592, 0.639549293629349, NA  
"22986", "TEX13D", 0.102686272020481, -0.0533240139618846, 3.3524751975373



8,-0.0159058638229612,0.987309491940711,NA  
"22987","TEX13C",0.219614265997676,-1.35173207482145,3.35247519753738,-0.40320419844251,0.686798011343181,NA  
"22988","AL008633.1",0.936700618364064,1.99334341278798,1.60053858959307,1.24542040145047,0.212977257894791,NA  
"22989","AL022162.1",1.15116136891758,-0.162575880303247,1.28862061197995,-0.12616271910586,0.899603121353456,NA  
"22990","AL034405.1",1.72849562326918,0.189462681646542,1.16476461586247,0.162661776522332,0.870784744006097,NA  
"22991","IGSF1",0.439677569991484,0.279268974458065,2.42445800272399,0.11518820872306,0.908295944540891,NA  
"22992","FIRRE",1.19772289886548,0.35562102608241,1.41130639358045,0.251980029070943,0.801056500332185,NA  
"22993","HS6ST2",1.11200997219522,0.159588380079412,1.41427659732358,0.112840996154092,0.910156615659803,NA  
"22994","AC002407.1",0.322875578662423,0.229521205917847,2.32264188371235,0.098819024804201,0.921281962818188,NA  
"22995","PLAC1",0,NA,NA,NA,NA,NA  
"22996","AL672032.1",0.489431372902036,-1.96699669537352,2.30888160054858,-0.851926185780237,0.394255062029583,NA  
"22997","SMIM10L2B-AS1",0.43575510516448,1.79914012700038,2.39188830559283,0.752184005747067,0.451940410737528,NA  
"22998","INTS6L-AS1",0.0644961186387932,-0.0533240139618838,3.35247519753738,-0.015905863822961,0.987309491940711,NA  
"22999","GPR101",0,NA,NA,NA,NA,NA  
"23000","MCF2",0.37759929004657,0.381134982021306,2.25853338012443,0.168753309282641,0.865990685290599,NA  
"23001","SPANXA2-OT1",0.168565237602375,-1.35173207482145,3.35247519753738,-0.40320419844251,0.686798011343181,NA  
"23002","FMR1-AS1",0.553979047316224,0.690259803655213,2.28750805723943,0.301751856773007,0.762841233732517,NA  
"23003","FMR1-IT1",1.38096742347302,0.153622545402015,1.42004457597454,0.108181495145382,0.91385172353469,NA  
"23004","AFF2",0.100823152638361,-1.35173207482145,3.35247519753738,-0.40320419844251,0.686798011343181,NA  
"23005","AC244197.2",0.370236480520519,-0.776097354626079,2.25816971304894,-0.343684245759458,0.731083760326458,NA  
"23006","AF274853.1",0.767801432303311,0.868599397206453,1.58652203165078,0.547486501843705,0.584044541437389,NA  
"23007","FATE1",1.77078555164697,0.132190190519467,1.14526817587289,0.115422914304517,0.908109917351482,NA  
"23008","PNMA5",0.204461874445769,-1.96013641505178,3.33548947920397,-0.587660799793491,0.556759992345141,NA  
"23009","PNMA3",0.752451409249799,-1.44060422987065,1.88681355397185,-0.763511703018084,0.445158285572867,NA

"23010", "ATP2B3", 0.102230937222884, -1.35173207482145, 3.35247519753738, -0.403204198442509, 0.686798011343181, NA  
"23011", "PLXNB3", 0.50177804257111, 0.858865557992969, 2.12290362454307, 0.404571148715162, 0.685792769516777, NA  
"23012", "SRPK3", 0.838799054230106, 0.414926445529434, 2.05664355633489, 0.201749323187956, 0.840112701015791, NA  
"23013", "L1CAM", 0, NA, NA, NA, NA, NA  
"23014", "AVPR2", 0.0534622507802646, -0.0533240139618838, 3.35247519753738, -0.015905863822961, 0.987309491940711, NA  
"23015", "HCFC1-AS1", 0, NA, NA, NA, NA, NA  
"23016", "TKTL1", 0.441949084704722, 0.631648184503036, 2.48013843998428, 0.254682631549809, 0.798968232005048, NA  
"23017", "AC245140.1", 0.203054089861245, -1.95461545718866, 3.33573296423696, -0.585962808817275, 0.557900507779092, NA  
"23018", "AC244090.3", 0.837742039945957, -2.26006851715665, 1.82830642376282, -1.23615411934353, 0.216401281310014, NA  
"23019", "MTCP1", 1.1456396769486, -0.179313989367408, 1.4982230380391, -0.119684442712947, 0.90473312468175, NA  
"23020", "RAB39B", 0.484128806138642, 1.97155403877773, 2.28503389058586, 0.862811727607348, 0.388240990091437, NA  
"23021", "AC234781.1", 0.67228988823652, -2.4880023399648, 2.18566687585963, -1.13832641535836, 0.254984207787919, NA  
"23022", "TMLHE-AS1", 1.49140837395271, -0.612900634530952, 1.33819785507333, -0.458004496276351, 0.646949210967232, NA  
"23023", "BX571846.1", 0.287785067625315, -0.774666036310719, 3.12039593109626, -0.248258891953677, 0.803934102976972, NA  
"23024", "IL9R", 0.102230937222884, -1.35173207482145, 3.35247519753738, -0.403204198442509, 0.686798011343181, NA  
"23025", "AC006040.1", 0.23843966004588, 0.69583062743856, 3.33747149429751, 0.208490358233014, 0.834846110249776, NA  
"23026", "PCDH11Y", 0.287785067625315, -0.774666036310719, 3.12039593109626, -0.248258891953677, 0.803934102976972, NA  
"23027", "TTY10", 0.747260729922823, -0.73115079211949, 1.79633154384443, -0.407024412962606, 0.683990057869398, NA  
"23028", "LINC00266-4P", 0.428522315793736, 1.66405784528808, 2.17500955680563, 0.765080705085282, 0.444223488631033, NA  
"23029", "BX004987.1", 0.519719385158092, 0.881365331479571, 1.93396907449084, 0.455728761697812, 0.648585036860347, NA  
"23030", "AL645608.2", 0.23843966004588, 0.69583062743856, 3.33747149429751, 0.208490358233014, 0.834846110249776, NA  
"23031", "PERM1", 0, NA, NA, NA, NA, NA  
"23032", "AL645608.8", 0, NA, NA, NA, NA, NA  
"23033", "AL139287.1", 0.11921983002294, -0.0533240139618846, 3.35247519753738, -0.0159058638229612, 0.987309491940711, NA  
"23034", "GABRD", 0.168565237602375, -1.35173207482145, 3.35247519753738, -0.40320419844251, 0.686798011343181, NA  
"23035", "AL354743.2", 0.255108556056986, -1.37243947120329, 3.28104337859569, -0.418293607501983, 0.675732462863087, NA  
"23036", "ARHGEF16", 0.168565237602375, -1.35173207482145, 3.35247519753738

8,-0.40320419844251,0.686798011343181,NA  
"23037","AL805961.1",0,NA,NA,NA,NA,NA  
"23038","AL359881.1",0,NA,NA,NA,NA,NA  
"23039","AL139424.1",0,NA,NA,NA,NA,NA  
"23040","EXOSC10-  
AS1",2.14039745806474,-0.0853940818881685,1.03321502458863,-0.08264889  
67503816,0.934130720257613,NA  
"23041","AL031731.1",0,NA,NA,NA,NA,NA  
"23042","NPPA",0,NA,NA,NA,NA,NA  
"23043","LRR38",0.481273423541694,0.616171887409792,2.38549784041638,  
0.258299075761159,0.796176099506425,NA  
"23044","AL031283.2",0.142120095111522,-0.0533240139618842,3.352475197  
53738,-0.0159058638229611,0.987309491940711,NA  
"23045","CLCNKA",0,NA,NA,NA,NA,NA  
"23046","PADI3",0.201646305276721,-1.9490730241217,3.3359781915796,-0.  
584258323103367,0.559046527482917,NA  
"23047","AL031005.2",0.183715948661733,0.576034712544328,3.34068880739  
852,0.172429922616139,0.863099549623161,NA  
"23048","AL450043.1",0,NA,NA,NA,NA,NA  
"23049","NCMAP",0,NA,NA,NA,NA,NA  
"23050","AL033528.2",0.142120095111522,-0.0533240139618842,3.352475197  
53738,-0.0159058638229611,0.987309491940711,NA  
"23051","EXTL1",0.62127899277657,0.447175964084433,1.95601855113451,0.  
22861540031155,0.819167853823214,NA  
"23052","KDF1",0,NA,NA,NA,NA,NA  
"23053","CD164L2",0,NA,NA,NA,NA,NA  
"23054","AL020997.4",0.0644961186387932,-0.0533240139618838,3.35247519  
753738,-0.015905863822961,0.987309491940711,NA  
"23055","AL353622.2",0.0534622507802646,-0.0533240139618838,3.35247519  
753738,-0.015905863822961,0.987309491940711,NA  
"23056","OPRD1",0,NA,NA,NA,NA,NA  
"23057","ZBTB8B",0,NA,NA,NA,NA,NA  
"23058","GJB3",1.80541334807223,-4.69469240091182,1.63723754047148,-2.  
86744732200551,0.00413797684894377,NA  
"23059","AL138787.2",0,NA,NA,NA,NA,NA  
"23060","EPA10",0,NA,NA,NA,NA,NA  
"23061","AL033527.3",0,NA,NA,NA,NA,NA  
"23062","AL031985.4",0,NA,NA,NA,NA,NA  
"23063","AL031289.2",0,NA,NA,NA,NA,NA  
"23064","AL391730.2",0.472012082945807,-2.14556336936911,2.31825841610  
599,-0.925506558916343,0.3547024735504,NA  
"23065","CLDN19",0,NA,NA,NA,NA,NA  
"23066","AC098484.1",0.0534622507802646,-0.0533240139618838,3.35247519  
753738,-0.015905863822961,0.987309491940711,NA  
"23067","TMEM125",0.168565237602375,-1.35173207482145,3.35247519753738  
,-0.40320419844251,0.686798011343181,NA  
"23068","C1orf210",0.154285403418625,-0.774663427007578,3.352475197537  
38,-0.231072082972193,0.817258802814835,NA  
"23069","AL139289.3",0,NA,NA,NA,NA,NA  
"23070","AL357079.2",0.201646305276721,-1.9490730241217,3.335978191579

6,-0.584258323103367,0.559046527482917,NA  
"23071","AL358075.2",0.201646305276721,-1.9490730241217,3.335978191579  
6,-0.584258323103367,0.559046527482917,NA  
"23072","LINC01389",0.203054089861245,-1.95461545718866,3.335732964236  
96,-0.585962808817275,0.557900507779092,NA  
"23073","FOX E3",0,NA,NA,NA,NA,NA  
"23074","ELAVL4",0,NA,NA,NA,NA,NA  
"23075","AL162430.2",0.426360285334567,1.65695407184322,3.300800490968  
78,0.501985526352398,0.615677702148379,NA  
"23076","ZYG11A",0.287785067625315,-0.774666036310719,3.12039593109626  
, -0.248258891953677,0.803934102976972,NA  
"23077","AL161644.1",0,NA,NA,NA,NA,NA  
"23078","DAB1-  
AS1",0.11921983002294,-0.0533240139618846,3.35247519753738,-0.01590586  
38229612,0.987309491940711,NA  
"23079","CYP2J2",0,NA,NA,NA,NA,NA  
"23080","AL513493.1",0,NA,NA,NA,NA,NA  
"23081","AC093158.1",0.388177823107502,-0.770699685600376,2.5195854950  
8263,-0.30588352215256,0.759693332445144,NA  
"23082","MSH4",0.303877242499606,-2.34617912601169,3.02976049563007,-0  
.774377753421653,0.438707435439005,NA  
"23083","AC093423.2",0,NA,NA,NA,NA,NA  
"23084","AL109613.1",0,NA,NA,NA,NA,NA  
"23085","DPYD-AS2",0,NA,NA,NA,NA,NA  
"23086","AL589990.1",0,NA,NA,NA,NA,NA  
"23087","LINC01307",0,NA,NA,NA,NA,NA  
"23088","AC095032.1",0.29431150855474,0.140890502842091,3.188503122080  
21,0.0441870361883708,0.964755315584153,NA  
"23089","C1orf194",0.559600123799373,-0.844364336569349,2.086932357600  
36,-0.404595929280733,0.685774551256064,NA  
"23090","MYBPHL",0,NA,NA,NA,NA,NA  
"23091","GPR61",0.0644961186387932,-0.0533240139618838,3.3524751975373  
8,-0.015905863822961,0.987309491940711,NA  
"23092","AL603832.2",0.11921983002294,-0.0533240139618846,3.3524751975  
3738,-0.0159058638229612,0.987309491940711,NA  
"23093","LINC01356",0,NA,NA,NA,NA,NA  
"23094","LINC01357",0.168565237602375,-1.35173207482145,3.352475197537  
38,-0.40320419844251,0.686798011343181,NA  
"23095","AL591742.2",0.363570862357347,-0.0560033712720379,2.588782893  
56983,-0.0216330892061835,0.982740638333437,NA  
"23096","AL049825.1",0.106924501560529,0.385965786494404,3.34626872025  
989,0.115342137395477,0.908173940404949,NA  
"23097","NHLH2",0,NA,NA,NA,NA,NA  
"23098","SRGAP2-AS1",0,NA,NA,NA,NA,NA  
"23099","AC245014.1",0,NA,NA,NA,NA,NA  
"23100","AC239860.4",0.142120095111522,-0.0533240139618842,3.352475197  
53738,-0.0159058638229611,0.987309491940711,NA  
"23101","GJA5",0,NA,NA,NA,NA,NA  
"23102","NOTCH2NLB",0.429344745425356,-0.290579024516812,2.45346341578  
964,-0.118436257352258,0.905721998723172,NA

"23103", "AC242842.1", 0, NA, NA, NA, NA, NA  
"23104", "CA14", 0, NA, NA, NA, NA, NA  
"23105", "AL590133.2", 0, NA, NA, NA, NA, NA  
"23106", "AL590133.1", 0, NA, NA, NA, NA, NA  
"23107", "AL589765.7", 0.11921983002294, -0.0533240139618846, 3.3524751975  
3738, -0.0159058638229612, 0.987309491940711, NA  
"23108", "AL589765.4", 0.219614265997676, -1.35173207482145, 3.35247519753  
738, -0.40320419844251, 0.686798011343181, NA  
"23109", "AL450992.3", 0.128992237277586, 0.513744972953418, 3.34245151459  
318, 0.153703044220807, 0.877843884367224, NA  
"23110", "LCE1C", 0, NA, NA, NA, NA, NA  
"23111", "LCE1B", 0, NA, NA, NA, NA, NA  
"23112", "SPRR2G", 0, NA, NA, NA, NA, NA  
"23113", "AQP10", 0.201646305276721, -1.9490730241217, 3.3359781915796, -0.  
584258323103367, 0.559046527482917, NA  
"23114", "AL592078.2", 0, NA, NA, NA, NA, NA  
"23115", "DCST1", 0, NA, NA, NA, NA, NA  
"23116", "PKLR", 0, NA, NA, NA, NA, NA  
"23117", "RAB25", 0.221450767245824, -0.774663427007578, 3.35247519753738,  
-0.231072082972194, 0.817258802814834, NA  
"23118", "AL365181.1", 0, NA, NA, NA, NA, NA  
"23119", "AL365181.4", 0, NA, NA, NA, NA, NA  
"23120", "AL365181.3", 0.219614265997676, -1.35173207482145, 3.35247519753  
738, -0.40320419844251, 0.686798011343181, NA  
"23121", "AL590666.1", 0, NA, NA, NA, NA, NA  
"23122", "LINC02772", 0, NA, NA, NA, NA, NA  
"23123", "FCRL4", 0, NA, NA, NA, NA, NA  
"23124", "CD5L", 0, NA, NA, NA, NA, NA  
"23125", "AL590560.5", 0, NA, NA, NA, NA, NA  
"23126", "CASQ1", 0, NA, NA, NA, NA, NA  
"23127", "AL138930.1", 0, NA, NA, NA, NA, NA  
"23128", "APOA2", 0, NA, NA, NA, NA, NA  
"23129", "PCP4L1", 0, NA, NA, NA, NA, NA  
"23130", "AL626787.1", 0.11921983002294, -0.0533240139618846, 3.3524751975  
3738, -0.0159058638229612, 0.987309491940711, NA  
"23131", "AL596087.3", 0.11921983002294, -0.0533240139618846, 3.3524751975  
3738, -0.0159058638229612, 0.987309491940711, NA  
"23132", "AL359962.1", 0, NA, NA, NA, NA, NA  
"23133", "DNM3-IT1", 0, NA, NA, NA, NA, NA  
"23134", "AL137157.1", 0.479374892471858, -1.25516923542787, 2.37332265359  
243, -0.528865821732227, 0.596898533007798, NA  
"23135", "AL031599.1", 0.640937130765032, 1.3344829754663, 1.9850404759203  
, 0.672269906661532, 0.501411884097722, NA  
"23136", "TNFSF18", 0.203054089861245, -1.95461545718866, 3.33573296423696  
, -0.585962808817275, 0.557900507779092, NA  
"23137", "LINC02776", 0.851740774655501, -0.830564149965398, 1.47582022714  
114, -0.562781383999804, 0.573583758258544, NA  
"23138", "TDRD5", 0.142120095111522, -0.0533240139618842, 3.35247519753738  
, -0.0159058638229611, 0.987309491940711, NA  
"23139", "AL133553.1", 0.142120095111522, -0.0533240139618842, 3.352475197

53738,-0.0159058638229611,0.987309491940711,NA  
"23140","PDC",0.23843966004588,0.69583062743856,3.33747149429751,0.208  
490358233014,0.834846110249776,NA  
"23141","LINC01724",0.203054089861245,-1.95461545718866,3.335732964236  
96,-0.585962808817275,0.557900507779092,NA  
"23142","GPR25",0,NA,NA,NA,NA,NA  
"23143","TNNT2",0.102230937222884,-1.35173207482145,3.35247519753738,-  
0.403204198442509,0.686798011343181,NA  
"23144","ERLNC1",0,NA,NA,NA,NA,NA  
"23145","CAMK1G",0,NA,NA,NA,NA,NA  
"23146","AL034351.4",0,NA,NA,NA,NA,NA  
"23147","AL034351.3",0,NA,NA,NA,NA,NA  
"23148","LPGAT1-AS1",0,NA,NA,NA,NA,NA  
"23149","LINC02608",0.0534622507802646,-0.0533240139618838,3.352475197  
53738,-0.015905863822961,0.987309491940711,NA  
"23150","AC092803.3",0,NA,NA,NA,NA,NA  
"23151","SPATA45",0.56536349161471,-0.830830223287907,1.84593063505588  
,-0.450087455893356,0.652647381401618,NA  
"23152","LINC02765",0,NA,NA,NA,NA,NA  
"23153","LINC01641",0.11921983002294,-0.0533240139618846,3.35247519753  
738,-0.0159058638229612,0.987309491940711,NA  
"23154","AL353593.2",0,NA,NA,NA,NA,NA  
"23155","LINC02814",0,NA,NA,NA,NA,NA  
"23156","LINC00582",0.0534622507802646,-0.0533240139618838,3.352475197  
53738,-0.015905863822961,0.987309491940711,NA  
"23157","AL355472.3",0,NA,NA,NA,NA,NA  
"23158","AL161640.2",0.0534622507802646,-0.0533240139618838,3.35247519  
753738,-0.015905863822961,0.987309491940711,NA  
"23159","AL160408.4",0.100823152638361,-1.35173207482145,3.35247519753  
738,-0.40320419844251,0.686798011343181,NA  
"23160","AL160408.3",0.11921983002294,-0.0533240139618846,3.3524751975  
3738,-0.0159058638229612,0.987309491940711,NA  
"23161","AL391832.1",0,NA,NA,NA,NA,NA  
"23162","LYST-AS1",0,NA,NA,NA,NA,NA  
"23163","WDR64",0,NA,NA,NA,NA,NA  
"23164","AL606534.1",0,NA,NA,NA,NA,NA  
"23165","AL662889.1",0.11921983002294,-0.0533240139618846,3.3524751975  
3738,-0.0159058638229612,0.987309491940711,NA  
"23166","AL645465.1",0.128992237277586,0.513744972953418,3.34245151459  
318,0.153703044220807,0.877843884367224,NA  
"23167","AL591848.2",0.106924501560529,0.385965786494404,3.34626872025  
989,0.115342137395477,0.908173940404949,NA  
"23168","OR2G6",0,NA,NA,NA,NA,NA  
"23169","AC098483.1",0,NA,NA,NA,NA,NA  
"23170","LYPD8",0,NA,NA,NA,NA,NA  
"23171","SNTG2-AS1",0,NA,NA,NA,NA,NA  
"23172","SNTG2",0,NA,NA,NA,NA,NA  
"23173","LINC01250",0,NA,NA,NA,NA,NA  
"23174","AC092580.2",0,NA,NA,NA,NA,NA  
"23175","LINC01954",0,NA,NA,NA,NA,NA

"23176", "AC062028.1", 0, NA, NA, NA, NA, NA  
"23177", "AC009486.2", 0.11921983002294, -0.0533240139618846, 3.3524751975  
3738, -0.0159058638229612, 0.987309491940711, NA  
"23178", "AC064875.1", 0, NA, NA, NA, NA, NA  
"23179", "AC068286.2", 0, NA, NA, NA, NA, NA  
"23180", "HS1BP3-IT1", 0, NA, NA, NA, NA, NA  
"23181", "LINC01381", 0.507397653130442, -0.12186569960782, 2.391317540076  
29, -0.0509617386923577, 0.959356009010124, NA  
"23182", "AC104699.1", 0, NA, NA, NA, NA, NA  
"23183", "DRC1", 0, NA, NA, NA, NA, NA  
"23184", "C2orf16", 0.11921983002294, -0.0533240139618846, 3.3524751975373  
8, -0.0159058638229612, 0.987309491940711, NA  
"23185", "KCNG3", 0, NA, NA, NA, NA, NA  
"23186", "EPCAM", 0.48286734553476, 1.98084231617716, 2.65651811096493, 0.7  
45653608759949, 0.455876689942655, NA  
"23187", "AC007250.1", 0.165319271277154, -0.774663427007578, 3.3524751975  
3738, -0.231072082972193, 0.817258802814835, NA  
"23188", "LINC01122", 0, NA, NA, NA, NA, NA  
"23189", "AC007381.2", 0, NA, NA, NA, NA, NA  
"23190", "AC093159.1", 0, NA, NA, NA, NA, NA  
"23191", "LINC01805", 0.492690782775617, -1.81310017638483, 2.739942377163  
99, -0.661729309162151, 0.50814471752379, NA  
"23192", "LINC01828", 0.102230937222884, -1.35173207482145, 3.352475197537  
38, -0.403204198442509, 0.686798011343181, NA  
"23193", "AC015969.1", 0, NA, NA, NA, NA, NA  
"23194", "LINC01890", 0, NA, NA, NA, NA, NA  
"23195", "FIGLA", 0, NA, NA, NA, NA, NA  
"23196", "CD207", 0, NA, NA, NA, NA, NA  
"23197", "AC073046.3", 0, NA, NA, NA, NA, NA  
"23198", "AC073263.1", 0.475297862698928, -0.954426248072142, 2.0997337411  
8749, -0.454546321445677, 0.649435659928783, NA  
"23199", "DQX1", 0, NA, NA, NA, NA, NA  
"23200", "AC007387.2", 0, NA, NA, NA, NA, NA  
"23201", "LINC01291", 0.11921983002294, -0.0533240139618846, 3.35247519753  
738, -0.0159058638229612, 0.987309491940711, NA  
"23202", "AC104135.1", 0.11921983002294, -0.0533240139618846, 3.3524751975  
3738, -0.0159058638229612, 0.987309491940711, NA  
"23203", "LINC01293", 0, NA, NA, NA, NA, NA  
"23204", "AC104134.1", 0, NA, NA, NA, NA, NA  
"23205", "IGKV4-1", 0.914795361497019, 2.87611128495574, 1.95680585312205,  
1.46979899940863, 0.141616200247168, NA  
"23206", "IGKV1-5", 0.434022005937667, 1.68901106383714, 2.4394619206469, 0  
.692370333614083, 0.488704791200103, NA  
"23207", "IGKV1-6", 0, NA, NA, NA, NA, NA  
"23208", "IGKV1-9", 0.11921983002294, -0.0533240139618846, 3.3524751975373  
8, -0.0159058638229612, 0.987309491940711, NA  
"23209", "IGKV3-11", 0.349035219938887, 0.278666737377577, 2.5845198956420  
5, 0.107821471155033, 0.914137310660263, NA  
"23210", "IGKV3-15", 0.168565237602375, -1.35173207482145, 3.3524751975373  
8, -0.40320419844251, 0.686798011343181, NA

"23211", "IGKV1-17", 0.142120095111522, -0.0533240139618842, 3.35247519753738, -0.0159058638229611, 0.987309491940711, NA  
"23212", "IGKV3-20", 0.474356398883996, 1.90346463734428, 2.27918430519571, 0.835151695720733, 0.403632302968811, NA  
"23213", "IGKV6-21", 0.220042982661301, -0.774663427007579, 3.35247519753738, -0.231072082972194, 0.817258802814834, NA  
"23214", "IGKV2-30", 0, NA, NA, NA, NA, NA  
"23215", "IGKV1-39", 0.231223174500471, -0.207595008908767, 3.34245142718562, -0.062108609034766, 0.950476341218052, NA  
"23216", "IGKV2D-30", 0.0534622507802646, -0.0533240139618838, 3.35247519753738, -0.015905863822961, 0.987309491940711, NA  
"23217", "IGKV3D-20", 0, NA, NA, NA, NA, NA  
"23218", "IGKV1D-13", 0, NA, NA, NA, NA, NA  
"23219", "AC103563.9", 0, NA, NA, NA, NA, NA  
"23220", "CNGA3", 0.100823152638361, -1.35173207482145, 3.35247519753738, -0.40320419844251, 0.686798011343181, NA  
"23221", "CREG2", 0.100823152638361, -1.35173207482145, 3.35247519753738, -0.40320419844251, 0.686798011343181, NA  
"23222", "AC012360.1", 0.55362858046378, -0.802463038629043, 2.34835225491074, -0.341713231884602, 0.732566713310455, NA  
"23223", "AC018878.1", 0, NA, NA, NA, NA, NA  
"23224", "CD8B2", 0.541459469218236, -2.9452539702196, 2.57595994684813, -1.14336171019403, 0.252888443169467, NA  
"23225", "AC108868.1", 0, NA, NA, NA, NA, NA  
"23226", "RGP4-AS1", 0, NA, NA, NA, NA, NA  
"23227", "RGP4", 0, NA, NA, NA, NA, NA  
"23228", "AC112229.2", 0, NA, NA, NA, NA, NA  
"23229", "NT5DC4", 0.100823152638361, -1.35173207482145, 3.35247519753738, -0.40320419844251, 0.686798011343181, NA  
"23230", "AC016745.1", 0.0644961186387932, -0.0533240139618838, 3.35247519753738, -0.015905863822961, 0.987309491940711, NA  
"23231", "FAM138B", 0.360901617168941, 0.230411879331194, 2.25850683522134, 0.102019562543681, 0.918741147434149, NA  
"23232", "AC017074.1", 0, NA, NA, NA, NA, NA  
"23233", "AC110769.1", 0, NA, NA, NA, NA, NA  
"23234", "STEAP3-AS1", 0.494527284023765, -0.958122027579534, 2.107037116483, -0.454724798193778, 0.649307238119615, NA  
"23235", "AC018866.1", 0.338834096020616, -0.774667674034573, 2.96546850953071, -0.261229438635032, 0.793915577320881, NA  
"23236", "AC079776.5", 0.100823152638361, -1.35173207482145, 3.35247519753738, -0.40320419844251, 0.686798011343181, NA  
"23237", "NCKAP5-AS2", 0.22202748838264, -0.774663427007578, 3.35247519753738, -0.231072082972193, 0.817258802814835, NA  
"23238", "ACMSD", 0, NA, NA, NA, NA, NA  
"23239", "AC079584.2", 0, NA, NA, NA, NA, NA  
"23240", "AC092484.1", 0, NA, NA, NA, NA, NA  
"23241", "AC079248.1", 0.172682080803205, 0.494635591052761, 3.34300496985029, 0.147961368742719, 0.882373255878367, NA



"23242", "LINC01931", 0.218781522057418, -0.267643672651118, 2.94083342748661, -0.0910094635587233, 0.927485071432953, NA  
"23243", "AC009299.3", 0.0534622507802646, -0.0533240139618838, 3.35247519753738, -0.015905863822961, 0.987309491940711, NA  
"23244", "AC008063.2", 0.597763659047089, -1.01098514386858, 1.82276032701798, -0.554645132924602, 0.579137411847956, NA  
"23245", "SCN1A-AS1", 0.203054089861245, -1.95461545718866, 3.33573296423696, -0.585962808817275, 0.557900507779092, NA  
"23246", "AC007277.1", 0.100823152638361, -1.35173207482145, 3.35247519753738, -0.40320419844251, 0.686798011343181, NA  
"23247", "GAD1", 0.201646305276721, -1.9490730241217, 3.3359781915796, -0.584258323103367, 0.559046527482917, NA  
"23248", "AC078883.2", 0, NA, NA, NA, NA, NA  
"23249", "AC010894.4", 0, NA, NA, NA, NA, NA  
"23250", "AC096649.1", 0.20774765419889, -0.335374473295219, 3.34626863491525, -0.10022341595528, 0.920166956363588, NA  
"23251", "AC079305.1", 0.320866135299661, -1.37464340165215, 3.04127275254598, -0.451996092919114, 0.651271797119151, NA  
"23252", "AC020584.1", 0, NA, NA, NA, NA, NA  
"23253", "ASDURF", 0.102230937222884, -1.35173207482145, 3.35247519753738, -0.403204198442509, 0.686798011343181, NA  
"23254", "AC104823.1", 0, NA, NA, NA, NA, NA  
"23255", "AC010746.2", 0, NA, NA, NA, NA, NA  
"23256", "AC020550.2", 0.142120095111522, -0.0533240139618842, 3.35247519753738, -0.0159058638229611, 0.987309491940711, NA  
"23257", "AC016746.1", 0, NA, NA, NA, NA, NA  
"23258", "CRYGD", 0, NA, NA, NA, NA, NA  
"23259", "UNC80", 0, NA, NA, NA, NA, NA  
"23260", "LANCL1-AS1", 0, NA, NA, NA, NA, NA  
"23261", "CPS1-IT1", 0, NA, NA, NA, NA, NA  
"23262", "ERBB4", 0.100823152638361, -1.35173207482145, 3.35247519753738, -0.40320419844251, 0.686798011343181, NA  
"23263", "SPAG16-DT", 0, NA, NA, NA, NA, NA  
"23264", "LINC01614", 0, NA, NA, NA, NA, NA  
"23265", "AC098820.2", 0, NA, NA, NA, NA, NA  
"23266", "AC007557.3", 0, NA, NA, NA, NA, NA  
"23267", "WNT6", 0.11921983002294, -0.0533240139618846, 3.35247519753738, -0.0159058638229612, 0.987309491940711, NA  
"23268", "AC009955.3", 0.100823152638361, -1.35173207482145, 3.35247519753738, -0.40320419844251, 0.686798011343181, NA  
"23269", "AC067956.1", 1.27031177940899, -2.42510835901565, 1.6793022641992, -1.44411664934669, 0.148706165488939, NA  
"23270", "CCDC140", 0.203054089861245, -1.95461545718866, 3.33573296423696, -0.585962808817275, 0.557900507779092, NA  
"23271", "AC013476.1", 0.11921983002294, -0.0533240139618846, 3.35247519753738, -0.0159058638229612, 0.987309491940711, NA  
"23272", "AC073641.1", 0, NA, NA, NA, NA, NA  
"23273", "AC016717.2", 0.128992237277586, 0.513744972953418, 3.34245151459318, 0.153703044220807, 0.877843884367224, NA

"23274", "AC019130.1", 0.11921983002294, -0.0533240139618846, 3.3524751975  
3738, -0.0159058638229612, 0.987309491940711, NA  
"23275", "ECEL1", 0, NA, NA, NA, NA, NA  
"23276", "AC073254.1", 0.204461874445769, -1.96013641505178, 3.33548947920  
397, -0.587660799793491, 0.556759992345141, NA  
"23277", "AC013726.1", 0.100823152638361, -1.35173207482145, 3.35247519753  
738, -0.40320419844251, 0.686798011343181, NA  
"23278", "SPP2", 0, NA, NA, NA, NA, NA  
"23279", "PRLH", 0, NA, NA, NA, NA, NA  
"23280", "RAB17", 0.0534622507802646, -0.0533240139618838, 3.3524751975373  
8, -0.015905863822961, 0.987309491940711, NA  
"23281", "AC104667.1", 0.226144331583469, 0.885845475851209, 3.33280882803  
988, 0.265795466094045, 0.790396735192843, NA  
"23282", "KLHL30", 0, NA, NA, NA, NA, NA  
"23283", "AC016999.1", 0.11921983002294, -0.0533240139618846, 3.3524751975  
3738, -0.0159058638229612, 0.987309491940711, NA  
"23284", "AC145625.1", 0.370211542879096, -2.53866757706578, 2.85090778608  
902, -0.890476917371089, 0.373209857351095, NA  
"23285", "AC124862.1", 0, NA, NA, NA, NA, NA  
"23286", "AC131097.2", 0.102230937222884, -1.35173207482145, 3.35247519753  
738, -0.403204198442509, 0.686798011343181, NA  
"23287", "AC034195.1", 0.213849003121058, 0.96816891762709, 3.330946363150  
95, 0.290658813464423, 0.771312274283839, NA  
"23288", "SSUH2", 0.102230937222884, -1.35173207482145, 3.35247519753738, -  
0.403204198442509, 0.686798011343181, NA  
"23289", "AC037193.1", 0, NA, NA, NA, NA, NA  
"23290", "SRGAP3-AS2", 0, NA, NA, NA, NA, NA  
"23291", "ATP2B2", 0, NA, NA, NA, NA, NA  
"23292", "AC066580.1", 0, NA, NA, NA, NA, NA  
"23293", "HDAC11-  
AS1", 0.0644961186387932, -0.0533240139618838, 3.35247519753738, -0.015905  
863822961, 0.987309491940711, NA  
"23294", "ZNF385D-  
AS1", 0.11921983002294, -0.0533240139618846, 3.35247519753738, -0.01590586  
38229612, 0.987309491940711, NA  
"23295", "AC099535.2", 0.142120095111522, -0.0533240139618842, 3.352475197  
53738, -0.0159058638229611, 0.987309491940711, NA  
"23296", "RBMS3-AS1", 0, NA, NA, NA, NA, NA  
"23297", "SCN5A", 0, NA, NA, NA, NA, NA  
"23298", "XIRP1", 0.659808951194953, -2.70480362639508, 2.13173278897575, -  
1.26882864512052, 0.20450218616157, NA  
"23299", "MOBP", 0, NA, NA, NA, NA, NA  
"23300", "ENTPD3", 0.261339925134462, 0.693947743382389, 3.27302645474789,  
0.212020206062111, 0.832091270506721, NA  
"23301", "AC099541.1", 0, NA, NA, NA, NA, NA  
"23302", "HHATL", 1.47108773663948, -2.96578470973834, 2.15655053708342, -1  
.37524470618219, 0.169055592545823, NA  
"23303", "AC006058.1", 0, NA, NA, NA, NA, NA  
"23304", "LINC01988", 0, NA, NA, NA, NA, NA  
"23305", "ZNF197-

AS1",0.11921983002294,-0.0533240139618846,3.35247519753738,-0.01590586  
38229612,0.987309491940711,NA  
"23306","TDGF1",0,NA,NA,NA,NA,NA  
"23307","TRES1",0.128992237277586,0.513744972953418,3.34245151459318,0  
.153703044220807,0.877843884367224,NA  
"23308","AC105935.1",0.285946885884618,-0.151037280028445,2.7227218464  
1806,-0.0554729012172675,0.955761718393871,NA  
"23309","AC115284.4",0.284539101300094,-0.150986859606036,2.7266716240  
8639,-0.0553740532128162,0.955840466649586,NA  
"23310","GLYCTK-AS1",0,NA,NA,NA,NA,NA  
"23311","ITI1",0.464394014995707,-0.70222278617937,2.1829280667158,-0  
.321688468294725,0.747688714834795,NA  
"23312","AC115282.1",0,NA,NA,NA,NA,NA  
"23313","AC098969.2",0.106924501560529,0.385965786494404,3.34626872025  
989,0.115342137395477,0.908173940404949,NA  
"23314","AC020655.1",0,NA,NA,NA,NA,NA  
"23315","AC097634.2",0,NA,NA,NA,NA,NA  
"23316","AC097369.2",0,NA,NA,NA,NA,NA  
"23317","AC108690.1",0.11921983002294,-0.0533240139618846,3.3524751975  
3738,-0.0159058638229612,0.987309491940711,NA  
"23318","AC110491.1",0.220042982661301,-0.774663427007579,3.3524751975  
3738,-0.231072082972194,0.817258802814834,NA  
"23319","OR5K1",0,NA,NA,NA,NA,NA  
"23320","GPR15",0.204461874445769,-1.96013641505178,3.33548947920397,-  
0.587660799793491,0.556759992345141,NA  
"23321","AC021660.4",0.352281186264108,-0.153285691053076,2.5634768064  
5525,-0.0597960124574085,0.952318101493915,NA  
"23322","AC131237.1",0.102230937222884,-1.35173207482145,3.35247519753  
738,-0.403204198442509,0.686798011343181,NA  
"23323","AC063944.1",0.142120095111522,-0.0533240139618842,3.352475197  
53738,-0.0159058638229611,0.987309491940711,NA  
"23324","TAGLN3",0,NA,NA,NA,NA,NA  
"23325","LINC02042",0.0644961186387932,-0.0533240139618838,3.352475197  
53738,-0.015905863822961,0.987309491940711,NA  
"23326","CD200R1L-AS1",0,NA,NA,NA,NA,NA  
"23327","CD200R1L",0,NA,NA,NA,NA,NA  
"23328","AC108693.2",0.0534622507802646,-0.0533240139618838,3.35247519  
753738,-0.015905863822961,0.987309491940711,NA  
"23329","IGSF11",0,NA,NA,NA,NA,NA  
"23330","NR1I2",0,NA,NA,NA,NA,NA  
"23331","CASR",0,NA,NA,NA,NA,NA  
"23332","SEMA5B",0.377143955248973,-0.842802200139846,2.52682562173735  
, -0.333541892598178,0.738725272299152,NA  
"23333","ROPN1B",0,NA,NA,NA,NA,NA  
"23334","ALDH1L1",0.314802175914727,1.16511964632437,2.6519779114781,0  
.439339875826864,0.660415284707152,NA  
"23335","LINC01471",0,NA,NA,NA,NA,NA  
"23336","RUVBL1-  
AS1",0.11921983002294,-0.0533240139618846,3.35247519753738,-0.01590586  
38229612,0.987309491940711,NA

"23337", "AC080005.1", 0.261339925134462, 0.693947743382389, 3.27302645474  
789, 0.212020206062111, 0.832091270506721, NA  
"23338", "AC112484.5", 0, NA, NA, NA, NA, NA  
"23339", "LINC02014", 0, NA, NA, NA, NA, NA  
"23340", "AC116424.1", 0, NA, NA, NA, NA, NA  
"23341", "AC107027.1", 0.443794413192313, 1.76500149983804, 2.104523625197  
49, 0.838670318881509, 0.401654338556417, NA  
"23342", "AC092979.2", 0, NA, NA, NA, NA, NA  
"23343", "TM4SF4", 0, NA, NA, NA, NA, NA  
"23344", "WWTR1-IT1", 0, NA, NA, NA, NA, NA  
"23345", "ANKUB1", 0, NA, NA, NA, NA, NA  
"23346", "AC117395.1", 0, NA, NA, NA, NA, NA  
"23347", "AC117394.2", 0, NA, NA, NA, NA, NA  
"23348", "IL12A-AS1", 0, NA, NA, NA, NA, NA  
"23349", "LINC02067", 0.386471127445929, -0.0386990368869363, 2.9481844018  
1732, -0.0131263963214382, 0.989526951792023, NA  
"23350", "SERPINI2", 0, NA, NA, NA, NA, NA  
"23351", "AC079822.1", 0, NA, NA, NA, NA, NA  
"23352", "SEC62-  
AS1", 0.219614265997676, -1.35173207482145, 3.35247519753738, -0.403204198  
44251, 0.686798011343181, NA  
"23353", "AC026316.3", 0.23843966004588, 0.69583062743856, 3.3374714942975  
1, 0.208490358233014, 0.834846110249776, NA  
"23354", "AC026316.2", 0.279606582363734, 1.19594067730093, 3.169854792595  
59, 0.377285634690431, 0.705961346602518, NA  
"23355", "NAALADL2-  
AS2", 0.301674318080791, 1.29247111944335, 2.63305761922093, 0.49086321165  
496, 0.623523198151138, NA  
"23356", "LINC00501", 0, NA, NA, NA, NA, NA  
"23357", "AC069431.1", 0, NA, NA, NA, NA, NA  
"23358", "VWA5B2", 0, NA, NA, NA, NA, NA  
"23359", "ADIPOQ", 0.614132178057329, -1.5692225036616, 1.97398400145989, -  
0.794951986693437, 0.426641431929413, NA  
"23360", "LINC01968", 0.505695712807125, -2.90223896060942, 3.118163106949  
88, -0.930752773689357, 0.351981463997368, NA  
"23361", "LINC00885", 0, NA, NA, NA, NA, NA  
"23362", "AC055764.1", 0, NA, NA, NA, NA, NA  
"23363", "AC107464.1", 0.0644961186387932, -0.0533240139618838, 3.35247519  
753738, -0.015905863822961, 0.987309491940711, NA  
"23364", "AC078852.1", 0, NA, NA, NA, NA, NA  
"23365", "CFAP99", 0.11921983002294, -0.0533240139618846, 3.35247519753738  
, -0.0159058638229612, 0.987309491940711, NA  
"23366", "LINC01587", 0, NA, NA, NA, NA, NA  
"23367", "AC113615.2", 0, NA, NA, NA, NA, NA  
"23368", "AC113615.1", 0, NA, NA, NA, NA, NA  
"23369", "AC099550.1", 0.699735713189557, 0.0400522151889508, 1.7005290333  
2575, 0.0235527970437647, 0.981209324196354, NA  
"23370", "AC097505.1", 0.403330214659409, -0.154738233194793, 2.4753650874  
8665, -0.0625112772160434, 0.950155681585006, NA  
"23371", "AC092436.3", 0, NA, NA, NA, NA, NA

"23372", "AC133961.1", 0, NA, NA, NA, NA, NA  
"23373", "LINC02357", 0.0534622507802646, -0.0533240139618838, 3.352475197  
53738, -0.015905863822961, 0.987309491940711, NA  
"23374", "AC024132.3", 0.937709052465846, -1.52625139260196, 1.69163410332  
634, -0.902234939341091, 0.366932078269581, NA  
"23375", "AC079921.2", 0, NA, NA, NA, NA, NA  
"23376", "AC095057.4", 0.102230937222884, -1.35173207482145, 3.35247519753  
738, -0.403204198442509, 0.686798011343181, NA  
"23377", "AC131953.2", 0, NA, NA, NA, NA, NA  
"23378", "AC108210.1", 0.100823152638361, -1.35173207482145, 3.35247519753  
738, -0.40320419844251, 0.686798011343181, NA  
"23379", "AC106052.1", 0, NA, NA, NA, NA, NA  
"23380", "BEND4", 0, NA, NA, NA, NA, NA  
"23381", "AC096734.2", 0, NA, NA, NA, NA, NA  
"23382", "GABRG1", 0.102230937222884, -1.35173207482145, 3.35247519753738,  
-0.403204198442509, 0.686798011343181, NA  
"23383", "GABRB1", 0, NA, NA, NA, NA, NA  
"23384", "CNGA1", 0, NA, NA, NA, NA, NA  
"23385", "AC104066.3", 0, NA, NA, NA, NA, NA  
"23386", "LINC01618", 0, NA, NA, NA, NA, NA  
"23387", "AC104066.4", 0, NA, NA, NA, NA, NA  
"23388", "ERVMER34-1", 0.333884508879529, -1.5113465063233, 2.584244266864  
41, -0.58483113446435, 0.558661267333854, NA  
"23389", "AC093725.2", 0.206616213750315, 0.576034718369261, 3.34068880723  
66, 0.172429924368129, 0.863099548245903, NA  
"23390", "TMPRSS11E", 0, NA, NA, NA, NA, NA  
"23391", "AC111000.4", 0, NA, NA, NA, NA, NA  
"23392", "FDCSP", 0, NA, NA, NA, NA, NA  
"23393", "RASSF6", 0, NA, NA, NA, NA, NA  
"23394", "ODAPH", 0.142120095111522, -0.0533240139618842, 3.35247519753738  
, -0.0159058638229611, 0.987309491940711, NA  
"23395", "SOWAHB", 0, NA, NA, NA, NA, NA  
"23396", "AC021127.1", 0.219614265997676, -1.35173207482145, 3.35247519753  
738, -0.40320419844251, 0.686798011343181, NA  
"23397", "BMP3", 1.00823152638361, -3.96455496039609, 2.55051327077523, -1.  
55441455875705, 0.120085562705018, NA  
"23398", "NKX6-1", 0, NA, NA, NA, NA, NA  
"23399", "STPG2", 0.0644961186387932, -0.0533240139618838, 3.3524751975373  
8, -0.015905863822961, 0.987309491940711, NA  
"23400", "AC019077.1", 0.154285403418625, -0.774663427007578, 3.3524751975  
3738, -0.231072082972193, 0.817258802814835, NA  
"23401", "ADH6", 0.11921983002294, -0.0533240139618846, 3.35247519753738, -  
0.0159058638229612, 0.987309491940711, NA  
"23402", "AC096577.1", 0, NA, NA, NA, NA, NA  
"23403", "NPNT", 0.100823152638361, -1.35173207482145, 3.35247519753738, -0  
.40320419844251, 0.686798011343181, NA  
"23404", "ETNPPL", 0.275489739162904, -0.333877366261583, 3.20869724067456  
, -0.104053870221608, 0.917126598293383, NA  
"23405", "PITX2", 0.302469457915082, -2.33550018378661, 3.3206786067292, -0  
.703320152409159, 0.481856254557762, NA

"23406", "NDST4", 0.33713047520475, -2.38103637458962, 3.31815804257558, -0.71757774766552, 0.473017682228765, NA  
"23407", "TMEM155", 0, NA, NA, NA, NA, NA  
"23408", "AC079341.2", 0, NA, NA, NA, NA, NA  
"23409", "AC093821.1", 0, NA, NA, NA, NA, NA  
"23410", "SNHG27", 0.480954191132138, -0.0674947330558005, 2.4069584863545, -0.0280415027672646, 0.97762904972822, NA  
"23411", "AC096711.2", 0.183715948661733, 0.576034712544328, 3.34068880739852, 0.172429922616139, 0.863099549623161, NA  
"23412", "AC093916.1", 0, NA, NA, NA, NA, NA  
"23413", "AC096711.1", 0, NA, NA, NA, NA, NA  
"23414", "SLC7A11-AS1", 0, NA, NA, NA, NA, NA  
"23415", "AC108019.2", 0, NA, NA, NA, NA, NA  
"23416", "AC096733.1", 0, NA, NA, NA, NA, NA  
"23417", "AC097504.2", 0, NA, NA, NA, NA, NA  
"23418", "FREM3", 0, NA, NA, NA, NA, NA  
"23419", "AC109811.1", 0.11921983002294, -0.0533240139618846, 3.35247519753738, -0.0159058638229612, 0.987309491940711, NA  
"23420", "AC108206.1", 0, NA, NA, NA, NA, NA  
"23421", "AC097375.1", 0, NA, NA, NA, NA, NA  
"23422", "AC079340.2", 0, NA, NA, NA, NA, NA  
"23423", "AC106882.1", 0, NA, NA, NA, NA, NA  
"23424", "AC097467.3", 0, NA, NA, NA, NA, NA  
"23425", "AC098679.1", 0, NA, NA, NA, NA, NA  
"23426", "TKTL2", 0, NA, NA, NA, NA, NA  
"23427", "AC097534.1", 0, NA, NA, NA, NA, NA  
"23428", "ADAM29", 0.102230937222884, -1.35173207482145, 3.35247519753738, -0.403204198442509, 0.686798011343181, NA  
"23429", "WWC2-AS1", 0, NA, NA, NA, NA, NA  
"23430", "AC084871.3", 0, NA, NA, NA, NA, NA  
"23431", "LINC02436", 0.0644961186387932, -0.0533240139618838, 3.35247519753738, -0.015905863822961, 0.987309491940711, NA  
"23432", "LINC02515", 0, NA, NA, NA, NA, NA  
"23433", "LINC01262", 0, NA, NA, NA, NA, NA  
"23434", "PLEKHG4B", 0, NA, NA, NA, NA, NA  
"23435", "AC026740.3", 0.480954191132138, -0.0674947330558005, 2.4069584863545, -0.0280415027672646, 0.97762904972822, NA  
"23436", "AC114291.1", 0, NA, NA, NA, NA, NA  
"23437", "TERT", 0, NA, NA, NA, NA, NA  
"23438", "AC126768.2", 0, NA, NA, NA, NA, NA  
"23439", "LSINCT5", 0.11921983002294, -0.0533240139618846, 3.35247519753738, -0.0159058638229612, 0.987309491940711, NA  
"23440", "LINC02063", 0.314672155759419, 0.253123291804313, 3.11930621204769, 0.0811473047521514, 0.935324805950557, NA  
"23441", "AC010266.2", 0, NA, NA, NA, NA, NA  
"23442", "LINC02236", 0, NA, NA, NA, NA, NA  
"23443", "AC016575.2", 0, NA, NA, NA, NA, NA  
"23444", "LINC02100", 0.117958369419058, 0.451348601316665, 3.34428110054629, 0.134961322851401, 0.892642454377335, NA  
"23445", "LINC02228", 0, NA, NA, NA, NA, NA

"23446", "AC106754.1", 0.11921983002294, -0.0533240139618846, 3.35247519753738, -0.0159058638229612, 0.987309491940711, NA  
"23447", "AC008766.1", 0, NA, NA, NA, NA, NA  
"23448", "AC138409.3", 0, NA, NA, NA, NA, NA  
"23449", "AC093277.1", 0, NA, NA, NA, NA, NA  
"23450", "AC114977.2", 0, NA, NA, NA, NA, NA  
"23451", "AC112187.3", 0, NA, NA, NA, NA, NA  
"23452", "LINC01033", 0, NA, NA, NA, NA, NA  
"23453", "AC008937.2", 0, NA, NA, NA, NA, NA  
"23454", "AC016644.1", 0, NA, NA, NA, NA, NA  
"23455", "SMIM15-  
AS1", 0.35765949006882, 1.43749688423347, 3.31232068124828, 0.433984816860106, 0.664299466649274, NA  
"23456", "LINC02057", 0, NA, NA, NA, NA, NA  
"23457", "AC092353.1", 0.11921983002294, -0.0533240139618846, 3.35247519753738, -0.0159058638229612, 0.987309491940711, NA  
"23458", "AC091868.2", 0, NA, NA, NA, NA, NA  
"23459", "AC025188.1", 0, NA, NA, NA, NA, NA  
"23460", "AC008581.1", 0.100823152638361, -1.35173207482145, 3.35247519753738, -0.40320419844251, 0.686798011343181, NA  
"23461", "AC026427.1", 0, NA, NA, NA, NA, NA  
"23462", "ACOT12", 0, NA, NA, NA, NA, NA  
"23463", "LINC02059", 0, NA, NA, NA, NA, NA  
"23464", "LINC00461", 0, NA, NA, NA, NA, NA  
"23465", "MEF2C-AS2", 0, NA, NA, NA, NA, NA  
"23466", "AC113167.1", 0, NA, NA, NA, NA, NA  
"23467", "AC074132.1", 0.142120095111522, -0.0533240139618842, 3.35247519753738, -0.0159058638229611, 0.987309491940711, NA  
"23468", "AC117528.1", 0.629713286272861, -0.623663570100929, 1.84492722185937, -0.338042369753958, 0.735331258791461, NA  
"23469", "MCTP1-AS1", 0, NA, NA, NA, NA, NA  
"23470", "AC008592.4", 0, NA, NA, NA, NA, NA  
"23471", "MIR583HG", 0, NA, NA, NA, NA, NA  
"23472", "AC010406.1", 0, NA, NA, NA, NA, NA  
"23473", "AC034236.3", 0, NA, NA, NA, NA, NA  
"23474", "LINC00992", 0, NA, NA, NA, NA, NA  
"23475", "AC093206.1", 0, NA, NA, NA, NA, NA  
"23476", "AC008568.1", 0, NA, NA, NA, NA, NA  
"23477", "AC106786.2", 0.638804793285541, -0.332652930882877, 2.0025286405535, -0.166116441056709, 0.868065315824695, NA  
"23478", "LMNB1-  
DT", 0.11921983002294, -0.0533240139618846, 3.35247519753738, -0.0159058638229612, 0.987309491940711, NA  
"23479", "CCDC192", 0.219614265997676, -1.35173207482145, 3.35247519753738, -0.40320419844251, 0.686798011343181, NA  
"23480", "P4HA2-AS1", 0, NA, NA, NA, NA, NA  
"23481", "IL5", 0, NA, NA, NA, NA, NA  
"23482", "AC004039.1", 0, NA, NA, NA, NA, NA  
"23483", "SOWAHA", 0.102230937222884, -1.35173207482145, 3.35247519753738, -0.403204198442509, 0.686798011343181, NA

"23484", "AC004775.1", 0, NA, NA, NA, NA, NA  
"23485", "AC005355.1", 0, NA, NA, NA, NA, NA  
"23486", "AC022092.1", 0, NA, NA, NA, NA, NA  
"23487", "AC113382.1", 0.100823152638361, -1.35173207482145, 3.35247519753  
738, -0.40320419844251, 0.686798011343181, NA  
"23488", "CXXC5-AS1", 0, NA, NA, NA, NA, NA  
"23489", "AC008667.4", 0.11921983002294, -0.0533240139618846, 3.3524751975  
3738, -0.0159058638229612, 0.987309491940711, NA  
"23490", "PCDHA2", 0, NA, NA, NA, NA, NA  
"23491", "PCDHA6", 0.876364981892456, 0.972736585360306, 1.73001687645366,  
0.562269997824707, 0.573932076341048, NA  
"23492", "PCDHA8", 0.11921983002294, -0.0533240139618846, 3.35247519753738  
, -0.0159058638229612, 0.987309491940711, NA  
"23493", "AC244517.2", 0.11921983002294, -0.0533240139618846, 3.3524751975  
3738, -0.0159058638229612, 0.987309491940711, NA  
"23494", "AC244517.11", 0.47655932330281, -1.26618999946688, 2.09064997795  
647, -0.605644183778925, 0.544751055724551, NA  
"23495", "AC244517.12", 0, NA, NA, NA, NA, NA  
"23496", "AC244517.7", 0, NA, NA, NA, NA, NA  
"23497", "AC008781.1", 0.11921983002294, -0.0533240139618846, 3.3524751975  
3738, -0.0159058638229612, 0.987309491940711, NA  
"23498", "SPRY4-AS1", 0, NA, NA, NA, NA, NA  
"23499", "SPINK5", 0.426360285334567, 1.65695407184322, 3.30080049096878, 0  
.501985526352398, 0.615677702148379, NA  
"23500", "AC116312.1", 0, NA, NA, NA, NA, NA  
"23501", "AC131025.1", 0.0644961186387932, -0.0533240139618838, 3.35247519  
753738, -0.015905863822961, 0.987309491940711, NA  
"23502", "AC131025.2", 0.11921983002294, -0.0533240139618846, 3.3524751975  
3738, -0.0159058638229612, 0.987309491940711, NA  
"23503", "FAT2", 0.0534622507802646, -0.0533240139618838, 3.35247519753738  
, -0.015905863822961, 0.987309491940711, NA  
"23504", "AC008571.2", 0, NA, NA, NA, NA, NA  
"23505", "AC009185.1", 0, NA, NA, NA, NA, NA  
"23506", "FNDC9", 0, NA, NA, NA, NA, NA  
"23507", "IL12B", 0.172682080803205, 0.494635591052761, 3.34300496985029, 0  
.147961368742719, 0.882373255878367, NA  
"23508", "FABP6", 0.100823152638361, -1.35173207482145, 3.35247519753738, -  
0.40320419844251, 0.686798011343181, NA  
"23509", "AC026689.1", 0.388179503600051, -2.37645961319578, 2.86395305033  
592, -0.829783020680815, 0.406661472415033, NA  
"23510", "LINC01187", 0, NA, NA, NA, NA, NA  
"23511", "EFCAB9", 0, NA, NA, NA, NA, NA  
"23512", "AC011407.1", 0.100823152638361, -1.35173207482145, 3.35247519753  
738, -0.40320419844251, 0.686798011343181, NA  
"23513", "LINC01411", 0, NA, NA, NA, NA, NA  
"23514", "AC139491.3", 0, NA, NA, NA, NA, NA  
"23515", "AC139493.2", 0, NA, NA, NA, NA, NA  
"23516", "AC138956.1", 0, NA, NA, NA, NA, NA  
"23517", "CDHR2", 0, NA, NA, NA, NA, NA  
"23518", "SLC34A1", 0, NA, NA, NA, NA, NA



"23519", "AC106795.5", 0.11921983002294, -0.0533240139618846, 3.35247519753738, -0.0159058638229612, 0.987309491940711, NA  
"23520", "AC008443.9", 0, NA, NA, NA, NA, NA  
"23521", "AC138035.2", 0, NA, NA, NA, NA, NA  
"23522", "FOXQ1", 0.272243772837683, 0.0571453309233634, 2.76250420872225, 0.0206860611263267, 0.983496088251948, NA  
"23523", "AL138831.1", 0, NA, NA, NA, NA, NA  
"23524", "C6orf201", 0, NA, NA, NA, NA, NA  
"23525", "AL162718.3", 0, NA, NA, NA, NA, NA  
"23526", "AL136307.1", 0.11921983002294, -0.0533240139618846, 3.35247519753738, -0.0159058638229612, 0.987309491940711, NA  
"23527", "AL162719.1", 0, NA, NA, NA, NA, NA  
"23528", "AL031123.4", 0, NA, NA, NA, NA, NA  
"23529", "AL139095.4", 0, NA, NA, NA, NA, NA  
"23530", "RNF182", 0.0644961186387932, -0.0533240139618838, 3.35247519753738, -0.015905863822961, 0.987309491940711, NA  
"23531", "AL353152.2", 0, NA, NA, NA, NA, NA  
"23532", "AL158198.2", 0, NA, NA, NA, NA, NA  
"23533", "AL451080.1", 0, NA, NA, NA, NA, NA  
"23534", "DCDC2", 0, NA, NA, NA, NA, NA  
"23535", "AL160400.1", 0, NA, NA, NA, NA, NA  
"23536", "AL133268.3", 0, NA, NA, NA, NA, NA  
"23537", "U91328.2", 0, NA, NA, NA, NA, NA  
"23538", "AL121936.1", 0.183715948661733, 0.576034712544328, 3.34068880739852, 0.172429922616139, 0.863099549623161, NA  
"23539", "HIST1H3J", 0, NA, NA, NA, NA, NA  
"23540", "AL662890.1", 0, NA, NA, NA, NA, NA  
"23541", "HCG15", 0.102230937222884, -1.35173207482145, 3.35247519753738, -0.403204198442509, 0.686798011343181, NA  
"23542", "AL645937.4", 0.11921983002294, -0.0533240139618846, 3.35247519753738, -0.0159058638229612, 0.987309491940711, NA  
"23543", "MAS1L", 0, NA, NA, NA, NA, NA  
"23544", "OR2I1P", 0, NA, NA, NA, NA, NA  
"23545", "AL645939.5", 0.142120095111522, -0.0533240139618842, 3.35247519753738, -0.0159058638229611, 0.987309491940711, NA  
"23546", "HCG22", 0, NA, NA, NA, NA, NA  
"23547", "DDX39B-AS1", 0, NA, NA, NA, NA, NA  
"23548", "EHMT2-AS1", 0, NA, NA, NA, NA, NA  
"23549", "HLA-DQB1-AS1", 0, NA, NA, NA, NA, NA  
"23550", "GRM4", 0.142120095111522, -0.0533240139618842, 3.35247519753738, -0.0159058638229611, 0.987309491940711, NA  
"23551", "AL031778.1", 0, NA, NA, NA, NA, NA  
"23552", "TREML1", 0.244351032334407, -0.774664026145693, 3.30062972833046, -0.234701887187309, 0.814440122883676, NA  
"23553", "PGC", 0.11921983002294, -0.0533240139618846, 3.35247519753738, -0.0159058638229612, 0.987309491940711, NA  
"23554", "TTBK1", 0, NA, NA, NA, NA, NA  
"23555", "RUNX2-AS1", 0, NA, NA, NA, NA, NA  
"23556", "AL035670.1", 0.166727055861678, -0.774663427007578, 3.35247519753738, -0.231072082972193, 0.817258802814835, NA

"23557", "GCM1", 0, NA, NA, NA, NA, NA  
"23558", "KLHL31", 0, NA, NA, NA, NA, NA  
"23559", "FKBP1C", 0.0534622507802646, -0.0533240139618838, 3.352475197537  
38, -0.015905863822961, 0.987309491940711, NA  
"23560", "PTP4A1", 0.195582345891787, 0.494635591052761, 3.34300496985029,  
0.147961368742719, 0.882373255878367, NA  
"23561", "SCAT8", 0, NA, NA, NA, NA, NA  
"23562", "F0393414.3", 0, NA, NA, NA, NA, NA  
"23563", "KHDC1L", 0.0644961186387932, -0.0533240139618838, 3.352475197537  
38, -0.015905863822961, 0.987309491940711, NA  
"23564", "O0EP-AS1", 0, NA, NA, NA, NA, NA  
"23565", "AL121972.1", 0.0534622507802646, -0.0533240139618838, 3.35247519  
753738, -0.015905863822961, 0.987309491940711, NA  
"23566", "AL359693.1", 0, NA, NA, NA, NA, NA  
"23567", "LINC01526", 0.32184520322056, -2.1004006767475, 3.00004113479613  
, -0.70012395909706, 0.483849894373614, NA  
"23568", "SNAP91", 0.0534622507802646, -0.0533240139618838, 3.352475197537  
38, -0.015905863822961, 0.987309491940711, NA  
"23569", "CGA", 0, NA, NA, NA, NA, NA  
"23570", "AL096678.1", 0, NA, NA, NA, NA, NA  
"23571", "AL121787.1", 0, NA, NA, NA, NA, NA  
"23572", "AL359987.1", 0.220042982661301, -0.774663427007579, 3.3524751975  
3738, -0.231072082972194, 0.817258802814834, NA  
"23573", "LINC02531", 0.11921983002294, -0.0533240139618846, 3.35247519753  
738, -0.0159058638229612, 0.987309491940711, NA  
"23574", "AL590009.1", 0, NA, NA, NA, NA, NA  
"23575", "AL050331.2", 0.23843966004588, 0.69583062743856, 3.3374714942975  
1, 0.208490358233014, 0.834846110249776, NA  
"23576", "AL450332.1", 0, NA, NA, NA, NA, NA  
"23577", "AL035603.1", 0.345364161606409, 1.425777977878, 2.96866436222982  
, 0.480275909940546, 0.631031216108136, NA  
"23578", "CTAGE9", 1.13696003279944, -0.535397395211239, 1.51187748935885,  
-0.354127499734313, 0.723243333934511, NA  
"23579", "AL449363.2", 0, NA, NA, NA, NA, NA  
"23580", "AL596188.1", 0, NA, NA, NA, NA, NA  
"23581", "AL353596.1", 0.415515844299019, 0.409290761936671, 2.45860832185  
636, 0.166472535823696, 0.867785094815996, NA  
"23582", "AL049552.2", 0, NA, NA, NA, NA, NA  
"23583", "AL356234.3", 0, NA, NA, NA, NA, NA  
"23584", "LINC02539", 0, NA, NA, NA, NA, NA  
"23585", "FILNC1", 0, NA, NA, NA, NA, NA  
"23586", "AL023584.1", 0, NA, NA, NA, NA, NA  
"23587", "AL138916.2", 0, NA, NA, NA, NA, NA  
"23588", "AL031056.2", 0, NA, NA, NA, NA, NA  
"23589", "IYD", 0, NA, NA, NA, NA, NA  
"23590", "SYNE1-  
AS1", 0.128992237277586, 0.513744972953418, 3.34245151459318, 0.1537030442  
20807, 0.877843884367224, NA  
"23591", "AL391863.1", 0.11921983002294, -0.0533240139618846, 3.3524751975  
3738, -0.0159058638229612, 0.987309491940711, NA

"23592", "SYNJ2-IT1", 0, NA, NA, NA, NA, NA  
"23593", "AL360169.3", 0, NA, NA, NA, NA, NA  
"23594", "SLC22A2", 0, NA, NA, NA, NA, NA  
"23595", "AL139393.1", 0.545320289615624, -0.364640110280917, 2.0687511587  
624, -0.176260981769822, 0.86008891410389, NA  
"23596", "AL590302.1", 0.740902635507411, 0.341772949694536, 1.76698359151  
217, 0.193421688427819, 0.84662873123258, NA  
"23597", "AL627443.3", 0.0534622507802646, -0.0533240139618838, 3.35247519  
753738, -0.015905863822961, 0.987309491940711, NA  
"23598", "Z94721.1", 0.307439366388676, -0.151735553622885, 2.669858911634  
2, -0.0568327985279224, 0.954678386705447, NA  
"23599", "AL109910.2", 0, NA, NA, NA, NA, NA  
"23600", "AC093627.22", 0, NA, NA, NA, NA, NA  
"23601", "AC073957.2", 0, NA, NA, NA, NA, NA  
"23602", "AC004906.1", 0, NA, NA, NA, NA, NA  
"23603", "AC093620.1", 0.0534622507802646, -0.0533240139618838, 3.35247519  
753738, -0.015905863822961, 0.987309491940711, NA  
"23604", "RSPH10B", 0, NA, NA, NA, NA, NA  
"23605", "GRID2IP", 0.0644961186387932, -0.0533240139618838, 3.35247519753  
738, -0.015905863822961, 0.987309491940711, NA  
"23606", "AC079742.1", 0.11921983002294, -0.0533240139618846, 3.3524751975  
3738, -0.0159058638229612, 0.987309491940711, NA  
"23607", "AC079804.3", 0.155693188003149, -0.774663427007578, 3.3524751975  
3738, -0.231072082972193, 0.817258802814835, NA  
"23608", "AC006042.2", 0, NA, NA, NA, NA, NA  
"23609", "AC006042.1", 0.102230937222884, -1.35173207482145, 3.35247519753  
738, -0.403204198442509, 0.686798011343181, NA  
"23610", "VWDE", 0, NA, NA, NA, NA, NA  
"23611", "DGKB", 0, NA, NA, NA, NA, NA  
"23612", "AC073333.1", 0, NA, NA, NA, NA, NA  
"23613", "AC019117.2", 0.782889072785895, -1.39504137993581, 1.91053934245  
03, -0.730181969530471, 0.465278962237232, NA  
"23614", "AC010082.1", 0, NA, NA, NA, NA, NA  
"23615", "AC099342.1", 0.11921983002294, -0.0533240139618846, 3.3524751975  
3738, -0.0159058638229612, 0.987309491940711, NA  
"23616", "AC002480.1", 0, NA, NA, NA, NA, NA  
"23617", "AC005682.2", 0, NA, NA, NA, NA, NA  
"23618", "AC003093.1", 0.100823152638361, -1.35173207482145, 3.35247519753  
738, -0.40320419844251, 0.686798011343181, NA  
"23619", "AC010719.1", 0.102230937222884, -1.35173207482145, 3.35247519753  
738, -0.403204198442509, 0.686798011343181, NA  
"23620", "HOTTIP", 0, NA, NA, NA, NA, NA  
"23621", "AC005154.3", 0.273505233441565, -0.226106766776126, 2.7449021822  
0006, -0.082373342205914, 0.934349833830783, NA  
"23622", "CRHR2", 0, NA, NA, NA, NA, NA  
"23623", "ITPRID1", 0, NA, NA, NA, NA, NA  
"23624", "TRGVA", 0, NA, NA, NA, NA, NA  
"23625", "TRGV5P", 0, NA, NA, NA, NA, NA  
"23626", "AC004837.3", 0, NA, NA, NA, NA, NA  
"23627", "AC004837.2", 0, NA, NA, NA, NA, NA

"23628", "AC005537.1", 0.235916738838116, 1.05444670223757, 3.319992403458  
5, 0.3176051551019, 0.750784463269352, NA  
"23629", "AC017116.1", 0.0534622507802646, -0.0533240139618838, 3.35247519  
753738, -0.015905863822961, 0.987309491940711, NA  
"23630", "LINC00525", 0, NA, NA, NA, NA, NA  
"23631", "AC124014.1", 0, NA, NA, NA, NA, NA  
"23632", "DDC", 0.0534622507802646, -0.0533240139618838, 3.35247519753738,  
-0.015905863822961, 0.987309491940711, NA  
"23633", "AC074351.1", 0.401236010115269, 0.640941714329175, 2.44740335264  
861, 0.261886424906438, 0.793409005821607, NA  
"23634", "NUPR2", 0, NA, NA, NA, NA, NA  
"23635", "AC118758.3", 0, NA, NA, NA, NA, NA  
"23636", "AC092634.4", 0, NA, NA, NA, NA, NA  
"23637", "AC092634.8", 0, NA, NA, NA, NA, NA  
"23638", "AC073270.2", 0.764378155808991, 0.399324187587993, 1.72723134952  
316, 0.231193225909335, 0.81716469240724, NA  
"23639", "AC073210.3", 0.102230937222884, -1.35173207482145, 3.35247519753  
738, -0.403204198442509, 0.686798011343181, NA  
"23640", "TRIM74", 0, NA, NA, NA, NA, NA  
"23641", "SPDYE9P", 0, NA, NA, NA, NA, NA  
"23642", "TRIM50", 0.209155438783414, -0.335374473295219, 3.34626863491525  
, -0.10022341595528, 0.920166956363588, NA  
"23643", "AC211433.2", 0.0534622507802646, -0.0533240139618838, 3.35247519  
753738, -0.015905863822961, 0.987309491940711, NA  
"23644", "CCL24", 0, NA, NA, NA, NA, NA  
"23645", "AC004921.2", 0.0644961186387932, -0.0533240139618838, 3.35247519  
753738, -0.015905863822961, 0.987309491940711, NA  
"23646", "PCLO", 0, NA, NA, NA, NA, NA  
"23647", "AC002383.1", 0, NA, NA, NA, NA, NA  
"23648", "STEAP2-  
AS1", 0.11921983002294, -0.0533240139618846, 3.35247519753738, -0.01590586  
38229612, 0.987309491940711, NA  
"23649", "ERVW-1", 0, NA, NA, NA, NA, NA  
"23650", "AC003092.1", 0.388179503600051, -2.37645961319578, 2.86395305033  
592, -0.829783020680815, 0.406661472415033, NA  
"23651", "BHLHA15", 0, NA, NA, NA, NA, NA  
"23652", "CYP3A4", 0.142120095111522, -0.0533240139618842, 3.3524751975373  
8, -0.0159058638229611, 0.987309491940711, NA  
"23653", "OR2AE1", 0, NA, NA, NA, NA, NA  
"23654", "AZGP1", 0, NA, NA, NA, NA, NA  
"23655", "AC092849.1", 0, NA, NA, NA, NA, NA  
"23656", "EPO", 0, NA, NA, NA, NA, NA  
"23657", "AC105052.5", 0.23843966004588, 0.69583062743856, 3.3374714942975  
1, 0.208490358233014, 0.834846110249776, NA  
"23658", "AC106873.1", 0.23843966004588, 0.69583062743856, 3.3374714942975  
1, 0.208490358233014, 0.834846110249776, NA  
"23659", "ST7-  
AS2", 0.23843966004588, 0.69583062743856, 3.33747149429751, 0.208490358233  
014, 0.834846110249776, NA  
"23660", "LINC02476", 0.221450767245824, -0.774663427007578, 3.35247519753

738,-0.231072082972194,0.817258802814834,NA  
"23661","AC015983.2",0,NA,NA,NA,NA,NA  
"23662","AC004594.1",0.562121364514589,0.081317226126609,2.71371839100  
145,0.0299652411968215,0.976094774221357,NA  
"23663","RNF133",0,NA,NA,NA,NA,NA  
"23664","GRM8",0.284240190223044,0.69583062743856,3.33747149429751,0.2  
08490358233014,0.834846110249776,NA  
"23665","AC073934.1",0.449429655913623,-0.941405738513569,2.4171084012  
244,-0.389476011103471,0.696924052905904,NA  
"23666","OPN1SW",0,NA,NA,NA,NA,NA  
"23667","AC009244.2",0,NA,NA,NA,NA,NA  
"23668","SSMEM1",0,NA,NA,NA,NA,NA  
"23669","TSGA13",0.0644961186387932,-0.0533240139618838,3.352475197537  
38,-0.015905863822961,0.987309491940711,NA  
"23670","AKR1D1",0.142120095111522,-0.0533240139618842,3.3524751975373  
8,-0.0159058638229611,0.987309491940711,NA  
"23671","KLRG2",0,NA,NA,NA,NA,NA  
"23672","AC005692.3",0,NA,NA,NA,NA,NA  
"23673","WEE2",0,NA,NA,NA,NA,NA  
"23674","TAS2R3",0,NA,NA,NA,NA,NA  
"23675","MGAM2",0,NA,NA,NA,NA,NA  
"23676","TRBV2",0.0644961186387932,-0.0533240139618838,3.3524751975373  
8,-0.015905863822961,0.987309491940711,NA  
"23677","TRBV6-1",0,NA,NA,NA,NA,NA  
"23678","TRBV6-2",0,NA,NA,NA,NA,NA  
"23679","TRBV7-2",0.0534622507802646,-0.0533240139618838,3.35247519753  
738,-0.015905863822961,0.987309491940711,NA  
"23680","TRBV7-3",0,NA,NA,NA,NA,NA  
"23681","TRBV10-2",0,NA,NA,NA,NA,NA  
"23682","TRBV11-2",0,NA,NA,NA,NA,NA  
"23683","TRBV6-5",0,NA,NA,NA,NA,NA  
"23684","TRBV5-6",0,NA,NA,NA,NA,NA  
"23685","TRBV7-9",0,NA,NA,NA,NA,NA  
"23686","TRBV12-4",0,NA,NA,NA,NA,NA  
"23687","TRBV15",0,NA,NA,NA,NA,NA  
"23688","TRBV19",0,NA,NA,NA,NA,NA  
"23689","TRBV21-1",0,NA,NA,NA,NA,NA  
"23690","TRBV24-1",0,NA,NA,NA,NA,NA  
"23691","TRBV25-1",0,NA,NA,NA,NA,NA  
"23692","TRBVB",0,NA,NA,NA,NA,NA  
"23693","TRBV27",0.0644961186387932,-0.0533240139618838,3.352475197537  
38,-0.015905863822961,0.987309491940711,NA  
"23694","TRBV29-1",0,NA,NA,NA,NA,NA  
"23695","TRBV30",0,NA,NA,NA,NA,NA  
"23696","AC245427.2",0,NA,NA,NA,NA,NA  
"23697","TMEM139",0.4410650332435,-1.51464669453298,2.39690626242459,-  
0.631917367098386,0.5274408743423,NA  
"23698","CTAGE15",0,NA,NA,NA,NA,NA  
"23699","OR2A5",0,NA,NA,NA,NA,NA  
"23700","CTAGE4",0.426230479747991,-0.155329733446175,2.44221910563302

, -0.0636018828482279, 0.94928723248374, NA  
"23701", "AC005586.2", 0, NA, NA, NA, NA, NA  
"23702", "AC010973.2", 0.352281186264108, -0.153285691053076, 2.5634768064  
5525, -0.0597960124574085, 0.952318101493915, NA  
"23703", "AC005998.1", 0, NA, NA, NA, NA, NA  
"23704", "AC099552.1", 0, NA, NA, NA, NA, NA  
"23705", "BLACE", 0, NA, NA, NA, NA, NA  
"23706", "MNX1", 0, NA, NA, NA, NA, NA  
"23707", "MNX1-  
AS2", 0.284240190223044, 0.69583062743856, 3.33747149429751, 0.20849035823  
3014, 0.834846110249776, NA  
"23708", "AC006372.3", 0, NA, NA, NA, NA, NA  
"23709", "AC004908.1", 0.0534622507802646, -0.0533240139618838, 3.35247519  
753738, -0.015905863822961, 0.987309491940711, NA  
"23710", "FAM87A", 0.772726081802975, 0.405646525279647, 1.91767638324531,  
0.211530229408763, 0.832473546181523, NA  
"23711", "AC100810.7", 0, NA, NA, NA, NA, NA  
"23712", "LINC00599", 0, NA, NA, NA, NA, NA  
"23713", "AF131215.7", 0, NA, NA, NA, NA, NA  
"23714", "FAM86B2", 0, NA, NA, NA, NA, NA  
"23715", "AC123777.1", 0, NA, NA, NA, NA, NA  
"23716", "LINC00681", 0, NA, NA, NA, NA, NA  
"23717", "AC027117.2", 0.204461874445769, -1.96013641505178, 3.33548947920  
397, -0.587660799793491, 0.556759992345141, NA  
"23718", "AC087273.2", 0, NA, NA, NA, NA, NA  
"23719", "NAT2", 0.257924125226034, -1.38354199007994, 3.26926698797967, -0  
.423196390862814, 0.672151979809054, NA  
"23720", "AC100849.2", 0, NA, NA, NA, NA, NA  
"23721", "HR", 1.71239560712524, 0.0335047745910434, 1.3332403703034, 0.025  
1303330872128, 0.979951005513169, NA  
"23722", "AC055854.1", 0, NA, NA, NA, NA, NA  
"23723", "AC037441.1", 0.11921983002294, -0.0533240139618846, 3.3524751975  
3738, -0.015905863822961, 0.987309491940711, NA  
"23724", "STC1", 0.102230937222884, -1.35173207482145, 3.35247519753738, -0  
.403204198442509, 0.686798011343181, NA  
"23725", "AC041005.1", 0, NA, NA, NA, NA, NA  
"23726", "AC091185.1", 0, NA, NA, NA, NA, NA  
"23727", "AC021678.2", 0, NA, NA, NA, NA, NA  
"23728", "FBX016", 0, NA, NA, NA, NA, NA  
"23729", "AC108449.1", 0.0644961186387932, -0.0533240139618838, 3.35247519  
753738, -0.015905863822961, 0.987309491940711, NA  
"23730", "AC084262.2", 0, NA, NA, NA, NA, NA  
"23731", "AC084262.1", 0, NA, NA, NA, NA, NA  
"23732", "AC124290.1", 0, NA, NA, NA, NA, NA  
"23733", "AC137579.1", 0, NA, NA, NA, NA, NA  
"23734", "ADRB3", 0, NA, NA, NA, NA, NA  
"23735", "AP006545.3", 0, NA, NA, NA, NA, NA  
"23736", "AC069120.1", 0.348736308861838, 1.27446409017051, 3.014842716234  
17, 0.422729876854882, 0.672492354751249, NA  
"23737", "AC022733.2", 0.312708185939319, 1.32773229177214, 3.079276694218

93,0.431183171770448,0.666335188964777,NA  
"23738","AC009630.3",0.362053593518754,0.143931775625763,2.98640704900  
717,0.0481956321639453,0.96156033117261,NA  
"23739","CHRNA6",0,NA,NA,NA,NA,NA  
"23740","AC026904.1",0,NA,NA,NA,NA,NA  
"23741","AC064807.2",0.543039947662943,-1.10038506805856,1.86550211148  
443,-0.589859996021637,0.555284515746412,NA  
"23742","AC100821.2",0.100823152638361,-1.35173207482145,3.35247519753  
738,-0.40320419844251,0.686798011343181,NA  
"23743","AC012103.1",0.128992237277586,0.513744972953418,3.34245151459  
318,0.153703044220807,0.877843884367224,NA  
"23744","AC079089.1",0.106924501560529,0.385965786494404,3.34626872025  
989,0.115342137395477,0.908173940404949,NA  
"23745","AC022730.4",1.21685663864972,1.10644192551342,1.9088891054651  
9,0.579626088464573,0.562166796076071,NA  
"23746","AC027018.1",0.23843966004588,0.69583062743856,3.3374714942975  
1,0.208490358233014,0.834846110249776,NA  
"23747","CASC9",0.11921983002294,-0.0533240139618846,3.35247519753738,  
-0.0159058638229612,0.987309491940711,NA  
"23748","AC067773.1",0.43470766151789,-1.96598799244893,2.386850113177  
03,-0.823674675504485,0.410124432568767,NA  
"23749","AC034114.2",0,NA,NA,NA,NA,NA  
"23750","AC079209.2",0,NA,NA,NA,NA,NA  
"23751","AC009902.2",0.0534622507802646,-0.0533240139618838,3.35247519  
753738,-0.015905863822961,0.987309491940711,NA  
"23752","AC011773.1",0,NA,NA,NA,NA,NA  
"23753","CA1",0.102230937222884,-1.35173207482145,3.35247519753738,-0.  
403204198442509,0.686798011343181,NA  
"23754","AF121898.1",0,NA,NA,NA,NA,NA  
"23755","ESRP1",0,NA,NA,NA,NA,NA  
"23756","AC068189.2",0.0534622507802646,-0.0533240139618838,3.35247519  
753738,-0.015905863822961,0.987309491940711,NA  
"23757","MIR3150BHG",0,NA,NA,NA,NA,NA  
"23758","AC068189.1",0,NA,NA,NA,NA,NA  
"23759","AP003117.2",0.11921983002294,-0.0533240139618846,3.3524751975  
3738,-0.0159058638229612,0.987309491940711,NA  
"23760","AP000426.1",0.11921983002294,-0.0533240139618846,3.3524751975  
3738,-0.0159058638229612,0.987309491940711,NA  
"23761","AC012213.1",0,NA,NA,NA,NA,NA  
"23762","LINC02237",0,NA,NA,NA,NA,NA  
"23763","AP005717.2",0.345174184972767,-1.38629500102082,2.56076240199  
981,-0.541360260498282,0.588259292553927,NA  
"23764","AC108136.1",0.287785067625315,-0.774666036310719,3.1203959310  
9626,-0.248258891953677,0.803934102976972,NA  
"23765","AC104316.1",0.171420620199322,0.765902268429694,3.33569101336  
987,0.22960827767316,0.818396174063793,NA  
"23766","AC009908.1",0,NA,NA,NA,NA,NA  
"23767","AC084116.1",0,NA,NA,NA,NA,NA  
"23768","AC084116.3",0,NA,NA,NA,NA,NA  
"23769","CCAT2",0,NA,NA,NA,NA,NA

"23770", "AC103833.2", 0.100823152638361, -1.35173207482145, 3.35247519753738, -0.40320419844251, 0.686798011343181, NA  
"23771", "ZFAT-AS1", 0, NA, NA, NA, NA, NA  
"23772", "AC087045.2", 0, NA, NA, NA, NA, NA  
"23773", "AC079015.1", 0, NA, NA, NA, NA, NA  
"23774", "COL22A1", 0, NA, NA, NA, NA, NA  
"23775", "AC011676.1", 0, NA, NA, NA, NA, NA  
"23776", "AC100803.3", 0, NA, NA, NA, NA, NA  
"23777", "AC134682.1", 0.168565237602375, -1.35173207482145, 3.35247519753738, -0.40320419844251, 0.686798011343181, NA  
"23778", "AC067930.1", 0, NA, NA, NA, NA, NA  
"23779", "SPATC1", 0, NA, NA, NA, NA, NA  
"23780", "FAM138C", 0.11921983002294, -0.0533240139618846, 3.35247519753738, -0.0159058638229612, 0.987309491940711, NA  
"23781", "LINC01388", 0, NA, NA, NA, NA, NA  
"23782", "AL158832.1", 0, NA, NA, NA, NA, NA  
"23783", "AL354977.1", 0, NA, NA, NA, NA, NA  
"23784", "AL162411.1", 0, NA, NA, NA, NA, NA  
"23785", "AL513412.1", 0, NA, NA, NA, NA, NA  
"23786", "AL449983.1", 0, NA, NA, NA, NA, NA  
"23787", "MIR31HG", 0.604938915830164, -3.23586097412604, 2.92356653124886, -1.10681968053033, 0.268371897544613, NA  
"23788", "IFT74-AS1", 0.154285403418625, -0.774663427007578, 3.35247519753738, -0.231072082972193, 0.817258802814835, NA  
"23789", "AL451123.2", 0.183715948661733, 0.576034712544328, 3.34068880739852, 0.172429922616139, 0.863099549623161, NA  
"23790", "IFNK", 0, NA, NA, NA, NA, NA  
"23791", "AL157884.2", 0, NA, NA, NA, NA, NA  
"23792", "PRSS3", 0.0534622507802646, -0.0533240139618838, 3.35247519753738, -0.015905863822961, 0.987309491940711, NA  
"23793", "AL354989.1", 0, NA, NA, NA, NA, NA  
"23794", "AL512604.3", 0.628213085638996, 1.04072899300496, 1.94114095998752, 0.53614292545331, 0.591859775350566, NA  
"23795", "ANKRD20A2", 0, NA, NA, NA, NA, NA  
"23796", "FP325318.1", 0, NA, NA, NA, NA, NA  
"23797", "AL353626.1", 0.267311253901323, 1.19374829682344, 3.32328205001156, 0.359207638370414, 0.719439762854985, NA  
"23798", "BX255923.1", 1.11183938223652, -0.179506124095508, 1.54344637223938, -0.116302145201885, 0.907413085526363, NA  
"23799", "AL391987.4", 0.193488355916379, 0.860398995964988, 3.33340328940337, 0.258114281791264, 0.796318709677277, NA  
"23800", "AL512625.2", 0, NA, NA, NA, NA, NA  
"23801", "AL136317.2", 0.11921983002294, -0.0533240139618846, 3.35247519753738, -0.0159058638229612, 0.987309491940711, NA  
"23802", "RORB-AS1", 0, NA, NA, NA, NA, NA  
"23803", "VPS13A-AS1", 0, NA, NA, NA, NA, NA  
"23804", "RASEF", 0, NA, NA, NA, NA, NA  
"23805", "AL137847.1", 0, NA, NA, NA, NA, NA  
"23806", "BX470209.1", 0.721487076774032, -1.35907223634936, 1.71254991699



457,-0.793595691934314,0.427430841251324,NA  
"23807","AL451065.1",0.242943247749883,-0.774663951729422,3.3071134315  
1841,-0.234241724020258,0.814797324817481,NA  
"23808","AL353768.2",0.165319271277154,-0.774663427007578,3.3524751975  
3738,-0.231072082972193,0.817258802814835,NA  
"23809","AL161729.2",0,NA,NA,NA,NA,NA  
"23810","AL354861.3",0,NA,NA,NA,NA,NA  
"23811","AL449403.1",0.182454488057851,0.814003878402388,3.33451052748  
657,0.244114952312343,0.80714179253596,NA  
"23812","HSD17B3",0.323681704468709,-1.38551320655902,3.03285912081125  
, -0.456834014165622,0.647790355428191,NA  
"23813","AL160269.1",0,NA,NA,NA,NA,NA  
"23814","AL162385.2",0,NA,NA,NA,NA,NA  
"23815","PTCSC2",0,NA,NA,NA,NA,NA  
"23816","BAAT",0,NA,NA,NA,NA,NA  
"23817","PPP3R2",0.11921983002294,-0.0533240139618846,3.35247519753738  
, -0.0159058638229612,0.987309491940711,NA  
"23818","AL591506.1",0.11921983002294,-0.0533240139618846,3.3524751975  
3738,-0.0159058638229612,0.987309491940711,NA  
"23819","LINC01509",0.441640073887767,-0.39274807050378,2.166478420848  
38,-0.181284090681126,0.85614459293051,NA  
"23820","AL162414.1",0,NA,NA,NA,NA,NA  
"23821","AL390067.1",0.310685332713897,-0.774666839538346,3.0453962482  
8073,-0.254373085267864,0.799207342088715,NA  
"23822","AL162425.1",0,NA,NA,NA,NA,NA  
"23823","TTLL11-  
IT1",0.168565237602375,-1.35173207482145,3.35247519753738,-0.403204198  
44251,0.686798011343181,NA  
"23824","AC007066.3",0,NA,NA,NA,NA,NA  
"23825","AL445489.1",0,NA,NA,NA,NA,NA  
"23826","LHX2",0.249044596672051,0.88628321168114,3.27462607355989,0.2  
70651729929472,0.786658905412859,NA  
"23827","AL590708.1",0.166727055861678,-0.774663427007578,3.3524751975  
3738,-0.231072082972193,0.817258802814835,NA  
"23828","AL356481.3",0.11921983002294,-0.0533240139618846,3.3524751975  
3738,-0.0159058638229612,0.987309491940711,NA  
"23829","AL353803.1",0,NA,NA,NA,NA,NA  
"23830","PRDM12",0.154285403418625,-0.774663427007578,3.35247519753738  
, -0.231072082972193,0.817258802814835,NA  
"23831","GFI1B",0,NA,NA,NA,NA,NA  
"23832","FCN2",0,NA,NA,NA,NA,NA  
"23833","LHX3",0,NA,NA,NA,NA,NA  
"23834","CCDC187",0.11921983002294,-0.0533240139618846,3.3524751975373  
8,-0.0159058638229612,0.987309491940711,NA  
"23835","GRIN1",0.100823152638361,-1.35173207482145,3.35247519753738,-  
0.40320419844251,0.686798011343181,NA  
"23836","FAM166A",0.22202748838264,-0.774663427007578,3.35247519753738  
, -0.231072082972193,0.817258802814835,NA  
"23837","AL450322.1",0,NA,NA,NA,NA,NA  
"23838","LINC02642",0,NA,NA,NA,NA,NA

"23839", "CELF2-  
DT", 0.100823152638361, -1.35173207482145, 3.35247519753738, -0.4032041984  
4251, 0.686798011343181, NA  
"23840", "AL136320.1", 0, NA, NA, NA, NA, NA  
"23841", "AL158168.1", 0, NA, NA, NA, NA, NA  
"23842", "AC069542.1", 0, NA, NA, NA, NA, NA  
"23843", "SLC39A12-AS1", 0, NA, NA, NA, NA, NA  
"23844", "AL158211.2", 0, NA, NA, NA, NA, NA  
"23845", "SPAG6", 0, NA, NA, NA, NA, NA  
"23846", "ARMC3", 0, NA, NA, NA, NA, NA  
"23847", "AL512603.1", 0, NA, NA, NA, NA, NA  
"23848", "LINC01516", 0.0534622507802646, -0.0533240139618838, 3.352475197  
53738, -0.015905863822961, 0.987309491940711, NA  
"23849", "AL590068.3", 0, NA, NA, NA, NA, NA  
"23850", "AL121748.1", 0.284240190223044, 0.69583062743856, 3.337471494297  
51, 0.208490358233014, 0.834846110249776, NA  
"23851", "AL450313.1", 0, NA, NA, NA, NA, NA  
"23852", "LINC00838", 0, NA, NA, NA, NA, NA  
"23853", "LINC02634", 0.314802175914727, 1.16511964632437, 2.6519779114781  
, 0.439339875826864, 0.660415284707152, NA  
"23854", "GJD4", 0.201646305276721, -1.9490730241217, 3.3359781915796, -0.5  
84258323103367, 0.559046527482917, NA  
"23855", "AL133216.1", 0, NA, NA, NA, NA, NA  
"23856", "TMEM72", 0, NA, NA, NA, NA, NA  
"23857", "F0681492.1", 0, NA, NA, NA, NA, NA  
"23858", "AC068898.2", 0, NA, NA, NA, NA, NA  
"23859", "AC069547.2", 0.388608220263676, -1.50962735921242, 2.47349094131  
884, -0.610322574461302, 0.541648145797489, NA  
"23860", "AL592430.1", 0, NA, NA, NA, NA, NA  
"23861", "AL451049.1", 0.20774765419889, -0.335374473295219, 3.34626863491  
525, -0.10022341595528, 0.920166956363588, NA  
"23862", "CTNNA3", 0, NA, NA, NA, NA, NA  
"23863", "NEUROG3", 0, NA, NA, NA, NA, NA  
"23864", "ZNF503-  
AS1", 0.0534622507802646, -0.0533240139618838, 3.35247519753738, -0.015905  
863822961, 0.987309491940711, NA  
"23865", "AC010997.3", 0, NA, NA, NA, NA, NA  
"23866", "KCNMA1-  
AS1", 0.11921983002294, -0.0533240139618846, 3.35247519753738, -0.01590586  
38229612, 0.987309491940711, NA  
"23867", "AL844892.2", 0.0644961186387932, -0.0533240139618838, 3.35247519  
753738, -0.015905863822961, 0.987309491940711, NA  
"23868", "AL138759.1", 0, NA, NA, NA, NA, NA  
"23869", "AL157834.1", 1.44898806189491, 0.16221396404455, 1.2750553013661  
7, 0.127221120425714, 0.898765389521231, NA  
"23870", "NKX2-3", 0, NA, NA, NA, NA, NA  
"23871", "AL138921.1", 0.0534622507802646, -0.0533240139618838, 3.35247519  
753738, -0.015905863822961, 0.987309491940711, NA  
"23872", "AC010789.2", 0, NA, NA, NA, NA, NA  
"23873", "CYP17A1", 0, NA, NA, NA, NA, NA

"23874", "AL358790.1", 0.0534622507802646, -0.0533240139618838, 3.35247519  
753738, -0.015905863822961, 0.987309491940711, NA  
"23875", "CALHM1", 0, NA, NA, NA, NA, NA  
"23876", "RBM20", 0, NA, NA, NA, NA, NA  
"23877", "AL136368.1", 0.0644961186387932, -0.0533240139618838, 3.35247519  
753738, -0.015905863822961, 0.987309491940711, NA  
"23878", "PLEKHS1", 0, NA, NA, NA, NA, NA  
"23879", "AC005871.2", 0.270796174825259, -2.10201442494854, 3.17084321545  
501, -0.662919697417743, 0.507381985665671, NA  
"23880", "GPR26", 0, NA, NA, NA, NA, NA  
"23881", "AL513190.1", 0, NA, NA, NA, NA, NA  
"23882", "AL731577.2", 0.49440128137563, 0.471668930345083, 2.143830533426  
63, 0.220012227175057, 0.825861632100525, NA  
"23883", "FOXI2", 0, NA, NA, NA, NA, NA  
"23884", "AL391869.1", 0.11921983002294, -0.0533240139618846, 3.3524751975  
3738, -0.0159058638229612, 0.987309491940711, NA  
"23885", "AL157832.2", 0, NA, NA, NA, NA, NA  
"23886", "AL157832.1", 0, NA, NA, NA, NA, NA  
"23887", "AC136475.2", 0.270796174825259, -2.10201442494854, 3.17084321545  
501, -0.662919697417743, 0.507381985665671, NA  
"23888", "CEND1", 0, NA, NA, NA, NA, NA  
"23889", "AP006621.1", 0, NA, NA, NA, NA, NA  
"23890", "LINC02688", 0.203054089861245, -1.95461545718866, 3.335732964236  
96, -0.585962808817275, 0.557900507779092, NA  
"23891", "TRPM5", 0, NA, NA, NA, NA, NA  
"23892", "CARS-AS1", 0, NA, NA, NA, NA, NA  
"23893", "AC090587.2", 0.117958369419058, 0.451348601316665, 3.34428110054  
629, 0.134961322851401, 0.892642454377335, NA  
"23894", "OR52K2", 0, NA, NA, NA, NA, NA  
"23895", "OR51E2", 0, NA, NA, NA, NA, NA  
"23896", "HBD", 0, NA, NA, NA, NA, NA  
"23897", "HBG1", 0, NA, NA, NA, NA, NA  
"23898", "OR51M1", 0.11921983002294, -0.0533240139618846, 3.35247519753738  
, -0.0159058638229612, 0.987309491940711, NA  
"23899", "OR51I1", 0, NA, NA, NA, NA, NA  
"23900", "OR56A1", 0, NA, NA, NA, NA, NA  
"23901", "CNGA4", 0, NA, NA, NA, NA, NA  
"23902", "OR6A2", 0, NA, NA, NA, NA, NA  
"23903", "OR10A2", 0, NA, NA, NA, NA, NA  
"23904", "NLRP14", 0.142120095111522, -0.0533240139618842, 3.3524751975373  
8, -0.0159058638229611, 0.987309491940711, NA  
"23905", "RBMXL2", 0, NA, NA, NA, NA, NA  
"23906", "KC877392.1", 0, NA, NA, NA, NA, NA  
"23907", "AC104383.2", 0, NA, NA, NA, NA, NA  
"23908", "AC079329.1", 0, NA, NA, NA, NA, NA  
"23909", "AC025300.1", 0, NA, NA, NA, NA, NA  
"23910", "AC013549.1", 0, NA, NA, NA, NA, NA  
"23911", "AC124798.2", 0.338834096020616, -0.774667674034573, 2.9654685095  
3071, -0.261229438635032, 0.793915577320881, NA  
"23912", "SAA4", 0, NA, NA, NA, NA, NA

"23913", "LDHC", 1.08677975883386, -1.81140546248381, 1.62053753192475, -1.11778062945099, 0.26366069649459, NA  
"23914", "AC103974.1", 0, NA, NA, NA, NA, NA  
"23915", "AC021698.1", 0.11921983002294, -0.0533240139618846, 3.35247519753738, -0.0159058638229612, 0.987309491940711, NA  
"23916", "BBOX1", 0, NA, NA, NA, NA, NA  
"23917", "AL049629.1", 0.338001352080358, 0.229891577348227, 2.29526221564887, 0.100159178232817, 0.920217954042218, NA  
"23918", "LINC02721", 0.0534622507802646, -0.0533240139618838, 3.35247519753738, -0.015905863822961, 0.987309491940711, NA  
"23919", "AC021723.2", 1.22610676484139, 0.383012320138473, 1.37393742959238, 0.278769841980434, 0.780421459924251, NA  
"23920", "AC044839.1", 0, NA, NA, NA, NA, NA  
"23921", "AC068385.1", 0.320866135299661, -1.37464340165215, 3.04127275254598, -0.451996092919114, 0.651271797119151, NA  
"23922", "C11orf94", 0.0534622507802646, -0.0533240139618838, 3.35247519753738, -0.015905863822961, 0.987309491940711, NA  
"23923", "LINC02489", 0, NA, NA, NA, NA, NA  
"23924", "AC090589.2", 0.439657248658977, -1.50832565035379, 2.39823821350385, -0.628930704990358, 0.529394423116454, NA  
"23925", "LRRC55", 0, NA, NA, NA, NA, NA  
"23926", "GLYATL1", 0.338834096020616, -0.774667674034573, 2.96546850953071, -0.261229438635032, 0.793915577320881, NA  
"23927", "OR5AN1", 0, NA, NA, NA, NA, NA  
"23928", "TCN1", 0, NA, NA, NA, NA, NA  
"23929", "MS4A3", 0, NA, NA, NA, NA, NA  
"23930", "LINC02705", 0.100823152638361, -1.35173207482145, 3.35247519753738, -0.40320419844251, 0.686798011343181, NA  
"23931", "PGA4", 0.226144331583469, 0.885845475851209, 3.33280882803988, 0.265795466094045, 0.790396735192843, NA  
"23932", "MYRF-AS1", 0, NA, NA, NA, NA, NA  
"23933", "LINC02733", 0, NA, NA, NA, NA, NA  
"23934", "TEX54", 0, NA, NA, NA, NA, NA  
"23935", "AP000944.6", 0, NA, NA, NA, NA, NA  
"23936", "AP006287.2", 0.841109253581056, -1.25481526976326, 1.73107719976206, -0.724875395468057, 0.468528476554022, NA  
"23937", "SYT12", 0.226144331583469, 0.885845475851209, 3.33280882803988, 0.265795466094045, 0.790396735192843, NA  
"23938", "C11orf72", 0.142120095111522, -0.0533240139618842, 3.35247519753738, -0.0159058638229611, 0.987309491940711, NA  
"23939", "AP003071.1", 0, NA, NA, NA, NA, NA  
"23940", "AP000439.1", 0.80400982497037, 1.75801828653982, 1.76453216451488, 0.996308439083139, 0.319100304680307, NA  
"23941", "LINC02584", 0.540480401297337, -2.03594877027212, 2.25723965615147, -0.901963938443005, 0.367076024392447, NA  
"23942", "AP000812.1", 0, NA, NA, NA, NA, NA  
"23943", "AP002761.2", 0, NA, NA, NA, NA, NA  
"23944", "AP002761.1", 0, NA, NA, NA, NA, NA  
"23945", "AP002761.4", 0, NA, NA, NA, NA, NA  
"23946", "AP003717.1", 0, NA, NA, NA, NA, NA

"23947", "AP000785.1", 0.284240190223044, 0.69583062743856, 3.337471494297  
51, 0.208490358233014, 0.834846110249776, NA  
"23948", "LINC02761", 0.269388390240736, -2.09481427187859, 3.175488483696  
32, -0.659682528415343, 0.509457580965155, NA  
"23949", "AP003032.1", 0, NA, NA, NA, NA, NA  
"23950", "DISC1FP1", 0, NA, NA, NA, NA, NA  
"23951", "AP002961.1", 0, NA, NA, NA, NA, NA  
"23952", "CARD17", 0, NA, NA, NA, NA, NA  
"23953", "GRIA4", 0.274913018026089, -0.226100793799534, 2.74072232109206,  
-0.0824967900102491, 0.934251670836265, NA  
"23954", "AP000813.1", 0, NA, NA, NA, NA, NA  
"23955", "AP001001.1", 0, NA, NA, NA, NA, NA  
"23956", "C11orf87", 0.11921983002294, -0.0533240139618846, 3.352475197537  
38, -0.0159058638229612, 0.987309491940711, NA  
"23957", "LINC02732", 0, NA, NA, NA, NA, NA  
"23958", "AP002008.3", 0, NA, NA, NA, NA, NA  
"23959", "AP002008.1", 0, NA, NA, NA, NA, NA  
"23960", "NCAM1-  
AS1", 0.168565237602375, -1.35173207482145, 3.35247519753738, -0.403204198  
44251, 0.686798011343181, NA  
"23961", "DRD2", 0, NA, NA, NA, NA, NA  
"23962", "AP003170.4", 0, NA, NA, NA, NA, NA  
"23963", "HTR3B", 0, NA, NA, NA, NA, NA  
"23964", "HTR3A", 0.102230937222884, -1.35173207482145, 3.35247519753738, -  
0.403204198442509, 0.686798011343181, NA  
"23965", "NXPE4", 1.00079273232624, -1.30402916615262, 1.79161651867067, -0  
.727850604503342, 0.466705043222749, NA  
"23966", "AP000462.1", 0, NA, NA, NA, NA, NA  
"23967", "AP000936.1", 0.0644961186387932, -0.0533240139618838, 3.35247519  
753738, -0.015905863822961, 0.987309491940711, NA  
"23968", "AP000757.1", 0, NA, NA, NA, NA, NA  
"23969", "AP000679.1", 0.166727055861678, -0.774663427007578, 3.3524751975  
3738, -0.231072082972193, 0.817258802814835, NA  
"23970", "AP004147.1", 0, NA, NA, NA, NA, NA  
"23971", "AP002762.2", 0, NA, NA, NA, NA, NA  
"23972", "AP000866.5", 0, NA, NA, NA, NA, NA  
"23973", "BARX2", 0, NA, NA, NA, NA, NA  
"23974", "AP000844.2", 0.23843966004588, 0.69583062743856, 3.3374714942975  
1, 0.208490358233014, 0.834846110249776, NA  
"23975", "LINC02714", 0.401626593843543, -1.78854660235446, 2.869820671533  
9, -0.623225910975998, 0.533136076801558, NA  
"23976", "AC026369.2", 0, NA, NA, NA, NA, NA  
"23977", "AC007406.3", 0, NA, NA, NA, NA, NA  
"23978", "SLC6A13", 0.0534622507802646, -0.0533240139618838, 3.35247519753  
738, -0.015905863822961, 0.987309491940711, NA  
"23979", "AC005912.2", 0, NA, NA, NA, NA, NA  
"23980", "AC006064.1", 0, NA, NA, NA, NA, NA  
"23981", "PIANP", 0, NA, NA, NA, NA, NA  
"23982", "AC092745.5", 0.42806698099614, 0.480112305801356, 2.216646682388  
09, 0.216593970349893, 0.828524785164299, NA

"23983", "CLEC6A", 0, NA, NA, NA, NA, NA  
"23984", "A2ML1", 0.229815389915947, -0.207595008908767, 3.34245142718562, -0.0621086090347659, 0.950476341218052, NA  
"23985", "LINC02390", 0, NA, NA, NA, NA, NA  
"23986", "AC244131.2", 0.11921983002294, -0.0533240139618846, 3.35247519753738, -0.0159058638229612, 0.987309491940711, NA  
"23987", "GPRC5D", 0, NA, NA, NA, NA, NA  
"23988", "AC023790.2", 0, NA, NA, NA, NA, NA  
"23989", "AC092112.1", 0, NA, NA, NA, NA, NA  
"23990", "GUCY2C", 0.168565237602375, -1.35173207482145, 3.35247519753738, -0.40320419844251, 0.686798011343181, NA  
"23991", "AC010168.1", 0.172682080803205, 0.494635591052761, 3.34300496985029, 0.147961368742719, 0.882373255878367, NA  
"23992", "PDE6H", 0, NA, NA, NA, NA, NA  
"23993", "AC007528.1", 0.566515467964523, -1.04075142429538, 2.30151542170694, -0.452202672412898, 0.651122983147104, NA  
"23994", "GYS2", 0.142120095111522, -0.0533240139618842, 3.35247519753738, -0.0159058638229611, 0.987309491940711, NA  
"23995", "AC053513.1", 0.0644961186387932, -0.0533240139618838, 3.35247519753738, -0.015905863822961, 0.987309491940711, NA  
"23996", "AC084816.1", 0.219614265997676, -1.35173207482145, 3.35247519753738, -0.40320419844251, 0.686798011343181, NA  
"23997", "AC022509.2", 0.100823152638361, -1.35173207482145, 3.35247519753738, -0.40320419844251, 0.686798011343181, NA  
"23998", "AC024145.1", 0, NA, NA, NA, NA, NA  
"23999", "AC009511.1", 0, NA, NA, NA, NA, NA  
"24000", "AC087588.3", 0.165319271277154, -0.774663427007578, 3.35247519753738, -0.231072082972193, 0.817258802814835, NA  
"24001", "AC046130.1", 0.11921983002294, -0.0533240139618846, 3.35247519753738, -0.0159058638229612, 0.987309491940711, NA  
"24002", "AC140847.2", 0, NA, NA, NA, NA, NA  
"24003", "AC025253.2", 0, NA, NA, NA, NA, NA  
"24004", "AC004466.2", 0.0534622507802646, -0.0533240139618838, 3.35247519753738, -0.015905863822961, 0.987309491940711, NA  
"24005", "AC121338.2", 0, NA, NA, NA, NA, NA  
"24006", "ADCY6-  
DT", 1.12172316880651, -1.36799008441949, 1.75709211892049, -0.778553423402727, 0.436242824961282, NA  
"24007", "AC125611.3", 0, NA, NA, NA, NA, NA  
"24008", "PRPH", 0.0644961186387932, -0.0533240139618838, 3.35247519753738, -0.015905863822961, 0.987309491940711, NA  
"24009", "FAM186A", 0, NA, NA, NA, NA, NA  
"24010", "SP7", 0.100823152638361, -1.35173207482145, 3.35247519753738, -0.40320419844251, 0.686798011343181, NA  
"24011", "HOXC13", 0.0644961186387932, -0.0533240139618838, 3.35247519753738, -0.015905863822961, 0.987309491940711, NA  
"24012", "FAM242C", 0.648833008774897, 0.155863443074707, 1.7814936697449, 0.0874903154143826, 0.930281783093103, NA  
"24013", "AC079313.2", 0.102230937222884, -1.35173207482145, 3.35247519753738, -0.403204198442509, 0.686798011343181, NA

"24014", "AC079313.1", 0, NA, NA, NA, NA, NA  
"24015", "AC068789.1", 0, NA, NA, NA, NA, NA  
"24016", "AC025162.2", 0.117958369419058, 0.451348601316665, 3.34428110054  
629, 0.134961322851401, 0.892642454377335, NA  
"24017", "AC034102.3", 0, NA, NA, NA, NA, NA  
"24018", "AC034102.5", 0, NA, NA, NA, NA, NA  
"24019", "AC024884.2", 0, NA, NA, NA, NA, NA  
"24020", "MIP", 0.166727055861678, -0.774663427007578, 3.35247519753738, -0  
.231072082972193, 0.817258802814835, NA  
"24021", "MY01A", 0, NA, NA, NA, NA, NA  
"24022", "AC025419.1", 0, NA, NA, NA, NA, NA  
"24023", "LINC02408", 0, NA, NA, NA, NA, NA  
"24024", "LINC02821", 0.183715948661733, 0.576034712544328, 3.340688807398  
52, 0.172429922616139, 0.863099549623161, NA  
"24025", "AC083809.1", 0, NA, NA, NA, NA, NA  
"24026", "PTPRR", 0, NA, NA, NA, NA, NA  
"24027", "AC025575.2", 0, NA, NA, NA, NA, NA  
"24028", "AC073525.1", 0, NA, NA, NA, NA, NA  
"24029", "LNC0G", 0.402068754055527, 0.111768098492992, 2.48272794359476, 0  
.0450182625854534, 0.964092752272842, NA  
"24030", "AC069228.1", 0, NA, NA, NA, NA, NA  
"24031", "LINC02426", 0, NA, NA, NA, NA, NA  
"24032", "AC091214.1", 0, NA, NA, NA, NA, NA  
"24033", "LINC02258", 0, NA, NA, NA, NA, NA  
"24034", "LINC02458", 0.219614265997676, -1.35173207482145, 3.352475197537  
38, -0.40320419844251, 0.686798011343181, NA  
"24035", "LINC02399", 0, NA, NA, NA, NA, NA  
"24036", "AC126175.2", 0, NA, NA, NA, NA, NA  
"24037", "LINC02404", 0, NA, NA, NA, NA, NA  
"24038", "AC073655.1", 0.221450767245824, -0.774663427007578, 3.3524751975  
3738, -0.231072082972194, 0.817258802814834, NA  
"24039", "CCDC38", 0.219614265997676, -1.35173207482145, 3.35247519753738,  
-0.40320419844251, 0.686798011343181, NA  
"24040", "AC007298.2", 0.142120095111522, -0.0533240139618842, 3.352475197  
53738, -0.0159058638229611, 0.987309491940711, NA  
"24041", "LINC02452", 0.219614265997676, -1.35173207482145, 3.352475197537  
38, -0.40320419844251, 0.686798011343181, NA  
"24042", "AC008149.1", 0.363570862357347, -0.0560033712720379, 2.588782893  
56983, -0.0216330892061835, 0.982740638333437, NA  
"24043", "SPIC", 0, NA, NA, NA, NA, NA  
"24044", "AC079907.2", 0, NA, NA, NA, NA, NA  
"24045", "LINC02401", 0.168565237602375, -1.35173207482145, 3.352475197537  
38, -0.40320419844251, 0.686798011343181, NA  
"24046", "AC012555.2", 0, NA, NA, NA, NA, NA  
"24047", "AC011313.1", 0, NA, NA, NA, NA, NA  
"24048", "AC011595.1", 0.0644961186387932, -0.0533240139618838, 3.35247519  
753738, -0.015905863822961, 0.987309491940711, NA  
"24049", "ASCL4", 0.242943247749883, -0.774663951729422, 3.30711343151841,  
-0.234241724020258, 0.814797324817481, NA  
"24050", "ATXN2-

AS",0.128992237277586,0.513744972953418,3.34245151459318,0.15370304422  
0807,0.877843884367224,NA  
"24051","AC073575.1",0,NA,NA,NA,NA,NA  
"24052","AC004217.1",0,NA,NA,NA,NA,NA  
"24053","RASAL1",0.32184520322056,-2.1004006767475,3.00004113479613,-0  
.70012395909706,0.483849894373614,NA  
"24054","CFAP73",0.333454111723355,-0.818112419595889,3.04298770566036  
, -0.268851700607955,0.788043806171596,NA  
"24055","AC078880.3",0,NA,NA,NA,NA,NA  
"24056","AC012157.2",0.323681704468709,-1.38551320655902,3.03285912081  
125,-0.456834014165622,0.647790355428191,NA  
"24057","AC125603.3",0,NA,NA,NA,NA,NA  
"24058","HRK",1.94059247253717,-4.85481859453899,3.21837671704273,-1.5  
0846809474807,0.131434766456401,NA  
"24059","NOS1",0.11921983002294,-0.0533240139618846,3.35247519753738,-  
0.0159058638229612,0.987309491940711,NA  
"24060","AC131159.1",0,NA,NA,NA,NA,NA  
"24061","AC004263.1",0.11921983002294,-0.0533240139618846,3.3524751975  
3738,-0.0159058638229612,0.987309491940711,NA  
"24062","AC063943.1",0.172682080803205,0.494635591052761,3.34300496985  
029,0.147961368742719,0.882373255878367,NA  
"24063","HNF1A",0,NA,NA,NA,NA,NA  
"24064","AC084018.4",0,NA,NA,NA,NA,NA  
"24065","AC073593.2",0.100823152638361,-1.35173207482145,3.35247519753  
738,-0.40320419844251,0.686798011343181,NA  
"24066","AC140121.1",0,NA,NA,NA,NA,NA  
"24067","AC108704.1",0,NA,NA,NA,NA,NA  
"24068","AC073912.1",0.363570862357347,-0.0560033712720379,2.588782893  
56983,-0.0216330892061835,0.982740638333437,NA  
"24069","AC073912.2",0.172682080803205,0.494635591052761,3.34300496985  
029,0.147961368742719,0.882373255878367,NA  
"24070","AC137590.1",0.11921983002294,-0.0533240139618846,3.3524751975  
3738,-0.0159058638229612,0.987309491940711,NA  
"24071","GALNT9",0,NA,NA,NA,NA,NA  
"24072","LRCOL1",0,NA,NA,NA,NA,NA  
"24073","AC026786.2",0,NA,NA,NA,NA,NA  
"24074","AL355001.1",0.142120095111522,-0.0533240139618842,3.352475197  
53738,-0.0159058638229611,0.987309491940711,NA  
"24075","GJA3",0,NA,NA,NA,NA,NA  
"24076","RNF17",0.615643964623993,2.25916505653675,2.54040895568878,0.  
889291880143063,0.373846234241457,NA  
"24077","GPR12",0.284240190223044,0.69583062743856,3.33747149429751,0.  
208490358233014,0.834846110249776,NA  
"24078","LINC00412",0,NA,NA,NA,NA,NA  
"24079","LINC00543",0,NA,NA,NA,NA,NA  
"24080","LINC00427",0,NA,NA,NA,NA,NA  
"24081","ZAR1L",0,NA,NA,NA,NA,NA  
"24082","TRPC4",0,NA,NA,NA,NA,NA  
"24083","VWA8-  
AS1",0.142120095111522,-0.0533240139618842,3.35247519753738,-0.0159058



638229611,0.987309491940711,NA  
"24084","FAM216B",0.219614265997676,-1.35173207482145,3.35247519753738  
,-0.40320419844251,0.686798011343181,NA  
"24085","LINC01050",1.09807132998838,-3.98431128188781,2.5459092913250  
5,-1.56498556152962,0.117586294817065,NA  
"24086","ENOX1-AS1",0,NA,NA,NA,NA,NA  
"24087","AL162713.1",0.100823152638361,-1.35173207482145,3.35247519753  
738,-0.40320419844251,0.686798011343181,NA  
"24088","KCTD4",0,NA,NA,NA,NA,NA  
"24089","LINC01055",0.142120095111522,-0.0533240139618842,3.3524751975  
3738,-0.0159058638229611,0.987309491940711,NA  
"24090","LRRC63",0.0644961186387932,-0.0533240139618838,3.352475197537  
38,-0.015905863822961,0.987309491940711,NA  
"24091","SUCLA2-  
AS1",0.106924501560529,0.385965786494404,3.34626872025989,0.1153421373  
95477,0.908173940404949,NA  
"24092","MED4-  
AS1",0.206616213750315,0.576034718369261,3.3406888072366,0.17242992436  
8129,0.863099548245903,NA  
"24093","LINC02333",0.11921983002294,-0.0533240139618846,3.35247519753  
738,-0.0159058638229612,0.987309491940711,NA  
"24094","AL139230.1",0.106924501560529,0.385965786494404,3.34626872025  
989,0.115342137395477,0.908173940404949,NA  
"24095","AL162493.1",0,NA,NA,NA,NA,NA  
"24096","SLITRK6",0,NA,NA,NA,NA,NA  
"24097","GPC5",0.100823152638361,-1.35173207482145,3.35247519753738,-0  
.40320419844251,0.686798011343181,NA  
"24098","GPC6-AS2",0,NA,NA,NA,NA,NA  
"24099","CLDN10",0,NA,NA,NA,NA,NA  
"24100","OXGR1",0.100823152638361,-1.35173207482145,3.35247519753738,-  
0.40320419844251,0.686798011343181,NA  
"24101","AL136961.1",0.204461874445769,-1.96013641505178,3.33548947920  
397,-0.587660799793491,0.556759992345141,NA  
"24102","PCCA-  
AS1",0.102230937222884,-1.35173207482145,3.35247519753738,-0.403204198  
442509,0.686798011343181,NA  
"24103","AL137246.2",0,NA,NA,NA,NA,NA  
"24104","AL138701.2",0,NA,NA,NA,NA,NA  
"24105","AL163534.1",0,NA,NA,NA,NA,NA  
"24106","AL390755.1",0,NA,NA,NA,NA,NA  
"24107","PROZ",0,NA,NA,NA,NA,NA  
"24108","DCUN1D2-AS",0,NA,NA,NA,NA,NA  
"24109","LINC01054",0,NA,NA,NA,NA,NA  
"24110","AL355075.1",0.142120095111522,-0.0533240139618842,3.352475197  
53738,-0.0159058638229611,0.987309491940711,NA  
"24111","AL355075.3",0,NA,NA,NA,NA,NA  
"24112","OR10G3",0.0644961186387932,-0.0533240139618838,3.352475197537  
38,-0.015905863822961,0.987309491940711,NA  
"24113","TRAV1-2",0,NA,NA,NA,NA,NA  
"24114","OR4E1",0,NA,NA,NA,NA,NA

"24115", "TRAV2", 0, NA, NA, NA, NA, NA, NA  
"24116", "TRAV4", 0, NA, NA, NA, NA, NA, NA  
"24117", "TRAV8-1", 0, NA, NA, NA, NA, NA, NA  
"24118", "TRAV10", 0, NA, NA, NA, NA, NA, NA  
"24119", "TRAV12-1", 0, NA, NA, NA, NA, NA, NA  
"24120", "TRAV8-3", 0, NA, NA, NA, NA, NA, NA  
"24121", "TRAV13-1", 0, NA, NA, NA, NA, NA, NA  
"24122", "TRAV12-2", 0, NA, NA, NA, NA, NA, NA  
"24123", "TRAV12-3", 0, NA, NA, NA, NA, NA, NA  
"24124", "TRAV8-6", 0, NA, NA, NA, NA, NA, NA  
"24125", "TRAV16", 0, NA, NA, NA, NA, NA, NA  
"24126", "TRAV21", 0, NA, NA, NA, NA, NA, NA  
"24127", "TRAV24", 0, NA, NA, NA, NA, NA, NA  
"24128", "TRAV25", 0, NA, NA, NA, NA, NA, NA  
"24129", "TRAV26-2", 0, NA, NA, NA, NA, NA, NA  
"24130", "TRAV34", 0, NA, NA, NA, NA, NA, NA  
"24131", "TRAV35", 0, NA, NA, NA, NA, NA, NA  
"24132", "TRAV36DV7", 0, NA, NA, NA, NA, NA, NA  
"24133", "TRAV38-2DV8", 0, NA, NA, NA, NA, NA, NA  
"24134", "TRAV39", 0, NA, NA, NA, NA, NA, NA  
"24135", "TRAV40", 0, NA, NA, NA, NA, NA, NA  
"24136", "AC243965.2", 0, NA, NA, NA, NA, NA, NA  
"24137", "RNF212B", 0.11921983002294, -0.0533240139618846, 3.3524751975373  
8, -0.0159058638229612, 0.987309491940711, NA  
"24138", "BCL2L2-PABPN1", 0, NA, NA, NA, NA, NA, NA  
"24139", "AL136419.2", 0, NA, NA, NA, NA, NA, NA  
"24140", "CPNE6", 0, NA, NA, NA, NA, NA, NA  
"24141", "GPR33", 0, NA, NA, NA, NA, NA, NA  
"24142", "AL161665.2", 0.100823152638361, -1.35173207482145, 3.35247519753  
738, -0.40320419844251, 0.686798011343181, NA  
"24143", "FOXA1", 0, NA, NA, NA, NA, NA, NA  
"24144", "AL132639.3", 0, NA, NA, NA, NA, NA, NA  
"24145", "LINC02319", 0.0644961186387932, -0.0533240139618838, 3.352475197  
53738, -0.015905863822961, 0.987309491940711, NA  
"24146", "AL158801.2", 0.172682080803205, 0.494635591052761, 3.34300496985  
029, 0.147961368742719, 0.882373255878367, NA  
"24147", "AL158801.3", 0, NA, NA, NA, NA, NA, NA  
"24148", "LINC00520", 0.513925774552416, -0.576369323214011, 2.38144919822  
244, -0.242024614106496, 0.808761090808267, NA  
"24149", "HIF1A-AS1", 0, NA, NA, NA, NA, NA, NA  
"24150", "AL161756.3", 0.356398029464938, 1.46065628384533, 2.535617693266  
84, 0.57605540761291, 0.564577731032049, NA  
"24151", "GPX2", 0.284240190223044, 0.69583062743856, 3.33747149429751, 0.2  
08490358233014, 0.834846110249776, NA  
"24152", "AL139022.1", 0.219614265997676, -1.35173207482145, 3.35247519753  
738, -0.40320419844251, 0.686798011343181, NA  
"24153", "AL391261.4", 0.155693188003149, -0.774663427007578, 3.3524751975  
3738, -0.231072082972193, 0.817258802814835, NA  
"24154", "PLEK2", 0.244351032334407, -0.774664026145693, 3.30062972833046,  
-0.234701887187309, 0.814440122883676, NA

"24155", "AL121820.2", 0, NA, NA, NA, NA, NA  
"24156", "AL121820.1", 0, NA, NA, NA, NA, NA  
"24157", "AL359317.1", 0.665098856457496, 1.33035088235154, 2.036239063478  
87, 0.653337275672664, 0.513538866418168, NA  
"24158", "AC004817.1", 0, NA, NA, NA, NA, NA  
"24159", "AC004817.4", 0, NA, NA, NA, NA, NA  
"24160", "AL691403.1", 0.100823152638361, -1.35173207482145, 3.35247519753  
738, -0.40320419844251, 0.686798011343181, NA  
"24161", "ESRRB", 0.128992237277586, 0.513744972953418, 3.34245151459318, 0  
.153703044220807, 0.877843884367224, NA  
"24162", "AL359237.1", 0.219614265997676, -1.35173207482145, 3.35247519753  
738, -0.40320419844251, 0.686798011343181, NA  
"24163", "LINC01147", 0, NA, NA, NA, NA, NA  
"24164", "AL137230.1", 0.672718390331412, -0.681727104460322, 1.9478285341  
4136, -0.349993386230396, 0.726343661160908, NA  
"24165", "AL122020.2", 0.168565237602375, -1.35173207482145, 3.35247519753  
738, -0.40320419844251, 0.686798011343181, NA  
"24166", "SERPINA11", 0, NA, NA, NA, NA, NA  
"24167", "AL133467.4", 0, NA, NA, NA, NA, NA  
"24168", "LINC02312", 0, NA, NA, NA, NA, NA  
"24169", "AL109767.1", 0, NA, NA, NA, NA, NA  
"24170", "AL157871.1", 0, NA, NA, NA, NA, NA  
"24171", "LINC00677", 0.0534622507802646, -0.0533240139618838, 3.352475197  
53738, -0.015905863822961, 0.987309491940711, NA  
"24172", "LINC00637", 0, NA, NA, NA, NA, NA  
"24173", "IGHE", 0.160386752340794, 0.715986771710925, 3.33695183420161, 0.  
214563112470645, 0.830107956063492, NA  
"24174", "IGHGP", 0, NA, NA, NA, NA, NA  
"24175", "IGHV6-1", 0, NA, NA, NA, NA, NA  
"24176", "IGHV1-2", 0.0644961186387932, -0.0533240139618838, 3.35247519753  
738, -0.015905863822961, 0.987309491940711, NA  
"24177", "IGHV1-3", 0, NA, NA, NA, NA, NA  
"24178", "IGHV4-4", 0, NA, NA, NA, NA, NA  
"24179", "IGHV2-5", 0.0644961186387932, -0.0533240139618838, 3.35247519753  
738, -0.015905863822961, 0.987309491940711, NA  
"24180", "IGHV5-10-1", 0, NA, NA, NA, NA, NA  
"24181", "IGHV1-18", 0.310685332713897, -0.774666839538346, 3.045396248280  
73, -0.254373085267864, 0.799207342088715, NA  
"24182", "IGHV3-20", 0, NA, NA, NA, NA, NA  
"24183", "IGHV3-21", 0.22202748838264, -0.774663427007578, 3.3524751975373  
8, -0.231072082972193, 0.817258802814835, NA  
"24184", "IGHV1-24", 0, NA, NA, NA, NA, NA  
"24185", "LINC00226", 0, NA, NA, NA, NA, NA  
"24186", "IGHV4-28", 0, NA, NA, NA, NA, NA  
"24187", "IGHV3-30", 0, NA, NA, NA, NA, NA  
"24188", "IGHV3-33", 0.142120095111522, -0.0533240139618842, 3.35247519753  
738, -0.015905863822961, 0.987309491940711, NA  
"24189", "IGHV4-34", 0, NA, NA, NA, NA, NA  
"24190", "IGHV4-39", 0.469087579333352, 0.745651398935787, 2.1383551458071  
4, 0.348703254647784, 0.727312100605694, NA

"24191", "IGHV3-43", 0.106924501560529, 0.385965786494404, 3.3462687202598  
9, 0.115342137395477, 0.908173940404949, NA  
"24192", "LINC00221", 0.11921983002294, -0.0533240139618846, 3.35247519753  
738, -0.0159058638229612, 0.987309491940711, NA  
"24193", "IGHV1-45", 0, NA, NA, NA, NA, NA  
"24194", "IGHV1-46", 0, NA, NA, NA, NA, NA  
"24195", "IGHV3-48", 0.273505233441565, -0.226106766776126, 2.744902182200  
06, -0.082373342205914, 0.934349833830783, NA  
"24196", "IGHV3-49", 0.0644961186387932, -0.0533240139618838, 3.3524751975  
3738, -0.015905863822961, 0.987309491940711, NA  
"24197", "IGHV5-51", 0.42977514258153, -0.715052001341688, 2.4749037976237  
7, -0.28892112979431, 0.772641733719904, NA  
"24198", "IGHV3-53", 0, NA, NA, NA, NA, NA  
"24199", "IGHV4-59", 0.392296346800881, -0.225649830609692, 2.481196918128  
93, -0.0909439428047712, 0.927537133531743, NA  
"24200", "IGHV4-61", 0, NA, NA, NA, NA, NA  
"24201", "IGHV3-66", 0, NA, NA, NA, NA, NA  
"24202", "IGHV3-69-1", 0, NA, NA, NA, NA, NA  
"24203", "IGHV1-69-2", 0, NA, NA, NA, NA, NA  
"24204", "IGHV3-73", 0, NA, NA, NA, NA, NA  
"24205", "IGHV3-74", 0.168565237602375, -1.35173207482145, 3.3524751975373  
8, -0.40320419844251, 0.686798011343181, NA  
"24206", "AC087386.1", 0, NA, NA, NA, NA, NA  
"24207", "AC012414.5", 0.338834096020616, -0.774667674034573, 2.9654685095  
3071, -0.261229438635032, 0.793915577320881, NA  
"24208", "GOLGA6L22", 0, NA, NA, NA, NA, NA  
"24209", "AC100756.4", 0, NA, NA, NA, NA, NA  
"24210", "AC124312.2", 0, NA, NA, NA, NA, NA  
"24211", "LINC02250", 0, NA, NA, NA, NA, NA  
"24212", "OCA2", 0, NA, NA, NA, NA, NA  
"24213", "GOLGA6L7", 0.40859881964132, 1.72959020043558, 2.37745199351116,  
0.727497423778146, 0.466921292932755, NA  
"24214", "LINC02249", 0.142120095111522, -0.0533240139618842, 3.3524751975  
3738, -0.0159058638229611, 0.987309491940711, NA  
"24215", "AC022929.1", 0, NA, NA, NA, NA, NA  
"24216", "AC013652.2", 0, NA, NA, NA, NA, NA  
"24217", "AC020659.2", 0.11921983002294, -0.0533240139618846, 3.3524751975  
3738, -0.0159058638229612, 0.987309491940711, NA  
"24218", "PLA2G4E-AS1", 0, NA, NA, NA, NA, NA  
"24219", "AC090519.2", 0, NA, NA, NA, NA, NA  
"24220", "AC026770.1", 0, NA, NA, NA, NA, NA  
"24221", "ONECUT1", 0.23843966004588, 0.69583062743856, 3.33747149429751, 0  
.208490358233014, 0.834846110249776, NA  
"24222", "AC012653.2", 0.363570862357347, -0.0560033712720379, 2.588782893  
56983, -0.0216330892061835, 0.982740638333437, NA  
"24223", "AC018904.2", 0, NA, NA, NA, NA, NA  
"24224", "AC092757.2", 0, NA, NA, NA, NA, NA  
"24225", "AC092755.2", 0, NA, NA, NA, NA, NA  
"24226", "KBTBD13", 0, NA, NA, NA, NA, NA  
"24227", "AC055855.1", 0, NA, NA, NA, NA, NA

"24228", "GRAMD2A", 0, NA, NA, NA, NA, NA  
"24229", "LINC02259", 0.482660672224979, -0.116320734128049, 2.12624565608  
63, -0.05470710018623, 0.956371812705413, NA  
"24230", "STRA6", 0, NA, NA, NA, NA, NA  
"24231", "CCDC33", 0.558448362018292, -1.79602275615255, 2.64086766675917,  
-0.680088131169632, 0.496448659172799, NA  
"24232", "AC012435.3", 0, NA, NA, NA, NA, NA  
"24233", "AC113208.5", 0.155693188003149, -0.774663427007578, 3.3524751975  
3738, -0.231072082972193, 0.817258802814835, NA  
"24234", "GOLGA6D", 0, NA, NA, NA, NA, NA  
"24235", "AC090181.1", 0, NA, NA, NA, NA, NA  
"24236", "SH2D7", 0, NA, NA, NA, NA, NA  
"24237", "AC090607.5", 0, NA, NA, NA, NA, NA  
"24238", "AC027811.1", 0.0534622507802646, -0.0533240139618838, 3.35247519  
753738, -0.015905863822961, 0.987309491940711, NA  
"24239", "CTXND1", 0, NA, NA, NA, NA, NA  
"24240", "AC023302.1", 0.0534622507802646, -0.0533240139618838, 3.35247519  
753738, -0.015905863822961, 0.987309491940711, NA  
"24241", "AC068870.1", 0.423097072522546, -1.79554273832128, 2.39217736801  
592, -0.750589300913966, 0.452899862067976, NA  
"24242", "CFAP161", 0.658842797993028, -3.23207946762343, 2.89909419759692  
, -1.11485838242252, 0.264911113332331, NA  
"24243", "TMC3", 0.284685425280735, 0.104122352415883, 2.73164482693201, 0.  
0381170902561391, 0.969594325157982, NA  
"24244", "AC103858.2", 0.166727055861678, -0.774663427007578, 3.3524751975  
3738, -0.231072082972193, 0.817258802814835, NA  
"24245", "AC026624.1", 0.183715948661733, 0.576034712544328, 3.34068880739  
852, 0.172429922616139, 0.863099549623161, NA  
"24246", "AC105339.3", 0, NA, NA, NA, NA, NA  
"24247", "SLC28A1", 0, NA, NA, NA, NA, NA  
"24248", "RHCG", 0.100823152638361, -1.35173207482145, 3.35247519753738, -0  
.40320419844251, 0.686798011343181, NA  
"24249", "AC103739.1", 0, NA, NA, NA, NA, NA  
"24250", "AC127520.1", 0, NA, NA, NA, NA, NA  
"24251", "AC107958.3", 0, NA, NA, NA, NA, NA  
"24252", "AC107958.2", 0, NA, NA, NA, NA, NA  
"24253", "AC103996.3", 0.11921983002294, -0.0533240139618846, 3.3524751975  
3738, -0.0159058638229612, 0.987309491940711, NA  
"24254", "LINC01580", 0, NA, NA, NA, NA, NA  
"24255", "AC009432.2", 0, NA, NA, NA, NA, NA  
"24256", "AC027013.1", 0, NA, NA, NA, NA, NA  
"24257", "LINC02157", 0, NA, NA, NA, NA, NA  
"24258", "SPATA8", 0.201646305276721, -1.9490730241217, 3.3359781915796, -0  
.584258323103367, 0.559046527482917, NA  
"24259", "AC055807.1", 0, NA, NA, NA, NA, NA  
"24260", "LUNAR1", 0, NA, NA, NA, NA, NA  
"24261", "AC015660.3", 0, NA, NA, NA, NA, NA  
"24262", "AC087762.1", 0.106924501560529, 0.385965786494404, 3.34626872025  
989, 0.115342137395477, 0.908173940404949, NA  
"24263", "AC019254.1", 0.100823152638361, -1.35173207482145, 3.35247519753

738,-0.40320419844251,0.686798011343181,NA  
"24264","HBZ",0.168565237602375,-1.35173207482145,3.35247519753738,-0.40320419844251,0.686798011343181,NA  
"24265","HBM",0.102230937222884,-1.35173207482145,3.35247519753738,-0.403204198442509,0.686798011343181,NA  
"24266","AL023881.1",0.540051684633713,-2.94149326573343,2.57754249692421,-1.14120068601915,0.2537864189363,NA  
"24267","AL031008.1",0,NA,NA,NA,NA,NA  
"24268","LMF1-AS1",0.100823152638361,-1.35173207482145,3.35247519753738,-0.40320419844251,0.686798011343181,NA  
"24269","AL031600.2",0,NA,NA,NA,NA,NA  
"24270","MEIOB",0,NA,NA,NA,NA,NA  
"24271","AC005606.2",0,NA,NA,NA,NA,NA  
"24272","AC106820.2",0.284110384636469,-0.774665791363346,3.14291126894145,-0.246480325110883,0.805310433006106,NA  
"24273","AC093525.3",0,NA,NA,NA,NA,NA  
"24274","PRSS22",0.102230937222884,-1.35173207482145,3.35247519753738,-0.403204198442509,0.686798011343181,NA  
"24275","AC004034.1",0,NA,NA,NA,NA,NA  
"24276","KREMEN2",0,NA,NA,NA,NA,NA  
"24277","AC004233.3",0,NA,NA,NA,NA,NA  
"24278","CLDN9",0.102230937222884,-1.35173207482145,3.35247519753738,-0.403204198442509,0.686798011343181,NA  
"24279","AC108134.4",0.154285403418625,-0.774663427007578,3.35247519753738,-0.231072082972193,0.817258802814835,NA  
"24280","AC009171.2",0.754605748554345,0.280621854684238,1.64502676541123,0.170588017523282,0.864547720447027,NA  
"24281","C16orf96",0,NA,NA,NA,NA,NA  
"24282","AC023830.1",0,NA,NA,NA,NA,NA  
"24283","SMIM22",0,NA,NA,NA,NA,NA  
"24284","NAGPA-AS1",0.764806872472616,0.787982844277324,1.60190222965334,0.491904455646987,0.622786888316881,NA  
"24285","RBF0X1",0,NA,NA,NA,NA,NA  
"24286","LITAFD",0,NA,NA,NA,NA,NA  
"24287","GRIN2A",1.63855173128572,-3.85953779798417,1.81541560175322,-2.12598029578289,0.0335049002367186,NA  
"24288","AC027277.2",0.219614265997676,-1.35173207482145,3.35247519753738,-0.40320419844251,0.686798011343181,NA  
"24289","AC133065.1",0,NA,NA,NA,NA,NA  
"24290","AC009121.3",0.11921983002294,-0.0533240139618846,3.35247519753738,-0.0159058638229612,0.987309491940711,NA  
"24291","AC010333.1",0,NA,NA,NA,NA,NA  
"24292","AC010333.3",0,NA,NA,NA,NA,NA  
"24293","AC010401.1",0.102230937222884,-1.35173207482145,3.35247519753738,-0.403204198442509,0.686798011343181,NA  
"24294","AC138932.5",0.403460020245984,1.56382911394003,2.91211969440415,0.537007155627923,0.591262671305975,NA  
"24295","AC126763.1",0.142120095111522,-0.0533240139618842,3.352475197

53738,-0.0159058638229611,0.987309491940711,NA  
"24296","AC136624.1",0,NA,NA,NA,NA,NA  
"24297","AC136624.2",0,NA,NA,NA,NA,NA  
"24298","AC010601.1",0.76519745620089,-0.904892998513024,1.78955020367  
318,-0.505653876966215,0.613099652352306,NA  
"24299","CLEC19A",0,NA,NA,NA,NA,NA  
"24300","AC130456.3",0,NA,NA,NA,NA,NA  
"24301","ANKS4B",0.11921983002294,-0.0533240139618846,3.35247519753738  
,-0.0159058638229612,0.987309491940711,NA  
"24302","VWA3A",0.102230937222884,-1.35173207482145,3.35247519753738,-  
0.403204198442509,0.686798011343181,NA  
"24303","AC092338.1",0.458053926043556,-0.0459491580811541,2.781888560  
23207,-0.0165172533285521,0.986821737799833,NA  
"24304","AC130466.1",0,NA,NA,NA,NA,NA  
"24305","AC008870.3",0,NA,NA,NA,NA,NA  
"24306","SLC5A11",0.0534622507802646,-0.0533240139618838,3.35247519753  
738,-0.015905863822961,0.987309491940711,NA  
"24307","AC016597.2",0,NA,NA,NA,NA,NA  
"24308","AC138904.3",0,NA,NA,NA,NA,NA  
"24309","NPIP7",0.826128376104906,-0.597896447230096,1.79333344185478  
,-0.333399485715112,0.738832751315343,NA  
"24310","NPIP9",0.11921983002294,-0.0533240139618846,3.35247519753738  
,-0.0159058638229612,0.987309491940711,NA  
"24311","TLCD3B",0.102230937222884,-1.35173207482145,3.35247519753738,  
-0.403204198442509,0.686798011343181,NA  
"24312","AC093512.2",0.165319271277154,-0.774663427007578,3.3524751975  
3738,-0.231072082972193,0.817258802814835,NA  
"24313","AC012645.2",0,NA,NA,NA,NA,NA  
"24314","AC026471.3",0.142120095111522,-0.0533240139618842,3.352475197  
53738,-0.0159058638229611,0.987309491940711,NA  
"24315","AHSP",0,NA,NA,NA,NA,NA  
"24316","AC145350.2",0,NA,NA,NA,NA,NA  
"24317","AC136944.1",0.11921983002294,-0.0533240139618846,3.3524751975  
3738,-0.0159058638229612,0.987309491940711,NA  
"24318","AC007494.2",0.11921983002294,-0.0533240139618846,3.3524751975  
3738,-0.0159058638229612,0.987309491940711,NA  
"24319","CBLN1",0.0534622507802646,-0.0533240139618838,3.3524751975373  
8,-0.015905863822961,0.987309491940711,NA  
"24320","AC007614.1",0.100823152638361,-1.35173207482145,3.35247519753  
738,-0.40320419844251,0.686798011343181,NA  
"24321","AC007610.5",0.11921983002294,-0.0533240139618846,3.3524751975  
3738,-0.0159058638229612,0.987309491940711,NA  
"24322","AC007728.1",0,NA,NA,NA,NA,NA  
"24323","AC007333.2",0,NA,NA,NA,NA,NA  
"24324","AC007342.4",0,NA,NA,NA,NA,NA  
"24325","AC007496.1",0,NA,NA,NA,NA,NA  
"24326","AC106738.2",0,NA,NA,NA,NA,NA  
"24327","MT3",0.451472830471552,1.85640408664007,3.29132541825635,0.56  
40293349126,0.572734168140606,NA  
"24328","AC009090.2",0.11921983002294,-0.0533240139618846,3.3524751975

3738,-0.0159058638229612,0.987309491940711,NA  
"24329","AC009090.3",0.11921983002294,-0.0533240139618846,3.3524751975  
3738,-0.0159058638229612,0.987309491940711,NA  
"24330","AC009090.1",0,NA,NA,NA,NA,NA  
"24331","DRC7",0.100823152638361,-1.35173207482145,3.35247519753738,-0  
.40320419844251,0.686798011343181,NA  
"24332","CDH8",0.491155315050409,0.825121690283651,2.1279210973706,0.3  
87759532674039,0.698193995152171,NA  
"24333","AC092337.1",0.142120095111522,-0.0533240139618842,3.352475197  
53738,-0.0159058638229611,0.987309491940711,NA  
"24334","AC012325.1",0,NA,NA,NA,NA,NA  
"24335","CDH16",0,NA,NA,NA,NA,NA  
"24336","AC020978.3",0,NA,NA,NA,NA,NA  
"24337","CDH1",0.0644961186387932,-0.0533240139618838,3.35247519753738  
, -0.015905863822961,0.987309491940711,NA  
"24338","AC092115.3",0.339985857801697,0.0629066323306645,2.5892836069  
1182,0.0242949950182135,0.980617305351133,NA  
"24339","AC020763.1",0,NA,NA,NA,NA,NA  
"24340","AC009097.1",0,NA,NA,NA,NA,NA  
"24341","AC009097.4",0.165319271277154,-0.774663427007578,3.3524751975  
3738,-0.231072082972193,0.817258802814835,NA  
"24342","AC009097.3",0,NA,NA,NA,NA,NA  
"24343","HPR",0.476004603991051,-0.889852425139581,2.13210865741867,-0  
.417357915621861,0.676416632345415,NA  
"24344","AC116667.2",0,NA,NA,NA,NA,NA  
"24345","LINC01568",0,NA,NA,NA,NA,NA  
"24346","AC009120.3",0,NA,NA,NA,NA,NA  
"24347","CHST5",0.590400849521039,-1.80356351435048,1.7959848697988,-1  
.00421977082275,0.315272694486995,NA  
"24348","AC025287.4",0,NA,NA,NA,NA,NA  
"24349","VAT1L",0.142120095111522,-0.0533240139618842,3.35247519753738  
, -0.0159058638229611,0.987309491940711,NA  
"24350","AC009145.3",0,NA,NA,NA,NA,NA  
"24351","AC092718.5",0.69478612604847,-0.585552543719941,1.75886235171  
994,-0.332915502539097,0.739198066984398,NA  
"24352","HSD17B2",0,NA,NA,NA,NA,NA  
"24353","AC099506.1",0.168565237602375,-1.35173207482145,3.35247519753  
738,-0.40320419844251,0.686798011343181,NA  
"24354","AC009123.1",0,NA,NA,NA,NA,NA  
"24355","FAM92B",0.204461874445769,-1.96013641505178,3.33548947920397,  
-0.587660799793491,0.556759992345141,NA  
"24356","LINC02139",0.310685332713897,-0.774666839538346,3.04539624828  
073,-0.254373085267864,0.799207342088715,NA  
"24357","AC092723.5",0,NA,NA,NA,NA,NA  
"24358","AC092723.1",0,NA,NA,NA,NA,NA  
"24359","AC092723.3",0.155693188003149,-0.774663427007578,3.3524751975  
3738,-0.231072082972193,0.817258802814835,NA  
"24360","FOX C2",0.102230937222884,-1.35173207482145,3.35247519753738,-  
0.403204198442509,0.686798011343181,NA  
"24361","FOX L1",0,NA,NA,NA,NA,NA



"24362", "AC136285.3", 0, NA, NA, NA, NA, NA  
"24363", "AC126696.3", 0, NA, NA, NA, NA, NA  
"24364", "AC134312.6", 1.12355583082956, -0.869297599611209, 1.31387186612  
169, -0.661630423807777, 0.508208104579167, NA  
"24365", "AC092384.3", 0, NA, NA, NA, NA, NA  
"24366", "SLC22A31", 0, NA, NA, NA, NA, NA  
"24367", "VPS9D1-  
AS1", 0.0644961186387932, -0.0533240139618838, 3.35247519753738, -0.015905  
863822961, 0.987309491940711, NA  
"24368", "AC015853.3", 0, NA, NA, NA, NA, NA  
"24369", "AC087392.2", 0, NA, NA, NA, NA, NA  
"24370", "OVCA2", 0.67228988823652, -2.4880023399648, 2.18566687585963, -1.  
13832641535836, 0.254984207787919, NA  
"24371", "AC006435.1", 0.274913018026089, -0.226100793799534, 2.7407223210  
9206, -0.0824967900102491, 0.934251670836265, NA  
"24372", "OR1A1", 0, NA, NA, NA, NA, NA  
"24373", "AC027796.5", 0, NA, NA, NA, NA, NA  
"24374", "GGT6", 0, NA, NA, NA, NA, NA  
"24375", "AC091153.2", 0, NA, NA, NA, NA, NA  
"24376", "AC004771.5", 0.11921983002294, -0.0533240139618846, 3.3524751975  
3738, -0.0159058638229612, 0.987309491940711, NA  
"24377", "AC004706.1", 0, NA, NA, NA, NA, NA  
"24378", "YBX2", 0, NA, NA, NA, NA, NA  
"24379", "AC026954.3", 0, NA, NA, NA, NA, NA  
"24380", "GUCY2D", 0, NA, NA, NA, NA, NA  
"24381", "ALOX12B", 0, NA, NA, NA, NA, NA  
"24382", "AC129492.1", 0, NA, NA, NA, NA, NA  
"24383", "MFSD6L", 0, NA, NA, NA, NA, NA  
"24384", "AC005695.2", 0, NA, NA, NA, NA, NA  
"24385", "AC002347.1", 0, NA, NA, NA, NA, NA  
"24386", "TMEM238L", 0.219614265997676, -1.35173207482145, 3.3524751975373  
8, -0.40320419844251, 0.686798011343181, NA  
"24387", "AC005358.2", 0, NA, NA, NA, NA, NA  
"24388", "AC005324.5", 0, NA, NA, NA, NA, NA  
"24389", "AC098850.1", 0, NA, NA, NA, NA, NA  
"24390", "SLC5A10", 0, NA, NA, NA, NA, NA  
"24391", "AC007952.7", 0, NA, NA, NA, NA, NA  
"24392", "AC007952.5", 0, NA, NA, NA, NA, NA  
"24393", "AC004448.2", 0.0644961186387932, -0.0533240139618838, 3.35247519  
753738, -0.015905863822961, 0.987309491940711, NA  
"24394", "AC005730.2", 0.100823152638361, -1.35173207482145, 3.35247519753  
738, -0.40320419844251, 0.686798011343181, NA  
"24395", "AC090774.2", 0, NA, NA, NA, NA, NA  
"24396", "AC068418.1", 0, NA, NA, NA, NA, NA  
"24397", "AC024267.3", 0, NA, NA, NA, NA, NA  
"24398", "AC024267.6", 0.270796174825259, -2.10201442494854, 3.17084321545  
501, -0.662919697417743, 0.507381985665671, NA  
"24399", "AC068025.1", 0.0534622507802646, -0.0533240139618838, 3.35247519  
753738, -0.015905863822961, 0.987309491940711, NA  
"24400", "AC011840.1", 0, NA, NA, NA, NA, NA

"24401", "AC138207.5", 0, NA, NA, NA, NA, NA  
"24402", "AC005899.1", 0, NA, NA, NA, NA, NA  
"24403", "SPACA3", 0.100823152638361, -1.35173207482145, 3.35247519753738, -0.40320419844251, 0.686798011343181, NA  
"24404", "FNDC8", 0, NA, NA, NA, NA, NA  
"24405", "AC015911.5", 0, NA, NA, NA, NA, NA  
"24406", "TBC1D3B", 0, NA, NA, NA, NA, NA  
"24407", "C17orf78", 0.11921983002294, -0.0533240139618846, 3.35247519753738, -0.0159058638229612, 0.987309491940711, NA  
"24408", "AC243654.1", 0.11921983002294, -0.0533240139618846, 3.35247519753738, -0.0159058638229612, 0.987309491940711, NA  
"24409", "C17orf98", 0.195582345891787, 0.494635591052761, 3.34300496985029, 0.147961368742719, 0.882373255878367, NA  
"24410", "AC080112.4", 0.11921983002294, -0.0533240139618846, 3.35247519753738, -0.0159058638229612, 0.987309491940711, NA  
"24411", "KRTAP16-1", 0, NA, NA, NA, NA, NA  
"24412", "KRT15", 0, NA, NA, NA, NA, NA  
"24413", "KRT17", 0, NA, NA, NA, NA, NA  
"24414", "KCNH4", 0, NA, NA, NA, NA, NA  
"24415", "AC100793.3", 0.219614265997676, -1.35173207482145, 3.35247519753738, -0.40320419844251, 0.686798011343181, NA  
"24416", "CFAP97D1", 0, NA, NA, NA, NA, NA  
"24417", "AC007993.3", 0, NA, NA, NA, NA, NA  
"24418", "LINC01976", 0, NA, NA, NA, NA, NA  
"24419", "AC023855.1", 0, NA, NA, NA, NA, NA  
"24420", "SLC4A1", 0.11921983002294, -0.0533240139618846, 3.35247519753738, -0.0159058638229612, 0.987309491940711, NA  
"24421", "CR936218.1", 0.587175968907718, 2.11623826732946, 2.26452156856498, 0.934518927399978, 0.350036277223204, NA  
"24422", "RPRML", 0, NA, NA, NA, NA, NA  
"24423", "AC018521.2", 0.417033113137611, 0.413097229319217, 2.22161725051422, 0.185944374182187, 0.852488383400628, NA  
"24424", "AC091180.4", 0, NA, NA, NA, NA, NA  
"24425", "AC091180.3", 0.11921983002294, -0.0533240139618846, 3.35247519753738, -0.0159058638229612, 0.987309491940711, NA  
"24426", "TAC4", 0, NA, NA, NA, NA, NA  
"24427", "AC005920.4", 0, NA, NA, NA, NA, NA  
"24428", "LINC02073", 0.0644961186387932, -0.0533240139618838, 3.35247519753738, -0.015905863822961, 0.987309491940711, NA  
"24429", "CA10", 0.982602885211297, 0.705820713207708, 1.80468742533252, 0.391104134322683, 0.695720264804972, NA  
"24430", "AC106858.1", 0.11921983002294, -0.0533240139618846, 3.35247519753738, -0.0159058638229612, 0.987309491940711, NA  
"24431", "AC100832.2", 0, NA, NA, NA, NA, NA  
"24432", "LINC01999", 0.328375268806354, 0.172498022251954, 2.6100520245636, 0.0660898789099026, 0.947306268694869, NA  
"24433", "AC005884.1", 0, NA, NA, NA, NA, NA  
"24434", "EFCAB3", 0, NA, NA, NA, NA, NA  
"24435", "AC007780.1", 0.362163077772823, -0.055843711240554, 2.5915710022774, -0.0215482080913392, 0.982808347881005, NA

"24436", "LINC00469", 0, NA, NA, NA, NA, NA  
"24437", "CD300LD", 0, NA, NA, NA, NA, NA  
"24438", "C17orf77", 0, NA, NA, NA, NA, NA  
"24439", "AC016888.1", 0, NA, NA, NA, NA, NA  
"24440", "FADS6", 0, NA, NA, NA, NA, NA  
"24441", "AC011933.4", 0, NA, NA, NA, NA, NA  
"24442", "SMIM6", 0, NA, NA, NA, NA, NA  
"24443", "AANAT", 0.106924501560529, 0.385965786494404, 3.34626872025989, 0.115342137395477, 0.908173940404949, NA  
"24444", "AC015802.4", 0, NA, NA, NA, NA, NA  
"24445", "AC021683.2", 0, NA, NA, NA, NA, NA  
"24446", "DNAH17-AS1", 0, NA, NA, NA, NA, NA  
"24447", "LINC02078", 0, NA, NA, NA, NA, NA  
"24448", "LINC01978", 0, NA, NA, NA, NA, NA  
"24449", "AC127496.6", 0, NA, NA, NA, NA, NA  
"24450", "AC110285.1", 0.11921983002294, -0.0533240139618846, 3.35247519753738, -0.0159058638229612, 0.987309491940711, NA  
"24451", "AP000894.2", 0, NA, NA, NA, NA, NA  
"24452", "AP002478.1", 0.100823152638361, -1.35173207482145, 3.35247519753738, -0.40320419844251, 0.686798011343181, NA  
"24453", "DLGAP1-AS3", 0, NA, NA, NA, NA, NA  
"24454", "AP001496.2", 0, NA, NA, NA, NA, NA  
"24455", "AP001496.1", 0, NA, NA, NA, NA, NA  
"24456", "AP002409.1", 0, NA, NA, NA, NA, NA  
"24457", "GACAT2", 0.458162645918231, -2.13740004782817, 2.33704331160318, -0.914574427104625, 0.360415088930616, NA  
"24458", "AP005432.2", 0.171420620199322, 0.765902268429694, 3.33569101336987, 0.22960827767316, 0.818396174063793, NA  
"24459", "AC006238.2", 0, NA, NA, NA, NA, NA  
"24460", "TXNDC2", 0, NA, NA, NA, NA, NA  
"24461", "AP005137.2", 0.11921983002294, -0.0533240139618846, 3.35247519753738, -0.0159058638229612, 0.987309491940711, NA  
"24462", "ANKRD62", 0, NA, NA, NA, NA, NA  
"24463", "CIDEA", 0.221450767245824, -0.774663427007578, 3.35247519753738, -0.231072082972194, 0.817258802814834, NA  
"24464", "AP002505.3", 0, NA, NA, NA, NA, NA  
"24465", "AP005131.5", 0, NA, NA, NA, NA, NA  
"24466", "AC106037.2", 0, NA, NA, NA, NA, NA  
"24467", "AC023983.1", 0.23843966004588, 0.69583062743856, 3.33747149429751, 0.208490358233014, 0.834846110249776, NA  
"24468", "AC007922.2", 0, NA, NA, NA, NA, NA  
"24469", "AC007922.1", 0, NA, NA, NA, NA, NA  
"24470", "AC007922.4", 0.204461874445769, -1.96013641505178, 3.33548947920397, -0.587660799793491, 0.556759992345141, NA  
"24471", "AC110603.1", 0.11921983002294, -0.0533240139618846, 3.35247519753738, -0.0159058638229612, 0.987309491940711, NA  
"24472", "SLC25A52", 0, NA, NA, NA, NA, NA  
"24473", "AC007998.4", 0, NA, NA, NA, NA, NA  
"24474", "LINC01478", 0, NA, NA, NA, NA, NA  
"24475", "AC090241.2", 0.11921983002294, -0.0533240139618846, 3.3524751975

3738,-0.0159058638229612,0.987309491940711,NA  
"24476","AC105101.2",0.102230937222884,-1.35173207482145,3.35247519753  
738,-0.403204198442509,0.686798011343181,NA  
"24477","AC016866.2",0,NA,NA,NA,NA,NA  
"24478","AC100778.3",0.219614265997676,-1.35173207482145,3.35247519753  
738,-0.40320419844251,0.686798011343181,NA  
"24479","DCC",0.154285403418625,-0.774663427007578,3.35247519753738,-0  
.231072082972193,0.817258802814835,NA  
"24480","AC098848.1",0,NA,NA,NA,NA,NA  
"24481","AC022031.2",0,NA,NA,NA,NA,NA  
"24482","AC090236.2",0,NA,NA,NA,NA,NA  
"24483","AC104365.2",0,NA,NA,NA,NA,NA  
"24484","AC010776.3",0.102230937222884,-1.35173207482145,3.35247519753  
738,-0.403204198442509,0.686798011343181,NA  
"24485","AC090377.1",0,NA,NA,NA,NA,NA  
"24486","AC009802.1",0.772536105169333,-1.42581720930213,1.69563026638  
765,-0.840877423319221,0.400416607441556,NA  
"24487","AC090337.2",0,NA,NA,NA,NA,NA  
"24488","GTSCR1",0,NA,NA,NA,NA,NA  
"24489","CNDP1",0,NA,NA,NA,NA,NA  
"24490","AC068473.2",0,NA,NA,NA,NA,NA  
"24491","AC021594.1",0,NA,NA,NA,NA,NA  
"24492","AC114341.2",0,NA,NA,NA,NA,NA  
"24493","AC010641.2",0,NA,NA,NA,NA,NA  
"24494","C2CD4C",0,NA,NA,NA,NA,NA  
"24495","AC005775.1",0,NA,NA,NA,NA,NA  
"24496","AC005329.3",0,NA,NA,NA,NA,NA  
"24497","AC027307.1",0,NA,NA,NA,NA,NA  
"24498","AC004490.1",0,NA,NA,NA,NA,NA  
"24499","DIRAS1",0,NA,NA,NA,NA,NA  
"24500","AC005786.2",0,NA,NA,NA,NA,NA  
"24501","ATCAY",0,NA,NA,NA,NA,NA  
"24502","AC005339.1",0.631884143971474,-0.00911271204510717,2.01404302  
2433,-0.00452458658708236,0.996389914535697,NA  
"24503","FUT6",0.166727055861678,-0.774663427007578,3.35247519753738,-  
0.231072082972193,0.817258802814835,NA  
"24504","AC011444.1",0.11921983002294,-0.0533240139618846,3.3524751975  
3738,-0.0159058638229612,0.987309491940711,NA  
"24505","SLC25A41",0.544301408266825,-1.4275408446989,1.86319557501936  
, -0.766178743572888,0.443569954432461,NA  
"24506","CAMSAP3",0,NA,NA,NA,NA,NA  
"24507","AC010336.4",0,NA,NA,NA,NA,NA  
"24508","AC010336.2",0,NA,NA,NA,NA,NA  
"24509","LINC01862",0,NA,NA,NA,NA,NA  
"24510","TSPAN16",0,NA,NA,NA,NA,NA  
"24511","AC024575.1",0.297813283114671,-0.22601258613788,2.68166806192  
223,-0.0842805973442787,0.932833338585223,NA  
"24512","AC008543.3",0.0534622507802646,-0.0533240139618838,3.35247519  
753738,-0.015905863822961,0.987309491940711,NA  
"24513","AC008770.3",0,NA,NA,NA,NA,NA

"24514", "AC018761.3", 0, NA, NA, NA, NA, NA  
"24515", "KLF1", 0, NA, NA, NA, NA, NA  
"24516", "AC020916.2", 0, NA, NA, NA, NA, NA  
"24517", "C19orf67", 0, NA, NA, NA, NA, NA  
"24518", "AC011509.3", 0, NA, NA, NA, NA, NA  
"24519", "LINC01841", 0, NA, NA, NA, NA, NA  
"24520", "OR7A17", 0, NA, NA, NA, NA, NA  
"24521", "AC004257.1", 0, NA, NA, NA, NA, NA  
"24522", "OR10H5", 0.11921983002294, -0.0533240139618846, 3.35247519753738  
-0.0159058638229612, 0.987309491940711, NA  
"24523", "CIB3", 0, NA, NA, NA, NA, NA  
"24524", "NWD1", 0, NA, NA, NA, NA, NA  
"24525", "AC011477.9", 0.0644961186387932, -0.0533240139618838, 3.35247519  
753738, -0.015905863822961, 0.987309491940711, NA  
"24526", "AC011477.3", 0.11921983002294, -0.0533240139618846, 3.3524751975  
3738, -0.0159058638229612, 0.987309491940711, NA  
"24527", "LINC00906", 1.11205417627762, -2.34825955608637, 1.5157245335722  
8, -1.54926538699744, 0.121317936754623, NA  
"24528", "CHST8", 0.11921983002294, -0.0533240139618846, 3.35247519753738,  
-0.0159058638229612, 0.987309491940711, NA  
"24529", "AC008747.1", 0.313540715310845, 1.26351236233866, 2.597736835073  
7, 0.486389670146404, 0.62669091310095, NA  
"24530", "AC002128.2", 0, NA, NA, NA, NA, NA  
"24531", "AC002116.2", 0.439677569991484, 0.279268974458065, 2.42445800272  
399, 0.11518820872306, 0.908295944540891, NA  
"24532", "AC022148.2", 0, NA, NA, NA, NA, NA  
"24533", "DPF1", 0.168565237602375, -1.35173207482145, 3.35247519753738, -0  
.40320419844251, 0.686798011343181, NA  
"24534", "LGALS7B", 0.469087579333352, 0.745651398935787, 2.13835514580714  
, 0.348703254647784, 0.727312100605694, NA  
"24535", "AC010605.1", 0, NA, NA, NA, NA, NA  
"24536", "ACP7", 0, NA, NA, NA, NA, NA  
"24537", "NCCRP1", 0.404700395137967, -2.69046402300713, 2.75334645656829,  
-0.97716145259847, 0.328489228312613, NA  
"24538", "DLL3", 0, NA, NA, NA, NA, NA  
"24539", "AC010271.2", 0, NA, NA, NA, NA, NA  
"24540", "AC010271.1", 0.0534622507802646, -0.0533240139618838, 3.35247519  
753738, -0.015905863822961, 0.987309491940711, NA  
"24541", "GRIK5", 0, NA, NA, NA, NA, NA  
"24542", "TMEM145", 0, NA, NA, NA, NA, NA  
"24543", "PSG4", 0, NA, NA, NA, NA, NA  
"24544", "AC005392.2", 0, NA, NA, NA, NA, NA  
"24545", "L34079.3", 0, NA, NA, NA, NA, NA  
"24546", "APOC4", 0.201646305276721, -1.9490730241217, 3.3359781915796, -0.  
584258323103367, 0.559046527482917, NA  
"24547", "AC005757.1", 0, NA, NA, NA, NA, NA  
"24548", "KLC3", 0, NA, NA, NA, NA, NA  
"24549", "FOXA3", 0, NA, NA, NA, NA, NA  
"24550", "GNG8", 0, NA, NA, NA, NA, NA  
"24551", "DACT3-

AS1",0.168565237602375,-1.35173207482145,3.35247519753738,-0.40320419844251,0.686798011343181,NA  
"24552","NOP53-AS1",0,NA,NA,NA,NA,NA  
"24553","AC022154.1",0.411078088196084,-0.771886133852615,2.48376163818463,-0.310773031512309,0.755973172937394,NA  
"24554","AC026803.2",0.0534622507802646,-0.0533240139618838,3.35247519753738,-0.015905863822961,0.987309491940711,NA  
"24555","LHB",0.142120095111522,-0.0533240139618842,3.35247519753738,-0.015905863822961,0.987309491940711,NA  
"24556","AC011495.2",0.422155608707613,1.6830952937054,2.85780011456825,0.588947871170367,0.555896243297414,NA  
"24557","PTOV1-  
AS2",0.0644961186387932,-0.0533240139618838,3.35247519753738,-0.015905863822961,0.987309491940711,NA  
"24558","AC010624.3",0.106924501560529,0.385965786494404,3.34626872025989,0.115342137395477,0.908173940404949,NA  
"24559","AC008655.2",0.195582345891787,0.494635591052761,3.34300496985029,0.147961368742719,0.882373255878367,NA  
"24560","MYBPC2",0,NA,NA,NA,NA,NA  
"24561","ASPDH",0.106924501560529,0.385965786494404,3.34626872025989,0.115342137395477,0.908173940404949,NA  
"24562","SHANK1",0.0644961186387932,-0.0533240139618838,3.35247519753738,-0.015905863822961,0.987309491940711,NA  
"24563","AC063977.6",0,NA,NA,NA,NA,NA  
"24564","AC008750.7",0,NA,NA,NA,NA,NA  
"24565","ZNF534",0.777506013642927,0.316150291901827,1.75125794706445,0.180527541606177,0.856738434502106,NA  
"24566","AC092070.3",0.102230937222884,-1.35173207482145,3.35247519753738,-0.403204198442509,0.686798011343181,NA  
"24567","AC245052.7",0,NA,NA,NA,NA,NA  
"24568","KIR3DL3",0,NA,NA,NA,NA,NA  
"24569","IL11",0.100823152638361,-1.35173207482145,3.35247519753738,-0.40320419844251,0.686798011343181,NA  
"24570","RFPL4A",0,NA,NA,NA,NA,NA  
"24571","AC005498.1",0.0534622507802646,-0.0533240139618838,3.35247519753738,-0.015905863822961,0.987309491940711,NA  
"24572","AC005261.2",0.20774765419889,-0.335374473295219,3.34626863491525,-0.10022341595528,0.920166956363588,NA  
"24573","AC003005.2",0.219614265997676,-1.35173207482145,3.35247519753738,-0.40320419844251,0.686798011343181,NA  
"24574","TMEM74B",0.100823152638361,-1.35173207482145,3.35247519753738,-0.40320419844251,0.686798011343181,NA  
"24575","SIRPG-AS1",0,NA,NA,NA,NA,NA  
"24576","AL049712.1",0,NA,NA,NA,NA,NA  
"24577","LINC01433",0.201646305276721,-1.9490730241217,3.3359781915796,-0.584258323103367,0.559046527482917,NA  
"24578","ADRA1D",0,NA,NA,NA,NA,NA  
"24579","PRND",0.244351032334407,-0.774664026145693,3.30062972833046,-0.234701887187309,0.814440122883676,NA  
"24580","CHGB",0,NA,NA,NA,NA,NA

"24581", "PLCB1-  
IT1", 0.0644961186387932, -0.0533240139618838, 3.35247519753738, -0.015905  
863822961, 0.987309491940711, NA  
"24582", "AL050403.1", 0.11921983002294, -0.0533240139618846, 3.3524751975  
3738, -0.0159058638229612, 0.987309491940711, NA  
"24583", "C20orf187", 0, NA, NA, NA, NA, NA  
"24584", "AL034428.1", 0, NA, NA, NA, NA, NA  
"24585", "PCSK2", 0.102230937222884, -1.35173207482145, 3.35247519753738, -  
0.403204198442509, 0.686798011343181, NA  
"24586", "AL136090.2", 0, NA, NA, NA, NA, NA  
"24587", "AL121830.1", 0, NA, NA, NA, NA, NA  
"24588", "AL049648.1", 0, NA, NA, NA, NA, NA  
"24589", "AL158013.1", 0, NA, NA, NA, NA, NA  
"24590", "LINC01727", 0.229815389915947, -0.207595008908767, 3.34245142718  
562, -0.0621086090347659, 0.950476341218052, NA  
"24591", "AL118508.1", 0.154285403418625, -0.774663427007578, 3.3524751975  
3738, -0.231072082972193, 0.817258802814835, NA  
"24592", "AL035252.2", 0, NA, NA, NA, NA, NA  
"24593", "DEFB118", 0.11921983002294, -0.0533240139618846, 3.3524751975373  
8, -0.0159058638229612, 0.987309491940711, NA  
"24594", "DEFB119", 0, NA, NA, NA, NA, NA  
"24595", "AL117381.1", 0, NA, NA, NA, NA, NA  
"24596", "MYLK2", 0, NA, NA, NA, NA, NA  
"24597", "FOXSI", 0.269388390240736, -2.09481427187859, 3.17548848369632, -  
0.659682528415343, 0.509457580965155, NA  
"24598", "AL031658.1", 0, NA, NA, NA, NA, NA  
"24599", "AL034550.1", 0, NA, NA, NA, NA, NA  
"24600", "AL034550.3", 0, NA, NA, NA, NA, NA  
"24601", "EFCAB8", 0.11921983002294, -0.0533240139618846, 3.35247519753738  
, -0.0159058638229612, 0.987309491940711, NA  
"24602", "AL356652.1", 0.356398029464938, 1.46065628384533, 2.535617693266  
84, 0.57605540761291, 0.564577731032049, NA  
"24603", "AL035420.3", 0.11921983002294, -0.0533240139618846, 3.3524751975  
3738, -0.0159058638229612, 0.987309491940711, NA  
"24604", "AL136172.1", 0, NA, NA, NA, NA, NA  
"24605", "AL031651.1", 0, NA, NA, NA, NA, NA  
"24606", "SLC12A5-AS1", 0, NA, NA, NA, NA, NA  
"24607", "AL354813.1", 0, NA, NA, NA, NA, NA  
"24608", "LINC00494", 0, NA, NA, NA, NA, NA  
"24609", "CSE1L-AS1", 0, NA, NA, NA, NA, NA  
"24610", "LINC01429", 0, NA, NA, NA, NA, NA  
"24611", "LINC01524", 0.710453423484236, -2.51756900012656, 1.735258274186  
1, -1.45083244239674, 0.146826523458698, NA  
"24612", "AL031674.1", 0.813128201411653, -2.82972428204389, 2.08938995166  
829, -1.35433037752693, 0.175630998756552, NA  
"24613", "AL122058.1", 0.261209904979155, -0.00458555259217486, 3.29716284  
438065, -0.00139075708680571, 0.99889033675033, NA  
"24614", "AL354984.1", 0, NA, NA, NA, NA, NA  
"24615", "AL162457.1", 0.11921983002294, -0.0533240139618846, 3.3524751975  
3738, -0.0159058638229612, 0.987309491940711, NA

"24616", "AL354836.1", 0.204461874445769, -1.96013641505178, 3.33548947920  
397, -0.587660799793491, 0.556759992345141, NA  
"24617", "MIR1-1HG-AS1", 0, NA, NA, NA, NA, NA  
"24618", "AL121829.2", 0, NA, NA, NA, NA, NA  
"24619", "ZBTB46-AS1", 0, NA, NA, NA, NA, NA  
"24620", "ABHD16B", 0.0644961186387932, -0.0533240139618838, 3.35247519753  
738, -0.015905863822961, 0.987309491940711, NA  
"24621", "CU639417.4", 0.165319271277154, -0.774663427007578, 3.3524751975  
3738, -0.231072082972193, 0.817258802814835, NA  
"24622", "CU633906.2", 0, NA, NA, NA, NA, NA  
"24623", "CU634019.1", 0.128992237277586, 0.513744972953418, 3.34245151459  
318, 0.153703044220807, 0.877843884367224, NA  
"24624", "FP671120.6", 0, NA, NA, NA, NA, NA  
"24625", "FP236383.5", 1.47257453237438, 0.142182831474833, 1.339843885214  
47, 0.10611895388997, 0.915487973027843, NA  
"24626", "SAMSN1-AS1", 0, NA, NA, NA, NA, NA  
"24627", "AF127577.5", 0, NA, NA, NA, NA, NA  
"24628", "AP000962.1", 1.05681939823472, -1.10561374119688, 1.465777176928  
21, -0.754285002249718, 0.450678105988432, NA  
"24629", "AP001136.1", 0, NA, NA, NA, NA, NA  
"24630", "LINC00161", 0.11921983002294, -0.0533240139618846, 3.35247519753  
738, -0.0159058638229612, 0.987309491940711, NA  
"24631", "BACH1-IT3", 0, NA, NA, NA, NA, NA  
"24632", "AP000251.1", 0, NA, NA, NA, NA, NA  
"24633", "AP000569.1", 0, NA, NA, NA, NA, NA  
"24634", "AP000688.1", 0, NA, NA, NA, NA, NA  
"24635", "AP000696.2", 0, NA, NA, NA, NA, NA  
"24636", "HLCS-IT1", 0, NA, NA, NA, NA, NA  
"24637", "RIPPLY3", 0, NA, NA, NA, NA, NA  
"24638", "B3GALT5", 0, NA, NA, NA, NA, NA  
"24639", "AP001619.1", 0, NA, NA, NA, NA, NA  
"24640", "AP001625.2", 0.11921983002294, -0.0533240139618846, 3.3524751975  
3738, -0.0159058638229612, 0.987309491940711, NA  
"24641", "AP001631.2", 0.218781522057418, -0.267643672651118, 2.9408334274  
8661, -0.0910094635587233, 0.927485071432953, NA  
"24642", "FRGCA", 0, NA, NA, NA, NA, NA  
"24643", "AP001056.1", 0, NA, NA, NA, NA, NA  
"24644", "AP001059.1", 0.100823152638361, -1.35173207482145, 3.35247519753  
738, -0.40320419844251, 0.686798011343181, NA  
"24645", "LRRC3-DT", 0, NA, NA, NA, NA, NA  
"24646", "KRTAP12-3", 0.11921983002294, -0.0533240139618846, 3.35247519753  
738, -0.0159058638229612, 0.987309491940711, NA  
"24647", "AJ011931.1", 0, NA, NA, NA, NA, NA  
"24648", "AP001469.2", 0, NA, NA, NA, NA, NA  
"24649", "AP000542.3", 0, NA, NA, NA, NA, NA  
"24650", "LINC01664", 0, NA, NA, NA, NA, NA  
"24651", "AC016027.3", 0, NA, NA, NA, NA, NA  
"24652", "GGTLC3", 0.0644961186387932, -0.0533240139618838, 3.352475197537  
38, -0.015905863822961, 0.987309491940711, NA  
"24653", "RIMBP3", 0, NA, NA, NA, NA, NA



"24654", "AC000085.1", 0.128992237277586, 0.513744972953418, 3.34245151459  
318, 0.153703044220807, 0.877843884367224, NA  
"24655", "AC000068.2", 0.154285403418625, -0.774663427007578, 3.3524751975  
3738, -0.231072082972193, 0.817258802814835, NA  
"24656", "CCDC188", 0, NA, NA, NA, NA, NA  
"24657", "AC007663.2", 0, NA, NA, NA, NA, NA  
"24658", "AC007731.5", 0, NA, NA, NA, NA, NA  
"24659", "GGT2", 0, NA, NA, NA, NA, NA  
"24660", "AP000553.3", 0, NA, NA, NA, NA, NA  
"24661", "AP000553.2", 0.0644961186387932, -0.0533240139618838, 3.35247519  
753738, -0.015905863822961, 0.987309491940711, NA  
"24662", "AP000553.9", 0.302935778684673, 1.24376146070571, 3.128474743470  
89, 0.397561611549346, 0.690953362451962, NA  
"24663", "IGLVI-70", 0, NA, NA, NA, NA, NA  
"24664", "IGLV4-69", 0.23843966004588, 0.69583062743856, 3.33747149429751,  
0.208490358233014, 0.834846110249776, NA  
"24665", "IGLV10-54", 0, NA, NA, NA, NA, NA  
"24666", "IGLV8-61", 0, NA, NA, NA, NA, NA  
"24667", "IGLV4-60", 0.100823152638361, -1.35173207482145, 3.3524751975373  
8, -0.40320419844251, 0.686798011343181, NA  
"24668", "IGLV6-57", 0.0534622507802646, -0.0533240139618838, 3.3524751975  
3738, -0.015905863822961, 0.987309491940711, NA  
"24669", "IGLV5-52", 0, NA, NA, NA, NA, NA  
"24670", "IGLV1-51", 0, NA, NA, NA, NA, NA  
"24671", "IGLV9-49", 0.11921983002294, -0.0533240139618846, 3.352475197537  
38, -0.0159058638229612, 0.987309491940711, NA  
"24672", "IGLV5-48", 0, NA, NA, NA, NA, NA  
"24673", "IGLV1-47", 0, NA, NA, NA, NA, NA  
"24674", "IGLV7-46", 0, NA, NA, NA, NA, NA  
"24675", "IGLV5-45", 0, NA, NA, NA, NA, NA  
"24676", "IGLV1-44", 0.802249043095424, 0.11831425109554, 2.20213017158801  
, 0.0537271831711113, 0.957152525036464, NA  
"24677", "IGLV1-40", 0.117958369419058, 0.451348601316665, 3.3442811005462  
9, 0.134961322851401, 0.892642454377335, NA  
"24678", "PRAME", 0, NA, NA, NA, NA, NA  
"24679", "GGTLC2", 0.5960991501147, 2.1831996988449, 3.1091040970646, 0.702  
195755010624, 0.482557092567173, NA  
"24680", "IGLV3-27", 0, NA, NA, NA, NA, NA  
"24681", "IGLV3-25", 0, NA, NA, NA, NA, NA  
"24682", "IGLV2-23", 0.100823152638361, -1.35173207482145, 3.3524751975373  
8, -0.40320419844251, 0.686798011343181, NA  
"24683", "IGLV3-21", 0, NA, NA, NA, NA, NA  
"24684", "IGLV2-14", 0.483237393361794, -0.446293681466079, 2.413441654866  
12, -0.184920020985896, 0.853291767330896, NA  
"24685", "IGLV2-11", 0.352281186264108, -0.153285691053076, 2.563476806455  
25, -0.0597960124574085, 0.952318101493915, NA  
"24686", "IGLV3-9", 0, NA, NA, NA, NA, NA  
"24687", "IGLV2-8", 0.11921983002294, -0.0533240139618846, 3.3524751975373  
8, -0.0159058638229612, 0.987309491940711, NA  
"24688", "IGLC5", 0, NA, NA, NA, NA, NA

"24689", "IGLC6", 0.100823152638361, -1.35173207482145, 3.35247519753738, -0.40320419844251, 0.686798011343181, NA  
"24690", "IGLC7", 0.35765949006882, 1.43749688423347, 3.31232068124828, 0.433984816860106, 0.664299466649274, NA  
"24691", "AL022329.1", 0, NA, NA, NA, NA, NA  
"24692", "AL022329.2", 0, NA, NA, NA, NA, NA  
"24693", "Z95115.2", 0, NA, NA, NA, NA, NA  
"24694", "AL008638.6", 0, NA, NA, NA, NA, NA  
"24695", "AL021153.1", 0.102230937222884, -1.35173207482145, 3.35247519753738, -0.403204198442509, 0.686798011343181, NA  
"24696", "SEC14L3", 0, NA, NA, NA, NA, NA  
"24697", "SEC14L4", 0, NA, NA, NA, NA, NA  
"24698", "AC004542.1", 0, NA, NA, NA, NA, NA  
"24699", "RNF185-AS1", 0.11921983002294, -0.0533240139618846, 3.35247519753738, -0.0159058638229612, 0.987309491940711, NA  
"24700", "C22orf24", 0.100823152638361, -1.35173207482145, 3.35247519753738, -0.40320419844251, 0.686798011343181, NA  
"24701", "AL008719.1", 0, NA, NA, NA, NA, NA  
"24702", "SLC5A4-AS1", 0.168565237602375, -1.35173207482145, 3.35247519753738, -0.40320419844251, 0.686798011343181, NA  
"24703", "AL008723.2", 0, NA, NA, NA, NA, NA  
"24704", "Z82198.1", 0.11921983002294, -0.0533240139618846, 3.35247519753738, -0.0159058638229612, 0.987309491940711, NA  
"24705", "TMPRSS6", 0, NA, NA, NA, NA, NA  
"24706", "Z82188.2", 0.0534622507802646, -0.0533240139618838, 3.35247519753738, -0.015905863822961, 0.987309491940711, NA  
"24707", "ELFN2", 0, NA, NA, NA, NA, NA  
"24708", "Z83844.2", 0, NA, NA, NA, NA, NA  
"24709", "AL021707.4", 0, NA, NA, NA, NA, NA  
"24710", "ENTHD1", 0, NA, NA, NA, NA, NA  
"24711", "AL022238.3", 0, NA, NA, NA, NA, NA  
"24712", "SULT4A1", 0.0534622507802646, -0.0533240139618838, 3.35247519753738, -0.015905863822961, 0.987309491940711, NA  
"24713", "PHF21B", 0, NA, NA, NA, NA, NA  
"24714", "LINC01589", 0.142120095111522, -0.0533240139618842, 3.35247519753738, -0.0159058638229611, 0.987309491940711, NA  
"24715", "AL117329.1", 0, NA, NA, NA, NA, NA  
"24716", "U62317.3", 0.128992237277586, 0.513744972953418, 3.34245151459318, 0.153703044220807, 0.877843884367224, NA  
"24717", "ASMT", 0.0534622507802646, -0.0533240139618838, 3.35247519753738, -0.015905863822961, 0.987309491940711, NA  
"24718", "LINC00102", 0, NA, NA, NA, NA, NA  
"24719", "VCX3B", 0, NA, NA, NA, NA, NA  
"24720", "AMELX", 0.11921983002294, -0.0533240139618846, 3.35247519753738, -0.0159058638229612, 0.987309491940711, NA  
"24721", "FAM9C", 0.308570806837251, -0.932162919412784, 3.12364951229485, -0.298421098700012, 0.765381787833686, NA  
"24722", "AC079171.1", 0, NA, NA, NA, NA, NA

"24723", "LINC02154", 0.787967915702897, -2.08730919645806, 1.87397888525275, -1.1138381616165, 0.265348622203045, NA  
"24724", "ASB11", 0.168565237602375, -1.35173207482145, 3.35247519753738, -0.40320419844251, 0.686798011343181, NA  
"24725", "ACE2", 0.195582345891787, 0.494635591052761, 3.34300496985029, 0.147961368742719, 0.882373255878367, NA  
"24726", "GRPR", 0, NA, NA, NA, NA, NA  
"24727", "BEND2", 0.491987844421934, 0.816214377309575, 2.37729355838537, 0.343337647313502, 0.731344461716096, NA  
"24728", "AL807742.1", 0.571893771769235, 0.156485997637527, 2.29725349942922, 0.0681187329462803, 0.945691118257781, NA  
"24729", "PTCHD1-AS", 0.11921983002294, -0.0533240139618846, 3.35247519753738, -0.0159058638229612, 0.987309491940711, NA  
"24730", "AC131011.1", 0, NA, NA, NA, NA, NA  
"24731", "AC107419.1", 0.11921983002294, -0.0533240139618846, 3.35247519753738, -0.0159058638229612, 0.987309491940711, NA  
"24732", "XK", 0.206616213750315, 0.576034718369261, 3.3406888072366, 0.172429924368129, 0.863099548245903, NA  
"24733", "MID1IP1-AS1", 0, NA, NA, NA, NA, NA  
"24734", "PINCR", 0.11921983002294, -0.0533240139618846, 3.35247519753738, -0.0159058638229612, 0.987309491940711, NA  
"24735", "ZNF157", 0.431928015962259, 1.75105566541513, 2.78636292680805, 0.628437756104183, 0.529717209966972, NA  
"24736", "DGKK", 0.11921983002294, -0.0533240139618846, 3.35247519753738, -0.0159058638229612, 0.987309491940711, NA  
"24737", "MAGED4", 0.171420620199322, 0.765902268429694, 3.33569101336987, 0.22960827767316, 0.818396174063793, NA  
"24738", "PAGE2B", 0.168565237602375, -1.35173207482145, 3.35247519753738, -0.40320419844251, 0.686798011343181, NA  
"24739", "PAGE5", 0.166727055861678, -0.774663427007578, 3.35247519753738, -0.231072082972193, 0.817258802814835, NA  
"24740", "ARHGEF9-IT1", 0, NA, NA, NA, NA, NA  
"24741", "AL356317.2", 0.29431150855474, 0.140890502842091, 3.18850312208021, 0.0441870361883708, 0.964755315584153, NA  
"24742", "IGBP1-AS1", 0, NA, NA, NA, NA, NA  
"24743", "DLG3-AS1", 0, NA, NA, NA, NA, NA  
"24744", "AL353804.2", 0, NA, NA, NA, NA, NA  
"24745", "SATL1", 0, NA, NA, NA, NA, NA  
"24746", "POF1B", 0, NA, NA, NA, NA, NA  
"24747", "PCDH11X", 0.102230937222884, -1.35173207482145, 3.35247519753738, -0.403204198442509, 0.686798011343181, NA  
"24748", "DRP2", 0, NA, NA, NA, NA, NA  
"24749", "ARMCX3-AS1", 1.18126970030422, -1.31273011319646, 1.43299997947146, -0.91607127145992, 0.359629514600541, NA  
"24750", "AL035427.1", 0.102230937222884, -1.35173207482145, 3.35247519753738, -0.403204198442509, 0.686798011343181, NA  
"24751", "AL117327.1", 0.284539101300094, -0.150986859606036, 2.72667162408639, -0.0553740532128162, 0.955840466649586, NA

"24752", "Z69733.1", 0.480121447191881, 0.774306247838734, 1.94835900054818, 0.39741456662806, 0.691061775492636, NA  
"24753", "NCBP2L", 0.0534622507802646, -0.0533240139618838, 3.35247519753738, -0.015905863822961, 0.987309491940711, NA  
"24754", "COL4A6", 0.0644961186387932, -0.0533240139618838, 3.35247519753738, -0.015905863822961, 0.987309491940711, NA  
"24755", "AL023877.1", 0, NA, NA, NA, NA, NA  
"24756", "RH0XF2B", 0, NA, NA, NA, NA, NA  
"24757", "XIAP-  
AS1", 0.142120095111522, -0.0533240139618842, 3.35247519753738, -0.015905863822961, 0.987309491940711, NA  
"24758", "AL023653.1", 0, NA, NA, NA, NA, NA  
"24759", "AL139234.1", 0.268957993084562, -1.38388568306271, 3.22384519616786, -0.429265550562948, 0.667729984012798, NA  
"24760", "FRMD7", 0.969253909016868, 0.14504319144025, 1.72123342319791, 0.0842670084634839, 0.932844142510073, NA  
"24761", "AL590282.2", 0, NA, NA, NA, NA, NA  
"24762", "TRESX2", 0.220042982661301, -0.774663427007579, 3.35247519753738, -0.231072082972194, 0.817258802814834, NA  
"24763", "H2AFB1", 0, NA, NA, NA, NA, NA  
"24764", "AL645608.1", 0, NA, NA, NA, NA, NA  
"24765", "AL391244.1", 0.117958369419058, 0.451348601316665, 3.34428110054629, 0.134961322851401, 0.892642454377335, NA  
"24766", "AL589739.1", 0, NA, NA, NA, NA, NA  
"24767", "AL359881.2", 0, NA, NA, NA, NA, NA  
"24768", "AL357140.2", 0.168565237602375, -1.35173207482145, 3.35247519753738, -0.40320419844251, 0.686798011343181, NA  
"24769", "AL451042.1", 0.168565237602375, -1.35173207482145, 3.35247519753738, -0.40320419844251, 0.686798011343181, NA  
"24770", "LINC01783", 0.518062939085753, 2.043307917945, 2.30782069111169, 0.885384174695446, 0.375949464716789, NA  
"24771", "AL021154.1", 0.102230937222884, -1.35173207482145, 3.35247519753738, -0.403204198442509, 0.686798011343181, NA  
"24772", "AL513327.3", 0, NA, NA, NA, NA, NA  
"24773", "ZMYM4-  
AS1", 0.0534622507802646, -0.0533240139618838, 3.35247519753738, -0.015905863822961, 0.987309491940711, NA  
"24774", "AL354864.1", 0.168565237602375, -1.35173207482145, 3.35247519753738, -0.40320419844251, 0.686798011343181, NA  
"24775", "TMC02", 0, NA, NA, NA, NA, NA  
"24776", "FAM183A", 0.284240190223044, 0.69583062743856, 3.33747149429751, 0.208490358233014, 0.834846110249776, NA  
"24777", "CYP4A11", 0, NA, NA, NA, NA, NA  
"24778", "AC096541.1", 0, NA, NA, NA, NA, NA  
"24779", "AL357673.2", 0, NA, NA, NA, NA, NA  
"24780", "DHCR24-  
DT", 0.201646305276721, -1.9490730241217, 3.3359781915796, -0.584258323103367, 0.559046527482917, NA  
"24781", "AL035411.3", 0, NA, NA, NA, NA, NA  
"24782", "AC099791.3", 0.0534622507802646, -0.0533240139618838, 3.35247519

753738,-0.015905863822961,0.987309491940711,NA  
"24783","FOX D3-AS1",0,NA,NA,NA,NA,NA  
"24784","AL353651.2",0.117958369419058,0.451348601316665,3.34428110054  
629,0.134961322851401,0.892642454377335,NA  
"24785","AL157944.1",0.166727055861678,-0.774663427007578,3.3524751975  
3738,-0.231072082972193,0.817258802814835,NA  
"24786","AL445438.1",0,NA,NA,NA,NA,NA  
"24787","AC099670.3",0,NA,NA,NA,NA,NA  
"24788","LINC02586",0.219614265997676,-1.35173207482145,3.352475197537  
38,-0.40320419844251,0.686798011343181,NA  
"24789","SYT6",0,NA,NA,NA,NA,NA  
"24790","LINC01780",0.0644961186387932,-0.0533240139618838,3.352475197  
53738,-0.015905863822961,0.987309491940711,NA  
"24791","LINC01632",0.0644961186387932,-0.0533240139618838,3.352475197  
53738,-0.015905863822961,0.987309491940711,NA  
"24792","AC245100.1",0.0644961186387932,-0.0533240139618838,3.35247519  
753738,-0.015905863822961,0.987309491940711,NA  
"24793","AL391069.1",0,NA,NA,NA,NA,NA  
"24794","RIIAD1",0.142120095111522,-0.0533240139618842,3.3524751975373  
8,-0.015905863822961,0.987309491940711,NA  
"24795","AL031275.1",0.166727055861678,-0.774663427007578,3.3524751975  
3738,-0.231072082972193,0.817258802814835,NA  
"24796","AL133383.1",0,NA,NA,NA,NA,NA  
"24797","LINC01351",0,NA,NA,NA,NA,NA  
"24798","AC104461.1",0.100823152638361,-1.35173207482145,3.35247519753  
738,-0.40320419844251,0.686798011343181,NA  
"24799","GOLT1A",0,NA,NA,NA,NA,NA  
"24800","LEMD1-DT",0,NA,NA,NA,NA,NA  
"24801","AVPR1B",0.0644961186387932,-0.0533240139618838,3.352475197537  
38,-0.015905863822961,0.987309491940711,NA  
"24802","AC244035.1",0.579959483362308,1.13168872108181,2.294013348619  
49,0.493322639889106,0.621784633898684,NA  
"24803","AC096637.2",0,NA,NA,NA,NA,NA  
"24804","LINC01705",0.438395788055094,-0.988298671919134,2.17111756618  
239,-0.455202743192264,0.648963387167953,NA  
"24805","AL121990.1",0.0644961186387932,-0.0533240139618838,3.35247519  
753738,-0.015905863822961,0.987309491940711,NA  
"24806","LINC00184",0,NA,NA,NA,NA,NA  
"24807","AL160408.1",0.0534622507802646,-0.0533240139618838,3.35247519  
753738,-0.015905863822961,0.987309491940711,NA  
"24808","AL357556.4",0,NA,NA,NA,NA,NA  
"24809","AL627095.2",0,NA,NA,NA,NA,NA  
"24810","AC092159.2",0.0534622507802646,-0.0533240139618838,3.35247519  
753738,-0.015905863822961,0.987309491940711,NA  
"24811","AC008073.1",0.0644961186387932,-0.0533240139618838,3.35247519  
753738,-0.015905863822961,0.987309491940711,NA  
"24812","AC008170.1",0,NA,NA,NA,NA,NA  
"24813","AC007391.1",0.0534622507802646,-0.0533240139618838,3.35247519  
753738,-0.015905863822961,0.987309491940711,NA  
"24814","MIR217HG",0,NA,NA,NA,NA,NA

"24815", "LINC01793", 0.0644961186387932, -0.0533240139618838, 3.35247519753738, -0.015905863822961, 0.987309491940711, NA  
"24816", "AC016747.2", 0, NA, NA, NA, NA, NA  
"24817", "AC018462.1", 0.0644961186387932, -0.0533240139618838, 3.35247519753738, -0.015905863822961, 0.987309491940711, NA  
"24818", "AC022201.2", 0, NA, NA, NA, NA, NA  
"24819", "REG3G", 0.273076516777941, -0.774665331385065, 3.18476194606587, -0.243241204367569, 0.807818548712931, NA  
"24820", "LRRTM1", 0, NA, NA, NA, NA, NA  
"24821", "IGKV2-28", 0, NA, NA, NA, NA, NA  
"24822", "IGKV2-29", 0, NA, NA, NA, NA, NA  
"24823", "IGKV2D-28", 0.218781522057418, -0.267643672651118, 2.94083342748661, -0.0910094635587233, 0.927485071432953, NA  
"24824", "IGKV3D-15", 0, NA, NA, NA, NA, NA  
"24825", "LINC01849", 0, NA, NA, NA, NA, NA  
"24826", "EDAR", 0, NA, NA, NA, NA, NA  
"24827", "AC016683.1", 0, NA, NA, NA, NA, NA  
"24828", "AC104653.2", 0.0534622507802646, -0.0533240139618838, 3.35247519753738, -0.015905863822961, 0.987309491940711, NA  
"24829", "AC012363.2", 0, NA, NA, NA, NA, NA  
"24830", "RAB6D", 0, NA, NA, NA, NA, NA  
"24831", "AC105402.4", 0, NA, NA, NA, NA, NA  
"24832", "KCNJ3", 0.128992237277586, 0.513744972953418, 3.34245151459318, 0.153703044220807, 0.877843884367224, NA  
"24833", "XIRP2", 0, NA, NA, NA, NA, NA  
"24834", "AC007163.1", 0, NA, NA, NA, NA, NA  
"24835", "AC122136.1", 0, NA, NA, NA, NA, NA  
"24836", "AC007563.1", 0, NA, NA, NA, NA, NA  
"24837", "AC008281.1", 0, NA, NA, NA, NA, NA  
"24838", "TM4SF20", 0, NA, NA, NA, NA, NA  
"24839", "LINC01891", 0, NA, NA, NA, NA, NA  
"24840", "LINC01986", 0, NA, NA, NA, NA, NA  
"24841", "AC087591.1", 0.0644961186387932, -0.0533240139618838, 3.35247519753738, -0.015905863822961, 0.987309491940711, NA  
"24842", "AC104451.2", 0, NA, NA, NA, NA, NA  
"24843", "FBXW12", 0, NA, NA, NA, NA, NA  
"24844", "LINC00870", 0.0644961186387932, -0.0533240139618838, 3.35247519753738, -0.015905863822961, 0.987309491940711, NA  
"24845", "LINC02050", 0, NA, NA, NA, NA, NA  
"24846", "LINC02044", 0.0644961186387932, -0.0533240139618838, 3.35247519753738, -0.015905863822961, 0.987309491940711, NA  
"24847", "C3orf56", 0, NA, NA, NA, NA, NA  
"24848", "AC108727.1", 0.0644961186387932, -0.0533240139618838, 3.35247519753738, -0.015905863822961, 0.987309491940711, NA  
"24849", "GRK7", 0, NA, NA, NA, NA, NA  
"24850", "LINC02046", 0, NA, NA, NA, NA, NA  
"24851", "CLRN1-AS1", 0, NA, NA, NA, NA, NA  
"24852", "C3orf79", 0.49510400516058, -1.30096743484249, 2.39811982181153, -0.542494759023234, 0.587477716939564, NA  
"24853", "AC073359.1", 0, NA, NA, NA, NA, NA

"24854", "LINC01322", 0, NA, NA, NA, NA, NA  
"24855", "LRRIQ4", 0.117958369419058, 0.451348601316665, 3.34428110054629,  
0.134961322851401, 0.892642454377335, NA  
"24856", "AC092919.1", 0.0534622507802646, -0.0533240139618838, 3.35247519  
753738, -0.015905863822961, 0.987309491940711, NA  
"24857", "TMEM212", 0, NA, NA, NA, NA, NA  
"24858", "AC026355.2", 0.219614265997676, -1.35173207482145, 3.35247519753  
738, -0.40320419844251, 0.686798011343181, NA  
"24859", "SOX2", 0.166727055861678, -0.774663427007578, 3.35247519753738, -  
0.231072082972193, 0.817258802814835, NA  
"24860", "UBXN7-AS1", 0, NA, NA, NA, NA, NA  
"24861", "AC147067.2", 0, NA, NA, NA, NA, NA  
"24862", "TMPRSS11A", 0.218781522057418, -0.267643672651118, 2.94083342748  
661, -0.0910094635587233, 0.927485071432953, NA  
"24863", "AC021146.12", 0.735207436307766, 1.48397496714647, 2.26741067934  
093, 0.654480011348372, 0.512802600952029, NA  
"24864", "CFAP299", 0.0644961186387932, -0.0533240139618838, 3.35247519753  
738, -0.015905863822961, 0.987309491940711, NA  
"24865", "AC025741.1", 0, NA, NA, NA, NA, NA  
"24866", "GYPB", 0, NA, NA, NA, NA, NA  
"24867", "LINC02266", 0, NA, NA, NA, NA, NA  
"24868", "SPOCK3", 0, NA, NA, NA, NA, NA  
"24869", "AC092673.1", 0, NA, NA, NA, NA, NA  
"24870", "AF250324.1", 0, NA, NA, NA, NA, NA  
"24871", "AC010442.1", 0, NA, NA, NA, NA, NA  
"24872", "AC126768.3", 0, NA, NA, NA, NA, NA  
"24873", "LINC01019", 0, NA, NA, NA, NA, NA  
"24874", "AC093307.1", 0.0644961186387932, -0.0533240139618838, 3.35247519  
753738, -0.015905863822961, 0.987309491940711, NA  
"24875", "AC012629.2", 0, NA, NA, NA, NA, NA  
"24876", "LINC02150", 0, NA, NA, NA, NA, NA  
"24877", "AC093274.1", 0, NA, NA, NA, NA, NA  
"24878", "TTC23L", 0.244351032334407, -0.774664026145693, 3.30062972833046  
, -0.234701887187309, 0.814440122883676, NA  
"24879", "AC010425.1", 0, NA, NA, NA, NA, NA  
"24880", "AC091435.2", 0, NA, NA, NA, NA, NA  
"24881", "AC008459.1", 0, NA, NA, NA, NA, NA  
"24882", "AC106798.1", 0.165319271277154, -0.774663427007578, 3.3524751975  
3738, -0.231072082972193, 0.817258802814835, NA  
"24883", "LINC01337", 0, NA, NA, NA, NA, NA  
"24884", "AC008462.1", 0, NA, NA, NA, NA, NA  
"24885", "TSSK1B", 0.0644961186387932, -0.0533240139618838, 3.352475197537  
38, -0.015905863822961, 0.987309491940711, NA  
"24886", "AC006525.1", 0, NA, NA, NA, NA, NA  
"24887", "GFRA3", 0, NA, NA, NA, NA, NA  
"24888", "MATR3", 0, NA, NA, NA, NA, NA  
"24889", "PCDHA1", 0.0534622507802646, -0.0533240139618838, 3.352475197537  
38, -0.015905863822961, 0.987309491940711, NA  
"24890", "PCDHAC2", 0, NA, NA, NA, NA, NA  
"24891", "AC005753.1", 0, NA, NA, NA, NA, NA

"24892", "LINC01844", 0, NA, NA, NA, NA, NA  
"24893", "STK32A-  
AS1", 0.102230937222884, -1.35173207482145, 3.35247519753738, -0.403204198  
442509, 0.686798011343181, NA  
"24894", "JAKMIP2-AS1", 0, NA, NA, NA, NA, NA  
"24895", "AC091962.1", 0.0644961186387932, -0.0533240139618838, 3.35247519  
753738, -0.015905863822961, 0.987309491940711, NA  
"24896", "AC091979.1", 0.0644961186387932, -0.0533240139618838, 3.35247519  
753738, -0.015905863822961, 0.987309491940711, NA  
"24897", "LINC01847", 0.117958369419058, 0.451348601316665, 3.344281100546  
29, 0.134961322851401, 0.892642454377335, NA  
"24898", "AC140125.2", 0, NA, NA, NA, NA, NA  
"24899", "AC104117.5", 0, NA, NA, NA, NA, NA  
"24900", "BTNL3", 0, NA, NA, NA, NA, NA  
"24901", "AL357054.3", 0, NA, NA, NA, NA, NA  
"24902", "AL162718.1", 0, NA, NA, NA, NA, NA  
"24903", "ZBED9", 0, NA, NA, NA, NA, NA  
"24904", "AL049543.1", 0.168565237602375, -1.35173207482145, 3.35247519753  
738, -0.40320419844251, 0.686798011343181, NA  
"24905", "AL662791.1", 0.393448108581962, 0.326503997736806, 2.48902120531  
645, 0.131177668169081, 0.895634761509023, NA  
"24906", "FOXP4-  
AS1", 0.168565237602375, -1.35173207482145, 3.35247519753738, -0.403204198  
44251, 0.686798011343181, NA  
"24907", "HCRTR2", 0.32184520322056, -2.1004006767475, 3.00004113479613, -0  
.70012395909706, 0.483849894373614, NA  
"24908", "AL365226.1", 0.0534622507802646, -0.0533240139618838, 3.35247519  
753738, -0.015905863822961, 0.987309491940711, NA  
"24909", "AL357507.1", 0.56943119989061, 2.20551954554877, 2.6322316714692  
9, 0.837889601228628, 0.402092709545351, NA  
"24910", "AL356277.2", 0.0644961186387932, -0.0533240139618838, 3.35247519  
753738, -0.015905863822961, 0.987309491940711, NA  
"24911", "UFL1-  
AS1", 0.364908976115702, 1.58154481889382, 2.88461307024729, 0.54826931043  
4152, 0.583506996834364, NA  
"24912", "AL589740.1", 0, NA, NA, NA, NA, NA  
"24913", "AL121957.1", 0.0644961186387932, -0.0533240139618838, 3.35247519  
753738, -0.015905863822961, 0.987309491940711, NA  
"24914", "AL589684.1", 0.106924501560529, 0.385965786494404, 3.34626872025  
989, 0.115342137395477, 0.908173940404949, NA  
"24915", "AL121938.1", 0.0644961186387932, -0.0533240139618838, 3.35247519  
753738, -0.015905863822961, 0.987309491940711, NA  
"24916", "AL591468.1", 0, NA, NA, NA, NA, NA  
"24917", "AL355596.2", 0.386341321859354, -1.51636157444548, 2.48773801445  
418, -0.609534269941273, 0.542170364647509, NA  
"24918", "LINC02840", 0.349867749310412, 0.173306032285619, 2.562564565380  
45, 0.067629918335302, 0.946080238528221, NA  
"24919", "AL109933.5", 0.128992237277586, 0.513744972953418, 3.34245151459  
318, 0.153703044220807, 0.877843884367224, NA  
"24920", "AL139393.2", 0, NA, NA, NA, NA, NA



"24921", "AL138716.1", 0.102230937222884, -1.35173207482145, 3.35247519753738, -0.403204198442509, 0.686798011343181, NA  
"24922", "AL590302.2", 0, NA, NA, NA, NA, NA  
"24923", "LINC02487", 0, NA, NA, NA, NA, NA  
"24924", "AL136099.1", 0, NA, NA, NA, NA, NA  
"24925", "AC091729.1", 0, NA, NA, NA, NA, NA  
"24926", "AC102953.1", 0, NA, NA, NA, NA, NA  
"24927", "AC004895.1", 0, NA, NA, NA, NA, NA  
"24928", "SOSTDC1", 0.0644961186387932, -0.0533240139618838, 3.35247519753738, -0.015905863822961, 0.987309491940711, NA  
"24929", "TBX20", 0, NA, NA, NA, NA, NA  
"24930", "TRGV6", 0, NA, NA, NA, NA, NA  
"24931", "AC011228.2", 0, NA, NA, NA, NA, NA  
"24932", "AC004969.1", 0.0644961186387932, -0.0533240139618838, 3.35247519753738, -0.015905863822961, 0.987309491940711, NA  
"24933", "AC005071.1", 0, NA, NA, NA, NA, NA  
"24934", "AC069281.1", 0, NA, NA, NA, NA, NA  
"24935", "COL26A1", 0, NA, NA, NA, NA, NA  
"24936", "SPDYE2", 0, NA, NA, NA, NA, NA  
"24937", "HYAL4", 0, NA, NA, NA, NA, NA  
"24938", "GPR37", 0, NA, NA, NA, NA, NA  
"24939", "TAS2R5", 0, NA, NA, NA, NA, NA  
"24940", "TRBV4-2", 0.100823152638361, -1.35173207482145, 3.35247519753738, -0.40320419844251, 0.686798011343181, NA  
"24941", "TRBV5-5", 0, NA, NA, NA, NA, NA  
"24942", "TRBV23-1", 0, NA, NA, NA, NA, NA  
"24943", "MNX1-AS1", 0, NA, NA, NA, NA, NA  
"24944", "KBTBD11-OT1", 0, NA, NA, NA, NA, NA  
"24945", "AF233439.1", 0.246950606696644, 1.09770941200628, 3.29958282364932, 0.332681272353157, 0.739374887572934, NA  
"24946", "FGL1", 0, NA, NA, NA, NA, NA  
"24947", "STMN4", 0, NA, NA, NA, NA, NA  
"24948", "AC026979.1", 0.168565237602375, -1.35173207482145, 3.35247519753738, -0.40320419844251, 0.686798011343181, NA  
"24949", "TRIM55", 0, NA, NA, NA, NA, NA  
"24950", "MIR2052HG", 0.255108556056986, -1.37243947120329, 3.28104337859569, -0.418293607501983, 0.675732462863087, NA  
"24951", "PI15", 0.626118881094856, 1.41412238710867, 2.19211224236066, 0.645095793811093, 0.518865109467947, NA  
"24952", "AC036214.1", 0, NA, NA, NA, NA, NA  
"24953", "AC036214.4", 0, NA, NA, NA, NA, NA  
"24954", "AC117834.2", 0.0644961186387932, -0.0533240139618838, 3.35247519753738, -0.015905863822961, 0.987309491940711, NA  
"24955", "AP003548.1", 0, NA, NA, NA, NA, NA  
"24956", "SNX31", 0, NA, NA, NA, NA, NA  
"24957", "TRHR", 0, NA, NA, NA, NA, NA  
"24958", "COLEC10", 0.213849003121058, 0.96816891762709, 3.33094636315095, 0.290658813464423, 0.771312274283839, NA  
"24959", "AC087354.1", 0, NA, NA, NA, NA, NA  
"24960", "AC100803.2", 0.0644961186387932, -0.0533240139618838, 3.35247519

753738,-0.015905863822961,0.987309491940711,NA  
"24961","SLURP2",0,NA,NA,NA,NA,NA  
"24962","AC234917.1",0.100823152638361,-1.35173207482145,3.35247519753  
738,-0.40320419844251,0.686798011343181,NA  
"24963","AC234917.2",0,NA,NA,NA,NA,NA  
"24964","AL162725.2",0.142120095111522,-0.0533240139618842,3.352475197  
53738,-0.015905863822961,0.987309491940711,NA  
"24965","CNTNAP3C",0,NA,NA,NA,NA,NA  
"24966","C9orf135",0,NA,NA,NA,NA,NA  
"24967","AL583829.1",0.128992237277586,0.513744972953418,3.34245151459  
318,0.153703044220807,0.877843884367224,NA  
"24968","CARNMT1-  
AS1",0.106924501560529,0.385965786494404,3.34626872025989,0.1153421373  
95477,0.908173940404949,NA  
"24969","AL158154.3",0.0644961186387932,-0.0533240139618838,3.35247519  
753738,-0.015905863822961,0.987309491940711,NA  
"24970","AL358937.1",0.106924501560529,0.385965786494404,3.34626872025  
989,0.115342137395477,0.908173940404949,NA  
"24971","TEX48",0,NA,NA,NA,NA,NA  
"24972","AL137024.1",0,NA,NA,NA,NA,NA  
"24973","AL157829.1",0,NA,NA,NA,NA,NA  
"24974","BX649632.1",0,NA,NA,NA,NA,NA  
"24975","OBP2A",0,NA,NA,NA,NA,NA  
"24976","AL357833.1",0,NA,NA,NA,NA,NA  
"24977","LINC00705",0,NA,NA,NA,NA,NA  
"24978","AL732437.2",0.0534622507802646,-0.0533240139618838,3.35247519  
753738,-0.015905863822961,0.987309491940711,NA  
"24979","AL353586.1",0.700011842756773,1.42323017048782,1.965799111094  
12,0.723995734078689,0.469068354040483,NA  
"24980","AL607028.1",0.0644961186387932,-0.0533240139618838,3.35247519  
753738,-0.015905863822961,0.987309491940711,NA  
"24981","ZNF25-DT",0,NA,NA,NA,NA,NA  
"24982","LINC02623",0.371188930307446,-1.78176894224546,2.914775301552  
75,-0.61128860989603,0.541008530177145,NA  
"24983","FXVD4",0.106924501560529,0.385965786494404,3.34626872025989,0  
.115342137395477,0.908173940404949,NA  
"24984","ANXA8",0.117958369419058,0.451348601316665,3.34428110054629,0  
.134961322851401,0.892642454377335,NA  
"24985","DUSP13",0,NA,NA,NA,NA,NA  
"24986","AL133481.1",0.102230937222884,-1.35173207482145,3.35247519753  
738,-0.403204198442509,0.686798011343181,NA  
"24987","AL096706.1",0,NA,NA,NA,NA,NA  
"24988","IFIT1B",0.0644961186387932,-0.0533240139618838,3.352475197537  
38,-0.015905863822961,0.987309491940711,NA  
"24989","AL157400.4",0.0644961186387932,-0.0533240139618838,3.35247519  
753738,-0.015905863822961,0.987309491940711,NA  
"24990","AL389885.1",0,NA,NA,NA,NA,NA  
"24991","SORCS1",0,NA,NA,NA,NA,NA  
"24992","PRLHR",0,NA,NA,NA,NA,NA  
"24993","AC136475.4",0,NA,NA,NA,NA,NA

"24994", "HBE1", 0.160386752340794, 0.715986771710925, 3.33695183420161, 0.214563112470645, 0.830107956063492, NA  
"24995", "TUB-  
AS1", 0.307439366388676, -0.151735553622885, 2.6698589116342, -0.0568327985279224, 0.954678386705447, NA  
"24996", "AC104031.1", 0.168565237602375, -1.35173207482145, 3.35247519753738, -0.40320419844251, 0.686798011343181, NA  
"24997", "KCNJ11", 0, NA, NA, NA, NA, NA  
"24998", "CSRP3", 0, NA, NA, NA, NA, NA  
"24999", "SLC22A9", 0, NA, NA, NA, NA, NA  
"25000", "AP006333.2", 0, NA, NA, NA, NA, NA  
"25001", "SPDYC", 0, NA, NA, NA, NA, NA  
"25002", "CCDC87", 0.286523607021433, -0.265776410372375, 2.71200358897697, -0.0980000216270479, 0.921932276195533, NA  
"25003", "AP002770.1", 0, NA, NA, NA, NA, NA  
"25004", "AP001189.5", 0.220189306641942, -0.267602342861375, 2.93506496557825, -0.0911742486111047, 0.927354136344172, NA  
"25005", "AP001189.3", 0, NA, NA, NA, NA, NA  
"25006", "THRSP", 0.204461874445769, -1.96013641505178, 3.33548947920397, -0.587660799793491, 0.556759992345141, NA  
"25007", "AP003086.1", 0.224882870979587, 1.01003906181063, 3.32983728260984, 0.303329855511435, 0.7616384958927, NA  
"25008", "AP003110.1", 0.231223174500471, -0.207595008908767, 3.34245142718562, -0.062108609034766, 0.950476341218052, NA  
"25009", "AP001767.3", 0, NA, NA, NA, NA, NA  
"25010", "LINC02700", 0, NA, NA, NA, NA, NA  
"25011", "CNTN5", 0.0644961186387932, -0.0533240139618838, 3.35247519753738, -0.015905863822961, 0.987309491940711, NA  
"25012", "MMP1", 0, NA, NA, NA, NA, NA  
"25013", "LINC02552", 0.166727055861678, -0.774663427007578, 3.35247519753738, -0.231072082972193, 0.817258802814835, NA  
"25014", "AP003973.3", 0.0644961186387932, -0.0533240139618838, 3.35247519753738, -0.015905863822961, 0.987309491940711, NA  
"25015", "PKN0X2-  
AS1", 0.0644961186387932, -0.0533240139618838, 3.35247519753738, -0.015905863822961, 0.987309491940711, NA  
"25016", "PATE2", 0.155693188003149, -0.774663427007578, 3.35247519753738, -0.231072082972193, 0.817258802814835, NA  
"25017", "AP000911.1", 0.0644961186387932, -0.0533240139618838, 3.35247519753738, -0.015905863822961, 0.987309491940711, NA  
"25018", "AC006063.1", 0, NA, NA, NA, NA, NA  
"25019", "A2ML1-AS1", 0, NA, NA, NA, NA, NA  
"25020", "AC092793.1", 0.0644961186387932, -0.0533240139618838, 3.35247519753738, -0.015905863822961, 0.987309491940711, NA  
"25021", "PIK3C2G", 0, NA, NA, NA, NA, NA  
"25022", "AC025154.2", 0.195582345891787, 0.494635591052761, 3.34300496985029, 0.147961368742719, 0.882373255878367, NA  
"25023", "AQP6", 0, NA, NA, NA, NA, NA  
"25024", "KRT85", 0, NA, NA, NA, NA, NA  
"25025", "KRT6B", 0, NA, NA, NA, NA, NA

"25026", "HOXC13-  
AS", 0.0644961186387932, -0.0533240139618838, 3.35247519753738, -0.0159058  
63822961, 0.987309491940711, NA  
"25027", "SLC39A5", 0.275489739162904, -0.333877366261583, 3.2086972406745  
6, -0.104053870221608, 0.917126598293383, NA  
"25028", "APOF", 0.0534622507802646, -0.0533240139618838, 3.35247519753738  
, -0.015905863822961, 0.987309491940711, NA  
"25029", "AC025165.1", 0.166727055861678, -0.774663427007578, 3.3524751975  
3738, -0.231072082972193, 0.817258802814835, NA  
"25030", "LINC02388", 0.0644961186387932, -0.0533240139618838, 3.352475197  
53738, -0.015905863822961, 0.987309491940711, NA  
"25031", "AC084357.2", 0.117958369419058, 0.451348601316665, 3.34428110054  
629, 0.134961322851401, 0.892642454377335, NA  
"25032", "AC010196.1", 0.117958369419058, 0.451348601316665, 3.34428110054  
629, 0.134961322851401, 0.892642454377335, NA  
"25033", "LINC02392", 0.0644961186387932, -0.0533240139618838, 3.352475197  
53738, -0.015905863822961, 0.987309491940711, NA  
"25034", "AC007298.1", 0, NA, NA, NA, NA, NA  
"25035", "AC010203.2", 0.100823152638361, -1.35173207482145, 3.35247519753  
738, -0.40320419844251, 0.686798011343181, NA  
"25036", "AC010205.1", 0.358747277864394, -1.79344174898354, 2.50947896308  
126, -0.714666978830322, 0.474814846659672, NA  
"25037", "AC079385.1", 0, NA, NA, NA, NA, NA  
"25038", "AC079385.2", 0.142120095111522, -0.0533240139618842, 3.352475197  
53738, -0.015905863822961, 0.987309491940711, NA  
"25039", "DAO", 0, NA, NA, NA, NA, NA  
"25040", "LINC01405", 0, NA, NA, NA, NA, NA  
"25041", "LINC02405", 0.0644961186387932, -0.0533240139618838, 3.352475197  
53738, -0.015905863822961, 0.987309491940711, NA  
"25042", "LINC00421", 0.555541949435134, 0.94417712328339, 2.6835402348618  
6, 0.351840121872439, 0.724958167096412, NA  
"25043", "GJB6", 0, NA, NA, NA, NA, NA  
"25044", "AL138960.1", 0, NA, NA, NA, NA, NA  
"25045", "PCDH20", 1.18832902169703, 3.1641739041472, 2.27030588985974, 1.3  
9372140039803, 0.163401751240041, NA  
"25046", "LINC00355", 0, NA, NA, NA, NA, NA  
"25047", "LM07DN-  
IT1", 0.0534622507802646, -0.0533240139618838, 3.35247519753738, -0.015905  
863822961, 0.987309491940711, NA  
"25048", "AL365394.1", 0, NA, NA, NA, NA, NA  
"25049", "SOX21-AS1", 0, NA, NA, NA, NA, NA  
"25050", "LINC00567", 0.0644961186387932, -0.0533240139618838, 3.352475197  
53738, -0.015905863822961, 0.987309491940711, NA  
"25051", "AL137002.1", 0, NA, NA, NA, NA, NA  
"25052", "TPPP2", 0, NA, NA, NA, NA, NA  
"25053", "TRAV1-1", 0, NA, NA, NA, NA, NA  
"25054", "TRAV38-1", 0, NA, NA, NA, NA, NA  
"25055", "LMLN2", 1.08192562264706, 1.5092328556926, 2.05130396283586, 0.73  
5743158028192, 0.461887019503381, NA  
"25056", "AL355053.1", 0.30528502708413, -2.35094355977522, 3.025282911707

48,-0.777098746922923,0.437100513227499,NA  
"25057","AL132857.1",0.0644961186387932,-0.0533240139618838,3.35247519  
753738,-0.015905863822961,0.987309491940711,NA  
"25058","AL390800.1",0,NA,NA,NA,NA,NA  
"25059","AL049870.2",0,NA,NA,NA,NA,NA  
"25060","AL121809.2",0,NA,NA,NA,NA,NA  
"25061","AC005225.1",0.0644961186387932,-0.0533240139618838,3.35247519  
753738,-0.015905863822961,0.987309491940711,NA  
"25062","AC0T6",0,NA,NA,NA,NA,NA  
"25063","AC013451.1",0.142120095111522,-0.0533240139618842,3.352475197  
53738,-0.015905863822961,0.987309491940711,NA  
"25064","AF111169.4",0,NA,NA,NA,NA,NA  
"25065","AL157955.1",0,NA,NA,NA,NA,NA  
"25066","AL161669.1",0,NA,NA,NA,NA,NA  
"25067","ASPG",0.244351032334407,-0.774664026145693,3.30062972833046,-  
0.234701887187309,0.814440122883676,NA  
"25068","IGHV7-4-1",0,NA,NA,NA,NA,NA  
"25069","IGHV3-11",0,NA,NA,NA,NA,NA  
"25070","IGHV3-13",0,NA,NA,NA,NA,NA  
"25071","IGHV1-69D",0.201646305276721,-1.9490730241217,3.3359781915796  
, -0.584258323103367,0.559046527482917,NA  
"25072","AC090877.2",0.102230937222884,-1.35173207482145,3.35247519753  
738,-0.403204198442509,0.686798011343181,NA  
"25073","ACTC1",0,NA,NA,NA,NA,NA  
"25074","AC022196.1",0.0644961186387932,-0.0533240139618838,3.35247519  
753738,-0.015905863822961,0.987309491940711,NA  
"25075","EXD1",0,NA,NA,NA,NA,NA  
"25076","AC084757.4",0.209155438783414,-0.335374473295219,3.3462686349  
1525,-0.10022341595528,0.920166956363588,NA  
"25077","AC090651.1",0.0644961186387932,-0.0533240139618838,3.35247519  
753738,-0.015905863822961,0.987309491940711,NA  
"25078","AC090515.6",0.0644961186387932,-0.0533240139618838,3.35247519  
753738,-0.015905863822961,0.987309491940711,NA  
"25079","AC103740.2",0.297557474879961,-0.207493288647577,3.1244602259  
8217,-0.0664093230959124,0.947051947833083,NA  
"25080","AC009292.1",0.567902716647808,-1.34365899866877,2.27092491316  
281,-0.59167918361396,0.554065438487949,NA  
"25081","AC023300.2",0.0534622507802646,-0.0533240139618838,3.35247519  
753738,-0.015905863822961,0.987309491940711,NA  
"25082","AC243562.3",0,NA,NA,NA,NA,NA  
"25083","AC087468.2",0.168565237602375,-1.35173207482145,3.35247519753  
738,-0.40320419844251,0.686798011343181,NA  
"25084","LINC01586",0,NA,NA,NA,NA,NA  
"25085","AC116903.1",0,NA,NA,NA,NA,NA  
"25086","AC104260.1",0,NA,NA,NA,NA,NA  
"25087","AC024651.1",0,NA,NA,NA,NA,NA  
"25088","CERS3",0.0644961186387932,-0.0533240139618838,3.3524751975373  
8,-0.015905863822961,0.987309491940711,NA  
"25089","AC140725.1",0.117958369419058,0.451348601316665,3.34428110054  
629,0.134961322851401,0.892642454377335,NA

"25090", "Z92544.1", 0.451842878298587, -0.604442772514498, 2.155673440609  
25, -0.280396260921443, 0.77917350539591, NA  
"25091", "AL032819.1", 0.117958369419058, 0.451348601316665, 3.34428110054  
629, 0.134961322851401, 0.892642454377335, NA  
"25092", "NTN3", 0, NA, NA, NA, NA, NA  
"25093", "AC025283.2", 0.0644961186387932, -0.0533240139618838, 3.35247519  
753738, -0.015905863822961, 0.987309491940711, NA  
"25094", "BCAR4", 0, NA, NA, NA, NA, NA  
"25095", "AC109460.4", 0, NA, NA, NA, NA, NA  
"25096", "TOX3", 0, NA, NA, NA, NA, NA  
"25097", "AC099521.3", 0, NA, NA, NA, NA, NA  
"25098", "AC009120.4", 0.0644961186387932, -0.0533240139618838, 3.35247519  
753738, -0.015905863822961, 0.987309491940711, NA  
"25099", "CTRB2", 0, NA, NA, NA, NA, NA  
"25100", "AC092142.1", 0, NA, NA, NA, NA, NA  
"25101", "AC010531.5", 0, NA, NA, NA, NA, NA  
"25102", "TRARG1", 0.219614265997676, -1.35173207482145, 3.35247519753738,  
-0.40320419844251, 0.686798011343181, NA  
"25103", "ALOX12", 0, NA, NA, NA, NA, NA  
"25104", "TME95", 0.343766400388244, -1.37533059850399, 2.97715619562404,  
-0.461961183133594, 0.644109157014252, NA  
"25105", "DNAH2", 0.166727055861678, -0.774663427007578, 3.35247519753738,  
-0.231072082972193, 0.817258802814835, NA  
"25106", "AC135178.2", 0, NA, NA, NA, NA, NA  
"25107", "AC005277.2", 0.268957993084562, -1.38388568306271, 3.22384519616  
786, -0.429265550562948, 0.667729984012798, NA  
"25108", "AC005772.2", 0.102230937222884, -1.35173207482145, 3.35247519753  
738, -0.403204198442509, 0.686798011343181, NA  
"25109", "LINC02094", 0.0644961186387932, -0.0533240139618838, 3.352475197  
53738, -0.015905863822961, 0.987309491940711, NA  
"25110", "AC132825.3", 0.102230937222884, -1.35173207482145, 3.35247519753  
738, -0.403204198442509, 0.686798011343181, NA  
"25111", "AC104564.4", 0, NA, NA, NA, NA, NA  
"25112", "GPR179", 0, NA, NA, NA, NA, NA  
"25113", "KRT12", 0.50385445622072, -0.0484666679965598, 2.72990838289417,  
-0.0177539540521784, 0.985835138306683, NA  
"25114", "KRTAP4-11", 0, NA, NA, NA, NA, NA  
"25115", "FAM215A", 0, NA, NA, NA, NA, NA  
"25116", "PYY", 0, NA, NA, NA, NA, NA  
"25117", "MAPT-  
IT1", 0.0644961186387932, -0.0533240139618838, 3.35247519753738, -0.015905  
863822961, 0.987309491940711, NA  
"25118", "LINC01982", 0.388179503600051, -2.37645961319578, 2.863953050335  
92, -0.829783020680815, 0.406661472415033, NA  
"25119", "AC015845.2", 0, NA, NA, NA, NA, NA  
"25120", "GH1", 0, NA, NA, NA, NA, NA  
"25121", "AC011591.1", 0.165319271277154, -0.774663427007578, 3.3524751975  
3738, -0.231072082972193, 0.817258802814835, NA  
"25122", "LINC01497", 0.22202748838264, -0.774663427007578, 3.352475197537  
38, -0.231072082972193, 0.817258802814835, NA

"25123", "OTOP2", 0, NA, NA, NA, NA, NA  
"25124", "AC027601.1", 0, NA, NA, NA, NA, NA  
"25125", "AC024361.2", 0, NA, NA, NA, NA, NA  
"25126", "AP005230.1", 0, NA, NA, NA, NA, NA  
"25127", "DSC1", 0, NA, NA, NA, NA, NA  
"25128", "AC012123.1", 0, NA, NA, NA, NA, NA  
"25129", "AC100778.1", 0, NA, NA, NA, NA, NA  
"25130", "SERPINB11", 0, NA, NA, NA, NA, NA  
"25131", "LINC01916", 0.224882870979587, 1.01003906181063, 3.3298372826098  
4, 0.303329855511435, 0.7616384958927, NA  
"25132", "CDH19", 0.681874263021344, -1.71328106138963, 1.93685096261729, -  
0.884570415823036, 0.376388368550463, NA  
"25133", "AC026585.1", 0, NA, NA, NA, NA, NA  
"25134", "AC006273.1", 0.165319271277154, -0.774663427007578, 3.3524751975  
3738, -0.231072082972193, 0.817258802814835, NA  
"25135", "TMPRSS9", 0, NA, NA, NA, NA, NA  
"25136", "AC011498.2", 0, NA, NA, NA, NA, NA  
"25137", "ACER1", 0.375307454000825, -1.51672328914404, 2.50822563158042, -  
0.604699700875141, 0.545378546938903, NA  
"25138", "AC130469.1", 0.337572635416734, -0.264596406747081, 2.5942306538  
205, -0.101994171704591, 0.918761301265062, NA  
"25139", "AC008734.2", 0.0534622507802646, -0.0533240139618838, 3.35247519  
753738, -0.015905863822961, 0.987309491940711, NA  
"25140", "OR7D2", 1.14400445445844, -2.35191346028361, 1.92259226878441, -1  
.2233032965282, 0.22121516253398, NA  
"25141", "BEST2", 0, NA, NA, NA, NA, NA  
"25142", "THSD8", 0, NA, NA, NA, NA, NA  
"25143", "OR10H1", 0.0644961186387932, -0.0533240139618838, 3.352475197537  
38, -0.015905863822961, 0.987309491940711, NA  
"25144", "CALR3", 0.128992237277586, 0.513744972953418, 3.34245151459318, 0  
.153703044220807, 0.877843884367224, NA  
"25145", "AC011467.1", 0, NA, NA, NA, NA, NA  
"25146", "AC011503.1", 0, NA, NA, NA, NA, NA  
"25147", "ZNF536", 0, NA, NA, NA, NA, NA  
"25148", "AC020912.1", 0.102230937222884, -1.35173207482145, 3.35247519753  
738, -0.403204198442509, 0.686798011343181, NA  
"25149", "GAPDHS", 0, NA, NA, NA, NA, NA  
"25150", "IGSF23", 0, NA, NA, NA, NA, NA  
"25151", "IGFL2", 0, NA, NA, NA, NA, NA  
"25152", "AC093503.1", 0.311386376006298, -0.943015833263308, 3.1147723279  
7951, -0.302755942960051, 0.762075860929422, NA  
"25153", "AC018755.4", 0.361734361109198, -0.774668275573776, 2.9064903221  
0001, -0.266530485129591, 0.789830684487713, NA  
"25154", "SIGLEC14", 0.368373361138399, -1.79010721085739, 2.4899692353949  
7, -0.718927441114921, 0.472185627692503, NA  
"25155", "DPRX", 0.100823152638361, -1.35173207482145, 3.35247519753738, -0  
.40320419844251, 0.686798011343181, NA  
"25156", "PRKCG", 0, NA, NA, NA, NA, NA  
"25157", "AC006116.9", 0.166727055861678, -0.774663427007578, 3.3524751975  
3738, -0.231072082972193, 0.817258802814835, NA

"25158", "ZSCAN1", 0, NA, NA, NA, NA, NA  
"25159", "NKX2-2", 0.128992237277586, 0.513744972953418, 3.34245151459318, 0.153703044220807, 0.877843884367224, NA  
"25160", "LINC00656", 0, NA, NA, NA, NA, NA  
"25161", "AL096677.2", 0, NA, NA, NA, NA, NA  
"25162", "AL121894.3", 0.117958369419058, 0.451348601316665, 3.34428110054629, 0.134961322851401, 0.892642454377335, NA  
"25163", "SYNDIG1", 0.286523607021433, -0.265776410372375, 2.71200358897697, -0.0980000216270479, 0.921932276195533, NA  
"25164", "FAM83C-AS1", 0, NA, NA, NA, NA, NA  
"25165", "AL391095.3", 0, NA, NA, NA, NA, NA  
"25166", "LINC01754", 0, NA, NA, NA, NA, NA  
"25167", "TRERNA1", 0, NA, NA, NA, NA, NA  
"25168", "KCNQ2", 0, NA, NA, NA, NA, NA  
"25169", "AP003900.1", 0, NA, NA, NA, NA, NA  
"25170", "AF127936.1", 0.100823152638361, -1.35173207482145, 3.35247519753738, -0.40320419844251, 0.686798011343181, NA  
"25171", "LINC01673", 0, NA, NA, NA, NA, NA  
"25172", "LINC01423", 0.38000101833847, 0.00408897427824591, 2.93388123827689, 0.00139370817908342, 0.998887982121646, NA  
"25173", "AP001471.1", 0.106924501560529, 0.385965786494404, 3.34626872025989, 0.115342137395477, 0.908173940404949, NA  
"25174", "LINC00895", 0, NA, NA, NA, NA, NA  
"25175", "F0393418.1", 0, NA, NA, NA, NA, NA  
"25176", "SOX10", 0, NA, NA, NA, NA, NA  
"25177", "AL022318.5", 0, NA, NA, NA, NA, NA  
"25178", "AL008718.2", 0.142120095111522, -0.0533240139618842, 3.35247519753738, -0.0159058638229611, 0.987309491940711, NA  
"25179", "Z84468.2", 0.0644961186387932, -0.0533240139618838, 3.35247519753738, -0.015905863822961, 0.987309491940711, NA  
"25180", "CR559946.2", 0.0644961186387932, -0.0533240139618838, 3.35247519753738, -0.015905863822961, 0.987309491940711, NA  
"25181", "LINC01203", 0.642282621856597, -3.2013083079928, 2.10986815160421, -1.51730254118426, 0.129190316924137, NA  
"25182", "MAGEB2", 0.0644961186387932, -0.0533240139618838, 3.35247519753738, -0.015905863822961, 0.987309491940711, NA  
"25183", "AC092198.1", 0, NA, NA, NA, NA, NA  
"25184", "ERAS", 0.0644961186387932, -0.0533240139618838, 3.35247519753738, -0.015905863822961, 0.987309491940711, NA  
"25185", "XAGE2", 0.367002966091109, 1.53852454259806, 2.49011214401207, 0.617853515673069, 0.536671903035855, NA  
"25186", "FAM156B", 0, NA, NA, NA, NA, NA  
"25187", "PFKFB1", 0, NA, NA, NA, NA, NA  
"25188", "NLRP2B", 0.128992237277586, 0.513744972953418, 3.34245151459318, 0.153703044220807, 0.877843884367224, NA  
"25189", "AL139398.1", 0, NA, NA, NA, NA, NA  
"25190", "TBX22", 0.233061356241168, -0.774663445836492, 3.35085807648355, -0.231183603767975, 0.817172167312465, NA  
"25191", "PABPC5-AS1", 0, NA, NA, NA, NA, NA  
"25192", "AMMECR1-IT1", 0, NA, NA, NA, NA, NA



"25193", "LHFPL1", 0.168565237602375, -1.35173207482145, 3.35247519753738, -0.40320419844251, 0.686798011343181, NA  
"25194", "AGTR2", 0.0644961186387932, -0.0533240139618838, 3.35247519753738, -0.015905863822961, 0.987309491940711, NA  
"25195", "KIAA1210", 0, NA, NA, NA, NA, NA  
"25196", "DCAF12L1", 1.03148620409705, -1.0280609548291, 1.44529175305507, -0.711317249722057, 0.476887664629031, NA  
"25197", "FGF13-AS1", 0, NA, NA, NA, NA, NA  
"25198", "SOX3", 0.244351032334407, -0.774664026145693, 3.30062972833046, -0.234701887187309, 0.814440122883676, NA  
"25199", "BX546450.2", 0, NA, NA, NA, NA, NA  
"25200", "AC007325.1", 0.0644961186387932, -0.0533240139618838, 3.35247519753738, -0.015905863822961, 0.987309491940711, NA  
"25201", "TTLL10-AS1", 0, NA, NA, NA, NA, NA  
"25202", "CAMTA1-IT1", 0, NA, NA, NA, NA, NA  
"25203", "KLHDC7A", 0, NA, NA, NA, NA, NA  
"25204", "AL391650.1", 0, NA, NA, NA, NA, NA  
"25205", "LINC01738", 0, NA, NA, NA, NA, NA  
"25206", "PCSK9", 0.0534622507802646, -0.0533240139618838, 3.35247519753738, -0.015905863822961, 0.987309491940711, NA  
"25207", "FOX D3", 0.249044596672051, 0.88628321168114, 3.27462607355989, 0.270651729929472, 0.786658905412859, NA  
"25208", "AL445205.1", 0.0534622507802646, -0.0533240139618838, 3.35247519753738, -0.015905863822961, 0.987309491940711, NA  
"25209", "ST6GALNAC5", 0, NA, NA, NA, NA, NA  
"25210", "AC117944.1", 0, NA, NA, NA, NA, NA  
"25211", "CLCA4", 0, NA, NA, NA, NA, NA  
"25212", "AC095033.1", 0, NA, NA, NA, NA, NA  
"25213", "AL355388.1", 0, NA, NA, NA, NA, NA  
"25214", "OR10K1", 0, NA, NA, NA, NA, NA  
"25215", "AL031726.2", 0, NA, NA, NA, NA, NA  
"25216", "Z97198.1", 0.0534622507802646, -0.0533240139618838, 3.35247519753738, -0.015905863822961, 0.987309491940711, NA  
"25217", "AL137800.1", 0.168565237602375, -1.35173207482145, 3.35247519753738, -0.40320419844251, 0.686798011343181, NA  
"25218", "AC119673.2", 0, NA, NA, NA, NA, NA  
"25219", "AC244035.4", 0, NA, NA, NA, NA, NA  
"25220", "C1orf143", 0.0534622507802646, -0.0533240139618838, 3.35247519753738, -0.015905863822961, 0.987309491940711, NA  
"25221", "AL161640.3", 0.0534622507802646, -0.0533240139618838, 3.35247519753738, -0.015905863822961, 0.987309491940711, NA  
"25222", "FAM166C", 0, NA, NA, NA, NA, NA  
"25223", "AC009236.2", 0.106924501560529, 0.385965786494404, 3.34626872025989, 0.115342137395477, 0.908173940404949, NA  
"25224", "AC118345.1", 0.0534622507802646, -0.0533240139618838, 3.35247519753738, -0.015905863822961, 0.987309491940711, NA  
"25225", "REG1A", 0.320773504681588, 1.40786461485746, 3.31359996416696, 0.424874646934456, 0.670928057520748, NA  
"25226", "FABP1", 0, NA, NA, NA, NA, NA  
"25227", "IGKV1-12", 0, NA, NA, NA, NA, NA

"25228", "IGKV1D-12", 0, NA, NA, NA, NA, NA  
"25229", "FOXDL1", 0, NA, NA, NA, NA, NA  
"25230", "AC009312.1", 0.261209904979155, -0.00458555259217486, 3.29716284  
438065, -0.00139075708680571, 0.99889033675033, NA  
"25231", "AC012668.3", 0, NA, NA, NA, NA, NA  
"25232", "AC073321.1", 0.308570806837251, -0.932162919412784, 3.1236495122  
9485, -0.298421098700012, 0.765381787833686, NA  
"25233", "IHH", 0, NA, NA, NA, NA, NA  
"25234", "C2orf72", 0, NA, NA, NA, NA, NA  
"25235", "PRSS56", 0, NA, NA, NA, NA, NA  
"25236", "MAB21L4", 0, NA, NA, NA, NA, NA  
"25237", "SRGAP3-  
AS4", 0.142120095111522, -0.0533240139618842, 3.35247519753738, -0.0159058  
638229611, 0.987309491940711, NA  
"25238", "AC090952.2", 0, NA, NA, NA, NA, NA  
"25239", "DAZL", 0, NA, NA, NA, NA, NA  
"25240", "AC141002.1", 0, NA, NA, NA, NA, NA  
"25241", "SLC38A3", 0, NA, NA, NA, NA, NA  
"25242", "LINC00973", 0.0534622507802646, -0.0533240139618838, 3.352475197  
53738, -0.015905863822961, 0.987309491940711, NA  
"25243", "AC079382.2", 0.0534622507802646, -0.0533240139618838, 3.35247519  
753738, -0.015905863822961, 0.987309491940711, NA  
"25244", "AC092468.1", 0, NA, NA, NA, NA, NA  
"25245", "AC092902.2", 0.0534622507802646, -0.0533240139618838, 3.35247519  
753738, -0.015905863822961, 0.987309491940711, NA  
"25246", "AC133681.1", 0, NA, NA, NA, NA, NA  
"25247", "RH0", 0.0534622507802646, -0.0533240139618838, 3.35247519753738,  
-0.015905863822961, 0.987309491940711, NA  
"25248", "CPNE4", 0, NA, NA, NA, NA, NA  
"25249", "SLC2A2", 0.106924501560529, 0.385965786494404, 3.34626872025989,  
0.115342137395477, 0.908173940404949, NA  
"25250", "AC026355.3", 0, NA, NA, NA, NA, NA  
"25251", "AC090425.2", 0, NA, NA, NA, NA, NA  
"25252", "AC073848.1", 0, NA, NA, NA, NA, NA  
"25253", "AC097512.1", 0, NA, NA, NA, NA, NA  
"25254", "AC079772.1", 0.0534622507802646, -0.0533240139618838, 3.35247519  
753738, -0.015905863822961, 0.987309491940711, NA  
"25255", "NWD2", 0, NA, NA, NA, NA, NA  
"25256", "ZAR1", 0, NA, NA, NA, NA, NA  
"25257", "AC111197.1", 0, NA, NA, NA, NA, NA  
"25258", "AC034139.1", 0, NA, NA, NA, NA, NA  
"25259", "LINC02435", 0.0534622507802646, -0.0533240139618838, 3.352475197  
53738, -0.015905863822961, 0.987309491940711, NA  
"25260", "AC079380.1", 0, NA, NA, NA, NA, NA  
"25261", "LINC00500", 0, NA, NA, NA, NA, NA  
"25262", "AC112236.3", 0, NA, NA, NA, NA, NA  
"25263", "AC098679.5", 0, NA, NA, NA, NA, NA  
"25264", "LINC02275", 0, NA, NA, NA, NA, NA  
"25265", "AC012055.1", 0.311386376006298, -0.943015833263308, 3.1147723279  
7951, -0.302755942960051, 0.762075860929422, NA

"25266", "AC097518.1", 0, NA, NA, NA, NA, NA  
"25267", "LINC01511", 0, NA, NA, NA, NA, NA  
"25268", "AC010451.3", 0, NA, NA, NA, NA, NA  
"25269", "LINC01020", 0, NA, NA, NA, NA, NA  
"25270", "AC091889.1", 0, NA, NA, NA, NA, NA  
"25271", "AC025754.2", 0.0534622507802646, -0.0533240139618838, 3.35247519  
753738, -0.015905863822961, 0.987309491940711, NA  
"25272", "GDNF-  
AS1", 0.100823152638361, -1.35173207482145, 3.35247519753738, -0.403204198  
44251, 0.686798011343181, NA  
"25273", "DDX4", 0, NA, NA, NA, NA, NA  
"25274", "LINC01950", 0, NA, NA, NA, NA, NA  
"25275", "SLC27A6", 0.370211542879096, -2.53866757706578, 2.85090778608902  
, -0.890476917371089, 0.373209857351095, NA  
"25276", "AC008679.1", 0, NA, NA, NA, NA, NA  
"25277", "AC010307.3", 0, NA, NA, NA, NA, NA  
"25278", "AC109454.3", 0, NA, NA, NA, NA, NA  
"25279", "IL17B", 0.168565237602375, -1.35173207482145, 3.35247519753738, -  
0.40320419844251, 0.686798011343181, NA  
"25280", "LINC01932", 0, NA, NA, NA, NA, NA  
"25281", "RASGEF1C", 0.102230937222884, -1.35173207482145, 3.3524751975373  
8, -0.403204198442509, 0.686798011343181, NA  
"25282", "LINC01622", 0.0534622507802646, -0.0533240139618838, 3.352475197  
53738, -0.015905863822961, 0.987309491940711, NA  
"25283", "AL022724.2", 0, NA, NA, NA, NA, NA  
"25284", "AL158198.1", 0.0534622507802646, -0.0533240139618838, 3.35247519  
753738, -0.015905863822961, 0.987309491940711, NA  
"25285", "SCGN", 0, NA, NA, NA, NA, NA  
"25286", "AL021917.1", 0, NA, NA, NA, NA, NA  
"25287", "BTN1A1", 0, NA, NA, NA, NA, NA  
"25288", "AL671883.3", 0.154285403418625, -0.774663427007578, 3.3524751975  
3738, -0.231072082972193, 0.817258802814835, NA  
"25289", "SMIM40", 0.674827218208337, -0.83172139565141, 2.19446153293857,  
-0.37900933015566, 0.704680935379437, NA  
"25290", "SPATS1", 0, NA, NA, NA, NA, NA  
"25291", "AL512422.1", 0.154285403418625, -0.774663427007578, 3.3524751975  
3738, -0.231072082972193, 0.817258802814835, NA  
"25292", "AL445465.2", 0, NA, NA, NA, NA, NA  
"25293", "TBX18-AS1", 0, NA, NA, NA, NA, NA  
"25294", "POPDC3", 0.100823152638361, -1.35173207482145, 3.35247519753738,  
-0.40320419844251, 0.686798011343181, NA  
"25295", "AL591518.1", 0, NA, NA, NA, NA, NA  
"25296", "Z99496.2", 0, NA, NA, NA, NA, NA  
"25297", "AL050338.2", 0.100823152638361, -1.35173207482145, 3.35247519753  
738, -0.40320419844251, 0.686798011343181, NA  
"25298", "AL031121.2", 0, NA, NA, NA, NA, NA  
"25299", "HGC6.3", 0, NA, NA, NA, NA, NA  
"25300", "AC073316.2", 0.22202748838264, -0.774663427007578, 3.35247519753  
738, -0.231072082972193, 0.817258802814835, NA  
"25301", "AC005019.2", 0, NA, NA, NA, NA, NA

"25302", "KIAA0087", 0, NA, NA, NA, NA, NA  
"25303", "AC009262.1", 0, NA, NA, NA, NA, NA  
"25304", "AC083864.2", 0, NA, NA, NA, NA, NA  
"25305", "AC007349.4", 0, NA, NA, NA, NA, NA  
"25306", "CDC14C", 0, NA, NA, NA, NA, NA  
"25307", "AC074183.1", 0.0534622507802646, -0.0533240139618838, 3.35247519  
753738, -0.015905863822961, 0.987309491940711, NA  
"25308", "DLX6", 0, NA, NA, NA, NA, NA  
"25309", "AC092849.2", 0, NA, NA, NA, NA, NA  
"25310", "LINC02577", 0, NA, NA, NA, NA, NA  
"25311", "AC003084.1", 0, NA, NA, NA, NA, NA  
"25312", "TRBV7-6", 0, NA, NA, NA, NA, NA  
"25313", "PIP", 0, NA, NA, NA, NA, NA  
"25314", "AC073111.1", 0, NA, NA, NA, NA, NA  
"25315", "DEFA5", 0, NA, NA, NA, NA, NA  
"25316", "AC011008.1", 0, NA, NA, NA, NA, NA  
"25317", "SLC18A1", 0, NA, NA, NA, NA, NA  
"25318", "LGI3", 0, NA, NA, NA, NA, NA  
"25319", "LINC01605", 0.100823152638361, -1.35173207482145, 3.352475197537  
38, -0.40320419844251, 0.686798011343181, NA  
"25320", "NKX6-3", 0, NA, NA, NA, NA, NA  
"25321", "ODF1", 0.0534622507802646, -0.0533240139618838, 3.35247519753738  
, -0.015905863822961, 0.987309491940711, NA  
"25322", "BAALC-  
AS2", 0.0534622507802646, -0.0533240139618838, 3.35247519753738, -0.015905  
863822961, 0.987309491940711, NA  
"25323", "AF178030.1", 0.106924501560529, 0.385965786494404, 3.34626872025  
989, 0.115342137395477, 0.908173940404949, NA  
"25324", "FER1L6-AS2", 0, NA, NA, NA, NA, NA  
"25325", "ADCY8", 0.219614265997676, -1.35173207482145, 3.35247519753738, -  
0.40320419844251, 0.686798011343181, NA  
"25326", "LY6H", 0, NA, NA, NA, NA, NA  
"25327", "DMRT1", 0, NA, NA, NA, NA, NA  
"25328", "IGFBPL1", 0.0534622507802646, -0.0533240139618838, 3.35247519753  
738, -0.015905863822961, 0.987309491940711, NA  
"25329", "AL158828.1", 0.100823152638361, -1.35173207482145, 3.35247519753  
738, -0.40320419844251, 0.686798011343181, NA  
"25330", "AL359632.1", 0, NA, NA, NA, NA, NA  
"25331", "AL161785.2", 0, NA, NA, NA, NA, NA  
"25332", "AL669970.1", 0.0534622507802646, -0.0533240139618838, 3.35247519  
753738, -0.015905863822961, 0.987309491940711, NA  
"25333", "PTF1A", 0.160386752340794, 0.715986771710925, 3.33695183420161, 0  
.214563112470645, 0.830107956063492, NA  
"25334", "LINC02652", 0.0534622507802646, -0.0533240139618838, 3.352475197  
53738, -0.015905863822961, 0.987309491940711, NA  
"25335", "LINC02629", 0, NA, NA, NA, NA, NA  
"25336", "FAM170B", 0, NA, NA, NA, NA, NA  
"25337", "DRGX", 0, NA, NA, NA, NA, NA  
"25338", "MYPN", 0.168565237602375, -1.35173207482145, 3.35247519753738, -0  
.40320419844251, 0.686798011343181, NA

"25339", "AC012560.1", 0, NA, NA, NA, NA, NA  
"25340", "DNTT", 0, NA, NA, NA, NA, NA  
"25341", "LINC02620", 0, NA, NA, NA, NA, NA  
"25342", "HABP2", 0.168565237602375, -1.35173207482145, 3.35247519753738, -  
0.40320419844251, 0.686798011343181, NA  
"25343", "LINC02674", 0.102230937222884, -1.35173207482145, 3.352475197537  
38, -0.403204198442509, 0.686798011343181, NA  
"25344", "LINC00867", 0.219614265997676, -1.35173207482145, 3.352475197537  
38, -0.40320419844251, 0.686798011343181, NA  
"25345", "TEX36", 0.0534622507802646, -0.0533240139618838, 3.3524751975373  
8, -0.015905863822961, 0.987309491940711, NA  
"25346", "AL158835.1", 0.102230937222884, -1.35173207482145, 3.35247519753  
738, -0.403204198442509, 0.686798011343181, NA  
"25347", "CLRN3", 0.0534622507802646, -0.0533240139618838, 3.3524751975373  
8, -0.015905863822961, 0.987309491940711, NA  
"25348", "LINC01219", 0, NA, NA, NA, NA, NA  
"25349", "AC080023.1", 0.0534622507802646, -0.0533240139618838, 3.35247519  
753738, -0.015905863822961, 0.987309491940711, NA  
"25350", "LINC02683", 0, NA, NA, NA, NA, NA  
"25351", "AC090692.2", 0, NA, NA, NA, NA, NA  
"25352", "LINC02735", 0.160386752340794, 0.715986771710925, 3.336951834201  
61, 0.214563112470645, 0.830107956063492, NA  
"25353", "AP000777.1", 0, NA, NA, NA, NA, NA  
"25354", "TMEM151A", 0.0534622507802646, -0.0533240139618838, 3.3524751975  
3738, -0.015905863822961, 0.987309491940711, NA  
"25355", "AP003071.3", 0, NA, NA, NA, NA, NA  
"25356", "TYR", 0, NA, NA, NA, NA, NA  
"25357", "FOXR1", 0, NA, NA, NA, NA, NA  
"25358", "AP000821.1", 0.0534622507802646, -0.0533240139618838, 3.35247519  
753738, -0.015905863822961, 0.987309491940711, NA  
"25359", "AP001122.1", 0.102230937222884, -1.35173207482145, 3.35247519753  
738, -0.403204198442509, 0.686798011343181, NA  
"25360", "GAU1", 0, NA, NA, NA, NA, NA  
"25361", "SLC15A5", 0.0534622507802646, -0.0533240139618838, 3.35247519753  
738, -0.015905863822961, 0.987309491940711, NA  
"25362", "AC024901.1", 0.168565237602375, -1.35173207482145, 3.35247519753  
738, -0.40320419844251, 0.686798011343181, NA  
"25363", "AC025031.2", 0.0534622507802646, -0.0533240139618838, 3.35247519  
753738, -0.015905863822961, 0.987309491940711, NA  
"25364", "LACRT", 0, NA, NA, NA, NA, NA  
"25365", "AC020637.1", 0.20774765419889, -0.335374473295219, 3.34626863491  
525, -0.10022341595528, 0.920166956363588, NA  
"25366", "LINC02464", 0, NA, NA, NA, NA, NA  
"25367", "PPFIA2-AS1", 0, NA, NA, NA, NA, NA  
"25368", "STAB2", 0, NA, NA, NA, NA, NA  
"25369", "AC126177.3", 0, NA, NA, NA, NA, NA  
"25370", "AC078880.5", 0, NA, NA, NA, NA, NA  
"25371", "AC084880.4", 0.0534622507802646, -0.0533240139618838, 3.35247519  
753738, -0.015905863822961, 0.987309491940711, NA  
"25372", "AC006065.4", 0, NA, NA, NA, NA, NA

"25373", "AC137590.2", 0, NA, NA, NA, NA, NA  
"25374", "AL137001.2", 0, NA, NA, NA, NA, NA  
"25375", "AL512652.1", 0, NA, NA, NA, NA, NA  
"25376", "LINC01046", 0, NA, NA, NA, NA, NA  
"25377", "ATP12A", 0, NA, NA, NA, NA, NA  
"25378", "LINC02340", 0, NA, NA, NA, NA, NA  
"25379", "AL162713.2", 0.0534622507802646, -0.0533240139618838, 3.35247519753738, -0.015905863822961, 0.987309491940711, NA  
"25380", "AL158195.1", 0, NA, NA, NA, NA, NA  
"25381", "AL138689.1", 0.302469457915082, -2.33550018378661, 3.3206786067292, -0.703320152409159, 0.481856254557762, NA  
"25382", "F10-AS1", 0.0534622507802646, -0.0533240139618838, 3.35247519753738, -0.015905863822961, 0.987309491940711, NA  
"25383", "GRTP1-AS1", 0, NA, NA, NA, NA, NA  
"25384", "LINC01297", 0, NA, NA, NA, NA, NA  
"25385", "AL445363.1", 0.106924501560529, 0.385965786494404, 3.34626872025989, 0.115342137395477, 0.908173940404949, NA  
"25386", "AL161752.1", 0, NA, NA, NA, NA, NA  
"25387", "ABHD12B", 0, NA, NA, NA, NA, NA  
"25388", "AL121768.1", 0.106924501560529, 0.385965786494404, 3.34626872025989, 0.115342137395477, 0.908173940404949, NA  
"25389", "CHGA", 0.100823152638361, -1.35173207482145, 3.35247519753738, -0.40320419844251, 0.686798011343181, NA  
"25390", "SERPINA10", 0, NA, NA, NA, NA, NA  
"25391", "AL133467.2", 0.102230937222884, -1.35173207482145, 3.35247519753738, -0.403204198442509, 0.686798011343181, NA  
"25392", "IGHV2-70D", 0, NA, NA, NA, NA, NA  
"25393", "IGHV3-72", 0, NA, NA, NA, NA, NA  
"25394", "LINC02853", 0, NA, NA, NA, NA, NA  
"25395", "AC087516.1", 0, NA, NA, NA, NA, NA  
"25396", "TGM7", 0, NA, NA, NA, NA, NA  
"25397", "UNC13C", 0, NA, NA, NA, NA, NA  
"25398", "HIGD2B", 0, NA, NA, NA, NA, NA  
"25399", "GOLGA6A", 0.275489739162904, -0.333877366261583, 3.20869724067456, -0.104053870221608, 0.917126598293383, NA  
"25400", "CYP1A1", 0, NA, NA, NA, NA, NA  
"25401", "AC022523.1", 0, NA, NA, NA, NA, NA  
"25402", "PGPEP1L", 0.0534622507802646, -0.0533240139618838, 3.35247519753738, -0.015905863822961, 0.987309491940711, NA  
"25403", "AC015712.4", 0.22202748838264, -0.774663427007578, 3.35247519753738, -0.231072082972193, 0.817258802814835, NA  
"25404", "AC106820.5", 0, NA, NA, NA, NA, NA  
"25405", "ZG16", 0, NA, NA, NA, NA, NA  
"25406", "C16orf78", 0.106924501560529, 0.385965786494404, 3.34626872025989, 0.115342137395477, 0.908173940404949, NA  
"25407", "AC018553.3", 0.471034695517457, -2.86208444229969, 2.63886005633485, -1.08459121787416, 0.278102746365447, NA  
"25408", "CES5A", 0.0534622507802646, -0.0533240139618838, 3.35247519753738, -0.015905863822961, 0.987309491940711, NA

"25409", "AC009097.2", 0, NA, NA, NA, NA, NA  
"25410", "AC092723.4", 0, NA, NA, NA, NA, NA  
"25411", "PABPN1L", 0, NA, NA, NA, NA, NA  
"25412", "AC090617.2", 0, NA, NA, NA, NA, NA  
"25413", "AC005277.1", 0, NA, NA, NA, NA, NA  
"25414", "TBC1D26", 0.0534622507802646, -0.0533240139618838, 3.35247519753  
738, -0.015905863822961, 0.987309491940711, NA  
"25415", "AC015726.2", 0, NA, NA, NA, NA, NA  
"25416", "ABHD15-AS1", 0, NA, NA, NA, NA, NA  
"25417", "AC104564.1", 0, NA, NA, NA, NA, NA  
"25418", "AC079336.4", 0, NA, NA, NA, NA, NA  
"25419", "PPP1R1B", 0.269388390240736, -2.09481427187859, 3.17548848369632  
, -0.659682528415343, 0.509457580965155, NA  
"25420", "AC099811.3", 0.100823152638361, -1.35173207482145, 3.35247519753  
738, -0.40320419844251, 0.686798011343181, NA  
"25421", "AC005670.1", 0, NA, NA, NA, NA, NA  
"25422", "AC015813.4", 0.102230937222884, -1.35173207482145, 3.35247519753  
738, -0.403204198442509, 0.686798011343181, NA  
"25423", "AC005208.1", 0.0534622507802646, -0.0533240139618838, 3.35247519  
753738, -0.015905863822961, 0.987309491940711, NA  
"25424", "LINC02003", 0, NA, NA, NA, NA, NA  
"25425", "CLUL1", 0, NA, NA, NA, NA, NA  
"25426", "AP005202.1", 0.106924501560529, 0.385965786494404, 3.34626872025  
989, 0.115342137395477, 0.908173940404949, NA  
"25427", "AP005264.1", 0, NA, NA, NA, NA, NA  
"25428", "AC022809.1", 0.154285403418625, -0.774663427007578, 3.3524751975  
3738, -0.231072082972193, 0.817258802814835, NA  
"25429", "PCAT18", 0, NA, NA, NA, NA, NA  
"25430", "AC090403.1", 0, NA, NA, NA, NA, NA  
"25431", "AC084335.1", 0, NA, NA, NA, NA, NA  
"25432", "RIT2", 0, NA, NA, NA, NA, NA  
"25433", "SYT4", 0, NA, NA, NA, NA, NA  
"25434", "AC016866.1", 0, NA, NA, NA, NA, NA  
"25435", "AC104971.3", 0, NA, NA, NA, NA, NA  
"25436", "LINC01926", 0, NA, NA, NA, NA, NA  
"25437", "AC090409.2", 0.0534622507802646, -0.0533240139618838, 3.35247519  
753738, -0.015905863822961, 0.987309491940711, NA  
"25438", "SERPINB4", 0, NA, NA, NA, NA, NA  
"25439", "AC103808.5", 0, NA, NA, NA, NA, NA  
"25440", "MISP", 0.456754861333707, -2.11038026354423, 2.74074978099796, -0  
.770001069844399, 0.441299258065086, NA  
"25441", "EFNA2", 0, NA, NA, NA, NA, NA  
"25442", "AC008752.1", 0, NA, NA, NA, NA, NA  
"25443", "AC007787.1", 0, NA, NA, NA, NA, NA  
"25444", "AC008991.1", 0, NA, NA, NA, NA, NA  
"25445", "LINC01834", 0, NA, NA, NA, NA, NA  
"25446", "UPK1A", 0, NA, NA, NA, NA, NA  
"25447", "CYP2A7", 0.106924501560529, 0.385965786494404, 3.34626872025989,  
0.115342137395477, 0.908173940404949, NA  
"25448", "PSG8-AS1", 0, NA, NA, NA, NA, NA

"25449", "AC004784.1", 0, NA, NA, NA, NA, NA  
"25450", "LINC01872", 0, NA, NA, NA, NA, NA  
"25451", "MIMT1", 0.160386752340794, 0.715986771710925, 3.33695183420161, 0.214563112470645, 0.830107956063492, NA  
"25452", "SNAP25-  
AS1", 0.0534622507802646, -0.0533240139618838, 3.35247519753738, -0.015905863822961, 0.987309491940711, NA  
"25453", "AL354824.1", 0.142120095111522, -0.0533240139618842, 3.35247519753738, -0.015905863822961, 0.987309491940711, NA  
"25454", "AL158175.1", 0, NA, NA, NA, NA, NA  
"25455", "JPH2", 0, NA, NA, NA, NA, NA  
"25456", "AC005220.1", 0, NA, NA, NA, NA, NA  
"25457", "KCNE1B", 0, NA, NA, NA, NA, NA  
"25458", "CR381670.2", 0.106924501560529, 0.385965786494404, 3.34626872025989, 0.115342137395477, 0.908173940404949, NA  
"25459", "AP000322.2", 0.0534622507802646, -0.0533240139618838, 3.35247519753738, -0.015905863822961, 0.987309491940711, NA  
"25460", "IGLV11-55", 0, NA, NA, NA, NA, NA  
"25461", "IGLV3-19", 0.269388390240736, -2.09481427187859, 3.17548848369632, -0.659682528415343, 0.509457580965155, NA  
"25462", "IGLV3-10", 0, NA, NA, NA, NA, NA  
"25463", "CACNG2", 0, NA, NA, NA, NA, NA  
"25464", "GALR3", 0.100823152638361, -1.35173207482145, 3.35247519753738, -0.40320419844251, 0.686798011343181, NA  
"25465", "LINC00634", 0, NA, NA, NA, NA, NA  
"25466", "AL683807.2", 0.0534622507802646, -0.0533240139618838, 3.35247519753738, -0.015905863822961, 0.987309491940711, NA  
"25467", "LINC01546", 0, NA, NA, NA, NA, NA  
"25468", "VCX3A", 0, NA, NA, NA, NA, NA  
"25469", "SHROOM2", 0.102230937222884, -1.35173207482145, 3.35247519753738, -0.403204198442509, 0.686798011343181, NA  
"25470", "SSX5", 0, NA, NA, NA, NA, NA  
"25471", "XAGE3", 0, NA, NA, NA, NA, NA  
"25472", "BX276092.9", 0, NA, NA, NA, NA, NA  
"25473", "H2BFM", 0.106924501560529, 0.385965786494404, 3.34626872025989, 0.115342137395477, 0.908173940404949, NA  
"25474", "AKAP14", 0.142120095111522, -0.0533240139618842, 3.35247519753738, -0.015905863822961, 0.987309491940711, NA  
"25475", "SAGE1", 0, NA, NA, NA, NA, NA  
"25476", "U52111.1", 0, NA, NA, NA, NA, NA  
"25477", "AL390719.3", 0.168565237602375, -1.35173207482145, 3.35247519753738, -0.40320419844251, 0.686798011343181, NA  
"25478", "SH2D5", 0, NA, NA, NA, NA, NA  
"25479", "GRHL3", 0, NA, NA, NA, NA, NA  
"25480", "AC093151.8", 1.29194910266449, 0.937079644072465, 2.3973634521363, 0.390879256642304, 0.695886487429955, NA  
"25481", "AC093151.3", 0.767842540831688, -2.67755194277475, 1.7932747926602, -1.49310744439941, 0.135409064191101, NA  
"25482", "LINC02792", 0, NA, NA, NA, NA, NA  
"25483", "AL596214.1", 0.142120095111522, -0.0533240139618842, 3.352475197



53738,-0.0159058638229611,0.987309491940711,NA  
"25484","PROK1",0,NA,NA,NA,NA,NA  
"25485","HIST2H2AA3",0,NA,NA,NA,NA,NA  
"25486","AL592078.1",0,NA,NA,NA,NA,NA  
"25487","AL365181.2",0,NA,NA,NA,NA,NA  
"25488","AL592295.3",0.102230937222884,-1.35173207482145,3.35247519753  
738,-0.403204198442509,0.686798011343181,NA  
"25489","MAEL",0,NA,NA,NA,NA,NA  
"25490","AL357793.1",0,NA,NA,NA,NA,NA  
"25491","AL596330.1",0,NA,NA,NA,NA,NA  
"25492","CAPN9",0,NA,NA,NA,NA,NA  
"25493","AL359551.1",0.168565237602375,-1.35173207482145,3.35247519753  
738,-0.40320419844251,0.686798011343181,NA  
"25494","LINC02774",0,NA,NA,NA,NA,NA  
"25495","DCDC2C",0.102230937222884,-1.35173207482145,3.35247519753738,  
-0.403204198442509,0.686798011343181,NA  
"25496","AC080162.1",0.142120095111522,-0.0533240139618842,3.352475197  
53738,-0.0159058638229611,0.987309491940711,NA  
"25497","BIRC6-AS1",0,NA,NA,NA,NA,NA  
"25498","IGKV1-16",0,NA,NA,NA,NA,NA  
"25499","IGKV1D-17",0,NA,NA,NA,NA,NA  
"25500","AC092683.2",0,NA,NA,NA,NA,NA  
"25501","AL078621.4",0,NA,NA,NA,NA,NA  
"25502","POTEE",0.142120095111522,-0.0533240139618842,3.35247519753738  
,-0.0159058638229611,0.987309491940711,NA  
"25503","AC009955.2",0,NA,NA,NA,NA,NA  
"25504","NGEF",0.741830870342717,-3.51198793592468,1.95519991386473,-1  
.79622958809502,0.0724580108602911,NA  
"25505","TRPM8",0,NA,NA,NA,NA,NA  
"25506","AC104667.2",0,NA,NA,NA,NA,NA  
"25507","CCK",0,NA,NA,NA,NA,NA  
"25508","AC006059.4",1.01078578858157,-2.24373776887181,1.747178091417  
6,-1.28420667583539,0.199069649970176,NA  
"25509","FAM3D",0.102230937222884,-1.35173207482145,3.35247519753738,-  
0.403204198442509,0.686798011343181,NA  
"25510","AC092894.1",0,NA,NA,NA,NA,NA  
"25511","BFSP2-AS1",0,NA,NA,NA,NA,NA  
"25512","LINC01209",0.142120095111522,-0.0533240139618842,3.3524751975  
3738,-0.0159058638229611,0.987309491940711,NA  
"25513","LINC02069",0,NA,NA,NA,NA,NA  
"25514","AC080129.2",0,NA,NA,NA,NA,NA  
"25515","FAM90A26",0.142120095111522,-0.0533240139618842,3.35247519753  
738,-0.0159058638229611,0.987309491940711,NA  
"25516","AC005674.1",0,NA,NA,NA,NA,NA  
"25517","AC097654.1",0,NA,NA,NA,NA,NA  
"25518","AC114757.1",0,NA,NA,NA,NA,NA  
"25519","GABRA4",0,NA,NA,NA,NA,NA  
"25520","THEGL",0.142120095111522,-0.0533240139618842,3.35247519753738  
,-0.0159058638229611,0.987309491940711,NA  
"25521","CSN1S1",0.201646305276721,-1.9490730241217,3.3359781915796,-0

.584258323103367,0.559046527482917,NA  
"25522","NPFFR2",0,NA,NA,NA,NA,NA  
"25523","AC114781.2",0,NA,NA,NA,NA,NA  
"25524","AC133530.1",0.142120095111522,-0.0533240139618842,3.352475197  
53738,-0.0159058638229611,0.987309491940711,NA  
"25525","AC097528.1",0,NA,NA,NA,NA,NA  
"25526","AC131956.2",0.201646305276721,-1.9490730241217,3.335978191579  
6,-0.584258323103367,0.559046527482917,NA  
"25527","AC093890.2",0,NA,NA,NA,NA,NA  
"25528","LINC01095",0,NA,NA,NA,NA,NA  
"25529","AC093297.1",0.142120095111522,-0.0533240139618842,3.352475197  
53738,-0.0159058638229611,0.987309491940711,NA  
"25530","LINC02106",0,NA,NA,NA,NA,NA  
"25531","AC113404.1",0,NA,NA,NA,NA,NA  
"25532","AC020930.1",0,NA,NA,NA,NA,NA  
"25533","AC114316.1",0,NA,NA,NA,NA,NA  
"25534","AC113349.1",0,NA,NA,NA,NA,NA  
"25535","IL3",0,NA,NA,NA,NA,NA  
"25536","AC005609.5",0,NA,NA,NA,NA,NA  
"25537","AC011373.1",0.142120095111522,-0.0533240139618842,3.352475197  
53738,-0.0159058638229611,0.987309491940711,NA  
"25538","AC022100.1",0,NA,NA,NA,NA,NA  
"25539","NSG2",0.142120095111522,-0.0533240139618842,3.35247519753738,  
-0.0159058638229611,0.987309491940711,NA  
"25540","DRD1",0,NA,NA,NA,NA,NA  
"25541","AL009179.3",0,NA,NA,NA,NA,NA  
"25542","ZFP57",0.100823152638361,-1.35173207482145,3.35247519753738,-  
0.40320419844251,0.686798011343181,NA  
"25543","RNF39",0,NA,NA,NA,NA,NA  
"25544","AL512283.2",0,NA,NA,NA,NA,NA  
"25545","AL032821.1",0,NA,NA,NA,NA,NA  
"25546","NMBR",0.102230937222884,-1.35173207482145,3.35247519753738,-0  
.403204198442509,0.686798011343181,NA  
"25547","TAB2-AS1",0,NA,NA,NA,NA,NA  
"25548","AL078582.1",0,NA,NA,NA,NA,NA  
"25549","VIP",0,NA,NA,NA,NA,NA  
"25550","TCP10L2",0,NA,NA,NA,NA,NA  
"25551","FRMD1",0.142120095111522,-0.0533240139618842,3.35247519753738  
, -0.0159058638229611,0.987309491940711,NA  
"25552","AC005082.2",0,NA,NA,NA,NA,NA  
"25553","LINC01449",0,NA,NA,NA,NA,NA  
"25554","HEPACAM2",0.142120095111522,-0.0533240139618842,3.35247519753  
738,-0.0159058638229611,0.987309491940711,NA  
"25555","GNGT1",0,NA,NA,NA,NA,NA  
"25556","DLX6-  
AS1",0.426360285334567,1.65695407184322,3.30080049096878,0.50198552635  
2398,0.615677702148379,NA  
"25557","AC018643.1",0.142120095111522,-0.0533240139618842,3.352475197  
53738,-0.0159058638229611,0.987309491940711,NA  
"25558","AC073878.2",0,NA,NA,NA,NA,NA

"25559", "TRBV10-1", 0, NA, NA, NA, NA, NA  
"25560", "TRBV10-3", 0, NA, NA, NA, NA, NA  
"25561", "TRBV12-3", 0, NA, NA, NA, NA, NA  
"25562", "TRPV5", 0, NA, NA, NA, NA, NA  
"25563", "OR2A25", 0, NA, NA, NA, NA, NA  
"25564", "AF131216.3", 0, NA, NA, NA, NA, NA  
"25565", "TEX15", 0, NA, NA, NA, NA, NA  
"25566", "AC084024.1", 0, NA, NA, NA, NA, NA  
"25567", "AC007991.2", 0, NA, NA, NA, NA, NA  
"25568", "AC068075.2", 0, NA, NA, NA, NA, NA  
"25569", "AC012213.4", 0, NA, NA, NA, NA, NA  
"25570", "AL449043.1", 0, NA, NA, NA, NA, NA  
"25571", "AL591222.1", 0, NA, NA, NA, NA, NA  
"25572", "AL163192.1", 0, NA, NA, NA, NA, NA  
"25573", "AL353608.2", 0, NA, NA, NA, NA, NA  
"25574", "AL354733.2", 0.142120095111522, -0.0533240139618842, 3.352475197  
53738, -0.0159058638229611, 0.987309491940711, NA  
"25575", "DIRAS2", 0, NA, NA, NA, NA, NA  
"25576", "AL137067.3", 0, NA, NA, NA, NA, NA  
"25577", "ADGRD2", 0, NA, NA, NA, NA, NA  
"25578", "TMEM210", 0, NA, NA, NA, NA, NA  
"25579", "AL732437.3", 0, NA, NA, NA, NA, NA  
"25580", "C10orf113", 0, NA, NA, NA, NA, NA  
"25581", "LINC00836", 0, NA, NA, NA, NA, NA  
"25582", "MY03A", 0, NA, NA, NA, NA, NA  
"25583", "AL353600.1", 0, NA, NA, NA, NA, NA  
"25584", "AL358394.1", 0, NA, NA, NA, NA, NA  
"25585", "ANTXRL", 0, NA, NA, NA, NA, NA  
"25586", "AC024597.1", 0, NA, NA, NA, NA, NA  
"25587", "AC067751.1", 0, NA, NA, NA, NA, NA  
"25588", "LINC02640", 0, NA, NA, NA, NA, NA  
"25589", "TBATA", 0, NA, NA, NA, NA, NA  
"25590", "RGR", 0, NA, NA, NA, NA, NA  
"25591", "CYP26C1", 0, NA, NA, NA, NA, NA  
"25592", "PAX2", 0, NA, NA, NA, NA, NA  
"25593", "AC010998.3", 0.346581969557291, -1.38612727586565, 2.96955222737  
921, -0.466779894654011, 0.640657361748092, NA  
"25594", "AC127526.2", 0, NA, NA, NA, NA, NA  
"25595", "ELF5", 0, NA, NA, NA, NA, NA  
"25596", "AC009656.1", 0, NA, NA, NA, NA, NA  
"25597", "OR5B12", 0.201646305276721, -1.9490730241217, 3.3359781915796, -0  
.584258323103367, 0.559046527482917, NA  
"25598", "C11orf86", 0, NA, NA, NA, NA, NA  
"25599", "AP000439.2", 0, NA, NA, NA, NA, NA  
"25600", "KRTAP5-11", 0, NA, NA, NA, NA, NA  
"25601", "MMP8", 0, NA, NA, NA, NA, NA  
"25602", "MMP12", 0, NA, NA, NA, NA, NA  
"25603", "AP000465.1", 0, NA, NA, NA, NA, NA  
"25604", "AC010185.1", 0, NA, NA, NA, NA, NA  
"25605", "AC026310.2", 0.100823152638361, -1.35173207482145, 3.35247519753

738,-0.40320419844251,0.686798011343181,NA  
"25606","LINC02471",0,NA,NA,NA,NA,NA  
"25607","AC090115.1",0.142120095111522,-0.0533240139618842,3.352475197  
53738,-0.0159058638229611,0.987309491940711,NA  
"25608","ANP32D",0,NA,NA,NA,NA,NA  
"25609","AC117498.1",0.142120095111522,-0.0533240139618842,3.352475197  
53738,-0.0159058638229611,0.987309491940711,NA  
"25610","MUCL1",0,NA,NA,NA,NA,NA  
"25611","TAC3",0,NA,NA,NA,NA,NA  
"25612","AC079035.1",0,NA,NA,NA,NA,NA  
"25613","C12orf56",0,NA,NA,NA,NA,NA  
"25614","AC078962.4",0,NA,NA,NA,NA,NA  
"25615","AC011595.2",0,NA,NA,NA,NA,NA  
"25616","AC026333.3",0,NA,NA,NA,NA,NA  
"25617","SMIM2-IT1",0,NA,NA,NA,NA,NA  
"25618","MLNR",0,NA,NA,NA,NA,NA  
"25619","CNMD",0,NA,NA,NA,NA,NA  
"25620","LINC00379",0,NA,NA,NA,NA,NA  
"25621","AL137246.1",0,NA,NA,NA,NA,NA  
"25622","AL355810.1",0,NA,NA,NA,NA,NA  
"25623","COL4A2-AS1",0,NA,NA,NA,NA,NA  
"25624","TRAV30",0,NA,NA,NA,NA,NA  
"25625","OR6J1",0,NA,NA,NA,NA,NA  
"25626","LINC02327",0.284240190223044,0.69583062743856,3.3374714942975  
1,0.208490358233014,0.834846110249776,NA  
"25627","INSM2",0.142120095111522,-0.0533240139618842,3.35247519753738  
,-0.0159058638229611,0.987309491940711,NA  
"25628","SFTA3",0.142120095111522,-0.0533240139618842,3.35247519753738  
,-0.0159058638229611,0.987309491940711,NA  
"25629","AL359233.1",0,NA,NA,NA,NA,NA  
"25630","AL392023.2",0,NA,NA,NA,NA,NA  
"25631","SSTR1",0,NA,NA,NA,NA,NA  
"25632","LINC02324",0,NA,NA,NA,NA,NA  
"25633","LRRC74A",0.142120095111522,-0.0533240139618842,3.352475197537  
38,-0.0159058638229611,0.987309491940711,NA  
"25634","AL133279.1",0,NA,NA,NA,NA,NA  
"25635","IGHV2-26",0,NA,NA,NA,NA,NA  
"25636","AC107980.1",0,NA,NA,NA,NA,NA  
"25637","TRPM1",0,NA,NA,NA,NA,NA  
"25638","GOLGA8K",0,NA,NA,NA,NA,NA  
"25639","PLCB2-AS1",0,NA,NA,NA,NA,NA  
"25640","AC051619.11",0.142120095111522,-0.0533240139618842,3.35247519  
753738,-0.0159058638229611,0.987309491940711,NA  
"25641","CTXN2",0,NA,NA,NA,NA,NA  
"25642","AC023906.4",0.100823152638361,-1.35173207482145,3.35247519753  
738,-0.40320419844251,0.686798011343181,NA  
"25643","LINC01169",0.100823152638361,-1.35173207482145,3.352475197537  
38,-0.40320419844251,0.686798011343181,NA  
"25644","RLBP1",0,NA,NA,NA,NA,NA  
"25645","IRAIN",0.284240190223044,0.69583062743856,3.33747149429751,0.

208490358233014,0.834846110249776,NA  
"25646","PRSS33",0,NA,NA,NA,NA,NA  
"25647","AC074051.5",0,NA,NA,NA,NA,NA  
"25648","AF001548.1",0,NA,NA,NA,NA,NA  
"25649","SULT1A4",0,NA,NA,NA,NA,NA  
"25650","AC009088.2",0,NA,NA,NA,NA,NA  
"25651","PYDC1",0,NA,NA,NA,NA,NA  
"25652","AC106793.1",0.142120095111522,-0.0533240139618842,3.352475197  
53738,-0.0159058638229611,0.987309491940711,NA  
"25653","AC040174.2",0.142120095111522,-0.0533240139618842,3.352475197  
53738,-0.0159058638229611,0.987309491940711,NA  
"25654","AC018557.2",0,NA,NA,NA,NA,NA  
"25655","AC092134.1",0,NA,NA,NA,NA,NA  
"25656","AC084064.1",0,NA,NA,NA,NA,NA  
"25657","AC010531.4",0,NA,NA,NA,NA,NA  
"25658","AC116914.2",0,NA,NA,NA,NA,NA  
"25659","SLC13A5",0,NA,NA,NA,NA,NA  
"25660","DHRS7C",0.102230937222884,-1.35173207482145,3.35247519753738,  
-0.403204198442509,0.686798011343181,NA  
"25661","AC015908.3",0,NA,NA,NA,NA,NA  
"25662","AC005304.1",0.142120095111522,-0.0533240139618842,3.352475197  
53738,-0.0159058638229611,0.987309491940711,NA  
"25663","SLC35G3",0,NA,NA,NA,NA,NA  
"25664","CCL15",0,NA,NA,NA,NA,NA  
"25665","AC243830.3",0.142120095111522,-0.0533240139618842,3.352475197  
53738,-0.0159058638229611,0.987309491940711,NA  
"25666","TBC1D3C",0,NA,NA,NA,NA,NA  
"25667","ARL5C",0,NA,NA,NA,NA,NA  
"25668","AC003070.2",0,NA,NA,NA,NA,NA  
"25669","AC011195.2",0,NA,NA,NA,NA,NA  
"25670","AC111170.2",0,NA,NA,NA,NA,NA  
"25671","AP001010.1",0,NA,NA,NA,NA,NA  
"25672","ANKRD30B",0.168565237602375,-1.35173207482145,3.3524751975373  
8,-0.40320419844251,0.686798011343181,NA  
"25673","AP006565.1",0.168565237602375,-1.35173207482145,3.35247519753  
738,-0.40320419844251,0.686798011343181,NA  
"25674","AC118757.1",0,NA,NA,NA,NA,NA  
"25675","AC023090.1",0,NA,NA,NA,NA,NA  
"25676","AC005954.2",0,NA,NA,NA,NA,NA  
"25677","NMRK2",0,NA,NA,NA,NA,NA  
"25678","AC011451.3",0,NA,NA,NA,NA,NA  
"25679","B3GNT3",0,NA,NA,NA,NA,NA  
"25680","AC011479.4",0,NA,NA,NA,NA,NA  
"25681","CEACAM8",0,NA,NA,NA,NA,NA  
"25682","AC010643.1",0,NA,NA,NA,NA,NA  
"25683","AC005261.3",0,NA,NA,NA,NA,NA  
"25684","CST4",0,NA,NA,NA,NA,NA  
"25685","CST5",0,NA,NA,NA,NA,NA  
"25686","MIR663AHG",0,NA,NA,NA,NA,NA  
"25687","AL139351.2",0,NA,NA,NA,NA,NA

"25688", "AL121581.2", 0, NA, NA, NA, NA, NA  
"25689", "LINC01670", 0, NA, NA, NA, NA, NA  
"25690", "CU634019.5", 0, NA, NA, NA, NA, NA  
"25691", "SMIM34B", 0, NA, NA, NA, NA, NA  
"25692", "AP001610.3", 0, NA, NA, NA, NA, NA  
"25693", "AP001469.1", 0, NA, NA, NA, NA, NA  
"25694", "AP000542.2", 0, NA, NA, NA, NA, NA  
"25695", "AC007666.2", 0, NA, NA, NA, NA, NA  
"25696", "FAM230J", 0.142120095111522, -0.0533240139618842, 3.352475197537  
38, -0.0159058638229611, 0.987309491940711, NA  
"25697", "AC007308.1", 0, NA, NA, NA, NA, NA  
"25698", "IGLV2-18", 0, NA, NA, NA, NA, NA  
"25699", "AC005005.3", 0.203054089861245, -1.95461545718866, 3.33573296423  
696, -0.585962808817275, 0.557900507779092, NA  
"25700", "CSDC2", 0, NA, NA, NA, NA, NA  
"25701", "AL928596.1", 0, NA, NA, NA, NA, NA  
"25702", "LINC01281", 0, NA, NA, NA, NA, NA  
"25703", "LINC01282", 0, NA, NA, NA, NA, NA  
"25704", "LINC01283", 0, NA, NA, NA, NA, NA  
"25705", "AC004973.1", 0, NA, NA, NA, NA, NA  
"25706", "SMIM9", 0, NA, NA, NA, NA, NA  
"25707", "WASIR1", 0, NA, NA, NA, NA, NA  
"25708", "AC004556.3", 0, NA, NA, NA, NA, NA  
"25709", "TAS1R1", 0, NA, NA, NA, NA, NA  
"25710", "AL357140.4", 0, NA, NA, NA, NA, NA  
"25711", "HTR1D", 0, NA, NA, NA, NA, NA  
"25712", "AL451070.1", 0.102230937222884, -1.35173207482145, 3.35247519753  
738, -0.403204198442509, 0.686798011343181, NA  
"25713", "AL513327.2", 0, NA, NA, NA, NA, NA  
"25714", "GRIK3", 0, NA, NA, NA, NA, NA  
"25715", "CDCP2", 0, NA, NA, NA, NA, NA  
"25716", "AL513285.1", 0.102230937222884, -1.35173207482145, 3.35247519753  
738, -0.403204198442509, 0.686798011343181, NA  
"25717", "AL355310.1", 0, NA, NA, NA, NA, NA  
"25718", "AL158847.1", 0, NA, NA, NA, NA, NA  
"25719", "AL589765.6", 0, NA, NA, NA, NA, NA  
"25720", "AL590666.3", 0, NA, NA, NA, NA, NA  
"25721", "ETV3L", 0, NA, NA, NA, NA, NA  
"25722", "AL354714.3", 0, NA, NA, NA, NA, NA  
"25723", "CCDC190", 0, NA, NA, NA, NA, NA  
"25724", "LRRC52-  
AS1", 0.30528502708413, -2.35094355977522, 3.02528291170748, -0.7770987469  
22923, 0.437100513227499, NA  
"25725", "LINC01645", 0, NA, NA, NA, NA, NA  
"25726", "AL136114.1", 0, NA, NA, NA, NA, NA  
"25727", "MYBPH", 0, NA, NA, NA, NA, NA  
"25728", "KLHDC8A", 0, NA, NA, NA, NA, NA  
"25729", "AC092810.4", 0, NA, NA, NA, NA, NA  
"25730", "USH2A", 0.102230937222884, -1.35173207482145, 3.35247519753738, -  
0.403204198442509, 0.686798011343181, NA

"25731", "AL356364.1", 0, NA, NA, NA, NA, NA  
"25732", "RNU6ATAC35P", 0, NA, NA, NA, NA, NA  
"25733", "LINC02813", 0.102230937222884, -1.35173207482145, 3.352475197537  
38, -0.403204198442509, 0.686798011343181, NA  
"25734", "AL353052.1", 0, NA, NA, NA, NA, NA  
"25735", "KCNF1", 0, NA, NA, NA, NA, NA  
"25736", "VSNL1", 0, NA, NA, NA, NA, NA  
"25737", "LINC01320", 0, NA, NA, NA, NA, NA  
"25738", "AC007317.2", 0, NA, NA, NA, NA, NA  
"25739", "AC016722.1", 0, NA, NA, NA, NA, NA  
"25740", "AC093732.2", 0, NA, NA, NA, NA, NA  
"25741", "AC007880.1", 0, NA, NA, NA, NA, NA  
"25742", "AC005034.2", 0.204461874445769, -1.96013641505178, 3.33548947920  
397, -0.587660799793491, 0.556759992345141, NA  
"25743", "AC062037.2", 0.102230937222884, -1.35173207482145, 3.35247519753  
738, -0.403204198442509, 0.686798011343181, NA  
"25744", "SLC9A2", 0, NA, NA, NA, NA, NA  
"25745", "LINC01114", 0, NA, NA, NA, NA, NA  
"25746", "SLC5A7", 0, NA, NA, NA, NA, NA  
"25747", "IL37", 0, NA, NA, NA, NA, NA  
"25748", "LINC01823", 0, NA, NA, NA, NA, NA  
"25749", "AC009480.1", 0, NA, NA, NA, NA, NA  
"25750", "AC009227.1", 0.102230937222884, -1.35173207482145, 3.35247519753  
738, -0.403204198442509, 0.686798011343181, NA  
"25751", "AC104088.3", 0, NA, NA, NA, NA, NA  
"25752", "LINC02832", 0.100823152638361, -1.35173207482145, 3.352475197537  
38, -0.40320419844251, 0.686798011343181, NA  
"25753", "SLC6A11", 0, NA, NA, NA, NA, NA  
"25754", "LRRC3B", 0.102230937222884, -1.35173207482145, 3.35247519753738,  
-0.403204198442509, 0.686798011343181, NA  
"25755", "TMEM89", 0, NA, NA, NA, NA, NA  
"25756", "AC098479.1", 0, NA, NA, NA, NA, NA  
"25757", "AC121493.1", 0, NA, NA, NA, NA, NA  
"25758", "AC114401.1", 0.102230937222884, -1.35173207482145, 3.35247519753  
738, -0.403204198442509, 0.686798011343181, NA  
"25759", "AC112219.2", 0, NA, NA, NA, NA, NA  
"25760", "LINC02005", 0, NA, NA, NA, NA, NA  
"25761", "LINC00971", 0, NA, NA, NA, NA, NA  
"25762", "AC108749.1", 0, NA, NA, NA, NA, NA  
"25763", "ZPLD1", 0, NA, NA, NA, NA, NA  
"25764", "LINC02024", 0, NA, NA, NA, NA, NA  
"25765", "UROC1", 0, NA, NA, NA, NA, NA  
"25766", "KY", 0, NA, NA, NA, NA, NA  
"25767", "AADACL2-AS1", 0, NA, NA, NA, NA, NA  
"25768", "IQCJ-SCHIP1-  
AS1", 0.509746901529898, -3.0117753024691, 2.56629025454459, -1.1735910609  
2368, 0.24055886341771, NA  
"25769", "LINC02082", 0, NA, NA, NA, NA, NA  
"25770", "LINC01840", 0, NA, NA, NA, NA, NA  
"25771", "IGF2BP2-

AS1",0.303877242499606,-2.34617912601169,3.02976049563007,-0.774377753  
421653,0.438707435439005,NA  
"25772","LINC01991",0,NA,NA,NA,NA,NA  
"25773","LINC02026",0.102230937222884,-1.35173207482145,3.352475197537  
38,-0.403204198442509,0.686798011343181,NA  
"25774","LINC02048",0.102230937222884,-1.35173207482145,3.352475197537  
38,-0.403204198442509,0.686798011343181,NA  
"25775","LMLN-AS1",0,NA,NA,NA,NA,NA  
"25776","LINC02600",0,NA,NA,NA,NA,NA  
"25777","AC112254.1",0,NA,NA,NA,NA,NA  
"25778","AC092546.1",0,NA,NA,NA,NA,NA  
"25779","LINC02493",0,NA,NA,NA,NA,NA  
"25780","LINC02473",0,NA,NA,NA,NA,NA  
"25781","LINC02513",0,NA,NA,NA,NA,NA  
"25782","AC111006.1",0,NA,NA,NA,NA,NA  
"25783","PF4",0,NA,NA,NA,NA,NA  
"25784","PPBP",0,NA,NA,NA,NA,NA  
"25785","NAA11",0,NA,NA,NA,NA,NA  
"25786","AC112250.2",0,NA,NA,NA,NA,NA  
"25787","AC080089.2",0,NA,NA,NA,NA,NA  
"25788","TTC29",0.204461874445769,-1.96013641505178,3.33548947920397,-  
0.587660799793491,0.556759992345141,NA  
"25789","AC108477.1",0,NA,NA,NA,NA,NA  
"25790","AC114930.1",0,NA,NA,NA,NA,NA  
"25791","AC025178.1",0,NA,NA,NA,NA,NA  
"25792","AC025470.2",0,NA,NA,NA,NA,NA  
"25793","LINC02219",0,NA,NA,NA,NA,NA  
"25794","AC010280.1",0,NA,NA,NA,NA,NA  
"25795","AC093248.1",0,NA,NA,NA,NA,NA  
"25796","ATG10-IT1",0,NA,NA,NA,NA,NA  
"25797","AC008592.1",0,NA,NA,NA,NA,NA  
"25798","LINC00491",0,NA,NA,NA,NA,NA  
"25799","KCNN2",0,NA,NA,NA,NA,NA  
"25800","AC113398.2",0,NA,NA,NA,NA,NA  
"25801","AC008591.1",0.102230937222884,-1.35173207482145,3.35247519753  
738,-0.403204198442509,0.686798011343181,NA  
"25802","FSTL4",0,NA,NA,NA,NA,NA  
"25803","PCDHB1",0,NA,NA,NA,NA,NA  
"25804","HAND1",0,NA,NA,NA,NA,NA  
"25805","KIF4B",0.102230937222884,-1.35173207482145,3.35247519753738,-  
0.403204198442509,0.686798011343181,NA  
"25806","LINC01845",0,NA,NA,NA,NA,NA  
"25807","ATP10B",0,NA,NA,NA,NA,NA  
"25808","FOXI1",0,NA,NA,NA,NA,NA  
"25809","AC022440.1",0,NA,NA,NA,NA,NA  
"25810","AC022217.2",0,NA,NA,NA,NA,NA  
"25811","AC109479.1",0,NA,NA,NA,NA,NA  
"25812","AL391422.2",0,NA,NA,NA,NA,NA  
"25813","AL133268.2",0.102230937222884,-1.35173207482145,3.35247519753  
738,-0.403204198442509,0.686798011343181,NA



"25814", "SFTA2", 0, NA, NA, NA, NA, NA  
"25815", "HCG21", 0.100823152638361, -1.35173207482145, 3.35247519753738, -  
0.40320419844251, 0.686798011343181, NA  
"25816", "TDRG1", 0.102230937222884, -1.35173207482145, 3.35247519753738, -  
0.403204198442509, 0.686798011343181, NA  
"25817", "AL365205.4", 0, NA, NA, NA, NA, NA  
"25818", "MEP1A", 0, NA, NA, NA, NA, NA  
"25819", "TFAP2B", 0, NA, NA, NA, NA, NA  
"25820", "KHDRBS2-OT", 0, NA, NA, NA, NA, NA  
"25821", "KHDC3L", 0, NA, NA, NA, NA, NA  
"25822", "LINC01621", 0, NA, NA, NA, NA, NA  
"25823", "AC002464.1", 0, NA, NA, NA, NA, NA  
"25824", "AL445224.1", 0, NA, NA, NA, NA, NA  
"25825", "CALHM4", 0, NA, NA, NA, NA, NA  
"25826", "AL354936.1", 0, NA, NA, NA, NA, NA  
"25827", "AL035446.2", 0, NA, NA, NA, NA, NA  
"25828", "AL023581.1", 0.219614265997676, -1.35173207482145, 3.35247519753  
738, -0.40320419844251, 0.686798011343181, NA  
"25829", "AL589693.1", 0, NA, NA, NA, NA, NA  
"25830", "PACRG-AS1", 0, NA, NA, NA, NA, NA  
"25831", "RPS6KA2-IT1", 0, NA, NA, NA, NA, NA  
"25832", "AL121935.3", 0.168565237602375, -1.35173207482145, 3.35247519753  
738, -0.40320419844251, 0.686798011343181, NA  
"25833", "AL109924.1", 0, NA, NA, NA, NA, NA  
"25834", "AC226118.1", 0, NA, NA, NA, NA, NA  
"25835", "AC018706.1", 0.102230937222884, -1.35173207482145, 3.35247519753  
738, -0.403204198442509, 0.686798011343181, NA  
"25836", "AC004947.3", 0, NA, NA, NA, NA, NA  
"25837", "GHRHR", 0, NA, NA, NA, NA, NA  
"25838", "MYL7", 0, NA, NA, NA, NA, NA  
"25839", "SPATA48", 0, NA, NA, NA, NA, NA  
"25840", "LINC01446", 0, NA, NA, NA, NA, NA  
"25841", "AC099398.1", 0, NA, NA, NA, NA, NA  
"25842", "CYP3A7", 0.102230937222884, -1.35173207482145, 3.35247519753738,  
-0.403204198442509, 0.686798011343181, NA  
"25843", "CYP3A43", 0, NA, NA, NA, NA, NA  
"25844", "MUC3A", 0, NA, NA, NA, NA, NA  
"25845", "AC073323.1", 0, NA, NA, NA, NA, NA  
"25846", "CHRM2", 0, NA, NA, NA, NA, NA  
"25847", "AC010973.1", 0.100823152638361, -1.35173207482145, 3.35247519753  
738, -0.40320419844251, 0.686798011343181, NA  
"25848", "AC006967.3", 0, NA, NA, NA, NA, NA  
"25849", "AC129915.3", 0, NA, NA, NA, NA, NA  
"25850", "AC103719.1", 0, NA, NA, NA, NA, NA  
"25851", "AC021613.3", 0, NA, NA, NA, NA, NA  
"25852", "AC011726.3", 0, NA, NA, NA, NA, NA  
"25853", "DKK4", 0, NA, NA, NA, NA, NA  
"25854", "AC021915.2", 0, NA, NA, NA, NA, NA  
"25855", "RP1", 0, NA, NA, NA, NA, NA  
"25856", "NKAIN3-IT1", 0, NA, NA, NA, NA, NA

"25857", "AC087672.1", 0, NA, NA, NA, NA, NA  
"25858", "AC009902.3", 0, NA, NA, NA, NA, NA  
"25859", "PMP2", 0, NA, NA, NA, NA, NA  
"25860", "DCAF4L2", 0, NA, NA, NA, NA, NA  
"25861", "CDH17", 0.100823152638361, -1.35173207482145, 3.35247519753738, -  
0.40320419844251, 0.686798011343181, NA  
"25862", "AP003465.2", 0, NA, NA, NA, NA, NA  
"25863", "AP001574.1", 0, NA, NA, NA, NA, NA  
"25864", "LINC02845", 0, NA, NA, NA, NA, NA  
"25865", "AC025370.1", 0, NA, NA, NA, NA, NA  
"25866", "RSP02", 0, NA, NA, NA, NA, NA  
"25867", "LINC01609", 0, NA, NA, NA, NA, NA  
"25868", "MAL2", 0, NA, NA, NA, NA, NA  
"25869", "SMILR", 0.33713047520475, -2.38103637458962, 3.31815804257558, -0  
.71757774766552, 0.473017682228765, NA  
"25870", "IZUM03", 0.102230937222884, -1.35173207482145, 3.35247519753738,  
-0.403204198442509, 0.686798011343181, NA  
"25871", "AL356489.3", 0, NA, NA, NA, NA, NA  
"25872", "FAM205C", 0, NA, NA, NA, NA, NA  
"25873", "FOX4L5", 0, NA, NA, NA, NA, NA  
"25874", "AL161912.2", 0, NA, NA, NA, NA, NA  
"25875", "AL355607.2", 0, NA, NA, NA, NA, NA  
"25876", "BX649601.1", 0, NA, NA, NA, NA, NA  
"25877", "AL355597.1", 0, NA, NA, NA, NA, NA  
"25878", "LINC02668", 0, NA, NA, NA, NA, NA  
"25879", "AC025822.2", 0, NA, NA, NA, NA, NA  
"25880", "AL512631.2", 0, NA, NA, NA, NA, NA  
"25881", "C1QL3", 0, NA, NA, NA, NA, NA  
"25882", "SLC39A12", 0, NA, NA, NA, NA, NA  
"25883", "OR13A1", 0, NA, NA, NA, NA, NA  
"25884", "LINC02675", 0.100823152638361, -1.35173207482145, 3.352475197537  
38, -0.40320419844251, 0.686798011343181, NA  
"25885", "AC245041.2", 0, NA, NA, NA, NA, NA  
"25886", "AC035139.1", 0, NA, NA, NA, NA, NA  
"25887", "AC060234.3", 0, NA, NA, NA, NA, NA  
"25888", "LINC02625", 0, NA, NA, NA, NA, NA  
"25889", "LINC02636", 0, NA, NA, NA, NA, NA  
"25890", "NODAL", 0, NA, NA, NA, NA, NA  
"25891", "AC010163.1", 0, NA, NA, NA, NA, NA  
"25892", "AL391425.1", 0, NA, NA, NA, NA, NA  
"25893", "LINC01153", 0, NA, NA, NA, NA, NA  
"25894", "AL357127.2", 0.102230937222884, -1.35173207482145, 3.35247519753  
738, -0.403204198442509, 0.686798011343181, NA  
"25895", "AL512622.1", 0.102230937222884, -1.35173207482145, 3.35247519753  
738, -0.403204198442509, 0.686798011343181, NA  
"25896", "ODF3", 0, NA, NA, NA, NA, NA  
"25897", "LINC02752", 0, NA, NA, NA, NA, NA  
"25898", "RASSF10", 0, NA, NA, NA, NA, NA  
"25899", "LINC02718", 0, NA, NA, NA, NA, NA  
"25900", "MPPED2-AS1", 0, NA, NA, NA, NA, NA

"25901", "PAUPAR", 0.204461874445769, -1.96013641505178, 3.33548947920397, -0.587660799793491, 0.556759992345141, NA  
"25902", "OR5B21", 0, NA, NA, NA, NA, NA  
"25903", "AP000777.2", 0, NA, NA, NA, NA, NA  
"25904", "AP001591.1", 0, NA, NA, NA, NA, NA  
"25905", "AP005233.2", 0.302469457915082, -2.33550018378661, 3.3206786067292, -0.703320152409159, 0.481856254557762, NA  
"25906", "MIR4300HG", 0, NA, NA, NA, NA, NA  
"25907", "MMP10", 0.102230937222884, -1.35173207482145, 3.35247519753738, -0.403204198442509, 0.686798011343181, NA  
"25908", "OR8G5", 0, NA, NA, NA, NA, NA  
"25909", "ACRV1", 0.102230937222884, -1.35173207482145, 3.35247519753738, -0.403204198442509, 0.686798011343181, NA  
"25910", "AP000842.3", 0, NA, NA, NA, NA, NA  
"25911", "FGF23", 0, NA, NA, NA, NA, NA  
"25912", "AC006063.4", 0.100823152638361, -1.35173207482145, 3.35247519753738, -0.40320419844251, 0.686798011343181, NA  
"25913", "MIR200CHG", 0, NA, NA, NA, NA, NA  
"25914", "ARNTL2-AS1", 0, NA, NA, NA, NA, NA  
"25915", "AC004241.4", 0, NA, NA, NA, NA, NA  
"25916", "DNAJC22", 0, NA, NA, NA, NA, NA  
"25917", "AC068987.2", 0, NA, NA, NA, NA, NA  
"25918", "KRT79", 0, NA, NA, NA, NA, NA  
"25919", "AC025162.1", 0, NA, NA, NA, NA, NA  
"25920", "INHBC", 0, NA, NA, NA, NA, NA  
"25921", "LINC01479", 0.708616922236088, -3.3255153775786, 2.07422613253817, -1.60325594466851, 0.108878158632903, NA  
"25922", "AC117505.1", 0, NA, NA, NA, NA, NA  
"25923", "LINC00485", 0, NA, NA, NA, NA, NA  
"25924", "CASC18", 0, NA, NA, NA, NA, NA  
"25925", "CCDC63", 0, NA, NA, NA, NA, NA  
"25926", "PITPNM2-AS1", 0, NA, NA, NA, NA, NA  
"25927", "AC117500.1", 0, NA, NA, NA, NA, NA  
"25928", "AL356259.1", 0, NA, NA, NA, NA, NA  
"25929", "AL138999.2", 0, NA, NA, NA, NA, NA  
"25930", "FREM2", 0, NA, NA, NA, NA, NA  
"25931", "STOML3", 0, NA, NA, NA, NA, NA  
"25932", "SPERT", 0, NA, NA, NA, NA, NA  
"25933", "SIAH3", 0, NA, NA, NA, NA, NA  
"25934", "LINC00462", 0, NA, NA, NA, NA, NA  
"25935", "AL139082.1", 0, NA, NA, NA, NA, NA  
"25936", "AL512452.1", 0, NA, NA, NA, NA, NA  
"25937", "SLC15A1", 0.204461874445769, -1.96013641505178, 3.33548947920397, -0.587660799793491, 0.556759992345141, NA  
"25938", "AL162574.2", 0, NA, NA, NA, NA, NA  
"25939", "AL356740.1", 0, NA, NA, NA, NA, NA  
"25940", "AL160396.2", 0, NA, NA, NA, NA, NA  
"25941", "AL133371.2", 0, NA, NA, NA, NA, NA  
"25942", "AL135878.1", 0, NA, NA, NA, NA, NA  
"25943", "AL136298.1", 0.100823152638361, -1.35173207482145, 3.35247519753

738,-0.40320419844251,0.686798011343181,NA  
"25944","AL049835.1",0,NA,NA,NA,NA,NA  
"25945","AL096869.3",0.102230937222884,-1.35173207482145,3.35247519753  
738,-0.403204198442509,0.686798011343181,NA  
"25946","AL096869.2",0,NA,NA,NA,NA,NA  
"25947","LINC02279",0,NA,NA,NA,NA,NA  
"25948","TUNAR",0,NA,NA,NA,NA,NA  
"25949","AC012414.3",0,NA,NA,NA,NA,NA  
"25950","AC060814.5",0,NA,NA,NA,NA,NA  
"25951","PWRN1",0,NA,NA,NA,NA,NA  
"25952","AC022613.1",0,NA,NA,NA,NA,NA  
"25953","GOLGA8J",0,NA,NA,NA,NA,NA  
"25954","AC010931.3",0.100823152638361,-1.35173207482145,3.35247519753  
738,-0.40320419844251,0.686798011343181,NA  
"25955","AC105020.2",0,NA,NA,NA,NA,NA  
"25956","CHRNA3",0,NA,NA,NA,NA,NA  
"25957","AC087761.1",0,NA,NA,NA,NA,NA  
"25958","AC015660.5",0,NA,NA,NA,NA,NA  
"25959","AC004233.1",0,NA,NA,NA,NA,NA  
"25960","AC026458.2",0.100823152638361,-1.35173207482145,3.35247519753  
738,-0.40320419844251,0.686798011343181,NA  
"25961","AC009121.2",0,NA,NA,NA,NA,NA  
"25962","AC136443.3",0,NA,NA,NA,NA,NA  
"25963","AC099518.2",0,NA,NA,NA,NA,NA  
"25964","AC023813.1",0,NA,NA,NA,NA,NA  
"25965","AC007861.1",0,NA,NA,NA,NA,NA  
"25966","AC026462.3",0.168565237602375,-1.35173207482145,3.35247519753  
738,-0.40320419844251,0.686798011343181,NA  
"25967","AC092118.1",0.32184520322056,-2.1004006767475,3.0000411347961  
3,-0.70012395909706,0.483849894373614,NA  
"25968","AC025284.1",0,NA,NA,NA,NA,NA  
"25969","AC026469.1",0.102230937222884,-1.35173207482145,3.35247519753  
738,-0.403204198442509,0.686798011343181,NA  
"25970","AC018695.8",0,NA,NA,NA,NA,NA  
"25971","AC129507.2",0.102230937222884,-1.35173207482145,3.35247519753  
738,-0.403204198442509,0.686798011343181,NA  
"25972","AC129507.3",0,NA,NA,NA,NA,NA  
"25973","AC006435.3",0,NA,NA,NA,NA,NA  
"25974","AC138207.1",0,NA,NA,NA,NA,NA  
"25975","AC079336.3",0,NA,NA,NA,NA,NA  
"25976","CCL1",0.100823152638361,-1.35173207482145,3.35247519753738,-0  
.40320419844251,0.686798011343181,NA  
"25977","LINC00974",0,NA,NA,NA,NA,NA  
"25978","KRT14",0,NA,NA,NA,NA,NA  
"25979","KRT16",0,NA,NA,NA,NA,NA  
"25980","AC004687.3",0,NA,NA,NA,NA,NA  
"25981","AC087301.1",0,NA,NA,NA,NA,NA  
"25982","USH1G",0,NA,NA,NA,NA,NA  
"25983","SEPTIN9-DT",0,NA,NA,NA,NA,NA  
"25984","AP000829.1",0,NA,NA,NA,NA,NA

"25985", "LINC01443", 0, NA, NA, NA, NA, NA  
"25986", "CTAGE1", 0, NA, NA, NA, NA, NA  
"25987", "AC012588.1", 0.102230937222884, -1.35173207482145, 3.35247519753  
738, -0.403204198442509, 0.686798011343181, NA  
"25988", "DSC3", 0, NA, NA, NA, NA, NA  
"25989", "TTR", 0, NA, NA, NA, NA, NA  
"25990", "AC021517.1", 0, NA, NA, NA, NA, NA  
"25991", "ONECUT2", 0, NA, NA, NA, NA, NA  
"25992", "RAX", 0.846744496302366, -3.64362465916853, 1.91108319015993, -1.  
90657564146311, 0.0565755618842781, NA  
"25993", "AC091691.3", 0, NA, NA, NA, NA, NA  
"25994", "AC004637.1", 0, NA, NA, NA, NA, NA  
"25995", "AC011498.3", 0, NA, NA, NA, NA, NA  
"25996", "AC005594.1", 0, NA, NA, NA, NA, NA  
"25997", "AC010336.3", 0.102230937222884, -1.35173207482145, 3.35247519753  
738, -0.403204198442509, 0.686798011343181, NA  
"25998", "AC011461.1", 0.102230937222884, -1.35173207482145, 3.35247519753  
738, -0.403204198442509, 0.686798011343181, NA  
"25999", "UNC13A", 0.168565237602375, -1.35173207482145, 3.35247519753738,  
-0.40320419844251, 0.686798011343181, NA  
"26000", "LINC01785", 0, NA, NA, NA, NA, NA  
"26001", "LINC01224", 0, NA, NA, NA, NA, NA  
"26002", "AC020905.1", 0.102230937222884, -1.35173207482145, 3.35247519753  
738, -0.403204198442509, 0.686798011343181, NA  
"26003", "NPHS1", 0, NA, NA, NA, NA, NA  
"26004", "AC092071.1", 0, NA, NA, NA, NA, NA  
"26005", "AC006262.2", 0.100823152638361, -1.35173207482145, 3.35247519753  
738, -0.40320419844251, 0.686798011343181, NA  
"26006", "SYNGR4", 0, NA, NA, NA, NA, NA  
"26007", "NUCB1-AS1", 0, NA, NA, NA, NA, NA  
"26008", "CCDC155", 0, NA, NA, NA, NA, NA  
"26009", "IZUM02", 0, NA, NA, NA, NA, NA  
"26010", "AC010320.3", 0.102230937222884, -1.35173207482145, 3.35247519753  
738, -0.403204198442509, 0.686798011343181, NA  
"26011", "AC008735.3", 0, NA, NA, NA, NA, NA  
"26012", "SLC52A3", 0, NA, NA, NA, NA, NA  
"26013", "LINC00658", 0, NA, NA, NA, NA, NA  
"26014", "PARAL1", 0, NA, NA, NA, NA, NA  
"26015", "LINC01722", 0, NA, NA, NA, NA, NA  
"26016", "LINC01747", 0, NA, NA, NA, NA, NA  
"26017", "AL118523.1", 0, NA, NA, NA, NA, NA  
"26018", "AL021395.1", 0, NA, NA, NA, NA, NA  
"26019", "OCSTAMP", 0, NA, NA, NA, NA, NA  
"26020", "AL132655.1", 0, NA, NA, NA, NA, NA  
"26021", "MYT1", 0, NA, NA, NA, NA, NA  
"26022", "CYR1-AS1", 0, NA, NA, NA, NA, NA  
"26023", "AP001596.2", 0, NA, NA, NA, NA, NA  
"26024", "LINC00314", 0, NA, NA, NA, NA, NA  
"26025", "AP001037.1", 0, NA, NA, NA, NA, NA  
"26026", "LINC00114", 0, NA, NA, NA, NA, NA

"26027", "RIPK4", 0, NA, NA, NA, NA, NA  
"26028", "TRPM2-AS", 0, NA, NA, NA, NA, NA  
"26029", "AP001066.1", 0, NA, NA, NA, NA, NA  
"26030", "LINC00163", 0.102230937222884, -1.35173207482145, 3.352475197537  
38, -0.403204198442509, 0.686798011343181, NA  
"26031", "XKR3", 0.408923748891538, -2.68302595843898, 3.30195635283568, -0  
.812556457972206, 0.416472404531544, NA  
"26032", "AC000082.1", 0, NA, NA, NA, NA, NA  
"26033", "IGLV2-33", 0, NA, NA, NA, NA, NA  
"26034", "LIF-AS1", 0, NA, NA, NA, NA, NA  
"26035", "C22orf42", 0, NA, NA, NA, NA, NA  
"26036", "AC207130.1", 0, NA, NA, NA, NA, NA  
"26037", "MPC1L", 0, NA, NA, NA, NA, NA  
"26038", "SYP-AS1", 0, NA, NA, NA, NA, NA  
"26039", "AL445213.2", 0, NA, NA, NA, NA, NA  
"26040", "NXF3", 0, NA, NA, NA, NA, NA  
"26041", "PWWP3B", 0.100823152638361, -1.35173207482145, 3.35247519753738,  
-0.40320419844251, 0.686798011343181, NA  
"26042", "HSFX4", 0, NA, NA, NA, NA, NA  
"26043", "U52112.1", 0, NA, NA, NA, NA, NA  
"26044", "AC245140.3", 0, NA, NA, NA, NA, NA  
"26045", "C8A", 0, NA, NA, NA, NA, NA  
"26046", "AL450468.2", 0, NA, NA, NA, NA, NA  
"26047", "LINC00626", 0, NA, NA, NA, NA, NA  
"26048", "LINC01222", 0, NA, NA, NA, NA, NA  
"26049", "CTSE", 0, NA, NA, NA, NA, NA  
"26050", "AL596218.1", 0.100823152638361, -1.35173207482145, 3.35247519753  
738, -0.40320419844251, 0.686798011343181, NA  
"26051", "AL670729.2", 0, NA, NA, NA, NA, NA  
"26052", "AC027612.5", 0, NA, NA, NA, NA, NA  
"26053", "IL36B", 0, NA, NA, NA, NA, NA  
"26054", "AC023347.1", 0, NA, NA, NA, NA, NA  
"26055", "AC064852.1", 0.219614265997676, -1.35173207482145, 3.35247519753  
738, -0.40320419844251, 0.686798011343181, NA  
"26056", "CAMKV", 0, NA, NA, NA, NA, NA  
"26057", "A4GNT", 0, NA, NA, NA, NA, NA  
"26058", "AC084048.1", 0, NA, NA, NA, NA, NA  
"26059", "AC006296.3", 0, NA, NA, NA, NA, NA  
"26060", "FGFBP1", 0.219614265997676, -1.35173207482145, 3.35247519753738,  
-0.40320419844251, 0.686798011343181, NA  
"26061", "AC097709.1", 0, NA, NA, NA, NA, NA  
"26062", "AC093895.1", 0, NA, NA, NA, NA, NA  
"26063", "AC022447.5", 0, NA, NA, NA, NA, NA  
"26064", "CAPSL", 0, NA, NA, NA, NA, NA  
"26065", "LINC01331", 0, NA, NA, NA, NA, NA  
"26066", "AC025766.1", 0, NA, NA, NA, NA, NA  
"26067", "ADAMTS19-  
AS1", 0.219614265997676, -1.35173207482145, 3.35247519753738, -0.403204198  
44251, 0.686798011343181, NA  
"26068", "SPINK1", 0, NA, NA, NA, NA, NA

"26069", "AL031058.1", 0, NA, NA, NA, NA, NA  
"26070", "AL035587.3", 0, NA, NA, NA, NA, NA  
"26071", "LINC01564", 0, NA, NA, NA, NA, NA  
"26072", "AL713998.1", 0, NA, NA, NA, NA, NA  
"26073", "ROS1", 0, NA, NA, NA, NA, NA  
"26074", "AL132982.1", 0, NA, NA, NA, NA, NA  
"26075", "C6orf118", 0, NA, NA, NA, NA, NA  
"26076", "MACC1-  
AS1", 0.219614265997676, -1.35173207482145, 3.35247519753738, -0.403204198  
44251, 0.686798011343181, NA  
"26077", "AC092448.1", 0, NA, NA, NA, NA, NA  
"26078", "TAC1", 0.100823152638361, -1.35173207482145, 3.35247519753738, -0  
.40320419844251, 0.686798011343181, NA  
"26079", "TMEM213", 0, NA, NA, NA, NA, NA  
"26080", "AC100802.1", 0, NA, NA, NA, NA, NA  
"26081", "AC022733.1", 0.219614265997676, -1.35173207482145, 3.35247519753  
738, -0.40320419844251, 0.686798011343181, NA  
"26082", "AC100801.1", 0, NA, NA, NA, NA, NA  
"26083", "AP003351.1", 0, NA, NA, NA, NA, NA  
"26084", "LINC01242", 0, NA, NA, NA, NA, NA  
"26085", "AL590491.2", 0, NA, NA, NA, NA, NA  
"26086", "AL162585.1", 0, NA, NA, NA, NA, NA  
"26087", "AL353768.1", 0, NA, NA, NA, NA, NA  
"26088", "LINC02657", 0, NA, NA, NA, NA, NA  
"26089", "AC069023.1", 0, NA, NA, NA, NA, NA  
"26090", "DUPD1", 0, NA, NA, NA, NA, NA  
"26091", "AC068580.1", 0, NA, NA, NA, NA, NA  
"26092", "AC100763.1", 0, NA, NA, NA, NA, NA  
"26093", "AC110058.1", 0, NA, NA, NA, NA, NA  
"26094", "LINC02748", 0, NA, NA, NA, NA, NA  
"26095", "AP000462.3", 0, NA, NA, NA, NA, NA  
"26096", "AP001994.2", 0.168565237602375, -1.35173207482145, 3.35247519753  
738, -0.40320419844251, 0.686798011343181, NA  
"26097", "OR8A1", 0, NA, NA, NA, NA, NA  
"26098", "AC006205.2", 0, NA, NA, NA, NA, NA  
"26099", "LINC00477", 0, NA, NA, NA, NA, NA  
"26100", "LINC00592", 0, NA, NA, NA, NA, NA  
"26101", "KRT80", 0, NA, NA, NA, NA, NA  
"26102", "AC107308.1", 0, NA, NA, NA, NA, NA  
"26103", "AC089998.1", 0, NA, NA, NA, NA, NA  
"26104", "LINC02415", 0.320437418636037, -2.09332987365482, 3.003552856113  
6, -0.696951235399085, 0.485833312087704, NA  
"26105", "URAD", 0, NA, NA, NA, NA, NA  
"26106", "AL442636.1", 0, NA, NA, NA, NA, NA  
"26107", "AL355103.1", 0.100823152638361, -1.35173207482145, 3.35247519753  
738, -0.40320419844251, 0.686798011343181, NA  
"26108", "AC022469.1", 0, NA, NA, NA, NA, NA  
"26109", "AC060814.3", 0, NA, NA, NA, NA, NA  
"26110", "GOLGA6L2", 0, NA, NA, NA, NA, NA  
"26111", "GCNT3", 0, NA, NA, NA, NA, NA

"26112", "TMEM114", 0, NA, NA, NA, NA, NA  
"26113", "ITFG1-AS1", 0, NA, NA, NA, NA, NA  
"26114", "AC009102.1", 0, NA, NA, NA, NA, NA  
"26115", "AC087565.1", 0, NA, NA, NA, NA, NA  
"26116", "AC009139.1", 0.100823152638361, -1.35173207482145, 3.35247519753  
738, -0.40320419844251, 0.686798011343181, NA  
"26117", "AC092134.3", 0, NA, NA, NA, NA, NA  
"26118", "AC005323.2", 0, NA, NA, NA, NA, NA  
"26119", "AC015688.6", 0, NA, NA, NA, NA, NA  
"26120", "AC099850.3", 0, NA, NA, NA, NA, NA  
"26121", "AP005262.2", 0, NA, NA, NA, NA, NA  
"26122", "AC027514.2", 0, NA, NA, NA, NA, NA  
"26123", "AC079062.1", 0, NA, NA, NA, NA, NA  
"26124", "RDH8", 0, NA, NA, NA, NA, NA  
"26125", "UCA1", 0, NA, NA, NA, NA, NA  
"26126", "AC024075.3", 0, NA, NA, NA, NA, NA  
"26127", "FAM187B", 0, NA, NA, NA, NA, NA  
"26128", "SBSN", 0.100823152638361, -1.35173207482145, 3.35247519753738, -0  
.40320419844251, 0.686798011343181, NA  
"26129", "CEACAM16", 0, NA, NA, NA, NA, NA  
"26130", "PTH2", 0, NA, NA, NA, NA, NA  
"26131", "DNAAF3", 0, NA, NA, NA, NA, NA  
"26132", "AC010327.4", 0.388179503600051, -2.37645961319578, 2.86395305033  
592, -0.829783020680815, 0.406661472415033, NA  
"26133", "NLRP11", 0, NA, NA, NA, NA, NA  
"26134", "PDYN-AS1", 0, NA, NA, NA, NA, NA  
"26135", "AL121892.1", 0, NA, NA, NA, NA, NA  
"26136", "XKR7", 0, NA, NA, NA, NA, NA  
"26137", "AP001625.3", 0, NA, NA, NA, NA, NA  
"26138", "USP41", 0, NA, NA, NA, NA, NA  
"26139", "IGLV7-43", 0, NA, NA, NA, NA, NA  
"26140", "TEX11", 0, NA, NA, NA, NA, NA  
"26141", "AP006222.2", 0, NA, NA, NA, NA, NA  
"26142", "AL358876.2", 0, NA, NA, NA, NA, NA  
"26143", "LINC02766", 0, NA, NA, NA, NA, NA  
"26144", "AL137802.1", 0, NA, NA, NA, NA, NA  
"26145", "ACTL8", 0, NA, NA, NA, NA, NA  
"26146", "LINC01755", 0, NA, NA, NA, NA, NA  
"26147", "AC242988.1", 0, NA, NA, NA, NA, NA  
"26148", "AL391069.3", 0, NA, NA, NA, NA, NA  
"26149", "LINC01704", 0, NA, NA, NA, NA, NA  
"26150", "SLC9C2", 0, NA, NA, NA, NA, NA  
"26151", "BRINP2", 0, NA, NA, NA, NA, NA  
"26152", "NPHS2", 0, NA, NA, NA, NA, NA  
"26153", "LEMD1", 0, NA, NA, NA, NA, NA  
"26154", "LINC01735", 0, NA, NA, NA, NA, NA  
"26155", "AC104333.4", 0, NA, NA, NA, NA, NA  
"26156", "TMEM78", 0, NA, NA, NA, NA, NA  
"26157", "AL118511.4", 0, NA, NA, NA, NA, NA  
"26158", "AL122008.3", 0, NA, NA, NA, NA, NA



"26159", "AL160408.5", 0, NA, NA, NA, NA, NA  
"26160", "AL359764.1", 0, NA, NA, NA, NA, NA  
"26161", "AC105450.1", 0, NA, NA, NA, NA, NA  
"26162", "AC141930.2", 0, NA, NA, NA, NA, NA  
"26163", "AC093390.2", 0, NA, NA, NA, NA, NA  
"26164", "RAD51AP2", 0, NA, NA, NA, NA, NA  
"26165", "AC096570.1", 0, NA, NA, NA, NA, NA  
"26166", "AC011247.1", 0.100823152638361, -1.35173207482145, 3.35247519753  
738, -0.40320419844251, 0.686798011343181, NA  
"26167", "AC092651.3", 0, NA, NA, NA, NA, NA  
"26168", "IGKV2-24", 0, NA, NA, NA, NA, NA  
"26169", "IGKV1D-39", 0, NA, NA, NA, NA, NA  
"26170", "IGKV1D-16", 0, NA, NA, NA, NA, NA  
"26171", "IGKV3D-11", 0, NA, NA, NA, NA, NA  
"26172", "SLC9A4", 0, NA, NA, NA, NA, NA  
"26173", "AC018730.1", 0, NA, NA, NA, NA, NA  
"26174", "AC226101.1", 0.168565237602375, -1.35173207482145, 3.35247519753  
738, -0.40320419844251, 0.686798011343181, NA  
"26175", "AC073409.1", 0, NA, NA, NA, NA, NA  
"26176", "LINC01920", 0.100823152638361, -1.35173207482145, 3.352475197537  
38, -0.40320419844251, 0.686798011343181, NA  
"26177", "AC016723.1", 0, NA, NA, NA, NA, NA  
"26178", "AC010983.1", 0, NA, NA, NA, NA, NA  
"26179", "AC007283.1", 0, NA, NA, NA, NA, NA  
"26180", "C2orf80", 0, NA, NA, NA, NA, NA  
"26181", "CRYBA2", 0, NA, NA, NA, NA, NA  
"26182", "SPATA3", 0.100823152638361, -1.35173207482145, 3.35247519753738,  
-0.40320419844251, 0.686798011343181, NA  
"26183", "AC106876.1", 0, NA, NA, NA, NA, NA  
"26184", "AC122134.1", 0.100823152638361, -1.35173207482145, 3.35247519753  
738, -0.40320419844251, 0.686798011343181, NA  
"26185", "PLCL2-AS1", 0, NA, NA, NA, NA, NA  
"26186", "KLHL40", 0, NA, NA, NA, NA, NA  
"26187", "UCN2", 0, NA, NA, NA, NA, NA  
"26188", "C3orf84", 0, NA, NA, NA, NA, NA  
"26189", "AC097637.3", 0, NA, NA, NA, NA, NA  
"26190", "TAFA4", 0, NA, NA, NA, NA, NA  
"26191", "AC055758.2", 0, NA, NA, NA, NA, NA  
"26192", "SLITRK3", 0, NA, NA, NA, NA, NA  
"26193", "AC107398.4", 0, NA, NA, NA, NA, NA  
"26194", "GSX2", 0, NA, NA, NA, NA, NA  
"26195", "AC021180.1", 0, NA, NA, NA, NA, NA  
"26196", "IBSP", 0, NA, NA, NA, NA, NA  
"26197", "MEPE", 0, NA, NA, NA, NA, NA  
"26198", "AC097459.1", 0, NA, NA, NA, NA, NA  
"26199", "NDST3", 0, NA, NA, NA, NA, NA  
"26200", "JADRR", 0, NA, NA, NA, NA, NA  
"26201", "AC098859.2", 0, NA, NA, NA, NA, NA  
"26202", "AC097375.3", 0.100823152638361, -1.35173207482145, 3.35247519753  
738, -0.40320419844251, 0.686798011343181, NA

"26203", "AC104407.1", 0, NA, NA, NA, NA, NA  
"26204", "NPY2R", 0, NA, NA, NA, NA, NA  
"26205", "AC107208.1", 0, NA, NA, NA, NA, NA  
"26206", "AC122710.2", 0, NA, NA, NA, NA, NA  
"26207", "AC008496.3", 0, NA, NA, NA, NA, NA  
"26208", "FAM81B", 0, NA, NA, NA, NA, NA  
"26209", "AC010255.3", 0.302469457915082, -2.33550018378661, 3.32067860672  
92, -0.703320152409159, 0.481856254557762, NA  
"26210", "LINC02240", 0, NA, NA, NA, NA, NA  
"26211", "GRXCR2", 0.100823152638361, -1.35173207482145, 3.35247519753738,  
-0.40320419844251, 0.686798011343181, NA  
"26212", "SPINK13", 0, NA, NA, NA, NA, NA  
"26213", "HTR4", 0, NA, NA, NA, NA, NA  
"26214", "C5orf47", 0, NA, NA, NA, NA, NA  
"26215", "TRIM31", 0, NA, NA, NA, NA, NA  
"26216", "AL133334.1", 0, NA, NA, NA, NA, NA  
"26217", "AL161618.1", 0, NA, NA, NA, NA, NA  
"26218", "POU3F2", 0, NA, NA, NA, NA, NA  
"26219", "AL365214.2", 0.100823152638361, -1.35173207482145, 3.35247519753  
738, -0.40320419844251, 0.686798011343181, NA  
"26220", "AL355312.4", 0, NA, NA, NA, NA, NA  
"26221", "AL355297.2", 0, NA, NA, NA, NA, NA  
"26222", "AL121956.1", 0, NA, NA, NA, NA, NA  
"26223", "AL121956.6", 0, NA, NA, NA, NA, NA  
"26224", "AL606970.5", 0.100823152638361, -1.35173207482145, 3.35247519753  
738, -0.40320419844251, 0.686798011343181, NA  
"26225", "AC188617.1", 0, NA, NA, NA, NA, NA  
"26226", "EVX1", 0, NA, NA, NA, NA, NA  
"26227", "IGFBP1", 0, NA, NA, NA, NA, NA  
"26228", "AC004023.1", 0, NA, NA, NA, NA, NA  
"26229", "ZAN", 0, NA, NA, NA, NA, NA  
"26230", "AC254629.1", 0.269388390240736, -2.09481427187859, 3.17548848369  
632, -0.659682528415343, 0.509457580965155, NA  
"26231", "NAT16", 0.100823152638361, -1.35173207482145, 3.35247519753738, -  
0.40320419844251, 0.686798011343181, NA  
"26232", "AC011005.1", 0, NA, NA, NA, NA, NA  
"26233", "TRPV6", 0, NA, NA, NA, NA, NA  
"26234", "AC006372.1", 0, NA, NA, NA, NA, NA  
"26235", "AC107918.6", 0, NA, NA, NA, NA, NA  
"26236", "AC131254.1", 0, NA, NA, NA, NA, NA  
"26237", "AC138646.1", 0, NA, NA, NA, NA, NA  
"26238", "RALYL", 0, NA, NA, NA, NA, NA  
"26239", "INSL4", 0, NA, NA, NA, NA, NA  
"26240", "AL353770.4", 0, NA, NA, NA, NA, NA  
"26241", "GDA", 0, NA, NA, NA, NA, NA  
"26242", "AL137847.2", 0, NA, NA, NA, NA, NA  
"26243", "AL390838.1", 0.100823152638361, -1.35173207482145, 3.35247519753  
738, -0.40320419844251, 0.686798011343181, NA  
"26244", "LINC01508", 0, NA, NA, NA, NA, NA  
"26245", "LINC01501", 0, NA, NA, NA, NA, NA

"26246", "BARX1", 0, NA, NA, NA, NA, NA  
"26247", "C9orf152", 0, NA, NA, NA, NA, NA  
"26248", "AL354754.1", 0, NA, NA, NA, NA, NA  
"26249", "AL353803.2", 0, NA, NA, NA, NA, NA  
"26250", "PAEP", 0, NA, NA, NA, NA, NA  
"26251", "LCN8", 0, NA, NA, NA, NA, NA  
"26252", "CACNA1B", 0.100823152638361, -1.35173207482145, 3.35247519753738  
, -0.40320419844251, 0.686798011343181, NA  
"26253", "AL139280.2", 0, NA, NA, NA, NA, NA  
"26254", "OGDHL", 0, NA, NA, NA, NA, NA  
"26255", "AC025038.1", 0, NA, NA, NA, NA, NA  
"26256", "CYP26A1", 0, NA, NA, NA, NA, NA  
"26257", "AC124301.1", 0, NA, NA, NA, NA, NA  
"26258", "AC116021.1", 0, NA, NA, NA, NA, NA  
"26259", "GLYAT", 0, NA, NA, NA, NA, NA  
"26260", "AP003306.2", 0, NA, NA, NA, NA, NA  
"26261", "AP002498.1", 0, NA, NA, NA, NA, NA  
"26262", "AP002008.4", 0, NA, NA, NA, NA, NA  
"26263", "PLET1", 0, NA, NA, NA, NA, NA  
"26264", "MFRP", 0, NA, NA, NA, NA, NA  
"26265", "AP002856.3", 0, NA, NA, NA, NA, NA  
"26266", "AC026369.1", 0, NA, NA, NA, NA, NA  
"26267", "KLRF2", 0, NA, NA, NA, NA, NA  
"26268", "CLEC2A", 0.100823152638361, -1.35173207482145, 3.35247519753738,  
-0.40320419844251, 0.686798011343181, NA  
"26269", "NTS", 0.100823152638361, -1.35173207482145, 3.35247519753738, -0.  
40320419844251, 0.686798011343181, NA  
"26270", "AC024941.1", 0, NA, NA, NA, NA, NA  
"26271", "AC078916.1", 0, NA, NA, NA, NA, NA  
"26272", "LHX5", 0, NA, NA, NA, NA, NA  
"26273", "ZNF84-DT", 0, NA, NA, NA, NA, NA  
"26274", "SACS-AS1", 0, NA, NA, NA, NA, NA  
"26275", "AMER2", 0, NA, NA, NA, NA, NA  
"26276", "CDX2", 0, NA, NA, NA, NA, NA  
"26277", "LINC01069", 0.100823152638361, -1.35173207482145, 3.352475197537  
38, -0.40320419844251, 0.686798011343181, NA  
"26278", "AL161668.4", 0, NA, NA, NA, NA, NA  
"26279", "AL591770.1", 0.100823152638361, -1.35173207482145, 3.35247519753  
738, -0.40320419844251, 0.686798011343181, NA  
"26280", "LINC02291", 0, NA, NA, NA, NA, NA  
"26281", "LINC00929", 0, NA, NA, NA, NA, NA  
"26282", "FAM189A1", 0, NA, NA, NA, NA, NA  
"26283", "AC091074.2", 0.100823152638361, -1.35173207482145, 3.35247519753  
738, -0.40320419844251, 0.686798011343181, NA  
"26284", "AC100825.1", 0.100823152638361, -1.35173207482145, 3.35247519753  
738, -0.40320419844251, 0.686798011343181, NA  
"26285", "AC026992.1", 0, NA, NA, NA, NA, NA  
"26286", "AC024337.1", 0, NA, NA, NA, NA, NA  
"26287", "AC005632.5", 0.100823152638361, -1.35173207482145, 3.35247519753  
738, -0.40320419844251, 0.686798011343181, NA

"26288", "AC137761.1", 0, NA, NA, NA, NA, NA  
"26289", "LINC01082", 0, NA, NA, NA, NA, NA  
"26290", "CA5A", 0, NA, NA, NA, NA, NA  
"26291", "LINC02091", 0, NA, NA, NA, NA, NA  
"26292", "AC091153.4", 0, NA, NA, NA, NA, NA  
"26293", "AC135178.4", 0, NA, NA, NA, NA, NA  
"26294", "AC005291.2", 0.100823152638361, -1.35173207482145, 3.35247519753  
738, -0.40320419844251, 0.686798011343181, NA  
"26295", "PIRT", 0, NA, NA, NA, NA, NA  
"26296", "AC244100.4", 0, NA, NA, NA, NA, NA  
"26297", "LHX1", 0, NA, NA, NA, NA, NA  
"26298", "CCDC103", 0, NA, NA, NA, NA, NA  
"26299", "PICART1", 0, NA, NA, NA, NA, NA  
"26300", "CHAD", 0, NA, NA, NA, NA, NA  
"26301", "AC091059.1", 0, NA, NA, NA, NA, NA  
"26302", "AP005328.1", 0.100823152638361, -1.35173207482145, 3.35247519753  
738, -0.40320419844251, 0.686798011343181, NA  
"26303", "AC068506.1", 0, NA, NA, NA, NA, NA  
"26304", "AC009899.1", 0, NA, NA, NA, NA, NA  
"26305", "AC110014.1", 0.100823152638361, -1.35173207482145, 3.35247519753  
738, -0.40320419844251, 0.686798011343181, NA  
"26306", "AC090246.1", 0, NA, NA, NA, NA, NA  
"26307", "AC022035.1", 0.100823152638361, -1.35173207482145, 3.35247519753  
738, -0.40320419844251, 0.686798011343181, NA  
"26308", "CLEC4M", 0, NA, NA, NA, NA, NA  
"26309", "RTBDN", 0.100823152638361, -1.35173207482145, 3.35247519753738, -  
0.40320419844251, 0.686798011343181, NA  
"26310", "AC011509.1", 0, NA, NA, NA, NA, NA  
"26311", "CYP4F11", 0, NA, NA, NA, NA, NA  
"26312", "LINC01855", 0, NA, NA, NA, NA, NA  
"26313", "KRTDAP", 0.201646305276721, -1.9490730241217, 3.3359781915796, -0  
.584258323103367, 0.559046527482917, NA  
"26314", "AC002398.1", 0, NA, NA, NA, NA, NA  
"26315", "AC011479.2", 0.100823152638361, -1.35173207482145, 3.35247519753  
738, -0.40320419844251, 0.686798011343181, NA  
"26316", "AC011445.1", 0, NA, NA, NA, NA, NA  
"26317", "PSG11", 0, NA, NA, NA, NA, NA  
"26318", "KLK4", 0, NA, NA, NA, NA, NA  
"26319", "SIGLECL1", 0, NA, NA, NA, NA, NA  
"26320", "CACNG6", 0, NA, NA, NA, NA, NA  
"26321", "SBK3", 0, NA, NA, NA, NA, NA  
"26322", "ZSCAN5B", 0.269388390240736, -2.09481427187859, 3.17548848369632  
, -0.659682528415343, 0.509457580965155, NA  
"26323", "RAD21L1", 0, NA, NA, NA, NA, NA  
"26324", "AL356414.1", 0, NA, NA, NA, NA, NA  
"26325", "SEMG1", 0, NA, NA, NA, NA, NA  
"26326", "AL132822.1", 0, NA, NA, NA, NA, NA  
"26327", "AP000688.2", 0, NA, NA, NA, NA, NA  
"26328", "GPR143", 0, NA, NA, NA, NA, NA  
"26329", "AC092832.2", 0.100823152638361, -1.35173207482145, 3.35247519753

738,-0.40320419844251,0.686798011343181,NA  
"26330","PCYT1B",0,NA,NA,NA,NA,NA  
"26331","AL121578.2",0,NA,NA,NA,NA,NA  
"26332","TCEAL6",0,NA,NA,NA,NA,NA  
"26333","RIPPLY1",0.302469457915082,-2.33550018378661,3.3206786067292,  
-0.703320152409159,0.481856254557762,NA  
"26334","AC235097.1",0,NA,NA,NA,NA,NA  
"26335","KC877982.1",0,NA,NA,NA,NA,NA  
"26336","AC136612.1",0,NA,NA,NA,NA,NA  
"26337","AL020998.1",0,NA,NA,NA,NA,NA  
"26338","AL512288.1",0,NA,NA,NA,NA,NA  
"26339","AC114489.1",0,NA,NA,NA,NA,NA  
"26340","LINC01748",0,NA,NA,NA,NA,NA  
"26341","LINC01362",0,NA,NA,NA,NA,NA  
"26342","REG4",0,NA,NA,NA,NA,NA  
"26343","HJV",0,NA,NA,NA,NA,NA  
"26344","SMCP",0,NA,NA,NA,NA,NA  
"26345","BLACAT1",0,NA,NA,NA,NA,NA  
"26346","AC093390.1",0,NA,NA,NA,NA,NA  
"26347","DPP10",0,NA,NA,NA,NA,NA  
"26348","LINC02085",0,NA,NA,NA,NA,NA  
"26349","ARGFX",0,NA,NA,NA,NA,NA  
"26350","COL6A5",0,NA,NA,NA,NA,NA  
"26351","LINC01208",0,NA,NA,NA,NA,NA  
"26352","LINC02037",0,NA,NA,NA,NA,NA  
"26353","AC104662.1",0,NA,NA,NA,NA,NA  
"26354","LINC02261",0,NA,NA,NA,NA,NA  
"26355","LINC01258",0,NA,NA,NA,NA,NA  
"26356","GRID2",0,NA,NA,NA,NA,NA  
"26357","AC108515.1",0,NA,NA,NA,NA,NA  
"26358","AC096747.1",0,NA,NA,NA,NA,NA  
"26359","AC104123.1",0,NA,NA,NA,NA,NA  
"26360","AC005740.5",0,NA,NA,NA,NA,NA  
"26361","LINC01944",0,NA,NA,NA,NA,NA  
"26362","AC008443.3",0,NA,NA,NA,NA,NA  
"26363","AL109914.1",0,NA,NA,NA,NA,NA  
"26364","MLIP-AS1",0,NA,NA,NA,NA,NA  
"26365","AL590814.1",0,NA,NA,NA,NA,NA  
"26366","VGLL2",0,NA,NA,NA,NA,NA  
"26367","AL365259.1",0,NA,NA,NA,NA,NA  
"26368","AL590006.1",0,NA,NA,NA,NA,NA  
"26369","EZR-AS1",0,NA,NA,NA,NA,NA  
"26370","AC093627.1",0,NA,NA,NA,NA,NA  
"26371","AC073957.1",0,NA,NA,NA,NA,NA  
"26372","AC003986.1",0,NA,NA,NA,NA,NA  
"26373","TRGV11",0,NA,NA,NA,NA,NA  
"26374","GJC3",0,NA,NA,NA,NA,NA  
"26375","PRSS58",0,NA,NA,NA,NA,NA  
"26376","TRBV13",0,NA,NA,NA,NA,NA  
"26377","LLCFC1",0,NA,NA,NA,NA,NA

"26378", "GALNTL5", 0.505695712807125, -2.90223896060942, 3.11816310694988  
,-0.930752773689357, 0.351981463997368, NA  
"26379", "AC010857.1", 0, NA, NA, NA, NA, NA  
"26380", "ALKAL1", 0, NA, NA, NA, NA, NA  
"26381", "OPRK1", 0, NA, NA, NA, NA, NA  
"26382", "AC023095.1", 0, NA, NA, NA, NA, NA  
"26383", "PSKH2", 0, NA, NA, NA, NA, NA  
"26384", "CNGB3", 0, NA, NA, NA, NA, NA  
"26385", "AC025370.2", 0, NA, NA, NA, NA, NA  
"26386", "ABRA", 0, NA, NA, NA, NA, NA  
"26387", "ANXA13", 0, NA, NA, NA, NA, NA  
"26388", "AL360268.1", 0, NA, NA, NA, NA, NA  
"26389", "AL513128.1", 0, NA, NA, NA, NA, NA  
"26390", "AC073370.1", 0, NA, NA, NA, NA, NA  
"26391", "ANKRD1", 0, NA, NA, NA, NA, NA  
"26392", "AL356608.1", 0, NA, NA, NA, NA, NA  
"26393", "AL360182.2", 0, NA, NA, NA, NA, NA  
"26394", "OR10A4", 0, NA, NA, NA, NA, NA  
"26395", "FBX03-DT", 0, NA, NA, NA, NA, NA  
"26396", "MAJIN", 0, NA, NA, NA, NA, NA  
"26397", "AP003065.1", 0, NA, NA, NA, NA, NA  
"26398", "AP001972.1", 0, NA, NA, NA, NA, NA  
"26399", "C11orf97", 0, NA, NA, NA, NA, NA  
"26400", "RXYLT1-  
AS1", 0.168565237602375, -1.35173207482145, 3.35247519753738, -0.403204198  
44251, 0.686798011343181, NA  
"26401", "AL133371.3", 0, NA, NA, NA, NA, NA  
"26402", "AL132718.1", 0, NA, NA, NA, NA, NA  
"26403", "IGHV4-31", 0, NA, NA, NA, NA, NA  
"26404", "AC114546.2", 0, NA, NA, NA, NA, NA  
"26405", "AC025271.4", 0.168565237602375, -1.35173207482145, 3.35247519753  
738, -0.40320419844251, 0.686798011343181, NA  
"26406", "ACAN", 0, NA, NA, NA, NA, NA  
"26407", "RPL3L", 0, NA, NA, NA, NA, NA  
"26408", "HCCAT5", 0, NA, NA, NA, NA, NA  
"26409", "FBXW10", 0, NA, NA, NA, NA, NA  
"26410", "AC243571.2", 0, NA, NA, NA, NA, NA  
"26411", "GFAP", 0, NA, NA, NA, NA, NA  
"26412", "AC036222.1", 0, NA, NA, NA, NA, NA  
"26413", "AC016168.4", 0, NA, NA, NA, NA, NA  
"26414", "NOTUM", 0, NA, NA, NA, NA, NA  
"26415", "LINC01902", 0, NA, NA, NA, NA, NA  
"26416", "AC068473.1", 0, NA, NA, NA, NA, NA  
"26417", "FUT5", 0, NA, NA, NA, NA, NA  
"26418", "AC008759.2", 0, NA, NA, NA, NA, NA  
"26419", "LGALS14", 0, NA, NA, NA, NA, NA  
"26420", "AL121899.3", 0, NA, NA, NA, NA, NA  
"26421", "LINC01441", 0, NA, NA, NA, NA, NA  
"26422", "MIR1-1HG", 0, NA, NA, NA, NA, NA  
"26423", "CHRNA4", 0, NA, NA, NA, NA, NA

"26424", "TPTE", 0, NA, NA, NA, NA, NA  
"26425", "AL049536.1", 0.168565237602375, -1.35173207482145, 3.35247519753  
738, -0.40320419844251, 0.686798011343181, NA  
"26426", "AL050402.1", 0, NA, NA, NA, NA, NA  
"26427", "AC004832.1", 0, NA, NA, NA, NA, NA  
"26428", "NHS-AS1", 0, NA, NA, NA, NA, NA  
"26429", "LINC01456", 0, NA, NA, NA, NA, NA  
"26430", "SMPX", 0, NA, NA, NA, NA, NA  
"26431", "PNMA6F", 0, NA, NA, NA, NA, NA  
"26432", "AC233755.2", 0, NA, NA, NA, NA, NA
