# Supplementary material for: PPARγ agonist treatment reduces fibroadipose tissue in secondary lymphedema by exhausting fibroadipogenic PDGFRα+ mesenchymal cells
Source: JCI journal article supplement (doi:10.1172/jci.insight.165324), 2023-12-21
Supplement: sd11 [file 11]

**Supplementary Table 10. Antibody information.**

---

| Antibody             | Cat No. | Company                                       |
|----------------------|---------|-----------------------------------------------|
| APC-PDGFR $\alpha$   | 135908  | BioLegend, San Diego, CA, USA                 |
| Ki67                 | AB9260  | EMD Millipore Corporation, Temecula, CA, USA  |
| FITC-CD4             | 100406  | BioLegend, San Diego, CA, USA                 |
| PDGFR $\alpha$       | 3174    | Cell Signaling Technology, Massachusetts, USA |
| pSMAD2/3             | 8828S   | Cell Signaling Technology, Massachusetts, USA |
| PPAR-gamma           | ABN1445 | EMD Millipore Corporation, Temecula, CA, USA  |
| Alexa Fluor Plus 488 | A32731  | Invitrogen, Carlsbad, CA, USA                 |
| goat anti-rabbit IgG |         |                                               |
| Alexa Fluor 594 goat | A32740  | Invitrogen, Carlsbad, CA, USA                 |
| anti-rabbit IgG      |         |                                               |

---
